# Supplementary material for: OsJAZ1 Attenuates Drought Resistance by Regulating JA and ABA Signaling in Rice
Source: Front Plant Sci. 2017 Dec 11;8:2108. doi: 10.3389/fpls.2017.02108 (PMC5733117; doi:10.3389/fpls.2017.02108)
Supplement: Supplementary file 3 [file Data_Sheet_1.xlsx]

## Sheet: All.DEG_final
Supplementary File 1. The expression levels (FPKM) of all DEGs in drought-treated wild-type and overexpression plants compared with respective controls.
MSU Locus	OE_D1	OE_D2	OE_N1	OE_N2	OE_N3	ZH11_D1	ZH11_D2	ZH11_N1	ZH11_N2	ZH11_N3
ChrSy.fgenesh.gene.25	47.0297	38.0728	9.02104	10.054	8.46143	49.0101	49.345	8.73287	12.3909	10.0681
ChrSy.fgenesh.gene.32	1.69835	1.42307	0.61185	0.415502	0.438388	1.07419	1.05793	0.331128	0.432441	0.47259
ChrSy.fgenesh.gene.37	58.9571	54.0701	17.358	14.7843	15.8957	61.256	61.0936	15.324	15.4134	14.7118
LOC_Os01g01170	0.0307106	0.0578729	0.157834	0.329519	0.489982	0.0546302	0.02226	0.168492	0.282124	0.0452827
LOC_Os01g01190	1.36194	1.91761	2.85667	3.29705	2.93241	1.04411	0.998528	3.16422	3.51622	2.34588
LOC_Os01g01430	3.9	1.85282	3.28049	0.731426	1.63743	4.03624	2.56272	1.30369	0.722133	1.4412
LOC_Os01g01620	205.627	161.295	48.475	48.822	50.7817	185.174	195.403	45.5673	44.716	47.8258
LOC_Os01g01650	46.4032	45.9506	76.0958	92.217	73.771	36.5491	41.1538	66.0639	83.5806	82.3209
LOC_Os01g01890	0.175159	0.0946836	0.852042	1.16872	1.85334	0.167866	0.0215343	1.04403	1.52747	0.788106
LOC_Os01g02020	13.235	14.6624	8.58033	6.90667	7.65905	14.8557	16.1125	7.94347	7.69023	7.79937
LOC_Os01g02060	4.89198	8.0686	11.7626	10.263	15.1366	4.66425	4.68786	10.3621	19.3515	8.47251
LOC_Os01g02370	2.54656	2.0591	7.16279	6.85927	7.01204	2.6842	1.8577	7.90663	6.78494	6.58554
LOC_Os01g02400	5.6236	5.11006	13.8703	11.6083	12.779	4.55953	4.0676	11.7306	10.74	11.0553
LOC_Os01g02560	4.75499	4.0743	8.97251	7.73056	8.12036	3.64499	2.77424	7.0386	6.04227	6.54794
LOC_Os01g02570	2.35626	1.64966	5.18902	3.9118	4.92978	1.04938	1.049	3.68687	2.80554	2.54968
LOC_Os01g02580	1.45255	0.997495	3.43748	3.12064	3.37188	0.752331	0.804402	2.78105	2.81873	2.25339
LOC_Os01g02600	4.45585	4.43247	11.1166	9.67931	11.0219	2.93457	2.82903	9.08983	8.09109	7.86199
LOC_Os01g02740	0.0401658	0.0172474	0.117137	0.124763	0.108295	0.0512298	0.0109196	0.0884497	0.0635307	0.0442009
LOC_Os01g02750	0.787281	0.663047	2.42024	1.88455	1.97621	0.758419	0.567136	1.3795	1.18888	1.28562
LOC_Os01g02780	2.46442	2.16913	4.54	3.77603	4.89779	1.02907	1.02432	2.95776	2.50268	2.67861
LOC_Os01g02790	1.77067	1.68283	3.29408	2.84271	3.63023	1.17988	1.08863	2.31847	2.48965	2.24478
LOC_Os01g03130	8.56568	6.13092	2.41822	3.60736	3.18203	8.5713	4.98034	2.67484	3.35251	3.53601
LOC_Os01g03310	72.1781	65.8336	38.0179	38.7652	45.0598	81.7804	91.9014	29.3563	28.5201	49.8496
LOC_Os01g03320	10.1232	7.24666	1.07159	3.26502	5.61798	6.84753	10.7748	0.887324	1.43133	8.00071
LOC_Os01g03340	6.25575	7.06029	0.713119	0.834313	0.854718	3.52706	7.34067	0.312715	0.411252	0.62257
LOC_Os01g03360	1.12	3.74081	0.163229	0.189667	0.15992	0.823244	1.8658	0	0.109254	0
LOC_Os01g03390	136.882	116.449	15.4815	13.0125	18.5857	67.2654	93.9269	9.69718	9.33155	12.1519
LOC_Os01g03680	4.6603	3.8401	0.458018	1.8517	2.27017	4.00396	10.1102	1.4363	3.64679	10.3695
LOC_Os01g03710	2.8218	2.02729	1.27519	0.924259	1.10885	2.42739	1.97007	0.811111	1.29243	1.35264
LOC_Os01g03914	17.72	16.3079	8.65458	8.17167	8.08624	17.9319	19.0856	7.62185	6.94578	6.6598
LOC_Os01g03940	14.3718	16.3129	34.6003	32.1293	33.4772	12.3479	10.935	39.9082	36.7961	36.7339
LOC_Os01g04050	40.182	49.5744	21.3307	25.5254	30.6773	36.4303	50.7545	10.068	21.4388	17.4114
LOC_Os01g04170	0.10526	0.424697	1.38288	1.25209	2.96382	0.0997943	0.372791	0.49632	2.03675	1.05106
LOC_Os01g04230	2.62206	3.15525	7.60648	5.87233	6.79083	1.5608	1.88977	5.3751	8.19276	4.22562
LOC_Os01g04330	115.089	80.0341	20.0749	16.8132	20.5115	212.423	87.9712	17.6854	19.3474	21.1026
LOC_Os01g04360	22.1663	36.0917	1.96171	1.45388	2.32433	31.6865	46.6049	2.10789	2.81248	1.06168
LOC_Os01g04370	159.16	211.833	5.54644	3.54519	4.62797	150.307	299.255	4.8134	4.74531	5.25587
LOC_Os01g04380	19.1687	27.3613	5.79156	5.22596	6.49056	37.2301	71.9704	4.07908	6.32524	3.92159
LOC_Os01g04390	5.42701	3.36303	7.42021	10.5156	9.27445	1.88713	1.593	8.55733	7.71224	7.49644
LOC_Os01g04590	24.1841	21.7697	8.5477	10.4831	8.62492	20.4653	29.9353	9.21872	8.05563	9.04147
LOC_Os01g04640	5.68078	4.58806	8.04291	8.19433	7.9479	4.28255	4.00447	8.07789	10.9895	8.90238
LOC_Os01g04670	2.98768	3.11181	1.20432	1.08023	1.25395	2.23026	3.15272	1.79162	1.62459	1.58428
LOC_Os01g04710	22.325	30.3942	51.6148	65.0671	53.4832	16.2949	24.6385	59.2421	69.3665	46.2072
LOC_Os01g05064	26.2843	22.3684	41.8904	40.6891	41.8008	21.6087	20.2312	42.8808	40.3101	52.4432
LOC_Os01g05150	6.67631	6.25117	3.36651	1.86714	3.86897	4.85488	5.4851	3.82153	3.68208	2.97398
LOC_Os01g05830	13.5883	13.3617	6.49619	6.71948	7.62313	14.6973	16.1576	6.29543	6.36392	5.80569
LOC_Os01g05840	14.6802	26.8853	48.8033	51.5845	55.2882	13.2777	20.3882	42.7163	64.645	31.329
LOC_Os01g06310	186.407	215.749	11.1897	17.4661	25.7855	187.317	125.259	22.6611	21.0186	30.1157
LOC_Os01g06640	20.7856	17.3818	7.91877	7.47526	7.20764	14.0932	12.2335	5.39989	4.97733	6.24856
LOC_Os01g06740	11.5456	7.73696	2.96114	1.45035	2.197	7.50628	6.64279	2.07749	1.75204	2.39309
LOC_Os01g07130	1.59378	1.90723	1.08323	0.717896	0.927873	2.47957	1.93271	0.924294	0.797025	0.876189
LOC_Os01g07300	18.1382	13.8156	7.11181	6.80764	4.89185	17.3629	15.6855	6.20627	5.47657	8.28765
LOC_Os01g07360	0.640121	1.00137	1.47245	2.04204	1.69582	0.647244	0.515168	1.60778	2.03872	1.22388
LOC_Os01g07376	23.6536	21.9753	11.4198	11.7322	12.4626	18.8808	21.6858	10.3108	8.96127	10.8439
LOC_Os01g07500	2.79926	3.00404	4.6976	5.15554	5.43802	2.10971	1.48993	5.10722	5.59094	5.91667
LOC_Os01g07570	3.15706	3.98587	5.74394	8.7865	7.74838	2.37184	3.40728	6.23354	9.63708	6.08229
LOC_Os01g08020	1.093	0.944582	7.90446	5.12978	5.11513	1.80896	2.36461	7.59132	6.63193	5.96507
LOC_Os01g08130	4.10626	5.62711	7.34478	13.725	4.89518	3.48303	4.02084	11.4028	11.7918	5.84872
LOC_Os01g08150	0.0576745	0.0689779	0.58927	0.74893	1.42844	0.0510179	0.0279459	0.375941	1.01989	0.403463
LOC_Os01g08220	1.53391	1.94865	5.6545	4.91251	5.27178	1.73486	3.66517	5.42988	6.53474	6.12283
LOC_Os01g08260	4.861	8.05094	12.3395	15.5883	17.4756	4.60954	5.97859	12.5269	17.2793	9.95091
LOC_Os01g08470	1.2859	1.93071	3.60868	4.5449	5.07098	1.6882	1.84145	4.24053	5.99611	3.66189
LOC_Os01g08670	7.81197	10.0482	14.125	15.6296	12.2917	5.37268	6.04105	13.9929	16.0454	17.8915
LOC_Os01g08780	5.30882	5.78689	2.42695	2.18887	3.47594	5.3791	5.29342	1.77191	2.32936	2.33699
LOC_Os01g08860	207.161	352.942	90.165	125.869	177.655	429.714	677.546	105.79	154.434	94.8087
LOC_Os01g09100	4.74942	3.35177	1.06714	1.72404	0.827308	2.95864	3.38409	0.988903	0.673365	1.37052
LOC_Os01g09190	2.43734	2.7257	6.45855	3.34715	5.08769	1.52418	1.6538	10.4793	6.87437	6.56054
LOC_Os01g09220	3.79561	3.105	1.02135	0.320416	0.890166	43.5539	0.300511	0.000278643	1.68552	0.443835
LOC_Os01g09460	1.25312	1.34788	0.65151	0.819501	0.756529	1.45588	0.871633	0.456173	0.589674	0.393957
LOC_Os01g09580	0.049786	0.176591	0.968772	1.4438	3.08931	0.0183281	0.0223827	0.748806	2.11294	0.653974
LOC_Os01g09640	102.799	75.4065	22.3276	21.6827	20.7391	95.3741	98.5734	22.3496	22.6133	24.7602
LOC_Os01g09660	3.73244	3.4628	1.12	1.22912	1.6209	1.8456	2.85627	1.87804	2.26959	1.35206
LOC_Os01g09665	0.766986	1.12597	0.112312	0.394101	0.310085	0.905304	0.760548	0.181397	0.528155	0.239824
LOC_Os01g09830	36.7287	37.8304	88.9593	72.3594	66.1499	34.0557	32.0994	100.347	86.4047	99.2361
LOC_Os01g09870	4.42988	3.74859	0.396078	0.232644	0.882254	9.31012	1.9146	0.183188	1.34131	0.547613
LOC_Os01g09930	0.594053	0.934923	0.978055	1.11854	1.06538	0.655033	0.459193	1.43576	1.27727	1.33106
LOC_Os01g10110	0.192063	0.153239	1.49421	1.59797	1.70652	0.356222	0.175884	0.784172	0.95878	0.792966
LOC_Os01g10180	2.94294	4.13463	5.92367	9.38299	10.7207	4.32273	3.48168	7.80437	9.19353	8.78249
LOC_Os01g10320	23.8272	22.3061	2.24358	2.75257	2.90771	22.3636	29.0003	2.54102	2.52673	2.80427
LOC_Os01g10370	3.05	2.7048	0	0.135233	0.0568534	2.6881	4.77633	0.0513789	0.0596085	0
LOC_Os01g10490	8.90545	24.2361	46.631	49.248	86.9537	3.82269	11.1442	32.1388	100.428	22.8157
LOC_Os01g10850	2.52766	3.34857	7.03046	8.75943	9.92652	1.93962	2.16882	6.15253	9.36551	7.3751
LOC_Os01g10890	14.6708	11.6218	6.2582	5.24006	4.5723	11.3807	14.6218	6.08703	5.68384	5.1303
LOC_Os01g10950	7.82361	7.17099	12.4487	14.1729	12.3703	4.97807	6.22525	13.3678	14.2302	13.7345
LOC_Os01g11010	1.158	1.28646	5.90207	5.24378	4.8585	1.29146	1.19376	5.63059	7.84419	4.76996
LOC_Os01g11150	1.74445	1.69413	2.65417	1.52685	1.10827	5.13597	5.90371	1.38926	0.723452	2.49458
LOC_Os01g11160	40.7695	32.6707	79.2719	60.4788	59.9078	31.3706	31.5704	81.0307	68.8796	69.175
LOC_Os01g11210	0.425972	0.259933	2.12681	2.57356	2.78758	0.485194	0.607997	2.06163	2.31585	1.53098
LOC_Os01g11340	2.53666	1.99709	4.88696	4.28397	4.36327	1.94972	1.87515	4.36275	6.30022	6.37147
LOC_Os01g11350	1.1169	2.09787	6.05165	7.90582	9.29564	0.450423	1.10105	5.93254	9.72552	5.40517
LOC_Os01g11590	367.75	214.764	18.7568	12.6079	18.1473	329.862	466.614	13.5182	12.573	16.064
LOC_Os01g11660	0.806816	0.983468	1.98385	2.33152	1.71109	0.411124	0.389983	1.81423	1.46593	1.16573
LOC_Os01g11700	5.32663	5.57541	7.21318	11.5943	8.88241	3.51408	3.45197	6.90776	7.52682	7.81315
LOC_Os01g11810	4.83205	4.6475	12.0963	13.476	11.4562	3.06289	2.32874	9.04184	14.3862	8.7778
LOC_Os01g11860	1.95902	1.99476	6.03558	5.31395	6.22502	1.30077	1.1756	3.3656	4.00582	3.50477
LOC_Os01g12130	2.13587	2.30017	4.3251	4.71743	3.21525	1.46898	1.55669	3.47387	4.77184	3.34092
LOC_Os01g12260	0.772175	0.807856	1.73587	2.43522	2.53395	0.806373	0.654768	1.75121	2.30984	1.4456
LOC_Os01g12470	8.88389	7.75572	4.74391	4.44163	4.15972	9.06457	8.7215	4.92993	4.06859	3.78359
LOC_Os01g12490	2.68721	1.94961	0.963605	1.0006	1.09813	3.48901	2.59396	1.3716	1.23275	1.16438
LOC_Os01g12520	44.6863	36.9709	16.1936	11.4553	12.9988	58.1808	60.6953	17.5722	19.1243	18.3031
LOC_Os01g12580	4.96923	5.09722	1.22972	1.25861	1.0334	3.85306	5.69793	1.1813	1.10654	1.2548
LOC_Os01g12640	5.07503	7.94297	10.9053	13.1156	11.2565	4.73103	6.16349	9.9122	12.5951	8.70508
LOC_Os01g12650	22.864	26.1082	46.2271	50.0276	54.2254	18.9467	19.5906	41.0675	64.0244	37.7433
LOC_Os01g12660	2.42561	4.35581	0.703641	0.879694	0.756431	3.55598	5.87836	0.723075	0.94332	0.65215
LOC_Os01g13140	0.771293	1.23573	4.70457	4.86846	4.90599	0.493643	1.01349	2.47976	5.67516	2.86887
LOC_Os01g13280	5.10922	5.61985	3.20954	3.2222	2.86893	6.24696	6.84613	2.80848	2.87312	2.93592
LOC_Os01g13520	4.94627	5.29618	11.738	11.9814	10.784	5.62427	6.04394	11.265	11.2836	9.76069
LOC_Os01g13610	0.0875683	0.0922446	2.69791	0.845864	3.43589	0.0867453	0.112668	1.11363	0.370523	0.687285
LOC_Os01g13930	8.57511	6.87527	1.26891	1.52718	1.58735	11.2146	10.6077	1.29815	1.49911	1.87304
LOC_Os01g14050	36.8159	35.7115	16.8094	17.4628	18.3187	36.2493	39.2345	15.998	15.7574	15.7669
LOC_Os01g14530	1.43366	0.912879	2.37839	2.85035	3.69207	0.84684	0.602399	1.51072	4.30729	2.78254
LOC_Os01g14850	19.1113	47.782	136.942	147.671	248.251	9.22225	21.2366	124.989	289.717	80.7354
LOC_Os01g14960	0.67942	0.738744	1.95564	2.55617	3.81403	0.682798	1.39748	2.24651	3.63214	4.5399
LOC_Os01g15000	33.0143	28.7897	14.7937	10.681	11.8412	43.5733	42.0545	12.0644	12.1169	12.5253
LOC_Os01g15039	0.476982	0.644989	1.75235	2.56482	1.80527	0.726903	0.740679	1.94833	2.22254	2.40036
LOC_Os01g15270	2832.78	3155.55	475.189	471.125	520.496	2781.65	3928.46	456.246	507.432	482.915
LOC_Os01g15650	0.470135	0.518954	0.0738491	0.124572	0.138586	0.52008	0.628999	0.170122	0.0444094	0.0831171
LOC_Os01g15970	4.17583	3.84282	8.44602	8.84777	8.24768	3.30958	3.33408	7.12301	9.35234	6.77596
LOC_Os01g16140	33.3167	69.2132	73.5968	146.325	96.7788	41.648	20.0441	58.749	70.5597	81.2045
LOC_Os01g16310	3.09541	2.08984	0.60922	0.523486	0.312267	5.37597	5.23835	0.939595	0.987685	1.04183
LOC_Os01g16360	1.31904	1.43372	0.812806	0.7583	0.810846	1.22318	1.27495	0.678631	0.515199	0.64598
LOC_Os01g16450	2.9123	3.86314	9.5084	10.1009	12.5755	2.48742	2.51878	7.72833	11.6017	6.33085
LOC_Os01g16650	0.28093	0.513776	4.36282	5.78863	11.5798	0.0700505	0.276768	3.76364	7.53574	3.55531
LOC_Os01g16920	3.29388	2.44319	0.287087	0.328604	0.347255	3.47671	3.45089	0.565556	0.148566	0.528592
LOC_Os01g17214	12.997	11.1372	31.2538	31.6221	29.4588	11.9473	8.48599	33.646	29.5684	33.5307
LOC_Os01g17330	0.354046	0.327425	0.847833	1.9967	2.61629	0.435209	0.275581	0.840724	1.02665	0.849276
LOC_Os01g18160	27.161	19.5124	8.14123	4.40027	7.2895	22.5554	11.1666	4.54762	3.83259	5.6181
LOC_Os01g18170	17.966	13.3856	5.62599	7.35156	7.81474	12.7194	22.7211	6.92182	10.4982	5.72729
LOC_Os01g18220	19.6562	15.5367	4.65901	4.33357	4.04274	17.4266	23.5922	4.17566	5.15636	4.03958
LOC_Os01g18230	12.9295	12.0446	3.74684	3.3377	3.98562	11.9898	10.9229	2.88632	2.62829	1.94564
LOC_Os01g18860	1.44012	1.69921	0.469935	0.826488	0.595492	0.974659	1.86758	0.508542	0.348183	0.494343
LOC_Os01g18930	0.0676408	0.152957	0.936577	1.04681	0.514757	0.35429	0.264139	3.22877	6.17848	7.5556
LOC_Os01g19130	37.4233	28.6951	21.9662	19.7622	18.5785	55.1253	36.302	22.8165	21.9729	20.9302
LOC_Os01g19170	0.954592	1.14283	3.21167	3.05955	3.50071	1.21729	1.25451	3.66324	3.54403	1.93104
LOC_Os01g19220	2.27332	2.53477	6.87152	8.6681	7.209	2.34013	1.62242	6.06296	9.40998	7.50797
LOC_Os01g19370	1.13687	1.92099	1.37018	2.62841	1.85047	1.22433	1.10788	2.98902	3.08327	2.81917
LOC_Os01g19480	4.94269	6.15299	9.78424	12.2692	10.8009	5.30545	5.493	10.3449	11.4097	10.4009
LOC_Os01g19770	2.58023	1.37546	0.37111	0.269203	0.136598	2.66745	8.45028	0.494606	0.292871	0.604354
LOC_Os01g20030	1.02527	0.518988	0.502848	0.362525	0	2.53724	2.92807	0.885188	0.442542	0.688472
LOC_Os01g20160	0.211457	0.319492	0.816532	0.566932	0.910527	0.191559	0.240423	0.739656	0.904601	0.915992
LOC_Os01g20206	12.3799	15.1848	9.71563	3.87212	8.01261	19.235	12.049	6.01082	4.2351	7.34296
LOC_Os01g20780	2.39703	4.28144	11.791	19.8094	21.8871	2.73654	5.24888	17.5253	20.8811	13.2765
LOC_Os01g20830	15.6345	13.0387	30.6521	31.9459	28.1214	12.8755	12.0281	44.1259	39.0217	40.5955
LOC_Os01g20860	5.88551	6.35598	3.05031	2.98489	3.36885	6.9007	6.23601	2.50565	3.1324	2.82393
LOC_Os01g21034	12.1023	16.8655	27.1426	37.5346	34.931	10.9158	10.3113	29.8443	38.0568	32.2129
LOC_Os01g21250	246.739	200.661	87.2517	44.5916	70.9213	291.873	156.33	46.3134	34.3803	71.0584
LOC_Os01g21420	54.8253	63.0264	27.0108	29.4773	28.0469	82.2691	89.1341	27.6647	24.2593	28.4868
LOC_Os01g22230	5.87302	7.83236	8.69362	11.9642	13.6145	5.55681	5.268	11.3754	14.8566	11.7166
LOC_Os01g22352	14.9403	12.8348	5.01211	5.89145	5.66795	9.86046	13.4813	4.80417	5.94317	6.42808
LOC_Os01g22910	2.97873	3.491	12.2764	12.7101	11.4828	2.65527	2.73264	13.0594	13.3013	11.7137
LOC_Os01g22980	4.08534	5.24071	21.6696	23.2957	21.7103	5.28995	4.50677	26.2471	23.8105	26.613
LOC_Os01g23970	0.465983	0.420058	1.98584	1.30927	1.47523	0.294948	0.300588	1.6023	1.46533	1.37498
LOC_Os01g23990	118.262	97.6286	48.1129	35.0224	33.4929	94.0233	93.932	79.6841	52.0251	55.3667
LOC_Os01g24710	77.8401	59.7638	37.4489	31.5678	36.7677	46.7433	50.4054	16.6439	19.6539	22.8321
LOC_Os01g24720	4.45985	4.12817	2.27139	1.80551	1.836	4.65926	3.90286	1.95923	1.78883	2.45776
LOC_Os01g24780	2.55153	2.5744	5.33272	4.23842	4.02783	2.59496	2.21756	4.45586	6.41909	5.22868
LOC_Os01g24820	0.514055	0.394562	0.0151795	0.0352893	0.0597141	0.449382	0.644223	0.073916	0.0407145	0.0576349
LOC_Os01g25484	94.8917	86.8361	183.2	189.102	166.651	112.533	102.156	217.986	200.626	260.658
LOC_Os01g25500	16.1799	20.1914	37.8608	45.8637	32.7247	14.1907	20.7996	36.776	35.1778	39.1243
LOC_Os01g25540	55.6232	71.6287	176.039	178.858	192.799	67.4324	52.6304	162.683	198.953	157.842
LOC_Os01g25560	8.33636	12.0078	30.4595	35.4255	24.7721	6.38704	7.70319	25.3932	30.828	18.3988
LOC_Os01g25688	0.412289	0.260706	0.609498	0.453358	0.386806	0.531149	0.152951	0.511173	0.332813	0.26481
LOC_Os01g25990	42.7964	47.1521	20.5568	17.7395	17.0431	69.9377	64.0685	21.5213	20.5976	18.9226
LOC_Os01g26210	0.379226	0.158156	0.633704	0.428827	0.647416	0.0244207	0.0440147	0.466332	0.302013	0.281017
LOC_Os01g26270	1.26888	1.28942	3.19422	2.59641	3.1372	1.02235	0.861881	2.36303	2.54064	2.29835
LOC_Os01g26300	0.209881	0.170591	1.27414	0.44289	0.915323	0.0861965	0.312645	0.891704	0.346315	0.859307
LOC_Os01g27140	4.6123	2.61369	0.941819	2.38554	1.04451	3.97011	4.3753	0.532453	1.40026	1.32362
LOC_Os01g27230	9.14371	7.43778	24.5446	21.2412	19.3559	9.85756	10.0198	27.4361	24.7043	25.2741
LOC_Os01g27449	5.64977	7.44048	1.56397	1.83005	1.94743	7.36872	9.44009	1.53952	1.06532	0.842091
LOC_Os01g27760	0.198607	0.564844	1.1493	1.19037	0.891912	1.2664	0.503852	1.06281	1.31574	1.36631
LOC_Os01g28790	55.2929	36.1308	23.589	20.5516	24.2218	131.777	25.8533	19.9782	24.1439	25.4302
LOC_Os01g28840	3.29908	3.10609	0.799787	0.409131	0.341744	3.90529	4.45078	0.668449	0.413263	0.660362
LOC_Os01g31800	4.04027	4.77261	11.0511	10.9831	21.9163	1.50911	3.88176	8.09558	14.2314	6.19044
LOC_Os01g32330	391.232	354.226	180.497	162.614	166.848	339.738	404.435	169.813	173.919	175.087
LOC_Os01g32460	35.9584	35.3552	50.4456	44.262	45.2215	24.2116	24.6494	47.0705	45.4738	51.3663
LOC_Os01g32670	4.90896	3.93875	45.1924	83.4451	132.554	2.31728	3.43606	45.5849	58.2397	31.9905
LOC_Os01g32770	4.00023	2.37228	7.70393	9.4716	9.21854	2.55096	1.63274	9.66396	15.2966	9.59464
LOC_Os01g32780	104.795	80.6321	20.1137	17.978	17.7269	86.1349	109.894	18.2481	16.5403	16.6822
LOC_Os01g32920	1.48981	1.56673	3.32356	1.9675	2.123	0.408093	0.532957	2.6282	4.63865	1.68333
LOC_Os01g33040	0.0592175	0.120806	0.43656	0.582026	1.07847	0.0524037	0.0626953	0.317379	0.717353	0.22335
LOC_Os01g33080	0.946126	1.16681	2.23821	2.53659	2.91523	1.15151	1.27572	1.8206	3.34375	1.87167
LOC_Os01g33160	0.686864	0.880918	6.205	8.13626	6.23564	0.575725	0.466714	5.17513	7.67459	5.69449
LOC_Os01g33950	0.058095	0.0413792	0.212166	0.278497	0.152856	0.0404273	0.135653	0.103558	0.16074	0.121597
LOC_Os01g34560	2.13888	3.18882	7.25349	10.1452	8.50672	1.45143	1.39419	6.1255	11.1577	6.99438
LOC_Os01g34850	0.24636	0.408872	0.689385	0.576453	0.869039	0.181444	0.259525	0.920092	0.72406	0.752061
LOC_Os01g35330	230.352	297.589	329.311	275.393	294.891	8.28177	9.29961	18.1926	17.5704	17.7413
LOC_Os01g36220	32.462	35.5615	17.7476	15.5902	16.8984	30.5838	38.1105	17.5749	17.7496	17.5205
LOC_Os01g36240	12.2222	17.0944	7.12903	9.32228	8.53142	13.0351	18.4604	7.46209	8.51962	8.94004
LOC_Os01g36390	0.11154	0.291855	0.93361	1.18566	1.69552	0.0994587	0.111019	0.616992	1.1774	0.645234
LOC_Os01g36460	4.07805	6.33669	9.06787	9.00196	9.03666	3.77917	3.94693	8.05327	12.787	9.09131
LOC_Os01g36580	0.77026	0.471269	1.96905	1.6646	1.77048	0.405857	0.72285	2.08575	1.72901	1.79781
LOC_Os01g36660	1.34354	1.7591	2.72387	3.2495	3.76536	1.07955	1.33562	2.71816	3.7227	2.61755
LOC_Os01g36720	27.9104	28.185	117.656	117.301	108.554	23.7832	23.726	117.338	113.316	141.177
LOC_Os01g36790	2.2112	2.44558	0.847486	0.569331	0.904099	2.73421	2.76632	0.573196	0.73746	0.853619
LOC_Os01g37110	0.137153	0.212421	0.693357	0.418123	0.489851	0.0600912	0.0999924	0.557706	0.872428	0.25766
LOC_Os01g37810	6.6453	6.39739	3.36932	3.61452	1.43032	8.51295	4.60967	1.9027	1.71688	2.6331
LOC_Os01g37910	209.73	184.027	475.448	424.936	384.702	201.513	186.456	516.571	502.217	457.101
LOC_Os01g38229	81.0105	89.5652	166.683	157.319	163.768	69.1094	66.9783	143.411	144.566	138.01
LOC_Os01g38359	12.2184	10.7817	24.2931	20.1896	27.4641	9.29786	9.1683	22.3952	22.7659	19.6718
LOC_Os01g39330	2.81083	1.61821	6.50503	4.02237	5.21621	1.99165	1.41963	5.80568	4.09355	4.94952
LOC_Os01g39830	2.52815	3.89444	6.59682	9.4446	8.11086	3.00094	3.12314	7.13472	8.35776	7.10062
LOC_Os01g40070	33.6297	22.3985	12.9231	12.4968	10.8195	108.384	23.2512	11.4499	15.365	16.0095
LOC_Os01g40094	197.618	166.984	44.2949	43.9658	44.2909	219.97	191.094	44.1197	42.3278	44.738
LOC_Os01g40190	11.2825	5.5614	1.92337	2.63246	2.3771	8.07546	7.33878	2.27589	3.04377	2.41157
LOC_Os01g40280	16.6582	16.8814	3.97389	4.56259	5.86812	17.1448	19.1549	4.25624	4.32763	3.40502
LOC_Os01g40550	2.62551	1.48353	4.19468	4.5329	4.42823	1.78088	2.14776	4.17498	6.8292	4.52841
LOC_Os01g40870	12.72	9.07984	20.8471	19.1438	21.338	8.20655	7.29132	22.5494	18.3605	21.0872
LOC_Os01g41200	2.90378	2.97289	5.56825	4.6286	6.18426	2.34554	2.53715	4.28933	7.16176	4.61018
LOC_Os01g41240	124.977	109.372	399.694	400.131	338.046	130.374	142.725	413.49	368.982	454.7
LOC_Os01g41420	2.05531	2.0234	0.849727	0.571102	0.448275	10.579	0.48143	1.14133	0.637206	1.72237
LOC_Os01g41550	5.69681	6.32973	9.17341	9.56409	9.55292	5.60002	5.19082	11.1386	10.8265	9.83733
LOC_Os01g41720	2.1013	1.64979	0.35868	0.4906	0.40106	2.28302	2.00683	0.493952	0.618533	0.626873
LOC_Os01g41890	2.15137	2.15572	0.916586	1.00006	1.02859	2.53017	2.12639	1.14512	1.10095	1.18115
LOC_Os01g41990	0.807715	0.934696	2.40455	1.62427	1.65401	1.35248	0.544755	1.52554	2.0436	1.88365
LOC_Os01g42070	0.0501244	0.0651651	0.564119	0.591319	1.25501	0.133513	0.0631624	0.346391	0.935289	0.321365
LOC_Os01g42090	30.1455	27.6926	12.8895	14.6817	13.7221	27.5955	28.9727	11.7653	10.0858	10.0084
LOC_Os01g42190	187.79	222.918	95.0127	99.5402	94.8476	220.636	224.509	89.4939	86.7385	97.0439
LOC_Os01g42200	6.15824	6.06163	12.7572	9.25409	8.90334	2.85719	3.11633	11.2921	16.4199	11.4552
LOC_Os01g42294	15.5046	14.138	27.8949	33.9679	29.9807	15.3595	15.0247	28.9994	38.3084	31.3481
LOC_Os01g42410	3.54579	3.85469	2.76722	1.86244	2.32176	4.72834	4.78402	1.91526	2.05747	1.82787
LOC_Os01g42520	22.5848	17.9376	46.9841	32.2878	42.6076	26.8338	21.0367	33.1001	53.8687	59.7912
LOC_Os01g42690	3.31263	3.40236	0.647094	1.33609	0.68708	2.92745	2.3654	1.10865	1.47855	0.990232
LOC_Os01g42860	38.2363	34.0428	7.87407	9.24866	13.2164	31.4709	37.6855	8.21094	5.40493	6.3987
LOC_Os01g42900	1.76421	1.47683	3.40554	3.53566	4.83843	0.823242	1.16202	3.94231	5.72364	3.32444
LOC_Os01g42960	2.40442	3.12462	4.88425	6.57455	6.56798	2.33642	2.56309	5.28016	7.29208	4.83581
LOC_Os01g43140	1.56999	2.06277	2.91413	3.29386	2.61105	1.26178	1.59049	4.01067	4.17427	4.34811
LOC_Os01g43230	8.89783	7.67088	23.9704	20.1677	22.781	8.64038	7.40589	20.6824	26.2226	24.1185
LOC_Os01g43270	35.5907	27.2124	45.5829	39.0694	40.467	17.5887	19.4471	36.7197	38.1256	40.5131
LOC_Os01g43460	0.745489	0.596427	1.27733	1.28927	1.16028	0.612961	0.0761125	1.139	1.59142	1.62522
LOC_Os01g43590	2.3605	1.83066	5.43853	5.21237	4.53679	1.55364	2.02688	4.98435	4.88734	5.1616
LOC_Os01g43610	0.796845	1.63219	2.12126	3.59743	2.02775	0.876895	0.541446	1.91161	2.75897	1.76547
LOC_Os01g43740	7.02731	7.17781	2.86201	3.05841	2.58539	9.19631	8.98355	3.2463	2.81975	3.44255
LOC_Os01g43750	2.18143	1.32079	5.76853	4.20503	4.67469	1.18673	1.05358	4.36018	3.80734	3.57872
LOC_Os01g44069	14.2807	19.0083	25.4272	30.5974	27.9566	13.1537	15.0756	21.9442	33.3832	25.4671
LOC_Os01g44090	1.79155	2.70006	3.01756	4.25215	4.03437	1.79674	1.87481	3.69842	4.78303	4.82615
LOC_Os01g44110	2.99895	4.12728	11.5177	16.3572	18.0347	3.02756	3.50858	13.3909	17.7912	11.6245
LOC_Os01g44130	1.42583	1.74261	4.9169	4.92694	4.44705	1.45756	1.44699	4.48783	6.16401	4.47755
LOC_Os01g44250	6.41482	6.15537	2.18311	1.64344	2.66633	5.99776	5.42426	1.66225	1.78637	1.60139
LOC_Os01g44360	0.273384	0.452807	0.820774	1.37063	1.26154	0.507317	0.397406	1.04323	1.61931	0.860833
LOC_Os01g44390	42.8944	39.9439	98.6021	82.8895	72.6804	32.5945	34.3237	80.8023	72.0513	63.9394
LOC_Os01g45090	1.73908	2.54073	0.681903	0.228225	0.431863	3.07335	2.60003	0.732881	0.702382	0.736495
LOC_Os01g45110	0.742152	1.12486	0.89979	0.899234	0.757473	2.37906	1.61193	0.7891	0.947409	0.481123
LOC_Os01g45140	1.75373	0.948867	8.14732	7.47839	7.64283	0.882669	0.690494	6.4708	6.89114	7.82248
LOC_Os01g45274	616.548	605.018	1712.28	1760.17	1660.97	653.48	537.033	1653.34	1517.27	1715.39
LOC_Os01g45460	3.53625	3.07461	1.50634	1.43103	1.4102	3.73659	4.46649	1.48657	1.09555	1.33788
LOC_Os01g45470	3884.26	3060.93	1648.31	1353.28	1326.86	2728.22	2553.01	1863.8	1543.37	1499.82
LOC_Os01g45640	219.461	191.457	65.5578	43.8676	48.1168	220.425	263.71	58.8964	61.195	51.6827
LOC_Os01g45659	3.95537	2.42132	0.105932	0.489268	0	4.72653	6.57522	0.093216	0.11029	0.20347
LOC_Os01g45700	9.46415	6.97572	46.9984	48.4107	58.6261	6.73112	9.89965	45.507	68.8933	46.3835
LOC_Os01g45914	6.55566	5.97261	89.1216	91.0157	188.411	4.27048	1.89181	84.6724	49.0337	126.072
LOC_Os01g46080	25.5959	24.4282	12.4906	12.6633	13.1809	25.3612	27.9785	12.9896	14.0439	12.3399
LOC_Os01g46250	3.59494	3.19709	2.02471	1.0759	1.77205	2.47551	4.35422	1.34833	1.46586	1.8394
LOC_Os01g46340	3.81675	7.44231	7.97851	11.0244	10.78	4.05704	5.51554	11.0708	14.2009	8.27812
LOC_Os01g46350	4.52627	6.53897	10.3973	13.0055	9.53638	4.09384	5.42144	10.9647	12.7089	9.67354
LOC_Os01g46400	11.323	15.8128	19.9708	23.021	25.1261	9.72294	12.6976	19.1522	28.0992	19.295
LOC_Os01g46760	44.7372	40.3086	18.5783	18.4401	17.179	51.4849	43.0853	20.7093	19.6004	21.2014
LOC_Os01g46970	20.1065	15.3369	5.01185	3.6137	3.42553	19.6489	21.2304	4.40857	4.27868	3.5336
LOC_Os01g47050	0.470952	0.792817	1.25381	1.20768	1.26573	0.539875	0.482202	1.36564	1.72928	1.15942
LOC_Os01g47080	10.4818	9.87479	16.6867	19.0791	19.9276	9.12235	8.3406	17.0292	20.3287	17.6775
LOC_Os01g47256	119.979	112.511	109.156	110.772	98.181	129.662	126.141	110.259	101.173	118.54
LOC_Os01g47400	23.3393	28.6976	31.4011	35.4936	30.2471	16.9576	20.3051	37.0696	41.7459	26.2128
LOC_Os01g47490	138.188	131.015	46.507	44.5881	45.8237	113.434	139.654	41.34	39.8148	38.9883
LOC_Os01g47510	0.195015	0.391145	0.711819	0.690198	0.650573	0	0	0	0	0
LOC_Os01g47580	0.31659	0.171312	0.69121	0.96491	0.836509	0.132937	0.133059	0.195862	0.345849	0.23532
LOC_Os01g47635	0.230004	0.435608	0.698194	1.08225	1.05093	0.397112	0.306105	0.728291	1.27505	0.885802
LOC_Os01g47690	52.6332	50.9807	22.097	26.2895	22.9575	63.8824	61.5371	24.0793	26.5783	25.4381
LOC_Os01g47700	2.97937	7.70769	24.3744	25.6409	30.9597	1.7285	0.662679	18.4819	17.3628	14.9013
LOC_Os01g47760	112.452	78.9953	38.236	32.4057	38.7593	188.044	92.2574	41.4056	37.2643	42.4979
LOC_Os01g47780	79.9874	92.0071	225.895	249.365	259.913	73.9452	79.145	211.035	289.94	215.328
LOC_Os01g48446	9.08432	6.35833	3.5702	3.18027	3.04621	25.7164	6.35677	2.97605	3.5257	3.85835
LOC_Os01g48570	0.299149	0.195027	0.810066	0.756423	0.488652	0.180515	0.215641	0.530983	0.750716	0.455971
LOC_Os01g48620	2.48275	1.7476	3.65945	2.44684	3.01593	0.516292	0.42533	1.14949	1.08121	1.03751
LOC_Os01g48710	0.183363	0.1129	1.34367	1.43116	1.50071	0.381118	0.44708	0.916899	1.56069	1.18514
LOC_Os01g48940	6.1455	2.63663	0.892971	1.34417	1.23411	3.86992	3.47004	0.485612	1.05931	1.15895
LOC_Os01g48950	73.1976	41.6981	18.048	11.8603	19.4693	22.8775	23.6279	11.1238	9.12832	8.75245
LOC_Os01g49200	0.0935038	0.149339	0.697325	1.01463	2.07651	0.0294788	0.151712	0.540677	1.5727	0.336577
LOC_Os01g49280	4.12729	3.41488	1.91682	1.90704	1.46334	3.50747	4.16608	1.46902	1.38053	1.28219
LOC_Os01g49710	29.5942	24.4479	5.57172	5.48551	6.2035	24.3581	22.141	3.90683	2.89639	4.05119
LOC_Os01g49720	170.86	136.425	25.0379	19.7042	26.0634	142.187	133.83	19.6047	15.7969	20.1428
LOC_Os01g50090	1.53926	1.1856	3.16892	2.28938	3.48881	1.28449	0.823334	2.45338	2.25966	2.71563
LOC_Os01g50370	3.3972	2.72283	0.648268	0.457258	0.842001	5.12664	4.15521	0.75967	1.25263	1.00247
LOC_Os01g50400	16.8471	10.4986	0.822109	0.338491	0.332379	27.2513	18.4899	0.38382	0.247959	0.451156
LOC_Os01g50410	8.10183	6.88021	1.20615	0.666052	0.81682	44.1031	6.55298	0.820267	1.00513	1.47297
LOC_Os01g50420	3.71458	3.14053	0.258716	0.0993772	0.309813	27.1211	1.25126	0.329285	0.416042	0.541384
LOC_Os01g50450	56.795	53.3894	29.611	30.0231	29.9175	61.1296	63.1346	30.0025	30.0988	27.8614
LOC_Os01g50820	1.69985	1.23146	7.56564	8.56692	7.43569	0.744609	0.850633	6.5508	6.75707	8.74164
LOC_Os01g50890	3.89488	5.24373	1.89375	2.10855	3.11454	8.35378	17.2073	5.37321	7.28777	7.29382
LOC_Os01g50900	3.83391	3.94078	0.216456	0.502754	0.211398	4.73993	6.16382	0.188648	0.541689	0.408552
LOC_Os01g50910	135.483	72.0738	1.86971	1.78964	1.39159	107.466	178.421	1.56192	0.750706	1.47809
LOC_Os01g51030	17.5723	15.6443	7.40754	4.19309	4.0331	18.0957	13.2364	6.59178	4.75961	4.2883
LOC_Os01g51060	2.08725	2.02477	3.85295	4.28625	3.62742	1.43116	1.22188	3.30537	4.78942	2.70211
LOC_Os01g51260	0.412979	0.161893	1.03525	1.30598	1.51506	0.229431	0.25686	1.54559	1.3389	1.02899
LOC_Os01g51400	1.1861	1.66009	0.972074	0.857389	0.885691	2.2958	1.77991	0.994954	0.572986	0.775048
LOC_Os01g51420	18.8787	22.5093	11.0991	13.1509	10.7196	23.4682	22.6963	12.2098	11.5692	11.3123
LOC_Os01g51840	7.63051	9.98144	15.9098	20.5815	18.8042	7.49345	7.81592	15.6675	18.4272	14.2609
LOC_Os01g51890	7.58886	7.17234	15.1365	15.437	16.4255	8.09401	7.00422	16.3249	15.4979	17.1776
LOC_Os01g52110	132.995	142.017	79.2552	78.3401	83.3517	221.166	215.987	88.1478	83.4404	85.844
LOC_Os01g52140	0.748244	0.670789	1.41087	1.64713	1.41829	0.994387	0.74758	1.48556	1.51697	1.4625
LOC_Os01g52160	5.3122	6.75587	22.4027	23.9316	21.0031	5.42483	4.29644	18.4206	23.1086	17.3832
LOC_Os01g52230	41.1643	56.3128	11.1776	10.1779	10.6327	40.4581	39.1506	10.0806	6.73702	10.1692
LOC_Os01g52260	12.5407	12.1323	4.66133	4.17698	4.18885	11.2997	13.4103	3.92739	3.86291	5.98321
LOC_Os01g52570	8.69486	5.01956	3.02405	2.0951	3.22593	8.79354	3.68954	1.64849	2.25319	2.56778
LOC_Os01g52710	2.94106	3.23624	4.6502	9.38627	5.38079	2.73573	2.77211	8.01718	6.94041	6.73477
LOC_Os01g52730	2.86429	1.87863	1.0772	0.864958	1.28835	3.0057	2.52711	0.791289	1.12527	0.93704
LOC_Os01g52740	11.3027	9.72034	2.22096	1.1332	0.871349	12.2691	11.4767	1.38724	1.63429	1.22825
LOC_Os01g52770	1.00236	1.60244	11.9747	13.5749	16.9373	1.27231	1.16719	10.6339	18.1617	11.5704
LOC_Os01g52780	1.02013	0.948569	2.63987	3.43892	3.65495	0.739838	0.872137	2.50778	3.87803	2.82736
LOC_Os01g52830	0.676891	0.382975	0.154547	0.0362202	0	0.56617	1.86318	0	0.0319705	0.0582882
LOC_Os01g53060	33.3145	31.8609	61.4793	61.4946	54.8044	33.9141	32.7561	78.0362	70.5255	74.6611
LOC_Os01g53090	11.491	15.6126	0.342569	0.988319	1.4719	6.70302	3.43554	0.790281	1.00412	1.59113
LOC_Os01g53170	0.339682	0.459925	0.139712	0.17247	0.275166	0.555691	0.351125	0.209823	0.249314	0.410395
LOC_Os01g53330	12.2318	11.3812	28.6693	26.2717	23.8288	11.98	11.9513	29.8729	27.1339	29.4794
LOC_Os01g53420	4.22676	3.93649	7.21005	6.02683	6.09924	2.48691	2.77015	6.03189	6.70572	5.20225
LOC_Os01g53430	0.338268	0.325328	1.21365	1.01912	1.30388	0.0273717	0.0683572	0.324881	0.176284	0.394747
LOC_Os01g53640	1.40729	1.97412	3.1004	4.32857	4.13755	1.43452	1.43905	3.56144	3.91439	2.88881
LOC_Os01g53790	2.33367	4.23611	6.02896	7.61511	6.57147	2.33228	2.68515	6.29443	11.4665	7.01134
LOC_Os01g53820	2.20802	3.47192	0.57452	0.380897	2.31409	1.75415	1.87793	2.0021	0.468554	0.413345
LOC_Os01g53840	1.21198	2.02348	2.90115	4.02833	3.9944	1.24011	1.66233	2.77015	4.7939	2.61892
LOC_Os01g53880	13.4473	11.3573	2.84442	2.90686	2.65828	20.6987	16.5202	2.92687	3.06972	3.2521
LOC_Os01g54030	0.699209	0.957726	0.176109	0.15246	0.214589	0.849143	2.37238	0.216257	0.0237165	0.146096
LOC_Os01g54340	37.4898	31.15	13.1997	12.3805	11.3503	50.3161	31.9729	12.171	13.4536	12.8738
LOC_Os01g54890	32.0326	28.0606	18.118	14.8911	10.0028	27.7023	34.3293	14.9662	15.4367	21.3767
LOC_Os01g55000	33.4133	57.2334	91.7666	125.212	107.749	26.8502	41.0016	97.8169	123.866	84.4973
LOC_Os01g55100	6.56886	8.34663	3.26402	3.07086	3.95529	4.82431	8.1289	2.98462	5.35845	2.71464
LOC_Os01g55150	1.88447	2.71906	12.3036	15.1782	19.0488	1.60459	1.58392	10.4148	18.247	11.0189
LOC_Os01g55160	1.41195	1.27536	3.62426	3.28379	6.8928	0.741798	1.1151	2.43066	6.54695	2.37692
LOC_Os01g55190	6.38623	11.0756	18.975	20.8822	25.098	5.8983	7.42207	18.5622	30.8908	15.5471
LOC_Os01g55240	12.8356	10.343	4.72846	4.37197	3.01629	16.9714	11.4735	5.36889	5.60197	6.97408
LOC_Os01g55260	0.191172	0.22645	0.539907	0.780834	1.35794	0.180823	0.248572	0.541193	0.811365	0.581132
LOC_Os01g55370	1.78979	2.70826	5.03644	4.34123	3.79988	2.04937	1.45984	3.77686	5.47244	3.91174
LOC_Os01g55940	7.81999	8.34926	7.84916	8.59669	8.50169	10.8699	11.6371	4.73892	5.17249	4.5586
LOC_Os01g56380	22.1249	19.1005	10.1329	9.95071	7.61083	21.4959	25.5643	11.4224	10.6888	13.1951
LOC_Os01g56560	46.3544	50.1295	22.0673	21.981	23.8761	52.2834	51.548	21.5416	23.7177	24.5115
LOC_Os01g56690	1.60746	2.05674	0.126619	0	0	10.1599	1.84222	0	0	0.0847746
LOC_Os01g56870	0.259505	0.358825	0.815306	0.914389	1.03739	0.431882	0.280028	1.11562	0.783211	0.925524
LOC_Os01g56940	0.209656	0.242524	0.595984	0.600454	0.772591	0.232055	0.19731	0.380141	0.649389	0.345058
LOC_Os01g57020	9.99022	5.95947	3.7473	3.05807	3.34232	8.69304	7.72572	5.44965	3.64185	4.22366
LOC_Os01g57250	385.483	550.005	218.996	201.668	233.633	330.067	473.011	210.911	231.261	207.112
LOC_Os01g57370	2.15503	1.37705	0.0664691	0.26522	0.161395	0.341307	0.529902	0.0289463	0.0337958	0.0618551
LOC_Os01g57420	28.1908	30.5324	14.1262	14.0768	13.1417	33.1153	42.8736	13.1437	13.6945	11.5543
LOC_Os01g57450	18.2855	13.6064	4.14494	7.33272	7.07311	11.4561	12.0324	7.98744	2.41511	1.18969
LOC_Os01g57540	0.223781	0.299885	0.487473	0.460914	0.660408	0.159754	0.201147	0.466799	0.63373	0.310747
LOC_Os01g57690	1.55267	3.99087	7.06356	9.48063	9.33782	2.49642	3.41495	7.529	11.542	6.31042
LOC_Os01g57740	35.9845	33.804	17.3023	18.3221	16.3546	38.9386	39.5031	16.7812	18.9707	17.4017
LOC_Os01g57770	2.17831	1.53709	3.97928	3.27147	4.01734	0.920647	1.38134	2.82009	3.46998	3.33329
LOC_Os01g57854	4.07141	5.1297	2.26518	2.1499	2.35553	7.54529	6.07707	2.03382	2.31496	2.71761
LOC_Os01g57880	3.92555	3.42986	7.799	10.6953	11.9652	1.82513	3.50688	9.37165	11.1905	11.1649
LOC_Os01g58022	3.12293	2.27165	6.94971	7.69281	5.9143	3.91008	2.58326	7.53922	7.24302	6.96807
LOC_Os01g58100	2.91691	1.35946	2.99879	2.61683	2.8557	0.825205	0.861578	2.16759	3.32536	3.93402
LOC_Os01g58194	36.4648	29.2497	7.30334	6.52869	6.25678	31.951	35.5237	6.73088	5.92574	6.19634
LOC_Os01g58280	1.22517	0.780404	3.13816	2.15078	2.45297	0.552501	0.685292	1.91778	1.52529	1.28441
LOC_Os01g58550	11.2133	17.3006	26.0435	33.6432	31.4818	9.38227	11.3076	34.8523	41.5639	25.5943
LOC_Os01g58620	41.235	38.1692	15.8855	17.2017	15.343	43.5227	42.0765	16.5873	17.2768	14.8206
LOC_Os01g58640	12.0157	13.7666	3.91868	3.56208	3.60026	19.2588	17.3091	3.80187	3.72447	3.52116
LOC_Os01g58850	4.92477	4.17066	0.359828	0	0.176221	3.81551	8.32868	0.0780239	0.177193	0.25103
LOC_Os01g59120	0.324117	0.238198	1.66326	2.23436	4.07344	0.111045	0.116938	1.16856	3.37386	1.00478
LOC_Os01g59840	0.312551	0.233736	0.446249	0.840216	0.58591	0.358334	0.359132	0.642564	0.419441	0.922877
LOC_Os01g59870	2.90728	5.66567	47.4637	61.397	59.334	2.63834	3.38934	38.2611	64.0688	43.2383
LOC_Os01g60110	6.04242	6.35492	3.96241	3.77829	3.26226	9.27447	7.82503	3.90484	3.89707	4.3285
LOC_Os01g60330	1.68315	2.52452	4.71044	5.23538	6.41689	1.49649	1.63615	3.98071	6.83627	4.38908
LOC_Os01g60340	0.382549	0.495476	1.46608	1.50786	1.9603	0.467176	0.373815	1.33856	1.70739	1.58084
LOC_Os01g60600	3.05914	2.50199	0.861669	0.402023	0.545033	8.14408	1.80697	1.31094	0.85692	0.458042
LOC_Os01g60770	15.9744	21.7865	89.7327	66.4211	55.0632	11.407	7.62493	69.3161	84.9067	42.5289
LOC_Os01g60810	3.17449	3.45446	4.76888	6.29522	4.76408	2.13093	2.70248	6.51605	6.21669	5.00981
LOC_Os01g61010	14.1455	14.2562	28.3414	26.8054	22.4907	13.6257	13.6602	27.3207	29.6865	25.5824
LOC_Os01g61330	13.4477	15.5761	25.3067	29.7465	26.0116	11.908	12.9092	24.6335	32.5278	29.5294
LOC_Os01g61570	0.512821	1.10635	2.61122	2.29828	1.76895	0.668902	0.643522	1.95107	2.9033	2.14695
LOC_Os01g61610	0.197275	0.688177	0.539599	0.789917	0.671174	2.49978	3.02138	0.276771	0.450584	0.621304
LOC_Os01g61680	30.6911	23.7672	10.779	9.09734	10.3299	37.8149	26.0299	11.255	11.5712	10.3378
LOC_Os01g61690	0.104846	0.0912206	0.55905	0.306242	0.646794	0.126802	0.0872709	0.338821	0.556246	0.280009
LOC_Os01g61700	29.858	26.9467	6.01705	5.77949	5.13573	31.698	25.3166	6.04051	5.91159	7.52952
LOC_Os01g61900	3.89824	2.83305	8.66675	7.90637	6.1093	5.29415	4.78852	8.20833	7.88058	8.34477
LOC_Os01g61940	1.64667	2.38714	3.5427	3.90753	3.94682	1.42034	1.60246	3.12574	4.19216	3.22986
LOC_Os01g62060	31.9383	27.1997	18.0106	18.0564	18.5589	40.0076	41.1424	18.2302	15.9031	16.5455
LOC_Os01g62190	6.64826	4.91958	3.18032	1.35345	2.135	6.19549	4.96017	1.97486	1.25492	1.67688
LOC_Os01g62490	94.6667	74.7939	11.556	14.9931	14.1092	98.5132	118.764	14.3107	17.7754	13.7166
LOC_Os01g62600	11.0741	7.38073	0.0884983	0.103069	0.0432335	13.0731	13.8882	0.152234	0.173421	0.417899
LOC_Os01g62670	4.63965	3.238	1.91675	1.37354	1.4812	9.25448	2.7992	1.4321	2.14212	1.96193
LOC_Os01g62760	475.96	381.832	89.7326	91.6655	79.9082	430.433	506.971	93.7702	83.6277	90.3937
LOC_Os01g62900	2.66822	4.30246	2.16243	2.588	3.47795	3.26919	4.71818	1.92962	2.15846	1.71994
LOC_Os01g62970	9.31553	7.62912	4.88808	4.04418	3.76785	9.94415	11.7587	3.63197	3.49453	3.10357
LOC_Os01g62980	104.762	90.1073	31.4563	30.6691	26.6845	97.6309	108.541	27.322	23.2472	26.6814
LOC_Os01g62990	0.0856683	0.210917	0.446219	0.96587	1.09173	0.071857	0.220997	0.363106	0.94507	0.558173
LOC_Os01g63180	0.902528	0.425904	5.15981	2.64999	3.20884	0.626868	0.390699	5.1983	3.68925	3.46632
LOC_Os01g63230	20.4732	17.7602	9.68252	9.57446	9.26067	25.8091	16.3909	9.39181	8.92227	9.26433
LOC_Os01g63540	1.03884	1.25876	3.40664	2.97714	4.6384	0.935109	0.571579	3.10118	5.04916	2.6605
LOC_Os01g63580	15.7714	17.482	31.6109	39.9301	39.9045	12.5315	14.8045	33.0914	47.1871	29.2867
LOC_Os01g63620	81.7741	99.9372	146.27	141.105	138.574	81.7162	81.4456	184.144	168.947	163.657
LOC_Os01g63770	12.033	13.117	27.1401	27.8251	25.6774	11.7088	9.05489	24.3454	27.9612	22.8358
LOC_Os01g63930	8.19872	6.90798	3.68627	2.34659	2.51816	7.38521	8.05679	3.30058	2.41983	2.93325
LOC_Os01g64020	0.526609	0.566465	0.862229	1.08872	1.26109	0.855372	0.64444	1.21827	1.0316	1.19056
LOC_Os01g64100	2.29538	2.28769	4.58828	6.18831	5.19927	2.02648	2.19168	6.10093	6.80096	5.67736
LOC_Os01g64110	1.48607	1.04145	3.88611	2.93101	3.8019	0.692259	0.914405	3.6097	2.93893	3.90071
LOC_Os01g64360	39.4123	29.0464	6.87301	6.20012	5.24952	65.0472	50.5412	5.99401	6.08958	6.80734
LOC_Os01g64470	24.4506	21.583	9.52851	6.98568	7.08082	106.563	4.3036	7.50169	7.99969	7.54207
LOC_Os01g64640	12.2876	11.8382	33.8982	49.9359	87.8498	8.65323	9.81166	33.3342	75.2782	23.0858
LOC_Os01g64730	55.7421	48.7156	14.959	17.0221	16.0449	65.1183	55.3409	15.7666	16.0358	16.7753
LOC_Os01g64750	11.982	12.9406	7.23262	6.68768	6.99955	16.415	13.5825	7.27198	6.77878	7.45316
LOC_Os01g64860	11.9446	17.4091	20.2077	32.6369	18.2594	11.9149	13.3892	29.7346	28.6869	28.3941
LOC_Os01g65030	1.95228	2.00433	4.37914	4.28712	3.47379	1.8105	1.95706	3.73168	4.55821	4.00894
LOC_Os01g65370	40.918	29.2882	20.7112	16.2523	18.296	48.2261	36.9834	16.9004	22.7862	20.2354
LOC_Os01g65490	0.297278	0.429632	1.17261	0.926349	1.40047	0.299725	0.131094	1.01755	1.96747	1.35413
LOC_Os01g65550	8.58479	11.3609	18.6505	18.2193	22.3811	8.45884	9.80712	16.4157	22.2466	16.2141
LOC_Os01g65790	10.4226	14.8766	22.001	25.1502	23.4546	10.3829	11.4068	20.049	27.7679	18.6029
LOC_Os01g65880	24.6202	26.5431	67.7431	78.9669	73.3136	25.4281	22.9069	66.1665	72.6209	67.8563
LOC_Os01g66110	5.91691	6.74465	12.4335	13.4252	15.0042	7.02186	6.17944	11.6122	15.5625	12.045
LOC_Os01g66440	1.6624	2.72463	0.420202	1.06631	0.890853	1.78382	2.02155	0.689117	1.04672	0.698838
LOC_Os01g66490	5.20777	6.50718	8.37688	9.27613	10.1209	3.85573	5.2607	9.74413	10.7907	8.61204
LOC_Os01g66510	1.09004	1.33066	3.09258	3.0215	3.01373	1.47108	1.21847	2.87999	3.00944	3.08083
LOC_Os01g66650	1.28748	1.11526	0.985633	1.05144	0.919695	1.51983	1.23424	0.425446	0.710696	0.51869
LOC_Os01g66700	0.0975552	0.239217	0.472592	0.544544	0.677554	0.0707861	0.0243517	0.27213	0.56845	0.484785
LOC_Os01g66740	0.278556	0.264282	0.582474	0.339237	0.527338	0.139587	0.127894	0.371182	0.545375	0.52372
LOC_Os01g66890	9.61305	9.65062	21.1482	22.9667	20.2134	13.2579	8.82407	27.8963	24.2657	23.7166
LOC_Os01g67110	0.111492	0.714832	5.37698	15.8783	23.1623	0.227123	0	5.9306	17.1407	7.51543
LOC_Os01g67360	2.21538	2.01536	5.15135	4.62996	4.70537	2.30033	2.01249	5.26569	4.76875	5.51961
LOC_Os01g67540	51.4945	47.3457	7.37082	7.02243	6.74393	60.7362	65.5938	7.26016	6.75655	7.96504
LOC_Os01g67810	5.39322	3.864	2.63951	1.90952	2.23387	20.3282	1.29397	2.69382	1.78506	2.55471
LOC_Os01g67950	5.99581	8.46757	14.3568	13.8623	13.3328	5.65394	4.24406	13.3142	16.5118	10.1992
LOC_Os01g68140	0.551716	0.638506	2.37023	2.28116	2.82179	0.285186	0.643851	2.36518	2.54958	2.84281
LOC_Os01g68290	262.8	263.335	3.43742	2.26917	4.85829	295.74	402.923	2.88891	2.5735	2.67892
LOC_Os01g68540	1.40276	1.16516	0.25971	0.359212	0.628837	1.45283	1.94162	0.370507	0.643552	0.465255
LOC_Os01g68589	2.15964	3.24772	7.89261	10.1424	14.2187	0.937188	2.18678	12.1208	13.8339	9.88555
LOC_Os01g68598	0.911267	2.13815	2.69828	3.21172	3.79124	0.744648	1.06709	3.06952	5.5694	2.08327
LOC_Os01g68650	57.0129	37.1124	2.08903	2.84438	3.17394	47.1426	63.5523	1.89061	2.75066	2.84248
LOC_Os01g68720	5.67703	4.33246	10.7317	6.53113	8.82549	3.99684	2.84716	7.87046	6.86468	7.06079
LOC_Os01g68730	0.132414	0.180719	1.04133	0.677124	0.429013	0.276058	0.0347332	0.921071	0.836027	0.522386
LOC_Os01g68740	4.00357	3.1559	9.08955	7.18077	8.33605	2.04226	1.66339	8.00282	6.69586	6.22452
LOC_Os01g68890	13.5288	16.2494	22.3581	30.7592	28.7993	12.2762	11.4488	24.6824	28.6564	23.813
LOC_Os01g68900	4.01103	5.08603	9.20661	11.0505	8.66819	2.7742	3.68299	9.24806	10.7887	7.90836
LOC_Os01g68960	7.01342	10.6464	5.6653	7.28952	5.38249	9.74826	14.6128	6.85096	5.42038	5.0996
LOC_Os01g69100	274.24	253.008	102.743	98.5149	101.286	240.65	253.275	91.8191	87.8607	90.5734
LOC_Os01g69200	1.60048	1.33241	3.03975	2.58893	3.45917	1.3402	1.64912	3.27529	3.66353	3.1214
LOC_Os01g69290	2.09193	2.79601	5.80191	6.84892	8.2984	1.46005	1.88963	5.48549	9.7288	5.26103
LOC_Os01g70100	3.02362	3.65247	5.0805	5.61651	7.73142	2.51684	2.61012	5.28183	8.05035	4.94662
LOC_Os01g70310	12.2839	12.7052	24.6483	23.86	23.1702	12.5907	11.8548	24.5893	22.861	25.8599
LOC_Os01g70500	4.97317	4.42733	1.68556	1.72846	1.57411	4.63937	4.88846	1.52313	1.63517	1.45521
LOC_Os01g70560	0.0472842	0.245022	2.38158	4.5013	8.09627	0.182358	0.0593185	2.50256	7.3874	1.4483
LOC_Os01g70730	9.37712	9.18535	3.49186	5.30584	2.95522	10.9752	15.1435	5.12892	6.24349	6.4134
LOC_Os01g70930	17.9535	15.1183	46.089	41.6143	41.3897	10.4428	9.75915	53.7785	41.6251	49.4964
LOC_Os01g70970	0.0513054	0.115171	0.678607	1.79636	1.29697	0	0.10174	0.525645	1.4336	0.693271
LOC_Os01g71170	11.926	24.1402	42.8806	53.0995	52.084	13.766	12.9514	49.9678	68.3871	49.1664
LOC_Os01g71280	5.90414	7.47257	13.4453	17.7824	14.8328	6.11533	7.60294	11.9752	16.7705	11.5295
LOC_Os01g71310	4.62301	3.98929	8.60862	8.70192	8.13954	6.39299	5.70092	8.50728	8.90086	10.2186
LOC_Os01g71320	2.64693	3.51455	5.55225	7.15715	8.33778	2.63909	2.45531	5.40012	6.67863	5.89457
LOC_Os01g71474	15.0783	22.1143	32.1292	49.3084	30.6023	13.405	16.5564	42.054	36.8585	35.2764
LOC_Os01g71624	36.7289	24.689	13.3931	11.3999	12.9457	29.0226	31.0089	9.59736	9.07154	8.88557
LOC_Os01g71690	13.0492	10.1386	5.33557	4.15357	4.70716	8.55831	8.81474	4.15437	4.20607	4.83201
LOC_Os01g71810	2.43254	2.33304	6.67859	8.95152	8.78792	1.12817	2.04541	6.06276	8.6647	7.99061
LOC_Os01g71820	0.655761	1.33336	1.99116	2.86518	3.29315	0.545363	0.913154	1.44084	2.33129	1.66589
LOC_Os01g72210	3.32556	3.60626	1.37395	1.10491	1.34335	2.70488	3.21595	1.16447	1.13721	0.865788
LOC_Os01g72290	15.4884	20.0387	54.4988	83.333	64.1626	14.4361	17.8897	65.0108	87.213	62.0704
LOC_Os01g72330	1.95348	2.10655	18.5811	22.1583	21.2206	1.81547	1.99548	18.0126	17.167	19.4921
LOC_Os01g72360	3.05408	5.26841	0.448289	0.0861721	0.43993	15.5344	0.552763	0.458058	0	0.769934
LOC_Os01g72460	30.414	25.982	8.06685	7.46392	7.18607	25.5367	24.6981	7.62147	7.83873	7.42081
LOC_Os01g72510	0.852574	1.72845	1.9208	3.82317	4.87301	0.814763	0.887676	1.5545	4.03999	4.04658
LOC_Os01g72530	44.8011	27.1267	11.7011	9.01426	10.5371	167.235	15.6289	9.59189	11.8864	13.8304
LOC_Os01g72560	0.588005	0.530781	1.44278	1.20926	1.38669	0.867115	0.751472	1.12057	1.17729	1.09489
LOC_Os01g72700	2.78022	3.88085	9.15035	13.7571	11.4413	2.51889	2.28458	13.0975	15.0829	9.45247
LOC_Os01g72760	1.70221	1.80515	3.85668	4.11555	3.05782	1.002	0.978356	2.7512	2.46716	2.1943
LOC_Os01g72900	8.89829	7.86493	2.74793	3.88738	3.42458	10.7048	8.35767	3.35782	2.98515	3.71834
LOC_Os01g72910	3.42569	3.58175	1.2557	1.29766	1.54118	2.54896	3.97166	1.52977	2.20652	1.69513
LOC_Os01g73110	20.1341	15.9264	1.35402	1.58327	1.60702	15.0459	17.5025	0.72419	0.975231	1.73253
LOC_Os01g73940	682.028	539.076	1133.03	1165.28	1009.03	503.394	426.604	1173.15	972.473	1088.98
LOC_Os01g73980	13.8548	14.7054	33.8441	35.2979	29.9006	12.1369	13.6487	28.4891	40.8899	29.5816
LOC_Os01g74020	100.409	90.8285	157.431	160.717	156.151	77.0017	81.7423	195.213	176.106	200.672
LOC_Os01g74146	0.144303	0.165209	0.628404	0.875399	1.33528	0.399084	0.341653	0.523372	0.905146	0.788688
LOC_Os01g74300	610.318	578.378	1647.24	1742.98	1587.66	328.891	316.056	1423.39	1242.34	1396.38
LOC_Os01g74450	584.1	632.679	296.531	298.11	277.874	786.676	1002.79	381.675	327.057	351.994
LOC_Os01g74550	0.377593	0.41021	0.567692	1.09467	0.410066	0.153837	0.177806	0.301472	0.768265	0.511612
LOC_Os02g01140	0.446138	0.969698	3.10259	3.2278	3.94931	0.117691	0.69028	2.7634	5.34695	2.85684
LOC_Os02g01210	33.5	30.5606	89.1479	82.4283	74.3937	26.8293	21.8129	83.1602	69.3493	74.162
LOC_Os02g01590	77.1036	61.0174	2.78406	2.23398	2.26554	48.9089	69.7827	2.49471	2.9629	2.0847
LOC_Os02g02120	4.3677	2.97989	7.27013	4.69813	6.1691	1.99007	1.92008	4.73729	3.91189	3.97946
LOC_Os02g02400	399.017	355.018	614.382	661.307	591.994	277.841	236.188	590.504	520.848	544.476
LOC_Os02g02450	0.290714	0.522073	0.43066	0.669069	1.22147	0.174206	0.425809	0.886026	1.06131	0.675801
LOC_Os02g02460	1.2943	1.02665	2.95635	2.62596	3.16487	1.1437	0.9969	2.78181	2.64879	2.54642
LOC_Os02g02730	26.7276	22.7683	11.9754	9.2553	8.67814	31.0906	21.644	11.8324	12.3333	12.7512
LOC_Os02g02830	29.8896	26.0812	79.974	73.0429	70.4297	31.256	31.1856	97.0371	89.7365	80.2468
LOC_Os02g02930	1.78457	0.958956	0.62847	0.709991	1.02915	0.642992	0.828938	1.59154	1.3295	1.82789
LOC_Os02g03750	0.689177	0.785988	1.74007	1.05652	1.69317	1.00422	1.12164	1.25188	2.04217	1.89518
LOC_Os02g03790	3.18262	4.02934	8.62923	10.6731	10.947	2.7906	2.84245	8.90126	12.0172	8.11978
LOC_Os02g04130	6.30834	6.0507	2.05681	2.17354	3.25919	19.0507	5.14965	2.88762	5.51097	5.13076
LOC_Os02g04170	0.573054	0.350444	2.14395	1.59454	1.5577	0.565654	0.54124	1.88708	1.75875	1.87969
LOC_Os02g04369	24.8283	23.2502	7.27213	7.90685	7.78652	22.9384	29.4562	7.14245	7.07773	5.97455
LOC_Os02g04380	0.259631	0.278827	0.097852	0.121268	0.113795	0.26956	0.242714	0.0997494	0.0659175	0.107188
LOC_Os02g04540	0.2026	0.499717	2.78583	1.76586	2.56196	0.280116	0.333368	1.31626	1.83037	1.56311
LOC_Os02g04640	21.7364	20.6213	9.38612	8.89979	9.09176	26.8689	26.9727	10.106	8.59404	8.49348
LOC_Os02g04755	4.45571	4.61984	1.39406	1.85137	1.36342	5.63891	5.87518	1.27857	1.48055	1.49844
LOC_Os02g04760	14.7867	14.7969	3.21768	4.87818	4.59608	18.2532	18.1592	3.73551	3.17491	3.89103
LOC_Os02g04780	12.8804	11.3558	2.9941	2.60958	2.58412	10.7072	12.8196	2.7045	2.63628	2.47788
LOC_Os02g05040	0.103663	0.107585	0.317615	0.561084	0.571547	0.0868364	0.1236	0.402406	0.322165	0.359497
LOC_Os02g05940	0.107148	0.101274	0.264903	0.268935	0.393164	0.068992	0.0839106	0.151779	0.146617	0.250003
LOC_Os02g05970	0.0590625	0.125	0.253188	0.251862	0.280532	0.0619986	0.0827839	0.161778	0.187321	0.130655
LOC_Os02g06090	0.0608158	6.54e-18	0.188025	0.192794	0.143185	0.15812	0.000108604	0.282186	0.536922	0.287005
LOC_Os02g06140	0.0705331	0.125788	0.427323	0.535577	0.325888	0.118662	0.239456	0.520943	0.413372	0.583084
LOC_Os02g06150	0.443833	0.792438	1.97991	1.58306	1.46052	0.739615	0.370172	1.76017	1.49861	1.58451
LOC_Os02g06340	0.157119	0.363874	0.521687	0.867456	1.28633	0.14923	0.149219	0.352257	0.813178	0.320671
LOC_Os02g06520	39.439	34.8116	19.8127	19.8115	20.3997	40.976	40.803	19.9872	21.2049	23.4173
LOC_Os02g06560	61.8956	43.5506	14.0168	25.5094	27.3442	48.5302	33.9021	32.6804	30.9715	14.993
LOC_Os02g06930	5.62961	5.40169	2.40899	1.80514	2.71267	15.7979	3.52285	1.8803	2.2737	1.99932
LOC_Os02g07110	10.8015	11.4599	23.5122	21.1719	18.516	13.7295	16.4904	19.6476	21.7283	28.6891
LOC_Os02g07190	1.03993	1.53985	3.09794	2.90886	3.84205	1.0127	1.01881	2.21308	3.88131	2.34417
LOC_Os02g07370	0.102002	0.0512708	0.322517	0.164764	0.320828	0.316991	0.0493783	0.16734	0.253418	0.197292
LOC_Os02g07380	0.539661	0.229346	1.09077	0.939448	0.666897	0.472228	0.20786	0.33377	1.17007	0.592526
LOC_Os02g07730	3.83315	3.85344	3.11019	2.26334	2.77869	6.05523	6.87324	2.5912	3.28298	2.55799
LOC_Os02g07870	2.55857	3.38809	5.14464	6.36533	6.98434	2.78462	3.15321	4.43772	6.49191	4.92474
LOC_Os02g07930	27.0598	24.4976	9.29065	9.54341	8.37314	24.403	28.8993	11.2542	11.7388	12.8034
LOC_Os02g08220	0.55481	1.10256	1.8229	1.62052	2.49829	0.738819	0.754922	1.44541	2.31536	1.47869
LOC_Os02g08320	5.69723	4.3323	1.29019	1.07345	1.90943	4.23962	2.74081	1.94676	0.617825	1.87433
LOC_Os02g08440	44.1619	29.0613	13.0546	8.58464	10.2	123.472	25.4042	11.3493	10.6503	13.8298
LOC_Os02g09630	3.21077	3.84543	4.50135	5.85587	6.82456	2.72299	2.26921	4.77997	6.27676	4.58154
LOC_Os02g09740	0.653747	0.946299	2.13985	2.70208	3.47254	0.688586	0.722691	1.99528	3.16642	2.15087
LOC_Os02g09970	4.55602	2.46238	0.864695	1.53151	1.88223	2.94893	3.91599	1.9646	0.865859	1.29761
LOC_Os02g09980	10.3407	6.74569	3.91787	1.92897	2.85874	10.4349	6.09228	3.97445	4.0486	4.28638
LOC_Os02g10020	0.0329719	0.0564913	0.399812	0.785803	1.10984	0.0528142	0	0.515016	0.861035	0.415799
LOC_Os02g10030	1.57493	1.73896	2.36836	2.93889	2.85744	1.86156	0.364534	3.58133	3.17604	4.52596
LOC_Os02g10120	317.319	305.068	98.8275	90.9704	84.7395	328.584	363.601	95.2014	92.8766	99.9556
LOC_Os02g10490	0.192266	0.165688	0.46367	0.597869	0.854959	0.241228	0.182855	0.458685	0.768166	0.545024
LOC_Os02g10520	1.10122	0.902023	4.14414	4.60659	3.74114	0.769258	0.9735	3.38452	4.56319	3.61989
LOC_Os02g10730	23.7288	22.8536	11.8658	11.9959	11.7087	25.6724	25.852	12.0822	11.5915	12.3859
LOC_Os02g10760	3.24427	4.97078	7.61138	11.279	8.86186	3.52703	3.94232	9.80281	11.7891	8.37732
LOC_Os02g11700	4.73165	4.49807	10.0191	12.6502	8.3177	3.91486	5.25278	11.3146	11.3694	11.8797
LOC_Os02g11859	52.3924	46.7967	27.0149	15.0843	24.9677	101.537	21.0046	21.3545	18.3673	22.3051
LOC_Os02g11870	32.8806	24.0806	5.74375	3.3592	5.59718	21.4029	15.9387	6.78408	6.61804	7.20802
LOC_Os02g12080	2.08478	0.638646	5.13234	4.03206	3.76953	1.26529	0.345502	4.2748	2.12519	2.54879
LOC_Os02g12150	4.46914	4.66781	0.613653	1.02377	0.982305	4.08138	4.33388	0.648254	0.867701	0.817178
LOC_Os02g12480	131.82	112.142	268.572	262.114	257.243	105.991	92.5372	246.937	239.602	229.817
LOC_Os02g12730	3.97514	6.56252	9.76377	17.0009	12.1428	4.18389	5.09643	11.8762	13.0549	11.2155
LOC_Os02g12890	32.6976	26.5774	68.5052	53.1706	42.9831	25.6457	29.8347	78.3935	66.5892	57.032
LOC_Os02g13520	0.360577	0.351861	0.970458	1.19647	1.40773	0.251644	0.399142	0.879449	1.17769	0.869522
LOC_Os02g13620	6.08797	8.80649	3.6389	2.90254	3.47671	9.30701	13.3092	4.66251	4.33663	5.00904
LOC_Os02g13660	0.581915	1.25613	43.5473	16.8706	36.3137	0.547475	0.843923	16.6626	50.5858	10.5316
LOC_Os02g13800	23.4055	21.1673	0.742372	1.15497	0.824836	15.1335	30.3926	1.29455	1.38232	0.693621
LOC_Os02g13870	33.1574	40.8696	60.3699	68.7003	70.4321	24.8934	27.7417	56.3802	77.3346	55.7695
LOC_Os02g14160	8.1525	11.0241	38.7487	34.4341	41.742	6.70714	5.43585	29.5692	46.4091	27.3983
LOC_Os02g14280	0.857142	0.709352	0.447501	0.56148	0.658084	0.607765	0.442498	0.210328	0.210432	0.342634
LOC_Os02g14440	1.92149	1.33656	5.22804	2.42222	4.4258	1.1051	0.483718	2.73485	1.73296	2.76697
LOC_Os02g14490	0.532289	0.834213	1.38917	2.03606	0.986208	0.635632	0.471611	1.79591	1.45195	1.69329
LOC_Os02g14760	46.9747	51.8604	26.3477	25.6365	27.3307	48.8952	51.8496	24.2989	24.4103	24.7528
LOC_Os02g14910	1.07785	1.30014	4.53529	6.45703	5.87237	1.20552	2.105	3.80006	6.21031	4.45905
LOC_Os02g14980	10.7716	9.61311	4.2922	6.08509	6.50932	11.1182	10.5533	3.99634	4.40621	4.78345
LOC_Os02g15690	3.56136	4.943	6.15598	9.51697	7.21255	2.59389	2.53295	9.25138	8.35632	6.69698
LOC_Os02g15750	29.834	28.9713	58.2442	65.2627	56.7306	33.6499	29.5077	63.9047	60.3207	69.5686
LOC_Os02g15810	0.483077	0.527924	4.47978	6.64416	12.6384	0.189444	0.0700056	3.58219	8.89539	2.82422
LOC_Os02g15820	0.677058	1.23134	1.60391	1.82806	2.3846	0.813205	0.853156	1.54119	2.57899	1.27781
LOC_Os02g15930	3.36288	4.93543	1.51085	2.41519	2.18184	6.97234	9.99403	2.04858	2.45353	1.89241
LOC_Os02g16030	16.4921	17.7142	24.5776	30.4244	28.9835	12.2591	11.2126	26.9378	34.0812	25.5874
LOC_Os02g16500	79.4753	187.83	247.95	275.335	411.979	107.164	137.798	315.17	551.09	190.634
LOC_Os02g16690	0.486918	0.783306	0.403311	0.192718	0.149053	0.459836	0.962529	0.341513	0.59077	0.539488
LOC_Os02g16940	0.07166	0.0395889	0.999789	0.461309	0.479756	0.0549176	0.094645	0.562578	0.310436	0.193018
LOC_Os02g17680	2.87299	2.94722	5.43389	6.37347	5.55156	2.24574	2.37633	5.07364	5.51397	5.28388
LOC_Os02g17710	2.53398	2.22029	3.66207	2.81998	3.84693	0.899413	1.12036	2.29687	2.1263	2.15568
LOC_Os02g17730	0.556633	0.411976	1.09918	0.614264	1.04149	0.279702	0.526646	0.450366	1.36926	1.60488
LOC_Os02g17780	0.37827	0.441794	1.49616	2.04381	1.48806	0.606985	0.49831	1.96245	1.73182	1.91522
LOC_Os02g17940	3.48044	3.98279	7.33045	7.58355	6.93151	4.56832	3.25687	8.51926	7.64281	8.91159
LOC_Os02g18070	1.94874	1.88095	4.21069	2.59853	3.67093	1.22287	0.985599	3.18297	2.48713	2.43756
LOC_Os02g18410	4.0086	4.86143	36.0015	42.2113	52.1033	2.46574	3.4177	29.3947	55.7522	35.7717
LOC_Os02g18450	17.9527	17.6542	44.9873	45.8332	44.9361	23.7319	17.7164	49.5809	46.6042	54.0144
LOC_Os02g18540	3.61008	2.59895	7.05857	6.22746	7.21554	3.71099	3.05173	7.13323	8.95258	8.83992
LOC_Os02g19640	12.9636	15.0094	24.6241	27.8686	20.009	13.8976	11.2408	23.2875	28.6337	27.1723
LOC_Os02g20040	14.5047	13.6494	26.3035	27.8199	27.6985	13.8646	10.7177	25.2672	25.4202	22.7287
LOC_Os02g20540	14.2615	20.7569	48.2503	86.2406	54.2801	10.7079	10.4613	81.8627	67.1246	59.3822
LOC_Os02g20560	79.2779	96.5225	121.816	209.04	123.432	69.3398	78.7689	181.903	144.422	174.227
LOC_Os02g21009	2.71558	3.13512	15.1543	15.259	14.2678	1.72295	1.99178	15.3199	13.2366	13.3808
LOC_Os02g21090	0.678464	1.19245	2.08444	1.85049	2.1293	0.803853	0.707995	1.80391	1.83414	1.71937
LOC_Os02g21340	13.0264	10.7317	28.6342	21.0497	21.3658	14.64	15.5655	24.8432	28.8235	31.4276
LOC_Os02g22020	1.9855	2.6722	0.376477	0.552484	0.663518	1.58066	1.34222	0.177051	0.307363	0.127938
LOC_Os02g22570	0.0539606	0.0745705	0.154703	0.168558	0.178195	0.0770527	0.0307368	0.0941642	0.0765296	0.166453
LOC_Os02g24205	1.30937	1.78868	2.0737	3.63296	3.94571	2.3	1.55576	4.11247	3.44287	4.92453
LOC_Os02g24598	1.20806	0.890578	2.03703	2.82146	2.46491	1.24201	1.67271	2.17017	2.50518	2.38639
LOC_Os02g24700	0.45884	1.73457	3.87505	3.69794	3.68845	0.974786	1.29766	3.79033	5.89441	2.22753
LOC_Os02g26470	67.0824	67.279	11.5465	8.55408	10.7383	50.9356	81.5659	9.87064	8.57187	10.2777
LOC_Os02g26480	0.159201	0.186688	0.325911	0.799601	0.797174	0.406582	0.136767	0.257074	0.231797	0.314199
LOC_Os02g26700	159.89	226.073	92.391	112.811	109.093	191.287	250.024	96.441	110.548	114.872
LOC_Os02g28074	2.27523	2.13493	4.72281	5.79668	5.71658	2.01105	2.07345	5.40873	5.77578	4.73777
LOC_Os02g28220	2.18359	1.76333	0.533082	0.946397	0.596082	4.11276	3.76493	0.992496	0.611955	0.655443
LOC_Os02g28465	0.267112	0.33299	0.615093	0.583035	0.474825	0.568136	0.42687	0.634798	0.804867	1.27743
LOC_Os02g29640	0.130362	0.136847	0.360139	0.288673	0.333636	0.0934257	0.0761736	0.290476	0.14219	0.27595
LOC_Os02g30240	4.27943	5.14698	8.31905	14.8142	14.9795	2.47407	3.30973	14.0067	18.142	11.6471
LOC_Os02g30610	1.19695	0.69453	0.126698	0.127877	0.124239	0.540637	0.909661	0.113553	0.0589512	0.0477137
LOC_Os02g30800	0.193517	0.213797	0.384813	0.404417	0.551997	0.255698	0.211744	0.328352	0.386903	0.297099
LOC_Os02g30910	49.7731	47.3655	10.3948	9.80857	8.43216	39.7588	50.062	7.67804	10.2936	4.80353
LOC_Os02g31030	9.93861	13.8759	2.04743	5.55824	4.57108	9.29596	8.69467	1.97192	2.2236	2.2839
LOC_Os02g32450	86.495	65.6061	14.8511	18.8442	18.941	74.3362	81.0554	15.0473	14.3339	14.5751
LOC_Os02g32520	82.7422	72.4246	25.8545	18.0119	20.041	155.798	89.8512	22.041	21.6791	21.514
LOC_Os02g32580	257.211	179.4	25.0459	24.3682	25.083	441.948	239.931	30.8663	30.4359	30.432
LOC_Os02g32650	4.55767	4.86736	10.8942	11.8126	11.305	4.0572	4.41659	10.5044	13.834	8.11466
LOC_Os02g32850	3.13237	12.0393	4.50192	4.22893	3.43077	2.05767	2.56007	5.46419	6.16542	3.89647
LOC_Os02g32860	0.819946	1.11836	0.698929	0.70511	0.785117	0.751506	0.732681	0.280917	0.466707	0.298534
LOC_Os02g33330	155.877	131.089	70.4553	45.2957	50.7691	95.474	90.1971	72.1551	56.6759	52.6507
LOC_Os02g33380	76.4257	121.996	7.71946	14.2948	8.84417	87.077	133.749	8.73971	6.49484	7.91316
LOC_Os02g33550	116.909	123.576	206.697	253.035	204.562	92.6507	92.6366	216.144	225.443	215.67
LOC_Os02g33560	4.06376	6.99986	2.59172	3.17957	3.69762	4.39655	6.67732	2.79866	3.17643	2.26169
LOC_Os02g33680	27.7922	22.5755	6.55188	4.3897	6.41237	121.275	8.92062	6.05299	7.08534	7.23292
LOC_Os02g33780	1.71845	2.14494	3.55294	3.30364	3.48608	1.19999	0.926281	2.87485	3.58972	3.03069
LOC_Os02g34490	0.23345	0.318915	0.715986	0.966227	0.931543	0.300862	0.3898	0.646144	0.97633	0.824761
LOC_Os02g34600	74.4607	67.1389	29.4118	30.6712	29.7427	78.2787	73.2438	29.7441	29.6716	28.0123
LOC_Os02g34640	13.124	10.4856	5.78064	5.83084	6.34919	13.4542	12.3342	6.10652	3.97621	6.50488
LOC_Os02g34970	2.38372	2.53459	0.534869	0.362231	0.250464	3.47086	3.1505	0.404032	0.540975	0.648681
LOC_Os02g35180	0.754789	0.725876	11.7698	13.919	12.7714	0.636188	0.745123	11.9031	11.8868	11.3599
LOC_Os02g35230	0.0220623	0.139062	0.287818	0.433819	0.539603	0.0326848	0	0.36911	0.664112	0.266824
LOC_Os02g35329	19.4729	13.7368	1.98402	1.52597	2.04928	68.9946	3.46249	1.72419	0.929096	3.33688
LOC_Os02g35440	7.69797	5.2377	12.7971	8.83768	8.09317	7.24464	2.85086	10.5765	10.6785	12.6124
LOC_Os02g35490	0.726473	0.60675	1.11975	0.865226	1.00012	0.598401	0.403433	1.1139	1.05507	1.08824
LOC_Os02g35530	4.89089	5.95141	7.08229	8.1598	5.02152	4.48755	4.89245	9.96297	8.84661	9.02682
LOC_Os02g35660	2.39632	2.27088	4.78275	4.57848	4.00791	1.82749	1.43092	3.85667	3.57816	3.3228
LOC_Os02g35760	1.38157	0.958785	0.556726	0.526166	0.630029	1.46912	1.19317	0.620287	0.612926	0.690209
LOC_Os02g35830	71.4969	58.9356	26.6174	26.9692	27.5741	65.9919	57.291	24.9577	24.6659	26.7229
LOC_Os02g35970	3.72018	3.27023	5.35736	5.77267	4.47216	2.88919	2.36168	5.25038	5.48812	5.23399
LOC_Os02g36110	0.695558	0.251864	1.85596	1.57934	2.00805	0.587562	0.409165	1.50291	1.44657	1.57901
LOC_Os02g36140	0.876162	0.625834	1.65908	1.13566	2.46375	0.341263	0.590242	0.972328	0.897451	1.01421
LOC_Os02g36190	1.59222	0.799219	3.73003	2.41559	3.93951	0.604536	1.11899	2.81473	2.10423	1.81259
LOC_Os02g36210	7.87693	7.1028	12.7439	9.83115	13.8365	5.93299	5.97838	12.2192	14.3704	11.9216
LOC_Os02g36264	1.0643	0.951125	2.55686	1.91554	2.67842	1.2298	0.906924	2.57388	2.79532	2.35994
LOC_Os02g36490	14.512	13.5685	5.51453	5.05689	5.5547	15.9014	21.1517	4.80905	4.95933	4.0181
LOC_Os02g36500	1.07676	1.54925	3.97489	6.94516	5.93402	0.725152	1.0166	5.09904	6.21174	3.26774
LOC_Os02g36550	4.42816	4.79148	11.7806	14.1629	11.6847	4.95977	5.51295	10.6701	14.5816	12.5643
LOC_Os02g36590	51.0529	55.1019	123.191	111.559	114.461	53.4715	55.3455	137.631	135.07	132.106
LOC_Os02g36890	2.65371	4.17853	6.15332	8.15739	8.74761	1.47848	2.74079	5.6494	9.54731	4.96163
LOC_Os02g37309	5.81901	11.2278	3.84566	3.67102	4.40645	6.40048	11.0324	3.9467	3.60737	4.08033
LOC_Os02g38970	2.35238	2.72372	4.99245	4.69234	4.8002	1.94424	2.37165	4.08516	6.06973	3.86899
LOC_Os02g39140	2.74644	3.46031	4.16019	4.48745	3.68822	2.3801	2.26625	5.13167	5.07682	3.58781
LOC_Os02g39510	2.20783	0.743654	12.3144	11.7997	11.2898	1.00024	0.814307	12.2398	12.8002	12.3734
LOC_Os02g39950	3.80788	4.41884	2.92204	2.34737	2.55488	5.39641	6.14852	2.52275	2.33651	2.34224
LOC_Os02g40010	0.731566	0.902964	4.52098	5.85674	5.04731	0.646977	0.559822	4.33308	5.74671	3.66951
LOC_Os02g40260	9.26272	15.4936	22.4068	46.5806	31.4668	7.84677	7.37796	39.4831	34.0505	30.5588
LOC_Os02g40410	0.558061	0.878517	1.43525	2.36505	2.11574	0.893473	1.02993	2.31829	2.56458	1.78043
LOC_Os02g40440	1.22467	2.28327	6.72226	8.96443	13.6532	0.324091	1.16336	8.29874	15.9853	6.81283
LOC_Os02g40664	0.65161	0.760694	1.40984	2.14226	2.06258	0.532514	0.682311	1.48498	1.85803	1.46056
LOC_Os02g40900	29.1982	37.3004	12.7259	13.8025	15.6814	41.4125	54.5322	16.076	15.2792	14.6213
LOC_Os02g41460	2.99282	3.56224	6.39525	8.15614	7.39035	1.93632	2.63043	5.98592	7.54997	6.93041
LOC_Os02g41510	2.73602	1.9723	0.506241	0.469402	1.03463	8.09269	1.55505	0.440481	1.08369	1.23038
LOC_Os02g41710	2.24009	1.27458	3.27033	2.7422	2.51844	2.06828	1.56346	3.49366	3.75533	3.47409
LOC_Os02g41780	4.40811	4.99122	9.3983	10.8658	9.88596	4.30086	4.63237	10.6162	12.2911	10.2318
LOC_Os02g41800	4.80972	4.4918	7.45204	9.76953	7.6039	4.41713	3.29902	8.9978	8.91936	9.49596
LOC_Os02g41840	2.84698	1.97199	0.227098	0.198673	0.335724	2.62278	3.71881	0.20046	0.0590055	0.161052
LOC_Os02g41954	40.6275	39.3745	3.05045	4.73264	4.59111	36.7404	42.0806	3.65278	2.74643	4.3192
LOC_Os02g42380	1.47767	2.04615	5.38434	7.87347	9.53712	1.84547	1.73902	5.19178	10.1414	6.28783
LOC_Os02g42430	0.590589	0.358819	6.88199	7.77633	4.66778	0.418679	0.524715	6.00967	6.74472	7.10282
LOC_Os02g42560	0.122336	0.245321	1.26762	1.40749	2.95137	0.478584	0.361991	0.849195	2.05515	1.0638
LOC_Os02g42620	0.712362	0.525714	2.01982	2.01776	1.72057	0.876859	0.575827	2.05083	1.63635	1.82061
LOC_Os02g42650	2.78035	3.99667	7.19455	9.8044	8.13521	2.2066	2.05004	8.15115	11.7281	6.6137
LOC_Os02g42660	1.02566	1.64146	3.24715	3.42107	5.11115	0.769211	1.56506	2.95543	4.34718	2.5588
LOC_Os02g42940	12.6189	11.9242	6.78283	6.3593	6.43574	14.8328	16.0857	6.13903	6.18505	5.8061
LOC_Os02g43280	17.9662	22.7762	44.5543	61.1762	42.5001	17.7263	18.6861	50.1184	48.3724	48.9872
LOC_Os02g43290	6.36827	5.84582	9.02738	9.07865	8.65422	5.52631	4.44187	9.66163	8.13804	11.2553
LOC_Os02g43330	89.6709	46.443	0.470658	0.209853	0.321699	73.441	81.896	0.518817	0.655279	0.373322
LOC_Os02g43540	164.277	160.721	39.6755	47.6938	52.5713	112.783	108.495	48.0275	47.2617	44.4295
LOC_Os02g43560	1.65501	1.39332	0.568481	0.538216	0.867362	1.39823	1.12076	0.525279	0.660119	0.320761
LOC_Os02g43640	15.1675	14.8301	43.708	54.7598	65.812	15.7965	11.5509	40.0567	74.4975	36.6542
LOC_Os02g43660	13.9582	14.4414	31.6324	28.9431	38.6026	10.2395	12.7743	18.9168	37.1125	31.0921
LOC_Os02g43770	5.2109	2.67899	0.569729	0.732173	0.359405	7.06872	5.21585	0.613035	1.0886	0.804832
LOC_Os02g43820	4.4196	2.44369	1.04389	1.04421	1.21614	4.56091	6.00763	0.905938	1.23542	1.40745
LOC_Os02g43940	7.88023	12.9479	4.33415	5.33102	4.85298	8.37407	11.3952	5.23303	5.83458	5.18241
LOC_Os02g44108	2.22587	2.78153	13.9312	12.6838	10.8838	1.04612	1.63363	12.6528	15.2533	9.29374
LOC_Os02g44320	79.1029	134.203	289.933	459.242	330.132	63.6306	62.8225	399.843	404.234	300.668
LOC_Os02g44654	3.9953	5.17426	11.4844	15.6125	13.9603	2.83662	4.32142	11.6096	19.8157	10.9928
LOC_Os02g44670	1.77068	1.94592	4.45863	5.06801	8.16417	1.28062	0.988073	4.65131	7.02671	6.03218
LOC_Os02g44720	4.15727	1.81236	3.33059	4.37926	5.53604	2.89958	1.72593	6.16333	6.65558	7.65887
LOC_Os02g44770	0.986896	1.35696	0.366892	0.363451	0.398307	1.00469	1.47787	0.296235	0.319338	0.265866
LOC_Os02g44820	32.0032	33.5858	7.91851	8.96821	7.85455	25.6298	30.3149	7.91026	5.86601	7.66096
LOC_Os02g44870	263.156	153.931	32.6475	30.9364	34.4285	215.25	240.153	29.2439	32.7435	29.826
LOC_Os02g44940	28.2271	36.5233	55.2525	58.5137	49.1993	25.5445	28.4751	54.2111	63.0675	54.0018
LOC_Os02g44990	0.462258	0.387724	0.141659	0.256022	0.148618	0.764103	0.568795	0.190033	0.131642	0.166375
LOC_Os02g45010	0.349286	0.208961	0.767517	0.840547	0.6613	0.304685	0.22007	1.02306	0.65075	0.631302
LOC_Os02g45040	2.2438	2.66679	1.09383	1.06652	1.16669	2.59287	3.34103	0.898173	1.11587	0.66967
LOC_Os02g45170	3.92289	3.8333	11.2294	11.522	11.7303	3.71362	3.33126	11.3318	11.1096	10.4988
LOC_Os02g45420	1.095	1.02322	0.0892476	0.0347342	0.235075	3.1406	0.535796	0.105314	0.0930595	0
LOC_Os02g45620	1.69889	2.08367	5.36374	4.55119	3.70792	1.10994	1.4632	4.65924	6.39718	4.50686
LOC_Os02g45700	1.26942	0.912724	0.906398	0.71694	0.533047	1.20858	2.26292	0.644607	0.446887	0.573972
LOC_Os02g45930	57.4419	39.8799	20.3064	18.4481	17.4473	48.1957	54.3321	25.009	18.8023	24.1721
LOC_Os02g45940	2.93073	4.71388	28.4056	31.4064	65.503	1.74219	1.8161	21.914	53.8928	11.8122
LOC_Os02g46210	8.84399	9.43082	3.15381	3.82331	3.76383	6.96768	10.0786	3.37166	3.82843	2.87389
LOC_Os02g46460	13.0067	10.8758	6.29538	4.40102	5.06191	10.1985	8.99448	6.96358	7.59688	7.07498
LOC_Os02g46473	33.6738	67.6405	17.1691	17.8525	15.1384	33.2894	51.412	17.7933	18.9216	17.5098
LOC_Os02g46620	17.3468	22.4192	10.0642	13.1437	9.67314	40.7275	22.1477	10.087	13.4738	14.6084
LOC_Os02g46680	3.24752	4.71137	8.37856	9.51108	11.762	2.48116	3.88117	9.10698	12.6133	6.44261
LOC_Os02g46690	1.3142	1.2616	0.497098	0.799374	0.748021	1.23178	1.16935	0.616844	0.587202	0.418653
LOC_Os02g46910	4.65643	4.61011	11.4714	18.8607	19.8759	5.90137	4.19047	14.3945	18.4845	14.2947
LOC_Os02g47130	0.245076	0.332818	0.993491	1.51254	2.44756	0.284216	0.185008	0.877896	1.81023	0.795903
LOC_Os02g47320	25.3031	23.8091	12.2274	10.769	10.6914	25.7596	28.0776	11.9775	11.6212	10.0406
LOC_Os02g47330	1.83979	1.98324	2.25207	0.66766	0.832501	1.42531	1.94943	0.729008	0.762522	1.20898
LOC_Os02g47420	3.85037	7.67316	9.60855	12.764	13.4535	4.41724	5.41115	11.2943	14.9784	8.94975
LOC_Os02g47470	10.5502	7.65294	2.10023	1.57177	2.31211	29.1028	5.60003	1.92139	1.82321	2.18132
LOC_Os02g47790	0.768528	2.01938	3.16596	4.85508	3.52344	1.47466	1.52783	3.91848	5.33624	3.38433
LOC_Os02g47840	31.2536	26.9361	9.80727	8.9674	11.1439	23.4834	32.9015	8.55286	8.39573	9.87849
LOC_Os02g47920	0.0422123	0.178463	1.55114	0.824809	0.85766	0.123392	0.0505835	1.26131	0.615455	0.591353
LOC_Os02g48170	7.40426	7.13327	4.40065	3.93202	4.25095	7.48302	9.11976	4.02819	4.36982	3.43273
LOC_Os02g48450	0.516698	0.656149	2.48754	2.27136	2.37497	0.323713	0.448626	2.0416	2.2224	1.84342
LOC_Os02g48630	21.9799	19.3175	15.0989	11.6959	11.5774	26.5818	26.3455	12.463	12.8142	11.7751
LOC_Os02g48770	6.86859	7.1199	11.4066	8.8301	8.94058	5.09671	5.22581	18.5473	12.5396	10.7836
LOC_Os02g49480	0.321777	0.792976	1.37396	1.43276	1.91131	0.368377	0.429027	1.14547	1.82457	0.930555
LOC_Os02g49555	0.214647	0.183037	0.482821	0.46336	0.383034	0.247809	0.193075	0.492362	0.484547	0.454951
LOC_Os02g49680	23.6979	21.7247	46.8193	50.0867	42.5147	26.4115	24.5179	54.2422	49.118	51.3008
LOC_Os02g49850	6.19322	7.59071	12.6895	12.1882	13.5111	4.23764	6.74262	10.594	13.8376	13.2977
LOC_Os02g49860	12.3259	9.76075	6.52501	4.61626	4.01854	14.3337	15.0916	3.96104	4.20008	3.42449
LOC_Os02g49950	1.33528	1.49875	3.37347	3.91675	4.30591	1.15024	1.09999	3.00729	4.22329	3.01761
LOC_Os02g49986	11.0377	6.2259	1.39918	1.57425	1.62039	5.97347	6.53195	1.51309	1.32434	1.59555
LOC_Os02g50000	2.86503	2.36855	6.66133	7.7784	7.51501	1.85873	1.59563	7.83537	12.3282	4.6096
LOC_Os02g50040	1.47994	2.53047	5.36949	8.63758	9.03953	1.64922	1.74624	6.54808	9.76714	6.43827
LOC_Os02g50240	256.85	210.321	448.616	384.177	374.023	183.73	195.028	411.656	387.264	349.224
LOC_Os02g50330	1.60657	1.37002	3.40199	2.53401	3.65806	1.19197	1.062	2.6724	2.61974	2.43436
LOC_Os02g50340	2.77811	1.61733	1.04801	1.38382	1.26859	1.92963	2.77839	0.847816	1.20578	1.55528
LOC_Os02g50350	28.9273	33.3241	20.1221	18.4072	18.3712	35.74	44.1504	15.3947	15.166	14.666
LOC_Os02g50404	3.12297	1.5501	0.812932	0.55467	0.580555	0.928646	0.826652	0.833999	1.0444	0.667968
LOC_Os02g50470	7.79615	4.80259	7.58247	6.02788	7.5123	3.78286	3.35811	7.73254	6.80338	7.26513
LOC_Os02g50630	0.100681	0.247982	0.272432	1.2082	1.50693	0.0926299	0.169675	0.710905	1.1238	0.634546
LOC_Os02g50690	4.17976	2.68921	1.79532	1.63532	1.60145	3.67641	3.67543	1.06014	2.12534	1.69269
LOC_Os02g50810	15.1953	19.3707	31.4805	37.1392	32.6654	14.8713	17.3463	35.371	40.4961	32.5227
LOC_Os02g50910	0.220499	0.283212	1.02512	1.1621	1.72663	0.191079	0.158919	0.642341	1.19274	0.388805
LOC_Os02g51040	16.1081	30.4545	7.51825	8.86447	9.83585	15.7867	31.3334	10.5	15.2875	7.55969
LOC_Os02g51060	1.77486	2.00403	6.75258	5.99186	6.34656	1.52615	1.80302	6.1757	7.10427	4.93914
LOC_Os02g51110	7.02303	8.40759	5.14084	5.39467	4.85423	10.0758	11.5617	4.5182	4.80098	4.93205
LOC_Os02g51320	1.91441	3.96919	5.4007	6.26133	5.79204	1.26545	2.47098	5.54978	6.75385	4.63253
LOC_Os02g51620	1.56106	2.54517	5.85093	7.86283	7.40189	1.95055	2.0009	5.84102	7.9491	5.5888
LOC_Os02g51680	0.58586	0.715121	1.36132	2.28208	1.99161	0.892384	0.731736	2.63236	2.41363	2.34464
LOC_Os02g51720	2.21882	3.37981	6.16262	7.24574	6.77664	2.30426	2.60938	5.72639	9.84689	4.39411
LOC_Os02g51750	38.2938	42.9261	9.63827	12.5739	13.4986	32.4218	51.4364	9.92281	9.4432	8.47812
LOC_Os02g51860	4.22847	4.84708	8.39046	9.72194	8.50475	4.39257	4.24204	8.18395	10.6612	7.36239
LOC_Os02g51890	2.23005	2.2948	1.33116	1.07955	1.22313	3.15883	3.47764	0.833999	0.877765	0.722387
LOC_Os02g51900	0.57477	0.389557	2.12887	1.86496	1.78257	0.87727	0.629576	2.11012	2.01179	1.79129
LOC_Os02g51910	0.0951053	0.148111	0.753175	0.632255	0.53435	0.199419	0.371974	0.680168	0.728114	0.503998
LOC_Os02g51930	16.4822	11.4048	12.3305	5.39563	5.93355	14.5574	13.6305	5.70809	5.58434	6.03373
LOC_Os02g52010	16.9264	10.5583	4.36798	4.60114	4.39245	30.7669	4.62142	2.83468	3.80304	3.04744
LOC_Os02g52040	1.82098	3.05777	8.33648	12.9015	17.5334	2.80149	3.48554	8.45196	25.6971	13.6506
LOC_Os02g52150	18.8063	45.9273	13.0678	13.7854	19.4931	48.304	116.608	16.2226	21.3926	21.8366
LOC_Os02g52210	36.7833	32.6544	4.79036	3.8985	5.18559	77.5031	40.8132	3.6598	3.83212	5.22457
LOC_Os02g52280	2.56441	3.94746	5.84769	6.33013	7.15371	2.80052	3.22265	6.01294	7.71817	5.91205
LOC_Os02g52550	17.8698	21.9542	32.2028	31.4358	33.3569	10.5389	10.5937	21.751	28.1298	20.0206
LOC_Os02g52670	11.463	10.1048	2.16974	3.57748	2.18142	31.4111	6.61301	2.65471	2.94732	2.42157
LOC_Os02g52780	108.846	90.911	16.9338	17.9248	19.3987	111.552	108.593	18.8135	18.2988	16.786
LOC_Os02g52930	0.622603	0.386011	2.3154	1.14232	1.44359	0.598968	0.373676	1.64366	1.99447	1.5705
LOC_Os02g52934	2.24237	1.74365	2.79058	3.95303	3.72569	2.06887	1.18088	5.16614	2.92599	4.72686
LOC_Os02g53000	1.11685	1.10093	3.01667	3.2727	3.91117	1.57458	1.17689	2.44268	3.29144	2.97328
LOC_Os02g53130	3.82602	3.2621	21.8619	19.313	18.7443	3.30702	1.33056	18.3283	17.0058	25.2251
LOC_Os02g53200	9.73036	14.1996	20.1478	28.3585	24.8473	9.43444	13.0341	19.2665	26.6654	23.972
LOC_Os02g53320	14.5218	14.108	5.71764	6.31172	6.38261	16.3552	24.3017	5.51969	6.68356	5.14822
LOC_Os02g53360	0.422909	1.16434	2.43789	2.47999	4.21951	0.19717	0.665708	2.6945	3.09979	3.42618
LOC_Os02g53410	26.0657	28.1452	12.4924	8.68803	9.7836	31.3339	21.5181	10.1075	7.52098	8.83664
LOC_Os02g53510	14.0113	15.6297	28.3914	25.7995	25.4579	11.3236	10.9706	31.3011	32.0128	29.8864
LOC_Os02g53530	12.6726	13.6172	39.7598	35.8751	35.7523	12.9191	12.9442	39.6904	38.3022	40.8404
LOC_Os02g53840	0.922207	0.357464	2.7736	2.48043	2.53474	0.762738	0.202422	2.19795	2.13246	3.72038
LOC_Os02g54060	7.32158	7.93549	14.0151	24.6789	17.1763	7.93831	8.03875	15.0243	15.0182	18.3599
LOC_Os02g54140	70.468	95.9223	27.7322	28.5006	33.6242	82.6497	167.617	27.6255	30.1649	26.8469
LOC_Os02g54190	0.314257	0.0467294	2.66436	3.03175	3.2391	0.259812	0	1.62777	3.60221	2.47968
LOC_Os02g54254	16.3852	17.6993	7.90485	8.44421	8.15894	20.5829	21.8351	7.1343	8.25055	6.96581
LOC_Os02g54280	0.0427669	1.25342	1.20547	1.97109	2.11375	0.844648	0.0735179	0.373194	1.00866	0.24208
LOC_Os02g54640	5.89809	4.77446	8.66418	6.80542	6.81729	2.76587	3.80104	7.85452	6.48774	7.59471
LOC_Os02g54820	55.0902	38.6966	18.8178	19.8986	16.185	68.3947	55.6598	20.2976	19.4008	18.2463
LOC_Os02g54830	2.92683	4.46603	6.62805	6.30339	5.4923	2.37204	3.48646	6.68588	8.16742	6.00897
LOC_Os02g55134	83.6406	78.2405	25.7896	24.7982	24.7953	71.857	79.4594	25.496	24.122	25.4636
LOC_Os02g55190	0.0759385	0.221701	0.925849	0.74414	1.94332	0.102829	0.260529	0.686974	1.31956	0.132162
LOC_Os02g55250	12.5094	10.5612	4.89135	5.25816	4.48775	8.35208	9.99798	6.00667	5.82836	4.6666
LOC_Os02g55410	0.170572	0.320822	0.732685	1.18834	1.644	0.126719	0.0389883	0.527609	1.3261	0.41702
LOC_Os02g55870	1.62769	2.10197	8.41673	9.4192	9.22763	1.71958	1.78554	7.4591	10.6426	6.41553
LOC_Os02g55890	0.855839	0.976315	0.412085	0.448908	0.549677	1.06799	1.06271	0.471517	0.409792	0.564364
LOC_Os02g56120	1.85798	1.92318	0.263991	0.304048	0.566703	2.22859	3.13251	0.538287	0.323711	0.456661
LOC_Os02g56490	0.110338	0.477832	1.21836	0.891108	2.28474	0.184711	0.360966	1.49395	2.32524	1.07008
LOC_Os02g56510	1.19517	1.1603	2.22051	2.50474	2.57555	1.44019	1.02814	2.27203	2.54832	2.03695
LOC_Os02g56540	0.0205319	0.114776	0.720427	0.928492	2.30173	0.0349992	0.0179341	0.470078	1.39044	0.60872
LOC_Os02g56860	0.734285	0.985213	1.3016	2.13868	1.78652	0.421419	0.848187	1.58737	1.89325	1.77307
LOC_Os02g56900	158.913	197.525	92.7676	83.5027	103.218	285.677	291.528	93.1243	108.543	110.069
LOC_Os02g56920	20.3727	27.338	45.919	74.1284	50.7247	18.0506	23.5615	50.4737	53.5157	52.5626
LOC_Os02g57110	12.1408	14.6345	86.772	92.6952	90.2406	9.61279	11.9233	89.5219	134.235	55.7614
LOC_Os02g57140	0.428321	0.899641	1.55614	1.83425	2.25219	0.429297	0.666362	1.40394	2.51826	1.08028
LOC_Os02g57280	116.46	105.726	35.9555	36.1915	35.6231	129.082	144.157	35.0844	33.4033	33.4946
LOC_Os02g57560	5.23464	4.46695	6.67836	4.65804	5.01746	2.77053	2.93506	6.09578	6.0325	6.44674
LOC_Os02g57840	52.6894	34.844	1.50765	1.78184	1.85012	40.3948	45.2895	1.35325	1.82258	1.54631
LOC_Os02g58170	1.79022	1.70697	3.03274	3.37148	2.97213	1.37685	1.30932	2.93002	3.14932	2.8805
LOC_Os02g58220	0.939664	1.99001	2.16863	4.02563	4.76766	0.765425	0.981419	2.00382	4.05096	2.34885
LOC_Os02g58390	2.48736	3.25803	4.97505	6.34704	6.77164	1.29977	1.74379	4.16508	5.47186	3.17287
LOC_Os02g58480	0.88868	1.0071	2.47587	2.35602	3.1398	0.994249	0.98333	2.12848	3.21595	2.319
LOC_Os02g58530	1.03091	0.800624	3.04794	2.38715	2.90122	0.75426	0.670441	1.71217	2.72559	2.27378
LOC_Os02g58720	9.73025	14.612	33.1197	54.2366	40.476	9.94107	12.8071	48.0009	41.0119	39.6795
LOC_Os02g58740	2.39777	3.44273	5.71089	4.58229	7.62691	1.70101	3.05466	5.11173	10.176	6.32062
LOC_Os03g01300	31.2738	22.039	60.1514	94.8448	68.1513	17.6463	14.1927	44.572	56.0369	57.193
LOC_Os03g01320	17.7306	14.3691	59.8619	55.1036	64.5093	12.5056	10.0993	45.0759	57.9412	51.7647
LOC_Os03g01330	2.97554	1.90354	1.49015	1.02975	0.814329	3.21374	3.46955	1.09354	1.06466	0.988867
LOC_Os03g01530	10.249	8.68443	15.1361	16.8886	25.1811	9.32701	9.22389	14.4505	19.5022	12.5624
LOC_Os03g01800	29.6629	37.4344	78.0431	76.1808	56.4217	21.6284	21.9747	60.7359	85.2088	43.9636
LOC_Os03g01820	17.1951	14.2778	7.98027	11.3897	7.27222	15.3606	17.3535	7.3621	8.7289	6.66185
LOC_Os03g01880	11.4513	7.86311	4.39144	3.78581	3.48539	14.5376	11.1325	5.7662	4.91817	4.59701
LOC_Os03g02040	40.4707	43.0055	97.7455	122.057	109.075	34.878	36.5977	89.0204	111.757	101.623
LOC_Os03g02050	17.411	18.2207	2.32827	2.72115	1.88564	16.1276	39.1468	1.78555	1.99421	2.67974
LOC_Os03g02240	9.14314	11.8635	17.1783	27.1927	17.9141	9.72428	11.1145	21.876	25.1449	20.9379
LOC_Os03g02260	22.27	29.3337	15.6211	16.3056	17.3333	25.2355	37.0409	15.3802	16.6404	15.1872
LOC_Os03g02280	2.09723	1.96933	3.4227	5.352	4.21441	2.02913	1.70776	6.76309	5.89341	7.65351
LOC_Os03g02290	0.0767865	0.119214	0.418219	0.515058	1.12261	0.0332092	0.133149	0.307342	0.788074	0.274529
LOC_Os03g02390	49.4874	41.7364	24.8297	22.0382	21.7238	62.7446	50.4263	27.5055	26.7239	26.8219
LOC_Os03g02400	0.549273	1.33285	2.42982	1.95105	4.08517	0.561384	1.09727	2.68159	4.06038	2.37553
LOC_Os03g02610	4.11583	3.7192	5.0224	4.62695	5.84646	2.66411	2.52254	5.70523	6.2726	4.56822
LOC_Os03g02740	0.116904	0.12625	0.311664	0.783854	0.658461	0.0816814	0.14463	0.367948	0.67186	0.388492
LOC_Os03g02750	4.85069	5.42576	12.0313	14.6147	14.5804	3.95006	4.17884	11.4161	18.4491	11.2563
LOC_Os03g02820	0.520261	0.78806	1.11372	2.04337	1.76634	0.494344	0.479068	1.72369	1.66599	1.45033
LOC_Os03g02920	11.8429	14.4893	31.6807	37.1896	37.54	10.0862	11.0766	29.0707	39.2717	27.62
LOC_Os03g03350	1.86038	2.53102	4.68162	5.95841	4.12177	1.22497	2.27692	4.37154	5.41162	3.28869
LOC_Os03g03370	73.0018	45.1735	11.3959	10.2604	10.1347	55.3342	52.9152	8.91408	9.40959	10.227
LOC_Os03g03510	23.7386	21.7991	15.3696	14.5025	13.9787	32.6067	22.644	14.2888	13.6484	13.8008
LOC_Os03g03570	0.628503	1.25359	1.76056	2.19173	2.71647	0.56769	0.764439	1.93204	2.98064	2.00181
LOC_Os03g03630	0.720474	0.154378	3.1797	4.02503	7.08585	0.285309	0.466049	2.45051	5.21031	2.27368
LOC_Os03g03790	10.0033	9.96507	16.9484	17.171	14.5677	8.00584	8.2765	17.7908	16.0331	18.0986
LOC_Os03g03810	153.105	143.325	9.11905	14.4856	11.8403	89.0483	122.375	10.8923	7.82014	8.05301
LOC_Os03g03980	4.96729	4.78986	2.08487	1.40443	2.99216	5.07605	7.82098	2.13101	3.01468	2.04696
LOC_Os03g04080	2.30036	3.6322	0	0.119505	0.606144	1.87655	12.2518	0.0907884	0.213551	0.295522
LOC_Os03g04130	6.82026	7.35098	1.70753	1.6872	1.79977	6.58719	9.07185	1.65063	1.62654	1.28786
LOC_Os03g04220	7.95328	15.1396	28.0729	39.7167	54.7667	4.90292	8.93269	23.8717	44.5622	34.4818
LOC_Os03g04240	7.26028	16.6625	17.1086	23.494	33.127	4.65861	11.9964	17.347	30.6502	23.0337
LOC_Os03g04250	0.441195	0.888968	3.14387	4.85064	7.84189	0.801083	0.568204	3.19839	5.23983	6.28733
LOC_Os03g04470	110.781	96.262	176.617	189.879	175.434	105.795	99.2589	218.683	187.221	230.651
LOC_Os03g04530	1.01111	2.14729	4.83397	5.32349	11.1549	0.563599	0.988417	3.69501	10.9132	2.77888
LOC_Os03g04550	0.402558	0.420833	2.37528	3.74882	5.39522	0.4382	0.707299	2.03585	5.05439	1.69516
LOC_Os03g04570	11.6415	10.5097	18.4519	18.4755	18.6549	7.75542	9.28716	15.5681	17.5716	17.5468
LOC_Os03g04680	22.5725	26.2386	39.2374	41.0726	37.5494	20.6175	15.2607	39.3968	43.5589	30.8151
LOC_Os03g04710	18.487	17.3349	44.0772	44.0443	37.5661	26.4636	11.9251	52.4737	50.8839	48.459
LOC_Os03g04720	0.228804	0.182671	0.774727	0.631183	0.6337	0.177302	0.106287	0.317256	0.548056	0.254993
LOC_Os03g04770	117.424	98.2708	31.2644	31.2945	28.1942	165.993	139.756	33.0279	29.97	35.343
LOC_Os03g05210	2.58803	2.92352	1.46774	0.857256	1.21449	1.97913	2.54424	1.39708	0.911473	1.80395
LOC_Os03g05250	0.77189	0.118861	0.617179	0.824949	1.14669	1.23526	0.696978	0.861461	0.116519	0.814891
LOC_Os03g05270	5.06879	5.06661	10.579	11.5855	9.07791	5.19469	5.39813	10.7252	10.3426	8.88753
LOC_Os03g05280	22.3708	22.3093	12.0895	12.2742	13.0691	26.4271	23.2712	10.5363	11.0441	10.5027
LOC_Os03g05310	65.4289	58.978	28.8955	27.2083	24.722	84.4825	78.775	32.6365	33.0376	32.0532
LOC_Os03g05440	2.53073	2.37651	0.810502	0.751464	0.45699	1.69026	3.26261	1.23073	0.824883	0.677513
LOC_Os03g05520	11.7929	13.8262	29.0641	31.4113	47.9928	9.86503	9.60102	21.9938	41.8658	22.8744
LOC_Os03g05530	0.692258	0.968227	9.11899	7.19559	7.60816	0.917767	0.795293	9.55522	9.30076	8.74903
LOC_Os03g05560	4.33444	3.38803	5.86523	5.62917	6.06927	3.83748	2.14683	6.26301	6.33232	7.51715
LOC_Os03g05840	3.12031	2.23842	2.37624	1.72495	2.29053	3.93132	2.84237	1.19109	1.76166	2.10845
LOC_Os03g05900	5.54811	4.83671	2.60591	2.29918	2.72255	6.08198	5.62118	2.19798	1.80541	1.83377
LOC_Os03g06170	6.67098	5.86706	11.3453	12.2244	12.1808	6.33191	4.11818	11.1838	15.7325	9.38083
LOC_Os03g06250	6.30493	6.26413	2.27503	1.49461	1.81845	7.71175	7.56035	2.20911	1.92579	1.75099
LOC_Os03g06290	5.93224	5.02225	2.44224	2.80492	2.35387	4.10445	4.30573	2.79742	2.85069	2.56944
LOC_Os03g06360	22.0165	18.8318	5.9687	7.38426	7.43384	17.4956	39.8417	9.06187	9.59584	5.75291
LOC_Os03g06430	0.11598	0.240219	1.48056	1.24191	1.56692	0.0242968	0.116807	0.806582	0.825841	0.572731
LOC_Os03g06520	190.445	173.469	85.5595	81.0691	76.7487	293.876	224.831	84.0748	75.7484	79.0869
LOC_Os03g06570	5.25452	5.44339	10.9946	13.3273	11.1704	5.08137	4.8345	11.4849	13.1646	11.0904
LOC_Os03g06670	2.20806	2.87703	13.7923	16.5968	28.6617	0.659347	2.00157	11.754	26.142	6.82477
LOC_Os03g06940	3.78419	4.52883	9.21836	13.0259	13.4811	3.74729	3.46512	10.4865	14.0451	9.66992
LOC_Os03g07180	7.06699	7.3994	0.386168	0.39831	0.213774	7.90614	15.9421	0.193797	0.34726	0.208096
LOC_Os03g07200	35.8042	33.3094	16.5659	12.7255	12.1442	40.1972	46.9665	14.6052	13.6256	13.3053
LOC_Os03g07450	4.10997	6.63292	14.9953	15.0316	20.6945	4.26574	4.57758	12.8555	20.3552	11.5907
LOC_Os03g07810	0.0768217	0.202132	1.43487	1.99599	3.78687	0.0568299	0.184883	0.998965	2.22879	1.42333
LOC_Os03g08330	82.7835	67.5671	37.3925	27.0195	38.2052	369.626	51.7903	34.5844	37.2482	45.0918
LOC_Os03g08460	2.01324	1.80442	4.4301	4.18864	5.82931	1.17089	1.4142	6.00532	4.54513	4.40416
LOC_Os03g08520	2.60715	2.33222	0.629701	0.476124	1.0234	17.2221	5.48347	0.411769	0.965466	0.913214
LOC_Os03g08540	1.8159	1.86529	0.625844	0.474113	0.561667	1.59284	2.42499	0.556247	0.626021	0.739481
LOC_Os03g08550	37.78	40.1404	21.4964	23.0309	25.2334	44.9047	46.0112	19.8302	21.5772	20.279
LOC_Os03g08560	1.47149	1.30058	0.662931	0.698726	0.662557	1.13275	1.59033	0.50713	0.839212	0.614766
LOC_Os03g08700	2.72493	3.25738	1.82314	1.93469	2.08746	3.61426	3.51785	1.88066	1.69014	1.85451
LOC_Os03g08790	22.1968	32.0936	45.0375	54.4699	52.9906	19.8134	19.0628	51.669	67.9624	34.8523
LOC_Os03g08930	1.12678	1.12689	3.23059	3.61141	4.64881	0.631362	0.285708	3.1489	3.98685	1.69963
LOC_Os03g08970	42.2452	35.8909	23.5752	22.1364	21.9136	60.6861	33.9287	23.0361	21.0967	22.8799
LOC_Os03g09170	21.2071	10.7708	1.73596	1.59778	1.70671	31.7028	12.2453	1.23887	0.978447	1.63845
LOC_Os03g09220	19.1561	21.2078	44.1369	49.43	47.0493	20.2622	19.7096	48.0138	43.2145	48.0783
LOC_Os03g09940	4.46579	5.4502	10.2777	10.3632	9.87025	4.41053	3.98746	10.2545	10.0542	10.0704
LOC_Os03g10030	60.933	66.8948	105.063	98.2708	90.3231	41.447	39.8796	89.468	102.419	79.097
LOC_Os03g10080	15.3785	16.4813	8.1315	8.46009	8.45471	15.7589	17.5937	7.61711	8.08066	5.95387
LOC_Os03g10210	0.398691	0.669685	1.50368	1.76548	1.49516	0.419843	0.381133	0.888208	1.86905	1.21208
LOC_Os03g10260	0.0480371	1.06418	1.23658	1.6089	2.24789	0.18459	0.750291	1.09799	1.48484	1.19579
LOC_Os03g10310	1.85384	2.26102	0.86137	0.710857	0.873397	2.02492	2.70871	0.852032	0.969421	1.10666
LOC_Os03g10320	75.7321	71.9566	7.63721	8.80052	8.53663	74.722	74.4662	7.03658	5.44977	6.37541
LOC_Os03g10478	2.571	2.56272	1.37682	0.746285	0.627051	2.37573	2.12149	0.71591	1.13034	0.854187
LOC_Os03g10620	129.076	109.007	57.5392	58.8771	55.6807	133.768	123.436	54.1369	52.6218	61.1398
LOC_Os03g10880	3.7484	3.77912	14.9875	16.306	12.7257	4.21279	3.46992	16.6199	15.3671	17.4084
LOC_Os03g11110	2.16895	2.55723	3.94878	4.6009	5.28334	2.10322	1.78494	4.40251	5.81027	4.21245
LOC_Os03g11210	5.56953	6.43438	17.0626	21.3765	23.1428	4.55025	4.79669	17.6204	22.091	18.1336
LOC_Os03g11300	1.65156	1.78067	2.96896	3.03881	2.57946	1.46894	1.1709	3.34997	2.8842	2.50819
LOC_Os03g11400	0.0605211	0.0173055	0.354052	1.15386	1.47445	0.032174	0.0188671	0.420701	1.11281	0.318413
LOC_Os03g11540	0.177688	0.418114	1.51684	2.14578	3.54423	0.245794	0.299497	0.992232	2.50957	0.669505
LOC_Os03g11550	14.0903	10.3876	6.31457	5.60168	6.5158	12.5412	14.4223	6.3086	6.10029	5.90013
LOC_Os03g11600	0.948828	1.08666	2.45674	1.73367	2.58849	0.641373	0.861494	1.98205	2.07965	2.42925
LOC_Os03g11734	2.35515	2.48451	5.3561	2.84526	3.34699	2.46184	1.80168	5.4408	4.53877	3.2367
LOC_Os03g11910	6.54255	10.1094	3.02579	3.51996	3.51426	8.508	13.6767	2.90469	3.25532	3.03667
LOC_Os03g11950	0.357814	0.985949	2.20045	4.5321	1.95863	0.574221	0.637919	3.7002	1.99474	2.01658
LOC_Os03g12140	0.277094	0.206466	1.98938	2.83519	4.20797	0.13446	0.083369	1.19923	4.1691	0.956375
LOC_Os03g12290	5.20722	6.55279	12.8363	17.3252	22.5232	10.9593	8.93643	9.06885	13.8257	11.2754
LOC_Os03g12530	5.13361	5.9974	11.7607	12.0358	11.8361	5.91899	5.00293	11.2595	12.7623	11.4594
LOC_Os03g12700	16.8671	17.8037	38.9911	34.5292	30.7234	16.6323	18.3781	44.809	40.7639	43.0021
LOC_Os03g12790	6.8922	7.29059	11.3186	15.9697	9.88218	7.68281	6.84358	14.7156	15.2578	16.113
LOC_Os03g12820	16.8106	14.5769	4.91113	4.06289	5.20145	21.5011	19.2076	4.33668	3.83723	3.97265
LOC_Os03g12860	33.4054	23.1206	6.71914	7.72765	9.09937	29.2982	28.4191	8.25473	7.66022	7.23762
LOC_Os03g13200	64.472	77.7605	113.901	155.935	119.969	44.6101	54.0103	99.0619	118.178	99.3597
LOC_Os03g13540	164.145	168.726	33.3531	36.0109	35.6321	153.301	153.891	37.2538	37.573	34.5736
LOC_Os03g13570	7.34836	14.2222	19.0445	34.5537	26.9408	7.4938	9.51009	29.6876	32.5931	27.694
LOC_Os03g13710	0.222026	0.301097	0.047551	0.0657005	0.0650051	0.399806	0.361951	0.059346	0.071829	0.0767324
LOC_Os03g13810	16.2825	16.2964	9.37965	9.47389	9.95312	29.2964	19.5429	10.6358	11.8331	11.4625
LOC_Os03g14050	89.0838	130.478	25.7487	30.0032	27.578	82.1143	122.468	25.2701	28.5563	25.1378
LOC_Os03g14130	9.72393	20.7818	98.4323	99.1495	128.718	6.2156	11.4428	56.2636	106.415	56.0832
LOC_Os03g14140	0.311727	0.808673	4.84642	2.58963	5.98191	0.19015	0.572407	2.7424	10.6078	1.44897
LOC_Os03g14180	52.2239	106.142	5.33527	3.88248	5.45535	68.5865	116.466	11.6829	12.378	6.8312
LOC_Os03g14258	0.90999	1.49717	1.2121	0.629751	1.24042	4.10684	1.64931	0.335666	0.661136	1.14434
LOC_Os03g14370	39.0428	34.6728	17.4757	18.3964	17.9461	57.8801	36.4477	20.0981	19.7535	22.5651
LOC_Os03g14420	4.44893	4.66526	1.92712	2.08507	1.66958	3.74647	4.01042	1.56486	1.40882	2.33701
LOC_Os03g14654	1.57357	2.52794	10.4763	16.8721	15.1324	2.10616	1.77992	22.9148	34.7739	42.8205
LOC_Os03g15050	15.1272	13.2709	40.2967	38.7168	35.1129	16.6812	14.8426	39.0749	35.7465	35.3428
LOC_Os03g15270	17.4457	10.1449	1.99211	2.91859	2.20257	16.6917	19.0896	2.25807	2.10453	2.54066
LOC_Os03g15320	0.184213	0.789891	2.53554	2.02247	1.89497	0.29773	0.245792	2.74005	3.31889	1.82977
LOC_Os03g15340	24.1756	18.1895	9.95959	7.23834	7.58324	16.2378	19.0441	10.7731	6.99321	8.33127
LOC_Os03g15370	0.906151	0.895737	5.65992	13.6345	28.8507	1.7908	1.2771	9.44585	11.3703	7.16887
LOC_Os03g15460	8.53854	9.12231	21.3085	22.7895	23.988	7.82368	6.35001	18.2621	19.6533	16.6264
LOC_Os03g15530	18.989	19.2204	34.5844	30.6914	30.6412	21.9717	19.0499	44.2053	39.7349	43.2024
LOC_Os03g15790	0.728598	1.73292	4.40252	3.69851	7.27007	0.652025	1.46257	2.68951	6.72117	3.53819
LOC_Os03g15890	102.436	138.303	67.988	70.2292	69.0092	134.581	182.519	70.9376	76.7601	68.6731
LOC_Os03g15960	148.308	173.67	30.2623	51.3256	50.1537	285.495	459.575	44.5018	53.861	55.2423
LOC_Os03g16020	3.84091	13.1675	3.17258	4.81735	6.94803	20.2994	33.4361	2.95317	6.06095	0.00061332
LOC_Os03g16030	22.7114	27.0354	6.40832	5.74924	8.45739	31.9904	55.3074	7.24948	7.66108	8.04348
LOC_Os03g16170	163.824	123.597	15.3996	15.3491	14.1647	141.165	166.397	12.2639	12.5993	13.6715
LOC_Os03g16334	41.0933	32.2405	12.2444	12.3504	12.266	33.1247	38.9898	10.2751	10.6021	11.7212
LOC_Os03g16600	36.2109	25.2267	14.6134	12.3694	13.5474	38.7366	46.2758	14.3692	16.7623	15.9602
LOC_Os03g16610	47.9824	42.6931	10.7747	11.0475	12.8008	53.6602	56.5445	10.3705	13.7154	12.4507
LOC_Os03g16670	138.434	114.908	35.9551	44.4369	41.8102	111.454	138.373	35.1931	35.0112	31.9991
LOC_Os03g16718	0.302088	0.557018	0.515907	0.464131	0.641235	0.20989	0.198678	0.469288	0.865751	0.488816
LOC_Os03g16920	18.2513	21.7837	3.00468	3.27793	3.54193	23.5089	40.2828	3.00362	3.19194	2.66021
LOC_Os03g17100	77.4175	65.9659	174.083	172.174	293.131	66.2136	62.4162	153.558	237.713	134.055
LOC_Os03g17230	1.12246	1.08999	0.793367	0.779944	0.887189	1.71581	1.26499	0.784833	0.724713	0.605923
LOC_Os03g17760	1.15803	1.19174	7.21416	11.7023	16.2262	0.959215	1.33238	7.09013	13.0247	6.56637
LOC_Os03g17790	1874.1	1405.81	54.6587	51.5562	51.8455	1173	1475.44	38.7638	48.6273	35.4546
LOC_Os03g17800	23.1439	24.4096	10.733	9.81444	10.5511	21.7398	22.9459	8.49327	8.39162	8.50278
LOC_Os03g17840	5.18926	8.70558	13.044	16.6219	14.4442	4.82058	8.13485	9.8256	16.1822	11.9362
LOC_Os03g17960	0.0661049	0.103683	0.487406	0.832078	1.31567	0	0.132902	0.484921	1.08219	0.378005
LOC_Os03g18030	1.45417	1.40659	0.4044	0.55853	0.534223	3.02945	2.41994	0.679737	0.900215	0.708838
LOC_Os03g18070	20.0664	18.8071	53.9033	48.9904	45.1761	49.9195	19.0469	55.2619	55.2767	59.8253
LOC_Os03g18110	3.41791	4.6509	8.33731	8.52199	10.7608	2.32082	2.34992	6.75325	9.62846	7.79894
LOC_Os03g18120	1.1152	1.48476	3.3864	5.39683	5.57859	1.00249	0.991504	3.83339	4.91094	3.70709
LOC_Os03g18490	6.9189	3.82424	0.339482	0.456428	0.360814	5.25425	8.89931	0.356334	0.570307	0.484256
LOC_Os03g18600	9.47198	9.57732	38.4126	31.7807	34.2942	7.98484	8.78162	48.492	48.8745	56.6627
LOC_Os03g18630	0.0593943	0.0418804	0.355012	0.508361	1.03501	0.0592935	0.0256606	0.343847	0.66813	0.216002
LOC_Os03g18640	0.321533	0.168612	1.15918	0.986745	0.662343	0.127284	0.170493	0.350263	1.49421	0.513492
LOC_Os03g18680	60.3158	50.2983	20.6868	18.3843	18.8576	48.8985	54.888	19.4946	19.6336	17.9915
LOC_Os03g18850	83.613	89.8508	34.5107	32.0375	30.597	70.6698	77.2204	32.5027	27.2489	33.748
LOC_Os03g18960	0.24813	0.571868	1.14049	1.67238	1.71386	0.298418	0.7664	1.05799	1.41424	1.28625
LOC_Os03g19080	0.224163	0.466917	0.782532	0.992934	1.72984	0.310307	0.354224	0.593346	1.36346	0.366006
LOC_Os03g19170	2.37316	2.98266	4.81661	2.5931	3.67301	0.99574	0.737287	3.32709	3.66117	2.91002
LOC_Os03g19200	1.51791	1.65237	2.86376	4.40588	4.89023	1.27176	1.81862	3.01589	5.19852	2.48192
LOC_Os03g19220	7.08455	7.54612	14.2901	18.2875	18.8028	6.73094	8.02837	15.8844	13.356	15.8987
LOC_Os03g19240	3.06535	2.72395	5.27246	4.62139	4.16611	2.56052	2.40901	5.1146	5.18043	5.1023
LOC_Os03g19270	12.8079	13.2718	5.10663	5.57902	4.36562	13.3118	15.992	6.49419	5.86059	3.53952
LOC_Os03g19290	396.329	457.123	25.1563	24.9376	28.3031	383.299	499.21	22.0294	23.5315	23.5738
LOC_Os03g19400	29.3336	26.1978	17.0764	15.1668	16.4902	43.2994	24.0378	15.6415	15.4731	15.781
LOC_Os03g19420	0.448763	0.599905	3.51259	6.63218	6.93451	2.72377	2.50148	2.13316	4.57006	3.56937
LOC_Os03g19427	0.875778	1.35449	6.58135	14.9276	15.2314	5.78299	2.33913	3.70376	5.02529	6.45279
LOC_Os03g19600	0.108382	0.000171663	0.654446	0.504026	0.961205	0.0675278	0.000300727	2.76e-06	0.0875677	0.365918
LOC_Os03g20090	13.1267	12.308	3.96384	4.81309	3.62581	15.3463	11.8182	3.53694	2.91525	3.9279
LOC_Os03g20120	248.268	178.352	53.8139	51.3506	55.814	143.586	255.616	42.2922	39.9053	45.1099
LOC_Os03g20330	29.0712	19.9214	180.571	87.1423	120.698	19.6633	12.9432	143.486	100.758	96.6607
LOC_Os03g20440	2.23676	2.78945	4.51604	4.55661	6.66541	1.97335	2.14789	3.83216	5.35308	5.26187
LOC_Os03g20450	0.562884	1.10023	3.73818	4.68029	5.30445	0.39525	0.691863	3.88349	6.46218	3.18995
LOC_Os03g20550	15.9276	15.0621	9.17131	7.50087	8.4787	12.9814	15.5236	7.4879	6.59379	6.75018
LOC_Os03g20650	12.9305	14.2452	19.8425	16.5616	19.9999	10.7706	8.8901	21.4131	20.2116	16.7382
LOC_Os03g20680	10.1463	3.64818	0.14559	0.0555507	0	4.98636	11.9415	0.0831433	0.0485206	0
LOC_Os03g20730	83.5684	74.8443	37.3586	28.3865	35.8518	83.5715	86.5028	36.0454	36.5869	40.3015
LOC_Os03g20760	17.1512	22.473	48.945	57.0706	43.4733	20.6436	21.2321	51.0589	60.4861	56.2293
LOC_Os03g20870	22.5697	20.7232	9.74886	8.98987	8.71262	22.8188	25.684	9.82647	8.59815	9.76482
LOC_Os03g21000	181.824	163.657	82.6411	81.5707	80.0112	171.034	178.155	94.1596	84.8178	87.283
LOC_Os03g21030	55.7835	44.2573	25.3675	21.7948	20.757	105.683	56.8692	27.8058	27.3159	27.3732
LOC_Os03g21060	32.9621	26.5283	16.6724	10.9196	11.9926	36.6738	30.0816	15.7706	15.0442	14.2581
LOC_Os03g21260	0.417251	0.394709	0.107334	0.183122	0.285902	0.326883	0.485661	0.0458398	0.06263	0.096875
LOC_Os03g21400	1.16293	1.26165	4.07939	5.6926	4.43847	1.35598	1.02334	4.48355	4.32405	4.91083
LOC_Os03g21640	8.34064	6.92558	3.04851	2.68305	2.95573	13.2858	6.37984	2.85088	3.0259	2.88539
LOC_Os03g21710	2.74241	1.53007	11.6909	5.04797	6.95258	1.62884	1.29145	6.59531	4.7057	5.58997
LOC_Os03g21730	0.739486	1.21182	2.5068	3.96497	3.53774	0.767356	0.75142	2.93208	3.60339	1.87025
LOC_Os03g21820	0.814274	1.54357	2.76592	2.56347	3.65045	1.53158	1.32046	1.83711	4.38979	2.33276
LOC_Os03g21960	1.1292	0.960836	1.27014	1.54213	1.2457	0.937095	0.413057	1.2517	1.67979	1.73819
LOC_Os03g22020	1.00495	0.685932	2.39814	3.06596	3.26534	0.346757	0.962815	2.09213	3.32717	3.09589
LOC_Os03g22040	0.935535	1.28884	1.89463	2.72553	2.76008	0.823536	0.751094	2.259	3.05279	2.14484
LOC_Os03g22120	30.5052	31.2958	10.3006	10.4889	10.7453	37.7584	41.0316	12.7732	11.7616	12.0455
LOC_Os03g22210	10.1818	8.62378	35.3962	36.4152	36.6643	7.86225	8.75856	41.1363	30.4994	34.3658
LOC_Os03g22230	1.5318	0.869181	13.1524	12.7174	15.9793	1.45431	1.45204	15.9198	9.39992	11.5359
LOC_Os03g22270	510.988	563.891	300.464	317.01	305.455	632.166	687.863	297.913	303.21	336.38
LOC_Os03g22620	11.3544	10.1388	2.38038	2.31923	2.65973	9.66825	10.3	1.13916	1.62123	1.84124
LOC_Os03g22680	14.8458	15.3956	8.53626	6.78667	5.86796	19.4047	23.9521	5.60686	6.57522	5.29644
LOC_Os03g22790	103.582	72.6389	18.207	16.9155	15.9666	92.2505	83.6251	16.4939	16.4645	17.391
LOC_Os03g22960	14.752	13.5482	5.29373	5.52026	6.7387	10.6728	10.2605	7.77156	6.22472	5.33607
LOC_Os03g23960	4.55416	5.85864	7.68	10.1871	9.14865	3.61069	4.07625	8.23968	9.32581	7.83763
LOC_Os03g24070	1.19264	1.73051	0.59455	0.706267	0.622061	1.22952	2.40514	0.660244	0.632449	0.719598
LOC_Os03g24560	8.33507	9.61295	13.8126	14.1955	11.7053	4.72748	5.93952	14.5081	13.3625	15.4981
LOC_Os03g24730	13.7318	11.3375	5.52005	5.73378	4.76078	12.5036	12.1237	6.63804	6.43603	6.26085
LOC_Os03g24760	5.74395	6.88064	11.1798	10.8741	11.3067	6.89804	4.54273	9.41061	10.2174	16.4813
LOC_Os03g24820	0.73208	1.09275	0.136389	0	0	1.6243	1.98851	0.25932	0.162679	0.101446
LOC_Os03g24910	1.25138	1.7313	2.33165	2.40904	2.60471	1.038	1.06865	2.21918	2.87772	2.46888
LOC_Os03g24930	80.7151	54.0843	171.432	144.071	132.646	60.4639	57.2745	181.336	153.708	165.73
LOC_Os03g24940	2.59916	3.4163	8.00299	8.27199	8.27546	2.1684	2.48831	7.49829	9.18611	6.01972
LOC_Os03g25490	0.40742	0.486992	0.076398	0.076128	0.0640185	0.212768	0.572074	0.10707	0.058813	0.0103905
LOC_Os03g25550	1.29652	2.26794	2.51161	4.49311	3.20319	1.01373	1.13416	3.35319	4.15208	3.14772
LOC_Os03g26490	28.0739	22.2973	3.62098	4.93463	2.8952	25.073	34.9198	5.01134	4.40483	4.56648
LOC_Os03g26870	47.1551	34.6753	7.99564	9.24375	8.82687	40.2063	43.3355	7.57077	7.2626	8.47878
LOC_Os03g27110	6.89092	7.34026	0.386713	0.20325	0.340114	7.58112	9.83837	0.499726	0.556126	0.365404
LOC_Os03g27120	81.8122	68.3153	218.128	216.767	181.553	76.8367	84.8527	255.35	229.085	227.597
LOC_Os03g27370	0.500725	0.781765	1.2302	1.47337	1.86325	0.760588	0.590181	1.57492	1.75011	1.22719
LOC_Os03g27480	0.505476	0.582211	2.10043	2.73863	2.06442	0.887509	0.384202	1.9095	3.07164	1.50526
LOC_Os03g28040	12.7579	15.5274	21.4732	25.4941	23.5725	9.14039	9.18661	22.2428	28.4972	24.4606
LOC_Os03g28300	43.7653	45.5967	24.5805	22.2289	21.815	51.5941	51.6887	24.9463	25.2042	21.5026
LOC_Os03g28330	65.0818	83.2284	178.466	241.421	241.006	59.3414	59.1702	181.419	247.247	169.969
LOC_Os03g29190	7.92171	5.57119	16.6544	9.3529	10.8427	2.88662	3.20384	8.31408	6.51499	5.88105
LOC_Os03g30150	2.46898	4.12275	0.202864	0.236268	0.897393	2.11109	4.13531	0.721682	1.05852	0.942184
LOC_Os03g30300	1.76889	2.55993	1.11693	1.29699	1.7428	2.5899	3.06252	1.16155	1.36419	1.18443
LOC_Os03g30830	17.1615	18.2053	25.4901	26.623	26.3479	11.0176	11.7058	25.3958	27.7662	21.192
LOC_Os03g31679	111.128	99.9582	199.637	212.196	197.252	80.3272	78.0201	197.023	204.462	210.388
LOC_Os03g32460	0.0571223	0.0475476	0.152466	0.118528	0.137683	0.0586359	0.0366463	0.0862179	0.204707	0.141763
LOC_Os03g35600	0.423475	0.438132	0.968223	0.722896	0.812976	0.444899	0.257929	0.744355	0.728327	0.831905
LOC_Os03g35640	2.47125	2.66241	0.567274	0.49448	0.877802	2.58843	2.50487	0.720952	0.584657	0.458262
LOC_Os03g36279	0.505537	0.453249	0.155326	0.107161	0.199066	0.45999	0.654358	0.120333	0.0971349	0.13079
LOC_Os03g37770	9.55417	6.76338	0.511604	0.196329	0.335642	5.98121	9.3407	0	0	0
LOC_Os03g37810	4.78307	4.33393	8.14684	9.46222	13.9582	4.13135	3.36779	7.60116	12.1772	6.47383
LOC_Os03g37840	22.8037	20.1834	13.7814	10.6869	11.5479	23.1519	26.7493	10.9117	10.6642	9.99743
LOC_Os03g37960	1.1131	1.00634	2.21965	2.99252	2.593	0.811603	0.625806	2.794	2.79869	1.90809
LOC_Os03g38170	1.14181	0.996402	2.44323	1.65987	2.79932	0.627466	0.791329	1.66367	2.75996	1.37437
LOC_Os03g38250	0.0979183	0.154762	0.309387	0.304624	0.274842	0.0254879	0.0507197	0.145848	0.174059	0.0758582
LOC_Os03g38470	0.176147	0.0986164	1.16178	1.97905	1.94481	0.0520735	0.117381	1.45174	1.08547	1.79519
LOC_Os03g38640	2.1118	2.7385	6.07576	5.4368	7.81943	1.1786	1.16047	4.24062	6.25177	3.18757
LOC_Os03g39020	0.109746	0.22637	0.895241	1.25902	2.54625	0.0725583	0.11943	0.748639	1.74595	0.517734
LOC_Os03g39650	1.58103	1.84773	3.45688	3.89356	3.11613	0.756268	0.948671	1.82407	2.17044	2.33538
LOC_Os03g40070	6.18225	4.37072	9.43215	9.07534	10.4793	3.07513	3.29827	9.60108	8.2498	11.258
LOC_Os03g40100	4.32872	4.67043	9.81613	9.79108	10.2325	4.11282	5.0117	11.1383	9.54796	9.32778
LOC_Os03g40670	7.01453	7.93593	13.6459	12.6638	14.1494	4.06521	4.7056	9.24204	10.3646	9.88354
LOC_Os03g41060	36.8767	67.2466	11.3941	14.2127	15.2523	46.0682	77.3751	13.4027	15.8856	8.72939
LOC_Os03g41390	9.50978	5.62131	2.18288	2.99569	2.39304	7.53812	8.08081	1.85258	2.65663	3.02345
LOC_Os03g41480	0.383024	0.162226	1.37163	1.62015	1.40327	0.104463	0.201816	1.47021	1.23815	1.41865
LOC_Os03g42520	0.969253	0.502306	0.011687	0.0550488	0.0347087	0.52289	1.33005	0.0104327	0.0252917	0
LOC_Os03g42600	141.815	110.262	33.6982	38.9652	37.9591	69.2393	52.5142	28.4581	21.8699	23.1637
LOC_Os03g42630	1.95783	2.28176	4.90367	4.02257	4.08542	1.21798	1.79973	3.73231	7.79509	3.47748
LOC_Os03g42760	2.72383	2.5894	1.57319	1.63384	1.76043	2.02891	2.70894	1.37189	0.957707	1.10972
LOC_Os03g42830	14.5391	11.9846	4.08867	3.09628	3.63903	14.9257	14.4124	3.41929	4.28467	3.12264
LOC_Os03g43010	10.3797	8.7432	14.8339	16.3736	14.2745	6.69681	8.2907	16.5501	16.9826	13.8278
LOC_Os03g43440	25.5701	23.4227	51.8311	60.5233	46.3078	34.1113	25.1216	65.2598	59.9783	62.6382
LOC_Os03g43670	1.81763	2.61215	4.79739	6.38026	6.24937	1.98943	2.22324	4.46337	6.22929	4.36508
LOC_Os03g43720	6.35042	6.47598	2.36677	2.06177	1.93211	8.60389	10.4394	1.73031	1.78732	1.79255
LOC_Os03g43750	2.30179	1.14236	1.34738	0.307477	0.523715	2.10752	1.74479	0.280428	0.279562	0.306473
LOC_Os03g44150	32.6706	32.1823	13.3272	13.2607	13.7664	37.581	39.8106	13.4761	12.7529	13.366
LOC_Os03g44380	26.2452	18.0038	1.45648	1.66836	1.02301	28.3135	30.946	1.3257	1.00453	1.64875
LOC_Os03g44740	7.57516	6.5242	15.4607	12.5467	10.3498	5.29833	8.21663	15.8384	12.7099	13.7552
LOC_Os03g44810	1.50089	1.99268	0.708571	0.793714	1.06632	2.47062	1.97957	0.631748	0.801319	0.772098
LOC_Os03g44880	0.675754	0.741577	4.36851	3.56206	3.63202	0.157675	0.084783	12.7395	14.5235	4.56416
LOC_Os03g45194	44.8039	48.9843	23.6092	21.034	18.1462	69.471	68.6084	25.3034	20.9238	23.6144
LOC_Os03g45210	5.87367	4.80385	0.505342	0.226117	0.229432	5.76407	6.29348	0.272068	0.515305	0.363799
LOC_Os03g45280	18.5646	13.4757	5.32063	5.4406	3.76853	30.3963	30.7304	6.86909	4.93489	4.91318
LOC_Os03g45340	8.03354	7.41081	12.8171	13.8153	15.0998	5.70235	7.55706	12.52	18.9221	13.1437
LOC_Os03g45450	2.45561	1.99919	3.54949	1.89485	3.92732	1.5964	0.985993	4.18646	2.39476	4.03226
LOC_Os03g45619	37.4742	47.7119	102.206	153.494	105.576	28.922	27.1251	101.712	100.915	96.9793
LOC_Os03g45720	413.312	414.661	174.519	172.872	165.88	343.709	338.597	175.464	147.035	173.533
LOC_Os03g45760	0.362772	0.389157	1.02303	1.22924	2.25726	0.217807	0.244785	0.76138	1.82769	0.638502
LOC_Os03g46060	27.6762	17.0247	17.539	6.16717	16.7172	16.0783	14.6621	6.92285	4.23332	9.83277
LOC_Os03g46150	6.92657	8.10827	23.1514	24.6026	25.1914	5.53365	6.17598	15.3246	31.5133	21.5449
LOC_Os03g46260	4.41694	4.8698	11.0001	13.2659	11.477	4.45863	3.55273	11.5117	12.5178	10.3318
LOC_Os03g46420	4.31072	3.42774	2.1077	2.27302	2.12078	3.36366	5.08594	2.11427	1.34713	1.8076
LOC_Os03g46920	0.0231439	0.0894136	0.847589	1.05309	2.68645	0.035708	0.0147948	0.706144	1.9451	0.561883
LOC_Os03g47010	1.46919	1.42129	6.0664	6.9586	4.34208	0.798102	1.19138	4.38577	6.79123	5.97389
LOC_Os03g47190	0.110393	0.226694	0.686808	0.556049	1.01322	0.311611	0.0739808	0.641428	0.938747	0.572273
LOC_Os03g47210	3.06057	3.06793	4.88088	6.87457	6.23558	1.63639	1.64132	6.26373	6.33494	6.48492
LOC_Os03g47230	1.56175	1.91486	3.5045	4.80016	3.46011	1.16967	0.509465	3.64265	3.07564	2.66619
LOC_Os03g47620	0.244654	0.1383	0.497494	0.442982	0.592698	0.11076	0.0945646	0.108543	0.295514	0.142749
LOC_Os03g47730	0	0	1.18132	1.87506	1.67876	0.0371315	0.0927168	2.01161	1.99447	0.738837
LOC_Os03g48000	23.7104	21.7912	12.5319	13.6519	12.4678	29.0937	27.5537	13.4444	12.6191	11.9036
LOC_Os03g48310	9.18196	9.63501	3.33669	2.21961	2.13294	13.7421	14.4277	2.73302	2.80182	2.3761
LOC_Os03g48560	6.75282	8.94401	9.79817	13.6524	10.9771	4.62693	5.37241	10.287	11.5976	8.56647
LOC_Os03g48600	4.00064	4.74999	8.23924	8.91346	8.77836	3.54957	3.97384	6.98591	9.26442	6.04996
LOC_Os03g48710	91.8329	85.8885	31.3963	28.7286	28.1915	88.6837	91.5272	29.6322	28.6734	25.3131
LOC_Os03g48780	35.4493	30.1462	3.40518	3.27546	2.6743	37.8635	47.5698	3.99283	2.24624	3.21723
LOC_Os03g48970	141.567	143.865	74.9056	79.0415	75.0386	143.895	150.907	75.5567	71.3949	73.5414
LOC_Os03g49050	0.140847	0.165666	0.909742	1.00858	1.7288	0.173568	0.0961522	0.546232	1.16678	0.404586
LOC_Os03g49430	12.9033	18.4638	3.98106	5.2887	4.97867	17.5883	35.2755	4.2199	5.60913	5.66527
LOC_Os03g49440	49.7073	46.3096	23.5526	21.3903	22.6474	52.0735	54.3752	22.0907	25.5427	20.9091
LOC_Os03g49610	1.22549	2.33278	5.07093	6.62855	9.42368	1.12766	1.31243	4.99137	8.41938	5.06953
LOC_Os03g49830	6.23055	4.68722	11.9764	13.9112	11.6023	5.72249	5.17013	12.8857	12.0485	14.9362
LOC_Os03g50180	0.278322	0.256441	0.146535	0.137042	0.184391	0.272526	0.178423	0.0574287	0.0421152	0.0833748
LOC_Os03g50260	3.29195	7.77916	8.09137	10.1351	7.69171	3.90948	5.1614	10.135	11.6429	9.446
LOC_Os03g50420	0.0422264	0	0.409407	0.348524	0.840222	0.0212447	0	0.173479	1.07935	0.38312
LOC_Os03g50470	2.48049	1.9747	0.807923	0.921871	1.1977	3.07342	2.97155	1.38754	0.924997	0.976544
LOC_Os03g50960	96.1278	83.0556	14.8328	17.5557	18.5085	76.8417	92.1392	16.2896	12.6608	19.5846
LOC_Os03g50970	2.25992	2.84317	7.48811	9.19927	7.55506	2.43117	2.33975	9.09677	8.75349	8.36204
LOC_Os03g51010	7.5183	10.8322	4.99277	6.46292	5.29712	10.1361	17.3579	5.04355	5.72089	6.63193
LOC_Os03g51240	14.5632	11.1768	2.54976	4.73221	3.89137	9.77563	12.0108	3.3919	2.97476	3.80257
LOC_Os03g51350	21.0423	14.5889	0.410513	0.600676	0.607361	12.7076	21.3674	0.545079	0.373675	0.338112
LOC_Os03g51390	16.1983	10.2948	5.42124	4.19024	5.88133	22.5914	6.81168	4.82247	3.86674	4.78896
LOC_Os03g51459	23.236	24.5566	12.2646	11.9559	11.9649	24.4004	30.7716	11.9767	11.7893	12.0753
LOC_Os03g51479	11.7846	13.7271	7.91583	6.87183	7.45472	11.7197	13.4203	6.56314	5.62206	6.64235
LOC_Os03g51530	0.638198	0.11316	2.22993	1.51262	4.14191	0.316121	0.681349	3.45253	2.00616	3.00134
LOC_Os03g51910	0.905671	1.03777	2.35479	1.75116	2.32064	0.994532	0.844808	1.69812	1.66051	1.57553
LOC_Os03g52070	4.18797	4.73686	10.6209	10.6118	9.90868	4.12705	3.97503	8.90657	10.5785	7.64802
LOC_Os03g52370	10.347	8.34314	3.56011	3.04103	4.39599	5.60108	7.12528	2.14445	2.64477	2.67888
LOC_Os03g52410	7.91313	4.72356	2.47633	0.967	3.0259	28.4487	1.24989	2.12252	3.25876	3.18629
LOC_Os03g52460	17.2	18.3352	35.7465	38.8446	35.6409	21.279	18.2139	38.6373	37.044	39.6188
LOC_Os03g52650	0.401706	0.575705	2.54123	4.19872	9.20575	0.0547204	0.0712537	2.49997	9.00444	2.36116
LOC_Os03g52910	11.227	14.3801	3.60291	5.99105	6.08155	36.1821	6.88474	6.95021	5.42844	6.75985
LOC_Os03g53020	68.8368	58.1479	21.1409	16.9502	19.2342	359.045	31.9821	21.7657	19.8936	21.7745
LOC_Os03g53340	1.10793	1.35452	0.3175	0.335425	0.588843	1.86946	2.87098	0.5019	0.568666	0.637474
LOC_Os03g53400	6.94874	9.34471	5.9282	5.04411	5.52205	9.61022	14.9829	5.16449	5.87847	4.64966
LOC_Os03g53520	26.0928	28.1954	54.8717	54.0804	47.4555	22.2295	23.9044	52.7628	57.5965	50.0331
LOC_Os03g53540	5.16397	4.38605	1.4602	1.71454	2.05546	5.05758	5.54773	1.29433	0.938745	2.20514
LOC_Os03g53550	4.78413	4.01808	8.80921	8.40299	7.65887	5.3458	4.80374	10.3493	10.8731	9.7334
LOC_Os03g53800	33.5303	40.4124	70.5612	85.964	82.8705	27.7249	29.7797	64.6498	72.9845	57.505
LOC_Os03g53910	54.3123	80.7239	32.1043	33.9723	33.6538	60.6438	89.3589	30.8408	33.7673	31.9195
LOC_Os03g54000	5.98752	6.02642	29.9292	30.6337	32.9287	7.08012	5.1414	30.1788	24.8535	28.4658
LOC_Os03g54910	2.95283	4.78136	5.94199	8.21134	10.4405	2.88054	3.59868	8.09864	10.697	5.27767
LOC_Os03g54930	1.29359	1.4405	0.576758	0.520376	0.574479	0.723627	1.13145	0.323992	0.328485	0.276269
LOC_Os03g55034	1.24511	2.03552	0.937714	0.9669	0.360751	4.39428	3.74623	0.831028	0.791142	1.23582
LOC_Os03g55290	21.0791	26.9344	94.7332	112.549	114.849	26.3991	31.2426	108.638	153.797	78.5439
LOC_Os03g55320	46.3745	46.7664	31.1422	30.3643	32.3186	94.1882	52.6911	30.7188	26.4152	31.2023
LOC_Os03g55350	9.48408	11.118	18.6366	26.9796	20.5507	7.66199	7.97775	25.9952	27.1676	20.1712
LOC_Os03g55380	9.82344	9.61988	3.83098	4.13664	5.09163	8.12732	8.73791	3.42714	4.14284	3.06266
LOC_Os03g55420	6.67277	8.91336	12.5563	18.036	14.5141	6.30176	6.19324	14.0786	14.1082	13.2127
LOC_Os03g55660	274.586	251.994	126.23	106.811	118.899	332.566	399.029	139.553	128.285	145.395
LOC_Os03g55830	1.02154	1.08783	2.47159	2.92831	2.87283	1.01729	1.21242	2.32579	4.09083	2.12649
LOC_Os03g55850	409.965	372.349	143.142	133.529	141.873	347.29	428.176	120.481	128.925	116.782
LOC_Os03g55870	34.351	29.7059	16.2419	13.6571	15.0346	29.4575	34.8783	17.1508	16.2762	15.3556
LOC_Os03g56070	0.0662877	0.114686	0.574184	0.881732	1.96984	0	0.0161232	0.477132	1.38009	0.47642
LOC_Os03g56270	4.96666	5.58359	8.58743	9.43265	10.1594	4.60176	3.84174	6.81525	10.1793	7.89701
LOC_Os03g56820	3.88904	5.05635	7.11313	8.99105	13.2172	2.63622	4.3723	7.85493	11.9513	6.75268
LOC_Os03g56944	10.3719	11.785	28.012	27.258	29.9902	9.33069	10.7534	25.1714	41.1095	32.7035
LOC_Os03g56950	3.86177	3.86819	13.9623	14.7129	13.4414	5.89817	5.24444	17.0981	12.9143	15.2988
LOC_Os03g57080	3.59726	5.58606	14.7544	11.3421	11.5507	3.82397	2.5958	11.7728	13.5827	11.5908
LOC_Os03g57720	0.95754	0.557571	0.160736	0.24527	0.319815	0.719084	0.619841	0.141726	0.173673	0.223362
LOC_Os03g57780	1.37792	3.39792	5.75036	6.96831	7.4609	1.27086	2.1564	4.78179	8.51801	3.96765
LOC_Os03g57880	13.2447	10.3968	5.49892	4.32861	6.06161	18.3068	14.2562	5.00786	6.10185	5.75381
LOC_Os03g57950	0.19658	0.256317	0.76734	0.752902	1.0331	0.147098	0.174822	0.533992	0.849393	0.421847
LOC_Os03g58020	58.7707	44.8146	24.3344	25.5549	19.8844	47.2602	49.8045	22.4432	19.0323	22.9617
LOC_Os03g58110	14.5157	14.1516	21.5732	24.3813	23.1018	9.09985	7.60096	17.0465	19.4709	20.9971
LOC_Os03g58170	21.1307	25.8461	11.0154	10.469	10.8941	20.9156	27.1196	10.292	9.8675	10.1009
LOC_Os03g58220	0.308954	0.789831	2.52996	2.31588	2.73625	0.481498	0.406802	3.23378	1.66018	2.75079
LOC_Os03g58230	74.3431	74.7381	172.678	184.233	161.869	78.0067	78.6358	198.376	198.373	209.188
LOC_Os03g58320	0.716014	0.471764	0.698749	0	0.342745	0.269635	0.209253	1.36092	1.20287	1.22001
LOC_Os03g58350	2.09331	3.28906	6.54048	7.57239	10.2287	1.47436	1.33519	5.83288	12.126	5.24697
LOC_Os03g58420	0.142101	0.45175	0.655941	0.669192	1.01192	0.190889	0.198747	0.78033	0.818527	0.957564
LOC_Os03g58470	91.011	94.3366	171.955	185.004	187.91	90.6949	93.9941	189.026	203.767	172.042
LOC_Os03g58790	6.08776	4.98738	10.3595	6.93321	7.71899	2.97227	3.90867	8.52317	6.54422	7.30665
LOC_Os03g58870	0.428191	0.523704	0.959528	0.893366	0.918192	0.0817265	0.289254	0.737921	1.34187	0.77106
LOC_Os03g58980	19.6185	19.6676	31.2671	25.527	30.2564	10.2662	13.3909	26.3931	20.4229	25.7209
LOC_Os03g59040	15.79	14.082	6.80838	7.055	9.74022	15.8308	15.0668	6.41375	7.77326	6.47771
LOC_Os03g59240	5.80668	8.20575	10.7268	13.9974	14.4074	5.97563	6.34701	11.1649	14.838	11.0832
LOC_Os03g59320	88.1182	77.6181	46.7472	40.949	40.7147	100.022	102.035	47.5775	42.2625	43.7231
LOC_Os03g59360	370.92	304.834	109.959	119.148	114.03	272.152	327.765	100.472	98.3196	95.8448
LOC_Os03g59460	1.86978	1.30088	0.0722142	0.0625724	0.12347	1.57957	1.3799	0.113083	0.0782347	0.0512434
LOC_Os03g59480	5.99501	6.38795	3.24909	3.52253	3.67052	6.42632	6.82998	2.91592	3.85132	3.23446
LOC_Os03g59770	2.30928	1.17594	7.68979	2.90596	3.13162	1.15434	0.956428	3.6655	2.59228	4.02211
LOC_Os03g60080	260.099	230.989	81.3285	74.7211	85.766	724.326	279.994	90.8813	94.0592	113.487
LOC_Os03g60260	8.60846	8.41992	0.912208	1.11912	1.29979	5.21514	7.53027	0.89727	1.69949	0.679276
LOC_Os03g60300	0.281278	0.208663	1.73871	1.27871	1.55908	0.155803	0.205653	1.14905	2.34426	1.1206
LOC_Os03g60370	17.4239	18.4602	10.0128	9.4477	10.8198	18.0069	20.865	8.0137	9.2978	8.88635
LOC_Os03g60560	18.3326	12.2081	1.40057	0.905627	1.31644	34.8465	36.9503	1.12581	1.65154	1.36005
LOC_Os03g60570	14.6379	11.4503	0.86756	0.822389	0.953293	77.9011	8.9481	0.852939	1.31986	0.817555
LOC_Os03g60580	382.299	290.402	64.5539	63.1119	64.8034	323.711	416.439	57.4906	60.9908	59.2577
LOC_Os03g60720	12.4261	22.429	28.711	33.6151	33.2197	12.5144	16.6043	33.7747	40.8057	23.7614
LOC_Os03g60780	19.1402	23.9288	15.4772	15.2134	15.2584	30.5275	31.1795	15.1392	15.0681	15.3792
LOC_Os03g60840	10.3443	10.8581	3.97618	4.79401	4.58015	9.65597	11.7099	3.78102	4.18148	3.54373
LOC_Os03g60850	11.4977	13.26	28.8744	28.9625	25.0683	8.71251	11.9731	32.1453	26.7968	23.5381
LOC_Os03g61150	146.393	118.173	31.1913	33.1293	28.2812	126.841	214.964	32.2467	32.3225	30.0605
LOC_Os03g61160	4.07601	1.89598	0.318044	0.0467768	0.114433	2.60243	18.6406	0.117981	0.0919013	0.0464543
LOC_Os03g61360	1.58373	3.31304	1.25496	1.25303	1.21572	2.99421	3.37778	1.51947	1.04664	1.27572
LOC_Os03g61470	7.6611	5.9512	1.75417	1.77949	1.62099	2.88747	1.5919	1.34923	1.03056	1.07031
LOC_Os03g61670	3.3808	3.0988	5.47586	7.16399	8.93741	2.43835	2.49839	5.03516	8.82113	5.41408
LOC_Os03g61740	5.37817	6.69214	24.2619	29.9256	25.2147	3.85479	4.40767	23.8042	27.0828	19.7887
LOC_Os03g61920	12.5128	12.0126	7.29046	5.44736	7.0719	13.0009	14.4251	6.22047	6.24329	6.26619
LOC_Os03g62090	11.0723	12.9393	24.2999	30.0343	29.542	11.2375	11.2565	24.1733	31.0056	23.5229
LOC_Os03g62314	0.483437	0.161135	1.35833	0.910512	1.59069	0.229693	0.0308894	0.618894	1.26304	1.35719
LOC_Os03g62670	8.68169	10.8348	96.2138	124.489	101.718	8.87836	9.31275	109.938	111.976	123.853
LOC_Os03g62740	3.94006	4.92552	14.1712	15.0264	17.075	3.30871	4.31077	10.6662	18.8281	11.8211
LOC_Os03g63330	1.54365	2.3545	3.06589	3.90561	4.27681	1.10037	1.25007	2.58429	2.73114	2.96227
LOC_Os03g63390	31.8885	41.7281	70.2525	77.5541	63.0812	24.2937	33.8194	59.1491	71.6276	57.1547
LOC_Os03g63580	6.68973	4.8897	2.0337	0.0859548	1.57804	5.55714	8.05563	1.56515	1.46242	1.14174
LOC_Os03g63700	44.3925	34.1373	52.4204	59.8799	49.4989	32.8919	32.6312	71.574	68.151	69.8756
LOC_Os03g63940	185.889	171.533	77.1191	88.7514	80.453	238.506	249.006	90.2865	85.6894	93.6113
LOC_Os03g63970	5.83816	5.50551	13.8467	12.9586	12.3995	5.32165	5.24526	13.2604	14.2463	15.7825
LOC_Os03g64130	1.64984	1.03866	1.87672	1.68874	2.33886	0.862078	0.69112	1.9311	2.59867	2.47852
LOC_Os03g64170	5.84909	7.8832	26.2868	26.9577	25.6412	4.05743	5.17941	23.6158	35.7179	20.5519
LOC_Os03g64340	0.477621	0.268746	1.48509	1.63104	1.48281	0.37315	0.862422	1.2942	1.10702	1.02006
LOC_Os04g01470	0.295228	0.0657986	1.10469	0.554279	0.683563	0	0.227397	0.811437	0.553858	0.745857
LOC_Os04g01500	7.12382	8.36138	18.364	25.1759	27.8931	6.6972	8.24076	18.1849	26.9253	23.4402
LOC_Os04g01610	2.89179	3.41642	3.95592	4.88986	4.68925	1.82547	2.04304	3.7527	3.99104	3.26399
LOC_Os04g01740	5.90625	11.631	1.40401	5.25662	5.90815	19.4945	41.9608	1.13151	2.4293	1.46217
LOC_Os04g02050	34.4984	27.5091	74.7535	63.5709	67.9448	31.8662	24.1358	83.1503	83.5291	77.1931
LOC_Os04g02350	0.180717	0.123263	0.029687	0.0409895	0.040539	0.223879	0.305804	0.0158989	0.0256808	0.0337951
LOC_Os04g02520	0.101146	0.167707	0.372002	0.574186	0.708301	0.0191334	0.0566309	0.342275	0.856251	0.512878
LOC_Os04g02580	1.2546	1.40019	3.79171	5.85187	7.05784	2.55236	3.5485	8.90243	7.39757	10.0924
LOC_Os04g02650	6.66891	5.27236	1.32914	1.44228	1.5197	6.37828	8.07667	0.830567	1.75076	1.48184
LOC_Os04g02880	8.03626	5.92403	24.6716	31.5305	22.8921	7.65504	6.34181	31.883	26.3658	35.0468
LOC_Os04g03050	0.452638	0.359531	1.57224	1.54735	1.32853	0.414515	0.347857	1.23178	1.54841	1.59643
LOC_Os04g04060	0.963917	1.34373	2.1172	2.22311	2.07205	0.974569	0.939303	2.23633	2.73389	2.31877
LOC_Os04g05050	14.1946	18.6696	32.1111	45.465	35.1887	11.4908	12.3817	36.9425	41.1978	30.313
LOC_Os04g05700	0.248023	0.335725	0.615756	0.83304	0.600954	0.210998	0.368619	0.781581	0.617005	0.886976
LOC_Os04g06900	0.412082	0.332845	1.11809	0.823945	0.983517	0	0	0	0	0.0128103
LOC_Os04g07110	1.87188	1.09177	2.84	3.11623	2.82031	1.18541	0.975192	3.15947	2.7205	2.14031
LOC_Os04g07150	0.0650802	0.0618917	0.157599	0.162598	0.222994	0.0976023	0.0806243	0.126311	0.201375	0.153039
LOC_Os04g07920	0.512598	0.586482	0.988312	1.12943	1.12463	0.154918	0.13482	0.579275	0.279944	0.548393
LOC_Os04g08280	24.9269	33.8606	47.1584	63.9886	44.285	17.9351	14.8565	45.0578	53.4023	34.5362
LOC_Os04g08350	15.84	15.1259	34.2876	32.7568	31.5572	16.2557	14.4879	35.8315	35.9009	35.7234
LOC_Os04g08390	0.244355	0.267871	0.557701	0.493622	0.669359	0.123549	0.0604224	0.28936	0.498447	0.373856
LOC_Os04g09570	3.7285	3.31669	1.71591	1.80406	1.26063	3.40821	5.24902	1.58325	1.89479	1.97742
LOC_Os04g09900	0.620987	0.348737	1.74435	1.08222	1.71285	0.193697	0.329814	1.47017	0.949628	1.06685
LOC_Os04g10000	2.2701	2.10348	5.00659	3.03502	4.0536	1.04143	1.94269	4.10397	4.0882	3.29702
LOC_Os04g10010	2.79883	1.64015	4.7893	5.40658	5.28073	0.646959	0.747357	4.81888	3.35301	3.25708
LOC_Os04g10160	0.802088	0.657974	2.4618	1.55834	2.7538	0.458989	0.516447	1.78347	1.54878	1.59278
LOC_Os04g10690	11.8721	12.8592	0.747865	0.556681	0.351308	10.37	8.45507	1.05037	0.901803	0.518905
LOC_Os04g10890	0.274774	0.364204	0.0371303	0.0310425	0.113368	0.28183	0.241759	0.176664	0.153364	0.243918
LOC_Os04g11400	256.64	240.374	450.146	473.582	458.101	189.711	166.757	459.186	422.197	416.859
LOC_Os04g12060	4.633	3.78059	8.43693	8.82384	8.14088	3.00491	3.14178	6.85563	7.33796	7.39201
LOC_Os04g12070	0.346673	0.472055	0.717289	1.31693	0.687381	0.252699	0.190407	1.25891	0.701972	0.928067
LOC_Os04g12460	0.272866	0.248418	0.510408	0.653436	0.712799	0.232827	0.177781	0.531451	0.629458	0.628878
LOC_Os04g12499	8.87394	7.62953	3.94694	5.17317	4.24452	8.16509	9.45184	4.01033	3.96996	3.6436
LOC_Os04g12540	5.23312	5.20257	2.54189	2.32951	2.21657	3.79472	4.0741	2.50265	2.21448	2.25753
LOC_Os04g13590	0.409382	0.311135	1.02676	0.652678	0.556386	0.0832512	0.288076	0.661206	0.849912	0.854295
LOC_Os04g14690	59.2738	62.8107	36.4379	45.4522	42.1506	7.55263	8.26985	2.92022	2.86698	3.75109
LOC_Os04g15690	14.2857	11.5954	29.5757	20.7129	26.2245	9.3437	7.7828	23.6886	21.0463	19.8138
LOC_Os04g15800	0.264604	0.256242	0.59139	1.08753	1.86139	0.272331	0.312415	0.667406	1.20366	0.51271
LOC_Os04g16740	3.57869	3.53987	7.19235	8.48277	7.07481	6.01807	5.13958	8.66935	7.74803	8.03726
LOC_Os04g17100	336.804	245.509	84.2053	78.5684	84.623	310.62	349.816	84.9906	79.3963	83.497
LOC_Os04g17650	0.158983	0.158981	0.40534	0.394723	0.661022	0.196096	0.080923	0.274082	0.756456	0.430824
LOC_Os04g19740	8.76399	8.70858	2.91326	2.80506	2.96147	6.25186	7.22742	1.88423	1.671	1.91182
LOC_Os04g20400	6.01545	6.3392	2.71339	3.13136	2.79402	6.89022	7.61376	2.80551	2.88498	2.89432
LOC_Os04g20680	0.227232	0.243645	0.70471	0.437044	0.618721	0.190997	0.286296	0.58791	0.504242	0.641063
LOC_Os04g20749	5.74312	4.41717	0.35979	0.234717	0.110336	4.09186	5.49904	0.066273	0.24188	0.143767
LOC_Os04g22120	2.27337	1.47284	2.8843	1.97042	3.39617	0.967469	1.29279	3.12343	1.96094	2.35822
LOC_Os04g22910	0.0925695	0.134002	0.35457	0.337951	0.453442	0.0588125	0.0883518	0.233777	0.410955	0.276102
LOC_Os04g23550	17.3681	16.2221	1.5109	1.57345	1.37194	120.599	15.9483	4.05536	1.9291	1.87559
LOC_Os04g24430	1.07517	1.29898	4.13679	4.18951	6.26824	1.80676	1.74624	3.93731	6.00419	5.09587
LOC_Os04g24620	0.184135	0.11733	0.471202	0.437706	0.429382	0.176997	0.219754	0.408948	0.426751	0.874244
LOC_Os04g24804	14.8183	13.3406	0.805355	0.539604	1.63212	15.4803	17.336	0.812388	0.353742	1.14739
LOC_Os04g25440	37.2841	29.7331	10.5594	9.76091	10.3623	31.3568	39.3627	13.2246	13.3814	11.7778
LOC_Os04g27020	1.70579	1.20672	4.2506	3.09906	2.71137	0.590701	0.7466	3.0996	1.94626	1.98995
LOC_Os04g27190	7.84748	11.6648	2.31821	2.15262	1.81663	14.2092	19.0063	4.08547	4.28003	3.60541
LOC_Os04g27540	0.193945	0.272288	0.491307	0.475846	0.583422	0.118017	0.139204	0.468104	0.344882	0.389042
LOC_Os04g27670	18.6418	21.2786	2.27905	2.43669	1.99358	15.7679	22.2201	1.97862	2.27451	1.60781
LOC_Os04g27810	26.8896	19.0739	16.2426	7.73534	10.7256	24.0286	25.3061	11.683	12.0059	11.3737
LOC_Os04g28260	0.292855	0.395156	0.652341	0.674285	1.14659	0.267703	0.289753	0.432873	0.788326	0.457339
LOC_Os04g28280	2.18222	2.18008	3.61581	4.42979	2.46013	0.973671	1.17966	4.15808	5.62599	2.74549
LOC_Os04g28420	24.6698	24.9699	16.5878	26.2807	35.8323	83.462	71.2926	22.6118	32.8952	22.2991
LOC_Os04g28520	3.66512	4.31544	15.9177	22.6086	14.1719	3.82216	3.32077	13.8647	18.1861	15.1299
LOC_Os04g28570	0.118489	0.216843	0.239993	0.0694039	0.0213638	0.387986	0.3344	0.0539576	0.123073	0.1303
LOC_Os04g28780	0.314519	0.44837	0.80892	0.683262	0.886022	0.275922	0.167645	0.747176	0.562322	0.605788
LOC_Os04g29550	21.5701	14.1818	32.3998	31.6511	35.4163	16.1845	14.2374	40.6401	41.6973	38.443
LOC_Os04g29580	1.02162	0.783283	1.39708	0.894191	1.48054	0.573788	0.600059	1.31783	1.15743	1.09144
LOC_Os04g29680	2.5762	2.81046	12.5366	9.99101	12.1578	1.52212	1.59878	9.02283	9.7051	9.75062
LOC_Os04g29960	0.544324	0.62611	0.907413	0.612307	1.04405	0.231225	0.152892	0.692333	0.69774	0.768807
LOC_Os04g30030	2.7229	1.84872	5.52169	4.49307	6.48157	2.32623	2.12513	7.39911	6.94796	5.32962
LOC_Os04g30040	3.97523	3.51418	13.7228	13.3834	15.1777	3.79843	2.7779	17.7625	16.3789	16.4638
LOC_Os04g30720	0.0861342	0.132548	0.363855	0.548624	0.718556	0.102861	0.106574	0.228791	0.629547	0.290723
LOC_Os04g30800	6.29042	6.33474	9.05215	14.2918	13.2227	5.31466	4.40169	9.07268	12.223	11.1953
LOC_Os04g31350	4.00775	5.176	10.7497	12.5458	12.4019	3.4897	2.41666	11.5371	9.6986	10.0399
LOC_Os04g31410	29.2172	39.6754	77.3091	99.3443	79.1676	24.3665	28.129	75.2291	84.2659	63.8216
LOC_Os04g31484	6.11905	2.27765	21.9227	24.4145	22.3057	6.005	1.72744	23.6384	23.7197	12.6576
LOC_Os04g31520	44.5761	54.8468	121.749	98.4484	106.513	29.9009	27.3962	83.234	123.617	66.7047
LOC_Os04g31710	5.2603	5.17005	0.0930146	0.429745	0.360742	4.16725	10.5769	0.24089	0.0941537	0.262781
LOC_Os04g31940	1.83493	1.61787	1.00808	0.0944603	0.558067	1.72716	1.6932	1.8465	0.610492	1.86947
LOC_Os04g32030	10.7125	15.7198	24.7177	27.7215	30.6676	11.7237	13.4764	26.0379	35.3376	21.6468
LOC_Os04g32110	75.6325	59.9483	28.387	32.9755	24.8822	82.2755	79.4021	36.4022	33.6421	41.8306
LOC_Os04g32320	3.14397	2.95279	0.10373	0.0824656	0.173967	1.83879	3.86334	0.148517	0.0726388	0.16597
LOC_Os04g32540	1.98882	3.36517	4.37649	5.64631	8.00823	1.46542	2.07381	5.19655	6.16519	5.10863
LOC_Os04g32800	35.4387	32.5885	93.6962	106.698	86.8696	27.8901	24.9341	93.0613	78.1394	87.8971
LOC_Os04g32920	8.57978	5.36481	17.237	15.3485	15.3598	6.71155	4.83605	21.5594	17.747	19.0244
LOC_Os04g32980	20.9556	18.4765	8.94566	8.02961	6.82078	25.2555	24.591	10.7136	11.2122	10.5751
LOC_Os04g33060	33.0136	33.1615	52.849	58.2228	58.7899	32.1179	27.3011	63.8759	60.8559	62.9368
LOC_Os04g33600	2.00167	1.85407	2.97012	2.6694	3.38824	1.76646	1.64347	2.99231	3.26027	4.1466
LOC_Os04g33740	0.0455941	0.072739	1.72465	2.17153	2.83721	0.0223561	0.0563106	1.47156	3.09365	1.70571
LOC_Os04g33820	5.80768	5.90155	1.97534	3.4088	3.45541	13.5377	7.96611	2.86143	2.756	3.03616
LOC_Os04g33900	20.5484	29.5848	33.3969	58.3471	41.1879	20.0742	18.8571	42.5019	37.9808	44.2965
LOC_Os04g33920	27.5543	24.3579	0.664953	0.516579	1.52584	33.4973	46.9256	0.292608	0.226715	0.313675
LOC_Os04g33990	264.329	306.486	454.5	559.358	438.721	219.557	219.57	510.361	518.684	445.687
LOC_Os04g34170	14.6881	16.0694	27.915	41.0667	44.1886	13.3458	13.7301	25.7045	29.9829	20.372
LOC_Os04g34230	0.690446	0.364999	1.76515	1.62698	1.54758	0.496723	0.375116	2.0438	1.30678	2.01281
LOC_Os04g34240	0.18201	0.218499	2.57304	2.90487	6.20574	0.0909271	0.0859474	1.60028	5.53851	1.18277
LOC_Os04g34270	0.826077	0.970637	2.35348	1.58406	1.62197	1.10606	0.593351	1.77068	2.03169	2.05977
LOC_Os04g34610	337.023	340.43	65.7108	79.3986	71.0652	314.079	374.625	79.1652	73.5553	76.2406
LOC_Os04g35100	51.1207	41.7598	5.61505	5.91244	5.78398	46.6245	48.5703	4.26647	5.46066	4.17226
LOC_Os04g35210	2.83461	2.76327	2.60667	2.66779	3.37262	2.76143	2.07445	2.67524	2.91287	2.09005
LOC_Os04g35500	3.557	6.2344	2.50263	1.9632	2.62744	3.73698	5.26117	1.36598	3.32578	1.31294
LOC_Os04g35520	49.4109	42.3606	73.2595	66.1935	73.434	34.4198	27.7362	67.6743	61.6461	69.6929
LOC_Os04g36070	1.35785	1.6429	7.04884	8.43983	7.49789	2.04779	1.9497	6.62473	7.04323	6.96087
LOC_Os04g36600	101.791	99.7685	32.5509	31.6942	30.4554	105.608	125.077	30.6549	35.0321	37.8065
LOC_Os04g36750	7.26515	17.6518	0.531158	0.424905	0.217772	8.05254	18.8736	0.32878	0.46644	0.212438
LOC_Os04g36820	8.68072	13.017	19.3441	25.3513	21.5263	9.44145	14.306	24.781	29.6167	17.0879
LOC_Os04g37480	3.12786	3.66827	11.427	13.5901	10.4909	2.4568	2.17922	9.60162	11.8907	8.75743
LOC_Os04g37710	126.675	115.158	72.036	67.074	64.4891	182.991	108.593	66.1417	68.3343	64.2786
LOC_Os04g37770	2.31578	2.40709	25.2033	29.8462	50.1711	6.14471	6.82459	13.2522	28.1047	34.7058
LOC_Os04g37880	14.6052	9.51463	1.66644	2.65569	2.95353	13.4925	14.0932	3.1583	4.00424	3.81533
LOC_Os04g37990	1.08058	1.40633	2.25979	2.70316	1.80055	0.968254	0.742995	2.47242	2.21658	2.66682
LOC_Os04g38410	421.938	389.233	732.248	786.863	675.259	428.254	393.742	793.698	736.545	831.321
LOC_Os04g38530	0.499571	0.726669	1.15778	1.05914	1.68358	0.363474	0.405596	1.10434	1.07933	0.806167
LOC_Os04g38600	158.349	136.864	374.105	338.021	311.109	149.733	134.13	356.844	354.241	354.369
LOC_Os04g38780	0.35949	0.449219	0.218087	0.223285	0.209041	0.607807	0.574935	0.263064	0.300428	0.308048
LOC_Os04g38810	0.617983	1.26089	1.76711	2.22746	3.01099	0.394284	0.565829	1.64024	2.70288	1.19413
LOC_Os04g38850	10.2966	8.6354	19.0296	17.6803	15.4239	11.2655	9.92222	23.3525	20.0671	22.2608
LOC_Os04g39110	14.0298	29.3747	47.0516	56.165	86.0027	13.0392	23.5805	49.5678	102.011	37.6378
LOC_Os04g39150	226.199	362.671	588.875	678.844	677.182	187.709	240.804	522.136	755.806	476.29
LOC_Os04g39300	4.69731	3.40878	6.502	4.29894	7.94164	0.926096	2.0538	5.53057	6.70495	7.1629
LOC_Os04g39320	16.2163	9.38279	52.8165	29.231	35.2821	10.1248	9.71088	46.4805	33.9092	32.8267
LOC_Os04g39380	0.785837	0.905172	5.06711	5.13396	4.83734	0.367387	0.343976	3.15396	3.49286	3.89795
LOC_Os04g39610	1.00193	1.68762	5.05839	5.32588	7.19668	0.725791	0.786794	4.02216	7.9363	4.00099
LOC_Os04g39670	0.0823144	0.131755	0.420276	0.857927	1.39634	0.0827464	0.132687	0.278908	1.16678	0.319199
LOC_Os04g39880	4.12978	6.97663	8.40902	9.73658	10.013	4.72065	4.50203	10.1213	9.8388	9.1931
LOC_Os04g39980	12.4748	12.919	7.77825	6.42217	7.0413	19.7334	15.0263	6.15107	5.65715	6.95695
LOC_Os04g40070	1.25007	1.11846	0.23412	0.286258	0.307003	1.25145	1.57749	0.239144	0.269084	0.183618
LOC_Os04g40410	18.1848	15.1054	62.7035	66.0966	79.6812	9.59337	4.51603	40.7707	43.8767	61.3062
LOC_Os04g40440	0.872744	0.950044	1.48671	0.959902	1.33935	0.455659	0.459562	1.10086	0.848401	1.0124
LOC_Os04g40510	1.79466	2.1907	5.07724	4.82296	4.24623	2.05233	1.92523	4.28569	6.08227	3.64117
LOC_Os04g40560	9.09352	13.8462	4.25935	4.29114	4.72439	8.31637	12.7341	5.38296	7.87509	5.54041
LOC_Os04g40590	4.63727	4.75844	1.75484	0.641903	0.618479	3.04034	4.89797	1.86301	1.26004	1.11535
LOC_Os04g40630	109.304	119.187	248.058	257.537	241.001	118.155	97.142	323.122	265.278	320.633
LOC_Os04g40700	13.5449	14.1053	7.38986	7.95632	8.02536	17.3421	13.2448	7.4745	8.01722	7.10253
LOC_Os04g40940	0.74161	0.891149	1.26056	2.19625	3.41187	0.208598	0.396559	1.38882	2.19147	1.30788
LOC_Os04g40990	24.228	24.4368	7.10471	4.28066	2.56123	53.3881	60.9687	6.6207	7.1688	5.23091
LOC_Os04g41350	1.48676	0.825059	4.03855	3.98613	4.34387	1.12976	1.91916	5.62726	3.98982	3.22049
LOC_Os04g41620	102.841	138.061	46.9639	44.3054	74.7638	66.7326	100.81	20.7049	39.1481	28.411
LOC_Os04g41640	1970.16	2447.96	856.494	789.063	1309.77	1255.57	1879.18	437.168	657.959	648.088
LOC_Os04g41810	14.2781	13.5205	21.0007	29.0619	30.9436	9.83175	11.8613	20.1283	28.6928	22.7411
LOC_Os04g41860	3.12034	3.17418	8.76694	4.56425	5.62389	3.61592	3.33381	7.98889	9.66223	6.00927
LOC_Os04g41900	0.613923	0.734273	8.45312	12.776	24.7514	0.364121	0	7.79357	21.9436	7.45924
LOC_Os04g41960	113.016	91.7417	22.4968	23.2574	24.4762	469.861	93.0113	20.7932	20.5276	24.4289
LOC_Os04g42130	0.298235	0.436833	0.712033	0.842574	0.799508	0.673382	0.57226	1.04151	1.45417	1.55416
LOC_Os04g42520	6.23055	7.52516	14.3896	16.6453	16.3389	6.41969	5.82219	13.1159	15.6555	11.2062
LOC_Os04g42540	0	0	3.40658	2.33317	6.5199	0.173722	0.113889	2.17282	4.0218	1.46551
LOC_Os04g42620	26.4366	32.5106	48.596	69.1146	50.3575	22.9868	26.5565	53.4386	56.1311	51.3041
LOC_Os04g42720	0.374078	0.641386	1.52135	2.15116	2.65952	0.643049	0.562529	1.68359	2.34983	1.52647
LOC_Os04g42860	2.45068	4.34721	7.48612	6.79934	12.9898	1.37366	2.69199	6.29062	15.7316	4.11073
LOC_Os04g42950	6.64068	5.95954	1.67335	1.34832	0.798693	4.41596	5.15249	1.16122	0.782402	1.08903
LOC_Os04g43200	87.3587	89.4189	6.73102	4.91807	6.74951	92.4735	108.819	4.01503	4.20048	4.15582
LOC_Os04g43230	0.149308	0.233068	0.752675	0.748411	1.15929	0.16772	0.118688	0.66155	1.15448	0.447521
LOC_Os04g43390	123.137	130.932	61.6626	58.761	56.3634	181.507	188.065	60.319	57.5415	55.8121
LOC_Os04g43519	2.64286	1.98741	0.88751	0.406274	0.570884	1.57811	2.62854	0.867453	0.587683	0.666272
LOC_Os04g43710	45.6011	41.8731	9.73344	12.9816	12.1972	43.057	48.7394	10.768	13.0681	12.5275
LOC_Os04g44210	2.74482	2.94964	6.88601	6.56528	6.4201	3.24171	2.62554	7.48863	6.62449	6.49633
LOC_Os04g44240	1.2998	0.788949	1.72178	1.47342	1.20624	0.345763	0.349969	1.32975	1.20637	1.06993
LOC_Os04g44320	7.59101	7.45259	14.8031	12.4482	12.2187	3.53473	3.96943	11.7318	10.2297	10.8084
LOC_Os04g44354	1.71783	1.51273	4.14098	3.86375	2.8358	1.92655	1.87609	4.8663	4.57999	4.96623
LOC_Os04g44500	58.0731	49.556	10.2647	8.31532	11.9948	43.8588	65.7432	12.101	9.89615	11.6142
LOC_Os04g44830	68.6139	73.1297	35.6299	37.5558	36.7745	74.5987	78.916	34.0037	34.9227	35.5782
LOC_Os04g44850	12.894	11.2057	22.3547	24.7393	20.6221	12.653	11.1532	22.613	24.9974	29.6433
LOC_Os04g45000	7.77978	8.4803	27.0613	24.9807	26.0376	7.02626	7.17629	24.8489	24.2689	24.5023
LOC_Os04g45340	0.144628	0.217824	0.946271	1.28479	1.00737	0.143887	0.211957	0.970471	1.47353	1.11086
LOC_Os04g45690	4.46066	2.9249	11.3791	10.5688	10.3461	4.22548	4.91736	12.4619	14.2675	14.8684
LOC_Os04g45720	1.78681	2.77828	4.39758	5.85049	7.35391	1.3282	2.09773	4.06894	7.03273	3.60636
LOC_Os04g45810	177.16	160.121	28.647	25.9707	26.7415	147.697	211.481	24.4857	23.4221	24.0731
LOC_Os04g45900	16.7661	14.5965	28.4556	26.6654	25.3529	14.6167	12.1261	27.9233	24.4247	26.1946
LOC_Os04g46110	17.9068	32.3744	53.8658	72.1194	60.2943	19.4518	20.2136	65.8446	87.3653	62.251
LOC_Os04g46130	24.4186	31.7623	49.8584	69.2571	62.2957	20.857	26.6469	47.8706	57.7433	61.7789
LOC_Os04g46220	10.225	10.2857	5.16029	3.90115	5.33307	22.5219	10.675	7.01319	6.50496	7.09879
LOC_Os04g46560	2.12015	2.00224	5.8874	6.42801	5.92572	2.44307	1.84715	5.37318	8.13767	5.18752
LOC_Os04g46730	8.51247	13.6992	20.9698	29.5278	36.0335	11.6399	8.80326	25.8349	37.0082	23.1762
LOC_Os04g46830	12.3798	17.1399	59.696	51.918	67.8094	11.0291	11.0611	48.8458	91.3895	58.1583
LOC_Os04g46990	2.11678	1.28909	5.46647	5.71202	3.57555	2.14157	1.13783	4.4615	4.46693	4.86013
LOC_Os04g47140	114.558	98.5666	26.2353	24.699	22.2663	125.79	105.373	29.7166	26.7593	27.4448
LOC_Os04g47170	0.575604	0.63194	0.308929	0.260095	0.22963	0.615093	0.479132	0.264541	0.191196	0.266175
LOC_Os04g47250	6.79282	11.4702	14.8447	21.7192	15.3554	6.11007	8.69134	17.4296	23.9873	14.685
LOC_Os04g47300	2.68474	2.71593	5.12358	5.61534	5.07548	2.22494	2.07935	6.16022	6.19437	5.76333
LOC_Os04g47420	4.2887	4.60718	20.3228	20.9124	17.9887	3.06451	3.32114	23.4508	19.657	19.8686
LOC_Os04g47810	0.0974878	0.0898076	0.426211	0.677181	0.235471	0.067308	0.0201376	0.137075	0.21818	0.145182
LOC_Os04g48070	4.80044	5.13333	1.22025	1.40393	1.52743	5.42946	5.33884	1.22426	1.42308	1.1848
LOC_Os04g48260	4.30227	5.44763	2.09153	2.22231	2.14171	3.80423	5.15227	2.36943	3.00606	1.86253
LOC_Os04g48270	28.801	23.7978	8.12003	8.90276	8.61174	29.7159	33.4757	8.49192	9.14902	7.96899
LOC_Os04g48290	1.09443	1.28676	0.666123	0.337162	0.648054	5.78281	0.691116	0.457083	0.314545	0.547392
LOC_Os04g48416	5.16508	7.32173	16.0497	18.4689	20.6826	3.86587	4.91706	13.1835	23.4333	11.2895
LOC_Os04g48760	0.102354	0.11291	0.559886	0.416912	1.06759	0.0465523	0.0302632	0.25077	0.855137	0.186923
LOC_Os04g48830	1.95721	2.8046	3.87386	5.26128	4.46699	2.20441	2.67235	4.84458	6.82776	3.88345
LOC_Os04g48930	0.174606	0.510593	3.49626	3.64316	4.77784	0.242223	0.0947571	5.11746	3.30419	6.15451
LOC_Os04g49130	0.969767	0.715087	1.78276	1.56293	2.12189	0.581152	0.633102	1.10917	1.54453	0.804188
LOC_Os04g49210	2.70388	2.39459	9.73562	14.7007	16.5087	5.70644	5.33694	8.80263	8.53916	8.76923
LOC_Os04g49360	2.68505	2.51865	1.17796	0.263026	0.223196	3.26933	3.54525	0.84162	0.463605	0.629571
LOC_Os04g49370	1.77399	1.19628	0.762777	0.767935	0.348753	2.03084	1.93071	0.501285	0.380866	0.556116
LOC_Os04g49420	5.69712	7.22717	13.5717	17.6184	28.2581	4.36881	5.63549	12.9471	25.3431	10.5179
LOC_Os04g49490	0.722575	0.854991	1.21257	1.38604	1.3764	0.743307	0.421771	1.55342	1.59425	1.12962
LOC_Os04g49560	1.10608	1.77063	3.63762	4.00999	5.27055	1.51505	1.41299	3.30148	4.09437	3.16694
LOC_Os04g49650	6.28298	4.20416	6.47823	7.93203	7.44584	5.35034	3.88729	8.91956	8.19308	10.1282
LOC_Os04g49680	42.4047	37.1498	18.6613	15.4977	19.741	35.6914	36.9498	20.6664	21.7226	18.6826
LOC_Os04g49700	0.837311	0.862474	1.17546	1.51503	1.87281	0.576092	0.914895	1.51958	2.34508	1.69569
LOC_Os04g49950	0.277946	0.206535	0.749452	0.451373	0.875641	0.214999	0.179555	0.911542	1.04688	0.930393
LOC_Os04g49980	27.4217	21.947	2.1789	1.7299	1.2969	20.5765	31.0252	1.50035	1.70306	1.19157
LOC_Os04g50204	9.60538	10.7024	17.1791	21.913	19.1926	9.41186	8.84182	18.9784	22.4813	17.9965
LOC_Os04g50960	0.103059	0.121056	0.675417	1.05416	2.12553	0.0155227	0.0471031	0.534959	1.60782	0.414102
LOC_Os04g51030	0.962335	1.03263	2.041	1.54945	1.76476	0.710246	0.820903	1.93932	1.66409	1.54711
LOC_Os04g51040	1.63959	1.08368	3.45814	2.68773	3.29996	0.893763	1.01839	2.50681	2.3682	2.54263
LOC_Os04g51130	2.46918	1.96336	0.883836	0.733003	0.914879	2.72504	2.08316	0.853361	0.685213	0.724471
LOC_Os04g51160	22.0445	17.4974	10.528	6.4715	8.52805	21.465	14.8571	8.06861	5.45311	8.94758
LOC_Os04g51340	1.21367	1.21317	4.46424	7.07558	7.00914	1.05259	0.853884	5.35293	6.51537	5.66875
LOC_Os04g51410	72.8043	63.9451	27.1451	27.3177	24.7882	63.4635	60.6846	27.9793	28.5114	28.0557
LOC_Os04g51460	1.25672	1.10826	3.56346	4.11478	3.38753	1.74283	1.32121	2.61175	4.73663	4.19317
LOC_Os04g51610	62.3767	57.6013	17.6888	18.5483	19.6858	71.9755	73.1195	16.6362	18.1598	18.2764
LOC_Os04g51660	4.10926	3.43439	0.929068	0.855552	0.842404	4.00235	4.12261	0.800389	0.302826	1.27806
LOC_Os04g51796	1.58033	1.36967	0.012988	0.015047	0.0508791	1.43563	2.04241	0	0.013821	0.0123148
LOC_Os04g51820	5.91389	5.38951	1.49014	1.78461	1.1687	9.38381	8.00304	1.87698	1.79604	1.72635
LOC_Os04g51830	0.930359	0.78245	1.62956	2.05706	1.41607	0.735398	0.719905	1.04232	1.69795	1.58875
LOC_Os04g51930	0.31158	0.346584	0.14462	0.144018	0.108762	0.174341	0.233633	0.0866808	0.0953962	0.0857332
LOC_Os04g51980	2.04487	1.46068	9.50655	8.5256	7.22809	1.81452	1.11489	7.30355	11.2415	6.32806
LOC_Os04g51990	5.60166	5.22872	8.04373	10.7757	8.50104	4.21184	5.86022	13.504	8.58741	9.62601
LOC_Os04g52090	41.0319	32.5288	13.5631	14.8449	15.9452	121.512	21.5857	17.7799	28.3009	26.4102
LOC_Os04g52110	2.76544	1.40496	0.0582625	0.0673708	0.0570085	1.74526	7.59075	0.0511019	0.0602382	0.0539122
LOC_Os04g52250	1.67199	2.84947	17.3907	10.8936	11.8703	2.83508	5.03351	11.8467	17.0635	22.4428
LOC_Os04g52260	80.2093	65.3954	186.378	180.095	160.785	64.5953	50.8925	207.043	225.783	201.896
LOC_Os04g52310	0.372751	0.399846	3.24825	3.47687	4.22682	0.346614	0.332016	1.9751	1.61789	1.48393
LOC_Os04g52320	6.87936	6.58074	13.2309	15.5584	12.7425	6.57783	5.82071	15.9531	17.5417	14.2737
LOC_Os04g52390	20.2556	19.8851	9.59873	10.4298	10.902	20.7241	20.7857	10.2854	10.6281	10.2235
LOC_Os04g52440	0.23766	0.134263	0.663228	0.382969	0.358218	0.205634	0.0966617	0.411539	0.661266	0.474499
LOC_Os04g52780	0.216481	0.220046	0.79439	0.56303	0.57505	0.109203	0.198328	1.02411	0.849596	0.594803
LOC_Os04g52820	7.31298	8.60336	18.0639	21.841	23.224	7.12013	6.86581	15.9553	23.8586	15.9274
LOC_Os04g52950	33.1201	35.4813	12.9798	17.3074	16.1659	30.914	26.8499	14.6476	13.951	16.2073
LOC_Os04g53180	43.8402	53.9839	112.445	117.854	99.9931	37.1437	40.4467	93.4694	95.7322	104.709
LOC_Os04g53730	1.05782	2.82759	4.24753	5.90606	3.98529	0.997416	1.39945	3.93873	4.23483	2.83358
LOC_Os04g53750	2.27601	1.94109	0.955045	0.948422	0.956183	2.13516	2.50819	1.02956	0.946025	0.852513
LOC_Os04g53860	1.08055	1.06291	2.22225	2.09722	2.71683	1.42043	1.12635	2.80188	2.83419	2.73844
LOC_Os04g53930	3.87472	3.90182	0.980896	0.809471	1.71764	3.07695	2.30594	1.57309	1.19419	1.53902
LOC_Os04g53950	3.11349	5.30647	12.2915	19.2656	31.053	1.68076	2.3855	16.7976	29.1571	11.1039
LOC_Os04g53990	6.74732	4.47453	2.11293	2.63834	2.10099	6.80468	5.22665	2.58092	1.8897	1.90953
LOC_Os04g54210	243.869	227.12	52.036	27.4082	31.2831	401.689	372.925	46.2176	58.9689	47.8425
LOC_Os04g54240	1.60278	1.20633	8.96172	8.55722	11.6009	1.40612	0.743908	9.31202	16.3818	4.83937
LOC_Os04g54520	0.0372661	0.0134633	0.308737	0.180699	0.305301	0.133837	0.228262	0.451544	0.491292	0.208557
LOC_Os04g54620	59.6182	57.9424	70.7443	68.2974	79.6579	47.4241	30.7965	60.3595	102.29	49.2383
LOC_Os04g54810	7.50566	8.32732	22.0992	38.9951	28.3681	7.27504	7.91722	24.155	33.1127	23.5203
LOC_Os04g54930	3.21146	3.47466	10.1724	9.89988	8.65711	2.03139	1.40442	6.91833	9.41304	3.48958
LOC_Os04g54940	1.64733	1.71784	3.86634	3.70324	3.87021	1.46136	1.1863	3.07866	4.45229	2.21972
LOC_Os04g55159	23.7553	40.4806	91.1999	185.07	125.486	31.2552	33.5456	136.039	129.171	164.918
LOC_Os04g55200	7.64587	7.73189	3.04384	2.94426	3.48644	8.75117	10.2921	2.30099	2.86305	2.06634
LOC_Os04g55280	1.19813	1.99241	2.14107	2.5797	3.00244	1.25097	1.63564	2.94179	3.13261	2.45724
LOC_Os04g55520	69.3602	48.3963	27.4739	26.6679	25.7619	60.9854	60.1741	29.2312	28.4453	29.3826
LOC_Os04g55850	52.7707	43.2003	18.73	17.9562	17.5639	42.7279	41.0352	16.4997	18.601	15.0298
LOC_Os04g55950	10.8111	11.5267	3.66045	1.26184	4.22853	9.8765	12.4677	1.31551	1.80966	2.10364
LOC_Os04g56170	3.13647	3.92624	6.18839	5.63096	5.79985	4.00136	3.51316	6.63286	8.73257	6.8107
LOC_Os04g56180	1.319	0.658785	5.31438	6.41283	4.49552	0.956435	0.751295	6.40177	6.4098	3.64815
LOC_Os04g56230	15.7545	16.7675	34.6146	36.8581	34.7385	17.9826	17.5094	37.2449	32.6329	33.3852
LOC_Os04g56309	4.55248	4.29275	0.137517	0	0.133934	5.82011	2.85673	0.121574	0.427973	0
LOC_Os04g56390	5.90392	4.78112	10.5666	10.9279	8.85126	5.07597	3.4232	9.60435	10.2194	7.8904
LOC_Os04g56470	0.2781	0.193544	0.688775	1.14279	1.23589	0.129275	0.0941551	1.04962	0.912178	0.769609
LOC_Os04g56680	1.59231	1.45315	4.94166	5.71118	7.27669	1.44582	1.52582	4.92116	7.68112	3.04918
LOC_Os04g57440	20.2697	21.1174	11.9327	11.7349	13.5318	24.3249	23.3776	10.8085	13.2541	10.5018
LOC_Os04g57550	48.5268	40.8887	26.4181	21.2357	22.7077	63.0096	46.4835	23.6056	22.2235	23.8068
LOC_Os04g57630	1.69445	2.08097	3.07854	2.98287	2.81415	1.1912	1.31743	2.91408	2.98061	2.53227
LOC_Os04g57650	1.55679	2.57186	3.4873	5.54769	4.37096	1.47329	1.38472	3.18035	5.15541	2.72695
LOC_Os04g57720	1.29749	1.7346	4.1644	4.28631	4.38979	1.50639	1.18544	3.43244	5.16701	2.96611
LOC_Os04g58030	2.77291	2.95776	0.791046	0.664819	1.14026	3.12584	3.23717	1.08532	0.810883	0.89897
LOC_Os04g58280	115.951	80.8583	36.993	33.3884	32.8836	120.403	108.425	38.7151	35.4757	34.0619
LOC_Os04g58470	4.00476	5.52614	6.54102	7.81542	8.89554	3.46718	3.69552	7.07524	8.55567	6.53946
LOC_Os04g58710	108.986	85.6853	24.6197	23.2963	20.1307	105.385	75.0321	17.7369	21.7229	22.7719
LOC_Os04g58720	0.368351	0.893289	1.13798	1.14305	1.81562	0.320383	0.45616	0.952498	1.83514	0.775836
LOC_Os04g58810	9.49434	5.68172	2.74688	1.63389	2.90493	34.0112	2.60345	2.3957	3.98538	3.1578
LOC_Os04g58860	24.5227	32.2728	59.3228	67.848	57.4377	23.5839	28.3004	60.3271	62.3085	62.2267
LOC_Os04g58890	59.7	55.8348	28.8923	27.1031	22.1526	93.0522	66.6975	27.9426	29.7163	32.8504
LOC_Os04g59120	0.340424	0.986853	2.50511	1.26511	1.69852	0.68156	0.463971	2.99013	2.38251	2.09846
LOC_Os04g59150	4.72517	2.74832	7.51634	6.89314	7.90629	2.97123	3.61368	6.64606	7.39257	7.60213
LOC_Os04g59190	11.9103	13.9405	5.7078	3.04758	6.39547	11.7867	15.0248	4.56621	6.16679	4.93172
LOC_Os04g59200	0.732692	0.526092	2.06696	1.63271	1.15377	0.330522	0.429671	4.85552	3.16653	2.36963
LOC_Os04g59310	0.471651	0.913832	1.78314	2.58998	3.03728	0.253544	0.484443	1.42655	3.43177	2.23763
LOC_Os04g59320	1.22185	2.20035	2.93388	3.83878	4.28388	1.70888	1.42182	2.98908	4.16906	2.32989
LOC_Os04g59330	51.3728	51.9717	96.4533	103.261	96.7249	37.5138	36.4263	92.109	112.375	98.1303
LOC_Os04g59370	1.05267	0.524573	1.87464	1.93654	1.63034	0.855035	0.622118	1.79508	2.60423	1.77841
LOC_Os04g59380	1.78551	1.76572	3.13322	3.54944	4.14814	1.62947	1.6819	2.94558	3.83908	3.52099
LOC_Os04g59540	8.45737	7.47887	1.79261	1.59592	1.45784	7.01197	9.21546	1.5729	1.69432	1.20978
LOC_Os05g01140	3.53365	3.04131	8.58404	10.1525	9.94144	2.50764	2.958	9.67843	9.96269	8.63046
LOC_Os05g01730	2.7142	2.4326	7.13632	7.44108	8.86262	2.19339	2.66586	8.4569	8.39926	8.57068
LOC_Os05g01810	19.5611	22.9717	53.3521	61.1029	60.8378	19.0459	21.7086	47.5077	68.601	50.1132
LOC_Os05g02150	1.54423	1.21221	2.40933	3.9507	2.75404	1.38049	1.69959	2.75788	2.83873	2.49745
LOC_Os05g02250	56.8693	59.5318	117.419	119.728	114.214	47.2843	47.93	115.682	114.367	116.486
LOC_Os05g02300	3.60427	3.59	20.2388	23.4857	46.001	3.00489	2.4632	17.3571	41.1015	11.4618
LOC_Os05g02310	29.1464	32.0083	57.9113	59.0624	61.3144	22.4845	25.6729	63.7051	75.6095	50.7123
LOC_Os05g02390	0.966179	1.97475	1.50525	0.441583	0.222419	2.7749	2.66414	0.266411	0.371063	0.49817
LOC_Os05g02770	69.8601	54.4683	35.0706	25.566	32.5436	71.2895	61.6976	29.6879	32.3105	30.0316
LOC_Os05g02820	7.69176	10.8954	15.0838	17.8257	18.0265	7.91194	7.63747	14.4509	19.5048	14.9427
LOC_Os05g02890	11.4561	8.44432	21.7807	19.4104	16.6878	7.2615	7.11524	17.408	17.2769	18.2192
LOC_Os05g02900	1.52252	3.38065	5.29309	6.4303	7.45182	1.00727	2.10115	4.05613	6.69278	3.17834
LOC_Os05g03130	37.0102	26.0624	1.1307	1.53261	1.5184	28.5843	46.9745	1.16231	1.04772	0.649532
LOC_Os05g03440	1.64358	2.23377	1.87847	2.63718	3.32253	1.46802	1.53366	2.6171	4.18869	2.62327
LOC_Os05g03760	166.752	130.625	73.9163	68.8437	66.823	331.083	139.943	86.4338	85.9341	96.1813
LOC_Os05g03920	13.8577	8.80752	1.10405	1.05995	0.981755	14.4845	13.6112	0.861937	0.777122	1.22718
LOC_Os05g03972	0.49747	0.549735	2.76042	5.27757	3.94293	0.431902	0.51347	3.39589	5.01267	3.08447
LOC_Os05g04020	2.30216	2.55145	8.16586	9.66473	10.9214	1.94284	2.07568	6.31715	10.9722	11.7177
LOC_Os05g04170	38.2571	54.0469	97.3207	110.856	90.7928	38.9893	38.2125	84.6104	103.197	77.7342
LOC_Os05g04380	105.012	115.709	206.323	236.993	205.1	100.995	104.663	219.249	239.963	211.823
LOC_Os05g04600	4.72266	5.20387	10.3844	11.3033	9.90507	4.72216	3.79484	9.29843	11.1201	9.09555
LOC_Os05g04700	700.388	437.205	190.396	179.344	173.479	562.153	572.768	163.335	161.587	165.288
LOC_Os05g04710	34.3105	2.08352	44.0968	0.42272	18.1575	2.24744	2.30346	0.735261	1.0782	0.739237
LOC_Os05g04820	2.46551	3.42193	7.89827	9.8548	7.64095	2.5462	2.41544	8.43122	10.6474	7.68724
LOC_Os05g05060	134.63	118.026	59.0428	56.7452	57.3249	120.85	113.551	65.2213	59.3004	64.0232
LOC_Os05g05170	1.2718	2.07503	2.9989	5.43313	2.64529	1.42352	1.83893	4.05779	4.3147	5.493
LOC_Os05g05670	4.49679	3.30892	7.80066	7.05839	7.4316	2.55162	3.56571	7.89493	8.43778	7.16157
LOC_Os05g05680	46.8099	40.543	126.849	96.5295	105.172	30.8413	29.1607	110.229	101.23	104.269
LOC_Os05g05930	17.376	14.6156	0.180897	0	0.173555	16.9807	30.1331	0	0	0
LOC_Os05g06399	34.6352	36.9504	5.04176	8.14614	8.28228	40.2528	43.7431	6.73952	4.42075	5.43093
LOC_Os05g07090	16.1932	15.6798	10.1119	7.27694	7.80336	20.753	19.5073	8.17119	8.4092	7.58554
LOC_Os05g07420	0.148418	0.0668219	0.292895	0.112935	0.198994	0.109199	0.132811	0.304658	0.445287	0.313657
LOC_Os05g07764	1.23772	1.53613	3.81226	4.00883	5.09312	1.01847	0.808497	2.7945	4.67966	3.18467
LOC_Os05g07810	5.77625	5.45694	1.14586	0.649737	0.937454	6.58537	8.15427	1.09977	0.769619	1.06758
LOC_Os05g07820	0.120814	0.183938	0.818257	0.823909	0.926576	0.151586	0.242712	0.352933	1.80766	1.25855
LOC_Os05g07890	57.2004	55.747	6.22969	7.30325	7.10372	36.4207	65.3684	5.1753	6.70623	6.10449
LOC_Os05g08420	148.701	98.358	41.5741	45.459	52.7528	157.877	108.24	48.3254	85.5873	69.3261
LOC_Os05g08480	1.87194	1.82403	4.34117	5.68055	3.83956	2.26247	2.23459	4.73038	4.47443	5.60697
LOC_Os05g08530	1.36892	1.25074	1.26683	1.75195	1.47823	0.388111	0.321525	1.08471	2.76201	1.7271
LOC_Os05g08750	12.1555	9.80304	5.29628	5.20697	4.14236	12.491	9.54075	5.49499	5.24556	6.00491
LOC_Os05g09704	35.7255	51.3911	113.828	134.787	112.569	30.307	34.5454	100.433	132.068	100.806
LOC_Os05g09724	1.35413	2.65579	6.9505	9.98279	6.96263	0.836482	0.327765	2.61435	3.66988	2.9654
LOC_Os05g09740	112.851	137.108	250.902	299.482	278.948	77.4745	95.4927	190.324	264.692	190.189
LOC_Os05g10210	35.6488	49.7978	89.3119	138.063	92.7717	27.0599	39.3702	71.0407	88.9616	89.197
LOC_Os05g10330	3.53038	4.54315	14.2774	17.2046	21.822	2.72755	3.57164	14.2953	21.1641	14.0676
LOC_Os05g10370	3.1164	2.85083	6.26272	7.61546	8.10569	1.40443	2.21442	9.24667	10.3923	4.78948
LOC_Os05g10670	79.139	89.1904	19.3092	23.2035	23.7514	76.4054	107.167	21.1665	20.9835	20.6167
LOC_Os05g10690	44.3837	37.3332	17.4307	16.5334	15.3781	36.7913	42.8462	15.8513	14.9061	14.8561
LOC_Os05g10830	3.83253	4.07468	8.63837	10.6495	6.27314	3.4837	2.11501	7.05207	9.33153	8.08693
LOC_Os05g10840	0.577981	0.297621	0.734367	0.73326	0.794859	0.431162	0.243544	0.875216	0.688676	0.826326
LOC_Os05g11010	30.3123	30.25	37.788	48.7309	43.3411	29.3323	23.0232	47.4793	49.9508	50.1429
LOC_Os05g11130	3.45005	3.64311	1.29124	1.62225	1.30353	3.66888	3.49897	2.33692	1.8428	1.7152
LOC_Os05g11210	1.65418	2.29314	18.2165	21.4655	17.0339	3.90253	2.1797	26.4956	27.409	29.6526
LOC_Os05g11300	2.46445	2.87426	5.33262	4.81624	5.25224	1.70629	2.80537	7.77681	6.88127	6.50218
LOC_Os05g11720	5.80202	3.59379	6.65279	6.66174	5.06099	2.97499	3.28489	6.39758	6.58624	7.10227
LOC_Os05g11910	17.232	20.7821	37.3107	44.1765	44.8539	14.3709	13.7267	40.1021	50.0955	35.9154
LOC_Os05g11980	0.0315004	0.053386	0.132986	0.188426	0.204236	0.0210188	0.0442656	0.0680779	0.159933	0.0993637
LOC_Os05g11990	7.17567	9.38859	13.4463	21.2605	15.6882	7.32189	6.91966	16.8291	16.6766	15.2095
LOC_Os05g12040	2.83299	3.42211	0.236622	0.153962	0.284679	11.1944	14.3017	0.418808	1.00884	0.841249
LOC_Os05g12580	0	0	1.78e-06	0.18748	0.219998	0.189795	0.165582	6.42856	9.84504	6.58364
LOC_Os05g12630	50.1279	40.8632	6.93448	7.33135	7.94265	33.7587	38.8615	7.541	5.12953	7.2762
LOC_Os05g13900	1.62678	1.89673	4.34154	5.3102	4.98428	2.25307	2.25347	4.19389	4.83929	4.44482
LOC_Os05g13940	29.5018	33.0964	76.7464	127.957	112.993	30.7302	30.2868	90.9208	103.443	102.398
LOC_Os05g14590	0.259868	0.445085	0.701682	0.966926	1.7456	0.107652	0.185715	0.581442	1.32831	0.490551
LOC_Os05g15530	5.88809	3.48975	1.59919	1.97556	1.14886	4.09277	5.75147	1.05736	1.26136	1.49434
LOC_Os05g15770	18.193	20.9917	3.38874	3.79121	4.20282	13.8386	23.7921	3.97776	3.72642	3.83041
LOC_Os05g15850	3.28579	3.44062	10.7109	14.4669	8.39341	2.53624	2.44617	12.1603	14.9269	10.0884
LOC_Os05g16980	0.637742	0.543838	0.0745045	0.112076	0.143672	0.601376	0.695006	0.313481	0.201982	0.359521
LOC_Os05g17604	0.353631	0.249722	0.552384	0.750137	0.651122	0.328232	0.25714	0.671863	0.649546	0.58762
LOC_Os05g18470	34.1073	34.1767	14.4983	17.5374	14.9793	34.6376	45.0848	15.9827	15.3961	18.557
LOC_Os05g19030	6.07674	5.01814	8.98818	9.333	7.91858	5.31613	3.12431	9.43294	9.21368	7.41884
LOC_Os05g19670	2.1562	3.45164	6.96504	5.71548	9.21823	1.62677	2.63663	6.9751	12.8701	6.63995
LOC_Os05g19910	3.40549	2.30289	16.9394	8.93768	11.1965	2.56536	2.66103	17.0758	14.7431	10.2585
LOC_Os05g20440	1.08683	1.26867	1.1881	0.592805	0.590635	1.65955	1.40622	0.587902	0.682215	0.79693
LOC_Os05g20460	1.67546	1.39635	0.600194	0.943258	0.695973	1.60192	1.12647	0.692487	0.878563	0.378375
LOC_Os05g20560	0.348803	0.480558	0.148495	0	0.079342	0.365108	0.513572	0.183082	0.0743814	0.0780242
LOC_Os05g23440	10.9367	10.847	5.4383	4.49292	5.12298	13.6106	13.3564	4.48332	4.79529	5.21566
LOC_Os05g25040	0.961583	1.26357	0.129265	0.13275	0.405663	1.27602	1.79628	0.195976	0.2412	0.043915
LOC_Os05g25260	47.6546	39.1175	19.2416	17.2657	17.1612	44.5968	48.6827	19.5553	19.7187	21.7778
LOC_Os05g25350	4.5177	4.82154	12.6519	11.4208	12.2332	4.15172	4.19096	13.6042	12.6408	12.8034
LOC_Os05g25430	1.00209	0.895207	1.75233	1.55373	1.81711	0.832453	0.560982	1.65275	1.48137	1.41036
LOC_Os05g25540	2.99643	2.72651	5.97989	5.96973	5.21198	2.22291	2.32719	4.64763	6.1957	4.60321
LOC_Os05g25770	89.984	60.738	168.858	106.238	119.936	59.2955	41.1382	146.99	112.829	120.033
LOC_Os05g26660	3.65162	3.45138	1.82357	1.28834	1.7003	3.6683	3.37649	1.80895	2.10029	1.38476
LOC_Os05g27010	29.239	21.6822	12.5104	8.66916	11.3691	16.8557	18.0196	7.83369	8.50337	9.04378
LOC_Os05g27060	0.167684	0.116571	0.0626372	0.0677412	0.0717684	0.205391	0.119934	0.0480115	0.0788245	0.0388679
LOC_Os05g27780	219.661	182.508	32.3957	36.8275	31.3935	209.761	252.089	37.1587	34.2132	40.414
LOC_Os05g27820	9.23601	16.136	13.1649	16.9065	26.3555	7.93762	8.45781	17.398	26.4298	16.2253
LOC_Os05g28730	3.46198	4.54063	6.32432	8.13704	8.17484	3.11386	2.96449	7.20304	7.38283	6.18163
LOC_Os05g28740	1102.85	717.568	23.8502	29.5197	24.5127	1039.73	931.914	23.9694	22.9624	24.6192
LOC_Os05g28780	2.44301	2.69568	8.17764	4.98593	7.95521	1.21461	0.773447	7.43571	9.84345	4.21967
LOC_Os05g28830	6.03878	4.96919	1.95581	2.70781	2.46174	6.87952	8.22453	2.56348	3.08545	2.27774
LOC_Os05g29010	0.270812	0.297531	0.487298	0.634287	0.837677	0.199434	0.346163	0.454937	0.760391	0.393695
LOC_Os05g30010	2.84083	5.04849	7.34266	12.2215	10.1672	3.53753	3.44164	9.65464	10.7223	8.41384
LOC_Os05g30500	9.25757	9.56196	23.3885	12.3332	20.3014	6.38674	5.15512	23.0125	21.7317	24.5166
LOC_Os05g30750	2.07535	3.77195	5.56127	6.00291	8.05016	2.2246	2.9007	5.61025	8.12385	5.28686
LOC_Os05g30820	1.01692	1.43159	3.67993	4.03355	4.66874	0.611599	1.0566	3.84487	4.81271	3.45099
LOC_Os05g31020	54.9731	48.4044	3.38353	3.65479	3.97441	51.9347	61.4028	3.43587	2.7416	3.16343
LOC_Os05g31040	2.16648	2.1013	6.71027	6.02924	5.8182	2.31698	1.86539	6.59036	6.57493	6.30304
LOC_Os05g31280	2.80905	3.76513	4.47984	9.96318	4.96027	2.02376	2.27513	6.06547	6.62224	3.66731
LOC_Os05g31610	0.0474626	0.0517372	0.109983	0.137211	0.169187	0.0773469	0.0594591	0.109079	0.167178	0.186748
LOC_Os05g31670	20.9429	18.454	0.293269	0.114612	1.05376	20.694	56.3437	0.253994	0.19102	0.0930282
LOC_Os05g32230	33.2224	28.2072	54.4038	46.9432	52.5332	24.943	22.6241	54.652	49.0881	49.4418
LOC_Os05g32440	1.70618	2.0236	3.91818	3.88408	3.88197	1.41389	0.964346	3.17915	4.30928	2.72271
LOC_Os05g32474	1.57233	1.28072	0.93335	0.924134	0.651524	1.37257	1.90205	0.731227	0.86428	0.749598
LOC_Os05g32760	0.881953	1.30966	2.53892	2.89636	3.28055	0.688479	0.851396	2.31963	3.76659	2.27932
LOC_Os05g32860	7.48044	7.63779	14.7923	18.3204	29.4147	6.5411	7.90071	18.0371	18.0857	11.9425
LOC_Os05g33080	3.06855	4.87003	7.17816	9.76058	7.73925	2.76691	2.73188	8.53864	10.6966	6.46207
LOC_Os05g33130	3.7809	3.18777	0.797118	0.79463	1.58558	1.71724	2.6524	0.267351	0.219624	1.31962
LOC_Os05g33310	54.4224	49.7296	19.0549	25.6598	20.939	55.3021	58.6183	21.4645	22.0531	24.7654
LOC_Os05g33570	28.6432	26.4447	64.3573	59.2999	50.9235	30.4029	28.0526	54.3765	49.4649	43.7471
LOC_Os05g33690	4.29991	7.01971	11.3511	17.6561	16.495	4.35455	5.53252	15.1958	19.397	12.6789
LOC_Os05g33890	0.36637	0.455356	0.757232	0.894364	1.42316	0.329323	0.403959	0.622976	1.3552	0.445304
LOC_Os05g33900	24.6007	19.632	37.6513	35.8234	30.48	15.9107	13.0132	48.8056	44.8212	46.5846
LOC_Os05g34010	3.83687	3.78197	8.59079	7.58193	6.56004	3.31354	3.88517	7.28132	6.8043	8.35765
LOC_Os05g34070	278.589	316.337	150.956	154.978	153.291	290.544	353.061	158.482	165.166	151.98
LOC_Os05g34170	12.8121	14.1438	32.7021	27.8877	29.4019	11.2206	10.2785	25.4031	39.2503	20.5535
LOC_Os05g34320	1.45628	2.49246	5.03599	7.43791	7.01257	1.23015	1.40946	6.4288	7.36217	4.87537
LOC_Os05g34530	0.166487	0.382464	0.368321	2.04374	3.75401	0.676031	0.624329	1.60345	2.41601	2.87172
LOC_Os05g34830	90.5747	65.4875	26.1592	19.6067	18.7731	169.028	88.7435	31.7481	30.4696	28.1854
LOC_Os05g34854	1.77854	2.06006	5.19354	4.87781	4.24242	2.25514	2.36609	4.68099	5.41929	3.75618
LOC_Os05g35360	0.241701	0.269467	0.402432	0.443351	0.484762	0.239371	0.532657	0.49449	0.597628	0.49747
LOC_Os05g35380	0.730187	0.850144	1.43038	2.03994	2.59127	0.350567	0.377648	1.22765	2.34666	1.49226
LOC_Os05g35480	0.562517	0.896057	1.80229	2.74531	2.44796	0.677985	0.901496	1.77267	2.52213	1.49172
LOC_Os05g35910	1.48245	1.35295	2.54352	2.13615	2.03343	1.3621	1.6198	3.60933	2.43848	1.9415
LOC_Os05g35930	8.10659	7.3404	21.7264	21.0006	21.5397	4.15515	4.0898	15.6382	11.0488	14.9115
LOC_Os05g36040	0.27532	0.397461	0.0711743	0.0617594	0.0609531	0.212941	0.314932	0.0559979	0.0702296	0.0597412
LOC_Os05g36050	8.12364	12.683	12.5593	16.8086	14.0587	9.39132	11.5271	24.9979	24.4137	16.7677
LOC_Os05g36280	3.3236	6.35918	34.7949	38.8407	83.5455	1.33312	3.4005	24.1881	79.8286	14.8017
LOC_Os05g37000	0.237157	0.309546	1.69107	0.994926	1.45781	0.238585	0.734092	1.31107	1.95717	0.356782
LOC_Os05g37030	0.0691659	0.366837	0.780437	2.04502	2.27577	0.0689171	0	1.18624	2.89119	1.26339
LOC_Os05g37060	1.48491	1.94542	0.16781	0	0.164146	4.46107	3.66421	0.295958	0.174861	0.314664
LOC_Os05g37250	8.84485	7.52133	4.04768	4.43933	3.97211	9.01437	8.1285	6.73217	4.46635	5.37569
LOC_Os05g37470	4.34353	4.01793	10.5028	9.93201	8.75755	4.31915	4.3349	12.259	10.3596	10.8102
LOC_Os05g37600	3.90175	5.34395	7.45871	11.445	6.80765	3.55556	3.80356	9.04803	11.9146	8.38729
LOC_Os05g37660	7.10325	6.92389	2.77786	3.95878	3.32457	5.68269	6.56711	2.68581	3.84885	3.42743
LOC_Os05g37700	15.7455	17.2547	7.40916	7.66078	7.99793	18.1353	19.4436	6.88383	7.12978	6.73095
LOC_Os05g38000	7.58847	14.8667	24.5173	27.9955	26.8307	4.90075	8.75096	24.6293	34.4388	17.9214
LOC_Os05g38150	18.9083	21.1798	11.1168	12.5412	13.3112	22.3037	21.5276	10.833	11.8893	9.84888
LOC_Os05g38260	29.4982	23.5619	19.6352	9.802	9.75414	32.3769	29.2069	13.892	12.0487	12.246
LOC_Os05g38280	0.956426	0.783419	0.0311144	0.109319	0.0305045	1.14518	0.645592	0.0541418	0.0616494	0.0889983
LOC_Os05g38290	143.401	122.213	6.30486	6.78566	5.02459	136.264	179.791	6.66271	8.17484	8.13158
LOC_Os05g38390	0.121903	0.096851	1.50434	1.26182	1.94452	0.181462	0.13617	1.76855	1.8268	1.47109
LOC_Os05g38480	0.362088	0.63564	1.15517	1.47555	2.41559	0.375569	0.536181	1.09953	1.66401	0.708356
LOC_Os05g38500	5.12182	8.39499	11.3566	12.2671	10.7777	5.78326	6.49494	11.4797	13.9311	10.5826
LOC_Os05g38530	89.5412	122.642	44.62	47.7934	54.9057	128.571	215.763	43.078	51.5972	46.5531
LOC_Os05g38660	52.373	58.2239	17.0381	12.709	18.7387	50.1831	57.2661	13.8485	16.7239	18.6825
LOC_Os05g38860	7.38738	5.95056	1.77627	1.04352	2.62983	5.74254	7.81238	1.41397	1.45415	2.00483
LOC_Os05g39240	93.6151	69.7487	37.6937	33.9451	34.5309	73.4367	77.5217	36.1184	33.5745	38.7087
LOC_Os05g39250	156.24	130.492	7.92945	9.26972	7.83533	149.054	214.552	4.13458	6.79555	5.80238
LOC_Os05g39840	2.41642	3.19575	3.57986	4.84661	4.71804	1.47181	2.02394	4.188	4.92253	3.4126
LOC_Os05g39850	0.10746	0.294158	0.940648	1.14339	2.17849	0.0912655	0.12585	0.662275	1.26991	0.545054
LOC_Os05g39990	3.05073	2.97033	14.4249	10.8354	12.8599	2.06583	1.24489	8.80463	13.932	7.41696
LOC_Os05g40010	139.271	140.561	74.8051	58.7576	64.3146	108.503	102.324	54.0228	47.7128	62.6461
LOC_Os05g40200	2.88864	3.19632	6.8154	7.42729	8.46771	2.67366	3.63922	5.89746	9.33918	5.27245
LOC_Os05g40960	0.624506	0.700371	5.38803	5.37509	4.63722	0.706217	0.735196	4.88995	4.73808	4.53202
LOC_Os05g41390	0.111665	0.120221	1.06334	1.56445	3.56175	0.0377937	0	0.874739	2.40172	0.629342
LOC_Os05g41490	97.5968	78.2016	4.85267	2.67959	4.88719	93.6333	108.794	4.39477	4.83082	4.99475
LOC_Os05g41620	15.6388	14.3149	6.61631	6.5174	6.28964	13.5233	13.5973	6.84084	5.72489	5.86737
LOC_Os05g41670	4.8708	4.20859	7.6405	8.07026	9.41044	3.94215	3.8568	5.98763	9.08345	8.4389
LOC_Os05g41780	108.502	82.9939	43.5734	41.7533	50.7966	243.418	73.4897	45.0271	61.846	52.9701
LOC_Os05g41990	3.921	4.76003	22.2797	25.3549	26.2621	3.30596	2.78944	18.0087	30.3573	23.6533
LOC_Os05g42070	12.3925	9.61744	2.2622	2.7987	1.06041	9.50783	12.2168	2.30249	2.26102	3.37998
LOC_Os05g42120	4.55678	5.23107	12.1887	13.229	12.0199	4.74677	4.2648	12.3225	13.4083	10.5431
LOC_Os05g42180	1.77971	1.24778	3.58751	3.79159	3.90872	1.82522	1.43432	4.45625	3.19926	4.25976
LOC_Os05g42200	4.43223	3.94523	2.01864	2.15064	2.57346	5.06009	5.68616	2.30288	1.81619	2.4944
LOC_Os05g42210	7.4756	8.18421	3.74486	3.7644	3.88964	9.18808	8.25238	3.49454	3.91971	2.77349
LOC_Os05g42230	3.56518	5.50803	1.34686	2.34807	0.226718	4.83239	6.96803	4.80018	1.92411	3.96222
LOC_Os05g43110	0.444887	0.720251	0.0402624	0	0.0897338	0.35884	0.645504	0.035705	0.0418961	0.0192084
LOC_Os05g43140	0.0652822	0.288838	2.84947	4.25333	7.16027	0.133828	0.251876	2.57582	3.54571	2.38016
LOC_Os05g43390	4.47043	4.34458	2.8844	2.16125	2.22486	3.95917	4.30862	1.97927	1.71924	1.54796
LOC_Os05g43610	0.0814224	0.129862	0.268313	0.254525	0.430244	0.0516659	0.130664	0.167184	0.228421	0.219981
LOC_Os05g43820	1.37038	1.87923	5.44755	5.84031	6.92848	1.52209	1.79549	5.82574	7.03064	4.46911
LOC_Os05g43870	1.0985	1.95561	3.17434	5.35659	3.89905	0.759264	0.577027	3.18666	5.30819	4.5458
LOC_Os05g43880	0.447982	0.754781	1.0557	0.900419	0.974324	0.28604	0.10407	1.36362	1.64479	1.59506
LOC_Os05g43910	17.203	16.5423	9.1823	10.5454	8.46658	21.8857	20.6106	8.92522	10.2756	11.6325
LOC_Os05g43940	0.272079	0.801406	1.12598	2.11983	1.42553	0.897837	1.01879	2.54102	2.01374	2.99151
LOC_Os05g44030	3.47703	2.58075	0.23725	0.585139	0.481231	3.24272	2.49406	0.596792	0.368929	0.371208
LOC_Os05g44060	8.3594	7.90137	2.80502	1.54626	1.10193	23.6716	13.3372	3.44471	2.42185	1.85486
LOC_Os05g44070	8.46279	6.47692	12.0153	17.0051	16.9871	5.84295	6.71677	14.6903	16.0629	15.1897
LOC_Os05g44200	1.31467	2.2667	24.3491	30.9904	33.0262	1.42539	2.16017	22.8258	37.1683	22.4766
LOC_Os05g44210	3.71937	4.07072	7.70014	9.57398	9.89736	5.06546	4.66624	8.95773	8.34012	8.70802
LOC_Os05g44340	7.59151	9.91346	1.92744	2.21167	2.56779	8.98031	20.3688	2.10516	2.26042	1.95323
LOC_Os05g44600	0.886675	1.22995	3.66282	6.35081	4.00791	0.732894	1.03624	6.67798	5.95253	3.80516
LOC_Os05g44900	31.2046	19.1552	2.96207	2.19015	3.23537	67.9479	18.6324	3.11177	4.22436	3.09891
LOC_Os05g45090	4.67786	3.20809	2.04724	1.17266	1.70423	5.73705	5.15111	2.26969	1.42786	1.7865
LOC_Os05g45100	1.49241	1.23625	0.597472	0.3106	0.393082	1.59307	1.52868	0.532432	0.522072	0.246807
LOC_Os05g45110	0.503521	0.356252	0.244229	0.035505	0.149293	0.687661	1.58368	0.136098	0.0323269	0.198016
LOC_Os05g45140	1.88939	0.482772	0.174807	1.05257	0.185589	2.52125	4.88622	1.02083	1.57563	2.0089
LOC_Os05g45240	0.602447	0.309711	1.05957	1.01221	0.80138	0.479729	0.308498	1.19538	1.05262	1.0832
LOC_Os05g45350	33.5056	35.2104	23.9373	16.1789	15.8956	48.3994	56.1879	19.6979	18.1101	18.4443
LOC_Os05g45450	16.3981	12.8032	9.92811	5.91014	7.74274	15.0385	16.1845	5.8295	6.19346	8.23888
LOC_Os05g46040	145.994	129.955	32.7025	32.3233	31.7637	138.917	151.876	34.8442	32.1371	33.6107
LOC_Os05g46350	3.99237	3.19289	0.770365	0.795959	1.08519	6.4199	4.34113	0.6007	1.2439	0.597171
LOC_Os05g46470	5.14888	6.65042	10.2592	10.5276	9.54388	4.03281	3.84445	8.93881	8.21059	8.18435
LOC_Os05g46480	78.5547	65.8022	1.80422	1.67115	2.05573	80.0316	198.469	1.20803	0.826446	1.33403
LOC_Os05g46550	2.83265	4.27825	6.08034	8.14754	8.7938	2.97061	3.30576	6.09802	8.54322	5.98125
LOC_Os05g46750	1.96914	1.9156	0.358618	0.157485	0.199741	4.21068	2.36608	0.220138	0.211558	0.255038
LOC_Os05g46760	11.0347	6.75805	2.52161	2.44859	3.39769	33.3448	6.74228	2.77488	3.41914	2.86523
LOC_Os05g47540	10.5593	12.9229	54.2809	65.2059	59.4182	9.61462	9.09401	43.3359	43.4694	45.5492
LOC_Os05g47680	2.47117	2.18862	4.98669	6.1524	6.44287	2.00772	1.28726	4.88929	7.43211	6.31672
LOC_Os05g47700	530.634	496.208	101.065	84.9706	110.826	388.886	427.667	75.0989	71.3731	72.8761
LOC_Os05g47730	26.7258	26.0055	0.453281	0.413462	0.460818	27.9643	43.2102	0.205332	0.468907	0.107413
LOC_Os05g47960	16.163	11.7431	4.12078	0.883871	2.76514	71.8218	8.82286	2.9307	4.52767	3.73092
LOC_Os05g48140	0.294468	0.386548	0.261857	0.228465	0.255987	0.395994	0.422644	0.231134	0.219227	0.221589
LOC_Os05g48200	8.59888	9.29544	2.63517	2.84633	2.25634	16.9631	17.818	3.24811	3.2876	4.06323
LOC_Os05g48330	18.0773	11.9133	4.94722	7.07144	6.04262	13.0081	11.9481	4.87985	7.64334	4.66037
LOC_Os05g48340	13.1742	14.3615	4.65752	5.14668	5.18036	18.5085	17.1851	4.78943	4.61357	4.49754
LOC_Os05g48580	2.59897	5.21249	6.67912	6.35547	6.38638	2.60179	2.67922	4.5797	6.98405	5.44503
LOC_Os05g48650	14.2691	21.8981	2.48391	2.57564	3.10972	14.2179	27.8907	2.36492	2.83206	3.87057
LOC_Os05g48680	12.3335	8.77954	4.36826	2.08933	5.71783	5.61885	5.47295	3.0971	3.04128	4.77033
LOC_Os05g48810	26.5637	50.7495	21.2245	21.6895	26.0364	45.8319	92.5391	21.2753	25.3524	26.2148
LOC_Os05g48840	19.8381	27.4246	15.1625	11.887	9.69526	36.6981	31.9823	12.2927	12.5667	11.5151
LOC_Os05g48890	15.9801	17.2747	29.3534	23.3143	34.1722	10.119	9.57936	24.4499	33.3065	24.7675
LOC_Os05g48900	212.886	225.778	346.836	398.338	426.238	184.754	190.055	363.5	437.092	414.277
LOC_Os05g49040	0.0771749	0.372908	0.692439	0.717156	0.939758	0.0520377	0.106076	0.732366	1.12634	0.695372
LOC_Os05g49170	70.6356	76.6701	23.7757	27.0101	30.4445	63.2885	69.4137	31.4991	29.6442	30.0309
LOC_Os05g49240	4.68053	4.64256	164.821	163.803	110.299	4.37844	3.01491	168.365	136.729	134.668
LOC_Os05g49300	71.0238	65.7018	30.0616	30.3526	30.5858	67.5198	70.9078	29.9426	25.845	29.0185
LOC_Os05g49350	62.2126	56.502	19.987	23.2146	24.4904	57.7804	61.2315	27.1387	25.7327	24.9615
LOC_Os05g49420	27.4291	21.7974	8.18443	7.59406	8.50366	28.4308	27.7362	9.56545	9.43026	8.8416
LOC_Os05g49440	1.71907	1.18028	0.13609	0.159044	0.222897	0.831756	2.53479	0.0804532	0	0.0851926
LOC_Os05g49700	67.8041	57.3482	12.9582	8.64871	10.7202	73.3733	87.4709	9.61075	9.91422	11.9029
LOC_Os05g49730	35.4444	40.2873	4.03428	3.56175	2.70387	42.9288	52.3869	3.41101	2.36804	2.60293
LOC_Os05g49770	34.9276	25.4367	15.1153	13.1757	13.882	34.4644	32.9044	13.1303	12.2373	13.6768
LOC_Os05g49940	118.794	100.019	47.5585	18.5249	20.3225	182.043	185.905	19.624	26.1354	29.0847
LOC_Os05g50340	48.5405	45.8147	300.082	304.837	251.378	36.8606	44.736	362.881	262.151	285.096
LOC_Os05g50350	0.220264	0.0632138	4.5814	3.54359	2.13688	0	0	3.52849	2.72763	2.81768
LOC_Os05g50470	13.4744	10.8978	2.90467	4.28304	2.25152	11.8978	10.8028	6.91283	4.3419	3.36787
LOC_Os05g50490	9.13577	8.81243	3.2672	2.22144	2.84566	9.16627	12.6287	2.9982	3.10234	2.62816
LOC_Os05g50550	61.9628	46.6729	100.901	95.0366	88.3977	56.0013	43.8305	108.689	97.3136	107.874
LOC_Os05g50680	3.76941	5.77115	11.3086	8.17226	10.9702	5.18116	3.24076	8.53389	12.9551	7.35331
LOC_Os05g50750	2.53978	2.39708	6.3231	6.95545	6.8005	2.4679	2.46084	8.58435	7.28329	7.61393
LOC_Os05g50800	12.9601	18.3697	23.7106	31.4167	27.5916	12.7422	13.9034	24.9349	30.5977	24.006
LOC_Os05g50850	4.25645	3.45234	1.2836	1.3052	1.44677	3.72686	4.6782	0.615598	0.76856	0.975584
LOC_Os05g50910	1.14391	1.62983	3.55536	5.16223	5.09756	1.25342	1.04258	4.0316	6.19222	3.75456
LOC_Os05g50960	2.26686	4.23572	6.18708	6.84893	7.10944	2.19389	2.7992	4.97404	8.58269	4.40592
LOC_Os05g50990	3.64748	4.25636	6.32319	8.68444	7.09557	3.05265	3.60133	6.04414	8.02836	6.2697
LOC_Os05g51160	5.60521	4.96356	12.9814	12.716	12.1326	3.99024	4.69313	14.2459	13.9551	11.7116
LOC_Os05g51220	3.54035	3.207	7.22367	7.45217	5.1637	2.65239	2.23782	6.06503	12.1578	4.43803
LOC_Os05g51470	1.55865	2.04361	3.42495	2.7509	3.58683	1.45453	1.6175	3.75674	2.92892	3.56349
LOC_Os05g51630	21.0714	20.4764	9.85231	10.4475	10.1019	26.2457	25.5671	8.78329	9.27374	9.03002
LOC_Os05g51670	95.4807	84.277	36.1809	34.2406	36.8061	85.8949	99.1252	32.4096	33.6203	35.7861
LOC_Os06g01490	0.406993	0.676787	1.26679	1.50562	2.06682	0.525146	0.448027	1.40139	2.35916	1.20999
LOC_Os06g01620	2.40889	2.85992	9.08025	10.2008	7.01469	1.68686	2.1866	10.4773	9.6474	11.0359
LOC_Os06g01760	5.98968	8.98804	9.66309	12.3384	8.5102	4.92967	5.96232	12.1069	12.0007	9.10618
LOC_Os06g01934	21.2273	21.5556	37.3279	39.3933	36.0826	19.4338	18.8551	39.8985	36.8136	40.4601
LOC_Os06g01966	2.15744	2.03497	4.81637	5.51729	5.11226	1.8012	1.67036	4.95206	4.62076	5.72674
LOC_Os06g01972	0.0734936	0.272016	2.32985	1.85329	2.51894	0.195018	0.166248	3.20004	2.40821	2.14629
LOC_Os06g01990	11.5183	9.50468	16.7055	14.6823	15.5706	7.09495	7.468	16.0501	17.114	16.1907
LOC_Os06g02019	1.34549	1.08758	2.60435	3.4016	2.39991	1.41121	1.53642	2.77976	2.0786	2.65961
LOC_Os06g02040	8.63089	9.3811	0.313837	0.174503	0	4.85338	9.62177	0.138036	0.0834183	0.07383
LOC_Os06g02410	15.9122	15.5758	34.7454	30.0514	28.681	12.8217	12.7432	35.1561	28.9589	31.0234
LOC_Os06g02630	3.39248	3.15584	5.50324	5.96579	5.29863	3.12696	1.69919	6.16629	5.40205	6.99454
LOC_Os06g02760	0.731405	0.607529	0.810629	1.00885	0.738032	0.408261	0.303029	1.08351	1.31322	1.1548
LOC_Os06g02780	19.1436	24.0391	45.0762	56.3941	52.2352	14.9777	17.4811	41.4491	56.7218	48.9818
LOC_Os06g02800	4.95279	6.69804	8.37353	10.3879	10.132	4.02755	5.85717	8.16496	9.49481	10.8562
LOC_Os06g02810	6.26278	5.69368	9.69	10.0179	13.1664	4.89161	3.54951	9.06555	11.0124	11.797
LOC_Os06g02830	6.811	6.39095	11.0094	10.5832	11.4323	4.47691	4.84118	11.1302	12.1908	11.3982
LOC_Os06g02900	3.85519	4.07383	14.0759	19.5943	21.0055	4.25877	4.07691	13.6332	19.2807	17.0731
LOC_Os06g02960	3.42065	3.46905	7.55378	8.79111	6.42952	2.95158	2.88455	8.26193	7.86958	8.65023
LOC_Os06g03030	0.711426	1.92697	2.96868	4.36063	6.06014	1.44372	2.44339	2.41107	6.68228	5.03672
LOC_Os06g03040	0.605333	0.473711	1.89308	2.44534	2.93319	0.448624	0.549847	2.82902	2.24174	3.07882
LOC_Os06g03050	0.218967	0.267656	0.51851	1.09255	0.622536	0.272228	0.305885	0.534914	1.45822	0.757738
LOC_Os06g03220	2.78145	5.36811	7.9123	7.92562	9.29143	2.90861	4.632	7.08717	9.8416	6.96585
LOC_Os06g03380	0.245337	0.752331	2.33497	2.33718	3.81426	0.385552	0.697314	1.78512	3.51442	2.36463
LOC_Os06g03580	19.0373	14.2011	37.6945	29.5284	36.5466	10.9061	10.7359	27.0609	23.0469	24.753
LOC_Os06g03670	3.26386	2.99851	0.161072	0.127015	0.107098	8.59797	5.06685	0.143324	0.276148	0.153271
LOC_Os06g03710	0.100206	0.0799767	0.693292	1.26811	2.00496	0.102805	0.128492	0.545874	2.33535	0.579591
LOC_Os06g03720	1.5271	1.44961	2.94173	5.39198	6.51294	0.97983	1.06945	2.1608	5.11911	2.3323
LOC_Os06g03890	1.46489	1.25007	4.76177	4.94162	5.91485	1.18648	1.27519	7.35284	4.73197	7.2913
LOC_Os06g03930	65.3373	67.1994	34.6307	30.3578	33.3165	59.6492	63.4259	32.153	31.8144	31.0935
LOC_Os06g04080	0.729269	0.534285	1.10081	1.74716	0.873048	0.371255	0.369394	0.914751	1.48247	1.42637
LOC_Os06g04090	37.6788	29.4211	9.11134	9.45642	10.1993	35.2597	34.5757	9.30007	10.9254	8.84642
LOC_Os06g04200	1.21741	0.989797	1.98202	1.92389	1.86575	1.27392	1.30358	2.78523	2.49923	3.00206
LOC_Os06g04230	190.592	117.63	25.7999	24.3987	38.4177	395.212	121.845	26.7624	59.2732	45.578
LOC_Os06g04240	29.0911	21.5993	4.60426	1.70478	3.24612	112.474	15.6441	2.19039	3.76556	4.1779
LOC_Os06g04480	37.4051	38.7169	19.8688	14.7221	20.477	28.4414	32.2045	24.8142	14.6073	16.9211
LOC_Os06g04590	7.20351	7.24284	30.7753	33.0572	36.3047	4.05974	5.56439	33.7785	46.5783	24.6316
LOC_Os06g04699	0.335426	0.503967	1.21589	1.35683	2.48759	0.433392	0.125476	0.789048	1.60505	0.955497
LOC_Os06g04850	2.32937	2.62791	15.5836	15.9726	19.5759	1.8644	2.78462	10.0163	21.0691	11.0995
LOC_Os06g04870	3.64504	3.85109	17.7896	18.8991	25.935	4.62698	4.13578	14.1035	27.6584	17.815
LOC_Os06g04889	63.3684	49.6087	17.9885	17.2625	17.7706	46.4732	56.9663	16.3159	18.2053	13.4265
LOC_Os06g04990	1.49701	3.10649	0.307805	0.483328	1.56261	1.71014	2.78071	0.358728	0.880634	0.58846
LOC_Os06g05410	17.3742	23.7653	10.4398	6.62103	10.2996	8.11244	12.688	10.266	3.74341	8.7824
LOC_Os06g05420	6.65897	12.3251	1.03047	0.847983	1.59303	15.8897	12.1381	0.93809	1.32056	1.19856
LOC_Os06g05550	31.7471	41.0736	63.7405	68.3659	56.902	29.6856	33.1113	59.1637	86.0375	57.4824
LOC_Os06g05930	310.626	378.943	515.773	755.094	568.238	266.121	279.781	582.145	519.811	614.474
LOC_Os06g05940	16.0649	11.6219	7.0269	6.73884	4.75141	12.8698	12.395	5.4282	6.46132	6.29104
LOC_Os06g06250	34.1075	37.2156	126.359	147.327	118.857	26.4268	25.6615	129.342	147.964	103.954
LOC_Os06g06460	2.01276	2.78964	14.7549	15.8275	33.381	1.95168	1.17574	13.5245	29.6974	8.35325
LOC_Os06g06510	1.91918	2.31609	17.8813	25.9825	54.2022	1.01434	1.48646	18.0536	54.2012	12.3845
LOC_Os06g06550	2.03777	2.65702	3.15783	3.40059	4.37908	1.61551	2.44297	3.83571	5.45903	4.32423
LOC_Os06g06960	1.73745	1.8305	3.50693	3.44905	3.78268	1.39335	1.18525	3.58917	3.88369	3.76817
LOC_Os06g07030	44.3339	38.7129	5.25696	4.7023	5.17242	43.4511	51.1808	5.0786	5.21363	4.26304
LOC_Os06g07220	3.23466	2.18608	0.353815	0	0.350848	2.39288	4.54498	0.305624	0.0862142	0.251986
LOC_Os06g07300	4.2831	5.65564	14.8548	16.9867	12.8395	5.54153	5.32306	14.0984	15.1758	12.8788
LOC_Os06g07600	25.1571	20.9121	10.3929	9.73631	10.6411	25.9433	27.269	11.6422	10.5058	11.5419
LOC_Os06g07941	3.76295	2.69383	9.34916	7.33639	8.8945	2.85923	2.73152	9.25679	7.68774	8.00915
LOC_Os06g08090	5.00195	4.91643	9.53638	11.0282	10.1373	5.13028	4.39895	7.85785	11.1344	8.91196
LOC_Os06g08100	5.21854	5.36203	17.6625	21.7653	17.8917	5.8686	5.25451	11.5579	17.961	22.3674
LOC_Os06g08830	5.2327	5.70471	10.6	9.88485	7.3077	4.0119	2.93478	9.92417	10.891	11.5695
LOC_Os06g09310	4.3062	3.85135	1.98487	1.5056	2.48499	4.39523	3.3499	2.59351	3.51573	3.8873
LOC_Os06g09340	4.50614	3.70918	9.72458	13.8872	9.40987	3.17068	4.58603	12.8587	12.4532	9.92799
LOC_Os06g10210	5.48992	5.75185	3.0046	3.18987	3.4062	10.8735	5.55559	3.31626	2.98082	3.35505
LOC_Os06g10420	1.09555	0.631579	2.38057	2.46901	1.94187	1.36747	1.10644	2.02231	1.67106	1.9102
LOC_Os06g10530	30.5277	32.074	12.9126	4.57272	6.55565	46.439	47.6906	8.31451	8.90802	9.44435
LOC_Os06g11090	7.88533	7.99243	2.52119	2.63272	2.6416	9.09798	8.25839	2.07673	2.25103	1.93611
LOC_Os06g11330	12.8318	15.5387	33.0457	30.8242	33.4302	10.582	9.14722	25.8823	29.1157	20.8361
LOC_Os06g11510	0.138214	0.437865	0.574534	1.47723	1.24008	0.271471	0.264194	1.49265	2.71796	0.933702
LOC_Os06g11600	5.3722	6.29041	2.35962	2.76255	2.66983	6.80097	7.52054	2.51161	2.53893	2.33243
LOC_Os06g11610	13.5134	20.3413	7.15645	8.46666	8.63056	15.0558	27.5186	6.75788	8.14088	6.81423
LOC_Os06g11660	2.56796	1.63275	6.68612	5.26865	4.4023	2.19889	2.61542	5.0113	7.29321	7.05451
LOC_Os06g11730	0.286664	0.316315	0.784353	0.922364	1.07973	0.0596451	0.0381544	0.218605	0.657478	0.149191
LOC_Os06g11980	311.409	260.682	47.9305	47.8939	47.3966	231.931	225.98	45.9347	43.8375	41.852
LOC_Os06g12280	6.57792	8.34878	11.1949	12.306	12.1497	5.72297	5.7103	10.7652	12.9244	11.6976
LOC_Os06g12310	16.4402	17.0687	41.5612	38.9781	34.1801	12.1514	14.2359	49.246	39.9501	36.4376
LOC_Os06g12320	13.3679	9.57159	30.7691	29.8601	23.2238	15.3398	12.3575	42.8392	40.5972	39.5872
LOC_Os06g12370	2.8971	5.13011	1.72e-47	0.170494	0.143998	3.70479	5.05715	0.0957082	1.46e-102	0.102232
LOC_Os06g12460	2.532	2.19975	3.54948	3.76826	4.82757	2.36186	1.81584	3.86712	3.54038	4.77775
LOC_Os06g12740	14.2331	12.6334	23.325	21.1061	19.5404	9.11298	7.97486	17.3156	15.423	18.0274
LOC_Os06g13210	1.89906	1.94923	5.29627	4.886	5.30927	2.22475	2.47187	4.64042	4.60728	4.08823
LOC_Os06g13560	29.4683	33.8441	18.4856	12.6685	11.379	37.8998	37.5496	15.5615	14.489	12.8383
LOC_Os06g13720	22.0657	18.7102	0.800691	0.903558	0.881418	24.0265	29.3143	0.857524	0.658375	0.552089
LOC_Os06g14370	53.0214	46.0478	27.8421	28.2722	26.7574	68.3665	56.5715	27.1435	29.045	27.7678
LOC_Os06g14630	1.85767	2.02771	6.63865	6.24325	6.47822	1.39077	1.30792	4.69961	8.4529	4.29832
LOC_Os06g14670	34.3394	25.1123	1.86995	1.80868	2.08628	29.222	30.4884	2.57595	2.42778	2.3408
LOC_Os06g14810	3.60935	5.83678	13.3892	19.1774	16.2635	2.83984	4.21556	12.4603	22.7948	13.421
LOC_Os06g15370	7.37226	5.57901	3.3942	4.52299	3.27485	7.69222	8.87571	3.3691	2.9574	4.12056
LOC_Os06g15610	9.64976	14.4802	22.132	25.4822	37.8946	9.76577	10.564	22.6245	39.1817	20.2168
LOC_Os06g15730	5.12745	4.90456	8.14202	8.70228	7.91493	0.867328	0.645492	1.49122	2.03465	1.48571
LOC_Os06g16300	13.1421	14.4907	32.3383	34.6344	31.9353	11.1475	10.1518	33.5212	32.6349	32.7318
LOC_Os06g16630	3.35639	3.82351	1.72355	1.11441	1.02871	3.72587	4.38688	0.968817	2.43326	1.55253
LOC_Os06g16640	7.99855	6.87248	26.0244	26.8263	21.7452	4.16415	4.0582	13.0854	17.1174	12.6686
LOC_Os06g17070	0.978039	0.298317	0.374025	0.198803	0.345685	0.704651	0.487644	0.163436	0.067549	0.218213
LOC_Os06g17490	0.256168	0.0897989	0.973335	1.32196	2.07284	0.0559383	0.0365183	0.231762	1.60532	0.799368
LOC_Os06g17560	1.73222	1.15188	5.91624	3.8554	5.95369	0.458958	0.785321	7.8566	3.99607	5.33731
LOC_Os06g17570	0.862186	0.410811	1.88867	2.4696	2.29532	0.847006	0.640506	1.99738	2.14197	1.80299
LOC_Os06g18930	2.17586	1.93827	7.49753	6.27832	4.98602	1.66601	1.95111	6.75946	5.22617	5.46155
LOC_Os06g18960	1.12547	0.934364	2.63287	1.75111	2.38071	1.21355	0.881229	2.41525	2.53164	2.16071
LOC_Os06g19200	15.1431	14.4935	3.6429	6.36594	4.17493	14.0893	10.8403	3.1115	8.00534	5.31848
LOC_Os06g19530	3.4636	4.92639	4.93744	7.87574	4.75419	2.36479	3.40653	5.12438	5.62072	6.54292
LOC_Os06g19550	0.733174	1.05695	2.44638	2.49616	5.34118	0.244401	0.387174	1.66186	4.38513	1.85178
LOC_Os06g19630	0.666827	0.379639	0.0105427	0.0367524	0.00874086	0.505754	0.709724	0.0285205	0.0236502	0.0622801
LOC_Os06g20040	15.3048	17.266	24.1529	21.7771	19.1443	11.2824	12.5383	22.2389	26.796	21.0586
LOC_Os06g20150	0.438736	0.789599	3.98129	3.10437	2.4855	0.18433	0.323778	3.16079	2.83684	4.5173
LOC_Os06g20310	0.600484	0.797807	0.132889	0.178669	0.252944	0.552342	0.678243	0.309554	0.349895	0.158394
LOC_Os06g20790	0.858761	0.507002	1.28031	0.918318	1.40361	0.726716	0.667073	1.2432	0.977379	1.28179
LOC_Os06g20900	2.02826	1.35871	2.86194	2.43838	3.14722	1.92341	1.28044	3.44087	3.3191	3.19645
LOC_Os06g21230	471.791	518.709	744.19	979.672	721.129	353.125	363.598	588.089	759.177	625.703
LOC_Os06g21250	7.04268	9.22987	31.0749	44.8568	26.2513	5.91982	7.26281	28.2797	34.3874	28.0768
LOC_Os06g21570	1.14777	1.17335	2.17061	2.53642	1.9859	0.841016	0.616662	1.51814	1.62346	1.69459
LOC_Os06g21910	6.12908	2.92141	0.167291	0	0	5.23113	5.326	0	0	0.0781707
LOC_Os06g22050	0.532674	0.88497	3.0359	2.1166	3.18089	0.170081	0.719206	2.42335	3.64091	2.22041
LOC_Os06g22060	41.6994	43.2987	12.311	14.279	12.2836	45.5813	47.9535	11.6164	11.8423	12.216
LOC_Os06g22870	152.156	180.399	239.606	278.856	255.175	141.132	141.858	282.993	281.432	248.006
LOC_Os06g23114	2.42722	2.52116	4.78751	5.18799	4.82185	2.74106	3.04841	4.88461	4.90951	4.9358
LOC_Os06g23360	1.59934	1.25437	0.375362	0.892877	1.50003	1.16923	1.10683	1.04942	0.716985	1.10501
LOC_Os06g23684	8.19981	9.49122	2.28749	2.82783	2.88643	7.90193	7.36047	2.29386	2.73385	2.44381
LOC_Os06g24180	3.28966	2.4107	1.89039	1.10692	1.25471	1.90352	2.7184	0.840707	0.569718	0.776212
LOC_Os06g24190	85.5777	69.0361	29.5532	22.2579	23.9596	61.1256	82.1845	27.5541	29.8888	32.1637
LOC_Os06g24490	5.75834	5.31627	3.09861	3.22541	2.59248	4.6544	7.15445	2.95403	2.66768	1.9963
LOC_Os06g24730	120.545	115.777	64.8099	52.6329	50.8069	160.64	148.543	64.0807	61.8661	60.8706
LOC_Os06g24990	40.0648	28.7725	8.5043	8.81505	6.73464	34.5127	33.4037	6.45727	8.98379	5.47387
LOC_Os06g25010	44.2673	37.4979	8.24412	7.23763	9.37763	46.7403	39.3847	6.7373	5.5668	6.43714
LOC_Os06g25950	1.57166	2.009	3.45606	4.40254	4.68064	1.74468	1.15659	4.22829	4.62642	3.85448
LOC_Os06g27910	6.23149	7.09184	0.766726	0.856051	0.295814	6.75378	9.15613	0.647162	0.621457	0.633898
LOC_Os06g28000	0.73582	1.19751	3.55772	4.73639	4.92882	0.511687	0.552452	3.50594	5.22563	2.78876
LOC_Os06g28480	3.89523	6.29663	6.82606	10.7414	7.81387	3.77443	5.2918	8.51385	10.3667	7.935
LOC_Os06g28630	11.9961	11.4396	24.5867	17.724	20.3556	6.65952	7.63235	16.298	17.5038	15.8203
LOC_Os06g28670	3.16142	2.46524	1.40764	1.63994	0.625932	2.0667	2.54899	1.2642	1.35919	1.0626
LOC_Os06g29180	107.471	111.66	53.1348	57.2236	53.4036	106.235	125.424	49.7306	54.2286	53.1709
LOC_Os06g29730	33.3822	17.9718	100.616	48.1573	71.2449	4.71651	4.29952	50.0399	22.1922	35.2584
LOC_Os06g29790	2.44393	1.8452	0.936707	0.968118	0.787245	1.75665	1.50942	1.34607	0.866103	1.10146
LOC_Os06g30179	2.67964	2.5343	0.943838	0.841714	0.9368	2.10798	2.8386	0.929979	1.24206	0.916921
LOC_Os06g30210	1.86494	5.47451	5.73141	8.43601	7.60196	2.57879	3.06514	8.41023	10.978	5.14779
LOC_Os06g30370	119.134	83.9205	3.32016	5.27859	2.82117	127.932	121.06	4.54503	3.70848	4.22482
LOC_Os06g32600	203.121	237.88	44.8896	41.3304	38.1405	44.6459	74.7183	17.366	24.8877	13.3968
LOC_Os06g32650	8.7778	11.3943	6.71359	6.88465	7.31426	8.01134	9.758	7.43159	8.30931	8.05695
LOC_Os06g33170	4.36637	6.24161	7.90128	7.68539	8.39597	5.86193	3.957	9.69133	9.46997	9.82142
LOC_Os06g33970	4.97541	5.51024	1.82742	1.1945	2.00373	8.59666	1.87617	2.15135	2.4606	3.91521
LOC_Os06g34120	57.2345	75.4046	110.728	152.706	118.41	63.7549	77.4218	131.476	154.781	137.123
LOC_Os06g34730	9.52453	8.95099	14.3397	16.7324	12.759	7.74487	5.37944	16.2994	14.5124	17.0605
LOC_Os06g35200	1.91372	2.45098	4.03968	4.73847	3.47101	2.13015	1.66132	4.47278	4.22332	4.02868
LOC_Os06g35960	31.4382	25.1725	3.21633	3.46447	2.75616	29.922	31.0791	2.27034	3.26391	2.71259
LOC_Os06g35970	80.778	112.552	207.929	188.802	160.99	66.0085	72.3717	172.127	205.955	124.029
LOC_Os06g36040	9.7745	10.3748	20.379	20.1513	22.79	16.5435	14.8498	30.6993	21.8491	27.0194
LOC_Os06g36050	5.88718	7.36038	13.2754	17.2169	16.1923	5.18856	6.09711	12.5508	17.1278	14.21
LOC_Os06g36390	2.03925	1.18018	0.620395	1.09897	0.642191	1.87468	2.51212	1.07486	0.819415	0.743432
LOC_Os06g36450	1.18016	1.00453	1.98937	2.54278	2.11603	0.886179	0.946764	2.22122	2.00838	1.93614
LOC_Os06g36560	8.87616	7.5425	15.2697	14.3678	13.5855	6.82276	4.73887	14.2507	14.1773	11.8064
LOC_Os06g36670	1.1296	0.594768	3.33305	2.44768	3.81506	1.22559	1.38575	3.22271	2.27953	3.04702
LOC_Os06g36810	11.3517	11.5824	37.8619	37.3148	29.6444	5.35583	12.0239	23.2954	26.1891	27.0028
LOC_Os06g37080	9.15894	8.55212	16.4093	12.3583	17.7165	5.36204	3.27008	8.19611	11.927	8.03108
LOC_Os06g37150	3.20279	3.88138	1.52811	1.61672	1.3482	3.01812	3.80261	1.40482	1.75351	1.90118
LOC_Os06g38120	0.868984	0.852413	1.46902	1.06111	2.01538	3.61139	2.20199	8.6654	5.46952	5.50024
LOC_Os06g38950	0.32305	0.375263	0.457013	0.536035	0.567546	0.162502	0.312407	0.514985	0.597265	0.44441
LOC_Os06g38970	4.1503	5.11152	8.65761	9.66234	9.26165	3.98007	4.12155	9.38889	10.5996	9.37692
LOC_Os06g38980	1.36803	1.63366	2.80778	2.74736	2.68717	1.1343	1.13503	3.40401	3.76528	2.92739
LOC_Os06g39110	43.5843	40.9772	106.208	67.2995	102.615	10.9181	10.2128	52.779	33.576	39.8771
LOC_Os06g39120	34.7081	39.9005	90.4525	68.0471	100.572	10.4721	11.793	69.9239	46.1945	60.7867
LOC_Os06g39230	3.779	4.71432	10.0356	11.7736	11.7506	5.17645	4.09814	11.6054	15.1456	13.1791
LOC_Os06g39480	4.16636	5.16357	1.2271	1.52136	1.36029	5.886	6.10761	1.44235	1.52435	1.28034
LOC_Os06g39650	2.32124	2.22806	1.32588	1.06184	1.35592	2.1084	3.0688	1.25349	1.14304	1.04305
LOC_Os06g39712	1.73673	0.870129	2.37439	2.51918	1.97692	0.989538	0.851432	2.69229	2.49487	2.11439
LOC_Os06g39750	21.3488	30.2655	46.9124	64.177	52.6041	26.0219	31.5093	50.4158	63.7576	46.5154
LOC_Os06g39780	1.02465	1.54212	3.83033	2.33371	4.60516	1.31947	1.00271	3.17337	2.99531	3.83239
LOC_Os06g39875	9.7816	7.20927	3.69298	5.09989	3.66013	9.40696	8.73703	3.52991	3.20482	4.29968
LOC_Os06g39880	4.69655	3.04409	14.1661	9.98638	8.66989	2.7368	3.81361	14.6206	11.8968	11.0831
LOC_Os06g39960	2.84471	2.18352	4.57737	3.35088	3.66173	2.07565	1.88324	3.98932	4.1887	4.28475
LOC_Os06g40080	125.678	121.809	87.7133	65.8074	60.462	161.533	172.088	83.7333	77.3306	74.333
LOC_Os06g40120	43.0062	46.4897	19.255	18.9691	22.3783	41.4683	47.7776	21.4949	20.6335	21.256
LOC_Os06g40150	7.94713	15.0929	20.881	31.5559	26.6989	7.26386	10.6917	24.0753	30.8508	21.078
LOC_Os06g40170	1.5525	1.00022	2.76856	2.71468	2.76819	0.886252	0.665688	3.05581	3.25703	1.81458
LOC_Os06g40180	3.27488	2.59602	5.93652	6.26543	5.02102	2.07614	1.6254	5.12455	4.36712	5.29332
LOC_Os06g40210	110.399	103.926	52.5942	35.0055	35.4446	94.1474	139.064	40.7891	41.2734	44.9578
LOC_Os06g40500	16.5128	21.5598	39.2507	39.3049	36.3114	17.1366	20.4078	38.9594	53.1728	35.9898
LOC_Os06g40809	8.24583	6.90273	4.05032	3.37332	1.50925	5.35888	8.81416	3.91998	4.02394	6.68951
LOC_Os06g40818	3.58092	2.37974	5.16523	7.78227	3.37566	2.93743	1.69565	4.04941	5.20011	4.8806
LOC_Os06g41060	5.13593	5.93282	8.55692	11.3541	13.0573	4.45718	5.56983	8.46415	13.3336	7.90729
LOC_Os06g41090	0.916469	0.000371822	0.000436491	1.22611	0.0951403	0.000558723	0.202017	0.553764	1.20388	0.926973
LOC_Os06g41700	1.45418	2.36839	4.37767	5.64199	6.03479	1.14319	1.79184	5.15114	5.69712	3.85149
LOC_Os06g41910	6.53366	9.38953	11.4737	18.5245	10.5682	6.40947	7.64469	13.757	16.5131	14.8887
LOC_Os06g43020	6.10233	4.96285	1.73583	1.80056	1.4973	6.59196	6.36275	1.70621	1.41207	1.20075
LOC_Os06g43044	1.78089	2.56856	10.2512	16.3135	10.8066	1.85711	1.99875	9.78213	14.0268	13.5241
LOC_Os06g43170	5.07498	9.0673	7.83673	11.6742	9.72484	3.83381	5.15796	11.7879	13.0939	8.66847
LOC_Os06g43350	9.6685	9.17899	14.119	11.1676	12.5024	7.89222	6.72666	16.5715	21.8501	18.2263
LOC_Os06g43600	3.40505	3.64718	13.3994	10.9691	18.1653	1.86759	1.96338	12.1805	21.3354	7.76713
LOC_Os06g43770	0.283453	1.30066	1.31857	1.98564	4.1677	0.401964	0.339244	1.83835	3.50015	2.38035
LOC_Os06g43860	146.752	150.199	330.582	323.126	302.241	154.809	162.038	342.194	331.369	352.915
LOC_Os06g43870	67.1042	59.9768	31.5973	36.4416	31.5795	87.3556	73.8526	37.2237	37.5931	37.7253
LOC_Os06g44160	36.8865	30.4726	16.7546	17.3102	16.0693	82.1013	41.2342	15.9308	10.346	16.7184
LOC_Os06g44190	638.39	517.613	60.5047	81.5156	62.2406	684.103	538.811	59.3321	108.798	121.914
LOC_Os06g44260	27.0266	25.9076	4.04856	5.02059	5.94201	34.1155	38.0495	6.96571	6.49502	4.81545
LOC_Os06g44300	0.419191	0.90262	1.72167	2.03357	1.80438	0.687238	0.302799	1.15466	1.79944	2.30281
LOC_Os06g44310	6.80886	10.5413	13.2	15.8954	18.3622	4.74597	6.90281	14.7818	19.4752	10.7608
LOC_Os06g44320	0.801578	1.23581	2.05508	2.79419	2.54098	0.626825	0.614316	1.69637	2.17172	1.81377
LOC_Os06g44810	0.113775	0.290675	0.408752	0.524695	0.563272	0.150241	0.207381	0.318352	0.473277	0.241861
LOC_Os06g44930	4.80007	6.02346	8.03162	9.9657	11.5114	2.10165	3.08926	9.53047	10.9086	5.64848
LOC_Os06g45184	2.30974	2.04299	0.704658	0.660268	0.996025	1.59685	1.74334	0.648873	0.894653	0.946099
LOC_Os06g45580	1.579	1.98464	5.59139	4.44313	5.08394	2.06075	1.08134	3.5619	5.38511	5.97003
LOC_Os06g45690	0.364157	0.516084	0.788155	0.729236	0.861694	0.445177	0.317721	0.607277	0.941194	0.793871
LOC_Os06g45710	98.1936	114.471	28.0223	29.7172	29.1459	105.275	129.943	24.6257	22.3389	18.0108
LOC_Os06g45990	0.859105	0.632119	4.21057	4.9174	8.80418	1.21476	0.818955	3.363	5.90475	4.09712
LOC_Os06g46340	1.41255	1.32604	2.14134	1.61816	2.53021	1.02137	0.894172	1.72384	2.77155	1.8795
LOC_Os06g46350	5.18807	8.6785	12.5382	13.0453	12.9152	4.18348	6.10774	11.8752	18.6405	8.34894
LOC_Os06g46500	0.769059	1.25587	6.21797	6.90038	9.35165	0.979779	0.837534	4.67422	8.01439	4.04304
LOC_Os06g46680	12.0313	16.0905	26.5966	36.5654	31.7847	9.13155	10.1257	26.4089	41.4009	25.4611
LOC_Os06g46740	43.0886	37.1764	2.92394	3.7115	4.42802	29.1862	62.331	2.16015	2.07466	2.23128
LOC_Os06g46799	89.2716	86.5086	126.472	139.862	122.333	64.2541	63.6853	122.189	124.347	130.497
LOC_Os06g46900	22.5418	32.5582	11.5319	14.3651	15.0176	32.0099	46.33	12.7765	12.9055	11.8802
LOC_Os06g46920	18.6576	14.8755	1.71281	2.44318	2.37767	22.5418	23.8592	2.28095	2.31231	2.48001
LOC_Os06g46950	80.1713	59.1415	28.5573	20.4023	35.4334	269.582	39.0206	28.3668	45.2322	40.4312
LOC_Os06g46990	0.350941	0.296016	1.33628	2.45977	3.25692	0.202238	0.150059	1.09664	3.05599	0.960497
LOC_Os06g46995	1.82098	2.41773	3.41704	4.6569	4.18	2.08769	2.40388	4.07551	5.28404	3.00989
LOC_Os06g47130	3.09451	3.48382	1.58447	1.86225	1.94416	3.95149	5.21516	1.63303	1.72764	1.86375
LOC_Os06g47250	0.344144	0.414113	0.585712	0.755856	0.735308	0.280682	0.341049	0.635549	0.755439	0.531654
LOC_Os06g47600	6.31991	10.8621	20.6139	23.2779	27.8304	5.99337	10.5172	17.3186	31.724	16.3508
LOC_Os06g47770	1.15986	1.7211	2.75441	3.76937	3.8769	1.23764	1.07866	2.57256	4.59767	2.68725
LOC_Os06g48030	1.34768	2.68071	14.7777	20.7668	19.475	1.63275	1.18528	16.7332	20.3429	13.0305
LOC_Os06g48160	6.45538	12.6419	51.2423	70.681	79.9621	6.38999	9.49477	51.5435	88.2234	49.0502
LOC_Os06g48180	6.34474	5.60026	15.8487	13.2531	13.6294	4.61462	4.85223	12.8552	10.0642	15.2206
LOC_Os06g48210	3.895	3.97011	1.37478	1.37995	1.20504	3.50178	5.04358	1.43902	1.56465	1.73164
LOC_Os06g48300	56.4771	52.599	6.95891	7.39265	7.07908	52.5821	58.2575	5.92685	5.87127	5.99723
LOC_Os06g48500	10.1194	5.45993	1.39989	2.2881	1.51632	8.24254	8.16783	1.75127	1.73191	1.77071
LOC_Os06g48560	5.51778	5.71902	13.3025	14.2106	12.8073	5.55853	6.29208	16.6778	14.4154	14.289
LOC_Os06g49100	2.5834	4.04577	7.54104	10.7044	12.0333	2.06327	2.65221	8.31393	12.4454	5.84071
LOC_Os06g49220	7.51341	6.75109	15.6081	17.9255	14.6912	6.3324	5.3648	16.7041	15.6384	16.5564
LOC_Os06g49640	226.384	209.717	66.8076	62.1742	65.0404	245.823	237.072	74.0262	66.1189	70.0829
LOC_Os06g49660	19.5228	17.3598	6.42523	8.8732	5.21624	15.3744	18.6086	7.91154	6.2025	7.20117
LOC_Os06g50230	58.3465	32.1677	13.0031	13.4263	12.7092	47.5954	45.6814	17.2078	15.1446	16.9889
LOC_Os06g50400	2.46206	3.32859	0.679906	0.292598	0.583757	2.3892	1.05849	0	0	0.158241
LOC_Os06g50900	0.953285	1.4602	3.01373	2.59624	4.40538	0.359349	0.728953	3.10196	4.08926	2.10955
LOC_Os06g50950	4.21067	5.04058	11.3303	8.34573	7.84026	3.61682	4.10276	20.7264	14.72	7.36547
LOC_Os06g51110	0.0411285	0.063708	0.494682	0.81181	1.67765	0.0118313	0.0142507	0.341121	1.00247	0.392116
LOC_Os06g51260	25.041	32.9139	14.047	14.5588	12.5551	29.5482	50.3267	17.8076	17.6012	17.0423
LOC_Os06g51320	0.411316	0.664775	2.94387	2.65599	3.49105	0.543025	0.630131	2.03428	4.3035	1.72834
LOC_Os06g51440	12.783	6.24044	2.97e-07	3.08e-06	0.0461564	10.0548	10.4969	8.89e-09	1.71e-08	3.06e-06
LOC_Os07g01070	0.32903	0.347085	0.82997	0.957223	0.722053	0.530026	0.382363	1.87961	1.87945	1.47381
LOC_Os07g01110	1.03612	1.02193	3.84178	5.15847	4.10009	0.678222	1.08559	4.41048	6.64817	4.48289
LOC_Os07g01180	0.801008	0.592577	2.11509	1.59934	1.56764	0.42621	0.443559	1.8378	2.6988	1.82027
LOC_Os07g01340	0.94867	1.46169	0.561846	0.196117	0.152862	0.915072	1.23169	0.397918	0.219958	0.305757
LOC_Os07g01530	1.55981	2.47783	5.14097	5.51429	6.46402	0.974099	1.71238	4.64473	6.92338	6.101
LOC_Os07g01860	2.30616	3.20953	5.2333	6.78711	6.21392	2.32411	2.02578	5.2759	6.72503	4.2645
LOC_Os07g02100	6.40957	5.85227	13.1011	12.5335	12.208	5.19119	4.6198	12.6319	12.1023	13.066
LOC_Os07g02120	5.47855	3.92961	9.71673	9.03733	9.51429	7.09109	5.22015	14.1309	12.2625	12.6949
LOC_Os07g02140	1.33382	2.07899	5.01041	6.59836	3.80615	2.02835	2.60392	6.50501	6.54275	10.6226
LOC_Os07g02150	1.29075	0.831138	1.78966	2.30213	1.4326	1.00268	1.00104	3.76256	3.47311	3.46357
LOC_Os07g02200	25.7313	28.2758	49.393	58.1692	68.2904	19.9292	20.465	42.8073	74.5133	50.7373
LOC_Os07g02440	0.424057	0.314494	1.5893	2.27859	1.58789	0.425648	0.571369	1.55312	2.15938	1.75611
LOC_Os07g02540	10.3592	9.83141	18.7941	19.9528	15.9713	10.4998	10.6962	21.2082	20.2394	25.9917
LOC_Os07g02780	0.265537	0.405749	0.867518	0.745853	0.838693	0.388907	0.255681	0.808186	0.991789	0.850008
LOC_Os07g02810	1.10303	1.79896	9.0104	13.4085	11.9871	0.751894	0.88642	8.51871	14.3832	8.08562
LOC_Os07g02850	2.28816	2.06857	0.395728	0.782144	0.517701	1.8964	1.56369	0.352856	0.370795	0.290291
LOC_Os07g03120	1.86422	3.88159	6.76399	7.14183	11.1296	2.49746	4.43898	6.83143	8.92204	5.32514
LOC_Os07g03150	0.807534	0.941569	1.63217	1.4144	1.64179	0.655475	0.704518	1.55743	2.10933	1.03014
LOC_Os07g03170	2.37325	1.97037	5.82422	4.68439	5.2804	2.1208	1.93974	7.47928	5.57439	5.96329
LOC_Os07g03870	2.5233	1.90046	5.00458	3.60696	4.69119	1.75545	1.42964	5.03427	4.236	3.81774
LOC_Os07g04040	1.2707	1.32584	0.496484	0.524231	0.583086	1.31844	1.00726	0.50897	0.477894	0.396448
LOC_Os07g04150	4.61332	6.21062	12.2031	15.3133	15.9975	3.64111	4.06975	16.0628	21.1963	15.708
LOC_Os07g04180	37.783	38.5008	79.3563	72.832	72.3328	31.848	30.0604	75.415	69.1828	66.0132
LOC_Os07g04190	3.62325	4.35889	6.11124	8.14533	7.15645	3.38204	3.49471	6.31907	7.92488	6.84835
LOC_Os07g04730	1.1517	1.50977	2.00008	1.94305	1.89697	1.27497	0.824989	2.45207	2.1367	1.90572
LOC_Os07g04930	11.5381	13.921	18.0907	20.8254	22.0491	11.3233	9.50956	16.4097	25.197	19.7203
LOC_Os07g04950	3.87355	4.76942	16.8323	13.1496	17.8286	3.29888	2.78879	7.12312	16.2233	11.2484
LOC_Os07g04960	2.4994	4.51973	11.25	9.74639	8.63771	2.41489	1.30394	9.77937	13.0537	9.84485
LOC_Os07g05024	0.143244	0.23707	0.459821	0.607585	0.658592	0.0934847	0.229283	0.574114	1.05268	0.346384
LOC_Os07g05110	2.35486	3.09425	4.19189	6.27038	7.07575	1.88662	1.95149	4.70742	9.56494	5.57328
LOC_Os07g05190	0.392	0.770226	2.57011	2.70739	3.96665	0.214892	0.398795	2.0804	4.32515	1.6079
LOC_Os07g05365	3.44557	3.41552	0.647486	0.491877	0.661526	3.39615	4.5184	0.276715	0.32	0.285392
LOC_Os07g05460	1.65053	2.09077	4.70099	5.88406	4.05522	0.663317	0.522533	3.02314	4.9287	3.05378
LOC_Os07g05740	0.725099	0.709438	1.56281	1.92205	1.78906	0.748445	0.632723	1.30948	1.82652	1.49459
LOC_Os07g05940	23.132	6.96855	0.788084	0.485239	0.327155	25.943	15.9097	0.577053	0.612481	0.347484
LOC_Os07g06460	7.1609	7.28344	3.31567	2.90303	1.88954	5.36656	4.76077	3.47986	3.23129	2.36631
LOC_Os07g06470	8.01533	7.67712	15.72	12.3243	11.4327	5.53173	5.68078	13.1923	16.2376	11.9694
LOC_Os07g06570	1.78321	1.81332	2.95382	3.32043	3.17624	1.0655	1.26827	3.25979	4.06502	2.77246
LOC_Os07g06620	3.93513	4.91136	7.96529	7.70967	8.65523	2.98163	2.66722	6.08127	7.64298	6.30795
LOC_Os07g06860	2.66661	0.753759	14.3237	11.7883	9.48435	1.77874	1.33537	10.7468	13.1608	11.153
LOC_Os07g07040	24.4498	23.3224	7.94039	9.72161	9.86576	30.702	23.0325	7.26619	9.3487	6.69752
LOC_Os07g07230	8.40057	11.6643	15.3229	20.5081	18.3945	8.24192	8.69731	18.324	18.6131	16.8384
LOC_Os07g07410	49.2417	37.8995	13.7154	14.5492	14.8547	48.2769	49.479	13.4919	11.5512	13.5376
LOC_Os07g07860	5.17917	3.47841	0.945253	1.39106	0.78614	2.61326	3.18031	1.51416	1.07058	2.41558
LOC_Os07g07900	1.16398	0.934544	1.78339	1.97739	2.28966	1.5114	0.876063	2.77972	3.32778	2.22562
LOC_Os07g07990	10.7245	12.3073	26.5887	29.1558	24.9351	11.0135	7.82119	27.6562	37.1753	26.1882
LOC_Os07g08320	1.36082	1.39861	0.312267	0.38306	0.417306	1.37129	1.90884	0.344335	0.378572	0.19257
LOC_Os07g08350	0.490441	0.227765	2.19106	1.16233	2.00873	0.243186	0.157873	1.96285	1.28579	1.87579
LOC_Os07g08360	4.88876	4.12422	1.51111	1.66503	2.04264	2.56202	3.5039	1.6686	2.26674	2.14991
LOC_Os07g08390	39.7441	36.6016	14.201	15.515	14.7427	34.4768	39.6711	15.4019	16.7225	16.5067
LOC_Os07g08710	77.1442	77.0768	168.115	170.142	180.891	62.3773	55.2281	157.022	170.765	146.847
LOC_Os07g09050	2.33007	1.38505	0.429746	0.949461	0.801146	2.40226	2.23525	0.548037	0.705845	0.90246
LOC_Os07g09190	2.54811	1.54654	4.06466	3.24809	3.98686	1.8867	1.98537	4.31973	4.80225	4.07585
LOC_Os07g09420	10.666	9.44181	4.36639	4.97478	3.85287	8.53156	8.74101	3.39545	2.71106	5.55189
LOC_Os07g09670	4.53172	4.92851	2.17894	2.81607	2.9842	6.45262	6.3881	2.22985	2.64656	3.07591
LOC_Os07g10530	3.69466	5.46838	12.2648	14.797	18.8783	2.77324	3.19218	10.332	17.3551	11.1163
LOC_Os07g10840	331.379	313.805	14.9501	14.9584	13.7344	418.986	626.496	16.9352	20.2508	20.3612
LOC_Os07g10910	0.185225	0.287892	0.517095	0.585052	0.544516	0.110466	0.120396	0.419435	0.438789	0.614534
LOC_Os07g12100	0.134052	0.363447	2.56831	2.64542	3.63193	0.226319	0.120775	1.79813	3.40656	1.92199
LOC_Os07g12390	39.936	37.6833	15.0523	16.4548	15.4773	23.3171	24.677	12.4702	11.8112	13.9559
LOC_Os07g13634	2.65218	3.35733	6.08151	6.50056	5.30502	2.00619	2.40476	4.71145	4.98013	5.57123
LOC_Os07g13834	37.8365	38.0227	17.8051	17.6219	16.3342	34.0402	47.6429	19.8229	17.9873	16.8387
LOC_Os07g14600	31.326	24.5117	4.4529	5.23988	4.68429	26.0143	35.5686	4.12544	5.00225	5.95829
LOC_Os07g14740	4.73271	2.46184	11.4408	7.65985	10.2992	0.995531	0.510852	4.27554	3.974	2.50782
LOC_Os07g14850	15.4752	18.0095	31.7847	36.9159	36.3364	19.0672	18.3942	36.0812	43.6102	35.8134
LOC_Os07g15370	0.586331	0.527121	6.23614	6.05531	6.96168	0.27209	0.336959	3.97152	8.10359	5.04365
LOC_Os07g15959	45.9328	49.1601	6.56604	5.69127	7.166	48.538	57.6261	3.18613	5.64875	4.00154
LOC_Os07g16970	5.31167	5.16329	2.47869	2.3096	2.49412	3.77619	4.12172	1.87415	1.8663	1.81737
LOC_Os07g17970	2.86458	2.9226	6.32886	7.7788	6.97496	3.61818	3.6083	7.73255	9.97223	8.10473
LOC_Os07g18230	3.44293	3.30852	8.46125	5.70178	7.37938	1.97997	2.03352	7.17775	7.78015	6.24916
LOC_Os07g18240	7.26054	6.87723	11.6731	11.2646	11.4696	3.30366	4.00412	9.20093	8.54945	8.08409
LOC_Os07g18750	1.80402	1.26014	6.59338	12.8027	7.65874	1.27874	1.24243	6.93706	5.9051	5.84737
LOC_Os07g18990	20.9397	19.1351	47.5971	51.5188	59.5437	12.08	12.6944	47.677	30.463	47.4645
LOC_Os07g19140	0.170691	0.224987	0.435542	0.464311	0.467778	0.190576	0.18003	0.324904	0.320843	0.387582
LOC_Os07g22580	0.0141895	0.032661	0.458927	0.897771	1.93764	0.0304748	0	0.282874	1.5204	0.390006
LOC_Os07g22930	34.3423	48.2509	67.0488	69.5266	83.3619	36.5177	29.1427	73.3578	69.5895	69.4459
LOC_Os07g23120	376.541	360.149	150.991	140.914	128.329	160.641	207.252	100.1	122.643	90.4276
LOC_Os07g23570	0.961049	1.51697	0.244796	0.370687	0.311089	2.68759	1.13274	0.404329	0.348915	0.287049
LOC_Os07g23660	5.94726	10.6907	3.03529	4.79704	4.29813	8.62378	12.8962	3.53841	5.3581	3.17807
LOC_Os07g25810	4.62749	6.48886	15.3651	17.2424	19.8014	2.793	3.51596	16.1607	24.406	11.8332
[truncated: 1,094 more rows]
