# Supplementary material for: OsJAZ1 Attenuates Drought Resistance by Regulating JA and ABA Signaling in Rice
Source: Front Plant Sci. 2017 Dec 11;8:2108. doi: 10.3389/fpls.2017.02108 (PMC5733117; doi:10.3389/fpls.2017.02108)
Supplement: Supplementary file 4 [file Data_Sheet_2.xlsx]

## Sheet: Sheet 1, All DEGs of OE
Supplementary File 2. Drought stress-responsive genes in JAZ1-OE. Sheet 1, The list of all DEGs in JAZ1-OE. Sheet 2, GO enrichment of all DEGs in JAZ1-OE.
MSU Locus	OE_D_mean	OE_N_mean	log2FC	FDR	regulated
LOC_Os01g01620	183.461	49.3596	1.89407	1.39e-40	up
LOC_Os01g03130	7.3483	3.0692	1.25955	0.000610102	up
LOC_Os01g03320	8.68493	3.3182	1.38811	0.0220557	up
LOC_Os01g03340	6.65802	0.800717	3.05573	5.67e-16	up
LOC_Os01g03360	2.43041	0.170939	3.82965	0.0277198	up
LOC_Os01g03390	126.666	15.6932	3.01281	1.21e-93	up
LOC_Os01g03680	4.2502	1.52663	1.47718	0.00178445	up
LOC_Os01g03710	2.42454	1.10277	1.13658	0.000243064	up
LOC_Os01g03914	17.014	8.30416	1.03481	3.97e-20	up
LOC_Os01g04330	97.5615	19.1332	2.35023	1.6e-11	up
LOC_Os01g04360	29.129	1.91331	3.92832	7.39e-07	up
LOC_Os01g04370	185.496	4.5732	5.34204	3.59e-21	up
LOC_Os01g04380	23.265	5.83603	1.9951	3.66e-05	up
LOC_Os01g04590	22.9769	9.21856	1.31757	2.67e-22	up
LOC_Os01g04670	3.04975	1.1795	1.37051	0.0111312	up
LOC_Os01g05150	6.46374	3.03421	1.09105	0.000158417	up
LOC_Os01g05830	13.475	6.94627	0.955976	6.63e-15	up
LOC_Os01g06310	201.078	18.1471	3.46994	3.35e-37	up
LOC_Os01g06640	19.0837	7.53389	1.34087	8.39e-16	up
LOC_Os01g06740	9.64128	2.20283	2.12987	6.51e-05	up
LOC_Os01g07300	15.9769	6.27043	1.34935	2.14e-07	up
LOC_Os01g09100	4.05059	1.20616	1.74771	0.00357743	up
LOC_Os01g09220	3.45031	0.743977	2.21339	9.59e-08	up
LOC_Os01g09640	89.1027	21.5831	2.04557	3.6e-11	up
LOC_Os01g09660	3.59762	1.32334	1.44286	0.0110318	up
LOC_Os01g09665	0.946478	0.272166	1.79808	0.00343809	up
LOC_Os01g09870	4.08924	0.503659	3.02131	0.000796624	up
LOC_Os01g10320	23.0666	2.63462	3.13014	8.15e-124	up
LOC_Os01g10370	2.8774	0.0640288	5.4899	2.31e-10	up
LOC_Os01g10890	13.1463	5.35685	1.2952	2.86e-08	up
LOC_Os01g11590	291.257	16.504	4.14141	0.000643181	up
LOC_Os01g12490	2.31841	1.02078	1.18346	0.00021802	up
LOC_Os01g12520	40.8286	13.5492	1.59137	5.7e-17	up
LOC_Os01g12580	5.03323	1.17391	2.10016	3.79e-09	up
LOC_Os01g12660	3.39071	0.779922	2.12019	0.000700652	up
LOC_Os01g13930	7.72519	1.46115	2.40247	7.48e-14	up
LOC_Os01g14050	36.2637	17.5303	1.04867	2.31e-32	up
LOC_Os01g15000	30.902	12.4386	1.31287	3.85e-16	up
LOC_Os01g15270	2994.16	488.937	2.61443	7.74e-40	up
LOC_Os01g15650	0.494545	0.112336	2.13828	4.91e-06	up
LOC_Os01g16310	2.59262	0.481658	2.42833	4.12e-11	up
LOC_Os01g16920	2.86854	0.320982	3.15975	8.37e-05	up
LOC_Os01g18160	23.3367	6.61033	1.8198	2.49e-10	up
LOC_Os01g18170	15.6758	6.93076	1.17745	3.02e-06	up
LOC_Os01g18220	17.5964	4.34511	2.01782	1.86e-24	up
LOC_Os01g18230	12.487	3.69005	1.75872	2.28e-06	up
LOC_Os01g18860	1.56966	0.630638	1.31557	0.0041437	up
LOC_Os01g19770	1.97784	0.25897	2.93307	0.000129628	up
LOC_Os01g20206	13.7823	7.20012	0.936726	0.00120303	up
LOC_Os01g20860	6.12074	3.13468	0.965387	3.18e-18	up
LOC_Os01g21250	223.7	67.5882	1.72672	2.5e-11	up
LOC_Os01g21420	58.9259	28.1783	1.06432	8.58e-29	up
LOC_Os01g22352	13.8876	5.52384	1.33005	3.32e-09	up
LOC_Os01g23990	107.945	38.8761	1.47335	2.18e-11	up
LOC_Os01g24820	0.454308	0.0367276	3.62873	7.08e-08	up
LOC_Os01g25990	44.9743	18.4465	1.28575	1.33e-50	up
LOC_Os01g27449	6.54513	1.78049	1.87815	2.33e-07	up
LOC_Os01g28790	45.7118	22.7875	1.00433	0.00937889	up
LOC_Os01g28840	3.20259	0.516887	2.63132	1.15e-11	up
LOC_Os01g32330	372.729	169.986	1.13271	7.17e-35	up
LOC_Os01g32780	92.7135	18.6062	2.317	9.94e-19	up
LOC_Os01g36220	34.0118	16.7454	1.02227	2.17e-18	up
LOC_Os01g36790	2.32839	0.773639	1.5896	3.32e-11	up
LOC_Os01g37810	6.52135	2.80472	1.21731	0.0262422	up
LOC_Os01g40070	28.0141	12.0798	1.21356	2.15e-05	up
LOC_Os01g40094	182.301	44.1839	2.04473	9.57e-64	up
LOC_Os01g40190	8.42195	2.31098	1.86565	0.0024776	up
LOC_Os01g40280	16.7698	4.80154	1.8043	7.98e-35	up
LOC_Os01g41420	2.03936	0.623035	1.71073	0.000914584	up
LOC_Os01g41720	1.87554	0.41678	2.16995	1.47e-09	up
LOC_Os01g41890	2.15355	0.981746	1.13329	2.42e-06	up
LOC_Os01g42090	28.919	13.7644	1.07108	2.72e-10	up
LOC_Os01g42690	3.35749	0.890089	1.91536	3.72e-07	up
LOC_Os01g42860	36.1395	10.113	1.83736	2.34e-13	up
LOC_Os01g43740	7.10256	2.83527	1.32486	3.83e-11	up
LOC_Os01g44250	6.2851	2.1643	1.53804	3.79e-13	up
LOC_Os01g45090	2.1399	0.44733	2.25813	0.000694602	up
LOC_Os01g45460	3.30543	1.44919	1.18959	1.71e-07	up
LOC_Os01g45470	3472.6	1442.82	1.26713	9.52e-09	up
LOC_Os01g45640	205.459	52.5141	1.96807	1.3e-29	up
LOC_Os01g45659	3.18834	0.1984	4.00632	8.71e-05	up
LOC_Os01g46080	25.0121	12.7783	0.968931	2e-19	up
LOC_Os01g46760	42.5229	18.0658	1.23498	6.19e-31	up
LOC_Os01g46970	17.7217	4.01703	2.14132	6.66e-12	up
LOC_Os01g47490	134.602	45.6396	1.56034	8.98e-73	up
LOC_Os01g47690	51.8069	23.7813	1.12331	4.96e-30	up
LOC_Os01g47760	95.7236	36.467	1.39228	9.14e-07	up
LOC_Os01g48446	7.72133	3.26556	1.24152	3.32e-05	up
LOC_Os01g48940	4.39107	1.15708	1.92408	0.0326539	up
LOC_Os01g48950	57.4478	16.4592	1.80336	0.000632294	up
LOC_Os01g49280	3.77108	1.7624	1.09744	6.94e-06	up
LOC_Os01g49710	27.0211	5.75358	2.23155	3.35e-25	up
LOC_Os01g49720	153.642	23.6018	2.7026	4.05e-68	up
LOC_Os01g50370	3.06001	0.649176	2.23686	3.98e-07	up
LOC_Os01g50400	13.6729	0.49766	4.78001	1.11e-15	up
LOC_Os01g50410	7.49102	0.896341	3.06304	8.53e-17	up
LOC_Os01g50420	3.42755	0.222635	3.94442	3.15e-20	up
LOC_Os01g50900	3.88734	0.310203	3.6475	2.01e-05	up
LOC_Os01g50910	103.778	1.68365	5.94577	2.91e-12	up
LOC_Os01g51030	16.6083	5.21124	1.6722	2.16e-06	up
LOC_Os01g52230	48.7386	10.6627	2.19249	5.05e-07	up
LOC_Os01g52260	12.3365	4.34239	1.50637	1.14e-09	up
LOC_Os01g52570	6.85721	2.78169	1.30166	0.0105149	up
LOC_Os01g52730	2.37146	1.07684	1.13898	0.0112773	up
LOC_Os01g52740	10.5115	1.4085	2.89974	1.23e-30	up
LOC_Os01g53090	13.5518	0.934263	3.85851	1.01e-10	up
LOC_Os01g53820	2.83997	1.08983	1.38177	1.44e-06	up
LOC_Os01g53880	12.4023	2.80319	2.14547	5.73e-26	up
LOC_Os01g54030	0.828467	0.181053	2.19404	1.36e-06	up
LOC_Os01g54340	34.3199	12.3102	1.47919	6.41e-21	up
LOC_Os01g54890	30.0466	14.3373	1.06743	0.00017035	up
LOC_Os01g55100	7.45774	3.43006	1.12051	2.5e-05	up
LOC_Os01g55240	11.5893	4.03891	1.52076	1.39e-10	up
LOC_Os01g56380	20.6127	9.23149	1.1589	8.05e-10	up
LOC_Os01g57020	7.97484	3.38257	1.23734	0.00223311	up
LOC_Os01g57250	467.744	218.099	1.10074	0.000978595	up
LOC_Os01g57370	1.76604	0.164361	3.42557	1.58e-07	up
LOC_Os01g57450	15.946	6.18359	1.36667	1.1e-12	up
LOC_Os01g57740	34.8943	17.3263	1.01002	2.45e-21	up
LOC_Os01g57854	4.60055	2.25687	1.02748	0.00623068	up
LOC_Os01g58194	32.8573	6.69627	2.29478	4.02e-54	up
LOC_Os01g58620	39.7021	16.1434	1.29827	3.77e-18	up
LOC_Os01g58640	12.8911	3.69367	1.80325	2.61e-37	up
LOC_Os01g58850	4.54772	0.178683	4.66967	7.86e-10	up
LOC_Os01g60600	2.78057	0.602908	2.20537	1.96e-08	up
LOC_Os01g61680	27.2291	10.0687	1.43527	2.74e-09	up
LOC_Os01g61700	28.4023	5.64409	2.3312	3.91e-32	up
LOC_Os01g62190	5.78392	2.22292	1.37959	0.00628413	up
LOC_Os01g62490	84.7303	13.5528	2.64429	3.56e-43	up
LOC_Os01g62600	9.22742	0.0782669	6.88138	1.61e-28	up
LOC_Os01g62670	3.93883	1.59049	1.30829	3.64e-05	up
LOC_Os01g62760	428.896	87.1021	2.29985	3.81e-48	up
LOC_Os01g62980	97.4346	29.6033	1.71868	1.17e-48	up
LOC_Os01g63230	19.1167	9.50588	1.00794	3.49e-11	up
LOC_Os01g63930	7.55335	2.85034	1.40598	2.38e-12	up
LOC_Os01g64360	34.2293	6.10755	2.48657	1.59e-19	up
LOC_Os01g64470	23.0168	7.865	1.54917	1.39e-12	up
LOC_Os01g64730	52.2288	16.0087	1.70599	9.69e-64	up
LOC_Os01g66440	2.19352	0.792455	1.46884	0.0145632	up
LOC_Os01g67540	49.4201	7.04573	2.81028	1.25e-112	up
LOC_Os01g67810	4.62861	2.26097	1.03364	0.00054663	up
LOC_Os01g68290	263.067	3.52163	6.22305	0	up
LOC_Os01g68540	1.28396	0.41592	1.62622	0.00545785	up
LOC_Os01g68650	47.0626	2.70245	4.12224	2.45e-16	up
LOC_Os01g69100	263.624	100.848	1.3863	7.21e-57	up
LOC_Os01g70500	4.70025	1.66271	1.4992	0.000631581	up
LOC_Os01g70730	9.28123	3.91764	1.24433	0.000149802	up
LOC_Os01g71624	30.709	12.5796	1.28758	0.000922984	up
LOC_Os01g71690	11.5939	4.7321	1.29281	1.13e-05	up
LOC_Os01g72210	3.46591	1.27407	1.44379	1.04e-15	up
LOC_Os01g72360	4.16125	0.324797	3.6794	1.85e-05	up
LOC_Os01g72460	28.198	7.57228	1.89679	6.18e-23	up
LOC_Os01g72530	35.9639	10.4175	1.78754	0.000199922	up
LOC_Os01g72900	8.38161	3.3533	1.32165	0.00139147	up
LOC_Os01g72910	3.50372	1.36485	1.36015	0.029904	up
LOC_Os01g73110	18.0303	1.51477	3.57325	8.02e-41	up
LOC_Os01g74450	608.389	290.838	1.06478	1.94e-35	up
LOC_Os02g01590	69.0605	2.42786	4.8301	1.46e-69	up
LOC_Os02g02730	24.7479	9.9696	1.3117	9.01e-12	up
LOC_Os02g04130	6.17952	2.49651	1.30758	0.00229308	up
LOC_Os02g04369	24.0392	7.65517	1.65088	3.49e-15	up
LOC_Os02g04380	0.269229	0.110972	1.27864	0.0110318	up
LOC_Os02g04640	21.1788	9.12589	1.21459	2.83e-35	up
LOC_Os02g04755	4.53777	1.53628	1.56254	2.42e-08	up
LOC_Os02g04760	14.7918	4.23065	1.80585	7.14e-89	up
LOC_Os02g04780	12.1181	2.72927	2.15058	1.22e-20	up
LOC_Os02g06560	52.7231	22.2902	1.24203	1.5e-12	up
LOC_Os02g06930	5.51565	2.30893	1.25631	1.23e-10	up
LOC_Os02g07930	25.7787	9.06907	1.50715	5.04e-18	up
LOC_Os02g08320	5.01477	1.42436	1.81587	0.000773234	up
LOC_Os02g08440	36.6116	10.6131	1.78646	5.88e-06	up
LOC_Os02g09970	3.5092	1.42614	1.29902	0.0476796	up
LOC_Os02g09980	8.5432	2.90186	1.5578	0.000645024	up
LOC_Os02g10120	311.194	91.5125	1.76577	7.18e-79	up
LOC_Os02g11859	49.5945	22.3556	1.14954	9.39e-05	up
LOC_Os02g11870	28.4806	4.90004	2.53911	1.33e-23	up
LOC_Os02g12150	4.56848	0.873243	2.38726	0.00177719	up
LOC_Os02g13800	22.2864	0.907393	4.61829	1.04e-71	up
LOC_Os02g16690	0.635112	0.248361	1.35457	0.0197269	up
LOC_Os02g22020	2.32885	0.530826	2.13331	1.8e-05	up
LOC_Os02g26470	67.1807	10.2796	2.70826	7.11e-37	up
LOC_Os02g28220	1.97346	0.691854	1.51219	0.00820763	up
LOC_Os02g30610	0.945738	0.126271	2.90491	0.000580483	up
LOC_Os02g30910	48.5693	9.54518	2.3472	5.64e-76	up
LOC_Os02g31030	11.9072	4.05892	1.55267	0.000496179	up
LOC_Os02g32450	76.0506	17.5454	2.11586	2.29e-16	up
LOC_Os02g32520	77.5834	21.3025	1.86473	5.65e-21	up
LOC_Os02g32580	218.305	24.8324	3.13605	1.12e-11	up
LOC_Os02g33330	143.483	55.5067	1.37015	5.78e-10	up
LOC_Os02g33380	99.2108	10.2861	3.2698	2.21e-06	up
LOC_Os02g33680	25.1838	5.78465	2.1222	1.86e-19	up
LOC_Os02g34600	70.7998	29.9419	1.24158	2.03e-43	up
LOC_Os02g34640	11.8048	5.98689	0.979495	0.0143233	up
LOC_Os02g34970	2.45915	0.382521	2.68455	1.01e-09	up
LOC_Os02g35329	16.6048	1.85309	3.1636	1.07e-25	up
LOC_Os02g35760	1.17018	0.570974	1.03523	0.0155522	up
LOC_Os02g35830	65.2163	27.0536	1.26941	1.89e-21	up
LOC_Os02g36490	14.0403	5.37537	1.38513	1.78e-24	up
LOC_Os02g40900	33.2493	14.0699	1.24071	1.29e-09	up
LOC_Os02g41510	2.35416	0.670091	1.81278	0.00429296	up
LOC_Os02g41840	2.40949	0.253832	3.24678	1.57e-05	up
LOC_Os02g41954	40.001	4.12473	3.27766	1.45e-97	up
LOC_Os02g43330	68.057	0.33407	7.67045	2.39e-12	up
LOC_Os02g43540	162.499	46.6469	1.80058	3.25e-63	up
LOC_Os02g43560	1.52416	0.65802	1.21181	0.00885507	up
LOC_Os02g43770	3.94494	0.553769	2.83265	5.53e-05	up
LOC_Os02g43820	3.43165	1.10141	1.63954	0.00426171	up
LOC_Os02g43940	10.4141	4.83938	1.10564	0.0304728	up
LOC_Os02g44770	1.17193	0.376217	1.63925	4.39e-07	up
LOC_Os02g44820	32.7945	8.24709	1.99149	7.28e-23	up
LOC_Os02g44870	208.543	32.6708	2.67427	1.72e-07	up
LOC_Os02g44990	0.424991	0.1821	1.2227	0.0267436	up
LOC_Os02g45040	2.4553	1.10901	1.14662	1.53e-07	up
LOC_Os02g45420	1.05911	0.119686	3.14553	0.000181987	up
LOC_Os02g45930	48.6609	18.7339	1.37711	5.7e-06	up
LOC_Os02g46210	9.13741	3.58032	1.3517	1.85e-09	up
LOC_Os02g46460	11.9412	5.25277	1.1848	1.73e-09	up
LOC_Os02g46473	50.6572	16.72	1.59919	0.0277784	up
LOC_Os02g47320	24.5561	11.2293	1.12881	3.8e-12	up
LOC_Os02g47330	1.91152	1.25074	0.611934	0.000210405	up
LOC_Os02g47470	9.10155	1.9947	2.18994	1.34e-12	up
LOC_Os02g47840	29.0949	9.97286	1.54469	2.44e-22	up
LOC_Os02g49860	11.0433	5.05327	1.12788	1.15e-05	up
LOC_Os02g49986	8.6318	1.53127	2.49493	6.47e-06	up
LOC_Os02g50404	2.33654	0.649386	1.84722	0.0172736	up
LOC_Os02g50690	3.43449	1.67736	1.0339	0.00678204	up
LOC_Os02g51040	23.2813	8.73952	1.41355	0.0306679	up
LOC_Os02g51750	40.61	11.9036	1.77044	3.06e-29	up
LOC_Os02g51890	2.26242	1.21128	0.901338	1.91e-05	up
LOC_Os02g52010	13.7424	4.45386	1.6255	4.88e-05	up
LOC_Os02g52210	34.7189	4.62482	2.90825	9.53e-59	up
LOC_Os02g52670	10.7839	2.64288	2.0287	4.69e-08	up
LOC_Os02g52780	99.8785	18.0858	2.46532	5.29e-37	up
LOC_Os02g53320	14.3149	6.13732	1.22184	1.06e-09	up
LOC_Os02g53410	27.1054	10.3213	1.39295	1.29e-08	up
LOC_Os02g54140	83.1952	29.9523	1.47383	0.000386219	up
LOC_Os02g54254	17.0423	8.16933	1.06083	2.97e-32	up
LOC_Os02g54820	46.8934	18.3004	1.35751	7.22e-06	up
LOC_Os02g55134	80.9406	25.1277	1.68758	4.03e-37	up
LOC_Os02g55250	11.5353	4.87909	1.24137	4.91e-08	up
LOC_Os02g56120	1.89058	0.378247	2.32143	0.000354341	up
LOC_Os02g57280	111.093	35.9234	1.62877	2.8e-39	up
LOC_Os02g57840	43.7667	1.7132	4.67506	1.73e-19	up
LOC_Os03g01880	9.65721	3.88754	1.31275	0.000426099	up
LOC_Os03g02050	17.8159	2.31169	2.94614	3.2e-22	up
LOC_Os03g02390	45.6119	22.8639	0.996339	4.62e-07	up
LOC_Os03g03370	59.0877	10.597	2.4792	7.67e-08	up
LOC_Os03g03810	148.215	11.815	3.649	6.81e-131	up
LOC_Os03g03980	4.87857	2.16049	1.1751	0.0079026	up
LOC_Os03g04080	2.96628	0.241883	3.61627	0.000574201	up
LOC_Os03g04130	7.08562	1.7315	2.03287	3.14e-19	up
LOC_Os03g04770	107.848	30.251	1.83394	5.09e-73	up
LOC_Os03g05210	2.75577	1.17983	1.22388	0.00970212	up
LOC_Os03g05310	62.2035	26.9419	1.20714	1.09e-28	up
LOC_Os03g05440	2.45362	0.672985	1.86626	0.00163193	up
LOC_Os03g06250	6.28453	1.86269	1.75442	1.39e-08	up
LOC_Os03g06290	5.47725	2.53368	1.11222	3.68e-08	up
LOC_Os03g06360	20.4241	6.92893	1.55957	5.91e-12	up
LOC_Os03g06520	181.957	81.1258	1.16537	4.61e-35	up
LOC_Os03g07180	7.2332	0.332751	4.44212	9.16e-67	up
LOC_Os03g07200	34.5568	13.8119	1.32306	3.38e-18	up
LOC_Os03g08330	75.1753	34.2057	1.13602	8.84e-11	up
LOC_Os03g08520	2.46969	0.709742	1.79896	0.00825944	up
LOC_Os03g08540	1.8406	0.553875	1.73254	8.42e-08	up
LOC_Os03g08560	1.38604	0.674738	1.03856	8.99e-05	up
LOC_Os03g09170	15.9889	1.68015	3.25041	6.14e-05	up
LOC_Os03g10310	2.05743	0.815208	1.3356	0.045209	up
LOC_Os03g10320	73.8443	8.32479	3.149	2.58e-121	up
LOC_Os03g10478	2.56686	0.916719	1.48545	0.000667567	up
LOC_Os03g10620	119.042	57.3657	1.05321	1.19e-26	up
LOC_Os03g11910	8.32598	3.35334	1.31202	0.000765789	up
LOC_Os03g12820	15.6937	4.72516	1.73175	4.86e-21	up
LOC_Os03g12860	28.263	7.84872	1.84838	4.8e-06	up
LOC_Os03g13540	166.436	34.9987	2.24959	2.57e-153	up
LOC_Os03g13710	0.261562	0.0594189	2.13816	8.7e-05	up
LOC_Os03g14050	109.781	27.7767	1.98268	9.4e-06	up
LOC_Os03g14180	79.183	4.89103	4.01698	0.000291084	up
LOC_Os03g14420	4.55709	1.89392	1.26674	5.92e-05	up
LOC_Os03g15270	13.7953	2.37109	2.54055	3.96e-06	up
LOC_Os03g15340	21.1825	8.26039	1.35859	2.27e-07	up
LOC_Os03g15960	160.989	43.9139	1.87421	5.6e-11	up
LOC_Os03g16030	24.8734	6.87165	1.85588	4.81e-09	up
LOC_Os03g16170	143.711	14.9711	3.26291	2.61e-48	up
LOC_Os03g16334	36.6669	12.2869	1.57735	6.18e-19	up
LOC_Os03g16600	30.7188	13.5101	1.18509	1.03e-24	up
LOC_Os03g16610	45.3377	11.541	1.97394	4.43e-68	up
LOC_Os03g16670	126.671	40.7341	1.63678	7.71e-43	up
LOC_Os03g16920	20.0175	3.27485	2.61176	3.78e-15	up
LOC_Os03g17790	1639.95	52.6868	4.96007	1.16e-70	up
LOC_Os03g17800	23.7767	10.3662	1.19767	9.69e-19	up
LOC_Os03g18030	1.43038	0.499051	1.51913	0.00133013	up
LOC_Os03g18490	5.37157	0.385575	3.80026	3.15e-08	up
LOC_Os03g18680	55.3071	19.3096	1.51815	1.87e-13	up
LOC_Os03g18850	86.7319	32.3817	1.42138	1.39e-26	up
LOC_Os03g19270	13.0399	5.01709	1.37801	5.34e-08	up
LOC_Os03g19290	426.726	26.1323	4.0294	4.87e-124	up
LOC_Os03g20090	12.7173	4.13425	1.6211	1.81e-13	up
LOC_Os03g20120	213.31	53.6595	1.99105	3.08e-12	up
LOC_Os03g20680	6.89724	0.0670469	6.6847	1.5e-05	up
LOC_Os03g20730	79.2064	33.8656	1.22579	7.37e-07	up
LOC_Os03g20870	21.6465	9.15045	1.24222	1.1e-12	up
LOC_Os03g21000	172.741	81.4077	1.08537	8.99e-33	up
LOC_Os03g21030	50.0204	22.6398	1.14366	1.4e-10	up
LOC_Os03g21060	29.7452	13.1949	1.17268	4.97e-06	up
LOC_Os03g21640	7.63311	2.89577	1.39833	2.07e-18	up
LOC_Os03g22120	30.9005	10.5116	1.55564	4.43e-68	up
LOC_Os03g22620	10.7466	2.45311	2.1312	3.94e-30	up
LOC_Os03g22680	15.1207	7.06363	1.09804	2.38e-09	up
LOC_Os03g22790	88.1105	17.0297	2.37126	8.12e-19	up
LOC_Os03g22960	14.1501	5.8509	1.27408	2.14e-05	up
LOC_Os03g24070	1.46157	0.640959	1.18922	0.0158446	up
LOC_Os03g24730	12.5346	5.3382	1.2315	7.82e-15	up
LOC_Os03g24820	0.912415	0.045463	4.32693	1.63e-05	up
LOC_Os03g25490	0.447206	0.0721815	2.63124	0.000147808	up
LOC_Os03g26490	25.1856	3.81694	2.72211	2.06e-24	up
LOC_Os03g26870	40.9152	8.68876	2.23542	1.93e-09	up
LOC_Os03g27110	7.11559	0.310026	4.52052	1.55e-30	up
LOC_Os03g28300	44.681	22.8748	0.965902	3.27e-32	up
LOC_Os03g30150	3.29587	0.445508	2.88713	0.00224382	up
LOC_Os03g35640	2.56683	0.646519	1.98922	5.7e-11	up
LOC_Os03g36279	0.479393	0.153851	1.63967	3.69e-05	up
LOC_Os03g37770	8.15877	0.347858	4.55178	2.06e-09	up
LOC_Os03g41060	52.0617	13.6197	1.93453	0.0120272	up
LOC_Os03g41390	7.56555	2.52387	1.58381	0.00106881	up
LOC_Os03g42520	0.73578	0.0338148	4.44355	5.98e-05	up
LOC_Os03g42600	126.038	36.8742	1.77318	2.44e-13	up
LOC_Os03g42830	13.2619	3.60799	1.87802	5.17e-24	up
LOC_Os03g43720	6.4132	2.12022	1.59683	4.4e-25	up
LOC_Os03g44150	32.4265	13.4514	1.26941	4.4e-39	up
LOC_Os03g44380	22.1245	1.38262	4.00017	1.89e-23	up
LOC_Os03g44810	1.74678	0.856202	1.02868	5.3e-05	up
LOC_Os03g45194	46.8941	20.9298	1.16385	9.98e-26	up
LOC_Os03g45210	5.33876	0.320297	4.05902	1.43e-22	up
LOC_Os03g45280	16.0202	4.84325	1.72584	1.17e-06	up
LOC_Os03g45720	413.986	171.09	1.27483	4.26e-42	up
LOC_Os03g48310	9.40848	2.56308	1.87608	2.2e-42	up
LOC_Os03g48710	88.8607	29.4388	1.59383	9.91e-35	up
LOC_Os03g48780	32.7978	3.11831	3.39476	3.53e-56	up
LOC_Os03g49430	15.6836	4.74948	1.72341	0.00188407	up
LOC_Os03g49440	48.0084	22.5301	1.09143	8.93e-15	up
LOC_Os03g50470	2.2276	0.975832	1.19078	2.09e-07	up
LOC_Os03g50960	89.5917	16.9657	2.40075	1.03e-53	up
LOC_Os03g51240	12.87	3.72445	1.78891	2.15e-13	up
LOC_Os03g51350	17.8156	0.539517	5.04533	3.31e-30	up
LOC_Os03g51390	13.2465	5.16427	1.35898	0.000126761	up
LOC_Os03g51459	23.8963	12.0618	0.986342	7.3e-08	up
LOC_Os03g52370	9.34507	3.66571	1.35011	0.000796577	up
LOC_Os03g52410	6.31834	2.15641	1.55092	0.0143746	up
LOC_Os03g52910	12.8036	5.22517	1.29299	8.24e-05	up
LOC_Os03g53020	63.4924	19.1084	1.73237	2.69e-49	up
LOC_Os03g53340	1.23122	0.413923	1.57266	9.52e-05	up
LOC_Os03g53540	4.77501	1.7434	1.4536	0.00406313	up
LOC_Os03g54930	1.36704	0.557204	1.29478	2.66e-06	up
LOC_Os03g55380	9.72166	4.35308	1.15916	2.69e-11	up
LOC_Os03g55660	263.29	117.314	1.16628	1.63e-48	up
LOC_Os03g55850	391.157	139.515	1.48733	2.28e-65	up
LOC_Os03g55870	32.0284	14.9779	1.09652	1.57e-18	up
LOC_Os03g57720	0.757556	0.24194	1.6467	0.0204341	up
LOC_Os03g57880	11.8207	5.29638	1.15824	1.77e-08	up
LOC_Os03g58020	51.7926	23.2579	1.15503	1.14e-06	up
LOC_Os03g58170	23.4884	10.7928	1.12188	6.83e-10	up
LOC_Os03g59360	337.877	114.379	1.56268	9.68e-47	up
LOC_Os03g59460	1.58533	0.0860855	4.20287	1.55e-15	up
LOC_Os03g60080	245.544	80.6052	1.60704	2.44e-69	up
LOC_Os03g60260	8.51419	1.11037	2.93883	7.7e-16	up
LOC_Os03g60370	17.942	10.0934	0.829926	1.6e-22	up
LOC_Os03g60560	15.2704	1.20755	3.66058	9.9e-16	up
LOC_Os03g60570	13.0441	0.881081	3.88798	4.21e-23	up
LOC_Os03g60580	336.351	64.1564	2.3903	7.19e-22	up
LOC_Os03g60840	10.6012	4.45011	1.25231	2.4e-06	up
LOC_Os03g61150	132.283	30.8673	2.09948	3.63e-30	up
LOC_Os03g61160	2.986	0.159751	4.22431	0.000158887	up
LOC_Os03g61470	6.80615	1.71822	1.98593	4.11e-05	up
LOC_Os03g63580	5.78972	1.23256	2.23183	7.12e-06	up
LOC_Os04g02650	5.97063	1.43038	2.06149	5.69e-09	up
LOC_Os04g09570	3.52259	1.59353	1.14441	0.0107058	up
LOC_Os04g10690	12.3656	0.551951	4.48565	4.59e-46	up
LOC_Os04g10890	0.319489	0.0605137	2.40043	3.82e-06	up
LOC_Os04g12540	5.21785	2.36266	1.14304	1.24e-20	up
LOC_Os04g17100	291.156	82.4656	1.81993	1.39e-15	up
LOC_Os04g19740	8.73629	2.89326	1.59432	4.68e-35	up
LOC_Os04g20400	6.17732	2.87959	1.10112	5.83e-05	up
LOC_Os04g20749	5.08014	0.234948	4.43446	8.47e-21	up
LOC_Os04g23550	16.7951	1.48543	3.49909	1.93e-53	up
LOC_Os04g24804	14.0795	0.99236	3.82658	3.91e-37	up
LOC_Os04g25440	33.5086	10.2275	1.71208	3.86e-21	up
LOC_Os04g27190	9.75617	2.09582	2.2188	8.35e-10	up
LOC_Os04g27670	19.9602	2.23644	3.15785	6.19e-157	up
LOC_Os04g31710	5.21518	0.294501	4.14637	1.92e-10	up
LOC_Os04g31940	1.7264	0.553536	1.64102	0.00366001	up
LOC_Os04g32110	67.7904	28.7482	1.23761	2.03e-10	up
LOC_Os04g32320	3.04838	0.120054	4.66629	6.92e-18	up
LOC_Os04g32980	19.7161	7.93202	1.31361	5.73e-19	up
LOC_Os04g33920	25.9561	0.902457	4.84607	3.13e-79	up
LOC_Os04g34610	338.727	72.0582	2.23289	2.5e-125	up
LOC_Os04g35100	46.4403	5.77049	3.00861	7.24e-46	up
LOC_Os04g36600	100.78	31.5668	1.67472	1.22e-31	up
LOC_Os04g36750	12.4585	0.391278	4.99279	0.000667352	up
LOC_Os04g37880	12.0599	2.42522	2.31403	7.14e-07	up
LOC_Os04g38780	0.404354	0.216804	0.899226	0.000805902	up
LOC_Os04g40070	1.18427	0.275794	2.10233	7.3e-16	up
LOC_Os04g40560	11.4699	4.42496	1.37411	0.00501387	up
LOC_Os04g40590	4.69786	1.00507	2.2247	3.9e-05	up
LOC_Os04g40990	24.3324	4.64887	2.38793	8.55e-19	up
LOC_Os04g41620	120.451	55.3444	1.12194	0.00462763	up
LOC_Os04g41640	2209.06	985.109	1.16508	3.32e-05	up
LOC_Os04g41960	102.379	23.4101	2.12871	4.49e-81	up
LOC_Os04g42950	6.30011	1.27346	2.30663	1.01e-16	up
LOC_Os04g43200	88.3888	6.13287	3.84923	1.38e-218	up
LOC_Os04g43390	127.034	58.929	1.10817	3.79e-49	up
LOC_Os04g43519	2.31514	0.621556	1.89714	0.00417301	up
LOC_Os04g43710	43.7371	11.6374	1.91009	2.16e-29	up
LOC_Os04g44500	53.8145	10.1916	2.40061	5.43e-62	up
LOC_Os04g45810	168.641	27.1197	2.63654	3.94e-162	up
LOC_Os04g46220	10.2553	4.79817	1.09582	7.53e-13	up
LOC_Os04g47140	106.562	24.4002	2.12673	3.24e-33	up
LOC_Os04g47170	0.603772	0.266218	1.1814	0.0128718	up
LOC_Os04g48070	4.96688	1.38387	1.84363	1.1e-23	up
LOC_Os04g48260	4.87495	2.15185	1.17981	6.67e-07	up
LOC_Os04g48270	26.2994	8.54484	1.6219	8.26e-16	up
LOC_Os04g48290	1.1906	0.550446	1.11301	0.000819554	up
LOC_Os04g49360	2.60185	0.554727	2.22969	9.73e-05	up
LOC_Os04g49370	1.48514	0.626488	1.24523	0.0154782	up
LOC_Os04g49680	39.7772	17.9667	1.14662	3.92e-16	up
LOC_Os04g49980	24.6844	1.73523	3.8304	3.27e-41	up
LOC_Os04g51130	2.21627	0.843906	1.39298	1.49e-05	up
LOC_Os04g51160	19.7709	8.50918	1.21629	1.89e-07	up
LOC_Os04g51410	68.3747	26.417	1.37199	1.45e-25	up
LOC_Os04g51610	59.989	18.641	1.68622	6.72e-66	up
LOC_Os04g51660	3.77182	0.875675	2.1068	3.6e-05	up
LOC_Os04g51796	1.475	0.0263047	5.80925	3.6e-28	up
LOC_Os04g51820	5.6517	1.48115	1.93196	1.99e-25	up
LOC_Os04g51930	0.329082	0.132467	1.31282	0.000546312	up
LOC_Os04g52090	36.7803	14.7844	1.31486	5.78e-11	up
LOC_Os04g52110	2.0852	0.0608806	5.09806	1.06e-06	up
LOC_Os04g52390	20.0703	10.3102	0.960998	4.82e-27	up
LOC_Os04g52950	34.3007	15.4844	1.14743	2.82e-07	up
LOC_Os04g53750	2.10855	0.953217	1.14538	2.62e-06	up
LOC_Os04g53930	3.88827	1.16934	1.73344	5.9e-06	up
LOC_Os04g53990	5.61092	2.28409	1.29662	0.000576887	up
LOC_Os04g54210	235.495	36.9091	2.67364	9.77e-11	up
LOC_Os04g55200	7.68888	3.15818	1.28368	7.22e-08	up
LOC_Os04g55520	58.8783	26.6346	1.14443	7.63e-08	up
LOC_Os04g55850	47.9855	18.0834	1.40794	2.96e-23	up
LOC_Os04g55950	11.1689	3.05027	1.87248	0.000443491	up
LOC_Os04g58030	2.86534	0.865374	1.72731	1.26e-07	up
LOC_Os04g58280	98.4045	34.4217	1.51541	3.39e-07	up
LOC_Os04g58710	97.3357	22.6822	2.10141	1.94e-46	up
LOC_Os04g58810	7.58803	2.42857	1.64362	0.00275098	up
LOC_Os04g58890	57.7674	26.0493	1.14901	4.51e-22	up
LOC_Os04g59190	12.9254	5.05028	1.35577	7.71e-05	up
LOC_Os04g59540	7.96812	1.61546	2.3023	3.88e-34	up
LOC_Os05g03130	31.5363	1.3939	4.49981	2.04e-15	up
LOC_Os05g03760	148.689	69.861	1.08973	4.24e-09	up
LOC_Os05g03920	11.3326	1.04858	3.43396	2.77e-09	up
LOC_Os05g04700	568.797	181.073	1.65134	6.08e-07	up
LOC_Os05g04710	18.197	20.8923	-0.199272	0.000101851	up
LOC_Os05g05060	126.328	57.7043	1.13042	2.15e-26	up
LOC_Os05g05930	15.9958	0.118151	7.08092	2.09e-25	up
LOC_Os05g06399	35.7928	7.15673	2.3223	3.72e-36	up
LOC_Os05g07810	5.6166	0.911017	2.62415	8.94e-10	up
LOC_Os05g07890	56.4737	6.87889	3.03733	5.32e-39	up
LOC_Os05g08420	123.529	46.5953	1.4066	9.11e-06	up
LOC_Os05g08750	10.9793	4.88187	1.16928	3.38e-05	up
LOC_Os05g10670	84.1647	22.088	1.92995	9.07e-54	up
LOC_Os05g10690	40.8585	16.4474	1.31278	1.45e-18	up
LOC_Os05g11130	3.54658	1.40567	1.33517	7.87e-06	up
LOC_Os05g12040	3.12755	0.225088	3.79647	4.28e-19	up
LOC_Os05g12630	45.4955	7.40283	2.61958	6.14e-43	up
LOC_Os05g15530	4.68892	1.57454	1.57433	0.00412766	up
LOC_Os05g15770	19.5924	3.79426	2.3684	5.32e-25	up
LOC_Os05g16980	0.59079	0.110084	2.42404	1.87e-10	up
LOC_Os05g18470	34.142	15.6717	1.12339	1.38e-27	up
LOC_Os05g20560	0.414681	0.0759457	2.44896	0.00360591	up
LOC_Os05g23440	10.8919	5.01807	1.11805	2.43e-13	up
LOC_Os05g25040	1.11257	0.222559	2.32164	2.74e-07	up
LOC_Os05g25260	43.386	17.8895	1.27812	1.24e-14	up
LOC_Os05g26660	3.5515	1.60407	1.14669	1.84e-09	up
LOC_Os05g27010	25.4606	10.8496	1.23063	6.51e-07	up
LOC_Os05g27060	0.142128	0.0673823	1.07674	0.00593415	up
LOC_Os05g27780	201.084	33.5389	2.58389	1.38e-49	up
LOC_Os05g28740	910.208	25.9609	5.13179	6.89e-25	up
LOC_Os05g28830	5.50399	2.37512	1.21248	1.25e-07	up
LOC_Os05g31020	51.6888	3.67091	3.81564	1.59e-114	up
LOC_Os05g31670	19.6985	0.487214	5.33738	2.92e-43	up
LOC_Os05g33130	3.48433	1.05911	1.71803	0.00097261	up
LOC_Os05g33310	52.076	21.8846	1.2507	1.21e-30	up
LOC_Os05g34830	78.0311	21.513	1.85884	3.28e-11	up
LOC_Os05g36040	0.336391	0.0646289	2.37988	0.0160333	up
LOC_Os05g37060	1.71516	0.110652	3.95425	0.000151589	up
LOC_Os05g37250	8.18309	4.15304	0.978478	7.44e-08	up
LOC_Os05g37660	7.01357	3.35374	1.06438	0.000243532	up
LOC_Os05g37700	16.5001	7.68929	1.10155	8.34e-32	up
LOC_Os05g38260	26.5301	13.0638	1.02206	0.0279241	up
LOC_Os05g38290	132.807	6.03837	4.45903	9.07e-248	up
LOC_Os05g38530	106.092	49.1063	1.11133	0.00771954	up
LOC_Os05g38660	55.2985	16.1619	1.77464	1.65e-19	up
LOC_Os05g38860	6.66897	1.81654	1.87627	4.06e-07	up
LOC_Os05g39240	81.6819	35.3899	1.20668	6.64e-10	up
LOC_Os05g39250	143.366	8.34483	4.10268	2.04e-123	up
LOC_Os05g40010	139.916	65.9591	1.08492	1.15e-23	up
LOC_Os05g41490	87.8992	4.13982	4.40821	2.95e-73	up
LOC_Os05g41620	14.9768	6.47445	1.2099	3.28e-07	up
LOC_Os05g41780	95.748	45.3744	1.07736	1.34e-07	up
LOC_Os05g42070	11.005	2.04044	2.43121	9.54e-09	up
LOC_Os05g42200	4.18873	2.24758	0.89814	4.38e-09	up
LOC_Os05g42210	7.8299	3.79963	1.04313	1.32e-16	up
LOC_Os05g42230	4.5366	1.30722	1.79512	0.0143881	up
LOC_Os05g43110	0.582569	0.0433321	3.74892	7.56e-05	up
LOC_Os05g44030	3.02889	0.43454	2.80123	2.22e-05	up
LOC_Os05g44060	8.13039	1.81774	2.16118	7.78e-06	up
LOC_Os05g44340	8.75249	2.23563	1.96901	3.29e-06	up
LOC_Os05g44900	25.1799	2.79586	3.17091	3.02e-09	up
LOC_Os05g45090	3.94297	1.64138	1.26438	0.000749582	up
LOC_Os05g45100	1.36433	0.433718	1.65336	0.0210451	up
LOC_Os05g45140	1.18608	0.470989	1.33244	0.00196583	up
LOC_Os05g46040	137.975	32.2631	2.09644	5.78e-119	up
LOC_Os05g46350	3.59263	0.88384	2.02318	1.08e-12	up
LOC_Os05g46480	72.1785	1.8437	5.29089	2.43e-200	up
LOC_Os05g46750	1.94237	0.238615	3.02506	5.55e-11	up
LOC_Os05g46760	8.89638	2.7893	1.67332	7.63e-05	up
LOC_Os05g47700	513.421	98.9539	2.37531	2.2e-148	up
LOC_Os05g47730	26.3657	0.44252	5.89677	5.43e-49	up
LOC_Os05g47960	13.9531	2.58993	2.4296	2.79e-09	up
LOC_Os05g48200	8.94716	2.57928	1.79446	7.46e-64	up
LOC_Os05g48330	14.9953	6.02043	1.31657	0.000170036	up
LOC_Os05g48340	13.7678	4.99485	1.46279	1.05e-37	up
LOC_Os05g48650	18.0836	2.72309	2.73137	3.14e-06	up
LOC_Os05g48680	10.5565	4.05847	1.37913	0.0060154	up
LOC_Os05g49170	73.6529	27.0768	1.44369	4.69e-40	up
LOC_Os05g49300	68.3628	30.3333	1.17231	9.07e-23	up
LOC_Os05g49350	59.3573	22.564	1.3954	4.44e-20	up
LOC_Os05g49420	24.6133	8.09405	1.6045	2.86e-12	up
LOC_Os05g49440	1.44967	0.172677	3.06958	0.000955713	up
LOC_Os05g49700	62.5761	10.7757	2.53783	3.63e-54	up
LOC_Os05g49730	37.8659	3.4333	3.46323	4.45e-28	up
LOC_Os05g49770	30.1822	14.0577	1.10234	0.000598059	up
LOC_Os05g49940	109.406	28.802	1.92546	6.54e-07	up
LOC_Os05g50470	12.1861	3.14641	1.95346	3.95e-12	up
LOC_Os05g50490	8.9741	2.7781	1.69167	2.95e-09	up
LOC_Os05g50850	3.8544	1.34519	1.51869	0.00323698	up
LOC_Os05g51630	20.7739	10.1339	1.03558	1.38e-30	up
LOC_Os05g51670	89.8788	35.7425	1.33034	1.53e-33	up
LOC_Os06g02040	9.006	0.16278	5.78989	4.92e-28	up
LOC_Os06g03670	3.13119	0.131728	4.57107	3.58e-11	up
LOC_Os06g03930	66.2684	32.7683	1.01602	8.97e-33	up
LOC_Os06g04090	33.5499	9.58902	1.80685	3.36e-17	up
LOC_Os06g04230	154.111	29.5388	2.38329	7.88e-06	up
LOC_Os06g04240	25.3452	3.18505	2.99232	1.37e-17	up
LOC_Os06g04480	38.061	18.356	1.05206	2.22e-10	up
LOC_Os06g04889	56.4886	17.6739	1.67634	5.43e-11	up
LOC_Os06g05410	20.5698	9.12015	1.1734	0.00212458	up
LOC_Os06g05420	9.49204	1.15716	3.03613	0.00034924	up
LOC_Os06g05940	13.8434	6.17238	1.1653	7.35e-05	up
LOC_Os06g07030	41.5234	5.04389	3.04131	1.83e-77	up
LOC_Os06g07220	2.71037	0.234888	3.52845	0.000447753	up
LOC_Os06g07600	23.0346	10.2568	1.16723	3.29e-20	up
LOC_Os06g09310	4.07878	1.99182	1.03405	0.0104828	up
LOC_Os06g10530	31.3008	8.01366	1.96567	5.2e-13	up
LOC_Os06g11090	7.93888	2.5985	1.61125	1.93e-11	up
LOC_Os06g11600	5.83131	2.59733	1.16679	1.65e-13	up
LOC_Os06g11980	286.046	47.7403	2.58296	1.56e-165	up
LOC_Os06g12370	4.01361	0.104831	5.25877	7.01e-07	up
LOC_Os06g13560	31.6562	14.1777	1.15887	2.69e-06	up
LOC_Os06g13720	20.388	0.861889	4.56407	2.04e-119	up
LOC_Os06g14670	29.7259	1.92164	3.95131	4.62e-41	up
LOC_Os06g16630	3.58995	1.28889	1.47784	1.16e-05	up
LOC_Os06g19200	14.8183	4.72792	1.6481	3.2e-11	up
LOC_Os06g19630	0.523233	0.0186787	4.80799	7.62e-06	up
LOC_Os06g20310	0.699146	0.188167	1.89358	0.000875941	up
LOC_Os06g21910	4.52524	0.0557637	6.34253	3.27e-07	up
LOC_Os06g22060	42.499	12.9578	1.71361	3.28e-87	up
LOC_Os06g23360	1.42685	0.922755	0.628819	0.00436124	up
LOC_Os06g23684	8.84551	2.66725	1.72959	4.07e-26	up
LOC_Os06g24190	77.3069	25.2569	1.61392	5.57e-16	up
LOC_Os06g24730	118.161	56.0832	1.07511	1.52e-14	up
LOC_Os06g24990	34.4186	8.018	2.10188	5.36e-09	up
LOC_Os06g25010	40.8826	8.28646	2.30266	1.52e-42	up
LOC_Os06g27910	6.66167	0.63953	3.3808	1.03e-26	up
LOC_Os06g28670	2.81333	1.22451	1.20008	0.0174536	up
LOC_Os06g29180	109.566	54.5873	1.00516	9.6e-32	up
LOC_Os06g29790	2.14456	0.897357	1.25693	2.4e-06	up
LOC_Os06g30179	2.60697	0.907451	1.52248	3.28e-07	up
LOC_Os06g30370	101.527	3.80664	4.73721	6.14e-25	up
LOC_Os06g32600	220.5	41.4535	2.41122	7.22e-45	up
LOC_Os06g32650	10.0861	6.97083	0.532962	7.96e-05	up
LOC_Os06g33970	5.24282	1.67522	1.646	0.0032865	up
LOC_Os06g35960	28.3053	3.14565	3.16964	1.6e-48	up
LOC_Os06g37150	3.54209	1.49768	1.24187	1.23e-11	up
LOC_Os06g40120	44.748	20.2008	1.14741	5.67e-20	up
LOC_Os06g40210	107.162	41.0148	1.38558	2.27e-18	up
LOC_Os06g40809	7.57428	2.97763	1.34694	0.0377256	up
LOC_Os06g43020	5.53259	1.6779	1.7213	5.77e-10	up
LOC_Os06g44190	578.002	68.087	3.08562	2.05e-10	up
LOC_Os06g44260	26.4671	5.00372	2.40313	1.17e-45	up
LOC_Os06g45184	2.17636	0.786984	1.46751	0.000345301	up
LOC_Os06g45710	106.332	28.9618	1.87635	5.7e-113	up
LOC_Os06g46740	40.1325	3.68782	3.44393	1.89e-56	up
LOC_Os06g46900	27.55	13.6382	1.0144	0.00522533	up
LOC_Os06g46920	16.7665	2.17789	2.94459	1.38e-38	up
LOC_Os06g46950	69.6564	28.131	1.3081	5.29e-05	up
LOC_Os06g48210	3.93255	1.31993	1.57501	1.69e-10	up
LOC_Os06g48300	54.538	7.14355	2.93255	2.2e-122	up
LOC_Os06g48500	7.78966	1.73477	2.16682	0.00267774	up
LOC_Os06g49640	218.05	64.6741	1.7534	6.88e-88	up
LOC_Os06g49660	18.4413	6.83822	1.43125	5.11e-10	up
LOC_Os06g50230	45.2571	13.0462	1.79451	0.00149864	up
LOC_Os06g50400	2.89533	0.518754	2.4806	0.00263553	up
LOC_Os06g51260	28.9775	13.7203	1.07862	1.43e-06	up
LOC_Os06g51440	9.51172	0.0153866	9.27189	2.78e-12	up
LOC_Os07g01340	1.20518	0.303608	1.98896	0.0028735	up
LOC_Os07g02850	2.17836	0.565191	1.94644	0.00197309	up
LOC_Os07g04040	1.29827	0.5346	1.28006	0.000329821	up
LOC_Os07g05365	3.43054	0.600296	2.51469	2.28e-06	up
LOC_Os07g05940	15.0503	0.533493	4.81818	0.00383189	up
LOC_Os07g06460	7.22217	2.70275	1.41801	0.000318011	up
LOC_Os07g07040	23.8861	9.17592	1.38025	1.33e-33	up
LOC_Os07g07410	43.5706	14.3731	1.59999	2.01e-18	up
LOC_Os07g07860	4.32879	1.04082	2.05625	0.00757959	up
LOC_Os07g08320	1.37971	0.370878	1.89535	6.64e-10	up
LOC_Os07g08360	4.50649	1.73959	1.37325	0.00749971	up
LOC_Os07g08390	38.1728	14.8196	1.36504	1.17e-22	up
LOC_Os07g09050	1.85756	0.726784	1.35381	0.0161113	up
LOC_Os07g09420	10.0539	4.39801	1.19283	1.27e-06	up
LOC_Os07g10840	322.592	14.5476	4.47085	0	up
LOC_Os07g12390	38.8097	15.6615	1.3092	6.99e-07	up
LOC_Os07g13834	37.9296	17.2537	1.13642	2.45e-06	up
LOC_Os07g14600	27.9188	4.79236	2.54243	1.19e-30	up
LOC_Os07g15959	47.5464	6.47444	2.87651	5.43e-64	up
LOC_Os07g16970	5.23748	2.42747	1.10942	1.28e-11	up
LOC_Os07g23120	368.345	140.078	1.39483	6.94e-53	up
LOC_Os07g23570	1.23901	0.308857	2.00418	0.00059739	up
LOC_Os07g31390	12.6065	4.77162	1.40162	3.63e-09	up
LOC_Os07g32010	25.764	8.80807	1.54846	1.44e-18	up
LOC_Os07g33280	4.41938	1.99286	1.14901	0.0259051	up
LOC_Os07g34520	7.75483	2.32766	1.73621	0.00681189	up
LOC_Os07g35140	5.29269	1.93872	1.4489	1.55e-09	up
LOC_Os07g35480	8.27043	2.89263	1.51558	2.49e-18	up
LOC_Os07g36400	4.62022	2.04956	1.17265	2.3e-08	up
LOC_Os07g37210	5.34607	1.30016	2.03979	1.17e-06	up
LOC_Os07g37620	6.57924	2.30874	1.51082	4.36e-07	up
LOC_Os07g37690	4.2416	1.02716	2.04595	9.06e-06	up
LOC_Os07g38290	20.2498	9.38162	1.11	1.61e-07	up
LOC_Os07g39190	3.84187	1.33248	1.52769	0.000528078	up
LOC_Os07g40290	10.7427	3.85896	1.47707	0.000496526	up
LOC_Os07g40300	3.35269	1.05253	1.67146	0.00114548	up
LOC_Os07g41160	35.0993	11.8148	1.57085	3.83e-20	up
LOC_Os07g41320	37.8708	6.43607	2.55683	1.36e-72	up
LOC_Os07g42220	41.0127	16.4071	1.32176	1.09e-09	up
LOC_Os07g42250	28.5654	13.1562	1.11853	3.27e-15	up
LOC_Os07g42280	7.29524	2.8362	1.363	1.99e-17	up
LOC_Os07g42700	19.2187	9.42423	1.02806	1.9e-30	up
LOC_Os07g43950	77.2343	33.4692	1.20641	2.19e-17	up
LOC_Os07g44410	8.69242	1.76607	2.29921	1.58e-15	up
LOC_Os07g44850	9.29223	1.84541	2.33209	5.28e-11	up
LOC_Os07g45530	0.253797	0.0871652	1.54185	0.00328798	up
LOC_Os07g45550	0.202824	0.0352751	2.52351	6.66e-05	up
LOC_Os07g46990	605.124	283.902	1.09184	3.76e-32	up
LOC_Os07g47400	43.184	18.8048	1.1994	1.37e-08	up
LOC_Os07g48120	1.16763	0.354512	1.71968	1.81e-05	up
LOC_Os07g48160	17.6888	8.82668	1.00289	1.45e-15	up
LOC_Os07g48450	49.5811	14.1751	1.80643	4.78e-09	up
LOC_Os07g48460	36.136	14.0553	1.36232	5.74e-22	up
LOC_Os07g48510	38.6326	14.8379	1.38053	0.00317389	up
LOC_Os07g48630	58.1675	24.1988	1.26528	6.42e-08	up
LOC_Os07g48680	5.87916	0.873774	2.75028	6.67e-05	up
LOC_Os07g48830	89.0136	14.1562	2.6526	5.2e-11	up
LOC_Os07g49114	36.569	17.1084	1.09591	0.0255112	up
LOC_Os07g49390	17.2542	7.06019	1.28917	3.06e-22	up
LOC_Os08g01370	53.6465	0.938631	5.83678	3.37e-06	up
LOC_Os08g01530	8.02166	2.51365	1.67411	3.5e-06	up
LOC_Os08g01910	34.138	3.82157	3.15914	7.64e-44	up
LOC_Os08g02030	2.65671	0.692024	1.94075	0.000371172	up
LOC_Os08g02070	21.3966	7.45928	1.52027	4.79e-27	up
LOC_Os08g04430	673.819	270.896	1.31462	8.12e-50	up
LOC_Os08g04560	6.19239	1.36695	2.17954	6.49e-14	up
LOC_Os08g06010	29.7633	11.6127	1.35783	6.15e-46	up
LOC_Os08g07690	17.9736	5.57019	1.69008	3.15e-14	up
LOC_Os08g08440	10.8291	1.58611	2.77136	8.28e-12	up
LOC_Os08g10500	725.192	55.3744	3.71107	1.43e-11	up
LOC_Os08g12449	46.4506	16.7368	1.47267	2.28e-19	up
LOC_Os08g13710	4.32728	0.392309	3.4634	1.54e-09	up
LOC_Os08g14310	20.6584	8.80041	1.23108	1.03e-07	up
LOC_Os08g14350	116.296	39.072	1.5736	5.05e-23	up
LOC_Os08g18974	1.91326	0.036245	5.72211	2.17e-16	up
LOC_Os08g19420	7.9085	1.31783	2.58524	4.58e-19	up
LOC_Os08g23870	4.32742	0.368765	3.55273	2.66e-06	up
LOC_Os08g24190	1.1458	0.519619	1.14082	0.0213001	up
LOC_Os08g24750	2.49194	1.15596	1.10818	0.0276907	up
LOC_Os08g25690	5.27215	2.37717	1.14915	0.00615973	up
LOC_Os08g29600	65.4851	9.26241	2.82171	1.4e-39	up
LOC_Os08g30014	2.26501	0.655532	1.78878	0.0265363	up
LOC_Os08g30510	57.5977	15.0079	1.94029	0.000396598	up
LOC_Os08g30540	10.0695	0.591401	4.08971	9.07e-19	up
LOC_Os08g30550	2.34179	0.127991	4.1935	2.59e-10	up
LOC_Os08g30850	0.228589	0.0737485	1.63207	0.0266164	up
LOC_Os08g31090	3.7388	0.60193	2.6349	6.28e-06	up
LOC_Os08g31200	6.94442	1.12752	2.6227	1.05e-12	up
LOC_Os08g31580	104.793	39.3588	1.41279	4.73e-30	up
LOC_Os08g31850	2.28276	0.72873	1.64733	0.00300311	up
LOC_Os08g31860	74.4821	11.321	2.71789	3.54e-16	up
LOC_Os08g32060	7.915	0.933865	3.0833	7.14e-13	up
LOC_Os08g32980	389.822	118.269	1.72074	1.57e-43	up
LOC_Os08g33710	311.729	49.5668	2.65285	1.65e-193	up
LOC_Os08g34170	3.32904	1.56288	1.0909	6.3e-05	up
LOC_Os08g34390	52.371	0.596995	6.45491	7.58e-99	up
LOC_Os08g34500	15.4991	4.18489	1.88892	3.77e-20	up
LOC_Os08g35860	55.7846	13.5281	2.0439	6.99e-62	up
LOC_Os08g36440	15.6143	4.66457	1.74305	7.75e-11	up
LOC_Os08g36920	5.55722	0.233091	4.5754	3.2e-06	up
LOC_Os08g37104	9.59465	3.36287	1.51254	1.38e-06	up
LOC_Os08g37130	29.0929	12.1912	1.25483	1.44e-09	up
LOC_Os08g37180	1.5391	0.418287	1.87952	0.00336219	up
LOC_Os08g37470	2.34957	0.434284	2.43568	0.000909358	up
LOC_Os08g37874	27.9288	10.1104	1.46592	1.09e-27	up
LOC_Os08g38020	0.855628	0.280586	1.60854	0.00510947	up
LOC_Os08g38460	180.755	61.9405	1.54508	7.06e-26	up
LOC_Os08g39370	216.615	52.1523	2.05433	5.26e-98	up
LOC_Os08g41520	9.29299	4.02895	1.20574	0.00176289	up
LOC_Os08g43120	1.31603	0.515362	1.35253	2.15e-08	up
LOC_Os08g43290	16.4614	7.41232	1.15109	7.01e-05	up
LOC_Os08g44360	52.4274	20.3642	1.36429	0.037212	up
LOC_Os09g02180	253.315	12.3038	4.36376	0.000124019	up
LOC_Os09g02270	18.168	8.73143	1.05711	2.01e-11	up
LOC_Os09g03190	1.34457	0.6715	1.00169	0.00190266	up
LOC_Os09g09040	17.8826	1.45093	3.62351	6.05e-28	up
LOC_Os09g09650	1.52248	0.52574	1.534	0.000215309	up
LOC_Os09g09944	10.2945	4.79554	1.10211	0.000923378	up
LOC_Os09g10620	5.39443	0.347865	3.95487	6.63e-05	up
LOC_Os09g15670	170.61	10.3753	4.03948	4.44e-83	up
LOC_Os09g17560	66.8319	8.49896	2.97518	2.11e-167	up
LOC_Os09g18090	0.740055	0.335715	1.1404	1.43e-05	up
LOC_Os09g20930	72.6475	22.7288	1.67639	1.08e-87	up
LOC_Os09g21120	14.9169	0.572788	4.70281	1.95e-07	up
LOC_Os09g21710	15.5923	6.66405	1.22636	0.000186385	up
LOC_Os09g23300	27.5916	8.05732	1.77586	6.92e-18	up
LOC_Os09g23620	4.57285	1.2352	1.88835	0.00204925	up
LOC_Os09g25090	72.5267	6.01902	3.59091	2.67e-52	up
LOC_Os09g25100	14.2643	5.09441	1.48542	3.05e-07	up
LOC_Os09g25690	12.3683	0.653488	4.24234	3.64e-22	up
LOC_Os09g25700	2.87488	0.550974	2.38344	1.52e-07	up
LOC_Os09g25770	9.62013	4.27906	1.16876	3.6e-10	up
LOC_Os09g26620	194.664	52.3859	1.89373	7e-16	up
LOC_Os09g26920	5.88467	1.60416	1.87514	6.13e-12	up
LOC_Os09g27260	5.79422	2.34533	1.30482	0.00241141	up
LOC_Os09g27330	4.14847	0.479355	3.11341	0.00352887	up
LOC_Os09g28280	22.0057	10.446	1.07492	7.82e-08	up
LOC_Os09g28440	5.37251	0.410478	3.71022	1.68e-11	up
LOC_Os09g28500	23.91	11.2211	1.0914	2.05e-06	up
LOC_Os09g28580	67.2837	28.2444	1.25229	6.01e-12	up
LOC_Os09g28600	104.695	30.3165	1.78801	2.37e-59	up
LOC_Os09g28840	1.10187	0.619402	0.831002	0.017107	up
LOC_Os09g30120	24.6498	10.2985	1.25914	8.96e-42	up
LOC_Os09g30160	65.9085	30.1524	1.12819	6.65e-12	up
LOC_Os09g30490	17.5193	2.03904	3.10299	2.57e-20	up
LOC_Os09g31130	8.21455	2.52581	1.70144	4.09e-17	up
LOC_Os09g31200	86.782	22.1657	1.96906	1.47e-06	up
LOC_Os09g31522	2.6992	1.06223	1.34543	0.034434	up
LOC_Os09g32470	30.234	8.59307	1.81493	1.47e-33	up
LOC_Os09g33530	24.026	9.34181	1.36282	0.000162223	up
LOC_Os09g34140	64.4717	30.4014	1.08453	2.38e-15	up
LOC_Os09g35010	19.8834	1.25039	3.99111	7.8e-29	up
LOC_Os09g35030	4.16977	0.796623	2.388	1.22e-06	up
LOC_Os09g36200	199.861	89.9631	1.15159	3.33e-08	up
LOC_Os09g36520	271.649	130.288	1.06004	6.79e-34	up
LOC_Os09g36790	8.51739	3.93243	1.11499	1.57e-05	up
LOC_Os09g38130	9.30627	4.1649	1.15992	1.2e-16	up
LOC_Os09g38310	29.1893	6.11854	2.25418	2.31e-38	up
LOC_Os09g38910	1.35682	0.669697	1.01865	0.00572633	up
LOC_Os09g39910	44.0617	17.5416	1.32874	9.27e-51	up
LOC_Os10g02840	2.10847	0.942215	1.16207	0.0037673	up
LOC_Os10g04370	9.92206	1.61285	2.62103	3.38e-12	up
LOC_Os10g09240	255.392	37.2514	2.77735	7.86e-42	up
LOC_Os10g12290	6.02689	2.86506	1.07285	3.34e-05	up
LOC_Os10g20470	19.3217	7.74244	1.31936	7.72e-11	up
LOC_Os10g21784	6.0112	1.38996	2.11261	4.73e-13	up
LOC_Os10g23240	0.687736	0.175858	1.96744	0.000187913	up
LOC_Os10g25030	118.964	42.0427	1.5006	6.01e-21	up
LOC_Os10g25230	5.18528	0.401321	3.69159	2.01e-11	up
LOC_Os10g25290	40.8824	11.4437	1.83692	2e-22	up
LOC_Os10g25400	12.9934	5.9938	1.11624	9.66e-05	up
LOC_Os10g28120	39.7341	14.1783	1.48669	6.55e-20	up
LOC_Os10g29570	86.4092	8.10812	3.41375	1.23e-45	up
LOC_Os10g31320	158.715	57.2804	1.47033	5.54e-37	up
LOC_Os10g31850	30.0133	11.2019	1.42186	4.9e-27	up
LOC_Os10g32680	52.4696	15.9915	1.71418	1.04e-43	up
LOC_Os10g32810	114.227	16.1391	2.82327	1.24e-185	up
LOC_Os10g33190	90.5887	16.915	2.42103	4.06e-47	up
LOC_Os10g33240	13.3398	3.29058	2.01932	3.75e-27	up
LOC_Os10g33250	0.777906	0.104981	2.88946	8.4e-15	up
LOC_Os10g33830	2.25313	0.817413	1.46279	0.005507	up
LOC_Os10g33990	46.0296	15.4027	1.57938	5.66e-09	up
LOC_Os10g34930	131.617	55.0223	1.25826	1.96e-09	up
LOC_Os10g35070	120.333	7.38466	4.02636	3.24e-42	up
LOC_Os10g35644	6.9751	2.85752	1.28745	1.1e-08	up
LOC_Os10g36180	35.858	0.661628	5.76013	8.83e-42	up
LOC_Os10g37110	37.3458	14.6188	1.35313	4.13e-20	up
LOC_Os10g37340	111.356	46.8816	1.24808	1.24e-43	up
LOC_Os10g38470	32.4823	3.83998	3.08048	9.24e-51	up
LOC_Os10g39870	15.7292	7.463	1.07562	5.8e-05	up
LOC_Os10g39920	15.2256	2.24586	2.76116	1.23e-24	up
LOC_Os10g40600	26.5877	12.05	1.14172	8.27e-08	up
LOC_Os10g41060	29.0412	13.0434	1.15478	1.24e-30	up
LOC_Os10g41480	2.79531	1.08544	1.36472	4.69e-05	up
LOC_Os10g41550	7.6636	2.77938	1.46326	9.13e-08	up
LOC_Os11g01530	177.005	42.5767	2.05566	4.84e-22	up
LOC_Os11g02300	26.6445	12.3524	1.10904	1.69e-21	up
LOC_Os11g02350	7275.77	3047.95	1.25526	2.52e-25	up
LOC_Os11g02570	10.6083	5.44485	0.962229	0.000107076	up
LOC_Os11g02610	19.0343	8.68572	1.13189	8.3e-06	up
LOC_Os11g02820	38.9573	17.1474	1.18391	7.21e-10	up
LOC_Os11g02840	11.8554	3.99656	1.56871	4.83e-09	up
LOC_Os11g03300	14.7233	2.54641	2.53156	1.83e-41	up
LOC_Os11g05410	3.3007	0.666589	2.3079	1.3e-06	up
LOC_Os11g05470	7.44642	0.391685	4.24878	3.1e-54	up
LOC_Os11g05494	6.64668	2.29326	1.53523	0.0386626	up
LOC_Os11g05640	1.51341	0.549478	1.46167	0.00330283	up
LOC_Os11g06990	2.77588	0.755022	1.87835	0.0030153	up
LOC_Os11g07830	12.8765	5.77965	1.15569	0.0349689	up
LOC_Os11g07911	101.704	0.6691	7.24793	5.3e-11	up
LOC_Os11g09680	27.642	13.153	1.07147	8.16e-20	up
LOC_Os11g09684	15.0942	5.05593	1.57795	4.64e-08	up
LOC_Os11g10470	45.1264	10.7573	2.06865	6.11e-05	up
LOC_Os11g12530	28.6754	9.15793	1.64672	1.5e-12	up
LOC_Os11g13670	112.827	38.7177	1.54305	4.4e-39	up
LOC_Os11g14140	201.577	86.1075	1.22712	6.7e-14	up
LOC_Os11g19864	1.55633	0.788737	0.980531	0.00487234	up
LOC_Os11g22449	4.44632	1.80681	1.29917	0.0157165	up
LOC_Os11g24070	8.26421	2.93249	1.49475	5.02e-07	up
LOC_Os11g25780	136.186	26.2129	2.37723	3.84e-15	up
LOC_Os11g26570	7.20885	0.242749	4.89223	2.75e-21	up
LOC_Os11g26760	38.5289	9.95966	1.95177	6.91e-32	up
LOC_Os11g26780	31.2751	0.779787	5.32579	2.92e-159	up
LOC_Os11g26790	105.659	2.18611	5.5949	0	up
LOC_Os11g27370	2.80959	0.641328	2.13122	0.000232135	up
LOC_Os11g29780	3.43067	0.380737	3.17162	4.23e-07	up
LOC_Os11g30500	72.3655	32.6893	1.14649	8.78e-09	up
LOC_Os11g31060	4.8418	1.04892	2.20664	0.0319812	up
LOC_Os11g31380	1.58951	0.0541711	4.87492	3.52e-12	up
LOC_Os11g32890	9.37711	0.331502	4.82205	7.15e-08	up
LOC_Os11g35240	2.29852	0.795001	1.53168	7.62e-05	up
LOC_Os11g37260	12.2896	5.48423	1.16408	5.52e-29	up
LOC_Os11g37950	37.7685	16.3816	1.2051	0.000416487	up
LOC_Os11g38860	0.694113	0.284436	1.28707	1.1e-09	up
LOC_Os11g38870	154.918	66.8428	1.21266	3.04e-37	up
LOC_Os11g41600	115.454	50.3964	1.19592	9.76e-17	up
LOC_Os11g42410	2.96429	0.243916	3.60323	1.65e-05	up
LOC_Os11g42510	26.0312	12.2633	1.0859	4.02e-18	up
LOC_Os11g43760	2.16119	0.222181	3.28202	3.13e-15	up
LOC_Os11g43790	11.087	0.318468	5.12158	4.76e-24	up
LOC_Os11g44810	1918.15	531.336	1.85202	2.63e-22	up
LOC_Os11g48060	8.99889	2.43868	1.88365	4.97e-28	up
LOC_Os12g01530	157.154	47.9185	1.71353	1.11e-18	up
LOC_Os12g02080	17.4053	5.0675	1.78018	1.29e-13	up
LOC_Os12g02200	2.09585	0.968661	1.11347	6.23e-06	up
LOC_Os12g02320	4414.74	1938.84	1.18714	2.43e-32	up
LOC_Os12g02800	41.8994	11.1056	1.91564	1.03e-24	up
LOC_Os12g03040	20.5679	2.47548	3.05462	7.17e-15	up
LOC_Os12g03720	16.5115	7.26129	1.18517	9.55e-30	up
LOC_Os12g03730	1.46537	0.582517	1.33089	1.01e-08	up
LOC_Os12g04980	1.06424	0.323039	1.72005	0.0017236	up
LOC_Os12g05210	18.6919	3.84241	2.28233	3.93e-16	up
LOC_Os12g05330	3.46126	0.382035	3.17952	0.00140036	up
LOC_Os12g06190	5.36879	2.98461	0.847056	0.000517919	up
LOC_Os12g07030	5.97776	2.49415	1.26106	0.00130196	up
LOC_Os12g07550	26.5372	11.6547	1.18711	6.47e-08	up
LOC_Os12g07640	6.27538	2.38704	1.39448	0.00106945	up
LOC_Os12g08260	52.736	23.8191	1.14667	3e-11	up
LOC_Os12g08700	8.00691	0.399891	4.32357	1.27e-07	up
LOC_Os12g12080	6.94466	1.96365	1.82237	0.0451516	up
LOC_Os12g12250	27.1795	12.26	1.14856	1.88e-13	up
LOC_Os12g12880	37.4587	16.8944	1.14876	2.25e-14	up
LOC_Os12g13910	192.18	15.085	3.67128	1.87e-262	up
LOC_Os12g15530	1.18348	0.463847	1.35131	0.0101485	up
LOC_Os12g17160	0.671549	0.215263	1.64139	0.0281682	up
LOC_Os12g17950	12.923	3.96471	1.70465	1.54e-06	up
LOC_Os12g22489	50.3073	23.0591	1.12543	3.27e-16	up
LOC_Os12g24020	14.6682	0.431124	5.08845	2.08e-80	up
LOC_Os12g25090	64.4252	19.1134	1.75304	1.49e-12	up
LOC_Os12g26290	5.23164	2.54231	1.04112	2.53e-12	up
LOC_Os12g27440	14.4427	6.33333	1.1893	3.09e-05	up
LOC_Os12g29220	88.445	28.098	1.65431	2.59e-71	up
LOC_Os12g29330	120.289	49.772	1.2731	1.06e-17	up
LOC_Os12g29400	29.965	4.61935	2.69751	9.81e-21	up
LOC_Os12g32610	25.5257	1.72574	3.88667	8.53e-32	up
LOC_Os12g33300	1.52187	0.757638	1.00627	0.0240354	up
LOC_Os12g34430	0.474622	0.0380727	3.63995	0.000508005	up
LOC_Os12g37690	4.41408	1.37838	1.67914	1.72e-07	up
LOC_Os12g37970	61.383	25.1487	1.28736	1.45e-08	up
LOC_Os12g38051	7.22417	2.66313	1.43971	7.56e-05	up
LOC_Os12g38100	56.8706	12.2199	2.21845	3.47e-21	up
LOC_Os12g39320	80.709	31.3404	1.36471	4.87e-49	up
LOC_Os12g39400	5.73814	2.21278	1.37473	8.79e-07	up
LOC_Os12g40260	18.6838	5.69826	1.7132	2.04e-11	up
LOC_Os12g42860	48.7059	23.6219	1.04397	5.28e-07	up
LOC_Os12g42910	9.80839	2.65521	1.88519	2.85e-08	up
LOC_Os12g43450	53.0086	25.2626	1.06922	3.56e-05	up
LOC_Os12g43490	4.52057	1.64359	1.45965	0.00851208	up
LOC_Os12g43720	3.60567	1.67342	1.10747	7.4e-09	up
LOC_Os01g01170	0.0442918	0.325778	-2.87878	0.0142146	down
LOC_Os01g01890	0.134921	1.29137	-3.25871	0.00029272	down
LOC_Os01g02060	6.48029	12.3874	-0.934742	0.0081635	down
LOC_Os01g02370	2.30283	7.01137	-1.60629	2.19e-21	down
LOC_Os01g02400	5.36683	12.7525	-1.24864	1.55e-15	down
LOC_Os01g02570	2.00296	4.67687	-1.22341	1.74e-06	down
LOC_Os01g02580	1.22502	3.31	-1.43402	1.45e-07	down
LOC_Os01g02600	4.44416	10.6059	-1.25489	2.42e-17	down
LOC_Os01g02740	0.0287066	0.116731	-2.02374	0.000933994	down
LOC_Os01g02750	0.725164	2.09367	-1.52965	1.8e-07	down
LOC_Os01g03940	15.3423	33.4023	-1.12243	9.88e-13	down
LOC_Os01g04170	0.264979	1.86626	-2.81621	0.02055	down
LOC_Os01g04230	2.88865	6.75655	-1.22589	5.15e-07	down
LOC_Os01g04390	4.39502	9.07009	-1.04525	0.00464907	down
LOC_Os01g04710	26.3596	56.7217	-1.10557	3.8e-06	down
LOC_Os01g05840	20.7828	51.892	-1.32012	5.64e-11	down
LOC_Os01g07360	0.820745	1.73677	-1.0814	0.000337285	down
LOC_Os01g07570	3.57146	7.42627	-1.05612	0.00202153	down
LOC_Os01g08020	1.01879	6.04979	-2.57003	2.55e-06	down
LOC_Os01g08150	0.0633262	0.922215	-3.86423	0.000907485	down
LOC_Os01g08220	1.74128	5.2796	-1.60028	3.21e-08	down
LOC_Os01g08260	6.45597	15.1345	-1.22913	0.000178876	down
LOC_Os01g08470	1.60831	4.40819	-1.45464	8.75e-07	down
LOC_Os01g09580	0.113188	1.83396	-4.01816	0.0100967	down
LOC_Os01g09830	37.2796	75.8229	-1.02425	7.91e-07	down
LOC_Os01g10110	0.172651	1.59957	-3.21175	1.36e-11	down
LOC_Os01g10180	3.53878	8.67579	-1.29374	0.0135402	down
LOC_Os01g10490	16.5708	60.9442	-1.87885	0.0120435	down
LOC_Os01g10850	2.93811	8.57214	-1.54476	1.01e-07	down
LOC_Os01g11010	1.22223	5.33478	-2.12591	3.9e-10	down
LOC_Os01g11210	0.342952	2.49598	-2.86353	6.57e-05	down
LOC_Os01g11340	2.26687	4.5114	-0.99287	0.00212979	down
LOC_Os01g11350	1.60739	7.75103	-2.26967	7.17e-08	down
LOC_Os01g11660	0.895142	2.00882	-1.16616	0.0214417	down
LOC_Os01g11810	4.73978	12.3428	-1.38078	5.53e-11	down
LOC_Os01g11860	1.97689	5.85818	-1.56722	6.64e-07	down
LOC_Os01g12260	0.790015	2.23501	-1.50033	1.14e-05	down
LOC_Os01g12650	24.4861	50.16	-1.03458	1.49e-19	down
LOC_Os01g13140	1.00351	4.82634	-2.26587	1.8e-09	down
LOC_Os01g13520	5.12123	11.5012	-1.16722	2.54e-23	down
LOC_Os01g13610	0.0899064	2.32655	-4.69363	0.00261495	down
LOC_Os01g14530	1.17327	2.9736	-1.34168	0.0424859	down
LOC_Os01g14850	33.4466	177.621	-2.40887	0.000351681	down
LOC_Os01g14960	0.709082	2.77528	-1.96861	0.0183365	down
LOC_Os01g15039	0.560986	2.04081	-1.86311	0.000105885	down
LOC_Os01g15970	4.00933	8.51382	-1.08645	9.52e-07	down
LOC_Os01g16450	3.38772	10.7283	-1.66303	2.66e-10	down
LOC_Os01g16650	0.397353	7.24375	-4.18824	0.00223071	down
LOC_Os01g17214	12.0671	30.7782	-1.35083	5.07e-35	down
LOC_Os01g17330	0.340736	1.82028	-2.41743	0.028223	down
LOC_Os01g19170	1.04871	3.25731	-1.63506	0.000485941	down
LOC_Os01g19220	2.40404	7.58287	-1.65728	9.75e-14	down
LOC_Os01g19480	5.54784	10.9514	-0.981123	4.46e-07	down
LOC_Os01g20160	0.265475	0.764664	-1.52625	0.024625	down
LOC_Os01g20780	3.33923	17.8292	-2.41665	4.11e-05	down
LOC_Os01g20830	14.3366	30.2398	-1.07675	1.89e-21	down
LOC_Os01g21034	14.4839	33.2028	-1.19686	2.14e-05	down
LOC_Os01g22910	3.23487	12.1564	-1.90994	2.79e-07	down
LOC_Os01g22980	4.66303	22.2252	-2.25286	9.62e-94	down
LOC_Os01g23970	0.44302	1.59011	-1.84368	7.88e-07	down
LOC_Os01g25484	90.8639	179.651	-0.983416	3.3e-24	down
LOC_Os01g25500	18.1857	38.8164	-1.09387	4.28e-05	down
LOC_Os01g25540	63.6259	182.565	-1.52073	3.11e-39	down
LOC_Os01g25560	10.1721	30.219	-1.57084	2.09e-07	down
LOC_Os01g25688	0.336497	0.483221	-0.522087	0.000856868	down
LOC_Os01g26270	1.27915	2.97594	-1.21816	1.15e-08	down
LOC_Os01g26300	0.190236	0.877449	-2.20553	0.0102547	down
LOC_Os01g27230	8.29075	21.7139	-1.38904	1.66e-15	down
LOC_Os01g27760	0.381725	1.07719	-1.49667	0.0101396	down
LOC_Os01g31800	4.40644	14.6502	-1.73323	0.0405931	down
LOC_Os01g32670	4.42386	87.0638	-4.2987	0.000359	down
LOC_Os01g32770	3.18626	8.79802	-1.46532	8.79e-09	down
LOC_Os01g33040	0.0900118	0.699019	-2.95715	0.00604644	down
LOC_Os01g33080	1.05647	2.56334	-1.27878	1.99e-08	down
LOC_Os01g33160	0.783891	6.85897	-3.12927	1.47e-15	down
LOC_Os01g33950	0.0497371	0.214506	-2.10863	0.0035407	down
LOC_Os01g34560	2.66385	8.63514	-1.69671	1.82e-08	down
LOC_Os01g34850	0.327616	0.711626	-1.11911	0.0436229	down
LOC_Os01g36390	0.201697	1.2716	-2.65638	3.05e-05	down
LOC_Os01g36580	0.620764	1.80138	-1.53698	5.51e-05	down
LOC_Os01g36660	1.55132	3.24624	-1.06527	0.00171381	down
LOC_Os01g36720	28.0477	114.503	-2.02944	9.1e-62	down
LOC_Os01g37910	196.878	428.362	-1.12153	3.43e-10	down
LOC_Os01g38359	11.5001	23.9823	-1.06032	1.18e-05	down
LOC_Os01g39330	2.21452	5.24787	-1.24474	0.00432603	down
LOC_Os01g39830	3.21129	8.05076	-1.32597	3.78e-05	down
LOC_Os01g40550	2.05452	4.38527	-1.09386	0.00171504	down
LOC_Os01g41200	2.93833	5.46037	-0.894	0.0183648	down
LOC_Os01g41240	117.174	379.29	-1.69464	2.7e-27	down
LOC_Os01g41990	0.871205	1.89428	-1.12056	0.0204356	down
LOC_Os01g42070	0.0576448	0.803483	-3.80101	0.00133073	down
LOC_Os01g42294	14.8213	30.6145	-1.04654	3.43e-13	down
LOC_Os01g42520	20.2612	40.6265	-1.0037	0.000549785	down
LOC_Os01g42900	1.62052	3.92654	-1.2768	0.00160894	down
LOC_Os01g42960	2.76452	6.00892	-1.12008	1.84e-05	down
LOC_Os01g43230	8.28436	22.3064	-1.42899	1.28e-16	down
LOC_Os01g43590	2.09558	5.06257	-1.27252	3.56e-05	down
LOC_Os01g43750	1.75111	4.88275	-1.47942	4.95e-06	down
LOC_Os01g44110	3.56311	15.3032	-2.10262	1.73e-07	down
LOC_Os01g44130	1.58422	4.76363	-1.58829	4.43e-18	down
LOC_Os01g44360	0.363096	1.15098	-1.66444	0.0064285	down
LOC_Os01g44390	41.4192	84.724	-1.03247	4.95e-06	down
LOC_Os01g45140	1.3513	7.75618	-2.521	2.53e-13	down
LOC_Os01g45274	610.783	1711.14	-1.48622	7.53e-43	down
LOC_Os01g45700	8.21993	51.3451	-2.64303	2.36e-32	down
LOC_Os01g45914	6.26413	122.849	-4.29363	7.28e-05	down
LOC_Os01g47510	0.29308	0.684197	-1.22312	0.00123329	down
LOC_Os01g47580	0.243951	0.830876	-1.76804	0.0234826	down
LOC_Os01g47635	0.332806	0.943792	-1.50379	0.00121488	down
LOC_Os01g47700	5.34353	26.9917	-2.33665	6.94e-05	down
LOC_Os01g47780	85.9972	245.058	-1.51076	1.17e-34	down
LOC_Os01g48570	0.247088	0.685047	-1.47118	0.0301582	down
LOC_Os01g48710	0.148132	1.42518	-3.2662	5.42e-06	down
LOC_Os01g49200	0.121421	1.26282	-3.37856	0.0143923	down
LOC_Os01g50820	1.46565	7.85608	-2.42226	5.75e-19	down
LOC_Os01g51260	0.287436	1.28543	-2.16094	0.000233329	down
LOC_Os01g51840	8.80598	18.4318	-1.06564	1.17e-06	down
LOC_Os01g51890	7.3806	15.6663	-1.08586	1.43e-23	down
LOC_Os01g52140	0.709516	1.4921	-1.07243	8.36e-05	down
LOC_Os01g52160	6.03403	22.4458	-1.89525	9.99e-22	down
LOC_Os01g52770	1.3024	14.1623	-3.44281	1.6e-20	down
LOC_Os01g52780	0.984348	3.24458	-1.72079	1.67e-10	down
LOC_Os01g53330	11.8065	26.2566	-1.1531	6.35e-16	down
LOC_Os01g53430	0.331798	1.17888	-1.82904	0.00247531	down
LOC_Os01g53640	1.6907	3.8555	-1.1893	0.000135159	down
LOC_Os01g53790	3.28489	6.73851	-1.03659	0.00363572	down
LOC_Os01g53840	1.61773	3.64129	-1.17048	0.000648871	down
LOC_Os01g55000	45.3234	108.243	-1.25594	6.11e-05	down
LOC_Os01g55150	2.30177	15.5102	-2.7524	7.14e-11	down
LOC_Os01g55160	1.34366	4.60028	-1.77556	0.0304728	down
LOC_Os01g55190	8.73091	21.6517	-1.31028	5.22e-06	down
LOC_Os01g55260	0.208811	0.892895	-2.09629	0.0332976	down
LOC_Os01g56870	0.309165	0.922361	-1.57695	7.92e-06	down
LOC_Os01g56940	0.22609	0.656343	-1.53755	2.03e-05	down
LOC_Os01g57540	0.261833	0.536265	-1.0343	0.0496402	down
LOC_Os01g57690	2.77177	8.62734	-1.63811	1.29e-05	down
LOC_Os01g57770	1.8577	3.75603	-1.01569	0.0177217	down
LOC_Os01g57880	3.67771	10.1532	-1.46505	0.000205909	down
LOC_Os01g58022	2.69729	6.85227	-1.34507	3.48e-06	down
LOC_Os01g58280	1.00279	2.58064	-1.36371	0.000369003	down
LOC_Os01g58550	14.2569	30.3895	-1.09191	4.28e-06	down
LOC_Os01g59120	0.281158	2.65702	-3.24036	0.00239024	down
LOC_Os01g59840	0.273144	0.624125	-1.19218	0.0449806	down
LOC_Os01g59870	4.28648	56.0649	-3.70923	1.19e-47	down
LOC_Os01g60330	2.10383	5.45424	-1.37436	2.05e-06	down
LOC_Os01g60340	0.439013	1.64475	-1.90553	7.68e-13	down
LOC_Os01g60770	18.8804	70.4057	-1.8988	7.61e-05	down
LOC_Os01g61570	0.809585	2.22615	-1.4593	0.00246097	down
LOC_Os01g61690	0.0980333	0.504029	-2.36216	0.00251133	down
LOC_Os01g61900	3.36564	7.56081	-1.16766	0.000123047	down
LOC_Os01g62990	0.148293	0.834606	-2.49265	0.00710599	down
LOC_Os01g63180	0.664216	3.67288	-2.46719	0.00447797	down
LOC_Os01g63540	1.1488	3.67406	-1.67725	3.84e-05	down
LOC_Os01g63580	16.6267	37.1485	-1.1598	4.62e-08	down
LOC_Os01g63770	12.575	26.8809	-1.09602	4.99e-21	down
LOC_Os01g64020	0.546537	1.07068	-0.970136	0.0154728	down
LOC_Os01g64100	2.29154	5.32529	-1.21654	5.34e-05	down
LOC_Os01g64110	1.26376	3.53967	-1.48589	5.21e-06	down
LOC_Os01g64640	12.0629	57.228	-2.24614	0.0323156	down
LOC_Os01g65030	1.9783	4.04668	-1.03248	1.18e-06	down
LOC_Os01g65880	25.5817	73.3412	-1.51951	3.53e-36	down
LOC_Os01g66110	6.33078	13.6209	-1.10537	8.4e-16	down
LOC_Os01g66510	1.21035	3.0426	-1.32988	3.37e-09	down
LOC_Os01g66700	0.168386	0.564897	-1.74621	0.00106433	down
LOC_Os01g66890	9.63184	21.4427	-1.15461	3.57e-21	down
LOC_Os01g67110	0.413162	14.8059	-5.16332	0.00204892	down
LOC_Os01g67360	2.11537	4.82889	-1.19078	2.54e-09	down
LOC_Os01g68140	0.595111	2.49106	-2.06553	2.22e-08	down
LOC_Os01g68589	2.70368	10.7512	-1.99151	0.000210075	down
LOC_Os01g68598	1.52471	3.23375	-1.08467	0.00628364	down
LOC_Os01g68730	0.156566	0.715824	-2.19283	0.0271725	down
LOC_Os01g68740	3.57973	8.20212	-1.19614	3.21e-05	down
LOC_Os01g68900	4.54853	9.64177	-1.0839	1.97e-05	down
LOC_Os01g69200	1.46644	3.02928	-1.04665	0.00129075	down
LOC_Os01g69290	2.44397	6.98308	-1.51464	2.3e-06	down
LOC_Os01g70560	0.146153	4.99305	-5.09437	0.00129443	down
LOC_Os01g70930	16.5359	43.031	-1.37977	4.88e-29	down
LOC_Os01g70970	0.0832382	1.25731	-3.91695	0.000761605	down
LOC_Os01g71170	18.0331	49.3547	-1.45254	6.04e-08	down
LOC_Os01g71280	6.68836	15.3535	-1.19884	1.73e-06	down
LOC_Os01g71310	4.30615	8.48336	-0.978237	1.3e-12	down
LOC_Os01g71320	3.08074	7.01573	-1.18732	0.000249468	down
LOC_Os01g71474	18.5963	37.3466	-1.00596	0.0427599	down
LOC_Os01g71810	2.38279	8.13934	-1.77226	4.1e-08	down
LOC_Os01g71820	0.994561	2.7165	-1.44962	0.00928016	down
LOC_Os01g72290	17.7635	67.3315	-1.92236	5.76e-07	down
LOC_Os01g72330	2.03002	20.6533	-3.34681	7.82e-85	down
LOC_Os01g72560	0.559393	1.34624	-1.267	0.00148184	down
LOC_Os01g72700	3.33054	11.4496	-1.78147	1.32e-06	down
LOC_Os01g72760	1.75368	3.67668	-1.06802	0.000271653	down
LOC_Os01g73980	14.2801	33.0142	-1.20908	1.72e-18	down
LOC_Os01g74146	0.154756	0.946361	-2.6124	0.0015852	down
LOC_Os01g74300	594.348	1659.29	-1.48119	8.79e-53	down
LOC_Os02g01140	0.707918	3.42657	-2.27511	7.71e-08	down
LOC_Os02g01210	32.0303	81.99	-1.35601	1.96e-21	down
LOC_Os02g02460	1.16047	2.91573	-1.32914	4.66e-05	down
LOC_Os02g02830	27.9854	74.4822	-1.41222	3.22e-30	down
LOC_Os02g03750	0.737583	1.49659	-1.0208	0.0427353	down
LOC_Os02g03790	3.60598	10.0831	-1.48348	8.41e-13	down
LOC_Os02g04170	0.461749	1.7654	-1.93481	2e-07	down
LOC_Os02g04540	0.351159	2.37122	-2.75543	2.79e-06	down
LOC_Os02g05040	0.105624	0.483415	-2.19432	0.000244208	down
LOC_Os02g05940	0.104211	0.309001	-1.5681	0.00324358	down
LOC_Os02g05970	0.0920312	0.261861	-1.5086	0.0130978	down
LOC_Os02g06140	0.0981606	0.429596	-2.12977	0.00339501	down
LOC_Os02g06150	0.618135	1.6745	-1.43773	0.00962158	down
LOC_Os02g06340	0.260496	0.891825	-1.7755	0.0476922	down
LOC_Os02g07110	11.1307	21.0667	-0.92042	2.57e-05	down
LOC_Os02g07190	1.28989	3.28295	-1.34774	1.79e-05	down
LOC_Os02g07370	0.0766365	0.26937	-1.81348	0.0310641	down
LOC_Os02g07380	0.384504	0.899038	-1.22539	8.55e-05	down
LOC_Os02g07870	2.97333	6.16477	-1.05197	3.28e-05	down
LOC_Os02g08220	0.828685	1.98057	-1.25702	0.00537894	down
LOC_Os02g09740	0.800023	2.77149	-1.79255	5.71e-05	down
LOC_Os02g10020	0.0447316	0.765152	-4.09638	0.000729409	down
LOC_Os02g10490	0.178977	0.638833	-1.83566	0.00216259	down
LOC_Os02g10520	1.00162	4.16396	-2.05561	9.77e-11	down
LOC_Os02g10760	4.10753	9.25075	-1.1713	0.00114121	down
LOC_Os02g11700	4.61486	10.329	-1.16234	0.000418306	down
LOC_Os02g12080	1.36171	4.31131	-1.6627	0.000628815	down
LOC_Os02g12480	121.981	262.643	-1.10644	4.79e-32	down
LOC_Os02g12730	5.26883	12.9692	-1.29953	0.0117905	down
LOC_Os02g13520	0.356219	1.19155	-1.742	0.000422273	down
LOC_Os02g13660	0.919023	32.2439	-5.13278	3.35e-06	down
LOC_Os02g14160	9.5883	38.3083	-1.99831	5.29e-29	down
LOC_Os02g14440	1.62902	4.02535	-1.30511	0.0494004	down
LOC_Os02g14910	1.189	5.62156	-2.24123	2.2e-10	down
LOC_Os02g15750	29.4027	60.0792	-1.03092	2.71e-18	down
LOC_Os02g15810	0.5055	7.92078	-3.96986	0.00180182	down
LOC_Os02g15820	0.9542	1.93886	-1.02284	0.0117661	down
LOC_Os02g16500	133.653	311.755	-1.22192	0.0270368	down
LOC_Os02g16940	0.0556244	0.646951	-3.53987	0.00252164	down
LOC_Os02g17680	2.9101	5.78631	-0.991573	1.16e-08	down
LOC_Os02g17780	0.410032	1.67601	-2.03122	1.97e-08	down
LOC_Os02g18410	4.43501	43.4387	-3.29197	9.53e-18	down
LOC_Os02g18450	17.8034	45.2522	-1.34583	2.27e-47	down
LOC_Os02g20040	14.077	27.274	-0.95418	2.43e-14	down
LOC_Os02g20540	17.5092	62.9237	-1.84549	0.0029391	down
LOC_Os02g21009	2.92535	14.8937	-2.34802	1.5e-59	down
LOC_Os02g21090	0.935457	2.02141	-1.11162	0.000473539	down
LOC_Os02g21340	11.8791	23.6832	-0.995445	6.65e-21	down
LOC_Os02g22570	0.0642655	0.167152	-1.37905	0.039266	down
LOC_Os02g24598	1.04932	2.44113	-1.2181	0.00990357	down
LOC_Os02g24700	1.09671	3.75381	-1.77518	0.000254735	down
LOC_Os02g26480	0.172944	0.640895	-1.88978	0.0191255	down
LOC_Os02g28074	2.20508	5.41202	-1.29534	2.12e-18	down
LOC_Os02g29640	0.133604	0.327483	-1.29345	0.0137358	down
LOC_Os02g30240	4.71321	12.7043	-1.43053	0.00535094	down
LOC_Os02g30800	0.203657	0.447076	-1.13438	0.000712773	down
LOC_Os02g32650	4.71252	11.3372	-1.2665	7.39e-10	down
LOC_Os02g34490	0.276182	0.871252	-1.65747	3.19e-06	down
LOC_Os02g35180	0.740333	12.82	-4.11408	4.15e-94	down
LOC_Os02g35230	0.0805621	0.420414	-2.38364	0.000773338	down
LOC_Os02g36110	0.473711	1.81445	-1.93745	0.00130329	down
LOC_Os02g36190	1.19572	3.36171	-1.49132	0.00227995	down
LOC_Os02g36264	1.00771	2.38361	-1.24206	3.05e-06	down
LOC_Os02g36500	1.313	5.61802	-2.09719	6.61e-05	down
LOC_Os02g36550	4.60982	12.5427	-1.44407	1.93e-15	down
LOC_Os02g36590	53.0774	116.404	-1.13297	6.26e-31	down
LOC_Os02g36890	3.41612	7.68611	-1.16989	0.00100146	down
LOC_Os02g38970	2.53805	4.82833	-0.927803	8.22e-07	down
LOC_Os02g39510	1.47574	11.8013	-2.99944	1.16e-15	down
LOC_Os02g40010	0.817265	5.14168	-2.65336	1.73e-13	down
LOC_Os02g40260	12.3782	33.4847	-1.43571	0.0408694	down
LOC_Os02g40410	0.718289	1.97201	-1.45703	0.00133014	down
LOC_Os02g40440	1.75397	9.77997	-2.4792	0.000774743	down
LOC_Os02g40664	0.706152	1.87156	-1.40619	0.000197213	down
LOC_Os02g41460	3.27753	7.31391	-1.15803	6.62e-05	down
LOC_Os02g41780	4.69967	10.05	-1.09657	4.68e-10	down
LOC_Os02g42380	1.76191	7.59831	-2.10854	9.9e-05	down
LOC_Os02g42430	0.474704	6.44203	-3.76242	1.13e-09	down
LOC_Os02g42560	0.183829	1.87549	-3.35084	0.00395401	down
LOC_Os02g42620	0.619038	1.91938	-1.63254	1e-05	down
LOC_Os02g42650	3.38851	8.37805	-1.30596	5.57e-06	down
LOC_Os02g42660	1.33356	3.92646	-1.55795	0.00127748	down
LOC_Os02g43280	20.3712	49.4102	-1.27828	0.00029269	down
LOC_Os02g43640	14.9988	54.7599	-1.86827	9.7e-09	down
LOC_Os02g43660	14.1998	33.0594	-1.21919	1.04e-07	down
LOC_Os02g44108	2.5037	12.4996	-2.31975	1.64e-19	down
LOC_Os02g44320	106.653	359.769	-1.75415	5.63e-05	down
LOC_Os02g44654	4.58478	13.6857	-1.57775	2.54e-11	down
LOC_Os02g44670	1.8583	5.89694	-1.66598	0.0068331	down
LOC_Os02g45010	0.279123	0.756455	-1.43835	0.01181	down
LOC_Os02g45170	3.8781	11.4939	-1.56745	9.86e-40	down
LOC_Os02g45620	1.89128	4.54095	-1.26363	0.00594931	down
LOC_Os02g45940	3.82231	41.7717	-3.45001	0.00217508	down
LOC_Os02g46680	3.97945	9.88387	-1.31251	3.7e-14	down
LOC_Os02g46910	4.63327	16.736	-1.85285	0.000233329	down
LOC_Os02g47130	0.288947	1.6512	-2.51464	0.00689016	down
LOC_Os02g47420	5.76176	11.942	-1.05146	0.00615973	down
LOC_Os02g47790	1.39395	3.84816	-1.46499	0.00414265	down
LOC_Os02g47920	0.110338	1.07787	-3.28819	0.00104737	down
LOC_Os02g48450	0.586423	2.37796	-2.01971	1.1e-09	down
LOC_Os02g49480	0.557376	1.57268	-1.4965	0.000321718	down
LOC_Os02g49555	0.198842	0.443072	-1.15592	0.0317826	down
LOC_Os02g49680	22.7113	46.4736	-1.033	8.96e-14	down
LOC_Os02g49950	1.41702	3.86538	-1.44775	2.44e-13	down
LOC_Os02g50000	2.61679	7.31825	-1.4837	1.46e-07	down
LOC_Os02g50040	2.0052	7.6822	-1.93777	2.95e-05	down
LOC_Os02g50330	1.48829	3.19802	-1.10352	0.000413013	down
LOC_Os02g50910	0.251856	1.30462	-2.37296	0.00459571	down
LOC_Os02g51060	1.88945	6.36367	-1.7519	1.65e-19	down
LOC_Os02g51620	2.05312	7.03855	-1.77746	2.16e-10	down
LOC_Os02g51680	0.650491	1.87834	-1.52986	0.000784542	down
LOC_Os02g51720	2.79931	6.72833	-1.26518	8.03e-08	down
LOC_Os02g51900	0.482163	1.92547	-1.99761	1.62e-08	down
LOC_Os02g51910	0.121608	0.639927	-2.39567	5.96e-05	down
LOC_Os02g52040	2.43938	12.9238	-2.40545	0.000969769	down
LOC_Os02g52930	0.504307	1.63377	-1.69583	0.00375873	down
LOC_Os02g52934	1.99301	3.48977	-0.808182	0.000267758	down
LOC_Os02g53000	1.10889	3.40018	-1.6165	2.79e-05	down
LOC_Os02g53130	3.54406	19.9731	-2.49458	1.82e-49	down
LOC_Os02g53200	11.965	24.4512	-1.03109	0.000486135	down
LOC_Os02g53360	0.793624	3.0458	-1.94029	0.00347024	down
LOC_Os02g53530	13.1449	37.1291	-1.49805	1.4e-20	down
LOC_Os02g53840	0.639836	2.59626	-2.02066	5.66e-07	down
LOC_Os02g54060	7.62854	18.6234	-1.28764	0.0125494	down
LOC_Os02g54190	0.180493	2.9784	-4.04452	2.73e-11	down
LOC_Os02g54280	0.648096	1.76344	-1.44411	0.0497504	down
LOC_Os02g55190	0.14882	1.20444	-3.01672	0.0206403	down
LOC_Os02g55410	0.245697	1.18834	-2.274	0.00356541	down
LOC_Os02g55870	1.86483	9.02119	-2.27427	1.88e-38	down
LOC_Os02g56490	0.294085	1.46474	-2.31634	0.0455521	down
LOC_Os02g56510	1.17774	2.4336	-1.04707	2.93e-07	down
LOC_Os02g56540	0.0676539	1.31688	-4.28281	0.00995783	down
LOC_Os02g56920	23.8554	56.924	-1.25473	0.00698663	down
LOC_Os02g57110	13.3877	89.9026	-2.74746	9.06e-96	down
LOC_Os02g57140	0.663981	1.88086	-1.50218	8.99e-05	down
LOC_Os02g58390	2.8727	6.03124	-1.07005	3.6e-05	down
LOC_Os02g58480	0.94789	2.65723	-1.48713	1.23e-08	down
LOC_Os02g58530	0.915766	2.77877	-1.6014	0.000189818	down
LOC_Os02g58720	12.1711	42.6108	-1.80776	0.000195394	down
LOC_Os02g58740	2.92025	5.97336	-1.03245	0.00917303	down
LOC_Os03g01300	26.6564	74.3825	-1.48048	0.000762178	down
LOC_Os03g01320	16.0498	59.825	-1.89819	1.71e-52	down
LOC_Os03g01530	9.46672	19.0686	-1.01026	0.0244816	down
LOC_Os03g01800	33.5486	70.2152	-1.06553	0.000308526	down
LOC_Os03g02040	41.7381	109.626	-1.39315	1.72e-18	down
LOC_Os03g02290	0.0980004	0.685295	-2.80587	0.0279343	down
LOC_Os03g02740	0.121577	0.58466	-2.26572	0.01229	down
LOC_Os03g02750	5.13823	13.7421	-1.41926	3.18e-17	down
LOC_Os03g02820	0.654161	1.64114	-1.32698	0.0096959	down
LOC_Os03g02920	13.1661	35.4701	-1.42978	1.55e-21	down
LOC_Os03g03350	2.1957	4.9206	-1.16415	0.000606588	down
LOC_Os03g03570	0.941047	2.22292	-1.24012	0.0040176	down
LOC_Os03g03630	0.437426	4.76353	-3.44492	0.000639872	down
LOC_Os03g04220	11.5464	40.8521	-1.82296	0.00317419	down
LOC_Os03g04250	0.665081	5.2788	-2.98861	0.00279965	down
LOC_Os03g04530	1.5792	7.10412	-2.16946	0.0378772	down
LOC_Os03g04550	0.411695	3.83977	-3.22137	0.000177093	down
LOC_Os03g04710	17.911	41.8959	-1.22596	4.03e-17	down
LOC_Os03g04720	0.205738	0.67987	-1.72445	1.68e-05	down
LOC_Os03g05250	0.445375	0.862939	-0.954236	0.045542	down
LOC_Os03g05270	5.0677	10.4141	-1.03914	2e-14	down
LOC_Os03g05520	12.8095	36.1561	-1.49702	0.00211424	down
LOC_Os03g05530	0.830242	7.97425	-3.26374	6.45e-31	down
LOC_Os03g06430	0.178099	1.4298	-3.00505	0.00129318	down
LOC_Os03g06570	5.34895	11.8308	-1.14522	2.08e-06	down
LOC_Os03g06670	2.54255	19.6836	-2.95265	0.000636449	down
LOC_Os03g06940	4.15651	11.9085	-1.51854	9.22e-07	down
LOC_Os03g07450	5.37144	16.9071	-1.65425	1.78e-14	down
LOC_Os03g07810	0.139477	2.40591	-4.10849	0.001131	down
LOC_Os03g08460	1.90883	4.81602	-1.33515	2.97e-05	down
LOC_Os03g08930	1.12683	3.83027	-1.76517	1.59e-05	down
LOC_Os03g09220	20.182	46.8721	-1.21566	2.59e-34	down
LOC_Os03g09940	4.958	10.1704	-1.03655	2.41e-12	down
LOC_Os03g10210	0.534188	1.58811	-1.57189	0.00986797	down
LOC_Os03g10260	0.556109	1.69779	-1.61022	0.0487023	down
LOC_Os03g10880	3.76376	14.673	-1.96292	3.13e-19	down
LOC_Os03g11210	6.00196	20.5273	-1.77404	6.66e-14	down
LOC_Os03g11400	0.0389133	0.994118	-4.67508	0.0032396	down
LOC_Os03g11540	0.297901	2.40228	-3.0115	0.00147543	down
LOC_Os03g11600	1.01774	2.25963	-1.15071	0.0468542	down
LOC_Os03g12140	0.24178	3.01085	-3.63841	2.13e-05	down
LOC_Os03g12290	5.88001	17.5615	-1.57853	0.00337462	down
LOC_Os03g12530	5.5655	11.8775	-1.09365	3.55e-19	down
LOC_Os03g12700	17.3354	34.7479	-1.0032	3.92e-08	down
LOC_Os03g13570	10.7853	26.8463	-1.31566	0.0183529	down
LOC_Os03g14130	15.2529	108.767	-2.83408	2.17e-19	down
LOC_Os03g14140	0.5602	4.47265	-2.99712	0.000988153	down
LOC_Os03g14654	2.05076	14.1603	-2.78762	7.14e-10	down
LOC_Os03g15050	14.199	38.0421	-1.4218	4.91e-33	down
LOC_Os03g15320	0.487052	2.15099	-2.14286	0.000113242	down
LOC_Os03g15370	0.900944	16.0484	-4.15484	0.0389533	down
LOC_Os03g15460	8.83042	22.6953	-1.36184	2.02e-12	down
LOC_Os03g15790	1.23076	5.1237	-2.05764	0.00673689	down
LOC_Os03g17100	71.6917	213.129	-1.57185	0.00717297	down
LOC_Os03g17760	1.17488	11.7142	-3.31767	0.00024157	down
LOC_Os03g17960	0.0848939	0.878386	-3.37112	0.000433736	down
LOC_Os03g18070	19.4367	49.3566	-1.34446	4.19e-21	down
LOC_Os03g18110	4.0344	9.2067	-1.19033	1.2e-05	down
LOC_Os03g18120	1.29998	4.78727	-1.88072	7.7e-05	down
LOC_Os03g18600	9.52465	34.8292	-1.87056	1.32e-26	down
LOC_Os03g18630	0.0506373	0.632794	-3.64346	0.0127991	down
LOC_Os03g18640	0.245072	0.93609	-1.93344	0.0222576	down
LOC_Os03g18960	0.409999	1.50891	-1.87981	5.29e-05	down
LOC_Os03g19080	0.34554	1.16844	-1.75765	0.0401218	down
LOC_Os03g19200	1.58514	4.05329	-1.35448	0.0016121	down
LOC_Os03g19220	7.31534	17.1268	-1.22726	1.63e-07	down
LOC_Os03g19420	0.524334	5.69309	-3.44065	7.23e-06	down
LOC_Os03g19427	1.11513	12.2468	-3.45711	0.000129378	down
LOC_Os03g19600	0.054277	0.706559	-3.7024	0.000420543	down
LOC_Os03g20330	24.4963	129.47	-2.40199	0.00136425	down
LOC_Os03g20440	2.5131	5.24602	-1.06175	0.0148255	down
LOC_Os03g20450	0.831558	4.57431	-2.45966	3.5e-13	down
LOC_Os03g20760	19.8121	49.8296	-1.33062	1.75e-07	down
LOC_Os03g21400	1.21229	4.73682	-1.96618	6.52e-11	down
LOC_Os03g21710	2.13624	7.89715	-1.88626	0.0265549	down
LOC_Os03g21730	0.975653	3.3365	-1.7739	3.36e-05	down
LOC_Os03g21820	1.17892	2.99328	-1.34426	0.0138501	down
LOC_Os03g22020	0.845441	2.90981	-1.78315	0.00160564	down
LOC_Os03g22040	1.11219	2.46008	-1.14531	0.000763271	down
LOC_Os03g22210	9.40279	36.1586	-1.94318	1.21e-17	down
LOC_Os03g22230	1.20049	13.9497	-3.53854	9.23e-23	down
LOC_Os03g24760	6.3123	11.1202	-0.816948	1.03e-08	down
LOC_Os03g24930	67.3997	149.383	-1.1482	6.99e-07	down
LOC_Os03g24940	3.00773	8.18348	-1.44404	6.87e-23	down
LOC_Os03g27120	75.0637	205.483	-1.45283	1.98e-16	down
LOC_Os03g27370	0.641245	1.52227	-1.24728	0.00115376	down
LOC_Os03g27480	0.543843	2.30116	-2.0811	5.05e-07	down
LOC_Os03g28330	74.1551	220.298	-1.57084	2.47e-08	down
LOC_Os03g32460	0.0523349	0.136226	-1.38015	0.0356158	down
LOC_Os03g37810	4.5585	10.5224	-1.20684	0.0114297	down
LOC_Os03g37960	1.05972	2.60172	-1.29579	4.79e-07	down
LOC_Os03g38170	1.06911	2.30081	-1.10574	0.00859367	down
LOC_Os03g38250	0.12634	0.296284	-1.22967	0.00803516	down
LOC_Os03g38470	0.137382	1.69522	-3.62521	1.84e-06	down
LOC_Os03g38640	2.42515	6.444	-1.40988	1.43e-05	down
LOC_Os03g39020	0.168058	1.56684	-3.22082	0.0133323	down
LOC_Os03g39650	1.71438	3.48886	-1.02507	0.00275956	down
LOC_Os03g40100	4.49958	9.94657	-1.14441	1.04e-15	down
LOC_Os03g41480	0.272625	1.46502	-2.42593	4.05e-09	down
LOC_Os03g42630	2.11979	4.33722	-1.03285	0.00453299	down
LOC_Os03g43440	24.4964	52.8874	-1.11035	1.86e-08	down
LOC_Os03g43670	2.21489	5.80901	-1.39106	1.79e-07	down
LOC_Os03g44880	0.708665	3.8542	-2.44325	3.26e-06	down
LOC_Os03g45619	42.5931	120.425	-1.49945	0.000383858	down
LOC_Os03g45760	0.375965	1.50318	-1.99934	0.0274811	down
LOC_Os03g46150	7.51742	24.3151	-1.69355	9.45e-10	down
LOC_Os03g46260	4.64337	11.9144	-1.35946	4e-12	down
LOC_Os03g46920	0.0562788	1.52904	-4.76389	0.00767283	down
LOC_Os03g47010	1.44524	5.78903	-2.00201	5.25e-06	down
LOC_Os03g47190	0.168544	0.752026	-2.15766	0.00360653	down
LOC_Os03g47230	1.7383	3.92159	-1.17376	0.00054663	down
LOC_Os03g47620	0.191477	0.511058	-1.41632	0.0186796	down
LOC_Os03g47730	0	1.57838	#NUM!	1.61e-10	down
LOC_Os03g49050	0.153256	1.21571	-2.98778	0.00245312	down
LOC_Os03g49610	1.77914	7.04105	-1.98462	0.00107461	down
LOC_Os03g49830	5.45889	12.4966	-1.19486	1.68e-08	down
LOC_Os03g50420	0.0211132	0.532718	-4.65715	0.00108339	down
LOC_Os03g50970	2.55154	8.08082	-1.66313	1.14e-14	down
LOC_Os03g51530	0.375679	2.62815	-2.80648	0.0341171	down
LOC_Os03g51910	0.971721	2.1422	-1.14048	7.58e-06	down
LOC_Os03g52070	4.46241	10.3805	-1.21797	2.99e-19	down
LOC_Os03g52460	17.7676	36.744	-1.04826	9.14e-28	down
LOC_Os03g52650	0.488706	5.31523	-3.4431	0.0383196	down
LOC_Os03g53800	36.9714	79.7986	-1.10995	1.96e-12	down
LOC_Os03g54000	6.00697	31.1639	-2.37516	1.47e-78	down
LOC_Os03g54910	3.86709	8.19794	-1.08401	0.0292291	down
LOC_Os03g55290	24.0068	107.377	-2.16117	2.47e-33	down
LOC_Os03g55350	10.301	22.0556	-1.09836	0.000608341	down
LOC_Os03g55830	1.05469	2.75758	-1.38659	1.35e-07	down
LOC_Os03g56070	0.0904869	1.14192	-3.65761	0.0234804	down
LOC_Os03g56820	4.47269	9.77378	-1.12777	0.0419363	down
LOC_Os03g56944	11.0785	28.4201	-1.35915	0.000222471	down
LOC_Os03g56950	3.86498	14.0388	-1.86089	1.01e-33	down
LOC_Os03g57080	4.59166	12.5491	-1.45049	5.43e-07	down
LOC_Os03g57780	2.38792	6.72652	-1.49411	5.48e-06	down
LOC_Os03g57950	0.226449	0.851113	-1.91017	1.59e-07	down
LOC_Os03g58220	0.549392	2.52736	-2.20172	3.37e-06	down
LOC_Os03g58230	74.5406	172.927	-1.21406	4.96e-32	down
LOC_Os03g58350	2.69118	8.11386	-1.59215	0.000139237	down
LOC_Os03g60300	0.24497	1.5255	-2.6386	0.000345323	down
LOC_Os03g60850	12.3788	27.6351	-1.15862	2.87e-15	down
LOC_Os03g61670	3.2398	7.19242	-1.15057	0.00288347	down
LOC_Os03g61740	6.03515	26.4674	-2.13276	9.35e-31	down
LOC_Os03g62090	12.0058	27.9587	-1.21957	2.26e-11	down
LOC_Os03g62314	0.322286	1.28651	-1.99705	0.0017316	down
LOC_Os03g62670	9.75823	107.474	-3.46122	1.36e-37	down
LOC_Os03g62740	4.43279	15.4242	-1.79891	1.47e-27	down
LOC_Os03g63970	5.67183	13.0683	-1.20418	7.62e-12	down
LOC_Os03g64170	6.86614	26.2952	-1.93723	2.14e-46	down
LOC_Os03g64340	0.373184	1.53298	-2.03838	3.95e-06	down
LOC_Os04g01470	0.180513	0.780844	-2.11293	0.0227228	down
LOC_Os04g01500	7.7426	23.811	-1.62074	8.92e-07	down
LOC_Os04g02050	31.0038	68.7564	-1.14905	2.24e-14	down
LOC_Os04g02520	0.134426	0.551496	-2.03654	0.000483096	down
LOC_Os04g02580	1.3274	5.56714	-2.06833	0.000103775	down
LOC_Os04g02880	6.98015	26.3647	-1.91728	6.57e-10	down
LOC_Os04g03050	0.406085	1.4827	-1.86838	8.41e-09	down
LOC_Os04g05050	16.4321	37.5882	-1.19377	0.000221212	down
LOC_Os04g05700	0.291874	0.68325	-1.22707	0.00226346	down
LOC_Os04g06900	0.372464	0.975184	-1.38858	0.00161059	down
LOC_Os04g07110	1.48182	2.92551	-0.981315	0.00499836	down
LOC_Os04g07150	0.063486	0.181064	-1.51199	0.0428643	down
LOC_Os04g07920	0.54954	1.08079	-0.975791	0.0373308	down
LOC_Os04g08350	15.483	32.8672	-1.08596	2.84e-25	down
LOC_Os04g08390	0.256113	0.573561	-1.16316	0.000205909	down
LOC_Os04g09900	0.484862	1.51314	-1.6419	0.000408073	down
LOC_Os04g10010	2.21949	5.15887	-1.21683	0.000954078	down
LOC_Os04g10160	0.730031	2.25798	-1.629	0.00114059	down
LOC_Os04g12060	4.20679	8.46722	-1.00917	3.54e-15	down
LOC_Os04g12070	0.409364	0.9072	-1.14804	0.00048792	down
LOC_Os04g12460	0.260642	0.625548	-1.26305	8.86e-05	down
LOC_Os04g13590	0.360259	0.745274	-1.04874	0.0466425	down
LOC_Os04g15800	0.260423	1.1801	-2.17999	0.0295542	down
LOC_Os04g16740	3.55928	7.58331	-1.09124	1.97e-12	down
LOC_Os04g17650	0.158982	0.487028	-1.61514	0.00126528	down
LOC_Os04g20680	0.235438	0.586825	-1.31758	0.00728155	down
LOC_Os04g22910	0.113286	0.381988	-1.75356	5.63e-05	down
LOC_Os04g24430	1.18707	4.86485	-2.03498	9.64e-09	down
LOC_Os04g24620	0.150733	0.446097	-1.56537	0.00338893	down
LOC_Os04g27020	1.45625	3.35368	-1.20348	8.56e-06	down
LOC_Os04g27540	0.233116	0.516858	-1.14872	0.0377856	down
LOC_Os04g28260	0.344005	0.824406	-1.26092	0.0373477	down
LOC_Os04g28520	3.99028	17.5661	-2.13823	1.19e-05	down
LOC_Os04g28780	0.381444	0.792735	-1.05536	0.00589154	down
LOC_Os04g29680	2.69333	11.5618	-2.1019	5.72e-18	down
LOC_Os04g30030	2.28581	5.49878	-1.26641	4.48e-05	down
LOC_Os04g30040	3.7447	14.0947	-1.91222	2.09e-56	down
LOC_Os04g30720	0.109341	0.543678	-2.31392	0.000531287	down
LOC_Os04g31350	4.59187	11.8991	-1.3737	8.2e-11	down
LOC_Os04g31410	34.4463	85.2737	-1.30775	3.56e-08	down
LOC_Os04g31484	4.19835	22.881	-2.44625	1.61e-05	down
LOC_Os04g31520	49.7114	108.903	-1.1314	4.27e-08	down
LOC_Os04g32030	13.2161	27.7023	-1.0677	1.36e-06	down
LOC_Os04g32540	2.677	6.01034	-1.16683	0.0309825	down
LOC_Os04g32800	34.0136	95.7547	-1.49323	1.75e-17	down
LOC_Os04g32920	6.9723	15.9818	-1.19672	7.72e-12	down
LOC_Os04g33740	0.0591665	2.24446	-5.24544	1.25e-14	down
LOC_Os04g34170	15.3787	37.7235	-1.29452	0.00104876	down
LOC_Os04g34230	0.527722	1.64657	-1.64162	0.000207473	down
LOC_Os04g34240	0.200255	3.89455	-4.28155	0.00111674	down
LOC_Os04g35210	2.79894	2.88236	-0.0423724	9.47e-08	down
LOC_Os04g36070	1.50038	7.66219	-2.35243	1.43e-29	down
LOC_Os04g37480	3.39807	11.836	-1.8004	2.32e-14	down
LOC_Os04g37770	2.36144	35.0735	-3.89265	5.28e-05	down
LOC_Os04g37990	1.24346	2.2545	-0.858453	0.000260888	down
LOC_Os04g38530	0.61312	1.30017	-1.08446	0.0230369	down
LOC_Os04g38600	147.607	341.078	-1.20834	3.65e-14	down
LOC_Os04g38810	0.939435	2.33519	-1.31367	0.0148624	down
LOC_Os04g39110	21.7023	63.0731	-1.53918	0.0178612	down
LOC_Os04g39150	294.435	648.3	-1.13871	6.33e-08	down
LOC_Os04g39320	12.7995	39.1099	-1.61144	0.00824386	down
LOC_Os04g39380	0.845504	5.0128	-2.56773	1.55e-05	down
LOC_Os04g39610	1.34477	5.86032	-2.12362	1.52e-08	down
LOC_Os04g39670	0.107035	0.891513	-3.05818	0.0195582	down
LOC_Os04g40410	16.6451	69.4938	-2.06179	4.41e-20	down
LOC_Os04g40510	1.99268	4.71548	-1.24269	6.29e-08	down
LOC_Os04g40630	114.246	248.866	-1.12323	2.89e-39	down
LOC_Os04g41350	1.15591	4.12285	-1.83461	6.3e-05	down
LOC_Os04g41810	13.8993	27.0021	-0.958056	0.000670656	down
LOC_Os04g41900	0.674098	15.3268	-4.50696	0.00114059	down
LOC_Os04g42520	6.87785	15.7913	-1.1991	6.01e-15	down
LOC_Os04g42540	0	4.08655	#NUM!	8.75e-05	down
LOC_Os04g42720	0.507732	2.11068	-2.05557	4.87e-05	down
LOC_Os04g42860	3.39894	9.09175	-1.41947	0.0463016	down
LOC_Os04g43230	0.191188	0.886792	-2.2136	3.35e-05	down
LOC_Os04g44210	2.84723	6.6238	-1.2181	9.84e-13	down
LOC_Os04g44354	1.61528	3.61351	-1.16162	0.000218022	down
LOC_Os04g45000	8.13004	26.0265	-1.67865	1.11e-28	down
LOC_Os04g45340	0.181226	1.07948	-2.57447	0.000454015	down
LOC_Os04g45690	3.69278	10.7646	-1.54352	3.66e-11	down
LOC_Os04g45720	2.28254	5.86733	-1.36206	0.00216434	down
LOC_Os04g46110	25.1406	62.0932	-1.30442	0.000239511	down
LOC_Os04g46130	28.0905	60.4704	-1.10615	0.000132116	down
LOC_Os04g46560	2.0612	6.08038	-1.56068	2.51e-09	down
LOC_Os04g46730	11.1058	28.8437	-1.37694	0.00385656	down
LOC_Os04g46830	14.7598	59.8078	-2.01866	4.29e-17	down
LOC_Os04g46990	1.70294	4.91801	-1.53005	0.000469052	down
LOC_Os04g47300	2.70033	5.27147	-0.965066	6.06e-07	down
LOC_Os04g47420	4.44794	19.7413	-2.15001	1.11e-30	down
LOC_Os04g47810	0.0936477	0.446288	-2.25266	0.0444944	down
LOC_Os04g48416	6.2434	18.4004	-1.55933	1.01e-11	down
LOC_Os04g48760	0.107632	0.681463	-2.66253	0.02064	down
LOC_Os04g48930	0.3426	3.97242	-3.53542	1.73e-20	down
LOC_Os04g49130	0.842427	1.82253	-1.11332	0.0305568	down
LOC_Os04g49210	2.54924	13.6484	-2.42059	1.18e-07	down
LOC_Os04g49420	6.46214	19.8161	-1.61659	0.0281949	down
LOC_Os04g49560	1.43835	4.30605	-1.58195	1.35e-05	down
LOC_Os04g49950	0.242241	0.692155	-1.51466	0.00700171	down
LOC_Os04g50960	0.112058	1.28503	-3.51949	0.015957	down
LOC_Os04g51040	1.36164	3.14861	-1.20938	5.97e-06	down
LOC_Os04g51340	1.21342	6.18299	-2.34922	3.96e-07	down
LOC_Os04g51460	1.18249	3.68859	-1.64124	9.36e-05	down
LOC_Os04g51980	1.75277	8.42008	-2.26419	2.55e-11	down
LOC_Os04g52250	2.26073	13.3849	-2.56574	1.05e-05	down
LOC_Os04g52260	72.8023	175.753	-1.27149	1.28e-12	down
LOC_Os04g52310	0.386298	3.65065	-3.24036	2.93e-21	down
LOC_Os04g52320	6.73005	13.8439	-1.04056	2.74e-10	down
LOC_Os04g52780	0.218263	0.644157	-1.56134	0.0102524	down
LOC_Os04g52820	7.95817	21.043	-1.40283	2.08e-10	down
LOC_Os04g53180	48.9121	110.097	-1.17052	1.91e-12	down
LOC_Os04g53730	1.9427	4.71296	-1.27857	0.0183953	down
LOC_Os04g53860	1.07173	2.34543	-1.12991	0.00813436	down
LOC_Os04g53950	4.20998	20.87	-2.30955	0.0103331	down
LOC_Os04g54240	1.40455	9.70661	-2.78885	2.54e-17	down
LOC_Os04g54520	0.0253647	0.264912	-3.38462	0.0198442	down
LOC_Os04g54620	58.7803	72.8999	-0.310583	1.41e-05	down
LOC_Os04g54810	7.91649	29.8208	-1.91339	6.25e-07	down
LOC_Os04g54930	3.34306	9.57648	-1.51832	2.9e-33	down
LOC_Os04g54940	1.68258	3.81326	-1.18035	1.76e-06	down
LOC_Os04g55159	32.118	133.919	-2.0599	0.00420583	down
LOC_Os04g56180	0.988892	5.40758	-2.4511	1.45e-08	down
LOC_Os04g56230	16.261	35.4038	-1.12249	5.57e-28	down
LOC_Os04g56390	5.34252	10.1153	-0.92094	0.00159649	down
LOC_Os04g56470	0.235822	1.02248	-2.11631	0.0104295	down
LOC_Os04g56680	1.52273	5.97651	-1.97264	8.58e-05	down
LOC_Os04g57650	2.06433	4.46865	-1.11417	0.0101639	down
LOC_Os04g57720	1.51605	4.28017	-1.49735	1.63e-06	down
LOC_Os04g58720	0.63082	1.36555	-1.11418	0.0183133	down
LOC_Os04g58860	28.3977	61.5362	-1.11566	3.49e-11	down
LOC_Os04g59120	0.663638	1.82291	-1.45778	0.0190905	down
LOC_Os04g59200	0.629392	1.61781	-1.36201	0.0466425	down
LOC_Os04g59310	0.692742	2.47013	-1.8342	0.000288024	down
LOC_Os04g59320	1.7111	3.68552	-1.10694	0.00314705	down
LOC_Os04g59330	51.6722	98.8131	-0.935312	1.22e-24	down
LOC_Os04g59370	0.788621	1.81384	-1.20164	0.0489639	down
LOC_Os04g59380	1.77561	3.61027	-1.02379	0.000243324	down
LOC_Os05g01140	3.28748	9.55933	-1.53993	5.33e-17	down
LOC_Os05g01730	2.5734	7.81334	-1.60226	2.23e-12	down
LOC_Os05g01810	21.2664	58.4309	-1.45816	1.72e-37	down
LOC_Os05g02150	1.37822	3.03802	-1.14033	0.00752926	down
LOC_Os05g02250	58.2005	117.12	-1.00889	2.3e-27	down
LOC_Os05g02300	3.59713	29.9085	-3.05564	0.00314088	down
LOC_Os05g02900	2.45159	6.39174	-1.38249	0.000647107	down
LOC_Os05g03972	0.523602	3.99364	-2.93116	7.61e-06	down
LOC_Os05g04020	2.4268	9.58401	-1.98157	3.86e-14	down
LOC_Os05g04170	46.152	99.6566	-1.11057	1.15e-08	down
LOC_Os05g04600	4.96327	10.5309	-1.08527	9.09e-22	down
LOC_Os05g04820	2.94372	8.46467	-1.52381	4.1e-09	down
LOC_Os05g05670	3.90285	7.43022	-0.928874	0.000673085	down
LOC_Os05g05680	43.6765	109.517	-1.32623	7.24e-08	down
LOC_Os05g07764	1.38693	4.30474	-1.63403	4.51e-08	down
LOC_Os05g07820	0.152376	0.856247	-2.49039	3.17e-05	down
LOC_Os05g08480	1.84798	4.62043	-1.32207	0.000304777	down
LOC_Os05g09704	43.5583	120.395	-1.46675	4.52e-13	down
LOC_Os05g09724	2.00496	7.96531	-1.99016	9.93e-06	down
LOC_Os05g09740	124.98	276.444	-1.1453	8.77e-14	down
LOC_Os05g10210	42.7233	106.716	-1.32068	0.00339059	down
LOC_Os05g10330	4.03677	17.768	-2.13801	2.29e-06	down
LOC_Os05g10370	2.98362	7.32796	-1.29635	3.02e-05	down
LOC_Os05g10830	3.9536	8.52033	-1.10774	0.0245433	down
LOC_Os05g11210	1.97366	18.9053	-3.25985	2.38e-19	down
LOC_Os05g11300	2.66935	5.1337	-0.94351	0.00216259	down
LOC_Os05g11910	19.0071	42.1137	-1.14776	7.48e-14	down
LOC_Os05g11980	0.0424432	0.175216	-2.04553	0.000673212	down
LOC_Os05g11990	8.28213	16.7983	-1.02024	0.0070257	down
LOC_Os05g13900	1.76175	4.87867	-1.46948	1.77e-10	down
LOC_Os05g13940	31.2991	105.899	-1.75849	6.97e-05	down
LOC_Os05g15850	3.3632	11.1904	-1.73435	0.000491586	down
LOC_Os05g17604	0.301676	0.651214	-1.11013	0.0146077	down
LOC_Os05g19670	2.80392	7.29958	-1.38037	0.0030327	down
LOC_Os05g19910	2.85419	12.3579	-2.11428	0.00159895	down
LOC_Os05g25350	4.66962	12.102	-1.37386	2.84e-27	down
LOC_Os05g28780	2.56935	7.03959	-1.45409	0.000895837	down
LOC_Os05g29010	0.284172	0.653087	-1.20051	0.0143857	down
LOC_Os05g30010	3.94466	9.91047	-1.32905	0.0069007	down
LOC_Os05g30500	9.40977	18.6744	-0.988829	0.0346398	down
LOC_Os05g30750	2.92365	6.53812	-1.1611	0.00277744	down
LOC_Os05g30820	1.22425	4.12741	-1.75333	2.58e-14	down
LOC_Os05g31610	0.0495999	0.138794	-1.48453	0.0459153	down
LOC_Os05g32440	1.86489	3.89474	-1.06244	0.00617418	down
LOC_Os05g32760	1.09581	2.90528	-1.40668	2e-09	down
LOC_Os05g32860	7.55912	20.8425	-1.46324	0.0417376	down
LOC_Os05g33080	3.96929	8.226	-1.05131	0.00116159	down
LOC_Os05g33570	27.544	58.1935	-1.07912	6.65e-09	down
LOC_Os05g33690	5.65981	15.1674	-1.42215	0.00028059	down
LOC_Os05g33890	0.410863	1.02492	-1.31878	0.0388194	down
LOC_Os05g34010	3.80942	7.57759	-0.992168	4.32e-06	down
LOC_Os05g34170	13.478	29.9972	-1.15423	1.58e-16	down
LOC_Os05g34320	1.97437	6.49549	-1.71805	3.58e-07	down
LOC_Os05g34854	1.9193	4.77126	-1.31379	0.000521026	down
LOC_Os05g35380	0.790166	2.02053	-1.35451	0.0147264	down
LOC_Os05g35480	0.729287	2.33185	-1.67692	2.28e-05	down
LOC_Os05g35930	7.72349	21.4222	-1.47178	1.33e-08	down
LOC_Os05g36280	4.84139	52.3937	-3.4359	0.00548764	down
LOC_Os05g37000	0.273352	1.38127	-2.33717	2.29e-05	down
LOC_Os05g37470	4.18073	9.73077	-1.2188	4.88e-09	down
LOC_Os05g38000	11.2276	26.4478	-1.2361	4.02e-06	down
LOC_Os05g38390	0.109377	1.57023	-3.84359	9.57e-08	down
LOC_Os05g38480	0.498864	1.6821	-1.75355	0.0223411	down
LOC_Os05g39850	0.200809	1.42084	-2.82285	0.00597729	down
LOC_Os05g39990	3.01053	12.7067	-2.0775	1.31e-12	down
LOC_Os05g40200	3.04248	7.57013	-1.31507	6.86e-15	down
LOC_Os05g40960	0.662438	5.13344	-2.95407	3.81e-26	down
LOC_Os05g41390	0.115943	2.06318	-4.15338	0.0139687	down
LOC_Os05g41990	4.34051	24.6322	-2.50461	9.75e-40	down
LOC_Os05g42120	4.89393	12.4792	-1.35046	1.02e-07	down
LOC_Os05g42180	1.51375	3.76261	-1.31361	1.06e-07	down
LOC_Os05g43140	0.17706	4.75436	-4.74694	0.000106303	down
LOC_Os05g43610	0.105642	0.317694	-1.58845	0.00905354	down
LOC_Os05g43820	1.6248	6.07211	-1.90193	6.46e-12	down
LOC_Os05g43870	1.52706	4.14333	-1.44004	0.00141953	down
LOC_Os05g43940	0.536743	1.55711	-1.53657	0.0318667	down
LOC_Os05g44070	7.46985	15.3358	-1.03775	0.000372038	down
LOC_Os05g44200	1.79068	29.4552	-4.03994	2.31e-32	down
LOC_Os05g44210	3.89504	9.05716	-1.21742	1.15e-10	down
LOC_Os05g44600	1.05831	4.67385	-2.14284	0.000869751	down
LOC_Os05g46550	3.55545	7.67389	-1.10993	0.000713724	down
LOC_Os05g47540	11.7411	59.635	-2.34459	1.16e-38	down
LOC_Os05g49040	0.225041	0.783118	-1.79904	0.00417935	down
LOC_Os05g49240	4.66155	146.308	-4.97205	3.17e-20	down
LOC_Os05g50340	47.1776	285.432	-2.59697	7.79e-23	down
LOC_Os05g50350	0.141739	3.42062	-4.59295	7.48e-06	down
LOC_Os05g50680	4.77028	10.1504	-1.08938	0.00173421	down
LOC_Os05g50750	2.46843	6.69302	-1.43906	1.39e-26	down
LOC_Os05g50910	1.38687	4.60505	-1.73138	6.51e-07	down
LOC_Os05g50960	3.25129	6.71515	-1.04641	2.6e-05	down
LOC_Os05g51160	5.28439	12.61	-1.25476	3.7e-09	down
LOC_Os05g51220	3.37367	6.61318	-0.971023	0.00548315	down
LOC_Os06g01490	0.54189	1.61308	-1.57374	0.000803295	down
LOC_Os06g01620	2.63441	8.76525	-1.73432	5.45e-07	down
LOC_Os06g01966	2.0962	5.14864	-1.29641	6.73e-10	down
LOC_Os06g01972	0.172755	2.23403	-3.69285	6.88e-17	down
LOC_Os06g02019	1.21653	2.80195	-1.20366	7.44e-05	down
LOC_Os06g02780	21.5913	51.2352	-1.24668	7.73e-11	down
LOC_Os06g02900	3.96451	18.2252	-2.20072	3.11e-09	down
LOC_Os06g02960	3.44485	7.59147	-1.13994	6.75e-06	down
LOC_Os06g03030	1.3192	4.46315	-1.7584	0.0185735	down
LOC_Os06g03040	0.539522	2.42387	-2.16756	0.00466794	down
LOC_Os06g03050	0.243311	0.744533	-1.61353	0.012471	down
LOC_Os06g03220	4.07478	8.37645	-1.03962	0.000343839	down
LOC_Os06g03380	0.498834	2.8288	-2.50356	9.49e-05	down
LOC_Os06g03580	16.6192	34.5899	-1.0575	1.43e-06	down
LOC_Os06g03710	0.0900914	1.32212	-3.87532	0.00165315	down
LOC_Os06g03720	1.48835	4.94888	-1.73338	0.0157391	down
LOC_Os06g03890	1.35748	5.20608	-1.93927	5.8e-11	down
LOC_Os06g04590	7.22317	33.3791	-2.20824	2.92e-13	down
LOC_Os06g04699	0.419697	1.68677	-2.00684	0.0267793	down
LOC_Os06g04850	2.47864	17.044	-2.78165	3.07e-28	down
LOC_Os06g04870	3.74806	20.8746	-2.47753	3.32e-10	down
LOC_Os06g06250	35.6616	130.847	-1.87544	9.52e-24	down
LOC_Os06g06460	2.4012	21.3211	-3.15046	0.00510492	down
LOC_Os06g06510	2.11763	32.6887	-3.94826	0.00780749	down
LOC_Os06g07300	4.96937	14.8937	-1.58356	5.04e-12	down
LOC_Os06g07941	3.22839	8.52668	-1.40117	1.27e-10	down
LOC_Os06g08090	4.95919	10.234	-1.04519	2.31e-13	down
LOC_Os06g08100	5.29029	19.1065	-1.85265	1.13e-05	down
LOC_Os06g09340	4.10766	11.0072	-1.42206	0.000194264	down
LOC_Os06g10420	0.863566	2.26382	-1.39038	0.000238166	down
LOC_Os06g11330	14.1853	32.4334	-1.19308	7.26e-27	down
LOC_Os06g11660	2.10036	5.45236	-1.37625	0.000416245	down
LOC_Os06g11730	0.301489	0.928816	-1.62328	0.0443279	down
LOC_Os06g12310	16.7545	38.2398	-1.19053	7.9e-16	down
LOC_Os06g12320	11.4697	27.951	-1.28507	7.8e-07	down
LOC_Os06g13210	1.92415	5.16385	-1.42423	1.62e-07	down
LOC_Os06g14630	1.94269	6.45337	-1.732	7.15e-08	down
LOC_Os06g14810	4.72307	16.2767	-1.78501	2.93e-07	down
LOC_Os06g15610	12.065	28.5029	-1.24028	0.00760192	down
LOC_Os06g16300	13.8164	32.9693	-1.25474	5.58e-14	down
LOC_Os06g16640	7.43552	24.8653	-1.74163	7.67e-19	down
LOC_Os06g17490	0.172983	1.45604	-3.07335	0.00067964	down
LOC_Os06g17560	1.44205	5.24178	-1.86193	9.47e-05	down
LOC_Os06g17570	0.636498	2.21786	-1.80094	0.00135512	down
LOC_Os06g18930	2.05707	6.25396	-1.60418	8.2e-06	down
LOC_Os06g18960	1.02992	2.2549	-1.13053	0.000642848	down
LOC_Os06g20150	0.614167	3.19039	-2.37703	6.73e-05	down
LOC_Os06g20790	0.682881	1.20075	-0.814226	4.39e-05	down
LOC_Os06g21230	495.25	814.997	-0.718638	4.98e-05	down
LOC_Os06g21250	8.13627	34.061	-2.06568	9.24e-05	down
LOC_Os06g22050	0.708822	2.7778	-1.97045	1.85e-05	down
LOC_Os06g25950	1.79033	4.17975	-1.22319	0.00348228	down
LOC_Os06g28000	0.966665	4.40764	-2.18892	3.76e-11	down
LOC_Os06g28630	11.7178	20.8888	-0.834022	5.03e-13	down
LOC_Os06g29730	25.677	73.3394	-1.51411	0.0334229	down
LOC_Os06g36040	10.0747	21.1068	-1.06698	0.000739241	down
LOC_Os06g36050	6.62378	15.5615	-1.23226	1.56e-09	down
LOC_Os06g36450	1.09235	2.21606	-1.02057	0.014337	down
LOC_Os06g36670	0.862184	3.1986	-1.89137	0.0128369	down
LOC_Os06g36810	11.4671	34.9404	-1.6074	1.61e-06	down
LOC_Os06g39110	42.2807	92.0408	-1.12227	0.00499301	down
LOC_Os06g39120	37.3043	86.3572	-1.21097	0.000126761	down
LOC_Os06g39230	4.24666	11.1866	-1.39737	8.23e-15	down
LOC_Os06g39750	25.8072	54.5645	-1.08019	0.000135916	down
LOC_Os06g39780	1.28338	3.58973	-1.48392	0.013304	down
LOC_Os06g39880	3.87032	10.9408	-1.49919	0.00154333	down
LOC_Os06g40150	11.52	26.3786	-1.19523	0.00256099	down
LOC_Os06g40170	1.27636	2.75048	-1.10765	0.000166723	down
LOC_Os06g41060	5.53437	10.9895	-0.989628	0.000892612	down
LOC_Os06g41700	1.91129	5.35148	-1.48539	2.13e-06	down
LOC_Os06g43044	2.17473	12.4571	-2.51806	2.25e-06	down
LOC_Os06g43600	3.52612	14.1779	-2.0075	4.21e-05	down
LOC_Os06g43860	148.475	318.65	-1.10175	8.41e-30	down
LOC_Os06g44300	0.660905	1.85321	-1.48751	0.000427283	down
LOC_Os06g44320	1.01869	2.46342	-1.27394	0.00411572	down
LOC_Os06g44810	0.202225	0.498907	-1.30281	0.0232489	down
LOC_Os06g45580	1.78182	5.03949	-1.49993	0.0179723	down
LOC_Os06g45990	0.745612	5.97738	-3.00302	0.000681097	down
LOC_Os06g46350	6.93328	12.8329	-0.888236	0.000392461	down
LOC_Os06g46500	1.01246	7.49	-2.88709	4.28e-11	down
LOC_Os06g46680	14.0609	31.6489	-1.17047	9.02e-06	down
LOC_Os06g46990	0.323478	2.35099	-2.86153	0.00198961	down
LOC_Os06g46995	2.11936	4.08465	-0.946586	0.000243023	down
LOC_Os06g47600	8.591	23.9074	-1.47656	8.45e-07	down
LOC_Os06g47770	1.44048	3.46689	-1.26709	5.9e-05	down
LOC_Os06g48030	2.01419	18.3398	-3.1867	6.09e-23	down
LOC_Os06g48160	9.54864	67.2951	-2.81714	1.01e-11	down
LOC_Os06g48180	5.9725	14.2437	-1.25392	3.89e-08	down
LOC_Os06g48560	5.6184	13.4401	-1.25831	2.61e-09	down
LOC_Os06g49100	3.31459	10.0929	-1.60644	0.000261119	down
LOC_Os06g49220	7.13225	16.0749	-1.17238	1.9e-12	down
LOC_Os06g50900	1.20674	3.33845	-1.46806	0.00291873	down
LOC_Os06g50950	4.62563	9.17211	-0.987605	0.00731865	down
LOC_Os06g51110	0.0524183	0.994714	-4.24614	0.00820763	down
LOC_Os06g51320	0.538046	3.0303	-2.49366	3.83e-10	down
LOC_Os07g01110	1.02902	4.36678	-2.08529	7.92e-09	down
LOC_Os07g01180	0.696793	1.76069	-1.33734	0.00892326	down
LOC_Os07g01530	2.01882	5.70643	-1.49908	8.02e-09	down
LOC_Os07g01860	2.75785	6.07811	-1.14008	1.97e-06	down
LOC_Os07g02100	6.13092	12.6142	-1.04087	5.11e-11	down
LOC_Os07g02120	4.70408	9.42278	-1.00224	2.67e-07	down
LOC_Os07g02140	1.7064	5.13831	-1.59033	0.00126871	down
LOC_Os07g02150	1.06094	1.84146	-0.795504	0.0367582	down
LOC_Os07g02200	27.0036	58.6175	-1.11818	2.01e-05	down
LOC_Os07g02440	0.369275	1.81859	-2.30005	5.95e-06	down
LOC_Os07g02780	0.335643	0.817355	-1.28403	0.000440556	down
LOC_Os07g02810	1.45099	11.4687	-2.98258	4.44e-15	down
LOC_Os07g03120	2.87291	8.34514	-1.53843	0.00526703	down
LOC_Os07g03170	2.17181	5.263	-1.27699	0.0191572	down
LOC_Os07g04150	5.41197	14.5046	-1.42229	4.83e-09	down
LOC_Os07g04950	4.32149	15.9368	-1.88277	5.17e-06	down
LOC_Os07g04960	3.50957	9.87803	-1.49293	0.000876668	down
LOC_Os07g05024	0.190157	0.575333	-1.59721	0.0277599	down
LOC_Os07g05110	2.72455	5.84601	-1.10143	0.00705854	down
LOC_Os07g05190	0.581113	3.08138	-2.40669	1.32e-06	down
LOC_Os07g05460	1.87065	4.88009	-1.38337	5.66e-05	down
LOC_Os07g05740	0.717268	1.75798	-1.29333	2.82e-07	down
LOC_Os07g06860	1.71018	11.8655	-2.79454	4.7e-09	down
LOC_Os07g07990	11.5159	26.8932	-1.22361	2.07e-13	down
LOC_Os07g08350	0.359103	1.78737	-2.31537	0.000421834	down
LOC_Os07g08710	77.1105	173.05	-1.16619	1.69e-36	down
LOC_Os07g10530	4.58152	15.3134	-1.74089	2.67e-06	down
LOC_Os07g10910	0.236558	0.548888	-1.21432	0.00191648	down
LOC_Os07g12100	0.24875	2.94855	-3.56724	5.37e-15	down
LOC_Os07g14740	3.59727	9.79995	-1.44587	0.00034924	down
LOC_Os07g14850	16.7423	35.0123	-1.06436	6.54e-18	down
LOC_Os07g15370	0.556726	6.41771	-3.52702	1.38e-44	down
LOC_Os07g17970	2.89359	7.02754	-1.28016	1.38e-07	down
LOC_Os07g18230	3.37573	7.1808	-1.08895	0.000958663	down
LOC_Os07g18750	1.53208	9.01827	-2.55736	0.000883813	down
LOC_Os07g18990	20.0374	52.8865	-1.40021	9.17e-17	down
LOC_Os07g19140	0.197839	0.455877	-1.20432	4.65e-05	down
LOC_Os07g22580	0.0234253	1.09811	-5.55082	0.00567799	down
LOC_Os07g25810	5.55817	17.4697	-1.65217	1.26e-16	down
LOC_Os07g26630	1.84919	4.21521	-1.18871	0.00515083	down
LOC_Os07g26660	2.79684	7.91775	-1.50129	0.0170573	down
LOC_Os07g28890	1.29703	2.40647	-0.891708	0.00162514	down
LOC_Os07g29190	0.137097	1.26862	-3.20999	0.024701	down
LOC_Os07g29430	1.09182	4.24418	-1.95875	0.00297122	down
LOC_Os07g29950	0.891666	2.40322	-1.43039	0.0146712	down
LOC_Os07g29960	1.00382	2.25236	-1.16593	7.12e-06	down
LOC_Os07g30620	8.26591	18.7787	-1.18385	1.96e-07	down
LOC_Os07g31500	2.51841	7.42274	-1.55944	1.65e-14	down
LOC_Os07g31960	1.87881	6.38086	-1.76393	9.11e-06	down
LOC_Os07g32390	0.260952	1.64791	-2.65879	0.019616	down
LOC_Os07g32660	1.1092	4.2598	-1.94126	8.88e-10	down
LOC_Os07g32680	0.874213	2.56468	-1.55272	1.32e-05	down
LOC_Os07g33350	24.4869	69.2416	-1.49963	9.33e-11	down
LOC_Os07g33620	0.550523	1.95696	-1.82974	0.00148853	down
LOC_Os07g34020	9.81389	19.9922	-1.02654	6.89e-07	down
LOC_Os07g34720	0.952854	3.73699	-1.97155	0.00093401	down
LOC_Os07g34850	0.671149	3.74997	-2.48218	0.0138167	down
LOC_Os07g35004	5.34788	13.3692	-1.32188	4.19e-18	down
LOC_Os07g35520	0.755531	7.44996	-3.30167	3.51e-08	down
LOC_Os07g35560	2.01585	6.34317	-1.65381	0.00049588	down
LOC_Os07g35630	1.04497	1.93102	-0.885899	0.000185904	down
LOC_Os07g35750	0.0440463	0.236635	-2.42557	4.65e-05	down
LOC_Os07g36690	0.396943	1.08345	-1.44863	0.00691441	down
LOC_Os07g37110	0.535023	1.26022	-1.236	0.000697651	down
LOC_Os07g37150	0.180312	0.566829	-1.65242	0.00034589	down
LOC_Os07g37230	5.09757	21.1133	-2.05027	7.28e-53	down
LOC_Os07g37385	1.31687	8.99312	-2.77171	0.00427636	down
LOC_Os07g37810	6.13931	13.4112	-1.12729	3.05e-06	down
LOC_Os07g37850	160.89	449.66	-1.48276	1.48e-07	down
LOC_Os07g38790	2.13982	5.30581	-1.31008	1.24e-05	down
LOC_Os07g39820	0.383561	1.08898	-1.50545	0.00897109	down
LOC_Os07g39850	2.26337	5.17016	-1.19173	0.00151717	down
LOC_Os07g40130	119.654	321.911	-1.42779	2.71e-06	down
LOC_Os07g40900	0.55011	1.7069	-1.63358	0.00149128	down
LOC_Os07g40940	18.4342	39.4213	-1.09659	0.000143308	down
LOC_Os07g41200	2.42421	5.33858	-1.13894	3.45e-11	down
LOC_Os07g41600	12.8446	26.2428	-1.03076	4.96e-12	down
LOC_Os07g42420	7.71859	18.8986	-1.29187	1.69e-10	down
LOC_Os07g42510	4.74376	14.6522	-1.62701	1.89e-21	down
LOC_Os07g42560	1.54297	3.2559	-1.07735	7.97e-06	down
LOC_Os07g42590	3.07153	7.44689	-1.27768	1.2e-05	down
LOC_Os07g42730	5.20505	11.5681	-1.15217	0.00472938	down
LOC_Os07g42924	1.539	5.16827	-1.74769	4.12e-10	down
LOC_Os07g43120	0.0986511	0.280152	-1.5058	0.0149743	down
LOC_Os07g44070	7.88804	19.3911	-1.29766	1.46e-07	down
LOC_Os07g44370	3.9701	8.63678	-1.12132	7.33e-05	down
LOC_Os07g44830	0.388933	1.47648	-1.92457	0.00299036	down
LOC_Os07g45080	1.25143	10.553	-3.076	4.59e-06	down
LOC_Os07g45570	19.4597	46.1111	-1.24462	2.04e-29	down
LOC_Os07g46540	0.398691	0.835297	-1.06702	0.049027	down
LOC_Os07g47450	41.0167	102.309	-1.31865	5.1e-27	down
LOC_Os07g47750	19.3011	52.2677	-1.43724	3.54e-10	down
LOC_Os07g47960	1.68563	3.87471	-1.2008	0.000255511	down
LOC_Os07g48060	4.43622	12.4365	-1.48718	1.01e-09	down
LOC_Os07g48330	1.22907	3.51247	-1.51492	4.06e-06	down
LOC_Os07g48370	2.52514	5.60236	-1.14967	9.34e-06	down
LOC_Os07g48760	0.162298	0.502414	-1.63023	0.00286672	down
LOC_Os07g49000	0.78367	2.33596	-1.5757	3.37e-05	down
LOC_Os07g49140	1.50452	3.94137	-1.3894	0.00749071	down
LOC_Os07g49310	1.91793	5.17083	-1.43084	1.67e-08	down
LOC_Os08g01100	0.542959	5.82859	-3.42423	0.00462283	down
LOC_Os08g01140	20.1694	46.9479	-1.2189	1.45e-05	down
LOC_Os08g01274	0.117252	0.503875	-2.10346	0.0287769	down
LOC_Os08g01330	0.656293	2.86951	-2.1284	5.39e-11	down
LOC_Os08g01514	6.0728	15.0532	-1.30964	1.74e-07	down
LOC_Os08g01670	3.57456	8.41241	-1.23475	2.67e-07	down
LOC_Os08g01940	2.96951	6.33385	-1.09286	1.12e-13	down
LOC_Os08g01950	0.929711	2.48044	-1.41574	0.00331166	down
LOC_Os08g02120	97.6361	209.93	-1.10442	1.27e-31	down
LOC_Os08g02230	3.30456	10.1837	-1.62373	6.35e-27	down
LOC_Os08g02990	2.17475	5.16171	-1.247	1.19e-06	down
LOC_Os08g03020	0.696139	1.4119	-1.02019	0.00567086	down
LOC_Os08g03180	0.000197188	0.454408	-11.1702	3.25e-12	down
LOC_Os08g03400	3.56583	8.68096	-1.28361	0.000109341	down
LOC_Os08g03560	0.0104371	0.190795	-4.19223	0.0174419	down
LOC_Os08g04500	7.4715	65.4859	-3.13171	2.83e-52	down
LOC_Os08g05010	0.545103	3.13166	-2.52233	7.03e-16	down
LOC_Os08g05290	1.0618	2.32097	-1.12822	0.0365376	down
LOC_Os08g06550	474.116	1015.57	-1.09898	2.62e-34	down
LOC_Os08g06600	0.0791679	0.321492	-2.0218	0.0235018	down
LOC_Os08g07740	0.809759	2.15696	-1.41344	0.000930754	down
LOC_Os08g07890	0.463263	1.04506	-1.17369	2.18e-07	down
LOC_Os08g08140	0.232707	0.586241	-1.33298	1.94e-05	down
LOC_Os08g08960	0.367405	1.13914	-1.6325	0.0238149	down
LOC_Os08g08970	2.8961	6.802	-1.23185	0.000118612	down
LOC_Os08g08980	1.68765	3.86471	-1.19535	0.0202655	down
LOC_Os08g10010	4.5261	11.609	-1.3589	0.0335007	down
LOC_Os08g10080	1.94664	21.2517	-3.44852	3.89e-71	down
LOC_Os08g10130	1.95179	5.89176	-1.5939	3.96e-38	down
LOC_Os08g10180	0.0324888	0.132185	-2.02454	0.00497184	down
LOC_Os08g10260	0.771347	1.68733	-1.12929	9.15e-05	down
LOC_Os08g10300	0.484545	1.71841	-1.82637	2.33e-16	down
LOC_Os08g10310	0.142746	1.11763	-2.96892	2.36e-12	down
LOC_Os08g12800	0.970141	2.84298	-1.55114	5.29e-05	down
LOC_Os08g13440	6.1191	14.0285	-1.19697	1.4e-10	down
LOC_Os08g13920	44.042	125.597	-1.51185	3.84e-29	down
LOC_Os08g14109	0.620447	1.58749	-1.35537	0.0054373	down
LOC_Os08g14700	0.383303	2.45025	-2.67637	0.000284636	down
LOC_Os08g16030	0.666953	2.39038	-1.84158	0.000654215	down
LOC_Os08g16830	20.5272	57.0112	-1.47371	4.56e-32	down
LOC_Os08g17160	1.43905	14.6702	-3.3497	2.24e-06	down
LOC_Os08g18920	0.941683	1.99238	-1.08118	5.39e-05	down
LOC_Os08g22604	0.159041	2.6214	-4.04287	0.000267867	down
LOC_Os08g24790	22.7255	55.8147	-1.29633	4.15e-11	down
LOC_Os08g26710	0.319516	2.77973	-3.12099	9.57e-16	down
LOC_Os08g26840	12.6866	24.4908	-0.948934	1.48e-05	down
LOC_Os08g27170	0.551252	1.08996	-0.98349	0.0185731	down
LOC_Os08g28670	1.84188	16.9881	-3.20527	2.52e-30	down
LOC_Os08g29200	1.42629	5.79811	-2.02332	1.21e-21	down
LOC_Os08g31030	3.88011	12.1222	-1.64349	0.00204793	down
LOC_Os08g31060	0.471581	1.82187	-1.94984	7.35e-08	down
LOC_Os08g32500	0.190982	0.987184	-2.36988	0.00313929	down
LOC_Os08g32920	0.0902477	0.224086	-1.31209	0.0296743	down
LOC_Os08g33100	29.6166	62.7516	-1.08325	0.0194324	down
LOC_Os08g33660	1.61573	5.72884	-1.82605	1.36e-12	down
LOC_Os08g34020	1.20694	2.19047	-0.859891	0.0250223	down
LOC_Os08g34320	2.19942	5.47883	-1.31675	0.000719244	down
LOC_Os08g34380	0.496798	1.43268	-1.52798	2.88e-05	down
LOC_Os08g34720	31.8735	72.7533	-1.19066	1.08e-36	down
LOC_Os08g35110	1.2419	3.57254	-1.5244	0.000620982	down
LOC_Os08g35160	5.456	17.9106	-1.71489	1.66e-17	down
LOC_Os08g35710	17.409	36.1592	-1.05453	9.08e-11	down
LOC_Os08g35760	39.2587	285.503	-2.86242	0.00249662	down
LOC_Os08g36500	0.251753	0.821028	-1.70543	0.0278966	down
LOC_Os08g36570	3.21639	4.86712	-0.597625	0.00709742	down
LOC_Os08g36680	0.905253	2.96279	-1.71056	0.000327558	down
LOC_Os08g37432	3.04548	14.1383	-2.21487	9.79e-48	down
LOC_Os08g37890	1.12617	3.842	-1.77043	0.00205452	down
LOC_Os08g37940	8.30607	20.4034	-1.29658	1.11e-24	down
LOC_Os08g38270	26.3701	60.346	-1.19436	4.25e-11	down
LOC_Os08g38300	23.5658	97.4008	-2.04724	0.00150292	down
LOC_Os08g38400	4.96936	9.88	-0.991452	5.99e-08	down
LOC_Os08g39240	0.456868	1.60005	-1.80827	1.26e-10	down
LOC_Os08g39270	4.46102	20.9739	-2.23315	2.89e-12	down
LOC_Os08g39330	0.857376	17.5485	-4.35527	0.0175099	down
LOC_Os08g39570	0.0555436	0.282466	-2.34638	0.000100533	down
LOC_Os08g39590	3.94781	10.8167	-1.45413	0.00284779	down
LOC_Os08g39760	0.129614	0.338243	-1.38383	5.34e-06	down
LOC_Os08g39830	0.610999	4.0033	-2.71195	4.03e-24	down
LOC_Os08g39840	1.07429	2.22677	-1.05157	0.0456287	down
LOC_Os08g39850	1.50245	2.96333	-0.979897	0.000291722	down
LOC_Os08g39860	6.38008	13.3026	-1.06006	5.02e-14	down
LOC_Os08g40060	15.1767	33.4105	-1.13844	1.33e-19	down
LOC_Os08g40170	0.511708	5.41588	-3.4038	4.48e-05	down
LOC_Os08g41070	0.0274939	0.119675	-2.12193	0.0248516	down
LOC_Os08g41290	30.6143	86.0857	-1.49157	4.84e-10	down
LOC_Os08g41320	5.05302	11.0504	-1.12888	2.47e-13	down
LOC_Os08g41800	0.459534	1.57834	-1.78016	0.0137227	down
LOC_Os08g42350	0.107696	2.45169	-4.50874	1.46e-13	down
LOC_Os08g42470	0.852255	1.77964	-1.06223	0.0189221	down
LOC_Os08g43430	5.94228	12.7295	-1.09909	1.88e-06	down
LOC_Os08g43600	3.98855	9.76229	-1.29135	0.000200219	down
LOC_Os08g43730	0.441129	1.472	-1.73851	0.000504676	down
LOC_Os08g44420	0.375256	1.4013	-1.90081	0.0392904	down
LOC_Os08g44620	3.02603	6.36108	-1.07185	1.87e-06	down
LOC_Os08g44840	6.52581	26.8937	-2.04304	3.54e-16	down
LOC_Os08g45060	2.06792	5.94944	-1.52457	5.83e-05	down
LOC_Os09g02360	0.937705	1.92669	-1.03892	0.0346981	down
LOC_Os09g04710	15.8731	37.2763	-1.23168	9.68e-07	down
LOC_Os09g07440	0.815217	2.66432	-1.70851	1.65e-16	down
LOC_Os09g08720	1.51151	4.60479	-1.60714	0.00145162	down
LOC_Os09g10340	0.65559	7.86257	-3.58413	7.82e-16	down
LOC_Os09g10730	1.18287	3.55697	-1.58836	0.00109541	down
LOC_Os09g11440	0.0842165	0.666269	-2.98393	0.0187561	down
LOC_Os09g12290	1.14867	3.70922	-1.69116	6.03e-09	down
LOC_Os09g12720	2.54126	5.23659	-1.04308	0.000358315	down
LOC_Os09g13400	0.328002	0.880346	-1.42437	0.00779406	down
LOC_Os09g13410	0.8735	2.72094	-1.63922	0.00475746	down
LOC_Os09g13470	4.88406	17.0716	-1.80545	5.43e-28	down
LOC_Os09g14870	0.26292	0.634703	-1.27146	0.0309312	down
LOC_Os09g15170	0.792709	2.6564	-1.74461	1.09e-11	down
LOC_Os09g15480	14.0446	47.7235	-1.76468	9.6e-62	down
LOC_Os09g16449	0.866728	1.801	-1.05514	6.11e-10	down
LOC_Os09g16950	11.4324	24.6511	-1.10853	1.59e-05	down
LOC_Os09g17329	5.65248	15.9786	-1.49919	9.77e-39	down
LOC_Os09g17660	3.51784	18.7073	-2.41084	9.82e-08	down
LOC_Os09g18159	3.58055	6.4016	-0.83825	7.23e-12	down
LOC_Os09g18230	0.777012	3.98501	-2.35858	5.47e-17	down
LOC_Os09g19500	0.218525	0.627451	-1.5217	3.81e-09	down
LOC_Os09g19710	0.0411255	0.641547	-3.96345	0.000120471	down
LOC_Os09g19930	10.6733	21.6209	-1.01842	0.00101164	down
LOC_Os09g20090	0.525962	1.45036	-1.46338	0.00972661	down
LOC_Os09g20540	1.13428	2.60355	-1.1987	0.0482271	down
LOC_Os09g20940	7.05045	16.9894	-1.26884	0.000243132	down
LOC_Os09g22410	16.9243	34.2984	-1.01904	0.00165369	down
LOC_Os09g23560	0.273279	1.23993	-2.18181	0.00201351	down
LOC_Os09g24620	29.8562	74.6621	-1.32235	4.77e-41	down
LOC_Os09g24810	3.35644	21.6417	-2.68881	2.93e-15	down
LOC_Os09g25570	1.87375	5.98726	-1.67597	7.82e-08	down
LOC_Os09g25610	0.537041	1.46231	-1.44515	0.0392782	down
LOC_Os09g25860	0.630337	1.55824	-1.30572	0.0104262	down
LOC_Os09g26360	0.271656	0.749025	-1.46323	0.0277573	down
LOC_Os09g26590	7.17596	15.6494	-1.12486	2.47e-06	down
LOC_Os09g27580	8.03387	16.8431	-1.06799	0.0171186	down
LOC_Os09g27750	12.907	45.1605	-1.80691	0.0133159	down
LOC_Os09g27820	2.17199	8.24284	-1.92412	5.71e-05	down
LOC_Os09g27890	2.0207	8.67429	-2.10189	0.000190947	down
LOC_Os09g27930	0.0286454	5.18224	-7.49913	0.00886736	down
LOC_Os09g28720	2.14028	4.60366	-1.10498	0.0015745	down
LOC_Os09g28880	0.192903	0.485752	-1.33234	0.00125972	down
LOC_Os09g29360	1.81958	4.08697	-1.16742	0.000983471	down
LOC_Os09g29670	0.233234	1.02996	-2.14274	0.000248756	down
LOC_Os09g31019	0.072352	3.97577	-5.78006	0.00437393	down
LOC_Os09g31031	12.8321	81.3698	-2.66474	0.0127089	down
LOC_Os09g31230	3.75856	8.60513	-1.19502	3.57e-19	down
LOC_Os09g32290	15.8474	38.3345	-1.27439	5.95e-06	down
LOC_Os09g32670	8.32708	21.5809	-1.37388	6.24e-17	down
LOC_Os09g32964	4.58294	13.3952	-1.54737	2.68e-06	down
LOC_Os09g33830	0.407015	2.9169	-2.84128	4.4e-15	down
LOC_Os09g34214	0.107373	1.91278	-4.15497	0.01182	down
LOC_Os09g35600	1.63911	4.1652	-1.34548	0.00951117	down
LOC_Os09g35940	9.87964	33.1535	-1.74663	2.07e-10	down
LOC_Os09g36280	0.198072	2.43776	-3.62146	0.0189093	down
LOC_Os09g36740	0.0827128	2.3488	-4.82767	0.00690909	down
LOC_Os09g37050	2.63664	8.63184	-1.71097	1.53e-05	down
LOC_Os09g37480	2.0661	10.1558	-2.29732	2.85e-12	down
LOC_Os09g37500	1.71302	5.4519	-1.67022	0.00050906	down
LOC_Os09g37510	0.0309641	0.587127	-4.245	0.00129517	down
LOC_Os09g37600	1.44341	7.45894	-2.36949	0.00101313	down
LOC_Os09g37710	10.4153	23.903	-1.19848	3.04e-36	down
LOC_Os09g37910	20.0255	51.0064	-1.34884	8.11e-05	down
LOC_Os09g38450	0.125072	0.931705	-2.89711	1.85e-06	down
LOC_Os09g39410	4.18762	24.6549	-2.55767	5.12e-14	down
LOC_Os10g01570	0.156096	1.31944	-3.07942	0.0363908	down
LOC_Os10g01920	0.176451	1.33063	-2.91477	0.0295549	down
LOC_Os10g02040	5.83604	20.4528	-1.80924	3.57e-23	down
LOC_Os10g02100	1.46221	3.7929	-1.37515	3.42e-07	down
LOC_Os10g02680	0.626082	0.7786	-0.31453	0.0129601	down
LOC_Os10g02770	2.67626	7.60875	-1.50744	0.0038987	down
LOC_Os10g05130	10.9633	33.1741	-1.59738	3.03e-25	down
LOC_Os10g05490	1.41296	3.04383	-1.10717	0.000255426	down
LOC_Os10g05600	1.67233	4.9244	-1.55809	9.97e-05	down
LOC_Os10g05750	37.7137	133.199	-1.82042	2.06e-06	down
LOC_Os10g05820	5.29909	41.0023	-2.95189	5.1e-24	down
LOC_Os10g05860	6.40174	42.4035	-2.72765	3.96e-12	down
LOC_Os10g05930	4.47816	51.6744	-3.52847	2.63e-26	down
LOC_Os10g05950	0.553745	70.2915	-6.98798	5.17e-58	down
LOC_Os10g05970	141.622	491.194	-1.79424	4.12e-09	down
LOC_Os10g05980	131.412	433.762	-1.72281	3.99e-08	down
LOC_Os10g05990	41.7023	274.86	-2.7205	3.14e-24	down
LOC_Os10g06000	42.3636	325.822	-2.94319	3.72e-36	down
LOC_Os10g07200	1.95766	7.32163	-1.90303	1.88e-05	down
LOC_Os10g07210	14.1824	37.5167	-1.40343	7.35e-06	down
LOC_Os10g07290	1.65652	10.566	-2.6732	7.18e-13	down
LOC_Os10g07556	0.540646	2.40992	-2.15623	4.89e-14	down
LOC_Os10g09870	1.0043	2.0672	-1.04149	0.00860258	down
LOC_Os10g11022	4.0976	12.2512	-1.58007	5.28e-05	down
LOC_Os10g11889	4.96753	27.3324	-2.46001	0.00158698	down
LOC_Os10g11980	1.2058	3.72711	-1.62806	5.6e-07	down
LOC_Os10g17960	0.502251	1.11415	-1.14946	0.00240299	down
LOC_Os10g18820	0.613734	3.84217	-2.64623	1.63e-06	down
LOC_Os10g20770	0.110869	0.544471	-2.29599	0.0187502	down
LOC_Os10g20890	1.91146	6.99091	-1.8708	0.00274605	down
[truncated: 208 more rows]

## Sheet: Sheet 2, OE_GO enrichment
Sheet 2. GO enrichment of all DEGs in JAZ1-OE.
GO_ID	GO_term	ontology	Items	p_adj	pvalue	MSU Locus
GO:0003700	sequence-specific DNA binding transcription factor activity	Molecular Function	161	0	0	LOC_Os11g03300;LOC_Os11g05640;LOC_Os11g03370;LOC_Os03g04770;LOC_Os12g37970;LOC_Os03g08460;LOC_Os02g43940;LOC_Os06g04870;LOC_Os12g03040;LOC_Os01g13520;LOC_Os02g45420;LOC_Os12g39220;LOC_Os01g54890;LOC_Os04g38780;LOC_Os02g43820;LOC_Os02g08440;LOC_Os03g51910;LOC_Os12g33070;LOC_Os02g49480;LOC_Os03g15790;LOC_Os01g64020;LOC_Os02g07930;LOC_Os09g35010;LOC_Os10g32900;LOC_Os03g42630;LOC_Os09g24810;LOC_Os10g…
GO:0046658	anchored component of plasma membrane	Cellular Component	45	0	0	LOC_Os01g42294;LOC_Os02g20540;LOC_Os07g41320;LOC_Os06g46500;LOC_Os02g43660;LOC_Os07g35480;LOC_Os08g14700;LOC_Os08g38270;LOC_Os07g02810;LOC_Os01g47780;LOC_Os04g39610;LOC_Os02g03750;LOC_Os04g05050;LOC_Os07g32660;LOC_Os09g27890;LOC_Os07g37150;LOC_Os07g02200;LOC_Os06g01490;LOC_Os08g12800;LOC_Os02g53200;LOC_Os07g35520;LOC_Os10g36390;LOC_Os07g40940;LOC_Os03g57880;LOC_Os11g36940;LOC_Os10g07290;LOC_Os02g…
GO:0005576	extracellular region	Cellular Component	163	0	0	LOC_Os01g03320;LOC_Os01g11340;LOC_Os01g63930;LOC_Os02g52010;LOC_Os06g44260;LOC_Os08g37890;LOC_Os07g31390;LOC_Os08g36680;LOC_Os10g33240;LOC_Os01g03680;LOC_Os07g38790;LOC_Os03g14654;LOC_Os12g43450;LOC_Os01g03360;LOC_Os05g04700;LOC_Os08g33710;LOC_Os06g46950;LOC_Os02g50690;LOC_Os01g60770;LOC_Os03g49610;LOC_Os10g40720;LOC_Os03g17790;LOC_Os05g12040;LOC_Os08g01140;LOC_Os04g43390;LOC_Os07g35560;LOC_Os07g…
GO:0009505	plant-type cell wall	Cellular Component	169	0	0	LOC_Os11g10460;LOC_Os03g51240;LOC_Os10g02040;LOC_Os01g04230;LOC_Os06g09340;LOC_Os03g64340;LOC_Os04g41640;LOC_Os06g51440;LOC_Os07g32680;LOC_Os10g41430;LOC_Os12g35670;LOC_Os12g42860;LOC_Os09g36280;LOC_Os10g25450;LOC_Os01g25540;LOC_Os01g19170;LOC_Os01g60330;LOC_Os06g48160;LOC_Os01g15970;LOC_Os10g05750;LOC_Os05g08420;LOC_Os01g20780;LOC_Os02g51620;LOC_Os05g41990;LOC_Os04g52250;LOC_Os01g50900;LOC_Os03g…
GO:0048046	apoplast	Cellular Component	161	0	0	LOC_Os03g44880;LOC_Os03g06940;LOC_Os04g53860;LOC_Os10g05600;LOC_Os01g58280;LOC_Os02g54060;LOC_Os06g48300;LOC_Os10g39170;LOC_Os02g10520;LOC_Os04g46560;LOC_Os02g16940;LOC_Os03g48780;LOC_Os02g14160;LOC_Os01g19220;LOC_Os07g48060;LOC_Os03g06290;LOC_Os03g55350;LOC_Os01g52160;LOC_Os03g02750;LOC_Os03g13570;LOC_Os04g17100;LOC_Os12g19470;LOC_Os08g13440;LOC_Os12g06660;LOC_Os01g12580;LOC_Os02g07870;LOC_Os01g…
GO:0009737	response to abscisic acid	Biological Process	169	0	0	LOC_Os01g04710;LOC_Os10g40600;LOC_Os05g45100;LOC_Os12g42280;LOC_Os04g30040;LOC_Os06g30370;LOC_Os10g17960;LOC_Os10g30280;LOC_Os05g03130;LOC_Os01g64360;LOC_Os05g49170;LOC_Os05g41780;LOC_Os03g27370;LOC_Os03g41390;LOC_Os11g38860;LOC_Os05g49440;LOC_Os04g53860;LOC_Os04g49980;LOC_Os03g40100;LOC_Os11g39450;LOC_Os12g41110;LOC_Os07g05940;LOC_Os03g01300;LOC_Os03g48310;LOC_Os08g01330;LOC_Os04g45810;LOC_Os05g…
GO:0010106	cellular response to iron ion starvation	Biological Process	50	0	0	LOC_Os11g01730;LOC_Os07g01180;LOC_Os03g02920;LOC_Os06g20150;LOC_Os01g74450;LOC_Os07g34020;LOC_Os09g32964;LOC_Os07g42924;LOC_Os06g48030;LOC_Os07g18230;LOC_Os12g35610;LOC_Os12g01730;LOC_Os05g05670;LOC_Os08g35760;LOC_Os02g08440;LOC_Os11g38870;LOC_Os04g55850;LOC_Os10g36924;LOC_Os12g37840;LOC_Os07g26630;LOC_Os01g63180;LOC_Os05g19670;LOC_Os05g05680;LOC_Os01g16450;LOC_Os12g39220;LOC_Os07g01110;LOC_Os03g…
GO:0010363	regulation of plant-type hypersensitive response	Biological Process	124	0	0	LOC_Os03g01300;LOC_Os12g35610;LOC_Os07g28890;LOC_Os06g11330;LOC_Os04g59320;LOC_Os01g41200;LOC_Os03g02920;LOC_Os12g04500;LOC_Os02g51890;LOC_Os03g50960;LOC_Os06g14670;LOC_Os05g39240;LOC_Os09g28440;LOC_Os01g02570;LOC_Os02g51900;LOC_Os10g25030;LOC_Os12g08090;LOC_Os12g09300;LOC_Os01g08260;LOC_Os08g39830;LOC_Os04g56470;LOC_Os05g42180;LOC_Os09g21710;LOC_Os02g15750;LOC_Os01g20860;LOC_Os03g08930;LOC_Os07g…
GO:0006826	iron ion transport	Biological Process	54	0	0	LOC_Os05g41990;LOC_Os08g10310;LOC_Os11g01530;LOC_Os01g50900;LOC_Os02g01590;LOC_Os10g39170;LOC_Os12g34524;LOC_Os04g52310;LOC_Os11g43980;LOC_Os02g56510;LOC_Os12g15530;LOC_Os08g02070;LOC_Os01g08020;LOC_Os01g18170;LOC_Os07g02440;LOC_Os07g26660;LOC_Os02g02460;LOC_Os04g56180;LOC_Os02g34600;LOC_Os12g26290;LOC_Os06g12310;LOC_Os02g16500;LOC_Os03g48780;LOC_Os06g29790;LOC_Os03g19420;LOC_Os04g48930;LOC_Os05g…
GO:0009409	response to cold	Biological Process	151	0	0	LOC_Os02g54060;LOC_Os02g15750;LOC_Os01g20860;LOC_Os04g53860;LOC_Os02g43330;LOC_Os11g38860;LOC_Os03g41390;LOC_Os08g31580;LOC_Os10g39170;LOC_Os05g03130;LOC_Os03g28330;LOC_Os03g01530;LOC_Os03g16170;LOC_Os02g18410;LOC_Os08g39830;LOC_Os12g42280;LOC_Os01g60340;LOC_Os07g36690;LOC_Os01g34560;LOC_Os01g64110;LOC_Os04g56180;LOC_Os06g29180;LOC_Os01g12580;LOC_Os12g19470;LOC_Os08g36440;LOC_Os05g12630;LOC_Os03g…
GO:0050832	defense response to fungus	Biological Process	145	0	0	LOC_Os12g34524;LOC_Os05g34830;LOC_Os03g52650;LOC_Os06g43600;LOC_Os04g46830;LOC_Os03g18960;LOC_Os07g48450;LOC_Os11g43980;LOC_Os12g03150;LOC_Os01g02600;LOC_Os10g42130;LOC_Os04g59370;LOC_Os03g21710;LOC_Os06g07220;LOC_Os05g25350;LOC_Os05g25260;LOC_Os02g52040;LOC_Os07g42510;LOC_Os06g11660;LOC_Os01g72460;LOC_Os05g40010;LOC_Os04g51610;LOC_Os09g23560;LOC_Os05g04820;LOC_Os01g48570;LOC_Os04g52260;LOC_Os01g…
GO:0010583	response to cyclopentenone	Biological Process	49	0	0	LOC_Os07g40290;LOC_Os08g36920;LOC_Os03g08460;LOC_Os02g45620;LOC_Os01g49710;LOC_Os10g38710;LOC_Os12g37970;LOC_Os04g53930;LOC_Os01g70560;LOC_Os01g09100;LOC_Os01g11340;LOC_Os04g54930;LOC_Os02g43560;LOC_Os06g46950;LOC_Os11g42800;LOC_Os09g23560;LOC_Os05g04600;LOC_Os10g38780;LOC_Os01g63770;LOC_Os10g38730;LOC_Os01g33040;LOC_Os12g07030;LOC_Os04g46220;LOC_Os07g42510;LOC_Os01g20206;LOC_Os10g38360;LOC_Os12g…
GO:0010200	response to chitin	Biological Process	124	0	0	LOC_Os01g06640;LOC_Os06g48180;LOC_Os01g60600;LOC_Os03g09170;LOC_Os09g23620;LOC_Os07g37210;LOC_Os05g02150;LOC_Os09g16449;LOC_Os02g06140;LOC_Os10g25550;LOC_Os01g72530;LOC_Os05g10670;LOC_Os02g52670;LOC_Os06g47600;LOC_Os01g26300;LOC_Os09g08720;LOC_Os04g34230;LOC_Os08g43120;LOC_Os04g58810;LOC_Os12g07030;LOC_Os12g40920;LOC_Os09g31522;LOC_Os03g17760;LOC_Os01g02370;LOC_Os01g02400;LOC_Os02g49986;LOC_Os08g…
GO:0006612	protein targeting to membrane	Biological Process	114	0	0	LOC_Os05g41990;LOC_Os09g19710;LOC_Os03g21030;LOC_Os02g41510;LOC_Os11g10460;LOC_Os12g33070;LOC_Os01g64020;LOC_Os03g42630;LOC_Os01g52260;LOC_Os01g47760;LOC_Os09g32470;LOC_Os01g54030;LOC_Os11g03300;LOC_Os08g07890;LOC_Os07g18230;LOC_Os01g02750;LOC_Os11g45540;LOC_Os12g03040;LOC_Os07g40290;LOC_Os03g08930;LOC_Os02g15750;LOC_Os01g20860;LOC_Os07g49390;LOC_Os01g72330;LOC_Os12g09300;LOC_Os01g08260;LOC_Os08g…
GO:0009611	response to wounding	Biological Process	128	0	0	LOC_Os12g07640;LOC_Os05g37250;LOC_Os11g35400;LOC_Os02g36890;LOC_Os04g01470;LOC_Os10g02100;LOC_Os03g60850;LOC_Os01g09100;LOC_Os11g03440;LOC_Os01g09830;LOC_Os04g33740;LOC_Os05g04820;LOC_Os05g44210;LOC_Os02g46460;LOC_Os12g37690;LOC_Os01g57770;LOC_Os03g60570;LOC_Os01g63540;LOC_Os04g55520;LOC_Os10g42130;LOC_Os04g51460;LOC_Os12g03150;LOC_Os02g56510;LOC_Os07g48450;LOC_Os05g27010;LOC_Os03g52650;LOC_Os08g…
GO:0009414	response to water deprivation	Biological Process	186	0	0	LOC_Os10g09870;LOC_Os06g03670;LOC_Os03g27370;LOC_Os05g41780;LOC_Os03g41390;LOC_Os04g53860;LOC_Os08g04560;LOC_Os06g07030;LOC_Os04g10010;LOC_Os03g58350;LOC_Os04g49980;LOC_Os01g04710;LOC_Os02g34600;LOC_Os01g08260;LOC_Os10g40600;LOC_Os07g36690;LOC_Os11g01570;LOC_Os12g42280;LOC_Os09g21710;LOC_Os08g10080;LOC_Os08g39830;LOC_Os02g18410;LOC_Os03g16170;LOC_Os09g28440;LOC_Os03g60300;LOC_Os06g14670;LOC_Os04g…
GO:0046688	response to copper ion	Biological Process	25	6.85646e-10	4.18332e-13	LOC_Os05g10210;LOC_Os03g12530;LOC_Os01g62490;LOC_Os11g01730;LOC_Os11g48060;LOC_Os02g55134;LOC_Os03g15960;LOC_Os01g04370;LOC_Os05g09704;LOC_Os01g04380;LOC_Os01g03914;LOC_Os01g63180;LOC_Os05g09740;LOC_Os07g46990;LOC_Os05g09724;LOC_Os12g15530;LOC_Os05g38390;LOC_Os03g16610;LOC_Os01g62600;LOC_Os03g16030;LOC_Os02g54140;LOC_Os01g04360;LOC_Os03g18640;LOC_Os12g01730;LOC_Os07g01110
GO:0015706	nitrate transport	Biological Process	75	4.55387e-09	2.77844e-12	LOC_Os06g07220;LOC_Os01g28840;LOC_Os11g10460;LOC_Os07g02440;LOC_Os10g40600;LOC_Os01g25484;LOC_Os04g40410;LOC_Os12g26290;LOC_Os06g12310;LOC_Os02g16500;LOC_Os04g56180;LOC_Os02g34600;LOC_Os06g29790;LOC_Os03g48780;LOC_Os01g50820;LOC_Os01g50900;LOC_Os02g01590;LOC_Os08g10310;LOC_Os05g41990;LOC_Os10g39170;LOC_Os12g34524;LOC_Os09g19710;LOC_Os03g43670;LOC_Os03g09940;LOC_Os06g36450;LOC_Os02g56510;LOC_Os04g…
GO:0042538	hyperosmotic salinity response	Biological Process	106	5.20767e-09	3.17735e-12	LOC_Os03g60080;LOC_Os12g37970;LOC_Os01g52780;LOC_Os12g24800;LOC_Os07g48630;LOC_Os01g62760;LOC_Os03g43440;LOC_Os03g44380;LOC_Os06g23684;LOC_Os11g03300;LOC_Os12g03040;LOC_Os12g39400;LOC_Os07g48760;LOC_Os02g47790;LOC_Os12g02200;LOC_Os05g44200;LOC_Os01g63930;LOC_Os03g08460;LOC_Os03g20090;LOC_Os06g14630;LOC_Os12g07030;LOC_Os05g04700;LOC_Os01g47760;LOC_Os03g21060;LOC_Os06g46950;LOC_Os02g58720;LOC_Os03g…
GO:0009751	response to salicylic acid	Biological Process	78	7.28972e-09	4.44766e-12	LOC_Os07g35004;LOC_Os11g02350;LOC_Os05g51630;LOC_Os02g40440;LOC_Os02g42620;LOC_Os04g42950;LOC_Os10g25290;LOC_Os01g45090;LOC_Os04g29680;LOC_Os06g49220;LOC_Os04g40630;LOC_Os04g51040;LOC_Os01g26300;LOC_Os04g42860;LOC_Os08g33660;LOC_Os10g32580;LOC_Os08g02990;LOC_Os07g35630;LOC_Os02g41510;LOC_Os01g60600;LOC_Os05g37060;LOC_Os01g66890;LOC_Os05g44200;LOC_Os06g17490;LOC_Os03g08460;LOC_Os08g36920;LOC_Os01g…
GO:0010167	response to nitrate	Biological Process	77	7.98519e-09	4.87199e-12	LOC_Os08g35760;LOC_Os05g05670;LOC_Os12g01730;LOC_Os12g35610;LOC_Os03g44810;LOC_Os07g18230;LOC_Os06g48030;LOC_Os03g01300;LOC_Os07g42924;LOC_Os09g32964;LOC_Os07g34020;LOC_Os01g74450;LOC_Os06g20150;LOC_Os03g02920;LOC_Os07g48760;LOC_Os04g37990;LOC_Os10g20890;LOC_Os07g01180;LOC_Os07g08350;LOC_Os11g01730;LOC_Os07g01110;LOC_Os12g39220;LOC_Os01g16450;LOC_Os05g05680;LOC_Os01g72460;LOC_Os05g19670;LOC_Os03g…
GO:0016132	brassinosteroid biosynthetic process	Biological Process	47	3.32717e-08	2.03e-11	LOC_Os01g63770;LOC_Os04g55850;LOC_Os08g43120;LOC_Os01g39830;LOC_Os09g08720;LOC_Os06g22060;LOC_Os02g51890;LOC_Os09g31522;LOC_Os05g05680;LOC_Os01g16450;LOC_Os01g42294;LOC_Os04g56230;LOC_Os06g11730;LOC_Os11g37700;LOC_Os05g40200;LOC_Os07g40290;LOC_Os03g02920;LOC_Os06g20150;LOC_Os03g17760;LOC_Os06g39750;LOC_Os08g39270;LOC_Os07g42924;LOC_Os04g41810;LOC_Os02g51750;LOC_Os05g05670;LOC_Os02g12730;LOC_Os06g…
GO:0009651	response to salt stress	Biological Process	208	3.34267e-08	2.03946e-11	LOC_Os06g39230;LOC_Os03g55290;LOC_Os01g46970;LOC_Os07g48680;LOC_Os02g01590;LOC_Os08g44360;LOC_Os06g43600;LOC_Os02g01210;LOC_Os05g40960;LOC_Os04g46830;LOC_Os02g51060;LOC_Os10g38470;LOC_Os07g43950;LOC_Os03g41060;LOC_Os01g64730;LOC_Os04g08350;LOC_Os12g03150;LOC_Os12g10660;LOC_Os06g07220;LOC_Os07g26660;LOC_Os05g25350;LOC_Os03g02740;LOC_Os01g71810;LOC_Os09g37910;LOC_Os01g50420;LOC_Os09g28500;LOC_Os07g…
GO:0000911	cytokinesis by cell plate formation	Biological Process	50	7.44399e-08	4.54179e-11	LOC_Os01g36390;LOC_Os02g10020;LOC_Os04g30720;LOC_Os12g36890;LOC_Os07g32390;LOC_Os03g39020;LOC_Os03g43670;LOC_Os09g25100;LOC_Os05g39850;LOC_Os01g50370;LOC_Os03g52650;LOC_Os03g02290;LOC_Os10g35580;LOC_Os04g15800;LOC_Os02g15810;LOC_Os02g53200;LOC_Os03g40100;LOC_Os01g70560;LOC_Os04g54940;LOC_Os12g16210;LOC_Os05g38480;LOC_Os12g42160;LOC_Os05g33890;LOC_Os03g43440;LOC_Os08g44420;LOC_Os02g50910;LOC_Os01g…
GO:0046685	response to arsenic-containing substance	Biological Process	25	7.70526e-08	4.70119e-11	LOC_Os10g36924;LOC_Os06g41700;LOC_Os01g60770;LOC_Os02g52040;LOC_Os01g04370;LOC_Os01g04380;LOC_Os02g51040;LOC_Os06g30370;LOC_Os03g21820;LOC_Os03g15960;LOC_Os02g52010;LOC_Os06g45710;LOC_Os11g05470;LOC_Os01g11860;LOC_Os06g11660;LOC_Os11g18730;LOC_Os11g19210;LOC_Os02g54140;LOC_Os06g12310;LOC_Os01g04360;LOC_Os04g54810;LOC_Os06g39230;LOC_Os03g16030;LOC_Os02g51620;LOC_Os05g39990
GO:0009873	ethylene-activated signaling pathway	Biological Process	50	1.1335e-07	6.91581e-11	LOC_Os05g04820;LOC_Os08g39840;LOC_Os05g04600;LOC_Os02g43820;LOC_Os04g58810;LOC_Os02g10120;LOC_Os04g46220;LOC_Os09g28440;LOC_Os12g37690;LOC_Os03g20090;LOC_Os01g54890;LOC_Os12g40920;LOC_Os06g14670;LOC_Os01g51260;LOC_Os01g49720;LOC_Os02g36890;LOC_Os02g49986;LOC_Os08g36920;LOC_Os07g48630;LOC_Os11g03440;LOC_Os10g38710;LOC_Os01g49710;LOC_Os08g43600;LOC_Os06g40150;LOC_Os07g14850;LOC_Os12g35610;LOC_Os04g…
GO:0008283	cell proliferation	Biological Process	45	1.21971e-07	7.44181e-11	LOC_Os11g05730;LOC_Os11g01620;LOC_Os05g29010;LOC_Os09g36740;LOC_Os03g11540;LOC_Os01g01170;LOC_Os05g33890;LOC_Os10g28630;LOC_Os01g49200;LOC_Os06g06460;LOC_Os08g44420;LOC_Os02g50910;LOC_Os04g48760;LOC_Os12g36100;LOC_Os02g55410;LOC_Os01g33040;LOC_Os09g37910;LOC_Os08g36570;LOC_Os04g39110;LOC_Os03g06670;LOC_Os02g30800;LOC_Os04g49130;LOC_Os01g16650;LOC_Os12g37400;LOC_Os02g10020;LOC_Os01g36390;LOC_Os04g…
GO:0033106	cis-Golgi network membrane	Cellular Component	8	1.71516e-07	7.72596e-10	LOC_Os01g40094;LOC_Os01g62760;LOC_Os05g46040;LOC_Os05g38290;LOC_Os05g49730;LOC_Os03g16170;LOC_Os09g15670;LOC_Os01g46760
GO:0009738	abscisic acid-activated signaling pathway	Biological Process	70	2.74212e-07	1.67305e-10	LOC_Os02g52780;LOC_Os07g44410;LOC_Os12g37690;LOC_Os05g39240;LOC_Os05g44030;LOC_Os01g09830;LOC_Os05g44210;LOC_Os12g35610;LOC_Os01g58850;LOC_Os04g54930;LOC_Os08g43600;LOC_Os11g37700;LOC_Os05g37250;LOC_Os09g25090;LOC_Os11g42510;LOC_Os05g34830;LOC_Os01g46970;LOC_Os06g07030;LOC_Os01g20860;LOC_Os03g52650;LOC_Os07g48450;LOC_Os03g21710;LOC_Os01g64730;LOC_Os01g08260;LOC_Os02g21340;LOC_Os02g34600;LOC_Os10g…
GO:0009733	response to auxin	Biological Process	90	3.44935e-07	2.10454e-10	LOC_Os08g33660;LOC_Os12g33070;LOC_Os02g52670;LOC_Os01g45090;LOC_Os03g44150;LOC_Os10g25450;LOC_Os04g42950;LOC_Os04g47300;LOC_Os03g42630;LOC_Os06g48160;LOC_Os05g51630;LOC_Os04g52250;LOC_Os09g24810;LOC_Os07g37210;LOC_Os09g23620;LOC_Os02g44320;LOC_Os05g37060;LOC_Os03g21030;LOC_Os03g01320;LOC_Os02g41510;LOC_Os06g39880;LOC_Os09g15670;LOC_Os03g14420;LOC_Os01g10320;LOC_Os06g48180;LOC_Os11g03300;LOC_Os12g…
GO:0010286	heat acclimation	Biological Process	39	6.08298e-07	3.7114e-10	LOC_Os03g21030;LOC_Os05g38530;LOC_Os04g31940;LOC_Os01g12580;LOC_Os07g48450;LOC_Os12g29400;LOC_Os03g53340;LOC_Os04g17100;LOC_Os01g04370;LOC_Os04g39110;LOC_Os03g14180;LOC_Os03g16030;LOC_Os03g21060;LOC_Os03g16920;LOC_Os01g32330;LOC_Os05g34830;LOC_Os04g36750;LOC_Os01g04360;LOC_Os03g15960;LOC_Os06g35960;LOC_Os01g55240;LOC_Os01g41200;LOC_Os01g72530;LOC_Os01g12650;LOC_Os03g42630;LOC_Os09g21710;LOC_Os01g…
GO:0009867	jasmonic acid mediated signaling pathway	Biological Process	83	7.44107e-07	4.54e-10	LOC_Os04g59370;LOC_Os11g07460;LOC_Os01g02600;LOC_Os10g42130;LOC_Os01g08260;LOC_Os02g21340;LOC_Os08g39830;LOC_Os09g21710;LOC_Os02g42380;LOC_Os05g41780;LOC_Os05g34830;LOC_Os01g20860;LOC_Os02g15750;LOC_Os03g08930;LOC_Os03g18960;LOC_Os07g48450;LOC_Os03g52650;LOC_Os01g09100;LOC_Os12g35610;LOC_Os07g14850;LOC_Os06g11330;LOC_Os05g37250;LOC_Os12g07640;LOC_Os11g37700;LOC_Os02g36890;LOC_Os11g42510;LOC_Os05g…
GO:0009664	plant-type cell wall organization	Biological Process	69	1.20119e-06	7.32881e-10	LOC_Os05g41990;LOC_Os05g39990;LOC_Os01g53840;LOC_Os09g27890;LOC_Os07g02200;LOC_Os05g43820;LOC_Os03g21820;LOC_Os03g45210;LOC_Os05g42230;LOC_Os06g48180;LOC_Os01g04230;LOC_Os05g30820;LOC_Os11g10460;LOC_Os08g39590;LOC_Os11g42410;LOC_Os02g51040;LOC_Os06g16300;LOC_Os06g48160;LOC_Os05g51630;LOC_Os01g60330;LOC_Os01g48710;LOC_Os03g10620;LOC_Os01g33080;LOC_Os03g21730;LOC_Os01g39830;LOC_Os08g01530;LOC_Os02g…
GO:0043069	negative regulation of programmed cell death	Biological Process	70	1.29368e-06	7.8931e-10	LOC_Os02g49950;LOC_Os03g21030;LOC_Os03g01320;LOC_Os05g41990;LOC_Os01g53840;LOC_Os09g19710;LOC_Os12g06060;LOC_Os02g06140;LOC_Os04g47300;LOC_Os09g16449;LOC_Os10g25550;LOC_Os03g42630;LOC_Os11g10460;LOC_Os05g10670;LOC_Os04g40410;LOC_Os02g52670;LOC_Os01g64020;LOC_Os06g47600;LOC_Os08g43120;LOC_Os04g55159;LOC_Os03g21060;LOC_Os01g47760;LOC_Os11g45540;LOC_Os01g02370;LOC_Os01g02400;LOC_Os07g40290;LOC_Os12g…
GO:0055114	oxidation-reduction process	Biological Process	170	1.64556e-06	1.004e-09	LOC_Os06g44260;LOC_Os02g04170;LOC_Os02g54254;LOC_Os09g08720;LOC_Os02g42660;LOC_Os03g55380;LOC_Os08g34720;LOC_Os04g53180;LOC_Os07g01110;LOC_Os02g14440;LOC_Os10g33250;LOC_Os02g56920;LOC_Os08g35860;LOC_Os03g57720;LOC_Os06g37150;LOC_Os07g02810;LOC_Os03g39650;LOC_Os12g15530;LOC_Os06g30179;LOC_Os04g45720;LOC_Os09g32964;LOC_Os12g08920;LOC_Os05g26660;LOC_Os09g27820;LOC_Os01g72460;LOC_Os06g46500;LOC_Os04g…
GO:0009739	response to gibberellin	Biological Process	49	2.24814e-06	1.37166e-09	LOC_Os05g39990;LOC_Os05g41780;LOC_Os07g48680;LOC_Os09g23620;LOC_Os07g37210;LOC_Os01g66890;LOC_Os03g55290;LOC_Os09g24810;LOC_Os01g64360;LOC_Os07g40300;LOC_Os03g21820;LOC_Os03g41060;LOC_Os05g37060;LOC_Os02g41510;LOC_Os12g33070;LOC_Os03g63970;LOC_Os08g33660;LOC_Os06g51320;LOC_Os02g34600;LOC_Os12g03150;LOC_Os01g70730;LOC_Os02g51040;LOC_Os02g53530;LOC_Os03g56950;LOC_Os02g42380;LOC_Os05g51630;LOC_Os06g…
GO:0009825	multidimensional cell growth	Biological Process	51	2.28612e-06	1.39483e-09	LOC_Os12g03040;LOC_Os08g34380;LOC_Os08g01330;LOC_Os06g04090;LOC_Os02g43940;LOC_Os03g04770;LOC_Os11g03370;LOC_Os10g36390;LOC_Os07g14850;LOC_Os01g12660;LOC_Os11g03300;LOC_Os08g07890;LOC_Os03g03810;LOC_Os04g54930;LOC_Os06g39750;LOC_Os11g12620;LOC_Os10g32810;LOC_Os07g32660;LOC_Os05g04600;LOC_Os06g01490;LOC_Os02g34970;LOC_Os01g63770;LOC_Os07g41320;LOC_Os03g21060;LOC_Os01g10370;LOC_Os06g46500;LOC_Os02g…
GO:0007030	Golgi organization	Biological Process	53	2.46295e-06	1.50272e-09	LOC_Os05g01810;LOC_Os02g01590;LOC_Os05g34170;LOC_Os03g01530;LOC_Os05g03130;LOC_Os11g02610;LOC_Os02g30910;LOC_Os02g48450;LOC_Os06g14810;LOC_Os02g51060;LOC_Os12g29220;LOC_Os07g26660;LOC_Os04g43390;LOC_Os08g06550;LOC_Os12g10660;LOC_Os02g34600;LOC_Os04g08350;LOC_Os01g34560;LOC_Os03g62090;LOC_Os04g48930;LOC_Os01g44130;LOC_Os01g73980;LOC_Os05g25350;LOC_Os05g04700;LOC_Os02g51890;LOC_Os01g72460;LOC_Os09g…
GO:0042398	cellular modified amino acid biosynthetic process	Biological Process	30	2.6073e-06	1.59079e-09	LOC_Os01g39830;LOC_Os03g06940;LOC_Os02g41510;LOC_Os05g04820;LOC_Os02g01590;LOC_Os01g25560;LOC_Os01g51260;LOC_Os11g07680;LOC_Os09g23620;LOC_Os07g37210;LOC_Os12g37690;LOC_Os05g47540;LOC_Os06g14670;LOC_Os07g08350;LOC_Os04g42950;LOC_Os01g41200;LOC_Os01g25540;LOC_Os12g07640;LOC_Os02g47790;LOC_Os01g74450;LOC_Os02g36890;LOC_Os02g49986;LOC_Os08g33660;LOC_Os12g33070;LOC_Os01g28840;LOC_Os11g03440;LOC_Os02g…
GO:0006598	polyamine catabolic process	Biological Process	30	2.6073e-06	1.59079e-09	LOC_Os02g49986;LOC_Os02g36890;LOC_Os01g74450;LOC_Os02g47790;LOC_Os12g07640;LOC_Os01g25540;LOC_Os01g41200;LOC_Os04g42950;LOC_Os07g08350;LOC_Os12g37970;LOC_Os01g45090;LOC_Os12g03150;LOC_Os11g03440;LOC_Os02g12730;LOC_Os01g28840;LOC_Os12g33070;LOC_Os08g33660;LOC_Os05g04820;LOC_Os02g41510;LOC_Os03g06940;LOC_Os01g39830;LOC_Os06g14670;LOC_Os05g47540;LOC_Os07g37210;LOC_Os12g37690;LOC_Os09g23620;LOC_Os11g…
GO:0004553	hydrolase activity, hydrolyzing O-glycosyl compounds	Molecular Function	48	3.32165e-06	4.18344e-09	LOC_Os08g14700;LOC_Os01g71690;LOC_Os11g19210;LOC_Os10g28120;LOC_Os11g18730;LOC_Os04g53950;LOC_Os03g10478;LOC_Os07g35480;LOC_Os01g16310;LOC_Os07g10840;LOC_Os12g02200;LOC_Os08g13920;LOC_Os06g25010;LOC_Os02g46910;LOC_Os03g57880;LOC_Os01g47510;LOC_Os01g64100;LOC_Os07g35520;LOC_Os06g07600;LOC_Os03g12140;LOC_Os01g10890;LOC_Os06g48180;LOC_Os08g12800;LOC_Os02g53200;LOC_Os10g22520;LOC_Os10g02770;LOC_Os05g…
GO:0046872	metal ion binding	Molecular Function	123	3.40454e-06	4.28783e-09	LOC_Os09g27930;LOC_Os09g31019;LOC_Os03g05210;LOC_Os01g63930;LOC_Os02g14440;LOC_Os08g36680;LOC_Os01g46760;LOC_Os05g05680;LOC_Os05g38290;LOC_Os04g19740;LOC_Os07g32660;LOC_Os05g12040;LOC_Os08g01140;LOC_Os12g01770;LOC_Os03g18640;LOC_Os07g02440;LOC_Os03g08560;LOC_Os07g48830;LOC_Os01g20830;LOC_Os01g06310;LOC_Os10g40960;LOC_Os03g45619;LOC_Os03g09220;LOC_Os10g40660;LOC_Os09g15670;LOC_Os05g49730;LOC_Os07g…
GO:0045893	positive regulation of transcription, DNA-templated	Biological Process	111	4.23003e-06	2.58086e-09	LOC_Os01g09100;LOC_Os12g01560;LOC_Os02g13800;LOC_Os04g54930;LOC_Os04g59120;LOC_Os11g03440;LOC_Os12g07640;LOC_Os02g36890;LOC_Os02g52780;LOC_Os07g42510;LOC_Os12g37690;LOC_Os09g29360;LOC_Os05g04820;LOC_Os03g10210;LOC_Os04g59370;LOC_Os11g07460;LOC_Os08g03560;LOC_Os01g55150;LOC_Os01g64730;LOC_Os12g03150;LOC_Os10g42130;LOC_Os04g55520;LOC_Os02g42380;LOC_Os08g44360;LOC_Os02g04640;LOC_Os05g34830;LOC_Os01g…
GO:0010150	leaf senescence	Biological Process	49	7.09571e-06	4.32929e-09	LOC_Os07g48450;LOC_Os05g40960;LOC_Os09g15670;LOC_Os12g29220;LOC_Os05g49730;LOC_Os01g60600;LOC_Os02g48450;LOC_Os02g30910;LOC_Os03g21030;LOC_Os08g10300;LOC_Os05g34830;LOC_Os02g04640;LOC_Os08g10310;LOC_Os12g29330;LOC_Os03g42630;LOC_Os06g16300;LOC_Os11g02570;LOC_Os02g42620;LOC_Os03g16170;LOC_Os10g42130;LOC_Os12g26290;LOC_Os05g10670;LOC_Os05g38290;LOC_Os01g21420;LOC_Os05g03920;LOC_Os02g34970;LOC_Os04g…
GO:0046686	response to cadmium ion	Biological Process	136	7.27686e-06	4.43981e-09	LOC_Os07g14850;LOC_Os01g12660;LOC_Os10g38710;LOC_Os11g03440;LOC_Os12g07640;LOC_Os02g36890;LOC_Os01g74450;LOC_Os01g49720;LOC_Os01g72460;LOC_Os12g37690;LOC_Os09g37910;LOC_Os10g38360;LOC_Os06g21230;LOC_Os01g13610;LOC_Os05g44070;LOC_Os05g04820;LOC_Os06g22060;LOC_Os02g31030;LOC_Os09g23560;LOC_Os01g16650;LOC_Os02g46460;LOC_Os06g51260;LOC_Os07g26660;LOC_Os04g59370;LOC_Os12g10660;LOC_Os01g11860;LOC_Os04g…
GO:0005618	cell wall	Cellular Component	157	8.80174e-06	3.96475e-08	LOC_Os04g47170;LOC_Os05g43110;LOC_Os05g34170;LOC_Os05g39990;LOC_Os07g47400;LOC_Os05g44600;LOC_Os06g48180;LOC_Os02g48450;LOC_Os03g21820;LOC_Os04g17650;LOC_Os11g10750;LOC_Os06g47600;LOC_Os01g26300;LOC_Os01g71474;LOC_Os02g40900;LOC_Os06g41700;LOC_Os12g06060;LOC_Os11g42410;LOC_Os02g14440;LOC_Os06g14630;LOC_Os09g31522;LOC_Os12g17570;LOC_Os01g33080;LOC_Os08g33710;LOC_Os10g40720;LOC_Os09g08720;LOC_Os01g…
GO:0004091	carboxylic ester hydrolase activity	Molecular Function	23	8.9111e-06	1.1223e-08	LOC_Os10g30290;LOC_Os03g10620;LOC_Os09g28720;LOC_Os02g01140;LOC_Os07g44850;LOC_Os12g17570;LOC_Os01g15039;LOC_Os01g52770;LOC_Os02g57110;LOC_Os03g62740;LOC_Os06g11090;LOC_Os04g42860;LOC_Os09g04710;LOC_Os10g32580;LOC_Os09g28280;LOC_Os11g02570;LOC_Os11g43760;LOC_Os05g44200;LOC_Os02g40440;LOC_Os08g43430;LOC_Os11g13670;LOC_Os01g45460;LOC_Os06g43044
GO:0009740	gibberellic acid mediated signaling pathway	Biological Process	36	1.16888e-05	7.13164e-09	LOC_Os12g40920;LOC_Os11g04720;LOC_Os04g57720;LOC_Os03g20090;LOC_Os12g37690;LOC_Os12g39220;LOC_Os03g01530;LOC_Os01g25500;LOC_Os05g34170;LOC_Os07g44850;LOC_Os06g41060;LOC_Os03g13540;LOC_Os01g72330;LOC_Os11g12620;LOC_Os03g38170;LOC_Os03g51910;LOC_Os01g32770;LOC_Os04g36070;LOC_Os01g72210;LOC_Os08g42470;LOC_Os01g11350;LOC_Os08g43600;LOC_Os02g17780;LOC_Os07g48630;LOC_Os12g37970;LOC_Os06g40150;LOC_Os08g…
GO:0030003	cellular cation homeostasis	Biological Process	33	1.2108e-05	7.38741e-09	LOC_Os09g16449;LOC_Os01g25540;LOC_Os06g45710;LOC_Os11g37700;LOC_Os01g44110;LOC_Os04g56470;LOC_Os01g08260;LOC_Os02g21340;LOC_Os08g35760;LOC_Os10g40600;LOC_Os02g51750;LOC_Os07g26660;LOC_Os02g49480;LOC_Os08g39850;LOC_Os03g43440;LOC_Os01g57370;LOC_Os12g09300;LOC_Os12g29220;LOC_Os12g08090;LOC_Os01g06640;LOC_Os07g26630;LOC_Os02g01210;LOC_Os03g09940;LOC_Os05g44030;LOC_Os03g06520;LOC_Os08g43120;LOC_Os08g…
GO:0006833	water transport	Biological Process	44	1.53888e-05	9.38911e-09	LOC_Os02g48450;LOC_Os04g52310;LOC_Os02g01210;LOC_Os05g01810;LOC_Os05g34170;LOC_Os03g01530;LOC_Os05g03130;LOC_Os04g56470;LOC_Os03g62090;LOC_Os04g48930;LOC_Os01g44130;LOC_Os01g73980;LOC_Os05g25350;LOC_Os12g09300;LOC_Os07g26660;LOC_Os12g10660;LOC_Os02g34600;LOC_Os04g08350;LOC_Os11g05290;LOC_Os03g17790;LOC_Os02g07870;LOC_Os09g08720;LOC_Os12g08090;LOC_Os07g26630;LOC_Os04g19740;LOC_Os05g04700;LOC_Os02g…
GO:0052716	hydroquinone	Molecular Function	11	1.60944e-05	2.027e-08	LOC_Os05g38390;LOC_Os03g16610;LOC_Os01g62600;LOC_Os01g63180;LOC_Os03g18640;LOC_Os12g15530;LOC_Os01g62490;LOC_Os12g01730;LOC_Os07g01110;LOC_Os11g48060;LOC_Os11g01730
GO:0048767	root hair elongation	Biological Process	68	2.43663e-05	1.48666e-08	LOC_Os07g32660;LOC_Os01g39830;LOC_Os05g04600;LOC_Os06g01490;LOC_Os01g63770;LOC_Os11g12620;LOC_Os07g48160;LOC_Os07g26630;LOC_Os04g59540;LOC_Os01g54030;LOC_Os02g53130;LOC_Os07g41320;LOC_Os01g44110;LOC_Os08g07890;LOC_Os03g04770;LOC_Os10g36390;LOC_Os06g14810;LOC_Os05g43820;LOC_Os03g01320;LOC_Os07g02810;LOC_Os08g36500;LOC_Os04g05050;LOC_Os04g52250;LOC_Os01g25560;LOC_Os05g34170;LOC_Os10g41550;LOC_Os01g…
GO:1902039	negative regulation of seed dormancy process	Biological Process	6	2.82117e-05	1.72127e-08	LOC_Os05g49730;LOC_Os05g38290;LOC_Os01g46760;LOC_Os09g15670;LOC_Os01g62760;LOC_Os03g16170
GO:0009269	response to desiccation	Biological Process	31	2.89805e-05	1.76818e-08	LOC_Os12g40890;LOC_Os06g20150;LOC_Os03g07450;LOC_Os01g74450;LOC_Os03g02920;LOC_Os01g52780;LOC_Os06g21250;LOC_Os04g56180;LOC_Os07g26660;LOC_Os02g51750;LOC_Os11g30500;LOC_Os08g39850;LOC_Os12g08920;LOC_Os11g10460;LOC_Os07g26630;LOC_Os02g43330;LOC_Os11g38860;LOC_Os08g36440;LOC_Os01g12580;LOC_Os08g39840;LOC_Os03g55850;LOC_Os02g58720;LOC_Os11g43980;LOC_Os02g10120;LOC_Os10g39170;LOC_Os05g49170;LOC_Os12g…
GO:0010162	seed dormancy process	Biological Process	39	3.08703e-05	1.88348e-08	LOC_Os04g49980;LOC_Os08g42470;LOC_Os05g39250;LOC_Os01g72330;LOC_Os01g10320;LOC_Os04g36070;LOC_Os05g34170;LOC_Os11g04720;LOC_Os04g57720;LOC_Os03g01530;LOC_Os03g43670;LOC_Os03g09170;LOC_Os07g34520;LOC_Os10g40960;LOC_Os01g70930;LOC_Os11g32100;LOC_Os12g42280;LOC_Os06g50900;LOC_Os08g41320;LOC_Os04g32110;LOC_Os11g12620;LOC_Os03g51910;LOC_Os05g46040;LOC_Os06g41060;LOC_Os04g43200;LOC_Os12g07030;LOC_Os12g…
GO:0006857	oligopeptide transport	Biological Process	39	3.75011e-05	2.28805e-08	LOC_Os03g09940;LOC_Os04g52310;LOC_Os02g41510;LOC_Os05g27010;LOC_Os08g38400;LOC_Os05g41780;LOC_Os09g23620;LOC_Os07g37210;LOC_Os04g52090;LOC_Os04g42950;LOC_Os02g42620;LOC_Os05g25260;LOC_Os03g54000;LOC_Os08g33660;LOC_Os02g02460;LOC_Os12g33070;LOC_Os06g13210;LOC_Os12g03150;LOC_Os10g40600;LOC_Os01g45090;LOC_Os03g06520;LOC_Os04g10690;LOC_Os05g04820;LOC_Os01g51260;LOC_Os12g37690;LOC_Os06g14670;LOC_Os08g…
GO:0048646	anatomical structure formation involved in morphogenesis	Biological Process	24	3.93859e-05	2.40304e-08	LOC_Os05g50490;LOC_Os08g14700;LOC_Os03g54910;LOC_Os04g48760;LOC_Os07g29960;LOC_Os02g56540;LOC_Os07g33620;LOC_Os03g45619;LOC_Os09g11440;LOC_Os11g35450;LOC_Os03g21730;LOC_Os03g57880;LOC_Os07g40940;LOC_Os07g35520;LOC_Os03g39020;LOC_Os05g38480;LOC_Os02g47470;LOC_Os07g05190;LOC_Os07g35480;LOC_Os06g02019;LOC_Os07g35560;LOC_Os01g72700;LOC_Os02g05940;LOC_Os08g34320
GO:0020037	heme binding	Molecular Function	68	4.11937e-05	5.18813e-08	LOC_Os01g63540;LOC_Os02g14160;LOC_Os02g36190;LOC_Os07g29960;LOC_Os07g33620;LOC_Os07g48060;LOC_Os04g56180;LOC_Os04g10160;LOC_Os12g26290;LOC_Os05g11130;LOC_Os01g47700;LOC_Os05g05930;LOC_Os11g43980;LOC_Os10g39170;LOC_Os12g34524;LOC_Os06g39780;LOC_Os11g29720;LOC_Os03g02920;LOC_Os06g20150;LOC_Os07g23570;LOC_Os05g37250;LOC_Os02g36110;LOC_Os01g22352;LOC_Os03g25490;LOC_Os01g10850;LOC_Os12g08920;LOC_Os09g…
GO:0009723	response to ethylene	Biological Process	71	5.27888e-05	3.22079e-08	LOC_Os09g21710;LOC_Os10g42130;LOC_Os02g21340;LOC_Os01g08260;LOC_Os12g03150;LOC_Os07g48450;LOC_Os05g37470;LOC_Os03g02290;LOC_Os03g52650;LOC_Os06g07030;LOC_Os05g34830;LOC_Os01g64360;LOC_Os11g42510;LOC_Os04g01470;LOC_Os12g07640;LOC_Os05g37250;LOC_Os09g25090;LOC_Os11g37700;LOC_Os07g15370;LOC_Os11g13670;LOC_Os12g02300;LOC_Os11g03440;LOC_Os12g42160;LOC_Os01g09100;LOC_Os08g38460;LOC_Os11g42800;LOC_Os05g…
GO:0000271	polysaccharide biosynthetic process	Biological Process	39	5.49828e-05	3.35466e-08	LOC_Os01g63580;LOC_Os08g01140;LOC_Os01g34560;LOC_Os07g31500;LOC_Os10g31910;LOC_Os03g54000;LOC_Os12g40890;LOC_Os11g33270;LOC_Os02g06140;LOC_Os06g16300;LOC_Os02g46680;LOC_Os05g34170;LOC_Os10g41550;LOC_Os03g01530;LOC_Os03g18630;LOC_Os07g09050;LOC_Os06g14810;LOC_Os05g37470;LOC_Os04g05050;LOC_Os11g42450;LOC_Os01g55260;LOC_Os07g02810;LOC_Os06g39750;LOC_Os04g54930;LOC_Os08g07890;LOC_Os03g03810;LOC_Os03g…
GO:0006979	response to oxidative stress	Biological Process	66	6.81961e-05	4.16084e-08	LOC_Os03g61670;LOC_Os03g38170;LOC_Os03g04250;LOC_Os12g12470;LOC_Os10g02040;LOC_Os11g10460;LOC_Os07g02440;LOC_Os04g41960;LOC_Os06g40170;LOC_Os03g44150;LOC_Os05g10670;LOC_Os02g58720;LOC_Os03g51459;LOC_Os03g12820;LOC_Os10g38780;LOC_Os02g14440;LOC_Os03g62314;LOC_Os12g02200;LOC_Os04g16740;LOC_Os04g59200;LOC_Os11g45540;LOC_Os02g09740;LOC_Os02g51750;LOC_Os06g48030;LOC_Os12g32640;LOC_Os03g60580;LOC_Os07g…
GO:0010413	glucuronoxylan metabolic process	Biological Process	42	6.89089e-05	4.20433e-08	LOC_Os07g26660;LOC_Os03g16610;LOC_Os01g62600;LOC_Os11g01570;LOC_Os06g43860;LOC_Os12g33070;LOC_Os01g73980;LOC_Os03g62090;LOC_Os01g50900;LOC_Os05g01810;LOC_Os03g44880;LOC_Os08g02070;LOC_Os12g15530;LOC_Os01g18170;LOC_Os05g43820;LOC_Os02g48450;LOC_Os01g62490;LOC_Os03g18120;LOC_Os07g14850;LOC_Os12g01730;LOC_Os12g01560;LOC_Os07g42924;LOC_Os07g34020;LOC_Os01g74450;LOC_Os03g02920;LOC_Os08g01330;LOC_Os06g…
GO:0008017	microtubule binding	Molecular Function	21	7.17396e-05	9.03521e-08	LOC_Os04g54940;LOC_Os05g33890;LOC_Os12g42160;LOC_Os03g50970;LOC_Os05g38480;LOC_Os03g39020;LOC_Os01g33040;LOC_Os07g32390;LOC_Os04g28260;LOC_Os02g18410;LOC_Os02g56540;LOC_Os12g36100;LOC_Os04g30720;LOC_Os01g42070;LOC_Os03g02290;LOC_Os02g50910;LOC_Os08g44420;LOC_Os11g42800;LOC_Os10g35580;LOC_Os01g49200;LOC_Os12g39980
GO:0045492	xylan biosynthetic process	Biological Process	42	8.19621e-05	5.00074e-08	LOC_Os03g18120;LOC_Os07g14850;LOC_Os12g01730;LOC_Os12g01560;LOC_Os07g42924;LOC_Os07g34020;LOC_Os01g74450;LOC_Os03g02920;LOC_Os08g01330;LOC_Os06g04090;LOC_Os03g24930;LOC_Os11g01730;LOC_Os11g48060;LOC_Os03g60300;LOC_Os05g38390;LOC_Os05g19670;LOC_Os01g51260;LOC_Os09g32470;LOC_Os01g72290;LOC_Os07g26630;LOC_Os05g04820;LOC_Os04g34230;LOC_Os07g22580;LOC_Os02g58720;LOC_Os09g28600;LOC_Os01g62600;LOC_Os07g…
GO:0009753	response to jasmonic acid	Biological Process	65	8.9587e-05	5.46595e-08	LOC_Os11g13670;LOC_Os12g07640;LOC_Os01g55240;LOC_Os11g36160;LOC_Os03g60850;LOC_Os04g54930;LOC_Os10g02100;LOC_Os11g03440;LOC_Os02g46460;LOC_Os06g51260;LOC_Os09g23560;LOC_Os05g34010;LOC_Os05g04820;LOC_Os06g41060;LOC_Os01g10370;LOC_Os02g10120;LOC_Os01g57770;LOC_Os04g55520;LOC_Os01g63540;LOC_Os12g24020;LOC_Os10g34230;LOC_Os12g03150;LOC_Os10g40600;LOC_Os06g07030;LOC_Os08g42470;LOC_Os05g27010;LOC_Os02g…
GO:0010103	stomatal complex morphogenesis	Biological Process	38	9.38875e-05	5.72834e-08	LOC_Os10g25450;LOC_Os01g02060;LOC_Os02g16940;LOC_Os02g40440;LOC_Os06g16300;LOC_Os11g32100;LOC_Os10g32580;LOC_Os06g50900;LOC_Os04g42860;LOC_Os03g02750;LOC_Os01g72700;LOC_Os03g55350;LOC_Os01g42900;LOC_Os04g48070;LOC_Os01g50370;LOC_Os03g02290;LOC_Os02g10520;LOC_Os05g04170;LOC_Os11g35400;LOC_Os05g44200;LOC_Os04g48760;LOC_Os04g03050;LOC_Os02g53840;LOC_Os01g50410;LOC_Os07g05740;LOC_Os03g03570;LOC_Os02g…
GO:0051567	histone H3-K9 methylation	Biological Process	39	9.60736e-05	5.86172e-08	LOC_Os10g28630;LOC_Os12g16210;LOC_Os12g42160;LOC_Os01g01170;LOC_Os02g42430;LOC_Os05g33890;LOC_Os09g36740;LOC_Os03g11540;LOC_Os05g29010;LOC_Os02g56540;LOC_Os01g41200;LOC_Os04g48760;LOC_Os08g44420;LOC_Os01g49200;LOC_Os01g09580;LOC_Os10g01570;LOC_Os01g08150;LOC_Os09g37910;LOC_Os02g55410;LOC_Os12g37400;LOC_Os06g22060;LOC_Os01g74146;LOC_Os11g42800;LOC_Os02g30800;LOC_Os07g02780;LOC_Os01g36390;LOC_Os04g…
GO:0009695	jasmonic acid biosynthetic process	Biological Process	39	0.00010525	6.42158e-08	LOC_Os05g44210;LOC_Os07g17970;LOC_Os01g09830;LOC_Os10g41480;LOC_Os08g39840;LOC_Os01g57770;LOC_Os12g37690;LOC_Os03g20090;LOC_Os02g10120;LOC_Os01g47760;LOC_Os01g52260;LOC_Os03g21060;LOC_Os11g42510;LOC_Os12g03040;LOC_Os05g37250;LOC_Os02g47790;LOC_Os01g63930;LOC_Os01g67540;LOC_Os12g37970;LOC_Os03g60080;LOC_Os06g39750;LOC_Os06g23684;LOC_Os10g42800;LOC_Os08g39850;LOC_Os03g43440;LOC_Os07g48450;LOC_Os01g…
GO:0010114	response to red light	Biological Process	35	0.00013478	8.22332e-08	LOC_Os01g64360;LOC_Os04g57720;LOC_Os05g39990;LOC_Os12g19470;LOC_Os06g50400;LOC_Os01g06640;LOC_Os01g60770;LOC_Os05g50350;LOC_Os06g14810;LOC_Os02g15750;LOC_Os03g21820;LOC_Os01g11350;LOC_Os07g05940;LOC_Os01g34560;LOC_Os07g05365;LOC_Os05g49240;LOC_Os02g41460;LOC_Os12g42280;LOC_Os12g17600;LOC_Os03g44380;LOC_Os02g49480;LOC_Os01g22910;LOC_Os01g44390;LOC_Os06g39750;LOC_Os02g47470;LOC_Os02g35180;LOC_Os04g…
GO:0005773	vacuole	Cellular Component	125	0.00023072	1.03928e-06	LOC_Os05g34170;LOC_Os12g36810;LOC_Os07g35630;LOC_Os06g03890;LOC_Os08g36500;LOC_Os11g31980;LOC_Os06g47600;LOC_Os11g10750;LOC_Os08g01140;LOC_Os03g08560;LOC_Os01g71474;LOC_Os03g02040;LOC_Os05g51630;LOC_Os08g39370;LOC_Os04g47300;LOC_Os03g15460;LOC_Os01g10110;LOC_Os01g33080;LOC_Os05g42210;LOC_Os02g53130;LOC_Os08g35860;LOC_Os11g31570;LOC_Os01g21420;LOC_Os07g26630;LOC_Os04g32540;LOC_Os01g57540;LOC_Os05g…
GO:0016126	sterol biosynthetic process	Biological Process	39	0.000277858	1.69529e-07	LOC_Os05g12040;LOC_Os01g39830;LOC_Os08g43120;LOC_Os06g45990;LOC_Os01g63770;LOC_Os06g22060;LOC_Os01g42294;LOC_Os06g11660;LOC_Os05g40200;LOC_Os11g37700;LOC_Os02g52010;LOC_Os04g02050;LOC_Os11g18366;LOC_Os02g51750;LOC_Os01g11340;LOC_Os08g39270;LOC_Os05g11990;LOC_Os06g39750;LOC_Os02g12730;LOC_Os06g14810;LOC_Os03g06940;LOC_Os03g52650;LOC_Os01g32770;LOC_Os05g37470;LOC_Os05g34170;LOC_Os03g01530;LOC_Os11g…
GO:0006629	lipid metabolic process	Biological Process	45	0.000370719	2.26186e-07	LOC_Os03g64170;LOC_Os01g61570;LOC_Os09g36520;LOC_Os06g03890;LOC_Os01g59870;LOC_Os05g43110;LOC_Os02g01140;LOC_Os03g45194;LOC_Os03g38470;LOC_Os04g59330;LOC_Os06g43044;LOC_Os02g40440;LOC_Os06g06250;LOC_Os01g44130;LOC_Os10g32580;LOC_Os04g35100;LOC_Os04g42860;LOC_Os09g04710;LOC_Os08g34720;LOC_Os05g11910;LOC_Os04g39610;LOC_Os02g31030;LOC_Os02g50690;LOC_Os12g17570;LOC_Os11g31940;LOC_Os03g20760;LOC_Os07g…
GO:0009506	plasmodesma	Cellular Component	212	0.000378427	1.70463e-06	LOC_Os11g35400;LOC_Os11g37700;LOC_Os03g25490;LOC_Os07g10840;LOC_Os02g36890;LOC_Os03g54910;LOC_Os12g08920;LOC_Os05g33890;LOC_Os10g02100;LOC_Os03g12140;LOC_Os04g24620;LOC_Os03g63580;LOC_Os03g57880;LOC_Os01g12660;LOC_Os06g21230;LOC_Os05g44070;LOC_Os04g10690;LOC_Os01g08470;LOC_Os06g46500;LOC_Os04g51610;LOC_Os02g45940;LOC_Os06g11660;LOC_Os01g42294;LOC_Os03g18110;LOC_Os02g57840;LOC_Os03g54000;LOC_Os05g…
GO:0010817	regulation of hormone levels	Biological Process	37	0.000395368	2.41225e-07	LOC_Os02g01140;LOC_Os09g25770;LOC_Os10g41550;LOC_Os03g64170;LOC_Os01g61570;LOC_Os03g18630;LOC_Os05g43820;LOC_Os08g38270;LOC_Os07g02810;LOC_Os01g50370;LOC_Os09g04710;LOC_Os01g04230;LOC_Os02g47470;LOC_Os08g01140;LOC_Os07g33620;LOC_Os03g45619;LOC_Os06g43044;LOC_Os07g29960;LOC_Os10g33370;LOC_Os06g16300;LOC_Os02g06140;LOC_Os03g54000;LOC_Os06g46500;LOC_Os06g02019;LOC_Os04g53950;LOC_Os07g32660;LOC_Os06g…
GO:0016762	xyloglucan	Molecular Function	10	0.000418175	5.26668e-07	LOC_Os04g51460;LOC_Os06g48180;LOC_Os10g02770;LOC_Os06g48160;LOC_Os02g46910;LOC_Os03g01800;LOC_Os08g13920;LOC_Os04g53950;LOC_Os03g13570;LOC_Os11g33270
GO:0046982	protein heterodimerization activity	Molecular Function	31	0.000435031	5.47898e-07	LOC_Os08g38300;LOC_Os08g38020;LOC_Os03g06670;LOC_Os02g45940;LOC_Os03g21060;LOC_Os12g40920;LOC_Os08g07740;LOC_Os07g01180;LOC_Os06g06460;LOC_Os12g03040;LOC_Os11g03370;LOC_Os06g11330;LOC_Os11g05730;LOC_Os03g60080;LOC_Os06g06510;LOC_Os04g49420;LOC_Os03g21030;LOC_Os01g64640;LOC_Os01g31800;LOC_Os05g36280;LOC_Os05g02300;LOC_Os07g48450;LOC_Os08g33100;LOC_Os01g46970;LOC_Os05g34830;LOC_Os02g53530;LOC_Os04g…
GO:0005516	calmodulin binding	Molecular Function	42	0.000542219	6.82896e-07	LOC_Os02g06930;LOC_Os01g36790;LOC_Os01g12660;LOC_Os03g43440;LOC_Os01g57370;LOC_Os04g54930;LOC_Os04g56680;LOC_Os05g17604;LOC_Os08g35110;LOC_Os12g02980;LOC_Os04g51610;LOC_Os09g31522;LOC_Os06g04590;LOC_Os11g42800;LOC_Os01g21420;LOC_Os09g08720;LOC_Os05g03920;LOC_Os02g08440;LOC_Os11g07912;LOC_Os01g66510;LOC_Os01g64020;LOC_Os05g50750;LOC_Os09g26590;LOC_Os12g43110;LOC_Os04g40630;LOC_Os02g24700;LOC_Os10g…
GO:0009617	response to bacterium	Biological Process	62	0.000569368	3.47388e-07	LOC_Os07g31500;LOC_Os03g11910;LOC_Os01g71474;LOC_Os01g26300;LOC_Os07g02780;LOC_Os03g42630;LOC_Os06g16300;LOC_Os10g38800;LOC_Os05g33690;LOC_Os08g33100;LOC_Os02g50330;LOC_Os11g01530;LOC_Os08g02990;LOC_Os01g50370;LOC_Os05g38530;LOC_Os08g05290;LOC_Os11g03370;LOC_Os01g71820;LOC_Os12g01530;LOC_Os11g03300;LOC_Os01g50410;LOC_Os12g03040;LOC_Os06g17490;LOC_Os06g04090;LOC_Os07g05190;LOC_Os03g21060;LOC_Os11g…
GO:0008289	lipid binding	Molecular Function	17	0.00057443	7.23464e-07	LOC_Os11g02350;LOC_Os03g01320;LOC_Os06g43600;LOC_Os01g62980;LOC_Os03g15460;LOC_Os02g44320;LOC_Os07g18990;LOC_Os04g33920;LOC_Os12g02320;LOC_Os10g20890;LOC_Os07g07860;LOC_Os11g24070;LOC_Os12g02300;LOC_Os03g01300;LOC_Os05g40010;LOC_Os03g50960;LOC_Os03g02050
GO:0042742	defense response to bacterium	Biological Process	105	0.000580187	3.53988e-07	LOC_Os10g02040;LOC_Os11g30500;LOC_Os08g06550;LOC_Os01g64020;LOC_Os06g49220;LOC_Os03g04250;LOC_Os06g45710;LOC_Os09g39910;LOC_Os03g61740;LOC_Os05g49700;LOC_Os03g38170;LOC_Os01g02750;LOC_Os06g23684;LOC_Os01g52780;LOC_Os04g16740;LOC_Os01g12260;LOC_Os01g47760;LOC_Os03g06670;LOC_Os11g05290;LOC_Os05g07820;LOC_Os11g37950;LOC_Os02g34600;LOC_Os10g40600;LOC_Os01g34560;LOC_Os01g08260;LOC_Os08g39830;LOC_Os07g…
GO:0005506	iron ion binding	Molecular Function	59	0.000662046	8.33812e-07	LOC_Os02g10120;LOC_Os10g38110;LOC_Os03g04530;LOC_Os06g02019;LOC_Os05g49300;LOC_Os07g48330;LOC_Os09g35940;LOC_Os03g25490;LOC_Os02g36110;LOC_Os05g37250;LOC_Os07g23570;LOC_Os01g55240;LOC_Os11g29720;LOC_Os06g39780;LOC_Os03g18030;LOC_Os03g03370;LOC_Os04g10160;LOC_Os05g11130;LOC_Os03g63970;LOC_Os01g63540;LOC_Os05g34854;LOC_Os03g56820;LOC_Os06g44300;LOC_Os07g33620;LOC_Os07g29960;LOC_Os02g36190;LOC_Os10g…
GO:0006084	acetyl-CoA metabolic process	Biological Process	24	0.000690934	4.21558e-07	LOC_Os06g39750;LOC_Os08g39270;LOC_Os05g46350;LOC_Os02g51750;LOC_Os02g12730;LOC_Os01g34560;LOC_Os05g40200;LOC_Os01g60330;LOC_Os07g44370;LOC_Os05g34170;LOC_Os03g01530;LOC_Os01g42294;LOC_Os04g56230;LOC_Os09g37910;LOC_Os01g63770;LOC_Os06g14810;LOC_Os01g39830;LOC_Os02g15810;LOC_Os11g42800;LOC_Os05g37470;LOC_Os06g22060;LOC_Os03g06940;LOC_Os03g52650;LOC_Os03g02290
GO:0009826	unidimensional cell growth	Biological Process	61	0.000879932	5.36871e-07	LOC_Os03g57780;LOC_Os11g01620;LOC_Os02g04540;LOC_Os02g41460;LOC_Os01g70970;LOC_Os03g48710;LOC_Os05g33080;LOC_Os08g40170;LOC_Os02g43640;LOC_Os04g53950;LOC_Os12g33300;LOC_Os02g42650;LOC_Os06g02019;LOC_Os06g50400;LOC_Os01g08470;LOC_Os01g57250;LOC_Os02g28074;LOC_Os05g11130;LOC_Os03g13570;LOC_Os03g63970;LOC_Os11g35860;LOC_Os11g33270;LOC_Os05g34854;LOC_Os07g33620;LOC_Os02g55870;LOC_Os07g29960;LOC_Os09g…
GO:0009832	plant-type cell wall biogenesis	Biological Process	32	0.000909238	5.54752e-07	LOC_Os05g43820;LOC_Os01g62490;LOC_Os08g34020;LOC_Os01g39830;LOC_Os06g14810;LOC_Os01g55260;LOC_Os05g44210;LOC_Os11g12620;LOC_Os03g06940;LOC_Os04g39610;LOC_Os04g19740;LOC_Os05g38390;LOC_Os07g42420;LOC_Os09g30120;LOC_Os02g54820;LOC_Os01g42294;LOC_Os11g01730;LOC_Os05g40200;LOC_Os12g36890;LOC_Os05g51630;LOC_Os01g12260;LOC_Os01g60330;LOC_Os05g50750;LOC_Os08g39270;LOC_Os06g39750;LOC_Os03g16610;LOC_Os01g…
GO:0080167	response to karrikin	Biological Process	53	0.000962598	5.87308e-07	LOC_Os10g38360;LOC_Os02g44770;LOC_Os03g16920;LOC_Os03g10620;LOC_Os01g49720;LOC_Os01g41240;LOC_Os04g45000;LOC_Os05g34010;LOC_Os11g05320;LOC_Os10g38780;LOC_Os04g33740;LOC_Os10g38730;LOC_Os01g17214;LOC_Os10g38710;LOC_Os01g49710;LOC_Os07g48630;LOC_Os11g03440;LOC_Os06g07600;LOC_Os04g45690;LOC_Os05g51220;LOC_Os08g01670;LOC_Os07g10840;LOC_Os01g12650;LOC_Os03g55290;LOC_Os02g01590;LOC_Os08g38400;LOC_Os11g…
GO:0009908	flower development	Biological Process	68	0.00105308	6.42513e-07	LOC_Os06g02019;LOC_Os04g49560;LOC_Os01g16450;LOC_Os01g45700;LOC_Os04g07150;LOC_Os03g22020;LOC_Os11g05320;LOC_Os12g02080;LOC_Os09g23560;LOC_Os08g36440;LOC_Os09g32964;LOC_Os03g12140;LOC_Os01g44390;LOC_Os03g55830;LOC_Os01g10850;LOC_Os08g45060;LOC_Os06g46920;LOC_Os04g45690;LOC_Os11g10560;LOC_Os04g31710;LOC_Os01g64360;LOC_Os03g39020;LOC_Os07g48450;LOC_Os03g63970;LOC_Os06g48500;LOC_Os05g51160;LOC_Os04g…
GO:0071555	cell wall organization	Biological Process	61	0.0011556	7.05063e-07	LOC_Os04g54930;LOC_Os06g39750;LOC_Os07g15370;LOC_Os08g45060;LOC_Os06g46500;LOC_Os02g51890;LOC_Os04g53950;LOC_Os01g50420;LOC_Os10g32810;LOC_Os01g48570;LOC_Os06g43860;LOC_Os01g72700;LOC_Os09g04710;LOC_Os01g34560;LOC_Os11g33270;LOC_Os03g54000;LOC_Os02g01140;LOC_Os06g01972;LOC_Os02g06150;LOC_Os03g01530;LOC_Os05g37470;LOC_Os03g03570;LOC_Os01g33950;LOC_Os03g04770;LOC_Os10g36390;LOC_Os01g36580;LOC_Os01g…
GO:0009834	plant-type secondary cell wall biogenesis	Biological Process	24	0.00146106	8.91436e-07	LOC_Os07g48830;LOC_Os11g03370;LOC_Os10g42130;LOC_Os07g14850;LOC_Os01g36580;LOC_Os03g62090;LOC_Os06g04090;LOC_Os03g18110;LOC_Os11g48060;LOC_Os02g43940;LOC_Os02g52930;LOC_Os08g10080;LOC_Os08g01330;LOC_Os03g42630;LOC_Os12g33300;LOC_Os02g45420;LOC_Os01g51260;LOC_Os03g05530;LOC_Os01g10370;LOC_Os06g01972;LOC_Os07g41320;LOC_Os06g07030;LOC_Os03g21030;LOC_Os01g11810
GO:0006275	regulation of DNA replication	Biological Process	24	0.00146106	8.91436e-07	LOC_Os01g36390;LOC_Os03g11540;LOC_Os09g36740;LOC_Os04g28260;LOC_Os02g10020;LOC_Os07g02780;LOC_Os05g38480;LOC_Os01g01170;LOC_Os05g33890;LOC_Os08g44420;LOC_Os01g49200;LOC_Os12g13950;LOC_Os03g39020;LOC_Os02g55410;LOC_Os07g32390;LOC_Os05g39850;LOC_Os12g04980;LOC_Os09g28580;LOC_Os08g44360;LOC_Os08g36570;LOC_Os03g02290;LOC_Os12g39980;LOC_Os11g42800;LOC_Os02g10490
GO:0016788	hydrolase activity, acting on ester bonds	Molecular Function	34	0.00171879	2.16473e-06	LOC_Os10g32580;LOC_Os11g01830;LOC_Os04g42860;LOC_Os09g04710;LOC_Os06g43044;LOC_Os02g40440;LOC_Os02g52040;LOC_Os06g06250;LOC_Os05g43110;LOC_Os02g01140;LOC_Os03g38470;LOC_Os03g64170;LOC_Os01g61570;LOC_Os06g03890;LOC_Os10g25400;LOC_Os01g57854;LOC_Os01g11660;LOC_Os02g57110;LOC_Os01g52770;LOC_Os02g52010;LOC_Os06g50950;LOC_Os01g46080;LOC_Os05g44200;LOC_Os02g50000;LOC_Os12g01830;LOC_Os12g17570;LOC_Os11g…
GO:0048838	release of seed from dormancy	Biological Process	7	0.00187117	1.14166e-06	LOC_Os01g46760;LOC_Os09g15670;LOC_Os03g16170;LOC_Os05g49730;LOC_Os05g38290;LOC_Os01g62760;LOC_Os02g47470
GO:0009862	systemic acquired resistance, salicylic acid mediated signaling pathway	Biological Process	67	0.00203137	1.23939e-06	LOC_Os12g24020;LOC_Os03g21710;LOC_Os04g59370;LOC_Os11g07460;LOC_Os10g42130;LOC_Os01g02600;LOC_Os01g08260;LOC_Os02g21340;LOC_Os08g39830;LOC_Os02g42380;LOC_Os05g25260;LOC_Os05g34830;LOC_Os03g28330;LOC_Os02g15750;LOC_Os01g20860;LOC_Os03g08930;LOC_Os01g32770;LOC_Os07g48450;LOC_Os03g18960;LOC_Os03g52650;LOC_Os12g35610;LOC_Os06g11330;LOC_Os12g07640;LOC_Os11g37700;LOC_Os02g36890;LOC_Os01g72460;LOC_Os06g…
GO:0007169	transmembrane receptor protein tyrosine kinase signaling pathway	Biological Process	19	0.0021991	1.34173e-06	LOC_Os05g40200;LOC_Os03g18630;LOC_Os08g45060;LOC_Os02g42620;LOC_Os04g48760;LOC_Os11g12620;LOC_Os10g32810;LOC_Os06g16300;LOC_Os04g52780;LOC_Os03g20450;LOC_Os01g48570;LOC_Os01g60330;LOC_Os08g07890;LOC_Os03g03570;LOC_Os01g04230;LOC_Os01g72700;LOC_Os03g04770;LOC_Os01g42294;LOC_Os10g41550
GO:0010102	lateral root morphogenesis	Biological Process	19	0.0021991	1.34173e-06	LOC_Os02g13520;LOC_Os03g55350;LOC_Os04g52250;LOC_Os04g48416;LOC_Os03g01300;LOC_Os02g10520;LOC_Os03g50960;LOC_Os12g40890;LOC_Os03g01320;LOC_Os09g26920;LOC_Os04g46830;LOC_Os03g06290;LOC_Os04g52260;LOC_Os02g44320;LOC_Os10g25450;LOC_Os01g53880;LOC_Os10g20890;LOC_Os11g12530;LOC_Os01g02060
GO:0004601	peroxidase activity	Molecular Function	29	0.00221073	2.78429e-06	LOC_Os03g02920;LOC_Os04g59200;LOC_Os02g06140;LOC_Os06g20150;LOC_Os02g14160;LOC_Os07g48060;LOC_Os01g22352;LOC_Os04g56180;LOC_Os01g10850;LOC_Os12g26290;LOC_Os09g32964;LOC_Os12g08920;LOC_Os10g02040;LOC_Os07g02440;LOC_Os11g10460;LOC_Os02g51750;LOC_Os12g35610;LOC_Os04g59190;LOC_Os06g48030;LOC_Os01g47700;LOC_Os02g58720;LOC_Os11g43980;LOC_Os03g22020;LOC_Os12g02080;LOC_Os02g14440;LOC_Os01g16450;LOC_Os10g…
GO:0031348	negative regulation of defense response	Biological Process	62	0.0027978	1.70702e-06	LOC_Os08g39830;LOC_Os05g25260;LOC_Os02g42380;LOC_Os04g59370;LOC_Os11g07460;LOC_Os03g21710;LOC_Os02g21340;LOC_Os01g08260;LOC_Os01g66510;LOC_Os01g02600;LOC_Os10g42130;LOC_Os03g08930;LOC_Os01g20860;LOC_Os02g15750;LOC_Os03g18960;LOC_Os07g48450;LOC_Os06g48300;LOC_Os05g34830;LOC_Os11g37700;LOC_Os12g07640;LOC_Os02g36890;LOC_Os12g35610;LOC_Os08g03020;LOC_Os06g11330;LOC_Os03g55850;LOC_Os01g09830;LOC_Os01g…
GO:0046274	lignin catabolic process	Biological Process	11	0.00316308	1.92988e-06	LOC_Os11g01730;LOC_Os11g48060;LOC_Os01g62490;LOC_Os03g16610;LOC_Os01g62600;LOC_Os05g38390;LOC_Os07g01110;LOC_Os12g01730;LOC_Os12g15530;LOC_Os01g63180;LOC_Os03g18640
GO:0004674	protein serine/threonine kinase activity	Molecular Function	135	0.00355313	4.47498e-06	LOC_Os01g33950;LOC_Os02g09740;LOC_Os07g29950;LOC_Os03g03570;LOC_Os08g07890;LOC_Os11g10710;LOC_Os05g40200;LOC_Os03g53540;LOC_Os11g45540;LOC_Os05g46760;LOC_Os08g18920;LOC_Os03g62314;LOC_Os05g07820;LOC_Os01g50400;LOC_Os05g33570;LOC_Os05g30820;LOC_Os04g58890;LOC_Os01g60330;LOC_Os03g43670;LOC_Os03g45210;LOC_Os01g23970;LOC_Os11g39450;LOC_Os02g35760;LOC_Os08g34380;LOC_Os01g26270;LOC_Os04g43710;LOC_Os11g…
GO:0010226	response to lithium ion	Biological Process	7	0.00357707	2.18247e-06	LOC_Os01g52770;LOC_Os05g44200;LOC_Os10g32580;LOC_Os02g57110;LOC_Os06g14630;LOC_Os02g40440;LOC_Os04g42860
GO:0016572	histone phosphorylation	Biological Process	19	0.00394408	2.40639e-06	LOC_Os01g41200;LOC_Os02g15810;LOC_Os11g42800;LOC_Os08g40170;LOC_Os10g35580;LOC_Os01g49200;LOC_Os04g15800;LOC_Os03g02290;LOC_Os01g50370;LOC_Os05g33890;LOC_Os08g36570;LOC_Os05g44600;LOC_Os08g44360;LOC_Os04g54940;LOC_Os05g46750;LOC_Os01g52160;LOC_Os07g32390;LOC_Os01g33040;LOC_Os09g37910
GO:0042803	protein homodimerization activity	Molecular Function	40	0.00440102	5.54284e-06	LOC_Os01g53840;LOC_Os10g23090;LOC_Os03g43670;LOC_Os05g43940;LOC_Os02g45170;LOC_Os01g20780;LOC_Os10g33900;LOC_Os04g53860;LOC_Os09g17560;LOC_Os03g01880;LOC_Os05g30820;LOC_Os10g02840;LOC_Os04g43390;LOC_Os05g44340;LOC_Os02g40900;LOC_Os06g36670;LOC_Os11g02570;LOC_Os02g06140;LOC_Os02g32520;LOC_Os12g40920;LOC_Os03g49050;LOC_Os02g51890;LOC_Os09g31522;LOC_Os01g54030;LOC_Os03g49610;LOC_Os09g08720;LOC_Os08g…
GO:0009805	coumarin biosynthetic process	Biological Process	31	0.00457884	2.79368e-06	LOC_Os11g03440;LOC_Os12g03150;LOC_Os01g34560;LOC_Os01g45090;LOC_Os12g37970;LOC_Os08g33660;LOC_Os06g39750;LOC_Os12g33070;LOC_Os02g36890;LOC_Os01g70930;LOC_Os02g49986;LOC_Os06g29790;LOC_Os04g42950;LOC_Os01g41200;LOC_Os12g07640;LOC_Os11g35400;LOC_Os02g47790;LOC_Os05g04170;LOC_Os09g23620;LOC_Os06g14670;LOC_Os07g37210;LOC_Os12g37690;LOC_Os02g01590;LOC_Os01g51260;LOC_Os03g10620;LOC_Os07g49390;LOC_Os02g…
GO:0071497	cellular response to freezing	Biological Process	12	0.00471265	2.87532e-06	LOC_Os07g42510;LOC_Os02g52670;LOC_Os04g46220;LOC_Os12g07030;LOC_Os04g55520;LOC_Os09g28440;LOC_Os02g43820;LOC_Os08g36920;LOC_Os03g08460;LOC_Os06g07030;LOC_Os05g41780;LOC_Os01g10370
GO:0009788	negative regulation of abscisic acid-activated signaling pathway	Biological Process	24	0.00516637	3.15215e-06	LOC_Os01g46760;LOC_Os05g46040;LOC_Os03g20870;LOC_Os08g31580;LOC_Os12g07030;LOC_Os07g42510;LOC_Os04g52090;LOC_Os09g28440;LOC_Os05g34830;LOC_Os05g43820;LOC_Os02g43330;LOC_Os05g49730;LOC_Os09g15670;LOC_Os05g38290;LOC_Os05g49700;LOC_Os02g52670;LOC_Os01g40094;LOC_Os01g62760;LOC_Os03g60080;LOC_Os06g40150;LOC_Os03g16170;LOC_Os02g10760;LOC_Os12g02200;LOC_Os03g07450
GO:2000280	regulation of root development	Biological Process	9	0.00521191	3.17993e-06	LOC_Os07g47450;LOC_Os01g18170;LOC_Os12g39400;LOC_Os03g44880;LOC_Os01g72290;LOC_Os05g19670;LOC_Os05g10830;LOC_Os01g70730;LOC_Os01g50900
GO:0000165	MAPK cascade	Biological Process	57	0.00630293	3.84559e-06	LOC_Os03g42630;LOC_Os04g47300;LOC_Os02g06140;LOC_Os12g33070;LOC_Os07g02780;LOC_Os06g47600;LOC_Os02g52670;LOC_Os01g64020;LOC_Os03g21030;LOC_Os02g49950;LOC_Os02g41510;LOC_Os09g23620;LOC_Os07g37210;LOC_Os02g50330;LOC_Os07g40290;LOC_Os01g02400;LOC_Os12g03040;LOC_Os02g49986;LOC_Os01g02370;LOC_Os08g37180;LOC_Os08g34170;LOC_Os01g02580;LOC_Os01g02750;LOC_Os07g18230;LOC_Os03g60080;LOC_Os07g48630;LOC_Os04g…
GO:0016157	sucrose synthase activity	Molecular Function	5	0.0066877	8.4228e-06	LOC_Os03g22120;LOC_Os04g24430;LOC_Os03g28330;LOC_Os04g17650;LOC_Os02g58480
GO:0005871	kinesin complex	Cellular Component	14	0.00691384	3.11434e-05	LOC_Os03g39020;LOC_Os01g33040;LOC_Os04g28260;LOC_Os05g38480;LOC_Os12g42160;LOC_Os02g50910;LOC_Os08g44420;LOC_Os03g02290;LOC_Os12g39980;LOC_Os11g42800;LOC_Os04g30720;LOC_Os12g36100;LOC_Os02g56540;LOC_Os01g42070
GO:0009741	response to brassinosteroid	Biological Process	31	0.00700058	4.27125e-06	LOC_Os01g43750;LOC_Os02g35329;LOC_Os01g70970;LOC_Os05g30820;LOC_Os12g10660;LOC_Os03g57780;LOC_Os04g51460;LOC_Os03g44150;LOC_Os12g35670;LOC_Os01g43740;LOC_Os07g23570;LOC_Os08g13920;LOC_Os01g25540;LOC_Os02g52010;LOC_Os03g25490;LOC_Os02g52040;LOC_Os06g48160;LOC_Os04g40560;LOC_Os07g40290;LOC_Os08g01330;LOC_Os11g30560;LOC_Os02g05940;LOC_Os01g25560;LOC_Os06g11660;LOC_Os05g32440;LOC_Os03g45720;LOC_Os09g…
GO:0006972	hyperosmotic response	Biological Process	32	0.00742843	4.53229e-06	LOC_Os05g25350;LOC_Os01g73980;LOC_Os01g44130;LOC_Os04g48930;LOC_Os04g08350;LOC_Os02g34600;LOC_Os12g10660;LOC_Os07g26660;LOC_Os02g48450;LOC_Os01g12520;LOC_Os03g01530;LOC_Os05g34170;LOC_Os05g01810;LOC_Os03g17760;LOC_Os01g74450;LOC_Os04g02050;LOC_Os06g03710;LOC_Os01g44360;LOC_Os06g11730;LOC_Os02g54140;LOC_Os06g21250;LOC_Os04g19740;LOC_Os07g26630;LOC_Os09g08720;LOC_Os02g07870;LOC_Os11g05290;LOC_Os01g…
GO:0010193	response to ozone	Biological Process	25	0.00765271	4.66913e-06	LOC_Os05g25350;LOC_Os09g16449;LOC_Os02g40900;LOC_Os11g37700;LOC_Os01g72530;LOC_Os07g08350;LOC_Os11g35400;LOC_Os05g17604;LOC_Os01g08260;LOC_Os02g21340;LOC_Os01g36790;LOC_Os02g06930;LOC_Os01g28840;LOC_Os08g39850;LOC_Os07g46990;LOC_Os05g03920;LOC_Os09g23560;LOC_Os08g39840;LOC_Os08g43120;LOC_Os08g10300;LOC_Os03g28300;LOC_Os01g60600;LOC_Os02g10120;LOC_Os05g04170;LOC_Os08g10310
GO:0009932	cell tip growth	Biological Process	37	0.00794291	4.84619e-06	LOC_Os07g41320;LOC_Os06g46500;LOC_Os04g39610;LOC_Os10g32810;LOC_Os11g12620;LOC_Os04g59540;LOC_Os05g04600;LOC_Os07g32660;LOC_Os01g63770;LOC_Os06g01490;LOC_Os10g36390;LOC_Os03g04770;LOC_Os03g55830;LOC_Os11g37260;LOC_Os03g03810;LOC_Os08g07890;LOC_Os06g39750;LOC_Os04g54930;LOC_Os08g34380;LOC_Os03g01530;LOC_Os10g41550;LOC_Os05g34170;LOC_Os07g02810;LOC_Os04g05050;LOC_Os05g37470;LOC_Os06g14810;LOC_Os01g…
GO:0051707	response to other organism	Biological Process	73	0.00826817	5.04465e-06	LOC_Os11g10710;LOC_Os04g33920;LOC_Os03g20450;LOC_Os10g39970;LOC_Os04g46990;LOC_Os06g03930;LOC_Os05g51220;LOC_Os03g57080;LOC_Os08g39850;LOC_Os01g57370;LOC_Os06g48030;LOC_Os07g34850;LOC_Os09g25570;LOC_Os08g24790;LOC_Os02g34970;LOC_Os05g01140;LOC_Os03g08330;LOC_Os08g39840;LOC_Os02g33680;LOC_Os05g46760;LOC_Os06g46350;LOC_Os03g14654;LOC_Os10g07556;LOC_Os06g20790;LOC_Os03g62090;LOC_Os04g48930;LOC_Os12g…
GO:0000976	transcription regulatory region sequence-specific DNA binding	Molecular Function	8	0.00873647	1.10031e-05	LOC_Os10g26500;LOC_Os06g04870;LOC_Os10g23090;LOC_Os04g45810;LOC_Os04g48070;LOC_Os03g10210;LOC_Os03g07450;LOC_Os02g43330
GO:0010438	cellular response to sulfur starvation	Biological Process	15	0.00923309	5.63337e-06	LOC_Os02g41510;LOC_Os02g36890;LOC_Os05g04820;LOC_Os02g49986;LOC_Os04g42950;LOC_Os12g07640;LOC_Os12g03150;LOC_Os11g03440;LOC_Os09g36740;LOC_Os09g23620;LOC_Os07g37210;LOC_Os06g14670;LOC_Os08g33660;LOC_Os12g33070;LOC_Os01g51260
GO:0016798	hydrolase activity, acting on glycosyl bonds	Molecular Function	13	0.00991806	1.24913e-05	LOC_Os05g37700;LOC_Os12g38910;LOC_Os03g22790;LOC_Os05g50960;LOC_Os05g50490;LOC_Os03g53800;LOC_Os03g13570;LOC_Os08g01940;LOC_Os07g35480;LOC_Os10g28120;LOC_Os03g01800;LOC_Os02g46910;LOC_Os10g02770
GO:0009693	ethylene biosynthetic process	Biological Process	28	0.0100959	6.15981e-06	LOC_Os06g46950;LOC_Os01g06640;LOC_Os09g27820;LOC_Os08g39840;LOC_Os03g05310;LOC_Os01g09830;LOC_Os04g58810;LOC_Os09g27750;LOC_Os02g10120;LOC_Os12g07030;LOC_Os01g54890;LOC_Os04g52090;LOC_Os06g48300;LOC_Os05g05680;LOC_Os01g47760;LOC_Os02g51890;LOC_Os11g45540;LOC_Os03g17760;LOC_Os01g72530;LOC_Os03g08460;LOC_Os06g11730;LOC_Os02g52670;LOC_Os05g05670;LOC_Os08g38460;LOC_Os08g39850;LOC_Os03g43720;LOC_Os08g…
GO:0009415	response to water	Biological Process	6	0.0104409	6.3703e-06	LOC_Os02g44870;LOC_Os11g26760;LOC_Os11g26780;LOC_Os03g45280;LOC_Os11g26570;LOC_Os11g26790
GO:2000762	regulation of phenylpropanoid metabolic process	Biological Process	17	0.0105752	6.45222e-06	LOC_Os12g07640;LOC_Os04g42950;LOC_Os02g49986;LOC_Os05g04820;LOC_Os02g36890;LOC_Os02g41510;LOC_Os01g51260;LOC_Os12g33070;LOC_Os08g33660;LOC_Os12g37970;LOC_Os06g14670;LOC_Os07g37210;LOC_Os12g37690;LOC_Os01g45090;LOC_Os09g23620;LOC_Os11g03440;LOC_Os12g03150
GO:0009939	positive regulation of gibberellic acid mediated signaling pathway	Biological Process	7	0.0108948	6.64724e-06	LOC_Os05g49730;LOC_Os11g13670;LOC_Os01g62760;LOC_Os01g46760;LOC_Os03g16170;LOC_Os05g38290;LOC_Os09g15670
GO:0006469	negative regulation of protein kinase activity	Biological Process	7	0.0108948	6.64724e-06	LOC_Os03g16170;LOC_Os01g46760;LOC_Os01g40094;LOC_Os05g46040;LOC_Os05g49730;LOC_Os09g15670;LOC_Os05g38290
GO:0030968	endoplasmic reticulum unfolded protein response	Biological Process	45	0.0129554	7.90447e-06	LOC_Os03g21030;LOC_Os01g20860;LOC_Os04g47420;LOC_Os02g49950;LOC_Os07g48450;LOC_Os03g52650;LOC_Os01g53840;LOC_Os09g19710;LOC_Os05g34830;LOC_Os08g39830;LOC_Os01g72530;LOC_Os03g42630;LOC_Os05g25260;LOC_Os02g06140;LOC_Os04g47300;LOC_Os10g42130;LOC_Os01g55150;LOC_Os01g64730;LOC_Os01g64020;LOC_Os02g52670;LOC_Os05g10670;LOC_Os01g09830;LOC_Os02g51900;LOC_Os01g48570;LOC_Os02g51910;LOC_Os04g25440;LOC_Os02g…
GO:0006694	steroid biosynthetic process	Biological Process	17	0.0140894	8.59632e-06	LOC_Os02g47470;LOC_Os06g02019;LOC_Os01g04230;LOC_Os11g01620;LOC_Os02g04760;LOC_Os05g47540;LOC_Os03g18630;LOC_Os04g46130;LOC_Os07g02200;LOC_Os03g45619;LOC_Os10g33370;LOC_Os07g29960;LOC_Os09g25700;LOC_Os04g53860;LOC_Os08g38270;LOC_Os09g08720;LOC_Os09g25690
GO:0080086	stamen filament development	Biological Process	12	0.0146971	8.96712e-06	LOC_Os02g10120;LOC_Os12g37970;LOC_Os03g01800;LOC_Os12g37690;LOC_Os02g46910;LOC_Os03g20090;LOC_Os01g45090;LOC_Os10g02770;LOC_Os04g42950;LOC_Os03g13570;LOC_Os08g39840;LOC_Os08g39850
GO:0010224	response to UV-B	Biological Process	38	0.0156775	9.56526e-06	LOC_Os03g10620;LOC_Os01g51260;LOC_Os12g37690;LOC_Os03g20090;LOC_Os06g14670;LOC_Os05g04820;LOC_Os03g14050;LOC_Os11g03440;LOC_Os12g37970;LOC_Os03g11540;LOC_Os03g57780;LOC_Os04g49210;LOC_Os03g12530;LOC_Os12g07640;LOC_Os12g43490;LOC_Os02g49986;LOC_Os02g36890;LOC_Os02g11700;LOC_Os07g37210;LOC_Os01g45140;LOC_Os09g23620;LOC_Os10g05600;LOC_Os06g01620;LOC_Os01g11350;LOC_Os02g41510;LOC_Os05g08480;LOC_Os08g…
GO:0007018	microtubule-based movement	Biological Process	16	0.0160667	9.80276e-06	LOC_Os12g39980;LOC_Os11g42800;LOC_Os03g02290;LOC_Os02g50910;LOC_Os08g44420;LOC_Os01g42070;LOC_Os04g30720;LOC_Os02g56540;LOC_Os12g36100;LOC_Os03g01530;LOC_Os04g28260;LOC_Os03g39020;LOC_Os01g33040;LOC_Os12g42160;LOC_Os05g38480;LOC_Os05g34170
GO:0005874	microtubule	Cellular Component	19	0.0172548	7.77245e-05	LOC_Os05g38480;LOC_Os12g42160;LOC_Os05g34170;LOC_Os04g28260;LOC_Os03g01530;LOC_Os07g32390;LOC_Os01g33040;LOC_Os03g39020;LOC_Os01g42070;LOC_Os04g30720;LOC_Os12g36100;LOC_Os02g56540;LOC_Os12g39980;LOC_Os01g09580;LOC_Os11g42800;LOC_Os03g11400;LOC_Os08g44420;LOC_Os02g50910;LOC_Os03g02290
GO:0009685	gibberellin metabolic process	Biological Process	8	0.0178682	1.09019e-05	LOC_Os05g34854;LOC_Os11g28530;LOC_Os02g41954;LOC_Os02g36264;LOC_Os01g08220;LOC_Os07g01340;LOC_Os02g08440;LOC_Os04g09900
GO:0045892	negative regulation of transcription, DNA-templated	Biological Process	46	0.0184837	1.12774e-05	LOC_Os05g41780;LOC_Os03g41390;LOC_Os07g37210;LOC_Os04g52090;LOC_Os09g23620;LOC_Os09g24810;LOC_Os07g40300;LOC_Os01g61900;LOC_Os05g37060;LOC_Os02g41510;LOC_Os12g33070;LOC_Os03g21710;LOC_Os08g33660;LOC_Os06g43860;LOC_Os03g47730;LOC_Os01g45090;LOC_Os01g55150;LOC_Os12g03150;LOC_Os01g62190;LOC_Os04g42950;LOC_Os06g29790;LOC_Os10g32900;LOC_Os05g25260;LOC_Os03g13540;LOC_Os01g51260;LOC_Os12g37690;LOC_Os06g…
GO:0005975	carbohydrate metabolic process	Biological Process	65	0.0192759	1.17607e-05	LOC_Os10g07290;LOC_Os02g46910;LOC_Os01g47510;LOC_Os01g71820;LOC_Os01g05840;LOC_Os05g50960;LOC_Os07g35480;LOC_Os07g38790;LOC_Os03g28300;LOC_Os01g39830;LOC_Os03g49610;LOC_Os08g14700;LOC_Os07g35560;LOC_Os03g51240;LOC_Os01g71474;LOC_Os04g43390;LOC_Os09g36280;LOC_Os01g19170;LOC_Os06g24990;LOC_Os01g59840;LOC_Os02g51620;LOC_Os12g36810;LOC_Os01g71280;LOC_Os10g22520;LOC_Os09g32670;LOC_Os03g12140;LOC_Os03g…
GO:0042744	hydrogen peroxide catabolic process	Biological Process	27	0.0203673	1.24267e-05	LOC_Os04g19740;LOC_Os02g43330;LOC_Os03g06940;LOC_Os01g39830;LOC_Os03g05310;LOC_Os12g02080;LOC_Os11g43980;LOC_Os02g48450;LOC_Os05g01810;LOC_Os05g41990;LOC_Os07g02140;LOC_Os01g73980;LOC_Os03g07450;LOC_Os12g06060;LOC_Os06g45710;LOC_Os07g02120;LOC_Os02g47790;LOC_Os02g32520;LOC_Os07g02100;LOC_Os04g08350;LOC_Os01g57854;LOC_Os02g12730;LOC_Os02g34600;LOC_Os01g21034;LOC_Os05g44340;LOC_Os12g35610;LOC_Os06g…
GO:0005507	copper ion binding	Molecular Function	52	0.0220525	2.77739e-05	LOC_Os07g01110;LOC_Os01g63180;LOC_Os06g46950;LOC_Os06g01490;LOC_Os07g32660;LOC_Os01g57690;LOC_Os12g01730;LOC_Os06g21250;LOC_Os10g36390;LOC_Os02g51750;LOC_Os12g17600;LOC_Os06g46740;LOC_Os03g17760;LOC_Os06g11730;LOC_Os04g16740;LOC_Os03g61740;LOC_Os12g38051;LOC_Os12g15530;LOC_Os02g21090;LOC_Os03g15340;LOC_Os07g02810;LOC_Os09g27750;LOC_Os07g02200;LOC_Os03g64340;LOC_Os01g57880;LOC_Os03g18640;LOC_Os03g…
GO:0009809	lignin biosynthetic process	Biological Process	30	0.0240913	1.46988e-05	LOC_Os09g23560;LOC_Os09g08720;LOC_Os03g49610;LOC_Os04g53860;LOC_Os02g58720;LOC_Os03g22020;LOC_Os01g62490;LOC_Os06g21230;LOC_Os01g16450;LOC_Os01g20780;LOC_Os02g51890;LOC_Os05g38390;LOC_Os09g31522;LOC_Os08g01330;LOC_Os01g18860;LOC_Os03g56820;LOC_Os02g40900;LOC_Os04g59200;LOC_Os04g01470;LOC_Os03g17760;LOC_Os11g01730;LOC_Os11g48060;LOC_Os06g11730;LOC_Os01g22352;LOC_Os06g04090;LOC_Os07g48060;LOC_Os12g…
GO:0000786	nucleosome	Cellular Component	16	0.0245476	0.000110575	LOC_Os08g33100;LOC_Os07g08710;LOC_Os12g41910;LOC_Os11g05730;LOC_Os03g06670;LOC_Os02g45940;LOC_Os01g31800;LOC_Os05g36280;LOC_Os05g02300;LOC_Os06g06460;LOC_Os03g17100;LOC_Os06g06510;LOC_Os04g34240;LOC_Os04g49420;LOC_Os08g38300;LOC_Os01g64640
GO:0009408	response to heat	Biological Process	53	0.0255818	1.56082e-05	LOC_Os01g46760;LOC_Os10g07200;LOC_Os05g41490;LOC_Os05g38290;LOC_Os06g40150;LOC_Os02g51750;LOC_Os05g11990;LOC_Os03g20120;LOC_Os04g37990;LOC_Os06g35960;LOC_Os04g36750;LOC_Os03g61740;LOC_Os08g35160;LOC_Os03g16030;LOC_Os01g43590;LOC_Os05g49730;LOC_Os09g15670;LOC_Os01g55260;LOC_Os06g48180;LOC_Os10g07210;LOC_Os03g61670;LOC_Os01g42960;LOC_Os03g44150;LOC_Os07g48830;LOC_Os06g51320;LOC_Os05g50750;LOC_Os06g…
GO:0010205	photoinhibition	Biological Process	9	0.0266916	1.62853e-05	LOC_Os01g46760;LOC_Os03g16170;LOC_Os05g49730;LOC_Os05g46040;LOC_Os01g40094;LOC_Os09g15670;LOC_Os05g50750;LOC_Os05g38290;LOC_Os06g12370
GO:0006869	lipid transport	Biological Process	23	0.0305784	1.86567e-05	LOC_Os10g20890;LOC_Os11g02350;LOC_Os10g02100;LOC_Os03g01300;LOC_Os12g12934;LOC_Os03g02390;LOC_Os08g06550;LOC_Os11g24070;LOC_Os01g12660;LOC_Os12g02300;LOC_Os06g49220;LOC_Os01g62980;LOC_Os02g44320;LOC_Os12g02320;LOC_Os05g34010;LOC_Os01g55260;LOC_Os07g48160;LOC_Os03g01320;LOC_Os06g43600;LOC_Os05g40010;LOC_Os03g50960;LOC_Os03g37960;LOC_Os07g07860
GO:0042127	regulation of cell proliferation	Biological Process	23	0.0305784	1.86567e-05	LOC_Os07g32390;LOC_Os07g37810;LOC_Os04g48416;LOC_Os02g10520;LOC_Os03g02290;LOC_Os09g29360;LOC_Os09g26920;LOC_Os11g42800;LOC_Os01g74146;LOC_Os04g15800;LOC_Os02g15810;LOC_Os02g53200;LOC_Os07g40300;LOC_Os03g55350;LOC_Os03g02750;LOC_Os02g09740;LOC_Os02g53840;LOC_Os09g02360;LOC_Os12g36890;LOC_Os10g25450;LOC_Os07g01180;LOC_Os04g03050;LOC_Os02g16940
GO:0009860	pollen tube growth	Biological Process	63	0.0331036	2.01974e-05	LOC_Os05g27010;LOC_Os05g04710;LOC_Os03g52650;LOC_Os04g52320;LOC_Os03g11600;LOC_Os08g42470;LOC_Os04g31940;LOC_Os03g30150;LOC_Os10g36650;LOC_Os06g48300;LOC_Os05g25350;LOC_Os05g15850;LOC_Os10g40600;LOC_Os01g66510;LOC_Os07g07990;LOC_Os02g46460;LOC_Os05g44070;LOC_Os02g03750;LOC_Os05g34010;LOC_Os05g49300;LOC_Os11g05320;LOC_Os04g33740;LOC_Os05g44030;LOC_Os04g55850;LOC_Os12g06660;LOC_Os06g41060;LOC_Os01g…
GO:0071704	organic substance metabolic process	Biological Process	65	0.0333055	2.03206e-05	LOC_Os02g40260;LOC_Os12g42910;LOC_Os03g02750;LOC_Os02g43280;LOC_Os02g33380;LOC_Os02g32580;LOC_Os02g18450;LOC_Os01g72210;LOC_Os05g05930;LOC_Os03g24730;LOC_Os01g11010;LOC_Os06g50950;LOC_Os10g05990;LOC_Os10g06000;LOC_Os08g26840;LOC_Os02g44820;LOC_Os04g20400;LOC_Os01g15039;LOC_Os01g11660;LOC_Os03g62740;LOC_Os01g26270;LOC_Os02g51900;LOC_Os04g44354;LOC_Os02g54190;LOC_Os09g18230;LOC_Os04g25440;LOC_Os04g…
GO:0009407	toxin catabolic process	Biological Process	39	0.0347223	2.1185e-05	LOC_Os10g38780;LOC_Os05g04600;LOC_Os10g38730;LOC_Os02g43560;LOC_Os09g23560;LOC_Os07g44410;LOC_Os01g49720;LOC_Os10g38360;LOC_Os01g20206;LOC_Os07g42510;LOC_Os04g46220;LOC_Os12g07030;LOC_Os09g28440;LOC_Os12g37690;LOC_Os03g20090;LOC_Os03g08460;LOC_Os02g45620;LOC_Os08g36920;LOC_Os06g35960;LOC_Os01g09100;LOC_Os02g13800;LOC_Os04g54930;LOC_Os01g11340;LOC_Os10g38710;LOC_Os01g49710;LOC_Os04g53930;LOC_Os12g…
GO:0045471	response to ethanol	Biological Process	6	0.0354987	2.16587e-05	LOC_Os01g04370;LOC_Os02g54140;LOC_Os03g16030;LOC_Os01g04380;LOC_Os01g04360;LOC_Os03g15960
GO:0044765	single-organism transport	Biological Process	62	0.0358379	2.18657e-05	LOC_Os07g42510;LOC_Os02g54190;LOC_Os03g45760;LOC_Os06g21230;LOC_Os11g01620;LOC_Os03g57780;LOC_Os02g05970;LOC_Os03g55830;LOC_Os08g03020;LOC_Os01g70970;LOC_Os01g09580;LOC_Os04g45690;LOC_Os05g03760;LOC_Os05g45090;LOC_Os06g50950;LOC_Os08g45060;LOC_Os04g48290;LOC_Os11g13670;LOC_Os08g32060;LOC_Os09g25770;LOC_Os02g06150;LOC_Os02g05940;LOC_Os03g08520;LOC_Os08g38270;LOC_Os09g37050;LOC_Os02g58390;LOC_Os01g…
GO:0010119	regulation of stomatal movement	Biological Process	34	0.0362366	2.2109e-05	LOC_Os01g40094;LOC_Os01g62760;LOC_Os06g21250;LOC_Os12g35610;LOC_Os03g48310;LOC_Os03g17760;LOC_Os06g11730;LOC_Os05g46040;LOC_Os09g31522;LOC_Os01g46760;LOC_Os02g51890;LOC_Os06g50400;LOC_Os01g45274;LOC_Os09g08720;LOC_Os05g38290;LOC_Os01g60770;LOC_Os11g05320;LOC_Os06g21230;LOC_Os10g40600;LOC_Os02g34600;LOC_Os03g08560;LOC_Os04g47300;LOC_Os06g41700;LOC_Os03g16170;LOC_Os02g51040;LOC_Os02g04640;LOC_Os05g…
GO:0043565	sequence-specific DNA binding	Molecular Function	51	0.0368575	4.642e-05	LOC_Os01g64020;LOC_Os01g62190;LOC_Os03g12860;LOC_Os02g10760;LOC_Os05g48650;LOC_Os03g09170;LOC_Os10g23090;LOC_Os06g04850;LOC_Os05g02150;LOC_Os05g49700;LOC_Os01g10320;LOC_Os11g04380;LOC_Os03g59460;LOC_Os01g43590;LOC_Os01g60600;LOC_Os05g37060;LOC_Os06g40150;LOC_Os11g05640;LOC_Os12g39400;LOC_Os06g35960;LOC_Os02g43940;LOC_Os06g04090;LOC_Os12g40920;LOC_Os02g45420;LOC_Os02g08440;LOC_Os03g47730;LOC_Os01g…
GO:0009620	response to fungus	Biological Process	37	0.0391483	2.38855e-05	LOC_Os04g46220;LOC_Os02g10120;LOC_Os03g60300;LOC_Os03g20090;LOC_Os12g37690;LOC_Os11g35240;LOC_Os01g52260;LOC_Os04g43200;LOC_Os01g11810;LOC_Os05g44210;LOC_Os09g27820;LOC_Os10g41480;LOC_Os05g44030;LOC_Os08g39840;LOC_Os02g08440;LOC_Os03g28300;LOC_Os11g03370;LOC_Os12g37970;LOC_Os11g03300;LOC_Os08g39850;LOC_Os06g23684;LOC_Os09g38910;LOC_Os11g42510;LOC_Os01g63930;LOC_Os05g37250;LOC_Os03g45720;LOC_Os03g…
GO:0008361	regulation of cell size	Biological Process	27	0.0397645	2.42614e-05	LOC_Os12g40890;LOC_Os11g33270;LOC_Os02g46680;LOC_Os12g03040;LOC_Os02g42380;LOC_Os01g60330;LOC_Os05g40200;LOC_Os07g01180;LOC_Os10g31910;LOC_Os11g03370;LOC_Os03g60080;LOC_Os03g03810;LOC_Os11g03300;LOC_Os11g07460;LOC_Os01g63580;LOC_Os04g54930;LOC_Os11g12620;LOC_Os01g74146;LOC_Os07g48450;LOC_Os05g37470;LOC_Os04g05050;LOC_Os05g04600;LOC_Os01g63770;LOC_Os07g40300;LOC_Os01g42294;LOC_Os07g41320;LOC_Os05g…
GO:0009749	response to glucose	Biological Process	24	0.0451023	2.75182e-05	LOC_Os03g55290;LOC_Os12g07030;LOC_Os07g42510;LOC_Os05g39240;LOC_Os09g28440;LOC_Os04g52090;LOC_Os08g02120;LOC_Os08g31580;LOC_Os05g49700;LOC_Os06g22060;LOC_Os03g12290;LOC_Os08g43120;LOC_Os11g44810;LOC_Os02g15750;LOC_Os03g55850;LOC_Os02g21340;LOC_Os01g08260;LOC_Os02g52670;LOC_Os08g01140;LOC_Os06g40150;LOC_Os07g48760;LOC_Os02g10760;LOC_Os06g45710;LOC_Os11g37700
GO:0009698	phenylpropanoid metabolic process	Biological Process	18	0.048058	2.93215e-05	LOC_Os02g28220;LOC_Os04g17100;LOC_Os03g06940;LOC_Os01g74450;LOC_Os01g53330;LOC_Os07g08350;LOC_Os01g39830;LOC_Os01g25540;LOC_Os08g02030;LOC_Os01g52160;LOC_Os05g47540;LOC_Os02g12730;LOC_Os11g07680;LOC_Os05g37660;LOC_Os01g28840;LOC_Os10g18820;LOC_Os03g04130;LOC_Os01g25560
GO:0030145	manganese ion binding	Molecular Function	12	0.0485419	6.11359e-05	LOC_Os03g48780;LOC_Os05g10830;LOC_Os01g18170;LOC_Os03g44880;LOC_Os01g72290;LOC_Os08g13440;LOC_Os08g08980;LOC_Os08g08960;LOC_Os05g19670;LOC_Os08g08970;LOC_Os01g50900;LOC_Os08g35760
GO:0010033	response to organic substance	Biological Process	66	0.0498027	3.03861e-05	LOC_Os06g07300;LOC_Os03g04250;LOC_Os11g26790;LOC_Os02g52930;LOC_Os10g05490;LOC_Os11g07912;LOC_Os07g32680;LOC_Os08g39590;LOC_Os08g39240;LOC_Os07g07410;LOC_Os02g44670;LOC_Os06g02780;LOC_Os02g21090;LOC_Os01g43590;LOC_Os07g37230;LOC_Os04g41350;LOC_Os03g38470;LOC_Os04g20680;LOC_Os01g45140;LOC_Os02g56540;LOC_Os11g26780;LOC_Os12g43490;LOC_Os05g38480;LOC_Os10g37110;LOC_Os07g34850;LOC_Os04g12060;LOC_Os04g…
GO:0044710	single-organism metabolic process	Biological Process	70	0.0503006	3.06898e-05	LOC_Os01g71170;LOC_Os03g14654;LOC_Os03g57950;LOC_Os08g36680;LOC_Os02g51910;LOC_Os09g26920;LOC_Os01g51890;LOC_Os02g08440;LOC_Os02g43820;LOC_Os01g62760;LOC_Os06g11090;LOC_Os05g46350;LOC_Os09g28280;LOC_Os07g32010;LOC_Os10g39970;LOC_Os04g51660;LOC_Os02g56540;LOC_Os06g02780;LOC_Os06g03890;LOC_Os04g45720;LOC_Os01g61570;LOC_Os06g10420;LOC_Os04g29680;LOC_Os04g28520;LOC_Os08g39240;LOC_Os08g39590;LOC_Os12g…
GO:0000226	microtubule cytoskeleton organization	Biological Process	31	0.0550842	3.36084e-05	LOC_Os11g05320;LOC_Os01g50400;LOC_Os01g42070;LOC_Os03g07810;LOC_Os01g16650;LOC_Os03g56070;LOC_Os05g46750;LOC_Os09g16950;LOC_Os01g08150;LOC_Os06g03710;LOC_Os02g56540;LOC_Os04g48760;LOC_Os06g17490;LOC_Os08g44420;LOC_Os01g09580;LOC_Os12g16210;LOC_Os12g42160;LOC_Os11g01620;LOC_Os03g18630;LOC_Os02g15810;LOC_Os02g53200;LOC_Os05g43820;LOC_Os03g11400;LOC_Os01g50370;LOC_Os03g02290;LOC_Os04g15800;LOC_Os03g…
GO:0006270	DNA replication initiation	Biological Process	16	0.056045	3.41946e-05	LOC_Os01g36390;LOC_Os04g28260;LOC_Os09g36740;LOC_Os03g11540;LOC_Os02g10020;LOC_Os12g13950;LOC_Os02g55410;LOC_Os03g39020;LOC_Os07g32390;LOC_Os01g01170;LOC_Os08g36570;LOC_Os07g02780;LOC_Os05g39850;LOC_Os12g39980;LOC_Os12g37400;LOC_Os08g44420
GO:0010029	regulation of seed germination	Biological Process	20	0.0584116	3.56386e-05	LOC_Os02g42380;LOC_Os06g36670;LOC_Os12g04500;LOC_Os03g17760;LOC_Os06g03710;LOC_Os03g56950;LOC_Os02g34600;LOC_Os03g18600;LOC_Os01g40094;LOC_Os02g49480;LOC_Os02g35180;LOC_Os01g58850;LOC_Os05g40960;LOC_Os04g36070;LOC_Os01g72330;LOC_Os09g21120;LOC_Os04g57720;LOC_Os11g04720;LOC_Os05g41490;LOC_Os05g46040
GO:0003777	microtubule motor activity	Molecular Function	11	0.0617632	7.77874e-05	LOC_Os02g56540;LOC_Os12g36100;LOC_Os04g30720;LOC_Os01g42070;LOC_Os05g38480;LOC_Os01g33040;LOC_Os03g39020;LOC_Os08g44420;LOC_Os02g50910;LOC_Os11g42800;LOC_Os12g39980
GO:0007389	pattern specification process	Biological Process	32	0.062992	3.84332e-05	LOC_Os01g42294;LOC_Os03g22040;LOC_Os07g05190;LOC_Os01g42070;LOC_Os01g63770;LOC_Os02g05970;LOC_Os02g13520;LOC_Os03g57780;LOC_Os11g01620;LOC_Os03g03810;LOC_Os05g38480;LOC_Os05g33890;LOC_Os01g49200;LOC_Os05g40200;LOC_Os02g56540;LOC_Os02g06150;LOC_Os06g49100;LOC_Os03g50970;LOC_Os04g05050;LOC_Os11g42450;LOC_Os03g18630;LOC_Os07g31500;LOC_Os02g58390;LOC_Os01g04230;LOC_Os01g63580;LOC_Os11g33270;LOC_Os12g…
GO:0009725	response to hormone	Biological Process	55	0.0644715	3.93359e-05	LOC_Os06g02900;LOC_Os04g45690;LOC_Os04g48290;LOC_Os11g01620;LOC_Os07g28890;LOC_Os02g05970;LOC_Os08g03020;LOC_Os01g23970;LOC_Os01g48446;LOC_Os12g12934;LOC_Os04g43710;LOC_Os12g39320;LOC_Os03g60560;LOC_Os03g04530;LOC_Os12g35350;LOC_Os10g38110;LOC_Os07g42250;LOC_Os05g51670;LOC_Os02g40260;LOC_Os03g47730;LOC_Os11g35450;LOC_Os06g13210;LOC_Os01g09640;LOC_Os02g08320;LOC_Os01g72700;LOC_Os01g72210;LOC_Os01g…
GO:0002679	respiratory burst involved in defense response	Biological Process	38	0.0820404	5.00551e-05	LOC_Os06g07030;LOC_Os11g43980;LOC_Os03g52650;LOC_Os05g41990;LOC_Os05g41780;LOC_Os06g45580;LOC_Os03g09170;LOC_Os01g53840;LOC_Os04g52090;LOC_Os02g06140;LOC_Os11g47870;LOC_Os10g25550;LOC_Os04g59370;LOC_Os11g10460;LOC_Os05g10670;LOC_Os02g52670;LOC_Os06g47600;LOC_Os04g33740;LOC_Os04g58810;LOC_Os03g55850;LOC_Os01g48570;LOC_Os04g51610;LOC_Os07g42510;LOC_Os04g46220;LOC_Os12g07030;LOC_Os09g28440;LOC_Os01g…
GO:0003993	acid phosphatase activity	Molecular Function	14	0.0826534	0.000104097	LOC_Os05g09724;LOC_Os03g60370;LOC_Os01g47580;LOC_Os05g09704;LOC_Os05g09740;LOC_Os12g40890;LOC_Os11g05410;LOC_Os07g02120;LOC_Os05g10210;LOC_Os05g10330;LOC_Os05g10370;LOC_Os07g02100;LOC_Os01g58640;LOC_Os03g13540
GO:0009963	positive regulation of flavonoid biosynthetic process	Biological Process	30	0.0834784	5.09325e-05	LOC_Os07g28890;LOC_Os01g21034;LOC_Os03g43440;LOC_Os08g07890;LOC_Os04g02050;LOC_Os12g04500;LOC_Os01g46080;LOC_Os01g41200;LOC_Os11g37700;LOC_Os01g12650;LOC_Os01g57770;LOC_Os04g51610;LOC_Os11g42800;LOC_Os01g54030;LOC_Os09g32470;LOC_Os12g08090;LOC_Os08g43120;LOC_Os02g21340;LOC_Os01g08260;LOC_Os12g09300;LOC_Os05g42180;LOC_Os09g16449;LOC_Os04g56470;LOC_Os11g04720;LOC_Os04g57720;LOC_Os02g01210;LOC_Os06g…
GO:0010389	regulation of G2/M transition of mitotic cell cycle	Biological Process	15	0.0870471	5.31099e-05	LOC_Os02g10490;LOC_Os01g49200;LOC_Os12g39980;LOC_Os11g42800;LOC_Os08g40170;LOC_Os03g02290;LOC_Os09g28580;LOC_Os05g38480;LOC_Os08g36570;LOC_Os05g33890;LOC_Os04g28260;LOC_Os03g11540;LOC_Os12g13950;LOC_Os02g55410;LOC_Os07g32390
GO:0005615	extracellular space	Cellular Component	13	0.0877905	0.000395453	LOC_Os04g32540;LOC_Os05g44200;LOC_Os01g22980;LOC_Os11g31980;LOC_Os08g06550;LOC_Os08g35860;LOC_Os01g71310;LOC_Os01g61690;LOC_Os10g34230;LOC_Os01g10110;LOC_Os12g02980;LOC_Os01g52770;LOC_Os11g10750
GO:0009750	response to fructose	Biological Process	35	0.0921265	5.6209e-05	LOC_Os05g39240;LOC_Os07g41320;LOC_Os01g57770;LOC_Os12g08090;LOC_Os04g19740;LOC_Os07g26630;LOC_Os06g22060;LOC_Os03g12290;LOC_Os08g43120;LOC_Os03g55850;LOC_Os03g28300;LOC_Os02g54254;LOC_Os04g48270;LOC_Os07g14850;LOC_Os01g52770;LOC_Os01g21034;LOC_Os03g43440;LOC_Os06g07600;LOC_Os11g37700;LOC_Os05g44200;LOC_Os03g55290;LOC_Os08g02120;LOC_Os02g54820;LOC_Os03g61740;LOC_Os02g01210;LOC_Os11g44810;LOC_Os04g…
GO:0019825	oxygen binding	Molecular Function	14	0.092396	0.000116368	LOC_Os05g37250;LOC_Os01g43740;LOC_Os05g12040;LOC_Os01g63930;LOC_Os06g39880;LOC_Os01g63540;LOC_Os02g47470;LOC_Os06g02019;LOC_Os01g11340;LOC_Os01g43750;LOC_Os05g11130;LOC_Os09g35940;LOC_Os02g44654;LOC_Os06g46680
GO:0006342	chromatin silencing	Biological Process	30	0.102468	6.25188e-05	LOC_Os10g07290;LOC_Os05g38480;LOC_Os03g12140;LOC_Os12g42160;LOC_Os05g33890;LOC_Os12g36100;LOC_Os01g41200;LOC_Os05g50490;LOC_Os08g44420;LOC_Os01g09580;LOC_Os01g49200;LOC_Os10g01570;LOC_Os09g28580;LOC_Os09g37910;LOC_Os12g37400;LOC_Os01g74146;LOC_Os06g22060;LOC_Os08g06600;LOC_Os07g02780;LOC_Os08g06550;LOC_Os03g51240;LOC_Os02g28074;LOC_Os01g36390;LOC_Os01g52160;LOC_Os09g36280;LOC_Os08g44360;LOC_Os02g…
GO:0010075	regulation of meristem growth	Biological Process	41	0.109131	6.6584e-05	LOC_Os09g15170;LOC_Os03g04770;LOC_Os02g12730;LOC_Os05g46350;LOC_Os08g39270;LOC_Os02g09740;LOC_Os02g41460;LOC_Os03g03810;LOC_Os08g07890;LOC_Os08g32500;LOC_Os09g35940;LOC_Os08g34380;LOC_Os04g48760;LOC_Os05g40200;LOC_Os08g45060;LOC_Os01g42294;LOC_Os11g42800;LOC_Os11g12620;LOC_Os04g39610;LOC_Os04g19740;LOC_Os10g32810;LOC_Os11g12530;LOC_Os01g63770;LOC_Os01g39830;LOC_Os07g31500;LOC_Os01g63580;LOC_Os01g…
GO:0016049	cell growth	Biological Process	62	0.111577	6.80763e-05	LOC_Os03g58350;LOC_Os03g18630;LOC_Os08g38270;LOC_Os11g38860;LOC_Os01g48940;LOC_Os07g42420;LOC_Os02g01140;LOC_Os02g05940;LOC_Os06g03670;LOC_Os02g06150;LOC_Os02g40260;LOC_Os04g38810;LOC_Os06g07220;LOC_Os09g04710;LOC_Os01g72700;LOC_Os11g35450;LOC_Os02g07870;LOC_Os01g48570;LOC_Os09g28500;LOC_Os11g01040;LOC_Os01g45700;LOC_Os07g41200;LOC_Os11g44430;LOC_Os02g05970;LOC_Os02g57110;LOC_Os03g64170;LOC_Os02g…
GO:0031222	arabinan catabolic process	Biological Process	5	0.112938	6.89066e-05	LOC_Os11g19210;LOC_Os04g54810;LOC_Os02g51620;LOC_Os11g18730;LOC_Os01g19220
GO:0042555	MCM complex	Cellular Component	4	0.123767	0.00055751	LOC_Os12g37400;LOC_Os02g55410;LOC_Os05g39850;LOC_Os01g36390
GO:0080027	response to herbivore	Biological Process	9	0.124937	7.62276e-05	LOC_Os05g44210;LOC_Os02g54820;LOC_Os10g41550;LOC_Os02g10120;LOC_Os03g04770;LOC_Os11g37950;LOC_Os10g32810;LOC_Os08g39850;LOC_Os08g39840
GO:0000280	nuclear division	Biological Process	12	0.132897	8.10841e-05	LOC_Os04g32110;LOC_Os12g39980;LOC_Os01g49200;LOC_Os11g42800;LOC_Os03g02290;LOC_Os03g50970;LOC_Os09g28580;LOC_Os03g43670;LOC_Os03g40100;LOC_Os04g28260;LOC_Os01g36390;LOC_Os07g32390
GO:0045735	nutrient reservoir activity	Molecular Function	15	0.135233	0.000170319	LOC_Os05g12630;LOC_Os08g08960;LOC_Os08g37180;LOC_Os08g08980;LOC_Os01g50900;LOC_Os08g08970;LOC_Os05g19670;LOC_Os08g35760;LOC_Os03g48780;LOC_Os05g10830;LOC_Os03g44880;LOC_Os01g18170;LOC_Os08g13440;LOC_Os09g25700;LOC_Os01g72290
GO:0009897	external side of plasma membrane	Cellular Component	11	0.143967	0.000648501	LOC_Os03g02750;LOC_Os04g48416;LOC_Os02g16940;LOC_Os04g03050;LOC_Os02g10520;LOC_Os10g25450;LOC_Os09g26920;LOC_Os03g55350;LOC_Os07g41320;LOC_Os02g53840;LOC_Os09g29670
GO:0009827	plant-type cell wall modification	Biological Process	43	0.144985	8.84594e-05	LOC_Os03g51910;LOC_Os05g44070;LOC_Os01g54030;LOC_Os02g42660;LOC_Os01g11810;LOC_Os04g55850;LOC_Os12g06660;LOC_Os05g44030;LOC_Os04g33740;LOC_Os11g05320;LOC_Os05g49300;LOC_Os03g60300;LOC_Os01g62990;LOC_Os03g62314;LOC_Os06g41060;LOC_Os01g42090;LOC_Os09g25090;LOC_Os01g44110;LOC_Os02g35760;LOC_Os03g18120;LOC_Os03g43720;LOC_Os12g01560;LOC_Os03g03810;LOC_Os01g10890;LOC_Os04g52320;LOC_Os03g11600;LOC_Os05g…
GO:0009694	jasmonic acid metabolic process	Biological Process	19	0.150928	9.20856e-05	LOC_Os08g36920;LOC_Os01g55240;LOC_Os01g63540;LOC_Os06g03930;LOC_Os10g34230;LOC_Os01g22910;LOC_Os01g71310;LOC_Os06g40150;LOC_Os02g44654;LOC_Os07g05460;LOC_Os08g42470;LOC_Os12g17160;LOC_Os03g51910;LOC_Os06g41060;LOC_Os12g07030;LOC_Os01g10110;LOC_Os10g38110;LOC_Os09g28440;LOC_Os03g09170
GO:0048829	root cap development	Biological Process	16	0.166707	0.000101713	LOC_Os05g50750;LOC_Os05g30820;LOC_Os10g42130;LOC_Os01g12660;LOC_Os03g43670;LOC_Os03g40100;LOC_Os11g03370;LOC_Os03g21030;LOC_Os01g63770;LOC_Os04g32110;LOC_Os06g04090;LOC_Os03g42630;LOC_Os05g37470;LOC_Os08g01330;LOC_Os01g55260;LOC_Os08g10080
GO:0009808	lignin metabolic process	Biological Process	11	0.168374	0.00010273	LOC_Os11g29780;LOC_Os05g41990;LOC_Os12g08920;LOC_Os09g32964;LOC_Os11g10460;LOC_Os11g43980;LOC_Os03g02920;LOC_Os03g18640;LOC_Os10g39170;LOC_Os12g34524;LOC_Os06g20150
GO:0005986	sucrose biosynthetic process	Biological Process	11	0.168374	0.00010273	LOC_Os12g02200;LOC_Os06g07600;LOC_Os09g25090;LOC_Os03g22120;LOC_Os04g33740;LOC_Os01g10890;LOC_Os07g10840;LOC_Os04g24430;LOC_Os04g17650;LOC_Os03g28330;LOC_Os02g58480
GO:0009909	regulation of flower development	Biological Process	51	0.168774	0.000102974	LOC_Os01g64020;LOC_Os10g32900;LOC_Os11g32100;LOC_Os02g07930;LOC_Os01g02060;LOC_Os03g43670;LOC_Os03g09170;LOC_Os05g39850;LOC_Os01g10320;LOC_Os09g27890;LOC_Os07g40300;LOC_Os01g61900;LOC_Os06g40150;LOC_Os05g38480;LOC_Os01g68730;LOC_Os02g56540;LOC_Os08g36920;LOC_Os12g07030;LOC_Os07g41320;LOC_Os12g39220;LOC_Os03g06670;LOC_Os04g32110;LOC_Os01g52160;LOC_Os01g36390;LOC_Os06g50900;LOC_Os02g53530;LOC_Os07g…
GO:0043481	anthocyanin accumulation in tissues in response to UV light	Biological Process	35	0.175265	0.000106934	LOC_Os04g48070;LOC_Os06g14810;LOC_Os05g43820;LOC_Os07g49390;LOC_Os07g02810;LOC_Os05g37470;LOC_Os04g05050;LOC_Os05g34170;LOC_Os03g01530;LOC_Os10g41550;LOC_Os10g31910;LOC_Os12g40890;LOC_Os11g33270;LOC_Os06g16300;LOC_Os02g46680;LOC_Os02g06140;LOC_Os03g54000;LOC_Os01g63580;LOC_Os01g34560;LOC_Os08g01140;LOC_Os07g32660;LOC_Os05g04600;LOC_Os06g01490;LOC_Os01g63770;LOC_Os11g12620;LOC_Os10g32810;LOC_Os06g…
GO:0002376	immune system process	Biological Process	16	0.186572	0.000113833	LOC_Os02g33680;LOC_Os01g22352;LOC_Os02g58720;LOC_Os01g64470;LOC_Os06g20150;LOC_Os05g03760;LOC_Os04g48930;LOC_Os10g39970;LOC_Os07g05110;LOC_Os05g42210;LOC_Os12g08920;LOC_Os12g34524;LOC_Os02g44670;LOC_Os10g39170;LOC_Os01g16450;LOC_Os02g13520
GO:0006306	DNA methylation	Biological Process	29	0.188597	0.000115068	LOC_Os02g30800;LOC_Os11g42800;LOC_Os01g74146;LOC_Os12g37400;LOC_Os01g08150;LOC_Os02g55410;LOC_Os08g44420;LOC_Os04g48760;LOC_Os01g41200;LOC_Os09g36740;LOC_Os03g11540;LOC_Os05g29010;LOC_Os12g42160;LOC_Os01g01170;LOC_Os10g28630;LOC_Os12g39980;LOC_Os03g02290;LOC_Os02g53200;LOC_Os12g13950;LOC_Os07g32390;LOC_Os02g50330;LOC_Os03g39020;LOC_Os08g44360;LOC_Os12g04980;LOC_Os05g39850;LOC_Os04g28260;LOC_Os01g…
GO:0052541	plant-type cell wall cellulose metabolic process	Biological Process	18	0.194526	0.000118686	LOC_Os08g34380;LOC_Os11g37700;LOC_Os10g40600;LOC_Os02g21340;LOC_Os01g08260;LOC_Os02g06930;LOC_Os08g07890;LOC_Os12g37840;LOC_Os04g39610;LOC_Os01g08020;LOC_Os08g43120;LOC_Os05g44030;LOC_Os06g45990;LOC_Os03g62314;LOC_Os03g43670;LOC_Os08g18920;LOC_Os04g31710;LOC_Os07g37850
GO:1901700	response to oxygen-containing compound	Biological Process	90	0.220628	0.000134611	LOC_Os08g03180;LOC_Os06g02780;LOC_Os03g38470;LOC_Os03g04250;LOC_Os06g09340;LOC_Os10g05490;LOC_Os04g39320;LOC_Os05g01140;LOC_Os12g43720;LOC_Os01g08220;LOC_Os01g66110;LOC_Os12g43490;LOC_Os07g05740;LOC_Os07g34850;LOC_Os01g67360;LOC_Os09g25570;LOC_Os02g13520;LOC_Os04g49210;LOC_Os03g18630;LOC_Os01g27230;LOC_Os01g72210;LOC_Os07g05110;LOC_Os04g32980;LOC_Os05g10210;LOC_Os02g40260;LOC_Os06g48500;LOC_Os01g…
GO:0040007	growth	Biological Process	25	0.235168	0.000143482	LOC_Os01g53880;LOC_Os03g24930;LOC_Os02g52010;LOC_Os06g36810;LOC_Os06g20310;LOC_Os06g50950;LOC_Os12g10670;LOC_Os10g25550;LOC_Os02g52040;LOC_Os12g39400;LOC_Os08g39850;LOC_Os10g02040;LOC_Os02g34600;LOC_Os07g49140;LOC_Os08g39840;LOC_Os07g48330;LOC_Os01g57450;LOC_Os10g40660;LOC_Os02g50690;LOC_Os07g49114;LOC_Os09g39910;LOC_Os02g13660;LOC_Os02g10120;LOC_Os06g11660;LOC_Os01g53840
GO:0033946	xyloglucan-specific endo-beta-1,4-glucanase activity	Molecular Function	6	0.238313	0.000300142	LOC_Os04g53950;LOC_Os08g13920;LOC_Os11g33270;LOC_Os04g51460;LOC_Os06g48180;LOC_Os06g48160
GO:0080039	xyloglucan endotransglucosylase activity	Molecular Function	6	0.238313	0.000300142	LOC_Os11g33270;LOC_Os04g53950;LOC_Os08g13920;LOC_Os06g48180;LOC_Os04g51460;LOC_Os06g48160
GO:0010304	PSII associated light-harvesting complex II catabolic process	Biological Process	13	0.239969	0.000146412	LOC_Os10g38360;LOC_Os01g49710;LOC_Os10g38710;LOC_Os09g36200;LOC_Os06g12370;LOC_Os01g49720;LOC_Os03g45194;LOC_Os05g44340;LOC_Os02g32520;LOC_Os10g38730;LOC_Os10g25030;LOC_Os10g38470;LOC_Os10g38780
GO:0009755	hormone-mediated signaling pathway	Biological Process	52	0.257239	0.000156949	LOC_Os07g05740;LOC_Os01g50410;LOC_Os06g03930;LOC_Os06g17490;LOC_Os04g48760;LOC_Os11g03370;LOC_Os02g44654;LOC_Os03g03570;LOC_Os01g33950;LOC_Os07g48160;LOC_Os01g50400;LOC_Os10g38780;LOC_Os11g12530;LOC_Os03g28300;LOC_Os05g07820;LOC_Os02g34970;LOC_Os02g08440;LOC_Os03g21730;LOC_Os09g16950;LOC_Os05g46750;LOC_Os07g05190;LOC_Os07g31500;LOC_Os07g02780;LOC_Os12g40010;LOC_Os01g50370;LOC_Os08g02990;LOC_Os03g…
GO:0048589	developmental growth	Biological Process	48	0.264809	0.000161568	LOC_Os11g35240;LOC_Os03g22040;LOC_Os03g50960;LOC_Os11g01040;LOC_Os01g03940;LOC_Os07g41200;LOC_Os01g16450;LOC_Os01g26270;LOC_Os12g13910;LOC_Os01g48570;LOC_Os04g59190;LOC_Os12g08920;LOC_Os07g48370;LOC_Os06g20150;LOC_Os09g38910;LOC_Os07g37810;LOC_Os12g34524;LOC_Os02g06150;LOC_Os08g38270;LOC_Os06g02960;LOC_Os04g46830;LOC_Os08g02070;LOC_Os01g72700;LOC_Os11g35450;LOC_Os04g34170;LOC_Os03g22790;LOC_Os07g…
GO:0009610	response to symbiotic fungus	Biological Process	13	0.274004	0.000167177	LOC_Os05g40200;LOC_Os08g37874;LOC_Os02g47790;LOC_Os01g02060;LOC_Os03g03980;LOC_Os08g36500;LOC_Os01g60330;LOC_Os05g46040;LOC_Os02g53130;LOC_Os10g42800;LOC_Os01g59840;LOC_Os01g40094;LOC_Os01g42294
GO:0006949	syncytium formation	Biological Process	9	0.292797	0.000178644	LOC_Os06g50400;LOC_Os01g60770;LOC_Os06g41700;LOC_Os05g37470;LOC_Os02g42650;LOC_Os03g21820;LOC_Os01g63770;LOC_Os05g39990;LOC_Os02g51040
GO:0009736	cytokinin-activated signaling pathway	Biological Process	22	0.296189	0.000180713	LOC_Os08g07890;LOC_Os02g35180;LOC_Os12g42160;LOC_Os12g04500;LOC_Os06g16300;LOC_Os08g34380;LOC_Os02g10760;LOC_Os12g36100;LOC_Os09g24810;LOC_Os01g10110;LOC_Os03g09170;LOC_Os12g39220;LOC_Os04g57720;LOC_Os11g04720;LOC_Os08g31580;LOC_Os03g02290;LOC_Os01g72330;LOC_Os05g49700;LOC_Os04g36070;LOC_Os11g42800;LOC_Os05g40960;LOC_Os02g51060
GO:0009744	response to sucrose	Biological Process	46	0.296267	0.000180761	LOC_Os03g12530;LOC_Os12g03040;LOC_Os04g02050;LOC_Os11g03300;LOC_Os02g54254;LOC_Os11g03370;LOC_Os03g60080;LOC_Os04g48270;LOC_Os12g32640;LOC_Os08g43120;LOC_Os03g28300;LOC_Os03g10620;LOC_Os03g20090;LOC_Os12g08260;LOC_Os06g45710;LOC_Os01g03914;LOC_Os10g32900;LOC_Os08g01140;LOC_Os06g14810;LOC_Os01g61900;LOC_Os02g41510;LOC_Os08g02120;LOC_Os11g37700;LOC_Os06g07600;LOC_Os06g39750;LOC_Os11g03440;LOC_Os07g…
GO:0009697	salicylic acid biosynthetic process	Biological Process	53	0.301276	0.000183817	LOC_Os01g72460;LOC_Os03g50960;LOC_Os04g51610;LOC_Os05g39240;LOC_Os06g14670;LOC_Os07g04040;LOC_Os03g55850;LOC_Os01g02570;LOC_Os03g44810;LOC_Os12g35610;LOC_Os03g01300;LOC_Os03g24930;LOC_Os10g20890;LOC_Os11g37700;LOC_Os12g07640;LOC_Os02g36890;LOC_Os11g42510;LOC_Os02g15750;LOC_Os03g52650;LOC_Os06g43600;LOC_Os04g59370;LOC_Os07g26660;LOC_Os03g21710;LOC_Os06g07220;LOC_Os01g08260;LOC_Os02g21340;LOC_Os01g…
GO:0009734	auxin-activated signaling pathway	Biological Process	28	0.302281	0.00018443	LOC_Os05g37470;LOC_Os05g43820;LOC_Os03g58350;LOC_Os02g07110;LOC_Os01g66890;LOC_Os09g37480;LOC_Os09g37500;LOC_Os02g06140;LOC_Os12g40890;LOC_Os04g55950;LOC_Os01g53880;LOC_Os12g43110;LOC_Os04g40630;LOC_Os09g26590;LOC_Os02g24700;LOC_Os06g04590;LOC_Os01g63770;LOC_Os11g05320;LOC_Os03g05530;LOC_Os01g13520;LOC_Os07g40290;LOC_Os08g35110;LOC_Os01g36580;LOC_Os02g56120;LOC_Os02g13520;LOC_Os06g01966;LOC_Os12g…
GO:0009644	response to high light intensity	Biological Process	42	0.31869	0.000194442	LOC_Os07g05365;LOC_Os02g54140;LOC_Os06g46900;LOC_Os01g36790;LOC_Os06g39750;LOC_Os01g58850;LOC_Os02g13800;LOC_Os08g39850;LOC_Os03g20120;LOC_Os04g37990;LOC_Os04g02050;LOC_Os06g35960;LOC_Os03g15960;LOC_Os02g10120;LOC_Os03g16920;LOC_Os03g14180;LOC_Os10g07200;LOC_Os05g41490;LOC_Os08g39840;LOC_Os01g12580;LOC_Os03g11910;LOC_Os01g34560;LOC_Os07g48830;LOC_Os05g44340;LOC_Os06g12370;LOC_Os01g04380;LOC_Os10g…
GO:0052635	C-20 gibberellin 2-beta-dioxygenase activity	Molecular Function	4	0.318951	0.000401702	LOC_Os01g22910;LOC_Os01g55240;LOC_Os02g41954;LOC_Os07g01340
GO:0009815	1-aminocyclopropane-1-carboxylate oxidase activity	Molecular Function	4	0.318951	0.000401702	LOC_Os09g27820;LOC_Os09g27750;LOC_Os05g05670;LOC_Os05g05680
GO:0048262	determination of dorsal/ventral asymmetry	Biological Process	9	0.355947	0.000217174	LOC_Os05g51160;LOC_Os05g37060;LOC_Os05g50340;LOC_Os01g44390;LOC_Os01g09640;LOC_Os05g10690;LOC_Os05g49240;LOC_Os01g64360;LOC_Os05g50350
GO:0010037	response to carbon dioxide	Biological Process	9	0.355947	0.000217174	LOC_Os03g28330;LOC_Os01g45274;LOC_Os08g36680;LOC_Os04g24430;LOC_Os04g17650;LOC_Os03g22120;LOC_Os07g08350;LOC_Os04g51610;LOC_Os01g28840
GO:0045493	xylan catabolic process	Biological Process	9	0.355947	0.000217174	LOC_Os02g51620;LOC_Os03g47010;LOC_Os03g10478;LOC_Os06g25010;LOC_Os01g19220;LOC_Os06g24990;LOC_Os11g18730;LOC_Os11g19210;LOC_Os04g54810
GO:0006096	glycolytic process	Biological Process	45	0.381264	0.00023262	LOC_Os05g34170;LOC_Os05g01810;LOC_Os09g39910;LOC_Os05g03130;LOC_Os03g01530;LOC_Os03g05310;LOC_Os02g48450;LOC_Os07g46990;LOC_Os07g26660;LOC_Os01g71320;LOC_Os04g08350;LOC_Os12g10660;LOC_Os02g34600;LOC_Os06g13720;LOC_Os06g45710;LOC_Os03g62090;LOC_Os05g25350;LOC_Os01g73980;LOC_Os01g44130;LOC_Os04g48930;LOC_Os01g72460;LOC_Os09g31522;LOC_Os02g51890;LOC_Os05g04700;LOC_Os01g33160;LOC_Os09g37910;LOC_Os07g…
GO:0031981	nuclear lumen	Cellular Component	49	0.381734	0.00171952	LOC_Os01g14960;LOC_Os12g39400;LOC_Os08g36570;LOC_Os09g30490;LOC_Os05g46760;LOC_Os01g71170;LOC_Os04g36600;LOC_Os09g32470;LOC_Os12g43110;LOC_Os02g39510;LOC_Os10g34010;LOC_Os06g25950;LOC_Os04g58890;LOC_Os08g01940;LOC_Os11g45990;LOC_Os07g39850;LOC_Os02g07110;LOC_Os07g04150;LOC_Os08g03180;LOC_Os02g04380;LOC_Os08g31850;LOC_Os07g41600;LOC_Os09g31130;LOC_Os06g46920;LOC_Os03g06250;LOC_Os05g12630;LOC_Os08g…
GO:0042335	cuticle development	Biological Process	24	0.385128	0.000234977	LOC_Os01g53640;LOC_Os06g14810;LOC_Os05g44030;LOC_Os04g48070;LOC_Os03g62314;LOC_Os08g18920;LOC_Os10g33250;LOC_Os07g42420;LOC_Os02g56920;LOC_Os09g16449;LOC_Os10g25550;LOC_Os05g33080;LOC_Os03g24930;LOC_Os02g35760;LOC_Os01g44110;LOC_Os10g33370;LOC_Os05g44200;LOC_Os01g08260;LOC_Os01g34560;LOC_Os01g52770;LOC_Os06g29180;LOC_Os02g29640;LOC_Os06g39750;LOC_Os01g63580
GO:0045926	negative regulation of growth	Biological Process	8	0.401084	0.000244713	LOC_Os12g35670;LOC_Os03g60570;LOC_Os03g60560;LOC_Os01g25540;LOC_Os07g48060;LOC_Os01g25560;LOC_Os10g02040;LOC_Os01g62190
GO:0034059	response to anoxia	Biological Process	8	0.401084	0.000244713	LOC_Os07g42510;LOC_Os12g07030;LOC_Os02g52670;LOC_Os06g40150;LOC_Os09g28440;LOC_Os08g36920;LOC_Os02g10760;LOC_Os03g08460
GO:0010025	wax biosynthetic process	Biological Process	15	0.40797	0.000248914	LOC_Os08g44360;LOC_Os06g39750;LOC_Os02g56920;LOC_Os02g29640;LOC_Os10g33250;LOC_Os03g04530;LOC_Os02g50330;LOC_Os01g34560;LOC_Os05g04170;LOC_Os09g29670;LOC_Os09g39410;LOC_Os10g33370;LOC_Os11g35400;LOC_Os06g44300;LOC_Os06g14810
GO:0048229	gametophyte development	Biological Process	23	0.410618	0.000250529	LOC_Os02g05940;LOC_Os10g41550;LOC_Os03g21730;LOC_Os05g07820;LOC_Os11g12530;LOC_Os03g18630;LOC_Os08g05290;LOC_Os11g42450;LOC_Os11g42800;LOC_Os01g48570;LOC_Os07g07990;LOC_Os10g32810;LOC_Os11g12620;LOC_Os01g68730;LOC_Os01g72700;LOC_Os03g03570;LOC_Os07g31500;LOC_Os03g04770;LOC_Os04g48760;LOC_Os04g30720;LOC_Os03g20450;LOC_Os07g05740;LOC_Os10g38800
GO:0019344	cysteine biosynthetic process	Biological Process	35	0.41743	0.000254686	LOC_Os07g02100;LOC_Os01g25484;LOC_Os08g01140;LOC_Os07g26660;LOC_Os08g06550;LOC_Os02g49480;LOC_Os06g45710;LOC_Os07g02120;LOC_Os02g47420;LOC_Os02g49680;LOC_Os09g19710;LOC_Os08g02120;LOC_Os03g01530;LOC_Os05g34170;LOC_Os03g50970;LOC_Os01g06640;LOC_Os03g09940;LOC_Os02g15750;LOC_Os11g02610;LOC_Os02g48450;LOC_Os07g05365;LOC_Os04g52390;LOC_Os03g40100;LOC_Os02g51750;LOC_Os03g03810;LOC_Os04g32920;LOC_Os05g…
GO:0048653	anther development	Biological Process	34	0.419898	0.000256192	LOC_Os06g21230;LOC_Os05g07820;LOC_Os07g07990;LOC_Os04g52780;LOC_Os11g12620;LOC_Os09g08720;LOC_Os01g48570;LOC_Os09g31522;LOC_Os02g51890;LOC_Os07g05190;LOC_Os03g21730;LOC_Os10g33250;LOC_Os01g63930;LOC_Os05g37250;LOC_Os04g48760;LOC_Os06g11730;LOC_Os03g17760;LOC_Os08g34380;LOC_Os07g05740;LOC_Os03g03570;LOC_Os08g07890;LOC_Os02g09740;LOC_Os02g44654;LOC_Os03g18630;LOC_Os04g53860;LOC_Os11g42450;LOC_Os01g…
GO:0010214	seed coat development	Biological Process	11	0.434495	0.000265097	LOC_Os01g19220;LOC_Os01g58280;LOC_Os04g58710;LOC_Os03g62090;LOC_Os02g16940;LOC_Os02g51620;LOC_Os04g54810;LOC_Os02g53840;LOC_Os11g18730;LOC_Os11g19210;LOC_Os07g14850
GO:0010223	secondary shoot formation	Biological Process	22	0.434844	0.000265311	LOC_Os03g10620;LOC_Os01g20780;LOC_Os02g51890;LOC_Os09g31522;LOC_Os03g21030;LOC_Os01g61900;LOC_Os06g21230;LOC_Os08g05290;LOC_Os09g08720;LOC_Os11g12620;LOC_Os01g41240;LOC_Os04g53860;LOC_Os10g42130;LOC_Os11g03370;LOC_Os06g11730;LOC_Os06g04090;LOC_Os03g42630;LOC_Os02g40900;LOC_Os08g01330;LOC_Os10g32900;LOC_Os08g10080;LOC_Os03g17760
GO:0006334	nucleosome assembly	Biological Process	16	0.43487	0.000265326	LOC_Os08g33100;LOC_Os07g08710;LOC_Os12g41910;LOC_Os11g05730;LOC_Os02g45940;LOC_Os03g06670;LOC_Os05g36280;LOC_Os01g31800;LOC_Os05g02300;LOC_Os06g06460;LOC_Os03g17100;LOC_Os06g06510;LOC_Os04g49420;LOC_Os04g34240;LOC_Os08g38300;LOC_Os01g64640
GO:0010333	terpene synthase activity	Molecular Function	9	0.44234	0.000557104	LOC_Os04g09900;LOC_Os04g27670;LOC_Os03g24760;LOC_Os05g16980;LOC_Os04g27540;LOC_Os04g27190;LOC_Os03g22620;LOC_Os02g17780;LOC_Os08g04500
GO:0010310	regulation of hydrogen peroxide metabolic process	Biological Process	45	0.453014	0.000276397	LOC_Os01g47760;LOC_Os01g72460;LOC_Os06g14670;LOC_Os05g39240;LOC_Os01g09830;LOC_Os07g04040;LOC_Os03g55850;LOC_Os01g02570;LOC_Os08g43120;LOC_Os01g48570;LOC_Os01g02750;LOC_Os01g02580;LOC_Os08g37180;LOC_Os07g18230;LOC_Os06g11330;LOC_Os12g07640;LOC_Os11g37700;LOC_Os02g49986;LOC_Os02g36890;LOC_Os01g02400;LOC_Os07g40290;LOC_Os01g02370;LOC_Os07g37210;LOC_Os09g23620;LOC_Os03g28330;LOC_Os02g50330;LOC_Os02g…
GO:0006816	calcium ion transport	Biological Process	26	0.463587	0.000282847	LOC_Os07g14850;LOC_Os01g34560;LOC_Os08g39850;LOC_Os06g39750;LOC_Os04g43390;LOC_Os07g26660;LOC_Os08g06550;LOC_Os01g74450;LOC_Os01g41200;LOC_Os03g62090;LOC_Os08g39860;LOC_Os07g41320;LOC_Os08g42350;LOC_Os02g10120;LOC_Os08g36680;LOC_Os04g51610;LOC_Os02g01590;LOC_Os12g29220;LOC_Os07g26630;LOC_Os04g19740;LOC_Os02g30910;LOC_Os11g02610;LOC_Os02g07870;LOC_Os02g51060;LOC_Os06g14810;LOC_Os08g39840
GO:0010228	vegetative to reproductive phase transition of meristem	Biological Process	57	0.472132	0.000288061	LOC_Os03g02290;LOC_Os04g53860;LOC_Os08g02070;LOC_Os04g48070;LOC_Os03g52460;LOC_Os01g70730;LOC_Os01g34560;LOC_Os06g50900;LOC_Os01g16650;LOC_Os11g42800;LOC_Os04g49130;LOC_Os06g21230;LOC_Os09g28440;LOC_Os02g51890;LOC_Os04g43200;LOC_Os08g44420;LOC_Os07g14850;LOC_Os03g40100;LOC_Os12g35610;LOC_Os01g58850;LOC_Os04g54930;LOC_Os06g39750;LOC_Os12g15530;LOC_Os10g35580;LOC_Os01g10320;LOC_Os03g05310;LOC_Os06g…
GO:0001666	response to hypoxia	Biological Process	20	0.475313	0.000290002	LOC_Os02g52040;LOC_Os12g29330;LOC_Os02g58480;LOC_Os03g22120;LOC_Os02g52010;LOC_Os04g24430;LOC_Os03g60080;LOC_Os04g17650;LOC_Os11g03370;LOC_Os12g24020;LOC_Os11g03300;LOC_Os01g32770;LOC_Os01g43590;LOC_Os03g21030;LOC_Os02g34970;LOC_Os06g11660;LOC_Os05g34830;LOC_Os03g28330;LOC_Os07g42510;LOC_Os03g21060
GO:0010015	root morphogenesis	Biological Process	27	0.482455	0.000294359	LOC_Os08g38270;LOC_Os03g11400;LOC_Os03g64170;LOC_Os03g18630;LOC_Os03g58350;LOC_Os08g05290;LOC_Os01g61570;LOC_Os07g32390;LOC_Os06g04850;LOC_Os09g39910;LOC_Os02g01140;LOC_Os10g38800;LOC_Os02g52930;LOC_Os01g60330;LOC_Os06g43044;LOC_Os09g04710;LOC_Os01g04230;LOC_Os01g42294;LOC_Os03g21730;LOC_Os03g05530;LOC_Os06g04870;LOC_Os05g40200;LOC_Os01g36580;LOC_Os11g01620;LOC_Os03g03570;LOC_Os12g40900;LOC_Os01g…
GO:0048527	lateral root development	Biological Process	35	0.487084	0.000297184	LOC_Os12g40900;LOC_Os11g37260;LOC_Os01g09100;LOC_Os04g54930;LOC_Os10g38710;LOC_Os01g49710;LOC_Os11g03370;LOC_Os06g20150;LOC_Os01g49720;LOC_Os10g38360;LOC_Os10g38780;LOC_Os05g04600;LOC_Os04g38780;LOC_Os10g38730;LOC_Os07g07990;LOC_Os02g43560;LOC_Os04g51040;LOC_Os01g26300;LOC_Os02g34600;LOC_Os04g29680;LOC_Os01g50820;LOC_Os11g35860;LOC_Os02g46680;LOC_Os03g42630;LOC_Os05g41990;LOC_Os06g49100;LOC_Os12g…
GO:0052546	cell wall pectin metabolic process	Biological Process	19	0.488819	0.000298242	LOC_Os07g37850;LOC_Os04g31710;LOC_Os03g43670;LOC_Os08g18920;LOC_Os03g62314;LOC_Os06g45990;LOC_Os05g44030;LOC_Os08g43120;LOC_Os11g38860;LOC_Os01g08020;LOC_Os04g39610;LOC_Os12g37840;LOC_Os08g07890;LOC_Os02g06930;LOC_Os02g21340;LOC_Os01g08260;LOC_Os10g40600;LOC_Os11g37700;LOC_Os08g34380
GO:0019139	cytokinin dehydrogenase activity	Molecular Function	4	0.512965	0.000646051	LOC_Os01g71310;LOC_Os10g34230;LOC_Os01g10110;LOC_Os08g35860
GO:0004630	phospholipase D activity	Molecular Function	5	0.52899	0.000666234	LOC_Os03g02740;LOC_Os01g20860;LOC_Os03g27370;LOC_Os08g31060;LOC_Os06g40170
GO:0005794	Golgi apparatus	Cellular Component	121	0.533341	0.00240244	LOC_Os04g49420;LOC_Os05g38530;LOC_Os03g61670;LOC_Os01g55260;LOC_Os01g20780;LOC_Os09g19710;LOC_Os06g48160;LOC_Os12g40890;LOC_Os01g03914;LOC_Os10g02040;LOC_Os05g50750;LOC_Os11g10460;LOC_Os06g49220;LOC_Os03g11910;LOC_Os01g11810;LOC_Os06g11730;LOC_Os01g66110;LOC_Os03g12530;LOC_Os01g67360;LOC_Os01g62760;LOC_Os05g37470;LOC_Os11g38860;LOC_Os04g53860;LOC_Os11g29780;LOC_Os03g01530;LOC_Os02g40010;LOC_Os10g…
GO:0009416	response to light stimulus	Biological Process	44	0.557445	0.000340113	LOC_Os11g03440;LOC_Os01g62760;LOC_Os03g55830;LOC_Os11g03370;LOC_Os03g60080;LOC_Os02g46910;LOC_Os06g11330;LOC_Os11g03300;LOC_Os06g39750;LOC_Os01g43750;LOC_Os10g40810;LOC_Os07g40290;LOC_Os12g03040;LOC_Os03g25490;LOC_Os07g23570;LOC_Os12g35350;LOC_Os03g60560;LOC_Os02g53130;LOC_Os01g19480;LOC_Os05g33570;LOC_Os12g39320;LOC_Os08g34720;LOC_Os12g06660;LOC_Os03g28300;LOC_Os12g43720;LOC_Os12g03150;LOC_Os03g…
GO:0009686	gibberellin biosynthetic process	Biological Process	19	0.577314	0.000352235	LOC_Os12g40920;LOC_Os04g09900;LOC_Os01g08220;LOC_Os06g02019;LOC_Os01g25500;LOC_Os11g28530;LOC_Os01g72210;LOC_Os01g32770;LOC_Os03g38170;LOC_Os03g28300;LOC_Os07g48630;LOC_Os08g43600;LOC_Os02g17780;LOC_Os03g63970;LOC_Os03g04130;LOC_Os06g46920;LOC_Os05g34854;LOC_Os08g39830;LOC_Os02g36264
GO:0034639	L-amino acid efflux transmembrane transporter activity	Molecular Function	7	0.58669	0.000738904	LOC_Os06g01972;LOC_Os02g52930;LOC_Os06g01966;LOC_Os03g05530;LOC_Os04g59120;LOC_Os12g33300;LOC_Os01g36580
GO:0015175	neutral amino acid transmembrane transporter activity	Molecular Function	7	0.58669	0.000738904	LOC_Os04g47420;LOC_Os12g09300;LOC_Os04g56470;LOC_Os12g08090;LOC_Os03g60260;LOC_Os04g41350;LOC_Os02g01210
GO:0031012	extracellular matrix	Cellular Component	7	0.614898	0.00276981	LOC_Os08g13440;LOC_Os08g35760;LOC_Os08g08980;LOC_Os08g08960;LOC_Os06g44260;LOC_Os05g15850;LOC_Os08g08970
GO:0048765	root hair cell differentiation	Biological Process	38	0.617314	0.000376641	LOC_Os04g44500;LOC_Os04g48070;LOC_Os02g44320;LOC_Os06g48180;LOC_Os04g46830;LOC_Os08g02070;LOC_Os01g10320;LOC_Os12g29400;LOC_Os05g41990;LOC_Os12g34524;LOC_Os04g42950;LOC_Os02g18410;LOC_Os06g48160;LOC_Os01g26300;LOC_Os11g10460;LOC_Os06g43860;LOC_Os11g07912;LOC_Os04g51460;LOC_Os07g22580;LOC_Os05g44030;LOC_Os01g08470;LOC_Os04g39610;LOC_Os09g28720;LOC_Os03g50960;LOC_Os03g20090;LOC_Os12g37690;LOC_Os08g…
GO:0052692	raffinose alpha-galactosidase activity	Molecular Function	3	0.641212	0.000807572	LOC_Os10g35070;LOC_Os07g48160;LOC_Os07g10840
GO:0009612	response to mechanical stimulus	Biological Process	17	0.648828	0.000395868	LOC_Os06g48160;LOC_Os02g52040;LOC_Os11g33270;LOC_Os02g52010;LOC_Os08g13920;LOC_Os04g51460;LOC_Os02g16500;LOC_Os01g64730;LOC_Os12g41110;LOC_Os08g34170;LOC_Os06g48180;LOC_Os04g58810;LOC_Os06g11660;LOC_Os01g54890;LOC_Os04g46220;LOC_Os04g53950;LOC_Os02g52780
GO:0010383	cell wall polysaccharide metabolic process	Biological Process	4	0.649608	0.000396344	LOC_Os04g59320;LOC_Os01g16310;LOC_Os01g70970;LOC_Os01g71170
GO:0048354	mucilage biosynthetic process involved in seed coat development	Biological Process	13	0.649858	0.000396497	LOC_Os01g45090;LOC_Os09g23620;LOC_Os12g37970;LOC_Os06g14670;LOC_Os12g37690;LOC_Os07g37210;LOC_Os03g20090;LOC_Os11g03440;LOC_Os12g03150;LOC_Os12g07640;LOC_Os02g49986;LOC_Os05g04820;LOC_Os02g41510
GO:0009687	abscisic acid metabolic process	Biological Process	7	0.65821	0.000401593	LOC_Os06g02019;LOC_Os09g30160;LOC_Os05g11130;LOC_Os08g38460;LOC_Os07g48680;LOC_Os07g33620;LOC_Os03g45619
GO:0019953	sexual reproduction	Biological Process	11	0.665471	0.000406023	LOC_Os07g31390;LOC_Os06g11660;LOC_Os10g30290;LOC_Os02g01140;LOC_Os10g40730;LOC_Os02g42650;LOC_Os04g43200;LOC_Os02g52040;LOC_Os10g40720;LOC_Os02g44108;LOC_Os02g52010
GO:0044422	organelle part	Cellular Component	3	0.671985	0.00302696	LOC_Os06g03930;LOC_Os04g40590;LOC_Os10g38110
GO:0043674	columella	Cellular Component	3	0.671985	0.00302696	LOC_Os01g08020;LOC_Os12g37840;LOC_Os01g74450
GO:0033554	cellular response to stress	Biological Process	52	0.705315	0.000430333	LOC_Os11g26790;LOC_Os07g35004;LOC_Os10g05490;LOC_Os06g09340;LOC_Os07g40300;LOC_Os04g41350;LOC_Os01g43590;LOC_Os08g02990;LOC_Os08g35160;LOC_Os09g21120;LOC_Os11g10710;LOC_Os06g17490;LOC_Os11g26780;LOC_Os03g57080;LOC_Os01g53430;LOC_Os02g58720;LOC_Os05g03920;LOC_Os09g16950;LOC_Os07g05190;LOC_Os03g06290;LOC_Os10g17960;LOC_Os11g02300;LOC_Os02g16940;LOC_Os07g35750;LOC_Os05g08750;LOC_Os09g37050;LOC_Os01g…
GO:0046482	para-aminobenzoic acid metabolic process	Biological Process	14	0.716052	0.000436884	LOC_Os04g58710;LOC_Os08g37874;LOC_Os03g08460;LOC_Os08g36920;LOC_Os07g42510;LOC_Os12g07030;LOC_Os04g46220;LOC_Os02g52670;LOC_Os01g11860;LOC_Os09g28440;LOC_Os09g30120;LOC_Os04g53930;LOC_Os09g34214;LOC_Os05g41780
GO:0009845	seed germination	Biological Process	45	0.777497	0.000474373	LOC_Os11g42450;LOC_Os02g21090;LOC_Os01g10320;LOC_Os02g41510;LOC_Os03g43670;LOC_Os03g09170;LOC_Os09g23620;LOC_Os07g37210;LOC_Os11g32100;LOC_Os10g40960;LOC_Os09g23300;LOC_Os01g45090;LOC_Os04g32110;LOC_Os01g53640;LOC_Os03g20090;LOC_Os12g07030;LOC_Os06g11730;LOC_Os01g44110;LOC_Os08g36920;LOC_Os02g49986;LOC_Os03g17760;LOC_Os06g40150;LOC_Os12g37970;LOC_Os06g21250;LOC_Os04g49980;LOC_Os10g36650;LOC_Os02g…
GO:0045549	9-cis-epoxycarotenoid dioxygenase activity	Molecular Function	4	0.777895	0.000979716	LOC_Os12g24800;LOC_Os12g42280;LOC_Os03g44380;LOC_Os07g05940
GO:0009624	response to nematode	Biological Process	39	0.789157	0.000481487	LOC_Os08g36680;LOC_Os02g21009;LOC_Os04g51610;LOC_Os07g26630;LOC_Os02g46460;LOC_Os12g08090;LOC_Os02g41780;LOC_Os05g34010;LOC_Os05g04600;LOC_Os01g17214;LOC_Os01g63770;LOC_Os01g21034;LOC_Os01g09100;LOC_Os12g12934;LOC_Os03g60850;LOC_Os02g09740;LOC_Os04g54930;LOC_Os10g02100;LOC_Os05g33890;LOC_Os01g49200;LOC_Os07g15370;LOC_Os10g20470;LOC_Os11g04060;LOC_Os03g42830;LOC_Os05g27010;LOC_Os05g37470;LOC_Os02g…
GO:0019827	stem cell maintenance	Biological Process	6	0.789549	0.000481726	LOC_Os04g36070;LOC_Os02g35180;LOC_Os11g04720;LOC_Os04g57720;LOC_Os12g04500;LOC_Os01g72330
GO:0019375	galactolipid biosynthetic process	Biological Process	25	0.790547	0.000482335	LOC_Os01g09100;LOC_Os01g11340;LOC_Os09g32670;LOC_Os03g43440;LOC_Os10g38710;LOC_Os04g17650;LOC_Os04g24430;LOC_Os06g29790;LOC_Os03g22120;LOC_Os09g25090;LOC_Os01g52230;LOC_Os02g58480;LOC_Os07g48760;LOC_Os03g13540;LOC_Os01g49720;LOC_Os03g28330;LOC_Os09g25100;LOC_Os06g40120;LOC_Os10g38470;LOC_Os10g38780;LOC_Os01g20860;LOC_Os01g60600;LOC_Os11g05410;LOC_Os02g43560;LOC_Os03g14420
GO:0080165	callose deposition in phloem sieve plate	Biological Process	3	0.829323	0.000505993	LOC_Os04g17650;LOC_Os04g24430;LOC_Os02g58480
GO:0044446	intracellular organelle part	Cellular Component	108	0.844117	0.00380233	LOC_Os10g39870;LOC_Os01g54340;LOC_Os02g21090;LOC_Os01g50370;LOC_Os08g23870;LOC_Os01g40550;LOC_Os10g25290;LOC_Os03g06360;LOC_Os08g39370;LOC_Os08g41290;LOC_Os05g51630;LOC_Os04g40630;LOC_Os08g06600;LOC_Os01g42900;LOC_Os02g41840;LOC_Os03g49830;LOC_Os03g26490;LOC_Os01g33080;LOC_Os05g46750;LOC_Os02g56920;LOC_Os09g29670;LOC_Os01g52570;LOC_Os11g14140;LOC_Os04g40560;LOC_Os03g05210;LOC_Os10g39970;LOC_Os06g…
GO:0033612	receptor serine/threonine kinase binding	Molecular Function	10	0.873288	0.00109986	LOC_Os11g12530;LOC_Os08g05290;LOC_Os08g34380;LOC_Os06g16300;LOC_Os10g32810;LOC_Os02g06140;LOC_Os11g12620;LOC_Os08g07890;LOC_Os10g41550;LOC_Os03g04770
GO:0009705	plant-type vacuole membrane	Cellular Component	29	0.875423	0.00394335	LOC_Os01g36580;LOC_Os01g12260;LOC_Os07g48760;LOC_Os01g74450;LOC_Os10g02100;LOC_Os03g60850;LOC_Os04g53930;LOC_Os01g17214;LOC_Os08g37432;LOC_Os05g34010;LOC_Os02g46460;LOC_Os04g51610;LOC_Os03g05530;LOC_Os12g33300;LOC_Os02g21009;LOC_Os03g04250;LOC_Os12g06060;LOC_Os02g52930;LOC_Os01g50820;LOC_Os02g58530;LOC_Os10g40600;LOC_Os06g49220;LOC_Os01g36720;LOC_Os06g36450;LOC_Os03g42830;LOC_Os05g27010;LOC_Os11g…
GO:1901701	cellular response to oxygen-containing compound	Biological Process	65	0.877123	0.000535157	LOC_Os12g34524;LOC_Os02g06150;LOC_Os10g39170;LOC_Os08g32060;LOC_Os02g05940;LOC_Os10g05600;LOC_Os09g37050;LOC_Os01g55150;LOC_Os01g66510;LOC_Os05g08750;LOC_Os01g63540;LOC_Os03g06290;LOC_Os02g53530;LOC_Os01g50420;LOC_Os01g16450;LOC_Os09g29360;LOC_Os07g39820;LOC_Os04g43710;LOC_Os04g52260;LOC_Os12g17160;LOC_Os08g03020;LOC_Os04g53930;LOC_Os11g36160;LOC_Os01g48446;LOC_Os01g70970;LOC_Os03g14050;LOC_Os12g…
GO:0048825	cotyledon development	Biological Process	23	0.881188	0.000537638	LOC_Os04g43200;LOC_Os05g41780;LOC_Os08g31580;LOC_Os12g07030;LOC_Os09g28440;LOC_Os03g09170;LOC_Os03g43670;LOC_Os04g52090;LOC_Os11g05320;LOC_Os04g32110;LOC_Os04g48070;LOC_Os01g12490;LOC_Os01g10320;LOC_Os07g48630;LOC_Os03g40100;LOC_Os12g41910;LOC_Os06g40150;LOC_Os02g10760;LOC_Os08g36920;LOC_Os08g39830;LOC_Os04g47300;LOC_Os05g25260;LOC_Os08g40170
GO:0006073	cellular glucan metabolic process	Biological Process	14	0.882379	0.000538364	LOC_Os08g13920;LOC_Os11g33270;LOC_Os06g48180;LOC_Os03g13570;LOC_Os01g16310;LOC_Os02g05940;LOC_Os01g72700;LOC_Os01g04230;LOC_Os04g53950;LOC_Os02g46910;LOC_Os11g01620;LOC_Os03g01800;LOC_Os04g51460;LOC_Os10g02770
GO:0008574	plus-end-directed microtubule motor activity	Molecular Function	5	0.923304	0.00116285	LOC_Os12g42160;LOC_Os04g28260;LOC_Os12g39980;LOC_Os03g02290;LOC_Os12g36100
GO:0019901	protein kinase binding	Molecular Function	15	0.956434	0.00120458	LOC_Os05g42200;LOC_Os05g41390;LOC_Os05g43820;LOC_Os01g59120;LOC_Os07g37810;LOC_Os03g43670;LOC_Os01g53840;LOC_Os03g62314;LOC_Os07g08350;LOC_Os02g35760;LOC_Os06g51110;LOC_Os05g33080;LOC_Os02g09740;LOC_Os01g28840;LOC_Os10g41430
GO:0042545	cell wall modification	Biological Process	26	0.974854	0.000594786	LOC_Os09g27890;LOC_Os06g48180;LOC_Os02g54190;LOC_Os01g53640;LOC_Os04g39610;LOC_Os05g44600;LOC_Os12g41690;LOC_Os06g11730;LOC_Os03g24930;LOC_Os05g33690;LOC_Os05g40200;LOC_Os08g13920;LOC_Os01g60330;LOC_Os05g33080;LOC_Os06g48160;LOC_Os05g50490;LOC_Os03g17760;LOC_Os06g16300;LOC_Os09g26360;LOC_Os03g54910;LOC_Os06g09340;LOC_Os02g53000;LOC_Os01g21034;LOC_Os01g15039;LOC_Os04g51460;LOC_Os01g57854
GO:0043621	protein self-association	Molecular Function	14	1	0.00129585	LOC_Os11g12530;LOC_Os08g05290;LOC_Os06g04870;LOC_Os02g06140;LOC_Os10g32810;LOC_Os11g12620;LOC_Os04g51610;LOC_Os12g35610;LOC_Os10g41550;LOC_Os09g37600;LOC_Os01g53840;LOC_Os06g04850;LOC_Os08g36680;LOC_Os03g04770
GO:0015114	phosphate ion transmembrane transporter activity	Molecular Function	5	1	0.00149439	LOC_Os06g29790;LOC_Os04g10690;LOC_Os02g56510;LOC_Os04g42520;LOC_Os02g40010
GO:0071771	aldehyde decarbonylase activity	Molecular Function	3	1	0.0015619	LOC_Os02g56920;LOC_Os02g29640;LOC_Os10g33250
GO:0008094	DNA-dependent ATPase activity	Molecular Function	6	1	0.00176449	LOC_Os01g36390;LOC_Os05g39850;LOC_Os12g04980;LOC_Os01g71690;LOC_Os12g37400;LOC_Os02g55410
GO:0015172	acidic amino acid transmembrane transporter activity	Molecular Function	6	1	0.00176449	LOC_Os04g56470;LOC_Os12g09300;LOC_Os02g01210;LOC_Os12g08090;LOC_Os04g47420;LOC_Os04g41350
GO:0031625	ubiquitin protein ligase binding	Molecular Function	19	1	0.00177722	LOC_Os02g02830;LOC_Os03g16920;LOC_Os05g42210;LOC_Os08g10310;LOC_Os07g26630;LOC_Os01g16650;LOC_Os11g42800;LOC_Os05g38530;LOC_Os01g02570;LOC_Os03g11910;LOC_Os01g02600;LOC_Os07g26660;LOC_Os01g02750;LOC_Os01g02580;LOC_Os11g45540;LOC_Os03g57720;LOC_Os01g02370;LOC_Os01g02400;LOC_Os05g17604
GO:0016410	N-acyltransferase activity	Molecular Function	11	1	0.00188652	LOC_Os10g11980;LOC_Os05g37660;LOC_Os08g02030;LOC_Os08g44840;LOC_Os10g01920;LOC_Os06g48560;LOC_Os04g51980;LOC_Os04g51660;LOC_Os06g49660;LOC_Os12g04080;LOC_Os08g01950
GO:0009044	xylan 1,4-beta-xylosidase activity	Molecular Function	5	1	0.00189053	LOC_Os01g19220;LOC_Os04g54810;LOC_Os02g51620;LOC_Os11g18730;LOC_Os11g19210
GO:0016165	linoleate 13S-lipoxygenase activity	Molecular Function	5	1	0.00189053	LOC_Os04g43200;LOC_Os08g39850;LOC_Os08g39840;LOC_Os12g26290;LOC_Os02g10120
GO:0009975	cyclase activity	Molecular Function	2	1	0.00195522	LOC_Os11g05290;LOC_Os01g33160
GO:0047216	inositol 3-alpha-galactosyltransferase activity	Molecular Function	2	1	0.00195522	LOC_Os03g20120;LOC_Os07g48830
GO:0018674	(S)-limonene 3-monooxygenase activity	Molecular Function	5	1	0.00235829	LOC_Os01g72760;LOC_Os04g27020;LOC_Os06g30179;LOC_Os02g36190;LOC_Os03g39650
GO:0004563	beta-N-acetylhexosaminidase activity	Molecular Function	3	1	0.00264344	LOC_Os01g66700;LOC_Os05g34320;LOC_Os07g38790
GO:0008515	sucrose transmembrane transporter activity	Molecular Function	3	1	0.00264344	LOC_Os08g42350;LOC_Os02g30910;LOC_Os12g29220
GO:0015081	sodium ion transmembrane transporter activity	Molecular Function	4	1	0.0026717	LOC_Os01g20160;LOC_Os12g42910;LOC_Os04g51820;LOC_Os01g34850
GO:0070290	N-acylphosphatidylethanolamine-specific phospholipase D activity	Molecular Function	4	1	0.0026717	LOC_Os03g27370;LOC_Os06g40170;LOC_Os08g31060;LOC_Os03g02740
GO:0042973	glucan endo-1,3-beta-D-glucosidase activity	Molecular Function	8	1	0.00308753	LOC_Os02g53200;LOC_Os01g71810;LOC_Os03g12140;LOC_Os03g51240;LOC_Os04g43390;LOC_Os10g07290;LOC_Os03g49610;LOC_Os01g71820
GO:0005546	phosphatidylinositol-4,5-bisphosphate binding	Molecular Function	4	1	0.00351663	LOC_Os03g27370;LOC_Os06g40170;LOC_Os03g02740;LOC_Os02g18410
GO:0033800	isoflavone 7-O-methyltransferase activity	Molecular Function	4	1	0.00351663	LOC_Os08g19420;LOC_Os05g43940;LOC_Os09g17560;LOC_Os10g02840
GO:0008569	minus-end-directed microtubule motor activity	Molecular Function	4	1	0.00351663	LOC_Os12g42160;LOC_Os12g36100;LOC_Os11g42800;LOC_Os03g02290
GO:0046556	alpha-L-arabinofuranosidase activity	Molecular Function	5	1	0.00353712	LOC_Os02g51620;LOC_Os11g18730;LOC_Os11g19210;LOC_Os01g19220;LOC_Os04g54810
GO:0080045	quercetin 3'-O-glucosyltransferase activity	Molecular Function	5	1	0.00353712	LOC_Os05g42070;LOC_Os01g53330;LOC_Os01g53430;LOC_Os05g45100;LOC_Os05g45090
GO:0015399	primary active transmembrane transporter activity	Molecular Function	5	1	0.00353712	LOC_Os12g09300;LOC_Os04g56470;LOC_Os02g01210;LOC_Os12g08090;LOC_Os04g41350
GO:0009055	electron carrier activity	Molecular Function	58	1	0.00385112	LOC_Os01g09830;LOC_Os07g38290;LOC_Os07g48330;LOC_Os03g04530;LOC_Os10g38110;LOC_Os10g33520;LOC_Os06g02019;LOC_Os07g23570;LOC_Os05g37250;LOC_Os02g36110;LOC_Os03g25490;LOC_Os09g35940;LOC_Os02g43660;LOC_Os11g29720;LOC_Os06g39780;LOC_Os01g63540;LOC_Os07g29960;LOC_Os02g36190;LOC_Os07g33620;LOC_Os04g46130;LOC_Os07g48510;LOC_Os04g10160;LOC_Os08g17160;LOC_Os05g11130;LOC_Os05g12040;LOC_Os04g53730;LOC_Os01g…
GO:0016746	transferase activity, transferring acyl groups	Molecular Function	9	1	0.00399492	LOC_Os01g66890;LOC_Os06g11660;LOC_Os10g30290;LOC_Os06g29180;LOC_Os02g01140;LOC_Os03g52070;LOC_Os02g52040;LOC_Os02g52010;LOC_Os03g64170
GO:0042389	omega-3 fatty acid desaturase activity	Molecular Function	3	1	0.00409074	LOC_Os03g18070;LOC_Os12g01370;LOC_Os07g49310
GO:0004321	fatty-acyl-CoA synthase activity	Molecular Function	3	1	0.00409074	LOC_Os10g42800;LOC_Os01g67540;LOC_Os07g17970
GO:0015112	nitrate transmembrane transporter activity	Molecular Function	9	1	0.00439028	LOC_Os04g40410;LOC_Os06g49220;LOC_Os10g40600;LOC_Os03g60850;LOC_Os10g02100;LOC_Os01g50820;LOC_Os02g46460;LOC_Os05g27010;LOC_Os01g36720
GO:0004497	monooxygenase activity	Molecular Function	30	1	0.00453763	LOC_Os06g30179;LOC_Os01g72760;LOC_Os03g14420;LOC_Os03g39650;LOC_Os11g29720;LOC_Os07g29960;LOC_Os01g43740;LOC_Os03g21400;LOC_Os07g33620;LOC_Os03g45619;LOC_Os10g05490;LOC_Os06g46680;LOC_Os01g12490;LOC_Os05g12040;LOC_Os07g48330;LOC_Os12g19470;LOC_Os06g02019;LOC_Os03g04530;LOC_Os10g38110;LOC_Os07g23570;LOC_Os03g25490;LOC_Os06g03930;LOC_Os01g43750;LOC_Os01g11340;LOC_Os04g41810;LOC_Os09g35940;LOC_Os10g…
GO:0016161	beta-amylase activity	Molecular Function	8	1	0.00476275	LOC_Os11g12620;LOC_Os03g22790;LOC_Os03g04770;LOC_Os10g32810;LOC_Os02g06140;LOC_Os10g41550;LOC_Os08g05290;LOC_Os11g12530
GO:0004871	signal transducer activity	Molecular Function	12	1	0.00498091	LOC_Os01g25560;LOC_Os01g72700;LOC_Os12g35670;LOC_Os12g41110;LOC_Os07g39850;LOC_Os12g41910;LOC_Os01g25540;LOC_Os11g02610;LOC_Os03g28300;LOC_Os10g38800;LOC_Os07g07990;LOC_Os01g74146
GO:0051119	sugar transmembrane transporter activity	Molecular Function	6	1	0.00531059	LOC_Os12g29220;LOC_Os02g36490;LOC_Os01g42090;LOC_Os01g65880;LOC_Os08g42350;LOC_Os02g30910
GO:0042834	peptidoglycan binding	Molecular Function	2	1	0.00569292	LOC_Os09g27890;LOC_Os02g53000
GO:0004322	ferroxidase activity	Molecular Function	2	1	0.00569292	LOC_Os11g01530;LOC_Os12g01530
GO:0031210	phosphatidylcholine binding	Molecular Function	2	1	0.00569292	LOC_Os03g37960;LOC_Os08g06550
GO:0015301	anion	Molecular Function	2	1	0.00569292	LOC_Os01g08020;LOC_Os12g37840
GO:0050525	cutinase activity	Molecular Function	2	1	0.00569292	LOC_Os05g44200;LOC_Os01g52770
GO:0080139	borate efflux transmembrane transporter activity	Molecular Function	2	1	0.00569292	LOC_Os01g08020;LOC_Os12g37840
GO:0047461	(+)-delta-cadinene synthase activity	Molecular Function	4	1	0.00571385	LOC_Os08g04500;LOC_Os03g24760;LOC_Os03g22620;LOC_Os04g27670
GO:0052689	carboxylic ester hydrolase activity	Molecular Function	8	1	0.00582536	LOC_Os03g62740;LOC_Os07g06860;LOC_Os12g04150;LOC_Os06g03890;LOC_Os05g11910;LOC_Os03g15270;LOC_Os01g46080;LOC_Os11g31940
GO:0016717	oxidoreductase activity, acting on paired donors, with oxidation of a pair of donors resulting in the reduction of molecular oxygen to two molecules of water	Molecular Function	3	1	0.00593526	LOC_Os07g49310;LOC_Os12g01370;LOC_Os03g18070
GO:0016166	phytoene dehydrogenase activity	Molecular Function	3	1	0.00593526	LOC_Os02g10120;LOC_Os08g39850;LOC_Os08g39840
GO:0050502	cis-zeatin O-beta-D-glucosyltransferase activity	Molecular Function	8	1	0.00641985	LOC_Os02g51910;LOC_Os01g45140;LOC_Os04g46990;LOC_Os05g08480;LOC_Os08g31200;LOC_Os04g25440;LOC_Os02g51900;LOC_Os02g11700
GO:0005199	structural constituent of cell wall	Molecular Function	8	1	0.00641985	LOC_Os07g07990;LOC_Os01g08470;LOC_Os01g60770;LOC_Os06g41700;LOC_Os07g37385;LOC_Os03g21820;LOC_Os02g51040;LOC_Os05g39990
GO:0080046	quercetin 4'-O-glucosyltransferase activity	Molecular Function	9	1	0.00684399	LOC_Os01g53330;LOC_Os05g45090;LOC_Os05g08480;LOC_Os05g42070;LOC_Os09g34214;LOC_Os02g11700;LOC_Os05g45100;LOC_Os01g53430;LOC_Os01g45140
GO:0015086	cadmium ion transmembrane transporter activity	Molecular Function	6	1	0.00691574	LOC_Os11g37700;LOC_Os08g43120;LOC_Os07g15370;LOC_Os01g08260;LOC_Os02g21340;LOC_Os09g16449
GO:0031418	L-ascorbic acid binding	Molecular Function	5	1	0.0070666	LOC_Os05g05670;LOC_Os09g27750;LOC_Os09g27820;LOC_Os03g55380;LOC_Os05g05680
GO:0080043	quercetin 3-O-glucosyltransferase activity	Molecular Function	10	1	0.0080576	LOC_Os01g53430;LOC_Os01g45140;LOC_Os05g45100;LOC_Os02g11700;LOC_Os05g42070;LOC_Os04g46990;LOC_Os05g45090;LOC_Os05g08480;LOC_Os01g53330;LOC_Os07g37690
GO:0052634	C-19 gibberellin 2-beta-dioxygenase activity	Molecular Function	3	1	0.00820206	LOC_Os02g41954;LOC_Os01g55240;LOC_Os01g22910
GO:0004650	polygalacturonase activity	Molecular Function	7	1	0.00850405	LOC_Os12g36810;LOC_Os01g19170;LOC_Os06g28670;LOC_Os03g03350;LOC_Os05g50960;LOC_Os02g03750;LOC_Os04g52320
GO:0050004	isoflavone 7-O-glucosyltransferase activity	Molecular Function	4	1	0.00867358	LOC_Os05g42070;LOC_Os01g53330;LOC_Os05g45100;LOC_Os05g45090
GO:0008762	UDP-N-acetylmuramate dehydrogenase activity	Molecular Function	6	1	0.00884536	LOC_Os01g18230;LOC_Os01g10110;LOC_Os08g35860;LOC_Os08g02230;LOC_Os10g34230;LOC_Os01g71310
GO:0045330	aspartyl esterase activity	Molecular Function	7	1	0.0103772	LOC_Os01g15039;LOC_Os01g21034;LOC_Os02g54190;LOC_Os01g57854;LOC_Os09g26360;LOC_Os05g44600;LOC_Os06g09340
GO:0005089	Rho guanyl-nucleotide exchange factor activity	Molecular Function	4	1	0.0104684	LOC_Os02g47420;LOC_Os05g38000;LOC_Os01g62990;LOC_Os04g47170
GO:0004722	protein serine/threonine phosphatase activity	Molecular Function	15	1	0.0106679	LOC_Os09g15670;LOC_Os05g38290;LOC_Os05g49730;LOC_Os11g05410;LOC_Os06g48300;LOC_Os03g13540;LOC_Os01g58640;LOC_Os01g46760;LOC_Os05g46040;LOC_Os11g01790;LOC_Os03g16170;LOC_Os12g01770;LOC_Os03g51530;LOC_Os01g40094;LOC_Os01g62760
GO:0050162	oxalate oxidase activity	Molecular Function	3	1	0.0109104	LOC_Os03g48780;LOC_Os06g44260;LOC_Os08g35760
GO:0033799	myricetin 3'-O-methyltransferase activity	Molecular Function	5	1	0.0109542	LOC_Os04g01470;LOC_Os05g43940;LOC_Os09g17560;LOC_Os08g19420;LOC_Os10g02840
GO:0030410	nicotianamine synthase activity	Molecular Function	2	1	0.0110518	LOC_Os03g19427;LOC_Os03g19420
GO:0045544	gibberellin 20-oxidase activity	Molecular Function	2	1	0.0110518	LOC_Os05g34854;LOC_Os03g63970
GO:0005452	inorganic anion exchanger activity	Molecular Function	2	1	0.0110518	LOC_Os01g08020;LOC_Os12g37840
GO:0043167	ion binding	Molecular Function	19	1	0.011624	LOC_Os04g10890;LOC_Os08g04560;LOC_Os04g43710;LOC_Os08g30550;LOC_Os01g19480;LOC_Os08g10310;LOC_Os02g06140;LOC_Os10g39740;LOC_Os07g18990;LOC_Os04g33920;LOC_Os05g17604;LOC_Os02g04170;LOC_Os07g07410;LOC_Os01g68740;LOC_Os01g12660;LOC_Os02g06930;LOC_Os08g31060;LOC_Os02g44820;LOC_Os05g50750
GO:0047274	galactinol-sucrose galactosyltransferase activity	Molecular Function	4	1	0.0124867	LOC_Os07g10840;LOC_Os12g02200;LOC_Os06g07600;LOC_Os01g10890
GO:0008131	primary amine oxidase activity	Molecular Function	5	1	0.0125202	LOC_Os08g35860;LOC_Os10g34230;LOC_Os01g71310;LOC_Os04g47300;LOC_Os01g10110
GO:0018685	alkane 1-monooxygenase activity	Molecular Function	6	1	0.0138075	LOC_Os05g37250;LOC_Os01g63930;LOC_Os02g44654;LOC_Os06g03930;LOC_Os10g38110;LOC_Os01g63540
GO:0004565	beta-galactosidase activity	Molecular Function	6	1	0.0138075	LOC_Os08g39860;LOC_Os01g39830;LOC_Os04g43390;LOC_Os03g06940;LOC_Os02g12730;LOC_Os03g49610
GO:0016621	cinnamoyl-CoA reductase activity	Molecular Function	10	1	0.0139977	LOC_Os06g21250;LOC_Os01g20780;LOC_Os02g51890;LOC_Os09g31522;LOC_Os02g40900;LOC_Os09g08720;LOC_Os03g17760;LOC_Os04g53860;LOC_Os06g11730;LOC_Os06g21230
GO:0080102	3-methylthiopropyl glucosinolate S-oxygenase activity	Molecular Function	3	1	0.0140745	LOC_Os07g02100;LOC_Os07g02120;LOC_Os07g02140
GO:0047617	acyl-CoA hydrolase activity	Molecular Function	3	1	0.0140745	LOC_Os07g05110;LOC_Os06g46350;LOC_Os03g57080
GO:0080103	4-methylthiopropyl glucosinolate S-oxygenase activity	Molecular Function	3	1	0.0140745	LOC_Os07g02100;LOC_Os07g02120;LOC_Os07g02140
GO:0080105	6-methylthiopropyl glucosinolate S-oxygenase activity	Molecular Function	3	1	0.0140745	LOC_Os07g02100;LOC_Os07g02120;LOC_Os07g02140
GO:0080107	8-methylthiopropyl glucosinolate S-oxygenase activity	Molecular Function	3	1	0.0140745	LOC_Os07g02120;LOC_Os07g02140;LOC_Os07g02100
GO:0016799	hydrolase activity, hydrolyzing N-glycosyl compounds	Molecular Function	3	1	0.0140745	LOC_Os03g01880;LOC_Os10g33900;LOC_Os03g49050
GO:0080106	7-methylthiopropyl glucosinolate S-oxygenase activity	Molecular Function	3	1	0.0140745	LOC_Os07g02120;LOC_Os07g02140;LOC_Os07g02100
GO:0005179	hormone activity	Molecular Function	3	1	0.0140745	LOC_Os12g35670;LOC_Os01g25540;LOC_Os01g25560
GO:0080104	5-methylthiopropyl glucosinolate S-oxygenase activity	Molecular Function	3	1	0.0140745	LOC_Os07g02140;LOC_Os07g02120;LOC_Os07g02100
GO:0030746	isoflavone 4'-O-methyltransferase activity	Molecular Function	4	1	0.0147374	LOC_Os09g17560;LOC_Os05g43940;LOC_Os10g02840;LOC_Os08g19420
GO:0050403	trans-zeatin O-beta-D-glucosyltransferase activity	Molecular Function	7	1	0.0163459	LOC_Os02g51900;LOC_Os02g11700;LOC_Os02g51910;LOC_Os01g45140;LOC_Os05g08480;LOC_Os08g31200;LOC_Os04g25440
GO:0046975	histone methyltransferase activity (H3-K36 specific)	Molecular Function	9	1	0.0169134	LOC_Os06g11730;LOC_Os06g21230;LOC_Os09g08720;LOC_Os02g40900;LOC_Os04g53860;LOC_Os03g17760;LOC_Os02g51890;LOC_Os01g20780;LOC_Os09g31522
GO:0009905	ent-copalyl diphosphate synthase activity	Molecular Function	2	1	0.0178812	LOC_Os04g09900;LOC_Os02g17780
GO:0050463	nitrate reductase [NAD(P)H] activity	Molecular Function	2	1	0.0178812	LOC_Os02g53130;LOC_Os08g36500
GO:0004557	alpha-galactosidase activity	Molecular Function	2	1	0.0178812	LOC_Os07g48160;LOC_Os10g35070
GO:0004030	aldehyde dehydrogenase [NAD(P)+] activity	Molecular Function	2	1	0.0178812	LOC_Os02g43280;LOC_Os04g45720
GO:0052748	baicalin beta-D-glucuronidase activity	Molecular Function	2	1	0.0178812	LOC_Os02g55870;LOC_Os06g08090
GO:0004566	beta-glucuronidase activity	Molecular Function	2	1	0.0178812	LOC_Os02g55870;LOC_Os06g08090
GO:0010486	manganese	Molecular Function	2	1	0.0178812	LOC_Os03g12530;LOC_Os01g03914
GO:0034593	phosphatidylinositol bisphosphate phosphatase activity	Molecular Function	2	1	0.0178812	LOC_Os01g51890;LOC_Os03g57950
GO:0051498	syn-copalyl diphosphate synthase activity	Molecular Function	2	1	0.0178812	LOC_Os02g17780;LOC_Os04g09900
GO:0016747	transferase activity, transferring acyl groups other than amino-acyl groups	Molecular Function	18	1	0.0179936	LOC_Os12g04080;LOC_Os08g01950;LOC_Os04g51980;LOC_Os06g14810;LOC_Os05g19910;LOC_Os08g44840;LOC_Os02g28220;LOC_Os09g33530;LOC_Os06g48560;LOC_Os04g51660;LOC_Os10g33370;LOC_Os06g49660;LOC_Os01g34560;LOC_Os05g37660;LOC_Os08g02030;LOC_Os10g01920;LOC_Os10g11980;LOC_Os06g39750
GO:0080044	quercetin 7-O-glucosyltransferase activity	Molecular Function	9	1	0.0180793	LOC_Os05g45100;LOC_Os01g45140;LOC_Os01g53430;LOC_Os02g11700;LOC_Os09g34214;LOC_Os05g45090;LOC_Os05g08480;LOC_Os05g42070;LOC_Os01g53330
GO:0046608	carotenoid isomerase activity	Molecular Function	8	1	0.0189678	LOC_Os02g51890;LOC_Os09g31522;LOC_Os06g21250;LOC_Os06g11730;LOC_Os06g21230;LOC_Os09g08720;LOC_Os04g53860;LOC_Os03g17760
GO:0015171	amino acid transmembrane transporter activity	Molecular Function	8	1	0.0189678	LOC_Os01g19770;LOC_Os03g19290;LOC_Os05g37470;LOC_Os06g12320;LOC_Os01g41420;LOC_Os01g63770;LOC_Os04g47420;LOC_Os12g06060
GO:0030761	8-hydroxyquercitin 8-O-methyltransferase activity	Molecular Function	4	1	0.0199668	LOC_Os09g17560;LOC_Os05g43940;LOC_Os10g02840;LOC_Os08g19420
GO:0008395	steroid hydroxylase activity	Molecular Function	5	1	0.0202833	LOC_Os06g39880;LOC_Os07g23570;LOC_Os01g43740;LOC_Os01g43750;LOC_Os03g25490
GO:0008374	O-acyltransferase activity	Molecular Function	7	1	0.0209132	LOC_Os08g44840;LOC_Os02g28220;LOC_Os12g04080;LOC_Os05g19910;LOC_Os04g51660;LOC_Os06g48560;LOC_Os04g51980
GO:1990136	linoleate 9S-lipoxygenase activity	Molecular Function	3	1	0.0218033	LOC_Os08g39850;LOC_Os02g10120;LOC_Os08g39840
GO:0046593	mandelonitrile lyase activity	Molecular Function	3	1	0.0218033	LOC_Os08g31030;LOC_Os01g57770;LOC_Os09g19930
GO:0004364	glutathione transferase activity	Molecular Function	8	1	0.0218515	LOC_Os01g49720;LOC_Os10g38710;LOC_Os01g49710;LOC_Os10g38360;LOC_Os03g04250;LOC_Os10g38730;LOC_Os10g38780;LOC_Os10g38470
GO:0046933	proton-transporting ATP synthase activity, rotational mechanism	Molecular Function	6	1	0.0223862	LOC_Os03g52650;LOC_Os04g42520;LOC_Os02g47320;LOC_Os02g40010;LOC_Os02g07870;LOC_Os04g16740
GO:0015250	water channel activity	Molecular Function	5	1	0.0226228	LOC_Os10g36924;LOC_Os07g26630;LOC_Os06g12310;LOC_Os01g74450;LOC_Os07g26660
GO:0050660	flavin adenine dinucleotide binding	Molecular Function	18	1	0.0242231	LOC_Os01g12490;LOC_Os08g31030;LOC_Os08g36500;LOC_Os07g02140;LOC_Os10g33520;LOC_Os02g53130;LOC_Os08g02230;LOC_Os08g35860;LOC_Os01g10110;LOC_Os09g19930;LOC_Os02g47790;LOC_Os07g02120;LOC_Os01g18230;LOC_Os05g26660;LOC_Os10g34230;LOC_Os01g71310;LOC_Os05g48200;LOC_Os07g02100
GO:0050577	GDP-L-fucose synthase activity	Molecular Function	2	1	0.0260409	LOC_Os06g44260;LOC_Os08g35760
GO:0080108	S-alkylthiohydroximate lyase activity	Molecular Function	2	1	0.0260409	LOC_Os11g42510;LOC_Os06g23684
GO:0016720	delta12-fatty acid dehydrogenase activity	Molecular Function	2	1	0.0260409	LOC_Os12g01370;LOC_Os07g49310
GO:0005504	fatty acid binding	Molecular Function	2	1	0.0260409	LOC_Os01g68589;LOC_Os07g18750
GO:0003999	adenine phosphoribosyltransferase activity	Molecular Function	2	1	0.0260409	LOC_Os02g40010;LOC_Os04g42520
GO:0008199	ferric iron binding	Molecular Function	2	1	0.0260409	LOC_Os12g01530;LOC_Os11g01530
GO:0030332	cyclin binding	Molecular Function	2	1	0.0260409	LOC_Os08g40170;LOC_Os09g28580
GO:0033855	nicotianamine aminotransferase activity	Molecular Function	2	1	0.0260409	LOC_Os06g23684;LOC_Os11g42510
GO:0052694	jasmonoyl-isoleucine-12-hydroxylase activity	Molecular Function	4	1	0.0262073	LOC_Os01g63930;LOC_Os01g63540;LOC_Os02g44654;LOC_Os05g37250
GO:0010328	auxin influx transmembrane transporter activity	Molecular Function	5	1	0.0278087	LOC_Os05g04600;LOC_Os01g63770;LOC_Os04g54930;LOC_Os02g46680;LOC_Os05g37470
GO:0016702	oxidoreductase activity, acting on single donors with incorporation of molecular oxygen, incorporation of two atoms of oxygen	Molecular Function	6	1	0.0289569	LOC_Os03g55380;LOC_Os10g40960;LOC_Os12g24800;LOC_Os12g26290;LOC_Os01g22910;LOC_Os01g08220
GO:0042800	histone methyltransferase activity (H3-K4 specific)	Molecular Function	9	1	0.0295876	LOC_Os01g20780;LOC_Os02g51890;LOC_Os09g31522;LOC_Os02g40900;LOC_Os09g08720;LOC_Os03g17760;LOC_Os04g53860;LOC_Os06g11730;LOC_Os06g21230
GO:0004623	phospholipase A2 activity	Molecular Function	4	1	0.029718	LOC_Os05g01810;LOC_Os01g73980;LOC_Os02g48450;LOC_Os03g15460
GO:0002020	protease binding	Molecular Function	4	1	0.029718	LOC_Os03g11910;LOC_Os03g16920;LOC_Os02g07870;LOC_Os05g38530
GO:0046961	proton-transporting ATPase activity, rotational mechanism	Molecular Function	5	1	0.0306617	LOC_Os04g16740;LOC_Os02g07870;LOC_Os02g40010;LOC_Os01g12260;LOC_Os04g42520
GO:0004185	serine-type carboxypeptidase activity	Molecular Function	9	1	0.0313188	LOC_Os04g32540;LOC_Os09g28840;LOC_Os11g31980;LOC_Os03g27480;LOC_Os01g22980;LOC_Os03g52070;LOC_Os01g61690;LOC_Os02g26480;LOC_Os11g10750
GO:0015036	disulfide oxidoreductase activity	Molecular Function	3	1	0.0314171	LOC_Os02g47790;LOC_Os05g26660;LOC_Os05g48200
GO:0016706	oxidoreductase activity, acting on paired donors, with incorporation or reduction of molecular oxygen, 2-oxoglutarate as one donor, and incorporation of one atom each of oxygen into both donors	Molecular Function	12	1	0.031762	LOC_Os01g70930;LOC_Os10g40960;LOC_Os05g34854;LOC_Os06g07941;LOC_Os05g05670;LOC_Os04g49210;LOC_Os09g27750;LOC_Os03g18030;LOC_Os09g27820;LOC_Os05g33310;LOC_Os03g55380;LOC_Os05g05680
GO:0042802	identical protein binding	Molecular Function	33	1	0.0323994	LOC_Os02g53840;LOC_Os04g46990;LOC_Os07g48760;LOC_Os09g36740;LOC_Os03g43440;LOC_Os09g26920;LOC_Os01g62990;LOC_Os10g25450;LOC_Os05g50750;LOC_Os05g38000;LOC_Os05g42070;LOC_Os01g55260;LOC_Os01g61900;LOC_Os04g47170;LOC_Os01g45140;LOC_Os04g52090;LOC_Os04g03050;LOC_Os01g12660;LOC_Os11g05320;LOC_Os04g48416;LOC_Os03g13540;LOC_Os03g06290;LOC_Os02g47420;LOC_Os02g16940;LOC_Os01g55150;LOC_Os03g55350;LOC_Os03g…
GO:0030766	11-O-demethyl-17-O-deacetylvindoline O-methyltransferase activity	Molecular Function	4	1	0.0334933	LOC_Os09g17560;LOC_Os05g43940;LOC_Os10g02840;LOC_Os08g19420
GO:0004837	tyrosine decarboxylase activity	Molecular Function	2	1	0.0353999	LOC_Os01g56380;LOC_Os08g04560
GO:0031957	very long-chain fatty acid-CoA ligase activity	Molecular Function	2	1	0.0353999	LOC_Os11g35400;LOC_Os05g04170
GO:0016765	transferase activity, transferring alkyl or aryl (other than methyl) groups	Molecular Function	2	1	0.0353999	LOC_Os04g08350;LOC_Os12g43130
GO:1990055	phenylacetaldehyde synthase activity	Molecular Function	2	1	0.0353999	LOC_Os08g04560;LOC_Os01g56380
GO:0004058	aromatic-L-amino-acid decarboxylase activity	Molecular Function	2	1	0.0353999	LOC_Os01g56380;LOC_Os08g04560
GO:0003712	transcription cofactor activity	Molecular Function	5	1	0.0369011	LOC_Os01g66890;LOC_Os11g05470;LOC_Os03g56950;LOC_Os06g30370;LOC_Os04g40630
GO:0043546	molybdopterin cofactor binding	Molecular Function	3	1	0.0369249	LOC_Os08g36500;LOC_Os03g57720;LOC_Os02g53130
GO:0008171	O-methyltransferase activity	Molecular Function	7	1	0.0372434	LOC_Os08g19420;LOC_Os05g01140;LOC_Os09g17560;LOC_Os04g01470;LOC_Os10g02840;LOC_Os06g20790;LOC_Os05g43940
GO:0004338	glucan exo-1,3-beta-glucosidase activity	Molecular Function	4	1	0.0375349	LOC_Os04g43390;LOC_Os03g53800;LOC_Os08g39860;LOC_Os03g49610
GO:0042299	lupeol synthase activity	Molecular Function	4	1	0.0375349	LOC_Os02g04760;LOC_Os11g37700;LOC_Os01g08260;LOC_Os09g16449
GO:0004620	phospholipase activity	Molecular Function	4	1	0.0375349	LOC_Os03g57080;LOC_Os06g46350;LOC_Os08g37180;LOC_Os07g05110
GO:0004713	protein tyrosine kinase activity	Molecular Function	20	1	0.0396547	LOC_Os01g53840;LOC_Os10g17960;LOC_Os04g58890;LOC_Os10g38800;LOC_Os04g47300;LOC_Os06g16300;LOC_Os01g02600;LOC_Os01g02570;LOC_Os01g26270;LOC_Os11g12620;LOC_Os04g52780;LOC_Os02g35760;LOC_Os07g05740;LOC_Os05g33080;LOC_Os03g20450;LOC_Os01g02400;LOC_Os08g07890;LOC_Os03g03570;LOC_Os07g29950;LOC_Os01g02750
GO:0015334	high-affinity oligopeptide transporter activity	Molecular Function	7	1	0.039743	LOC_Os02g46460;LOC_Os05g27010;LOC_Os05g34010;LOC_Os06g49220;LOC_Os10g40600;LOC_Os03g60850;LOC_Os10g02100
GO:0008081	phosphoric diester hydrolase activity	Molecular Function	4	1	0.0418437	LOC_Os09g36520;LOC_Os04g59310;LOC_Os04g59330;LOC_Os04g35100
GO:0005381	iron ion transmembrane transporter activity	Molecular Function	4	1	0.0418437	LOC_Os04g52310;LOC_Os06g36450;LOC_Os07g15370;LOC_Os09g23300
GO:0016874	ligase activity	Molecular Function	11	1	0.0428903	LOC_Os07g17970;LOC_Os06g09310;LOC_Os06g03580;LOC_Os02g33680;LOC_Os08g32060;LOC_Os02g52210;LOC_Os03g26870;LOC_Os01g67540;LOC_Os03g44810;LOC_Os03g04130;LOC_Os10g42800
GO:0035174	histone serine kinase activity	Molecular Function	3	1	0.0428914	LOC_Os01g50420;LOC_Os01g50400;LOC_Os07g02780
GO:0008889	glycerophosphodiester phosphodiesterase activity	Molecular Function	3	1	0.0428914	LOC_Os04g39610;LOC_Os02g31030;LOC_Os04g32320
GO:0015020	glucuronosyltransferase activity	Molecular Function	3	1	0.0428914	LOC_Os02g51910;LOC_Os02g51900;LOC_Os08g31200
GO:0015198	oligopeptide transporter activity	Molecular Function	5	1	0.0438652	LOC_Os06g13210;LOC_Os03g54000;LOC_Os08g38400;LOC_Os02g02460;LOC_Os12g12934
GO:0015174	basic amino acid transmembrane transporter activity	Molecular Function	5	1	0.0438652	LOC_Os12g09300;LOC_Os04g56470;LOC_Os02g01210;LOC_Os04g41350;LOC_Os12g08090
GO:0008734	L-aspartate oxidase activity	Molecular Function	1	1	0.0442315	LOC_Os02g04170
GO:0019210	kinase inhibitor activity	Molecular Function	1	1	0.0442315	LOC_Os05g32440
GO:0018826	methionine gamma-lyase activity	Molecular Function	1	1	0.0442315	LOC_Os10g37340
GO:0042284	sphingolipid delta-4 desaturase activity	Molecular Function	1	1	0.0442315	LOC_Os02g42660
GO:0016707	gibberellin 3-beta-dioxygenase activity	Molecular Function	1	1	0.0442315	LOC_Os01g08220
GO:0004474	malate synthase activity	Molecular Function	1	1	0.0442315	LOC_Os04g40990
GO:0050313	sulfur dioxygenase activity	Molecular Function	1	1	0.0442315	LOC_Os01g47690
GO:0018580	nitronate monooxygenase activity	Molecular Function	1	1	0.0442315	LOC_Os08g37874
GO:0005476	carnitine	Molecular Function	1	1	0.0442315	LOC_Os01g12520
GO:0080124	pheophytinase activity	Molecular Function	1	1	0.0442315	LOC_Os06g24730
GO:0004564	beta-fructofuranosidase activity	Molecular Function	1	1	0.0442315	LOC_Os02g01590
GO:0004451	isocitrate lyase activity	Molecular Function	1	1	0.0442315	LOC_Os07g34520
GO:0005201	extracellular matrix structural constituent	Molecular Function	1	1	0.0442315	LOC_Os08g41290
GO:0050203	oxalate-CoA ligase activity	Molecular Function	1	1	0.0442315	LOC_Os04g58710
GO:0047130	saccharopine dehydrogenase (NADP+, L-lysine-forming) activity	Molecular Function	1	1	0.0442315	LOC_Os02g54254
GO:0042937	tripeptide transporter activity	Molecular Function	7	1	0.0450642	LOC_Os05g27010;LOC_Os02g46460;LOC_Os05g34010;LOC_Os10g02100;LOC_Os03g60850;LOC_Os10g40600;LOC_Os06g49220
GO:0016709	oxidoreductase activity, acting on paired donors, with incorporation or reduction of molecular oxygen, NAD(P)H as one donor, and incorporation of one atom of oxygen	Molecular Function	9	1	0.0454319	LOC_Os07g29960;LOC_Os03g45619;LOC_Os10g05490;LOC_Os01g11340;LOC_Os10g37110;LOC_Os11g29720;LOC_Os05g11130;LOC_Os09g35940;LOC_Os06g46680
GO:0017091	AU-rich element binding	Molecular Function	2	1	0.0458363	LOC_Os06g11730;LOC_Os02g51890
GO:0009922	fatty acid elongase activity	Molecular Function	4	1	0.04642	LOC_Os06g14810;LOC_Os01g34560;LOC_Os10g33370;LOC_Os06g39750
GO:0004872	receptor activity	Molecular Function	5	1	0.0476224	LOC_Os06g36670;LOC_Os03g18600;LOC_Os02g08320;LOC_Os03g16920;LOC_Os05g38530
GO:0016760	cellulose synthase (UDP-forming) activity	Molecular Function	5	1	0.0476224	LOC_Os07g14850;LOC_Os09g30120;LOC_Os07g36690;LOC_Os12g36890;LOC_Os03g62090
GO:0042936	dipeptide transporter activity	Molecular Function	7	1	0.047888	LOC_Os10g40600;LOC_Os06g49220;LOC_Os10g02100;LOC_Os03g60850;LOC_Os05g27010;LOC_Os02g46460;LOC_Os05g34010
GO:0080030	methyl indole-3-acetate esterase activity	Molecular Function	3	1	0.0493072	LOC_Os11g02570;LOC_Os01g57770;LOC_Os03g10620
GO:0003950	NAD+ ADP-ribosyltransferase activity	Molecular Function	3	1	0.0493072	LOC_Os03g12820;LOC_Os04g59380;LOC_Os03g15790
GO:0080032	methyl jasmonate esterase activity	Molecular Function	3	1	0.0493072	LOC_Os11g02570;LOC_Os03g10620;LOC_Os01g57770
GO:0004784	superoxide dismutase activity	Molecular Function	3	1	0.0493072	LOC_Os01g18170;LOC_Os05g19670;LOC_Os07g46990
GO:0005200	structural constituent of cytoskeleton	Molecular Function	4	1	0.0512628	LOC_Os03g01530;LOC_Os10g36650;LOC_Os05g34170;LOC_Os12g06660
GO:0008878	glucose-1-phosphate adenylyltransferase activity	Molecular Function	2	1	0.0572366	LOC_Os03g52460;LOC_Os04g02050
GO:0008812	choline dehydrogenase activity	Molecular Function	2	1	0.0572366	LOC_Os08g31030;LOC_Os09g19930
GO:0015115	silicate transmembrane transporter activity	Molecular Function	2	1	0.0572366	LOC_Os06g12310;LOC_Os10g36924
GO:0042300	beta-amyrin synthase activity	Molecular Function	2	1	0.0572366	LOC_Os11g18366;LOC_Os02g04760
GO:0005215	transporter activity	Molecular Function	21	1	0.0603824	LOC_Os07g15370;LOC_Os03g60850;LOC_Os10g02100;LOC_Os08g32500;LOC_Os12g12934;LOC_Os01g47510;LOC_Os09g15170;LOC_Os06g45990;LOC_Os05g34010;LOC_Os07g26630;LOC_Os05g40010;LOC_Os02g13660;LOC_Os01g73980;LOC_Os08g06010;LOC_Os07g26660;LOC_Os01g42900;LOC_Os06g13210;LOC_Os06g49220;LOC_Os05g27010;LOC_Os05g01810;LOC_Os05g38260
GO:0044212	transcription regulatory region DNA binding	Molecular Function	9	1	0.063252	LOC_Os01g52160;LOC_Os12g40920;LOC_Os08g43600;LOC_Os02g52780;LOC_Os05g40960;LOC_Os04g36070;LOC_Os04g17100;LOC_Os01g61900;LOC_Os01g41200
GO:0015297	antiporter activity	Molecular Function	7	1	0.0671668	LOC_Os10g20470;LOC_Os09g35600;LOC_Os09g37600;LOC_Os03g42830;LOC_Os11g04380;LOC_Os04g48290;LOC_Os08g37432
GO:0004402	histone acetyltransferase activity	Molecular Function	4	1	0.0673712	LOC_Os01g66890;LOC_Os09g39910;LOC_Os06g01620;LOC_Os04g40630
GO:0030599	pectinesterase activity	Molecular Function	9	1	0.0690552	LOC_Os09g26360;LOC_Os08g01670;LOC_Os02g54190;LOC_Os01g57854;LOC_Os02g33380;LOC_Os01g15039;LOC_Os01g21034;LOC_Os05g44600;LOC_Os06g09340
GO:0004838	L-tyrosine	Molecular Function	2	1	0.0694952	LOC_Os06g23684;LOC_Os11g42510
GO:0004121	cystathionine beta-lyase activity	Molecular Function	2	1	0.0694952	LOC_Os11g42510;LOC_Os06g23684
GO:0030570	pectate lyase activity	Molecular Function	2	1	0.0694952	LOC_Os10g31910;LOC_Os04g05050
GO:0050362	L-tryptophan	Molecular Function	2	1	0.0694952	LOC_Os06g23684;LOC_Os11g42510
GO:0052580	(+)-pulegone reductase, (-)-menthone as substrate, activity	Molecular Function	2	1	0.0694952	LOC_Os12g12470;LOC_Os04g41960
GO:0004861	cyclin-dependent protein serine/threonine kinase inhibitor activity	Molecular Function	2	1	0.0694952	LOC_Os10g39920;LOC_Os09g28580
GO:0052579	(+)-pulegone reductase, (+)-isomenthone as substrate, activity	Molecular Function	2	1	0.0694952	LOC_Os12g12470;LOC_Os04g41960
GO:0008553	hydrogen-exporting ATPase activity, phosphorylative mechanism	Molecular Function	3	1	0.0711301	LOC_Os03g48310;LOC_Os03g08560;LOC_Os01g12260
GO:0004197	cysteine-type endopeptidase activity	Molecular Function	5	1	0.0740378	LOC_Os01g37910;LOC_Os03g27120;LOC_Os05g01810;LOC_Os02g48450;LOC_Os01g73980
GO:0008324	cation transmembrane transporter activity	Molecular Function	5	1	0.0740378	LOC_Os01g03914;LOC_Os01g20160;LOC_Os04g51820;LOC_Os01g34850;LOC_Os03g12530
GO:0000156	phosphorelay response regulator activity	Molecular Function	7	1	0.0744936	LOC_Os04g57720;LOC_Os11g04720;LOC_Os02g35180;LOC_Os12g04500;LOC_Os01g72330;LOC_Os04g36070;LOC_Os05g40960
GO:0050661	NADP binding	Molecular Function	8	1	0.0755072	LOC_Os04g38600;LOC_Os01g12490;LOC_Os07g02120;LOC_Os06g13720;LOC_Os09g12290;LOC_Os07g02100;LOC_Os01g27760;LOC_Os07g02140
GO:0050275	scopoletin glucosyltransferase activity	Molecular Function	3	1	0.0792154	LOC_Os01g45140;LOC_Os04g46990;LOC_Os05g42070
GO:0008429	phosphatidylethanolamine binding	Molecular Function	3	1	0.0792154	LOC_Os06g30370;LOC_Os05g39250;LOC_Os11g05470
GO:0016887	ATPase activity	Molecular Function	17	1	0.0813251	LOC_Os11g37700;LOC_Os12g36100;LOC_Os01g12660;LOC_Os01g47510;LOC_Os11g42800;LOC_Os08g43120;LOC_Os12g02980;LOC_Os09g29670;LOC_Os09g16449;LOC_Os02g21340;LOC_Os01g42900;LOC_Os05g44340;LOC_Os05g50750;LOC_Os03g02290;LOC_Os01g55260;LOC_Os12g39980;LOC_Os09g39910
GO:0016984	ribulose-bisphosphate carboxylase activity	Molecular Function	2	1	0.0825141	LOC_Os12g19470;LOC_Os12g17600
GO:0048032	galacturonate binding	Molecular Function	2	1	0.0825141	LOC_Os02g57840;LOC_Os03g02040
GO:0001872	(1->3)-beta-D-glucan binding	Molecular Function	2	1	0.0825141	LOC_Os03g54910;LOC_Os07g40940
GO:0080138	borate uptake transmembrane transporter activity	Molecular Function	2	1	0.0825141	LOC_Os06g12310;LOC_Os10g36924
GO:0030414	peptidase inhibitor activity	Molecular Function	2	1	0.0825141	LOC_Os03g03810;LOC_Os11g18660
GO:0016597	amino acid binding	Molecular Function	5	1	0.0843012	LOC_Os04g32110;LOC_Os08g34720;LOC_Os07g49390;LOC_Os09g12290;LOC_Os03g40100
GO:0015238	drug transmembrane transporter activity	Molecular Function	6	1	0.0844271	LOC_Os04g48290;LOC_Os08g37432;LOC_Os03g42830;LOC_Os09g37600;LOC_Os10g20470;LOC_Os09g35600
GO:0051743	red chlorophyll catabolite reductase activity	Molecular Function	1	1	0.0865077	LOC_Os10g25030
GO:0004360	glutamine-fructose-6-phosphate transaminase (isomerizing) activity	Molecular Function	1	1	0.0865077	LOC_Os12g03720
GO:0050269	coniferyl-aldehyde dehydrogenase activity	Molecular Function	1	1	0.0865077	LOC_Os06g39230
GO:0051777	ent-kaurenoate oxidase activity	Molecular Function	1	1	0.0865077	LOC_Os06g02019
GO:0016040	glutamate synthase (NADH) activity	Molecular Function	1	1	0.0865077	LOC_Os05g48200
GO:0090438	camelliol C synthase activity	Molecular Function	1	1	0.0865077	LOC_Os02g04760
GO:0015173	aromatic amino acid transmembrane transporter activity	Molecular Function	1	1	0.0865077	LOC_Os03g60260
GO:0043325	phosphatidylinositol-3,4-bisphosphate binding	Molecular Function	1	1	0.0865077	LOC_Os02g18410
GO:0010180	thioglucosidase binding	Molecular Function	1	1	0.0865077	LOC_Os03g14654
GO:0042972	licheninase activity	Molecular Function	1	1	0.0865077	LOC_Os01g71474
GO:0052745	inositol phosphate phosphatase activity	Molecular Function	1	1	0.0865077	LOC_Os07g37230
GO:0034256	chlorophyll(ide) b reductase activity	Molecular Function	1	1	0.0865077	LOC_Os03g45194
GO:0050306	sucrose 1F-fructosyltransferase activity	Molecular Function	1	1	0.0865077	LOC_Os02g01590
GO:0008752	FMN reductase activity	Molecular Function	1	1	0.0865077	LOC_Os01g72460
GO:0003938	IMP dehydrogenase activity	Molecular Function	1	1	0.0865077	LOC_Os08g37874
GO:0033760	2'-deoxymugineic-acid 2'-dioxygenase activity	Molecular Function	1	1	0.0865077	LOC_Os07g07410
GO:0050242	pyruvate, phosphate dikinase activity	Molecular Function	1	1	0.0865077	LOC_Os05g33570
GO:0003863	3-methyl-2-oxobutanoate dehydrogenase (2-methylpropanoyl-transferring) activity	Molecular Function	1	1	0.0865077	LOC_Os12g08260
GO:0008419	RNA lariat debranching enzyme activity	Molecular Function	1	1	0.0865077	LOC_Os03g51530
GO:0018708	thiol S-methyltransferase activity	Molecular Function	1	1	0.0865077	LOC_Os03g62670
GO:0004396	hexokinase activity	Molecular Function	1	1	0.0865077	LOC_Os01g71320
GO:0047100	glyceraldehyde-3-phosphate dehydrogenase (NADP+) (phosphorylating) activity	Molecular Function	1	1	0.0865077	LOC_Os04g38600
GO:0080013	(E,E)-geranyllinalool synthase activity	Molecular Function	1	1	0.0865077	LOC_Os05g44210
GO:0032441	pheophorbide a oxygenase activity	Molecular Function	1	1	0.0865077	LOC_Os03g05310
GO:0015169	glycerol-3-phosphate transmembrane transporter activity	Molecular Function	1	1	0.0865077	LOC_Os08g06010
GO:0004632	phosphopantothenate--cysteine ligase activity	Molecular Function	1	1	0.0865077	LOC_Os02g36550
GO:0008447	L-ascorbate oxidase activity	Molecular Function	1	1	0.0865077	LOC_Os06g37150
GO:0005547	phosphatidylinositol-3,4,5-trisphosphate binding	Molecular Function	1	1	0.0865077	LOC_Os02g18410
GO:0004587	ornithine-oxo-acid transaminase activity	Molecular Function	1	1	0.0865077	LOC_Os03g44150
GO:0016301	kinase activity	Molecular Function	60	1	0.0866166	LOC_Os08g39590;LOC_Os12g33070;LOC_Os05g38000;LOC_Os12g02710;LOC_Os02g41510;LOC_Os11g42450;LOC_Os03g05440;LOC_Os01g68730;LOC_Os08g37940;LOC_Os09g16950;LOC_Os05g33570;LOC_Os02g58390;LOC_Os04g12540;LOC_Os11g42970;LOC_Os02g40260;LOC_Os02g47420;LOC_Os04g41900;LOC_Os03g45720;LOC_Os02g06150;LOC_Os08g04430;LOC_Os04g51130;LOC_Os09g38910;LOC_Os03g48710;LOC_Os01g03940;LOC_Os01g07360;LOC_Os10g25674;LOC_Os05g…
GO:0015204	urea transmembrane transporter activity	Molecular Function	3	1	0.0876794	LOC_Os10g36924;LOC_Os01g74450;LOC_Os06g12310
GO:0016705	oxidoreductase activity, acting on paired donors, with incorporation or reduction of molecular oxygen	Molecular Function	27	1	0.089205	LOC_Os11g29720;LOC_Os06g39880;LOC_Os03g14420;LOC_Os03g39650;LOC_Os01g72760;LOC_Os06g30179;LOC_Os06g46680;LOC_Os10g05490;LOC_Os03g21400;LOC_Os07g33620;LOC_Os03g45619;LOC_Os07g29960;LOC_Os01g43740;LOC_Os10g38110;LOC_Os03g04530;LOC_Os06g02019;LOC_Os07g48330;LOC_Os05g12040;LOC_Os01g12490;LOC_Os09g10340;LOC_Os02g44654;LOC_Os09g35940;LOC_Os10g37110;LOC_Os01g43750;LOC_Os06g03930;LOC_Os03g25490;LOC_Os07g…
GO:0036201	ent-isokaurene C2-hydroxylase activity	Molecular Function	5	1	0.0896992	LOC_Os03g39650;LOC_Os01g72760;LOC_Os04g27020;LOC_Os02g36190;LOC_Os06g30179
GO:0004857	enzyme inhibitor activity	Molecular Function	9	1	0.0919059	LOC_Os08g01670;LOC_Os03g38170;LOC_Os09g26360;LOC_Os02g54190;LOC_Os06g09340;LOC_Os01g57854;LOC_Os01g15039;LOC_Os01g21034;LOC_Os02g33380
GO:0019199	transmembrane receptor protein kinase activity	Molecular Function	8	1	0.0938751	LOC_Os11g36160;LOC_Os01g33950;LOC_Os01g53840;LOC_Os03g43670;LOC_Os03g40100;LOC_Os04g32110;LOC_Os11g45540;LOC_Os04g52780
GO:0043424	protein histidine kinase binding	Molecular Function	7	1	0.0947797	LOC_Os12g03040;LOC_Os07g48450;LOC_Os11g03300;LOC_Os03g60080;LOC_Os09g19710;LOC_Os05g34830;LOC_Os11g03370
GO:0004672	protein kinase activity	Molecular Function	66	1	0.0951146	LOC_Os12g08760;LOC_Os11g06730;LOC_Os01g02600;LOC_Os05g25350;LOC_Os07g49114;LOC_Os01g42294;LOC_Os06g21230;LOC_Os03g57780;LOC_Os08g08140;LOC_Os04g28780;LOC_Os05g42230;LOC_Os07g35630;LOC_Os05g33690;LOC_Os10g38800;LOC_Os02g40900;LOC_Os09g31522;LOC_Os03g10620;LOC_Os01g33080;LOC_Os03g21730;LOC_Os06g08100;LOC_Os07g08360;LOC_Os11g12530;LOC_Os05g47730;LOC_Os09g08720;LOC_Os07g14740;LOC_Os01g02580;LOC_Os06g…
GO:0016836	hydro-lyase activity	Molecular Function	2	1	0.096202	LOC_Os04g09900;LOC_Os02g17780
GO:0010484	H3 histone acetyltransferase activity	Molecular Function	2	1	0.096202	LOC_Os06g04870;LOC_Os06g04850
GO:0001047	core promoter binding	Molecular Function	2	1	0.096202	LOC_Os02g42380;LOC_Os11g07460
GO:0015105	arsenite transmembrane transporter activity	Molecular Function	2	1	0.096202	LOC_Os10g36924;LOC_Os06g12310
GO:0010011	auxin binding	Molecular Function	2	1	0.096202	LOC_Os05g37470;LOC_Os01g63770
GO:0016866	intramolecular transferase activity	Molecular Function	2	1	0.096202	LOC_Os11g18366;LOC_Os02g04760
GO:0022821	potassium ion antiporter activity	Molecular Function	2	1	0.096202	LOC_Os01g17214;LOC_Os11g04060
GO:0010314	phosphatidylinositol-5-phosphate binding	Molecular Function	3	1	0.0965051	LOC_Os04g17100;LOC_Os01g41200;LOC_Os01g52160
GO:0008422	beta-glucosidase activity	Molecular Function	3	1	0.0965051	LOC_Os01g59840;LOC_Os04g43390;LOC_Os08g39860
GO:0016298	lipase activity	Molecular Function	5	1	0.101016	LOC_Os03g62740;LOC_Os06g14630;LOC_Os01g57770;LOC_Os10g30290;LOC_Os02g01140
GO:0042626	ATPase activity, coupled to transmembrane movement of substances	Molecular Function	9	1	0.102908	LOC_Os04g54930;LOC_Os01g08260;LOC_Os02g21340;LOC_Os09g29670;LOC_Os01g42900;LOC_Os11g37700;LOC_Os08g43120;LOC_Os09g16449;LOC_Os02g46680
GO:0016791	phosphatase activity	Molecular Function	4	1	0.106353	LOC_Os05g44210;LOC_Os01g52230;LOC_Os01g58640;LOC_Os01g63580
GO:0003690	double-stranded DNA binding	Molecular Function	11	1	0.108673	LOC_Os06g11730;LOC_Os02g40900;LOC_Os03g17760;LOC_Os06g21250;LOC_Os01g11350;LOC_Os06g21230;LOC_Os09g08720;LOC_Os02g21090;LOC_Os04g53860;LOC_Os02g51890;LOC_Os09g31522
GO:0015140	malate transmembrane transporter activity	Molecular Function	2	1	0.110474	LOC_Os09g31130;LOC_Os08g39370
GO:0034278	stemar-13-ene synthase activity	Molecular Function	2	1	0.110474	LOC_Os11g28530;LOC_Os02g36264
GO:0034283	syn-stemod-13(17)-ene synthase activity	Molecular Function	2	1	0.110474	LOC_Os11g28530;LOC_Os02g36264
GO:0004144	diacylglycerol O-acyltransferase activity	Molecular Function	2	1	0.110474	LOC_Os01g25990;LOC_Os09g33530
GO:0034280	ent-sandaracopimaradiene synthase activity	Molecular Function	2	1	0.110474	LOC_Os11g28530;LOC_Os02g36264
GO:0008865	fructokinase activity	Molecular Function	2	1	0.110474	LOC_Os08g02120;LOC_Os01g71320
GO:0034281	ent-isokaurene synthase activity	Molecular Function	2	1	0.110474	LOC_Os02g36264;LOC_Os11g28530
GO:0016871	cycloartenol synthase activity	Molecular Function	2	1	0.110474	LOC_Os11g18366;LOC_Os02g04760
GO:0034282	ent-pimara-8(14),15-diene synthase activity	Molecular Function	2	1	0.110474	LOC_Os11g28530;LOC_Os02g36264
GO:0070001	aspartic-type peptidase activity	Molecular Function	4	1	0.113664	LOC_Os01g04710;LOC_Os06g02900;LOC_Os05g51220;LOC_Os09g25570
GO:0047701	beta-L-arabinosidase activity	Molecular Function	3	1	0.115169	LOC_Os03g49610;LOC_Os04g43390;LOC_Os08g39860
GO:0030170	pyridoxal phosphate binding	Molecular Function	10	1	0.117457	LOC_Os04g37480;LOC_Os01g56380;LOC_Os11g42510;LOC_Os12g08850;LOC_Os06g23684;LOC_Os12g40010;LOC_Os04g08350;LOC_Os03g44150;LOC_Os10g37340;LOC_Os08g04560
GO:0046983	protein dimerization activity	Molecular Function	51	1	0.12194	LOC_Os01g13520;LOC_Os03g51910;LOC_Os02g45010;LOC_Os04g38780;LOC_Os11g38870;LOC_Os02g13520;LOC_Os07g43120;LOC_Os12g40900;LOC_Os11g05640;LOC_Os06g44320;LOC_Os04g53990;LOC_Os02g56120;LOC_Os05g43940;LOC_Os02g45170;LOC_Os01g06640;LOC_Os02g21090;LOC_Os08g41320;LOC_Os02g49480;LOC_Os10g02840;LOC_Os12g40890;LOC_Os02g17680;LOC_Os11g32100;LOC_Os07g47960;LOC_Os03g56950;LOC_Os02g55250;LOC_Os06g41060;LOC_Os09g…
GO:0033907	beta-D-fucosidase activity	Molecular Function	3	1	0.12497	LOC_Os03g49610;LOC_Os04g43390;LOC_Os08g39860
GO:0080083	beta-gentiobiose beta-glucosidase activity	Molecular Function	3	1	0.12497	LOC_Os08g39860;LOC_Os04g43390;LOC_Os03g49610
GO:0004812	aminoacyl-tRNA ligase activity	Molecular Function	3	1	0.12497	LOC_Os10g40600;LOC_Os03g53800;LOC_Os09g12290
GO:0030151	molybdenum ion binding	Molecular Function	2	1	0.125253	LOC_Os08g36500;LOC_Os02g53130
GO:0034279	syn-pimara-7,15-diene synthase activity	Molecular Function	2	1	0.125253	LOC_Os11g28530;LOC_Os02g36264
GO:0047782	coniferin beta-glucosidase activity	Molecular Function	2	1	0.125253	LOC_Os04g43390;LOC_Os03g49610
GO:0015168	glycerol transmembrane transporter activity	Molecular Function	2	1	0.125253	LOC_Os06g12310;LOC_Os10g36924
GO:0009703	nitrate reductase (NADH) activity	Molecular Function	2	1	0.125253	LOC_Os02g53130;LOC_Os08g36500
GO:0004864	protein phosphatase inhibitor activity	Molecular Function	2	1	0.125253	LOC_Os03g18600;LOC_Os06g36670
GO:0004467	long-chain fatty acid-CoA ligase activity	Molecular Function	2	1	0.125253	LOC_Os05g04170;LOC_Os11g35400
GO:0000062	fatty-acyl-CoA binding	Molecular Function	2	1	0.125253	LOC_Os03g37960;LOC_Os08g06550
GO:0003825	alpha,alpha-trehalose-phosphate synthase (UDP-forming) activity	Molecular Function	2	1	0.125253	LOC_Os05g44210;LOC_Os02g54820
GO:0004069	L-aspartate	Molecular Function	2	1	0.125253	LOC_Os06g23684;LOC_Os11g42510
GO:0047268	galactinol-raffinose galactosyltransferase activity	Molecular Function	1	1	0.126915	LOC_Os07g10840
GO:0010296	prenylcysteine methylesterase activity	Molecular Function	1	1	0.126915	LOC_Os01g45460
GO:0052731	phosphocholine phosphatase activity	Molecular Function	1	1	0.126915	LOC_Os01g52230
GO:0005083	small GTPase regulator activity	Molecular Function	1	1	0.126915	LOC_Os09g25860
GO:0019148	D-cysteine desulfhydrase activity	Molecular Function	1	1	0.126915	LOC_Os03g05310
GO:0047889	ferredoxin-nitrate reductase activity	Molecular Function	1	1	0.126915	LOC_Os01g25484
GO:0050421	nitrite reductase (NO-forming) activity	Molecular Function	1	1	0.126915	LOC_Os01g25484
GO:0050253	retinyl-palmitate esterase activity	Molecular Function	1	1	0.126915	LOC_Os03g10620
GO:0052732	phosphoethanolamine phosphatase activity	Molecular Function	1	1	0.126915	LOC_Os01g52230
GO:0016767	geranylgeranyl-diphosphate geranylgeranyltransferase activity	Molecular Function	1	1	0.126915	LOC_Os12g43130
GO:0015099	nickel cation transmembrane transporter activity	Molecular Function	1	1	0.126915	LOC_Os06g36450
GO:0004612	phosphoenolpyruvate carboxykinase (ATP) activity	Molecular Function	1	1	0.126915	LOC_Os03g15050
GO:0008660	1-aminocyclopropane-1-carboxylate deaminase activity	Molecular Function	1	1	0.126915	LOC_Os03g05310
GO:0005094	Rho GDP-dissociation inhibitor activity	Molecular Function	1	1	0.126915	LOC_Os01g68540
GO:0016838	carbon-oxygen lyase activity, acting on phosphates	Molecular Function	1	1	0.126915	LOC_Os04g27190
GO:0048307	ferredoxin-nitrite reductase activity	Molecular Function	1	1	0.126915	LOC_Os01g25484
GO:0004617	phosphoglycerate dehydrogenase activity	Molecular Function	1	1	0.126915	LOC_Os08g34720
GO:0000293	ferric-chelate reductase activity	Molecular Function	1	1	0.126915	LOC_Os04g48930
GO:0008115	sarcosine oxidase activity	Molecular Function	1	1	0.126915	LOC_Os09g32290
GO:0008696	4-amino-4-deoxychorismate lyase activity	Molecular Function	1	1	0.126915	LOC_Os05g15530
GO:0005290	L-histidine transmembrane transporter activity	Molecular Function	1	1	0.126915	LOC_Os01g12520
GO:0000064	L-ornithine transmembrane transporter activity	Molecular Function	1	1	0.126915	LOC_Os01g12520
GO:0015087	cobalt ion transmembrane transporter activity	Molecular Function	1	1	0.126915	LOC_Os06g36450
GO:0008863	formate dehydrogenase (NAD+) activity	Molecular Function	1	1	0.126915	LOC_Os06g29180
GO:0003955	NAD(P)H dehydrogenase (quinone) activity	Molecular Function	1	1	0.126915	LOC_Os01g72460
GO:0045486	naringenin 3-dioxygenase activity	Molecular Function	1	1	0.126915	LOC_Os04g49210
GO:0043023	ribosomal large subunit binding	Molecular Function	1	1	0.126915	LOC_Os01g17330
GO:0035251	UDP-glucosyltransferase activity	Molecular Function	8	1	0.137508	LOC_Os04g20400;LOC_Os05g08750;LOC_Os07g38790;LOC_Os05g45140;LOC_Os04g44354;LOC_Os07g31960;LOC_Os07g32010;LOC_Os07g30620
GO:0015181	arginine transmembrane transporter activity	Molecular Function	2	1	0.140465	LOC_Os01g12520;LOC_Os12g06060
GO:0016208	AMP binding	Molecular Function	2	1	0.140465	LOC_Os03g04130;LOC_Os04g58710
GO:0008271	secondary active sulfate transmembrane transporter activity	Molecular Function	2	1	0.140465	LOC_Os03g06520;LOC_Os03g09940
GO:0047668	amygdalin beta-glucosidase activity	Molecular Function	2	1	0.140465	LOC_Os04g43390;LOC_Os03g49610
GO:0016656	monodehydroascorbate reductase (NADH) activity	Molecular Function	2	1	0.140465	LOC_Os08g36680;LOC_Os02g47790
GO:0050224	prunasin beta-glucosidase activity	Molecular Function	2	1	0.140465	LOC_Os03g49610;LOC_Os04g43390
GO:0009899	ent-kaurene synthase activity	Molecular Function	2	1	0.140465	LOC_Os02g36264;LOC_Os11g28530
GO:0015189	L-lysine transmembrane transporter activity	Molecular Function	2	1	0.140465	LOC_Os12g06060;LOC_Os01g12520
GO:0003697	single-stranded DNA binding	Molecular Function	11	1	0.141804	LOC_Os06g11730;LOC_Os02g40900;LOC_Os03g17760;LOC_Os06g21250;LOC_Os06g21230;LOC_Os01g71690;LOC_Os02g21090;LOC_Os09g08720;LOC_Os04g53860;LOC_Os02g51890;LOC_Os09g31522
GO:0030554	adenyl nucleotide binding	Molecular Function	4	1	0.153281	LOC_Os01g44250;LOC_Os01g44360;LOC_Os05g32860;LOC_Os02g57280
GO:0004567	beta-mannosidase activity	Molecular Function	2	1	0.156043	LOC_Os04g43390;LOC_Os03g49610
GO:0015116	sulfate transmembrane transporter activity	Molecular Function	2	1	0.156043	LOC_Os03g06520;LOC_Os03g09940
GO:0010427	abscisic acid binding	Molecular Function	2	1	0.156043	LOC_Os06g36670;LOC_Os03g18600
GO:0010334	sesquiterpene synthase activity	Molecular Function	2	1	0.156043	LOC_Os04g27540;LOC_Os05g16980
GO:0034595	phosphatidylinositol phosphate 5-phosphatase activity	Molecular Function	2	1	0.156043	LOC_Os03g57950;LOC_Os01g51890
GO:0015299	solute	Molecular Function	5	1	0.159865	LOC_Os12g01770;LOC_Os10g20470;LOC_Os11g01790;LOC_Os08g37432;LOC_Os03g42830
GO:0004348	glucosylceramidase activity	Molecular Function	1	1	0.165536	LOC_Os08g01940
GO:0008898	S-adenosylmethionine-homocysteine S-methyltransferase activity	Molecular Function	1	1	0.165536	LOC_Os10g28630
GO:0004416	hydroxyacylglutathione hydrolase activity	Molecular Function	1	1	0.165536	LOC_Os01g47690
GO:0005261	cation channel activity	Molecular Function	1	1	0.165536	LOC_Os01g57370
GO:0004781	sulfate adenylyltransferase (ATP) activity	Molecular Function	1	1	0.165536	LOC_Os04g02050
GO:0016630	protochlorophyllide reductase activity	Molecular Function	1	1	0.165536	LOC_Os03g05310
GO:0016633	galactonolactone dehydrogenase activity	Molecular Function	1	1	0.165536	LOC_Os08g02230
GO:0016531	copper chaperone activity	Molecular Function	1	1	0.165536	LOC_Os02g55134
GO:0016205	selenocysteine methyltransferase activity	Molecular Function	1	1	0.165536	LOC_Os10g28630
GO:0008381	mechanically-gated ion channel activity	Molecular Function	1	1	0.165536	LOC_Os02g44770
GO:0004748	ribonucleoside-diphosphate reductase activity, thioredoxin disulfide as acceptor	Molecular Function	1	1	0.165536	LOC_Os06g03720
GO:0080049	L-gulono-1,4-lactone dehydrogenase activity	Molecular Function	1	1	0.165536	LOC_Os08g02230
GO:0047763	caffeate O-methyltransferase activity	Molecular Function	1	1	0.165536	LOC_Os04g01470
GO:0004764	shikimate 3-dehydrogenase (NADP+) activity	Molecular Function	1	1	0.165536	LOC_Os01g27760
GO:0000249	C-22 sterol desaturase activity	Molecular Function	1	1	0.165536	LOC_Os01g11340
GO:0000234	phosphoethanolamine N-methyltransferase activity	Molecular Function	1	1	0.165536	LOC_Os05g47540
GO:0043765	T/G mismatch-specific endonuclease activity	Molecular Function	1	1	0.165536	LOC_Os04g55850
GO:0044183	protein binding involved in protein folding	Molecular Function	1	1	0.165536	LOC_Os05g48340
GO:0052667	phosphomethylethanolamine N-methyltransferase activity	Molecular Function	1	1	0.165536	LOC_Os05g47540
GO:0016833	oxo-acid-lyase activity	Molecular Function	1	1	0.165536	LOC_Os12g08760
GO:0090416	nicotinate transporter activity	Molecular Function	1	1	0.165536	LOC_Os03g43720
GO:0090417	N-methylnicotinate transporter activity	Molecular Function	1	1	0.165536	LOC_Os03g43720
GO:0051753	mannan synthase activity	Molecular Function	3	1	0.16686	LOC_Os12g36890;LOC_Os02g51060;LOC_Os07g36690
GO:0003729	mRNA binding	Molecular Function	9	1	0.168311	LOC_Os02g51890;LOC_Os09g31522;LOC_Os09g08720;LOC_Os01g21420;LOC_Os04g53860;LOC_Os06g21230;LOC_Os06g21250;LOC_Os03g17760;LOC_Os06g11730
GO:0009674	potassium	Molecular Function	2	1	0.171926	LOC_Os04g32920;LOC_Os09g27580
GO:0047893	flavonol 3-O-glucosyltransferase activity	Molecular Function	2	1	0.171926	LOC_Os01g45140;LOC_Os05g42070
GO:0080031	methyl salicylate esterase activity	Molecular Function	2	1	0.171926	LOC_Os01g57770;LOC_Os03g10620
GO:0003682	chromatin binding	Molecular Function	38	1	0.177069	LOC_Os12g33070;LOC_Os08g33660;LOC_Os01g45090;LOC_Os05g49240;LOC_Os05g50340;LOC_Os04g42950;LOC_Os05g10690;LOC_Os03g45194;LOC_Os07g37210;LOC_Os09g23620;LOC_Os05g37060;LOC_Os02g41510;LOC_Os12g37970;LOC_Os12g41910;LOC_Os01g43230;LOC_Os02g49986;LOC_Os01g51260;LOC_Os03g20090;LOC_Os05g50350;LOC_Os05g51160;LOC_Os12g03150;LOC_Os01g09640;LOC_Os01g02740;LOC_Os02g04640;LOC_Os01g64360;LOC_Os05g40960;LOC_Os02g…
GO:0036202	ent-cassa-12,15-diene 11-hydroxylase activity	Molecular Function	3	1	0.177909	LOC_Os03g14420;LOC_Os06g39780;LOC_Os02g36110
GO:0008061	chitin binding	Molecular Function	5	1	0.182016	LOC_Os01g53840;LOC_Os04g41640;LOC_Os11g37950;LOC_Os04g41620;LOC_Os05g33130
GO:0004124	cysteine synthase activity	Molecular Function	2	1	0.188055	LOC_Os04g08350;LOC_Os04g08390
GO:0080054	low-affinity nitrate transmembrane transporter activity	Molecular Function	2	1	0.188055	LOC_Os05g34010;LOC_Os10g40600
GO:0080079	cellobiose glucosidase activity	Molecular Function	2	1	0.188055	LOC_Os03g49610;LOC_Os04g43390
GO:0000987	core promoter proximal region sequence-specific DNA binding	Molecular Function	2	1	0.188055	LOC_Os02g42380;LOC_Os11g07460
GO:0080019	fatty-acyl-CoA reductase (alcohol-forming) activity	Molecular Function	3	1	0.189151	LOC_Os09g39410;LOC_Os08g44360;LOC_Os04g28520
GO:0022857	transmembrane transporter activity	Molecular Function	5	1	0.189641	LOC_Os02g36490;LOC_Os03g43720;LOC_Os08g32500;LOC_Os09g15170;LOC_Os09g35600
GO:0051015	actin filament binding	Molecular Function	4	1	0.197251	LOC_Os10g22520;LOC_Os01g33080;LOC_Os04g45000;LOC_Os04g38810
GO:0019903	protein phosphatase binding	Molecular Function	3	1	0.200568	LOC_Os04g47300;LOC_Os01g09580;LOC_Os05g43820
GO:0003887	DNA-directed DNA polymerase activity	Molecular Function	3	1	0.200568	LOC_Os12g10670;LOC_Os12g13950;LOC_Os02g30800
GO:0004176	ATP-dependent peptidase activity	Molecular Function	3	1	0.200568	LOC_Os02g32520;LOC_Os06g12370;LOC_Os05g44340
GO:0052642	lysophosphatidic acid phosphatase activity	Molecular Function	1	1	0.20245	LOC_Os03g63580
GO:0032934	sterol binding	Molecular Function	1	1	0.20245	LOC_Os01g25500
GO:0036209	9beta-pimara-7,15-diene oxidase activity	Molecular Function	1	1	0.20245	LOC_Os04g10160
GO:0016879	ligase activity, forming carbon-nitrogen bonds	Molecular Function	1	1	0.20245	LOC_Os04g58280
GO:0004534	5'-3' exoribonuclease activity	Molecular Function	1	1	0.20245	LOC_Os02g28074
GO:0050378	UDP-glucuronate 4-epimerase activity	Molecular Function	1	1	0.20245	LOC_Os09g32670
GO:0003796	lysozyme activity	Molecular Function	1	1	0.20245	LOC_Os01g64110
GO:0004802	transketolase activity	Molecular Function	1	1	0.20245	LOC_Os04g19740
GO:0003855	3-dehydroquinate dehydratase activity	Molecular Function	1	1	0.20245	LOC_Os01g27760
GO:0030527	structural constituent of chromatin	Molecular Function	1	1	0.20245	LOC_Os09g37910
GO:0004367	glycerol-3-phosphate dehydrogenase [NAD+] activity	Molecular Function	1	1	0.20245	LOC_Os01g71280
GO:0045543	gibberellin 2-beta-dioxygenase activity	Molecular Function	1	1	0.20245	LOC_Os07g01340
GO:0005093	Rab GDP-dissociation inhibitor activity	Molecular Function	1	1	0.20245	LOC_Os07g16970
GO:0036239	taxoid 7beta-hydroxylase activity	Molecular Function	1	1	0.20245	LOC_Os07g33620
GO:0000014	single-stranded DNA endodeoxyribonuclease activity	Molecular Function	1	1	0.20245	LOC_Os04g55850
GO:0016891	endoribonuclease activity, producing 5'-phosphomonoesters	Molecular Function	1	1	0.20245	LOC_Os04g55850
GO:0051538	3 iron, 4 sulfur cluster binding	Molecular Function	1	1	0.20245	LOC_Os05g48200
GO:0004056	argininosuccinate lyase activity	Molecular Function	1	1	0.20245	LOC_Os04g38600
GO:0003896	DNA primase activity	Molecular Function	1	1	0.20245	LOC_Os05g29010
GO:0030755	quercetin 3-O-methyltransferase activity	Molecular Function	1	1	0.20245	LOC_Os04g01470
GO:0004618	phosphoglycerate kinase activity	Molecular Function	1	1	0.20245	LOC_Os06g45710
GO:0035560	pheophoridase activity	Molecular Function	1	1	0.20245	LOC_Os11g02570
GO:0005385	zinc ion transmembrane transporter activity	Molecular Function	2	1	0.204378	LOC_Os04g52320;LOC_Os04g52310
GO:0018675	(S)-limonene 6-monooxygenase activity	Molecular Function	2	1	0.204378	LOC_Os06g30179;LOC_Os02g36190
GO:0016752	sinapoyltransferase activity	Molecular Function	2	1	0.204378	LOC_Os03g52070;LOC_Os02g26480
GO:0004575	sucrose alpha-glucosidase activity	Molecular Function	2	1	0.204378	LOC_Os02g01590;LOC_Os04g33740
GO:0004021	L-alanine	Molecular Function	2	1	0.204378	LOC_Os11g42510;LOC_Os06g23684
GO:0010301	xanthoxin dehydrogenase activity	Molecular Function	2	1	0.220847	LOC_Os03g61740;LOC_Os04g10010
GO:0005046	KDEL sequence binding	Molecular Function	2	1	0.220847	LOC_Os03g16920;LOC_Os05g38530
GO:0047203	13-hydroxylupinine O-tigloyltransferase activity	Molecular Function	2	1	0.220847	LOC_Os06g49660;LOC_Os01g41420
GO:0008134	transcription factor binding	Molecular Function	3	1	0.223854	LOC_Os08g02070;LOC_Os06g11330;LOC_Os04g38780
GO:0070402	NADPH binding	Molecular Function	3	1	0.223854	LOC_Os12g12470;LOC_Os04g45000;LOC_Os04g41960
GO:0047800	cysteamine dioxygenase activity	Molecular Function	3	1	0.223854	LOC_Os03g45210;LOC_Os12g42860;LOC_Os08g37470
GO:0008408	3'-5' exonuclease activity	Molecular Function	3	1	0.223854	LOC_Os04g58810;LOC_Os07g02150;LOC_Os08g34170
GO:0050734	hydroxycinnamoyltransferase activity	Molecular Function	4	1	0.225267	LOC_Os10g11980;LOC_Os06g49660;LOC_Os05g19910;LOC_Os08g44840
GO:0030247	polysaccharide binding	Molecular Function	12	1	0.225919	LOC_Os09g38910;LOC_Os11g35860;LOC_Os05g50490;LOC_Os01g26300;LOC_Os04g51040;LOC_Os01g02750;LOC_Os04g29680;LOC_Os06g25950;LOC_Os01g26270;LOC_Os04g20680;LOC_Os04g30030;LOC_Os10g07556
GO:0016829	lyase activity	Molecular Function	7	1	0.227366	LOC_Os08g31030;LOC_Os10g31910;LOC_Os09g19930;LOC_Os04g05050;LOC_Os10g33900;LOC_Os03g49050;LOC_Os03g01880
GO:0001072	RNA binding transcription antitermination factor activity	Molecular Function	5	1	0.22933	LOC_Os03g17760;LOC_Os02g21090;LOC_Os06g11730;LOC_Os06g21250;LOC_Os02g51890
GO:0004888	transmembrane signaling receptor activity	Molecular Function	4	1	0.234825	LOC_Os02g05940;LOC_Os02g05970;LOC_Os02g06140;LOC_Os02g06150
GO:0004540	ribonuclease activity	Molecular Function	3	1	0.235689	LOC_Os04g58810;LOC_Os08g34170;LOC_Os11g37950
GO:0008233	peptidase activity	Molecular Function	21	1	0.236621	LOC_Os03g46150;LOC_Os11g24070;LOC_Os01g12660;LOC_Os01g42860;LOC_Os03g01300;LOC_Os07g34850;LOC_Os05g42200;LOC_Os12g34430;LOC_Os12g02320;LOC_Os05g48330;LOC_Os07g07860;LOC_Os03g50960;LOC_Os03g20760;LOC_Os10g36160;LOC_Os02g32520;LOC_Os03g60840;LOC_Os05g50750;LOC_Os06g02780;LOC_Os01g59870;LOC_Os12g25090;LOC_Os02g26480
GO:0010279	indole-3-acetic acid amido synthetase activity	Molecular Function	2	1	0.237416	LOC_Os07g40290;LOC_Os01g09580
GO:0005337	nucleoside transmembrane transporter activity	Molecular Function	1	1	0.237732	LOC_Os07g37110
GO:0003849	3-deoxy-7-phosphoheptulonate synthase activity	Molecular Function	1	1	0.237732	LOC_Os10g41480
GO:0015562	efflux transmembrane transporter activity	Molecular Function	1	1	0.237732	LOC_Os03g12530
GO:0004412	homoserine dehydrogenase activity	Molecular Function	1	1	0.237732	LOC_Os09g12290
GO:2001080	chitosan binding	Molecular Function	1	1	0.237732	LOC_Os01g53840
GO:0004315	3-oxoacyl-[acyl-carrier-protein] synthase activity	Molecular Function	1	1	0.237732	LOC_Os07g42420
GO:0045485	omega-6 fatty acid desaturase activity	Molecular Function	1	1	0.237732	LOC_Os12g01370
GO:0015200	methylammonium transmembrane transporter activity	Molecular Function	1	1	0.237732	LOC_Os01g74450
GO:0019172	glyoxalase III activity	Molecular Function	1	1	0.237732	LOC_Os01g11860
GO:0016810	hydrolase activity, acting on carbon-nitrogen (but not peptide) bonds	Molecular Function	1	1	0.237732	LOC_Os06g10420
GO:0051739	ammonium transmembrane transporter activity	Molecular Function	1	1	0.237732	LOC_Os01g74450
GO:0046030	inositol trisphosphate phosphatase activity	Molecular Function	1	1	0.237732	LOC_Os03g57950
GO:0080025	phosphatidylinositol-3,5-bisphosphate binding	Molecular Function	1	1	0.237732	LOC_Os02g18410
GO:0019789	SUMO transferase activity	Molecular Function	1	1	0.237732	LOC_Os04g49130
GO:0008805	carbon-monoxide oxygenase activity	Molecular Function	1	1	0.237732	LOC_Os08g01140
GO:0036203	taxoid 14-beta-hydroxylase activity	Molecular Function	1	1	0.237732	LOC_Os07g33620
GO:0009001	serine O-acetyltransferase activity	Molecular Function	1	1	0.237732	LOC_Os01g52260
GO:0008725	DNA-3-methyladenine glycosylase activity	Molecular Function	1	1	0.237732	LOC_Os01g58550
GO:0030775	glucuronoxylan 4-O-methyltransferase activity	Molecular Function	1	1	0.237732	LOC_Os11g29780
GO:0004605	phosphatidate cytidylyltransferase activity	Molecular Function	1	1	0.237732	LOC_Os09g25860
GO:0047334	diphosphate-fructose-6-phosphate 1-phosphotransferase activity	Molecular Function	1	1	0.237732	LOC_Os06g22060
GO:0030246	carbohydrate binding	Molecular Function	16	1	0.244021	LOC_Os12g03720;LOC_Os04g38530;LOC_Os03g06940;LOC_Os08g02990;LOC_Os11g10560;LOC_Os06g17490;LOC_Os01g02370;LOC_Os11g45540;LOC_Os07g18230;LOC_Os08g03020;LOC_Os02g12730;LOC_Os04g48270;LOC_Os01g39830;LOC_Os07g04040;LOC_Os01g16310;LOC_Os03g14654
GO:0005509	calcium ion binding	Molecular Function	33	1	0.244421	LOC_Os01g26270;LOC_Os04g43200;LOC_Os09g28500;LOC_Os04g30030;LOC_Os09g38910;LOC_Os12g35610;LOC_Os05g26660;LOC_Os07g42730;LOC_Os12g41110;LOC_Os01g04330;LOC_Os02g06340;LOC_Os03g27370;LOC_Os02g18410;LOC_Os03g02740;LOC_Os11g35860;LOC_Os10g02680;LOC_Os06g46950;LOC_Os10g07556;LOC_Os09g30490;LOC_Os02g51750;LOC_Os03g61670;LOC_Os04g20680;LOC_Os04g58890;LOC_Os01g72530;LOC_Os03g15460;LOC_Os04g47300;LOC_Os01g…
GO:0050897	cobalt ion binding	Molecular Function	7	1	0.24722	LOC_Os01g44360;LOC_Os12g06060;LOC_Os06g13720;LOC_Os03g05310;LOC_Os04g16740;LOC_Os04g48930;LOC_Os01g54030
GO:0008559	xenobiotic-transporting ATPase activity	Molecular Function	3	1	0.24763	LOC_Os04g54930;LOC_Os05g04600;LOC_Os02g46680
GO:0008308	voltage-gated anion channel activity	Molecular Function	2	1	0.254044	LOC_Os07g08350;LOC_Os01g28840
GO:0045551	cinnamyl-alcohol dehydrogenase activity	Molecular Function	2	1	0.254044	LOC_Os09g23560;LOC_Os06g46920
GO:0003854	3-beta-hydroxy-delta5-steroid dehydrogenase activity	Molecular Function	2	1	0.254044	LOC_Os09g08720;LOC_Os04g53860
GO:0008757	S-adenosylmethionine-dependent methyltransferase activity	Molecular Function	5	1	0.254205	LOC_Os06g13560;LOC_Os11g38860;LOC_Os05g01140;LOC_Os03g62670;LOC_Os06g20790
GO:0004499	N,N-dimethylaniline monooxygenase activity	Molecular Function	4	1	0.264032	LOC_Os01g12490;LOC_Os07g02140;LOC_Os07g02120;LOC_Os07g02100
GO:0051537	2 iron, 2 sulfur cluster binding	Molecular Function	4	1	0.264032	LOC_Os03g05310;LOC_Os01g47760;LOC_Os01g09830;LOC_Os03g57720
GO:0016491	oxidoreductase activity	Molecular Function	38	1	0.265623	LOC_Os11g30560;LOC_Os01g27230;LOC_Os04g31940;LOC_Os04g10010;LOC_Os03g44880;LOC_Os01g11590;LOC_Os03g03370;LOC_Os06g44300;LOC_Os06g46500;LOC_Os01g25500;LOC_Os10g25030;LOC_Os08g37130;LOC_Os07g42924;LOC_Os05g26660;LOC_Os09g20090;LOC_Os06g46920;LOC_Os04g37480;LOC_Os01g50900;LOC_Os03g61740;LOC_Os08g35160;LOC_Os07g02810;LOC_Os06g03720;LOC_Os09g07440;LOC_Os11g07912;LOC_Os03g18640;LOC_Os06g37150;LOC_Os02g…
GO:0018459	carveol dehydrogenase activity	Molecular Function	2	1	0.270695	LOC_Os03g61740;LOC_Os04g10010
GO:0018458	isopiperitenol dehydrogenase activity	Molecular Function	2	1	0.270695	LOC_Os04g10010;LOC_Os03g61740
GO:0005275	amine transmembrane transporter activity	Molecular Function	2	1	0.270695	LOC_Os04g56470;LOC_Os01g41420
GO:0072582	17-beta-hydroxysteroid dehydrogenase (NADP+) activity	Molecular Function	1	1	0.271454	LOC_Os11g30560
GO:0003954	NADH dehydrogenase activity	Molecular Function	1	1	0.271454	LOC_Os05g26660
GO:0004739	pyruvate dehydrogenase (acetyl-transferring) activity	Molecular Function	1	1	0.271454	LOC_Os06g13720
GO:0004034	aldose 1-epimerase activity	Molecular Function	1	1	0.271454	LOC_Os04g38530
GO:0003841	1-acylglycerol-3-phosphate O-acyltransferase activity	Molecular Function	1	1	0.271454	LOC_Os01g63580
GO:0004462	lactoylglutathione lyase activity	Molecular Function	1	1	0.271454	LOC_Os03g45720
GO:0015369	calcium	Molecular Function	1	1	0.271454	LOC_Os02g21009
GO:0008802	betaine-aldehyde dehydrogenase activity	Molecular Function	1	1	0.271454	LOC_Os06g39230
GO:0016652	oxidoreductase activity, acting on NAD(P)H, NAD(P) as acceptor	Molecular Function	1	1	0.271454	LOC_Os01g54030
GO:0010295	(+)-abscisic acid 8'-hydroxylase activity	Molecular Function	1	1	0.271454	LOC_Os02g47470
GO:0050373	UDP-arabinose 4-epimerase activity	Molecular Function	1	1	0.271454	LOC_Os05g51670
GO:0004478	methionine adenosyltransferase activity	Molecular Function	1	1	0.271454	LOC_Os01g18860
GO:0004473	malate dehydrogenase (decarboxylating) (NADP+) activity	Molecular Function	1	1	0.271454	LOC_Os01g54030
GO:0070524	11-beta-hydroxysteroid dehydrogenase (NADP+) activity	Molecular Function	1	1	0.271454	LOC_Os11g30560
GO:0072555	17-beta-ketosteroid reductase activity	Molecular Function	1	1	0.271454	LOC_Os11g30560
GO:0004072	aspartate kinase activity	Molecular Function	1	1	0.271454	LOC_Os09g12290
GO:0042349	guiding stereospecific synthesis activity	Molecular Function	1	1	0.271454	LOC_Os07g44370
GO:0000900	translation repressor activity, nucleic acid binding	Molecular Function	1	1	0.271454	LOC_Os06g11330
GO:0003883	CTP synthase activity	Molecular Function	1	1	0.271454	LOC_Os05g49770
GO:0004356	glutamate-ammonia ligase activity	Molecular Function	1	1	0.271454	LOC_Os03g12290
GO:0001653	peptide receptor activity	Molecular Function	4	1	0.273917	LOC_Os02g05940;LOC_Os02g06140;LOC_Os02g06150;LOC_Os02g05970
GO:0015293	symporter activity	Molecular Function	4	1	0.293859	LOC_Os01g63770;LOC_Os05g37470;LOC_Os02g36490;LOC_Os04g10690
GO:0008092	cytoskeletal protein binding	Molecular Function	3	1	0.296129	LOC_Os04g31940;LOC_Os05g38480;LOC_Os03g39020
GO:0019899	enzyme binding	Molecular Function	3	1	0.296129	LOC_Os10g38470;LOC_Os10g38360;LOC_Os10g38710
GO:0004471	malate dehydrogenase (decarboxylating) (NAD+) activity	Molecular Function	1	1	0.303685	LOC_Os01g54030
GO:0004792	thiosulfate sulfurtransferase activity	Molecular Function	1	1	0.303685	LOC_Os12g24020
GO:0008948	oxaloacetate decarboxylase activity	Molecular Function	1	1	0.303685	LOC_Os01g54030
GO:0044022	histone kinase activity (H3-S28 specific)	Molecular Function	1	1	0.303685	LOC_Os01g09580
GO:0045134	uridine-diphosphatase activity	Molecular Function	1	1	0.303685	LOC_Os12g02980
GO:0003886	DNA (cytosine-5-)-methyltransferase activity	Molecular Function	1	1	0.303685	LOC_Os10g01570
GO:0046906	tetrapyrrole binding	Molecular Function	1	1	0.303685	LOC_Os03g47620
GO:0004476	mannose-6-phosphate isomerase activity	Molecular Function	1	1	0.303685	LOC_Os01g03710
GO:0035175	histone kinase activity (H3-S10 specific)	Molecular Function	1	1	0.303685	LOC_Os01g09580
GO:0015291	secondary active transmembrane transporter activity	Molecular Function	1	1	0.303685	LOC_Os03g09940
GO:0071614	linoleic acid epoxygenase activity	Molecular Function	1	1	0.303685	LOC_Os04g43200
GO:0004382	guanosine-diphosphatase activity	Molecular Function	1	1	0.303685	LOC_Os12g02980
GO:0005085	guanyl-nucleotide exchange factor activity	Molecular Function	1	1	0.303685	LOC_Os02g47420
GO:1990137	plant seed peroxidase activity	Molecular Function	1	1	0.303685	LOC_Os04g43200
GO:0004747	ribokinase activity	Molecular Function	1	1	0.303685	LOC_Os08g02120
GO:0090450	inosine-diphosphatase activity	Molecular Function	1	1	0.303685	LOC_Os12g02980
GO:0016857	racemase and epimerase activity, acting on carbohydrates and derivatives	Molecular Function	1	1	0.303685	LOC_Os09g32670
GO:0018456	aryl-alcohol dehydrogenase (NAD+) activity	Molecular Function	1	1	0.303685	LOC_Os09g23560
GO:0004337	geranyltranstransferase activity	Molecular Function	1	1	0.303685	LOC_Os04g56230
GO:0004602	glutathione peroxidase activity	Molecular Function	2	1	0.303926	LOC_Os04g58720;LOC_Os03g04250
GO:0080131	hydroxyjasmonate sulfotransferase activity	Molecular Function	2	1	0.303926	LOC_Os07g05460;LOC_Os12g17160
GO:0016758	transferase activity, transferring hexosyl groups	Molecular Function	22	1	0.311488	LOC_Os02g51910;LOC_Os07g37690;LOC_Os02g51900;LOC_Os04g44354;LOC_Os07g31960;LOC_Os01g53430;LOC_Os04g20400;LOC_Os11g27370;LOC_Os07g32010;LOC_Os07g30620;LOC_Os05g45090;LOC_Os07g48370;LOC_Os05g45140;LOC_Os01g59840;LOC_Os02g11700;LOC_Os03g04720;LOC_Os05g42070;LOC_Os05g08480;LOC_Os01g53330;LOC_Os03g01800;LOC_Os05g45100;LOC_Os05g08750
GO:0000287	magnesium ion binding	Molecular Function	11	1	0.315448	LOC_Os05g16980;LOC_Os02g17780;LOC_Os03g22620;LOC_Os03g24760;LOC_Os04g27670;LOC_Os02g36264;LOC_Os04g27190;LOC_Os11g28530;LOC_Os04g09900;LOC_Os04g27540;LOC_Os08g04500
GO:0016413	O-acetyltransferase activity	Molecular Function	2	1	0.320447	LOC_Os10g01920;LOC_Os10g11980
GO:0015450	P-P-bond-hydrolysis-driven protein transmembrane transporter activity	Molecular Function	3	1	0.320614	LOC_Os03g19290;LOC_Os03g02390;LOC_Os01g19770
GO:0010329	auxin efflux transmembrane transporter activity	Molecular Function	3	1	0.332868	LOC_Os04g54930;LOC_Os05g04600;LOC_Os02g46680
GO:0043169	cation binding	Molecular Function	3	1	0.332868	LOC_Os03g04770;LOC_Os10g32810;LOC_Os10g41550
GO:0043495	protein anchor	Molecular Function	1	1	0.334491	LOC_Os03g52650
GO:0032794	GTPase activating protein binding	Molecular Function	1	1	0.334491	LOC_Os05g43820
GO:0004365	glyceraldehyde-3-phosphate dehydrogenase (NAD+) (phosphorylating) activity	Molecular Function	1	1	0.334491	LOC_Os04g38600
GO:0008441	3'(2'),5'-bisphosphate nucleotidase activity	Molecular Function	1	1	0.334491	LOC_Os07g37230
GO:0003978	UDP-glucose 4-epimerase activity	Molecular Function	1	1	0.334491	LOC_Os05g51670
GO:0018479	benzaldehyde dehydrogenase (NAD+) activity	Molecular Function	1	1	0.334491	LOC_Os03g57720
GO:0004351	glutamate decarboxylase activity	Molecular Function	1	1	0.334491	LOC_Os04g37480
GO:0008083	growth factor activity	Molecular Function	1	1	0.334491	LOC_Os03g47230
GO:0005536	glucose binding	Molecular Function	1	1	0.334491	LOC_Os06g07300
GO:0015398	high-affinity secondary active ammonium transmembrane transporter activity	Molecular Function	1	1	0.334491	LOC_Os05g39240
GO:0033897	ribonuclease T2 activity	Molecular Function	1	1	0.334491	LOC_Os08g33710
GO:0016619	malate dehydrogenase (decarboxylating) (NAD+) activity	Molecular Function	1	1	0.334491	LOC_Os01g54030
GO:0000250	lanosterol synthase activity	Molecular Function	1	1	0.334491	LOC_Os11g18366
GO:0005537	mannose binding	Molecular Function	1	1	0.334491	LOC_Os06g07300
GO:0030674	protein binding, bridging	Molecular Function	1	1	0.334491	LOC_Os10g22520
GO:0033613	activating transcription factor binding	Molecular Function	1	1	0.334491	LOC_Os08g43600
GO:0046029	mannitol dehydrogenase activity	Molecular Function	1	1	0.334491	LOC_Os09g23560
GO:0008398	sterol 14-demethylase activity	Molecular Function	1	1	0.334491	LOC_Os05g12040
GO:0051019	mitogen-activated protein kinase binding	Molecular Function	1	1	0.334491	LOC_Os01g55150
GO:0015083	aluminum ion transmembrane transporter activity	Molecular Function	1	1	0.334491	LOC_Os07g15370
GO:0045300	acyl-[acyl-carrier-protein] desaturase activity	Molecular Function	1	1	0.334491	LOC_Os08g10010
GO:0047681	aryl-alcohol dehydrogenase (NADP+) activity	Molecular Function	1	1	0.334491	LOC_Os09g23560
GO:0016831	carboxy-lyase activity	Molecular Function	2	1	0.336869	LOC_Os08g04560;LOC_Os01g56380
GO:1990135	flavonoid sulfotransferase activity	Molecular Function	2	1	0.336869	LOC_Os12g17160;LOC_Os07g05460
GO:0051287	NAD binding	Molecular Function	6	1	0.343981	LOC_Os08g34720;LOC_Os04g38600;LOC_Os02g04755;LOC_Os01g54030;LOC_Os01g71280;LOC_Os06g29180
GO:0016620	oxidoreductase activity, acting on the aldehyde or oxo group of donors, NAD or NADP as acceptor	Molecular Function	3	1	0.345113	LOC_Os04g45720;LOC_Os02g43280;LOC_Os04g28520
GO:0005198	structural molecule activity	Molecular Function	5	1	0.349593	LOC_Os04g55200;LOC_Os11g39450;LOC_Os04g30030;LOC_Os05g49300;LOC_Os04g46830
GO:0004805	trehalose-phosphatase activity	Molecular Function	2	1	0.353169	LOC_Os02g54820;LOC_Os02g51680
GO:0004518	nuclease activity	Molecular Function	3	1	0.357336	LOC_Os11g37950;LOC_Os08g44360;LOC_Os12g01830
GO:0031219	levanase activity	Molecular Function	1	1	0.363935	LOC_Os04g33740
GO:0071949	FAD binding	Molecular Function	1	1	0.363935	LOC_Os03g57720
GO:0018858	benzoate-CoA ligase activity	Molecular Function	1	1	0.363935	LOC_Os03g04130
GO:0010277	chlorophyllide a oxygenase [overall] activity	Molecular Function	1	1	0.363935	LOC_Os03g05310
GO:0008519	ammonium transmembrane transporter activity	Molecular Function	1	1	0.363935	LOC_Os05g39240
GO:0004629	phospholipase C activity	Molecular Function	1	1	0.363935	LOC_Os03g63580
GO:0030060	L-malate dehydrogenase activity	Molecular Function	1	1	0.363935	LOC_Os04g46560
GO:0030675	Rac GTPase activator activity	Molecular Function	1	1	0.363935	LOC_Os07g22580
GO:0050302	indole-3-acetaldehyde oxidase activity	Molecular Function	1	1	0.363935	LOC_Os03g57720
GO:0016149	translation release factor activity, codon specific	Molecular Function	1	1	0.363935	LOC_Os05g31020
GO:0010293	abscisic aldehyde oxidase activity	Molecular Function	1	1	0.363935	LOC_Os03g57720
GO:0051670	inulinase activity	Molecular Function	1	1	0.363935	LOC_Os04g33740
GO:0004392	heme oxygenase (decyclizing) activity	Molecular Function	1	1	0.363935	LOC_Os04g43200
GO:0047760	butyrate-CoA ligase activity	Molecular Function	1	1	0.363935	LOC_Os03g04130
GO:0080118	brassinosteroid sulfotransferase activity	Molecular Function	2	1	0.369326	LOC_Os12g17160;LOC_Os07g05460
GO:0008106	alcohol dehydrogenase (NADP+) activity	Molecular Function	2	1	0.369326	LOC_Os04g37480;LOC_Os04g45000
GO:0050062	long-chain-fatty-acyl-CoA reductase activity	Molecular Function	2	1	0.369326	LOC_Os09g39410;LOC_Os08g44360
GO:0004721	phosphoprotein phosphatase activity	Molecular Function	6	1	0.375714	LOC_Os11g01790;LOC_Os05g11990;LOC_Os01g42960;LOC_Os12g01770;LOC_Os03g09220;LOC_Os03g47620
GO:0018024	histone-lysine N-methyltransferase activity	Molecular Function	5	1	0.376134	LOC_Os01g68730;LOC_Os01g52160;LOC_Os08g30850;LOC_Os01g41200;LOC_Os04g17100
GO:0004089	carbonate dehydratase activity	Molecular Function	2	1	0.385319	LOC_Os08g36680;LOC_Os01g45274
GO:0005388	calcium-transporting ATPase activity	Molecular Function	2	1	0.385319	LOC_Os04g51610;LOC_Os08g36680
GO:0034277	ent-cassa-12,15-diene synthase activity	Molecular Function	1	1	0.392077	LOC_Os02g36264
GO:0080081	4-methylumbelliferyl-beta-D-glucopyranoside beta-glucosidase activity	Molecular Function	1	1	0.392077	LOC_Os03g49610
GO:0004340	glucokinase activity	Molecular Function	1	1	0.392077	LOC_Os01g71320
GO:0034076	cucurbitadienol synthase activity	Molecular Function	1	1	0.392077	LOC_Os11g18366
GO:0080082	esculin beta-glucosidase activity	Molecular Function	1	1	0.392077	LOC_Os03g49610
GO:0003885	D-arabinono-1,4-lactone oxidase activity	Molecular Function	1	1	0.392077	LOC_Os08g02230
GO:0016207	4-coumarate-CoA ligase activity	Molecular Function	1	1	0.392077	LOC_Os10g42800
GO:0016174	NAD(P)H oxidase activity	Molecular Function	1	1	0.392077	LOC_Os12g35610
GO:0008509	anion transmembrane transporter activity	Molecular Function	1	1	0.392077	LOC_Os06g13210
GO:0030744	luteolin O-methyltransferase activity	Molecular Function	1	1	0.392077	LOC_Os04g01470
GO:0080132	fatty acid alpha-hydroxylase activity	Molecular Function	1	1	0.392077	LOC_Os03g56820
GO:0004656	procollagen-proline 4-dioxygenase activity	Molecular Function	1	1	0.392077	LOC_Os03g55380
GO:0046424	ferulate 5-hydroxylase activity	Molecular Function	1	1	0.392077	LOC_Os03g56820
GO:0016820	hydrolase activity, acting on acid anhydrides, catalyzing transmembrane movement of substances	Molecular Function	1	1	0.392077	LOC_Os02g47320
GO:0004366	glycerol-3-phosphate O-acyltransferase activity	Molecular Function	1	1	0.392077	LOC_Os04g43200
GO:0046577	long-chain-alcohol oxidase activity	Molecular Function	1	1	0.392077	LOC_Os10g33520
GO:0043168	anion binding	Molecular Function	3	1	0.405802	LOC_Os03g59360;LOC_Os12g35350;LOC_Os06g23684
GO:0016671	oxidoreductase activity, acting on a sulfur group of donors, disulfide as acceptor	Molecular Function	2	1	0.416751	LOC_Os03g21000;LOC_Os07g48510
GO:0009916	alternative oxidase activity	Molecular Function	1	1	0.418975	LOC_Os04g51160
GO:0008843	endochitinase activity	Molecular Function	1	1	0.418975	LOC_Os05g33130
GO:0047769	arogenate dehydratase activity	Molecular Function	1	1	0.418975	LOC_Os07g49390
GO:0052625	4-aminobenzoate amino acid synthetase activity	Molecular Function	1	1	0.418975	LOC_Os07g40290
GO:0015103	inorganic anion transmembrane transporter activity	Molecular Function	1	1	0.418975	LOC_Os07g15370
GO:0047504	(-)-menthol dehydrogenase activity	Molecular Function	1	1	0.418975	LOC_Os04g45000
GO:0016629	12-oxophytodienoate reductase activity	Molecular Function	1	1	0.418975	LOC_Os01g27230
GO:0047364	desulfoglucosinolate sulfotransferase activity	Molecular Function	1	1	0.418975	LOC_Os07g05460
GO:0003959	NADPH dehydrogenase activity	Molecular Function	1	1	0.418975	LOC_Os05g26660
GO:0052627	vanillate amino acid synthetase activity	Molecular Function	1	1	0.418975	LOC_Os07g40290
GO:0047501	(+)-neomenthol dehydrogenase activity	Molecular Function	1	1	0.418975	LOC_Os04g45000
GO:0016231	beta-N-acetylglucosaminidase activity	Molecular Function	1	1	0.418975	LOC_Os05g33130
GO:0003987	acetate-CoA ligase activity	Molecular Function	1	1	0.418975	LOC_Os03g04130
GO:0052626	benzoate amino acid synthetase activity	Molecular Function	1	1	0.418975	LOC_Os07g40290
GO:0016627	oxidoreductase activity, acting on the CH-CH group of donors	Molecular Function	1	1	0.418975	LOC_Os02g04170
GO:0097367	carbohydrate derivative binding	Molecular Function	1	1	0.418975	LOC_Os09g37600
GO:0052628	4-hydroxybenzoate amino acid synthetase activity	Molecular Function	1	1	0.418975	LOC_Os07g40290
GO:0009931	calcium-dependent protein serine/threonine kinase activity	Molecular Function	1	1	0.418975	LOC_Os02g34600
GO:0035252	UDP-xylosyltransferase activity	Molecular Function	1	1	0.418975	LOC_Os11g27370
GO:0050662	coenzyme binding	Molecular Function	7	1	0.425297	LOC_Os09g32670;LOC_Os06g44260;LOC_Os06g46920;LOC_Os05g51670;LOC_Os09g31522;LOC_Os09g08720;LOC_Os04g53860
GO:0032440	2-alkenal reductase [NAD(P)] activity	Molecular Function	2	1	0.43216	LOC_Os04g41960;LOC_Os12g12470
GO:0004675	transmembrane receptor protein serine/threonine kinase activity	Molecular Function	3	1	0.441431	LOC_Os07g04040;LOC_Os07g18230;LOC_Os04g52780
GO:0005222	intracellular cAMP activated cation channel activity	Molecular Function	1	1	0.444683	LOC_Os01g57370
GO:0010291	carotene beta-ring hydroxylase activity	Molecular Function	1	1	0.444683	LOC_Os03g03370
GO:0004175	endopeptidase activity	Molecular Function	1	1	0.444683	LOC_Os01g52230
GO:0050017	L-3-cyanoalanine synthase activity	Molecular Function	1	1	0.444683	LOC_Os04g08350
GO:0005496	steroid binding	Molecular Function	1	1	0.444683	LOC_Os02g06140
GO:0005544	calcium-dependent phospholipid binding	Molecular Function	1	1	0.444683	LOC_Os02g51750
GO:0052639	salicylic acid glucosyltransferase (ester-forming) activity	Molecular Function	1	1	0.444683	LOC_Os09g34214
GO:0003747	translation release factor activity	Molecular Function	1	1	0.444683	LOC_Os05g31020
GO:0005366	myo-inositol	Molecular Function	1	1	0.444683	LOC_Os02g58530
GO:0004357	glutamate-cysteine ligase activity	Molecular Function	1	1	0.444683	LOC_Os09g23560
GO:0010294	abscisic acid glucosyltransferase activity	Molecular Function	2	1	0.447348	LOC_Os01g45140;LOC_Os05g42070
GO:0015035	protein disulfide oxidoreductase activity	Molecular Function	5	1	0.455176	LOC_Os01g09830;LOC_Os03g21000;LOC_Os04g53730;LOC_Os01g47760;LOC_Os07g48510
GO:0004693	cyclin-dependent protein serine/threonine kinase activity	Molecular Function	2	1	0.462305	LOC_Os08g40170;LOC_Os10g41430
GO:0004560	alpha-L-fucosidase activity	Molecular Function	1	1	0.469255	LOC_Os06g03890
GO:0016307	phosphatidylinositol phosphate kinase activity	Molecular Function	1	1	0.469255	LOC_Os04g59540
GO:0016759	cellulose synthase activity	Molecular Function	1	1	0.469255	LOC_Os02g51060
GO:0010284	lariciresinol reductase activity	Molecular Function	1	1	0.469255	LOC_Os01g13610
GO:0031624	ubiquitin conjugating enzyme binding	Molecular Function	1	1	0.469255	LOC_Os04g48260
GO:0080133	midchain alkane hydroxylase activity	Molecular Function	1	1	0.469255	LOC_Os03g04530
GO:0090448	glucosinolate	Molecular Function	1	1	0.469255	LOC_Os05g34010
GO:0004096	catalase activity	Molecular Function	1	1	0.469255	LOC_Os12g06060
GO:0005457	GDP-fucose transmembrane transporter activity	Molecular Function	1	1	0.469255	LOC_Os02g41780
GO:0034768	(E)-beta-ocimene synthase activity	Molecular Function	1	1	0.469255	LOC_Os02g54820
GO:0004161	dimethylallyltranstransferase activity	Molecular Function	1	1	0.469255	LOC_Os04g56230
GO:0010283	pinoresinol reductase activity	Molecular Function	1	1	0.469255	LOC_Os01g13610
GO:0050506	vomilenine glucosyltransferase activity	Molecular Function	1	1	0.49274	LOC_Os08g39860
GO:0052640	salicylic acid glucosyltransferase (glucoside-forming) activity	Molecular Function	1	1	0.49274	LOC_Os09g34214
GO:0016229	steroid dehydrogenase activity	Molecular Function	1	1	0.49274	LOC_Os04g37480
GO:0052581	(-)-isopiperitenone reductase activity	Molecular Function	1	1	0.49274	LOC_Os04g45000
GO:0050247	raucaffricine beta-glucosidase activity	Molecular Function	1	1	0.49274	LOC_Os08g39860
GO:0004028	3-chloroallyl aldehyde dehydrogenase activity	Molecular Function	1	1	0.49274	LOC_Os06g39230
GO:0050551	myrcene synthase activity	Molecular Function	1	1	0.49274	LOC_Os02g54820
GO:0047434	indolepyruvate decarboxylase activity	Molecular Function	1	1	0.49274	LOC_Os01g12490
GO:0005313	L-glutamate transmembrane transporter activity	Molecular Function	1	1	0.49274	LOC_Os12g06060
GO:0070401	NADP+ binding	Molecular Function	1	1	0.49274	LOC_Os04g37480
GO:0004664	prephenate dehydratase activity	Molecular Function	1	1	0.49274	LOC_Os07g49390
GO:0015144	carbohydrate transmembrane transporter activity	Molecular Function	1	1	0.49274	LOC_Os02g58530
GO:0052641	benzoic acid glucosyltransferase activity	Molecular Function	1	1	0.49274	LOC_Os09g34214
GO:0080116	glucuronoxylan glucuronosyltransferase activity	Molecular Function	1	1	0.49274	LOC_Os07g48830
GO:0008236	serine-type peptidase activity	Molecular Function	3	1	0.498811	LOC_Os02g16940;LOC_Os01g58280;LOC_Os02g53840
GO:0038023	signaling receptor activity	Molecular Function	4	1	0.503167	LOC_Os01g48570;LOC_Os07g05740;LOC_Os05g07820;LOC_Os07g31500
GO:0015079	potassium ion transmembrane transporter activity	Molecular Function	2	1	0.505698	LOC_Os04g52390;LOC_Os09g27580
GO:0004616	phosphogluconate dehydrogenase (decarboxylating) activity	Molecular Function	1	1	0.515186	LOC_Os06g13720
GO:0051020	GTPase binding	Molecular Function	1	1	0.515186	LOC_Os03g62314
GO:0052638	indole-3-butyrate beta-glucosyltransferase activity	Molecular Function	1	1	0.515186	LOC_Os09g34214
GO:0047036	codeinone reductase (NADPH) activity	Molecular Function	1	1	0.515186	LOC_Os04g37480
GO:0015245	fatty acid transporter activity	Molecular Function	1	1	0.515186	LOC_Os09g29670
GO:0016614	oxidoreductase activity, acting on CH-OH group of donors	Molecular Function	1	1	0.515186	LOC_Os03g57720
GO:0008195	phosphatidate phosphatase activity	Molecular Function	1	1	0.515186	LOC_Os01g47580
GO:0010327	acetyl CoA	Molecular Function	1	1	0.53664	LOC_Os06g49660
GO:0080002	UDP-glucose	Molecular Function	1	1	0.53664	LOC_Os09g34214
GO:0008143	poly(A) binding	Molecular Function	1	1	0.53664	LOC_Os02g40900
GO:0005384	manganese ion transmembrane transporter activity	Molecular Function	1	1	0.53664	LOC_Os07g15370
GO:0005459	UDP-galactose transmembrane transporter activity	Molecular Function	1	1	0.53664	LOC_Os02g41780
GO:0047209	coniferyl-alcohol glucosyltransferase activity	Molecular Function	1	1	0.53664	LOC_Os01g53330
GO:0051980	iron-nicotianamine transmembrane transporter activity	Molecular Function	1	1	0.557145	LOC_Os02g02460
GO:0080150	S-adenosyl-L-methionine	Molecular Function	1	1	0.557145	LOC_Os06g13560
GO:0015215	nucleotide transmembrane transporter activity	Molecular Function	1	1	0.557145	LOC_Os01g12520
GO:0030983	mismatched DNA binding	Molecular Function	1	1	0.557145	LOC_Os08g44360
GO:0090440	abscisic acid transporter activity	Molecular Function	1	1	0.557145	LOC_Os10g40600
GO:0008146	sulfotransferase activity	Molecular Function	2	1	0.559886	LOC_Os07g05460;LOC_Os12g17160
GO:0003779	actin binding	Molecular Function	4	1	0.56738	LOC_Os01g33080;LOC_Os03g60580;LOC_Os07g49140;LOC_Os03g38170
GO:0052624	2-phytyl-1,4-naphthoquinone methyltransferase activity	Molecular Function	1	1	0.576743	LOC_Os06g13560
GO:0008353	RNA polymerase II carboxy-terminal domain kinase activity	Molecular Function	1	1	0.576743	LOC_Os08g40170
GO:0003872	6-phosphofructokinase activity	Molecular Function	1	1	0.576743	LOC_Os06g22060
GO:0003756	protein disulfide isomerase activity	Molecular Function	1	1	0.576743	LOC_Os04g53730
GO:0005460	UDP-glucose transmembrane transporter activity	Molecular Function	1	1	0.595474	LOC_Os02g41780
GO:0090447	glycerol-3-phosphate 2-O-acyltransferase activity	Molecular Function	1	1	0.595474	LOC_Os01g63580
GO:0042277	peptide binding	Molecular Function	1	1	0.595474	LOC_Os05g07820
GO:0052747	sinapyl alcohol dehydrogenase activity	Molecular Function	1	1	0.613377	LOC_Os09g23560
GO:0004427	inorganic diphosphatase activity	Molecular Function	1	1	0.613377	LOC_Os01g52230
GO:0042054	histone methyltransferase activity	Molecular Function	1	1	0.613377	LOC_Os08g30850
GO:0046873	metal ion transmembrane transporter activity	Molecular Function	1	1	0.613377	LOC_Os01g41720
GO:0030234	enzyme regulator activity	Molecular Function	1	1	0.630488	LOC_Os06g46950
GO:0005338	nucleotide-sugar transmembrane transporter activity	Molecular Function	1	1	0.630488	LOC_Os11g04380
GO:0015326	basic amino acid transmembrane transporter activity	Molecular Function	1	1	0.630488	LOC_Os12g06060
GO:0047134	protein-disulfide reductase activity	Molecular Function	1	1	0.630488	LOC_Os01g58194
GO:0008121	ubiquinol-cytochrome-c reductase activity	Molecular Function	1	1	0.630488	LOC_Os07g41320
GO:0051184	cofactor transporter activity	Molecular Function	1	1	0.630488	LOC_Os01g12520
GO:0008137	NADH dehydrogenase (ubiquinone) activity	Molecular Function	2	1	0.632933	LOC_Os04g48930;LOC_Os01g58022
GO:0008168	methyltransferase activity	Molecular Function	8	1	0.635648	LOC_Os06g20790;LOC_Os01g20206;LOC_Os11g38860;LOC_Os05g01140;LOC_Os04g48260;LOC_Os01g67360;LOC_Os06g13560;LOC_Os01g66110
GO:0051536	iron-sulfur cluster binding	Molecular Function	3	1	0.641264	LOC_Os03g05310;LOC_Os05g49300;LOC_Os11g07912
GO:0030551	cyclic nucleotide binding	Molecular Function	1	1	0.646843	LOC_Os01g57370
GO:0080069	7-methylthioheptyl-desulfoglucosinolate sulfotransferase activity	Molecular Function	1	1	0.646843	LOC_Os12g17160
GO:0080066	3-methylthiopropyl-desulfoglucosinolate sulfotransferase activity	Molecular Function	1	1	0.646843	LOC_Os12g17160
GO:0070300	phosphatidic acid binding	Molecular Function	1	1	0.646843	LOC_Os02g34600
GO:0080070	8-methylthiooctyl-desulfoglucosinolate sulfotransferase activity	Molecular Function	1	1	0.646843	LOC_Os12g17160
GO:0008107	galactoside 2-alpha-L-fucosyltransferase activity	Molecular Function	1	1	0.646843	LOC_Os08g24750
GO:0080071	indol-3-yl-methyl-desulfoglucosinolate sulfotransferase activity	Molecular Function	1	1	0.646843	LOC_Os12g17160
GO:0080068	5-methylthiopentyl-desulfoglucosinolate sulfotransferase activity	Molecular Function	1	1	0.646843	LOC_Os12g17160
GO:0080067	4-methylthiobutyl-desulfoglucosinolate sulfotransferase activity	Molecular Function	1	1	0.646843	LOC_Os12g17160
GO:0043295	glutathione binding	Molecular Function	2	1	0.655078	LOC_Os03g04250;LOC_Os10g38780
GO:0010181	FMN binding	Molecular Function	3	1	0.659113	LOC_Os05g48200;LOC_Os01g27230;LOC_Os11g05320
GO:0017111	nucleoside-triphosphatase activity	Molecular Function	9	1	0.667501	LOC_Os01g42070;LOC_Os01g55260;LOC_Os09g39910;LOC_Os02g32520;LOC_Os02g56540;LOC_Os04g30720;LOC_Os05g50750;LOC_Os07g09420;LOC_Os01g12660
GO:0003774	motor activity	Molecular Function	1	1	0.677413	LOC_Os03g38170
GO:0005262	calcium channel activity	Molecular Function	1	1	0.677413	LOC_Os01g57370
GO:0051087	chaperone binding	Molecular Function	1	1	0.677413	LOC_Os11g31060
GO:0004521	endoribonuclease activity	Molecular Function	1	1	0.677413	LOC_Os08g33710
GO:0005484	SNAP receptor activity	Molecular Function	1	1	0.691691	LOC_Os03g52650
GO:0043022	ribosome binding	Molecular Function	1	1	0.691691	LOC_Os01g17330
GO:0004180	carboxypeptidase activity	Molecular Function	1	1	0.691691	LOC_Os09g28840
GO:0008810	cellulase activity	Molecular Function	1	1	0.705338	LOC_Os02g50040
GO:0022891	substrate-specific transmembrane transporter activity	Molecular Function	3	1	0.708759	LOC_Os04g53930;LOC_Os09g39910;LOC_Os04g37990
GO:0004527	exonuclease activity	Molecular Function	3	1	0.716469	LOC_Os02g47920;LOC_Os01g56940;LOC_Os02g28074
GO:0003924	GTPase activity	Molecular Function	8	1	0.724909	LOC_Os11g37260;LOC_Os08g32920;LOC_Os05g34170;LOC_Os03g01530;LOC_Os05g43820;LOC_Os02g18450;LOC_Os05g44070;LOC_Os02g06340
GO:0015662	ATPase activity, coupled to transmembrane movement of ions, phosphorylative mechanism	Molecular Function	1	1	0.730848	LOC_Os03g08560
GO:0015078	hydrogen ion transmembrane transporter activity	Molecular Function	1	1	0.730848	LOC_Os02g24598
GO:0003678	DNA helicase activity	Molecular Function	5	1	0.73529	LOC_Os01g36390;LOC_Os05g39850;LOC_Os02g55410;LOC_Os08g41070;LOC_Os12g37400
GO:0070696	transmembrane receptor protein serine/threonine kinase binding	Molecular Function	1	1	0.742763	LOC_Os02g49950
GO:0019829	cation-transporting ATPase activity	Molecular Function	1	1	0.742763	LOC_Os03g08560
GO:0005528	FK506 binding	Molecular Function	1	1	0.742763	LOC_Os01g38359
GO:0008907	integrase activity	Molecular Function	1	1	0.754151	LOC_Os01g02740
GO:0005515	protein binding	Molecular Function	164	1	0.758914	LOC_Os07g02440;LOC_Os12g01770;LOC_Os08g01140;LOC_Os07g31500;LOC_Os12g06060;LOC_Os04g42950;LOC_Os03g56950;LOC_Os02g10760;LOC_Os03g19600;LOC_Os02g52930;LOC_Os10g39920;LOC_Os03g45194;LOC_Os03g21000;LOC_Os08g35160;LOC_Os02g30910;LOC_Os01g60600;LOC_Os09g15670;LOC_Os03g01320;LOC_Os05g49730;LOC_Os01g06640;LOC_Os08g39850;LOC_Os05g11990;LOC_Os06g40150;LOC_Os12g24800;LOC_Os07g48630;LOC_Os04g48760;LOC_Os01g…
GO:0016844	strictosidine synthase activity	Molecular Function	1	1	0.765034	LOC_Os07g42250
GO:0005242	inward rectifier potassium channel activity	Molecular Function	1	1	0.765034	LOC_Os01g57370
GO:0008047	enzyme activator activity	Molecular Function	1	1	0.775437	LOC_Os03g38170
GO:0000166	nucleotide binding	Molecular Function	42	1	0.779437	LOC_Os04g46560;LOC_Os02g05940;LOC_Os04g10010;LOC_Os04g53860;LOC_Os02g44820;LOC_Os02g05970;LOC_Os11g01620;LOC_Os08g45060;LOC_Os02g51890;LOC_Os08g37130;LOC_Os05g50750;LOC_Os03g61740;LOC_Os08g05290;LOC_Os01g55260;LOC_Os02g09740;LOC_Os06g11730;LOC_Os07g05740;LOC_Os03g62314;LOC_Os05g07820;LOC_Os02g30800;LOC_Os02g21340;LOC_Os05g30010;LOC_Os07g43950;LOC_Os04g59380;LOC_Os01g12660;LOC_Os03g57780;LOC_Os06g…
GO:0016711	flavonoid 3'-monooxygenase activity	Molecular Function	1	1	0.794881	LOC_Os03g14420
GO:0004867	serine-type endopeptidase inhibitor activity	Molecular Function	9	1	0.795234	LOC_Os01g03320;LOC_Os03g60840;LOC_Os01g42860;LOC_Os01g03340;LOC_Os01g03360;LOC_Os01g03680;LOC_Os01g03390;LOC_Os12g25090;LOC_Os01g59870
GO:0051539	4 iron, 4 sulfur cluster binding	Molecular Function	2	1	0.802363	LOC_Os01g25484;LOC_Os01g58022
GO:0009882	blue light photoreceptor activity	Molecular Function	1	1	0.812643	LOC_Os11g05320
GO:0000155	phosphorelay sensor kinase activity	Molecular Function	1	1	0.820938	LOC_Os07g45570
GO:0035091	phosphatidylinositol binding	Molecular Function	1	1	0.820938	LOC_Os01g20860
GO:0008506	sucrose	Molecular Function	1	1	0.820938	LOC_Os04g37990
GO:0005543	phospholipid binding	Molecular Function	2	1	0.821636	LOC_Os10g41060;LOC_Os08g32920
GO:0016616	oxidoreductase activity, acting on the CH-OH group of donors, NAD or NADP as acceptor	Molecular Function	3	1	0.829462	LOC_Os06g29180;LOC_Os08g34720;LOC_Os02g04755
GO:0046914	transition metal ion binding	Molecular Function	6	1	0.831765	LOC_Os06g21230;LOC_Os01g11590;LOC_Os08g10010;LOC_Os06g03720;LOC_Os12g12470;LOC_Os01g55240
GO:0015145	monosaccharide transmembrane transporter activity	Molecular Function	1	1	0.836445	LOC_Os04g37990
GO:0003684	damaged DNA binding	Molecular Function	1	1	0.836445	LOC_Os12g04980
GO:0004806	triglyceride lipase activity	Molecular Function	2	1	0.839204	LOC_Os11g43760;LOC_Os01g15000
GO:0003968	RNA-directed RNA polymerase activity	Molecular Function	1	1	0.857225	LOC_Os02g50330
GO:0008080	N-acetyltransferase activity	Molecular Function	1	1	0.857225	LOC_Os03g58020
GO:0015211	purine nucleoside transmembrane transporter activity	Molecular Function	1	1	0.857225	LOC_Os01g12520
GO:0008378	galactosyltransferase activity	Molecular Function	1	1	0.857225	LOC_Os06g07600
GO:0016757	transferase activity, transferring glycosyl groups	Molecular Function	7	1	0.867591	LOC_Os05g30750;LOC_Os08g34020;LOC_Os02g51060;LOC_Os05g35480;LOC_Os02g54820;LOC_Os08g24750;LOC_Os07g48370
GO:0005525	GTP binding	Molecular Function	10	1	0.880538	LOC_Os07g47450;LOC_Os11g37260;LOC_Os08g32920;LOC_Os05g44070;LOC_Os01g70730;LOC_Os02g18450;LOC_Os05g43820;LOC_Os02g06340;LOC_Os05g34170;LOC_Os03g01530
GO:0016853	isomerase activity	Molecular Function	2	1	0.894809	LOC_Os06g44260;LOC_Os01g58194
GO:0004683	calmodulin-dependent protein kinase activity	Molecular Function	1	1	0.896023	LOC_Os04g47300
GO:0030598	rRNA N-glycosylase activity	Molecular Function	2	1	0.905599	LOC_Os01g07300;LOC_Os01g06740
GO:0042393	histone binding	Molecular Function	1	1	0.9171	LOC_Os08g30850
GO:0008266	poly(U) RNA binding	Molecular Function	1	1	0.9171	LOC_Os04g16740
GO:0048038	quinone binding	Molecular Function	1	1	0.920773	LOC_Os01g58022
GO:0004842	ubiquitin-protein transferase activity	Molecular Function	19	1	0.922196	LOC_Os02g02830;LOC_Os02g33680;LOC_Os06g03580;LOC_Os04g34230;LOC_Os09g31200;LOC_Os09g21120;LOC_Os06g45580;LOC_Os02g49950;LOC_Os03g20870;LOC_Os09g30160;LOC_Os04g49130;LOC_Os01g16650;LOC_Os02g35329;LOC_Os08g38460;LOC_Os05g43610;LOC_Os07g48680;LOC_Os08g32060;LOC_Os04g48260;LOC_Os09g37050
GO:0004252	serine-type endopeptidase activity	Molecular Function	15	1	0.946466	LOC_Os02g16940;LOC_Os03g06290;LOC_Os10g25450;LOC_Os03g02750;LOC_Os03g55350;LOC_Os01g58280;LOC_Os02g10520;LOC_Os04g47170;LOC_Os04g03050;LOC_Os02g53840;LOC_Os06g46900;LOC_Os09g26920;LOC_Os04g48416;LOC_Os05g27060;LOC_Os08g39760
GO:0004222	metalloendopeptidase activity	Molecular Function	1	1	0.947309	LOC_Os06g12370
GO:0004383	guanylate cyclase activity	Molecular Function	1	1	0.959856	LOC_Os01g26300
GO:0008565	protein transporter activity	Molecular Function	1	1	0.959856	LOC_Os04g55200
GO:1901363	heterocyclic compound binding	Molecular Function	12	1	0.960206	LOC_Os01g20780;LOC_Os04g31710;LOC_Os09g39910;LOC_Os03g59360;LOC_Os01g42960;LOC_Os01g36220;LOC_Os07g07040;LOC_Os10g33520;LOC_Os06g36050;LOC_Os01g68740;LOC_Os01g68730;LOC_Os03g05210
GO:0005315	inorganic phosphate transmembrane transporter activity	Molecular Function	1	1	0.961635	LOC_Os04g10690
GO:0004568	chitinase activity	Molecular Function	16	1	0.964564	LOC_Os03g60560;LOC_Os06g04230;LOC_Os11g27400;LOC_Os03g63580;LOC_Os07g03120;LOC_Os04g32320;LOC_Os03g14140;LOC_Os05g11210;LOC_Os01g64110;LOC_Os03g54000;LOC_Os11g37950;LOC_Os03g21000;LOC_Os06g11600;LOC_Os04g41620;LOC_Os04g41640;LOC_Os10g41430
GO:0043566	structure-specific DNA binding	Molecular Function	1	1	0.96496	LOC_Os03g43670
GO:0003755	peptidyl-prolyl cis-trans isomerase activity	Molecular Function	1	1	0.978721	LOC_Os01g38359
GO:0097159	organic cyclic compound binding	Molecular Function	13	1	0.979433	LOC_Os01g36220;LOC_Os07g07040;LOC_Os10g33520;LOC_Os06g36050;LOC_Os01g68740;LOC_Os01g68730;LOC_Os03g05210;LOC_Os02g06150;LOC_Os01g20780;LOC_Os04g31710;LOC_Os09g39910;LOC_Os03g59360;LOC_Os01g42960
GO:0051082	unfolded protein binding	Molecular Function	2	1	0.983363	LOC_Os02g54140;LOC_Os03g61670
GO:0003746	translation elongation factor activity	Molecular Function	1	1	0.988201	LOC_Os02g18450
GO:0016772	transferase activity, transferring phosphorus-containing groups	Molecular Function	4	1	0.992594	LOC_Os04g39320;LOC_Os03g20450;LOC_Os08g05010;LOC_Os04g10890
GO:0008026	ATP-dependent helicase activity	Molecular Function	1	1	0.994787	LOC_Os06g48210
GO:0004519	endonuclease activity	Molecular Function	1	1	0.994787	LOC_Os01g56940
GO:0003824	catalytic activity	Molecular Function	73	1	0.998181	LOC_Os12g06980;LOC_Os10g33240;LOC_Os09g31522;LOC_Os01g03130;LOC_Os02g41840;LOC_Os06g18960;LOC_Os01g44250;LOC_Os06g36450;LOC_Os02g53000;LOC_Os01g57770;LOC_Os07g42250;LOC_Os05g27060;LOC_Os01g08470;LOC_Os09g29360;LOC_Os03g04220;LOC_Os01g56870;LOC_Os01g57450;LOC_Os04g53750;LOC_Os01g32330;LOC_Os11g10560;LOC_Os05g50470;LOC_Os11g05640;LOC_Os01g16920;LOC_Os07g12100;LOC_Os03g58020;LOC_Os08g03400;LOC_Os02g…
GO:0003743	translation initiation factor activity	Molecular Function	1	1	0.998399	LOC_Os01g17330
GO:0016740	transferase activity	Molecular Function	14	1	0.999671	LOC_Os01g49710;LOC_Os10g38710;LOC_Os04g37480;LOC_Os06g46920;LOC_Os01g49720;LOC_Os03g04220;LOC_Os04g08350;LOC_Os04g40590;LOC_Os02g46910;LOC_Os01g53820;LOC_Os05g12040;LOC_Os10g39740;LOC_Os07g19140;LOC_Os07g09050
GO:0008483	transaminase activity	Molecular Function	4	1	0.99988	LOC_Os05g15530;LOC_Os09g18090;LOC_Os11g42510;LOC_Os12g08850
GO:0016787	hydrolase activity	Molecular Function	66	1	0.999936	LOC_Os03g14654;LOC_Os01g71170;LOC_Os03g24070;LOC_Os04g56680;LOC_Os03g57080;LOC_Os08g37180;LOC_Os02g07110;LOC_Os12g40860;LOC_Os12g35350;LOC_Os12g02980;LOC_Os04g56230;LOC_Os03g54910;LOC_Os06g50230;LOC_Os11g10560;LOC_Os01g11010;LOC_Os11g06730;LOC_Os05g10330;LOC_Os06g44190;LOC_Os03g16670;LOC_Os04g54210;LOC_Os01g41240;LOC_Os01g21250;LOC_Os01g06740;LOC_Os09g28280;LOC_Os01g20780;LOC_Os07g37850;LOC_Os09g…
GO:0043531	ADP binding	Molecular Function	18	1	0.999953	LOC_Os08g10260;LOC_Os01g41890;LOC_Os01g71810;LOC_Os04g53750;LOC_Os03g38250;LOC_Os05g31610;LOC_Os11g12050;LOC_Os11g37860;LOC_Os11g28950;LOC_Os12g37280;LOC_Os01g24820;LOC_Os11g29000;LOC_Os07g01530;LOC_Os03g22620;LOC_Os04g02880;LOC_Os11g43420;LOC_Os08g07890;LOC_Os01g71820
GO:0005351	sugar	Molecular Function	5	1	0.999998	LOC_Os08g06010;LOC_Os02g58530;LOC_Os04g10690;LOC_Os03g43720;LOC_Os04g53930
GO:0005524	ATP binding	Molecular Function	123	1	1	LOC_Os09g29670;LOC_Os01g33040;LOC_Os05g46750;LOC_Os04g52780;LOC_Os05g03920;LOC_Os01g57540;LOC_Os08g34720;LOC_Os11g12530;LOC_Os06g21250;LOC_Os06g48210;LOC_Os02g06930;LOC_Os03g43440;LOC_Os01g02580;LOC_Os03g17760;LOC_Os07g48760;LOC_Os03g20450;LOC_Os12g36100;LOC_Os10g41550;LOC_Os08g02120;LOC_Os01g50370;LOC_Os12g39980;LOC_Os02g21090;LOC_Os11g01330;LOC_Os01g42900;LOC_Os03g08560;LOC_Os02g46680;LOC_Os10g…
GO:0003735	structural constituent of ribosome	Molecular Function	5	1	1	LOC_Os09g31031;LOC_Os09g27930;LOC_Os09g31019;LOC_Os01g34850;LOC_Os03g15370
GO:0005488	binding	Molecular Function	97	1	1	LOC_Os01g56870;LOC_Os01g57450;LOC_Os04g07150;LOC_Os11g28950;LOC_Os05g43140;LOC_Os01g65030;LOC_Os10g20770;LOC_Os03g25490;LOC_Os08g26840;LOC_Os08g08140;LOC_Os08g32920;LOC_Os03g63580;LOC_Os05g11210;LOC_Os06g43600;LOC_Os02g22020;LOC_Os08g10260;LOC_Os05g30010;LOC_Os01g11010;LOC_Os03g30150;LOC_Os10g36180;LOC_Os06g44190;LOC_Os03g38250;LOC_Os08g17160;LOC_Os04g58810;LOC_Os03g49830;LOC_Os03g10620;LOC_Os01g…
GO:0003677	DNA binding	Molecular Function	56	1	1	LOC_Os10g01570;LOC_Os03g21060;LOC_Os02g34970;LOC_Os07g43120;LOC_Os01g43230;LOC_Os05g02150;LOC_Os03g09170;LOC_Os09g23620;LOC_Os07g19140;LOC_Os01g31800;LOC_Os08g33660;LOC_Os08g41320;LOC_Os01g45090;LOC_Os04g30720;LOC_Os05g50340;LOC_Os11g32100;LOC_Os05g10690;LOC_Os03g13540;LOC_Os05g27060;LOC_Os12g37690;LOC_Os06g51260;LOC_Os09g29360;LOC_Os01g48446;LOC_Os02g36890;LOC_Os01g39330;LOC_Os01g46970;LOC_Os03g…
GO:0004190	aspartic-type endopeptidase activity	Molecular Function	14	1	1	LOC_Os06g02780;LOC_Os07g34850;LOC_Os09g25570;LOC_Os05g38260;LOC_Os05g48330;LOC_Os08g02990;LOC_Os01g44130;LOC_Os05g51220;LOC_Os01g02740;LOC_Os01g25688;LOC_Os01g04710;LOC_Os02g04755;LOC_Os06g02900;LOC_Os07g19140
GO:0003964	RNA-directed DNA polymerase activity	Molecular Function	9	1	1	LOC_Os03g35640;LOC_Os07g19140;LOC_Os02g54280;LOC_Os01g02740;LOC_Os05g36040;LOC_Os02g07380;LOC_Os05g20560;LOC_Os09g03190;LOC_Os05g38260
GO:0008270	zinc ion binding	Molecular Function	29	1	1	LOC_Os05g43610;LOC_Os08g31850;LOC_Os07g42924;LOC_Os01g45274;LOC_Os03g20870;LOC_Os06g13720;LOC_Os01g25688;LOC_Os01g09640;LOC_Os09g37050;LOC_Os02g51750;LOC_Os04g45000;LOC_Os10g32900;LOC_Os02g45040;LOC_Os03g15790;LOC_Os01g66890;LOC_Os07g14850;LOC_Os01g72460;LOC_Os02g53530;LOC_Os04g53750;LOC_Os04g52310;LOC_Os01g49280;LOC_Os06g48210;LOC_Os01g15650;LOC_Os01g44250;LOC_Os05g10670;LOC_Os12g15530;LOC_Os10g…
GO:0003723	RNA binding	Molecular Function	9	1	1	LOC_Os02g21090;LOC_Os08g33710;LOC_Os06g48210;LOC_Os03g58220;LOC_Os01g25688;LOC_Os08g02990;LOC_Os02g07370;LOC_Os09g28880;LOC_Os02g50330
GO:0016779	nucleotidyltransferase activity	Molecular Function	2	1	1	LOC_Os01g02740;LOC_Os05g38260
GO:0003676	nucleic acid binding	Molecular Function	24	1	1	LOC_Os06g46920;LOC_Os04g59380;LOC_Os05g43140;LOC_Os09g29360;LOC_Os02g53530;LOC_Os03g30150;LOC_Os12g06980;LOC_Os07g43120;LOC_Os01g21420;LOC_Os01g15650;LOC_Os04g58810;LOC_Os01g03130;LOC_Os07g29430;LOC_Os12g15530;LOC_Os04g10890;LOC_Os02g04755;LOC_Os03g06250;LOC_Os04g55850;LOC_Os03g37810;LOC_Os10g42910;LOC_Os03g15790;LOC_Os03g05250;LOC_Os09g09650;LOC_Os01g67110
GO:0004523	RNA-DNA hybrid ribonuclease activity	Molecular Function	3	1	1	LOC_Os03g36279;LOC_Os03g35640;LOC_Os07g29430
GO:0008234	cysteine-type peptidase activity	Molecular Function	2	1	1	LOC_Os12g03410;LOC_Os02g48450
GO:0072686	mitotic spindle	Cellular Component	5	1	0.00509803	LOC_Os01g70730;LOC_Os07g47450;LOC_Os01g49200;LOC_Os03g50970;LOC_Os05g33890
GO:0009524	phragmoplast	Cellular Component	23	1	0.00766215	LOC_Os12g36100;LOC_Os02g56540;LOC_Os01g49200;LOC_Os08g40170;LOC_Os01g50410;LOC_Os12g42160;LOC_Os05g33890;LOC_Os05g50750;LOC_Os07g02780;LOC_Os04g54940;LOC_Os04g28260;LOC_Os01g12660;LOC_Os05g43820;LOC_Os01g50400;LOC_Os10g35580;LOC_Os12g39980;LOC_Os01g55260;LOC_Os11g42800;LOC_Os03g52650;LOC_Os03g02290;LOC_Os03g38170;LOC_Os03g50970;LOC_Os01g33040
GO:0005876	spindle microtubule	Cellular Component	5	1	0.00768667	LOC_Os11g42800;LOC_Os10g35580;LOC_Os12g36100;LOC_Os04g54940;LOC_Os03g02290
GO:0031969	chloroplast membrane	Cellular Component	9	1	0.00783017	LOC_Os03g03370;LOC_Os03g18070;LOC_Os07g48510;LOC_Os07g49310;LOC_Os03g16920;LOC_Os12g01370;LOC_Os03g21000;LOC_Os05g38530;LOC_Os04g43200
GO:0005774	vacuolar membrane	Cellular Component	74	1	0.0103897	LOC_Os05g44070;LOC_Os03g55850;LOC_Os02g07870;LOC_Os01g16450;LOC_Os11g18730;LOC_Os11g19210;LOC_Os02g44770;LOC_Os01g42294;LOC_Os04g49560;LOC_Os06g46500;LOC_Os02g45940;LOC_Os03g16920;LOC_Os01g74450;LOC_Os07g15370;LOC_Os01g22352;LOC_Os11g37700;LOC_Os04g52390;LOC_Os02g12730;LOC_Os09g32964;LOC_Os12g12934;LOC_Os11g38860;LOC_Os03g06940;LOC_Os08g38270;LOC_Os04g48260;LOC_Os03g18630;LOC_Os09g25770;LOC_Os05g…
GO:0000325	plant-type vacuole	Cellular Component	12	1	0.0128669	LOC_Os02g07870;LOC_Os02g48450;LOC_Os11g37950;LOC_Os01g73980;LOC_Os03g52650;LOC_Os01g41990;LOC_Os12g12934;LOC_Os05g01810;LOC_Os02g01590;LOC_Os01g59840;LOC_Os06g13210;LOC_Os02g47320
GO:0042995	cell projection	Cellular Component	3	1	0.0153548	LOC_Os04g30720;LOC_Os02g56540;LOC_Os01g19480
GO:0044430	cytoskeletal part	Cellular Component	9	1	0.0196516	LOC_Os04g28260;LOC_Os03g39020;LOC_Os01g50420;LOC_Os12g43110;LOC_Os07g02780;LOC_Os01g42070;LOC_Os02g56540;LOC_Os01g50400;LOC_Os04g30720
GO:0005737	cytoplasm	Cellular Component	102	1	0.020318	LOC_Os12g04500;LOC_Os07g30620;LOC_Os02g58480;LOC_Os02g35760;LOC_Os03g15960;LOC_Os08g19420;LOC_Os02g54140;LOC_Os05g31020;LOC_Os06g11330;LOC_Os05g05670;LOC_Os02g35180;LOC_Os12g06660;LOC_Os01g74300;LOC_Os01g03710;LOC_Os06g51110;LOC_Os11g02300;LOC_Os02g34600;LOC_Os03g13570;LOC_Os03g63970;LOC_Os01g72330;LOC_Os08g04560;LOC_Os07g46990;LOC_Os07g33350;LOC_Os09g17560;LOC_Os01g04360;LOC_Os02g40010;LOC_Os07g…
GO:0044421	extracellular region part	Cellular Component	2	1	0.0276357	LOC_Os01g71820;LOC_Os01g71810
GO:0015630	microtubule cytoskeleton	Cellular Component	8	1	0.0295473	LOC_Os04g28260;LOC_Os03g39020;LOC_Os01g50420;LOC_Os07g02780;LOC_Os01g42070;LOC_Os02g56540;LOC_Os01g50400;LOC_Os04g30720
GO:0031897	Tic complex	Cellular Component	3	1	0.0394606	LOC_Os02g32520;LOC_Os10g35030;LOC_Os05g44340
GO:0048226	Casparian strip	Cellular Component	3	1	0.0394606	LOC_Os12g41690;LOC_Os06g12310;LOC_Os10g36924
GO:0044428	nuclear part	Cellular Component	44	1	0.0439131	LOC_Os03g04550;LOC_Os07g44410;LOC_Os10g33520;LOC_Os08g02230;LOC_Os01g16310;LOC_Os06g46995;LOC_Os11g18730;LOC_Os10g20770;LOC_Os10g28120;LOC_Os10g34110;LOC_Os07g10840;LOC_Os06g07600;LOC_Os03g63580;LOC_Os01g64100;LOC_Os03g52650;LOC_Os03g24730;LOC_Os08g04560;LOC_Os04g31710;LOC_Os01g40070;LOC_Os01g11010;LOC_Os08g38400;LOC_Os03g47010;LOC_Os06g03050;LOC_Os01g11860;LOC_Os03g60260;LOC_Os04g32110;LOC_Os09g…
GO:0031514	motile cilium	Cellular Component	3	1	0.0473393	LOC_Os04g28260;LOC_Os12g42160;LOC_Os03g02290
GO:0009986	cell surface	Cellular Component	9	1	0.0525866	LOC_Os03g43670;LOC_Os03g40100;LOC_Os02g51750;LOC_Os05g30820;LOC_Os03g13540;LOC_Os05g37470;LOC_Os11g05320;LOC_Os04g32110;LOC_Os01g63770
GO:0005887	integral component of plasma membrane	Cellular Component	12	1	0.0533027	LOC_Os02g30910;LOC_Os02g01210;LOC_Os12g08090;LOC_Os12g29220;LOC_Os08g42350;LOC_Os04g56470;LOC_Os01g42090;LOC_Os01g65880;LOC_Os01g47580;LOC_Os01g52230;LOC_Os12g09300;LOC_Os12g35610
GO:0030139	endocytic vesicle	Cellular Component	4	1	0.0537037	LOC_Os04g32110;LOC_Os03g43670;LOC_Os03g40100;LOC_Os05g30820
GO:0009573	chloroplast ribulose bisphosphate carboxylase complex	Cellular Component	2	1	0.0538848	LOC_Os12g19470;LOC_Os12g17600
GO:0005943	phosphatidylinositol 3-kinase complex, class IA	Cellular Component	1	1	0.055633	LOC_Os09g34140
GO:1990077	primosome complex	Cellular Component	1	1	0.055633	LOC_Os05g29010
GO:0005875	microtubule associated complex	Cellular Component	3	1	0.0559249	LOC_Os12g42160;LOC_Os12g39980;LOC_Os12g36100
GO:0097014	ciliary cytoplasm	Cellular Component	3	1	0.0559249	LOC_Os11g42800;LOC_Os12g39980;LOC_Os12g36100
GO:0043227	membrane-bounded organelle	Cellular Component	5	1	0.0635788	LOC_Os09g10340;LOC_Os07g10910;LOC_Os04g10160;LOC_Os01g72760;LOC_Os04g27020
GO:0009574	preprophase band	Cellular Component	7	1	0.068695	LOC_Os11g42800;LOC_Os08g40170;LOC_Os10g35580;LOC_Os01g49200;LOC_Os05g33890;LOC_Os03g50970;LOC_Os04g54940
GO:0016604	nuclear body	Cellular Component	7	1	0.0733396	LOC_Os09g28440;LOC_Os07g48630;LOC_Os03g45720;LOC_Os12g07030;LOC_Os07g42510;LOC_Os05g25260;LOC_Os08g36920
GO:0016328	lateral plasma membrane	Cellular Component	4	1	0.0749595	LOC_Os06g12310;LOC_Os12g37840;LOC_Os01g08020;LOC_Os10g36924
GO:0055028	cortical microtubule	Cellular Component	3	1	0.0751109	LOC_Os07g32390;LOC_Os05g33890;LOC_Os01g49200
GO:0043668	exine	Cellular Component	2	1	0.0858329	LOC_Os05g12630;LOC_Os10g33250
GO:0005819	spindle	Cellular Component	11	1	0.0887736	LOC_Os05g43820;LOC_Os01g55260;LOC_Os01g09580;LOC_Os01g49200;LOC_Os10g35580;LOC_Os08g40170;LOC_Os03g11400;LOC_Os05g50750;LOC_Os05g33890;LOC_Os01g12660;LOC_Os07g32390
GO:0022626	cytosolic ribosome	Cellular Component	23	1	0.0963188	LOC_Os03g16920;LOC_Os12g39220;LOC_Os05g09704;LOC_Os12g19470;LOC_Os03g49610;LOC_Os12g17600;LOC_Os06g39750;LOC_Os01g12660;LOC_Os11g01620;LOC_Os01g12260;LOC_Os06g14810;LOC_Os05g38530;LOC_Os01g55260;LOC_Os11g04380;LOC_Os05g09724;LOC_Os05g50750;LOC_Os03g11910;LOC_Os01g34560;LOC_Os02g58390;LOC_Os12g06060;LOC_Os05g10210;LOC_Os10g33370;LOC_Os05g09740
GO:0005771	multivesicular body	Cellular Component	3	1	0.096774	LOC_Os05g50750;LOC_Os01g12660;LOC_Os01g55260
GO:0031224	intrinsic component of membrane	Cellular Component	21	1	0.104844	LOC_Os03g03350;LOC_Os03g15320;LOC_Os04g41900;LOC_Os03g60260;LOC_Os05g42230;LOC_Os02g58740;LOC_Os11g29780;LOC_Os01g67110;LOC_Os05g50960;LOC_Os04g33920;LOC_Os12g32640;LOC_Os11g01620;LOC_Os04g59380;LOC_Os08g38460;LOC_Os07g38290;LOC_Os04g58860;LOC_Os05g31670;LOC_Os10g28120;LOC_Os09g38450;LOC_Os03g10620;LOC_Os07g49114
GO:0005881	cytoplasmic microtubule	Cellular Component	1	1	0.108173	LOC_Os02g18410
GO:0001673	male germ cell nucleus	Cellular Component	1	1	0.108173	LOC_Os12g40860
GO:0031357	integral component of chloroplast inner membrane	Cellular Component	1	1	0.108173	LOC_Os05g49170
GO:0070993	translation preinitiation complex	Cellular Component	1	1	0.108173	LOC_Os01g47490
GO:0000307	cyclin-dependent protein kinase holoenzyme complex	Cellular Component	1	1	0.108173	LOC_Os08g40170
GO:0010169	thioglucosidase complex	Cellular Component	1	1	0.108173	LOC_Os03g14654
GO:0005578	proteinaceous extracellular matrix	Cellular Component	1	1	0.108173	LOC_Os04g54810
GO:0045261	proton-transporting ATP synthase complex, catalytic core F(1)	Cellular Component	3	1	0.108447	LOC_Os02g40010;LOC_Os04g42520;LOC_Os04g16740
GO:0044459	plasma membrane part	Cellular Component	3	1	0.120633	LOC_Os03g06520;LOC_Os03g09940;LOC_Os02g58390
GO:0000775	chromosome, centromeric region	Cellular Component	3	1	0.120633	LOC_Os08g06600;LOC_Os10g31930;LOC_Os01g09580
GO:0010005	cortical microtubule, transverse to long axis	Cellular Component	6	1	0.122562	LOC_Os08g40170;LOC_Os10g35580;LOC_Os01g49200;LOC_Os05g33890;LOC_Os03g50970;LOC_Os04g54940
GO:0031982	vesicle	Cellular Component	3	1	0.133291	LOC_Os06g30370;LOC_Os11g06730;LOC_Os11g05470
GO:0015030	Cajal body	Cellular Component	5	1	0.135224	LOC_Os08g10080;LOC_Os11g03370;LOC_Os08g01330;LOC_Os06g04090;LOC_Os03g21030
GO:0005856	cytoskeleton	Cellular Component	6	1	0.137053	LOC_Os08g44420;LOC_Os01g50370;LOC_Os10g36650;LOC_Os05g50680;LOC_Os05g46760;LOC_Os12g06660
GO:0045298	tubulin complex	Cellular Component	2	1	0.141149	LOC_Os03g01530;LOC_Os05g34170
GO:0005662	DNA replication factor A complex	Cellular Component	1	1	0.157791	LOC_Os03g11540
GO:0000796	condensin complex	Cellular Component	1	1	0.157791	LOC_Os07g46540
GO:0019897	extrinsic component of plasma membrane	Cellular Component	1	1	0.157791	LOC_Os04g52950
GO:0008622	epsilon DNA polymerase complex	Cellular Component	1	1	0.157791	LOC_Os02g30800
GO:0008305	integrin complex	Cellular Component	1	1	0.157791	LOC_Os06g03580
GO:0035061	interchromatin granule	Cellular Component	3	1	0.159876	LOC_Os01g21420;LOC_Os03g43440;LOC_Os07g43950
GO:0005938	cell cortex	Cellular Component	3	1	0.159876	LOC_Os01g36580;LOC_Os03g05530;LOC_Os06g01966
GO:0000123	histone acetyltransferase complex	Cellular Component	2	1	0.160938	LOC_Os06g04870;LOC_Os06g04850
GO:0005783	endoplasmic reticulum	Cellular Component	62	1	0.161016	LOC_Os10g33520;LOC_Os04g43200;LOC_Os03g05520;LOC_Os03g04530;LOC_Os10g38110;LOC_Os11g35400;LOC_Os05g37250;LOC_Os06g46920;LOC_Os01g74450;LOC_Os06g39750;LOC_Os03g12140;LOC_Os09g35940;LOC_Os07g09420;LOC_Os02g53200;LOC_Os11g43980;LOC_Os01g05830;LOC_Os05g05930;LOC_Os07g46990;LOC_Os04g53860;LOC_Os08g44360;LOC_Os11g29720;LOC_Os12g10750;LOC_Os03g56820;LOC_Os01g65880;LOC_Os01g63540;LOC_Os07g36690;LOC_Os02g…
GO:0043190	ATP-binding cassette (ABC) transporter complex	Cellular Component	3	1	0.173724	LOC_Os05g04600;LOC_Os01g42900;LOC_Os04g54930
GO:0005815	microtubule organizing center	Cellular Component	2	1	0.181184	LOC_Os04g54940;LOC_Os10g35580
GO:0005929	cilium	Cellular Component	2	1	0.181184	LOC_Os05g38480;LOC_Os03g39020
GO:0005811	lipid particle	Cellular Component	2	1	0.181184	LOC_Os04g43200;LOC_Os06g27910
GO:0031225	anchored component of membrane	Cellular Component	15	1	0.188801	LOC_Os07g41320;LOC_Os10g33240;LOC_Os07g07860;LOC_Os03g20760;LOC_Os03g15340;LOC_Os01g59870;LOC_Os09g30160;LOC_Os02g16500;LOC_Os03g15790;LOC_Os01g57880;LOC_Os09g37600;LOC_Os03g48710;LOC_Os06g02900;LOC_Os05g15850;LOC_Os06g28670
GO:0005744	mitochondrial inner membrane presequence translocase complex	Cellular Component	3	1	0.202345	LOC_Os03g19290;LOC_Os01g19770;LOC_Os03g02390
GO:0018444	translation release factor complex	Cellular Component	1	1	0.20465	LOC_Os05g31020
GO:0030931	heterotetrameric ADPG pyrophosphorylase complex	Cellular Component	1	1	0.20465	LOC_Os04g02050
GO:0010317	pyrophosphate-dependent phosphofructokinase complex, alpha-subunit complex	Cellular Component	1	1	0.20465	LOC_Os06g22060
GO:0042406	extrinsic component of endoplasmic reticulum membrane	Cellular Component	1	1	0.20465	LOC_Os03g10310
GO:0032585	multivesicular body membrane	Cellular Component	1	1	0.20465	LOC_Os03g43670
GO:0090406	pollen tube	Cellular Component	8	1	0.237326	LOC_Os04g47170;LOC_Os02g58530;LOC_Os01g52770;LOC_Os01g62990;LOC_Os05g44600;LOC_Os05g38000;LOC_Os02g47420;LOC_Os05g44200
GO:0009531	secondary cell wall	Cellular Component	2	1	0.243601	LOC_Os05g43820;LOC_Os07g22580
GO:0016471	vacuolar proton-transporting V-type ATPase complex	Cellular Component	1	1	0.248904	LOC_Os02g47320
GO:0033597	mitotic checkpoint complex	Cellular Component	1	1	0.248904	LOC_Os01g74146
GO:0010369	chromocenter	Cellular Component	1	1	0.248904	LOC_Os02g10020
GO:0044424	intracellular part	Cellular Component	35	1	0.254578	LOC_Os01g02740;LOC_Os02g40260;LOC_Os10g28700;LOC_Os03g55350;LOC_Os01g09640;LOC_Os08g31860;LOC_Os06g02960;LOC_Os04g45340;LOC_Os08g41800;LOC_Os11g10560;LOC_Os07g05110;LOC_Os12g04150;LOC_Os02g44820;LOC_Os06g04230;LOC_Os12g17160;LOC_Os04g44354;LOC_Os11g26760;LOC_Os04g43710;LOC_Os03g22040;LOC_Os06g36810;LOC_Os06g07300;LOC_Os05g50910;LOC_Os03g05250;LOC_Os01g10490;LOC_Os07g05460;LOC_Os01g51840;LOC_Os11g…
GO:0045177	apical part of cell	Cellular Component	4	1	0.264625	LOC_Os02g58390;LOC_Os01g60330;LOC_Os05g40200;LOC_Os05g43820
GO:0033180	proton-transporting V-type ATPase, V1 domain	Cellular Component	1	1	0.290697	LOC_Os02g07870
GO:0009331	glycerol-3-phosphate dehydrogenase complex	Cellular Component	1	1	0.290697	LOC_Os01g71280
GO:0033178	proton-transporting two-sector ATPase complex, catalytic domain	Cellular Component	1	1	0.290697	LOC_Os01g12260
GO:0005872	minus-end kinesin complex	Cellular Component	1	1	0.290697	LOC_Os11g42800
GO:0016363	nuclear matrix	Cellular Component	3	1	0.293037	LOC_Os03g16920;LOC_Os05g38530;LOC_Os03g11910
GO:0005770	late endosome	Cellular Component	3	1	0.293037	LOC_Os03g12530;LOC_Os01g03914;LOC_Os12g41910
GO:0016021	integral component of membrane	Cellular Component	156	1	0.293359	LOC_Os11g12530;LOC_Os06g18960;LOC_Os01g63770;LOC_Os03g17790;LOC_Os02g42660;LOC_Os04g52780;LOC_Os06g27910;LOC_Os02g56920;LOC_Os10g33250;LOC_Os03g20450;LOC_Os03g43720;LOC_Os11g37260;LOC_Os04g47420;LOC_Os06g36450;LOC_Os04g41350;LOC_Os09g30120;LOC_Os09g25860;LOC_Os10g38800;LOC_Os02g46680;LOC_Os03g08560;LOC_Os02g02460;LOC_Os01g42900;LOC_Os04g10690;LOC_Os04g51610;LOC_Os04g43200;LOC_Os09g33830;LOC_Os12g…
GO:0000785	chromatin	Cellular Component	4	1	0.302455	LOC_Os04g17100;LOC_Os09g37910;LOC_Os01g52160;LOC_Os01g41200
GO:0009514	glyoxysome	Cellular Component	2	1	0.327587	LOC_Os04g40990;LOC_Os07g34520
GO:0010170	glucose-1-phosphate adenylyltransferase complex	Cellular Component	1	1	0.330166	LOC_Os03g52460
GO:0009516	leucoplast	Cellular Component	1	1	0.330166	LOC_Os06g39230
GO:0030133	transport vesicle	Cellular Component	1	1	0.330166	LOC_Os03g52650
GO:0031304	intrinsic component of mitochondrial inner membrane	Cellular Component	1	1	0.330166	LOC_Os05g26660
GO:0005782	peroxisomal matrix	Cellular Component	1	1	0.330166	LOC_Os02g47790
GO:0000776	kinetochore	Cellular Component	1	1	0.330166	LOC_Os02g10020
GO:0005753	mitochondrial proton-transporting ATP synthase complex	Cellular Component	1	1	0.330166	LOC_Os01g12260
GO:0009360	DNA polymerase III complex	Cellular Component	1	1	0.330166	LOC_Os12g10670
GO:0005758	mitochondrial intermembrane space	Cellular Component	2	1	0.348282	LOC_Os02g55134;LOC_Os05g26660
GO:0008287	protein serine/threonine phosphatase complex	Cellular Component	3	1	0.354996	LOC_Os01g40094;LOC_Os01g58640;LOC_Os05g46040
GO:0009930	longitudinal side of cell surface	Cellular Component	1	1	0.367439	LOC_Os07g41320
GO:0031314	extrinsic component of mitochondrial inner membrane	Cellular Component	1	1	0.367439	LOC_Os05g26660
GO:0031977	thylakoid lumen	Cellular Component	4	1	0.379318	LOC_Os12g19470;LOC_Os04g16740;LOC_Os12g17600;LOC_Os06g12370
GO:0031359	integral component of chloroplast outer membrane	Cellular Component	2	1	0.388973	LOC_Os01g19770;LOC_Os03g19290
GO:0005788	endoplasmic reticulum lumen	Cellular Component	7	1	0.395021	LOC_Os06g50230;LOC_Os03g61670;LOC_Os05g38530;LOC_Os04g31940;LOC_Os04g36750;LOC_Os08g35160;LOC_Os03g16920
GO:0009504	cell plate	Cellular Component	6	1	0.395295	LOC_Os03g52650;LOC_Os03g38170;LOC_Os03g02290;LOC_Os01g09580;LOC_Os05g44070;LOC_Os11g42800
GO:0030427	site of polarized growth	Cellular Component	1	1	0.40264	LOC_Os05g43820
GO:0030663	COPI-coated vesicle membrane	Cellular Component	1	1	0.40264	LOC_Os04g55200
GO:0031372	UBC13-MMS2 complex	Cellular Component	2	1	0.428493	LOC_Os02g02830;LOC_Os01g16650
GO:0043234	protein complex	Cellular Component	12	1	0.429423	LOC_Os01g50400;LOC_Os01g42070;LOC_Os07g07040;LOC_Os11g10560;LOC_Os01g50420;LOC_Os02g56540;LOC_Os03g26870;LOC_Os04g30720;LOC_Os02g06140;LOC_Os03g05210;LOC_Os07g02780;LOC_Os12g43110
GO:0032541	cortical endoplasmic reticulum	Cellular Component	1	1	0.435883	LOC_Os09g28880
GO:0005720	nuclear heterochromatin	Cellular Component	1	1	0.435883	LOC_Os08g30850
GO:0012511	monolayer-surrounded lipid storage body	Cellular Component	1	1	0.435883	LOC_Os06g27910
GO:0010287	plastoglobule	Cellular Component	7	1	0.440976	LOC_Os03g44380;LOC_Os12g42280;LOC_Os12g24800;LOC_Os07g05940;LOC_Os01g25990;LOC_Os04g16740;LOC_Os09g33530
GO:0030176	integral component of endoplasmic reticulum membrane	Cellular Component	2	1	0.447741	LOC_Os08g36680;LOC_Os03g47620
GO:0005681	spliceosomal complex	Cellular Component	2	1	0.466617	LOC_Os01g21420;LOC_Os03g49430
GO:0032578	aleurone grain membrane	Cellular Component	2	1	0.466617	LOC_Os09g37600;LOC_Os04g37770
GO:0042807	central vacuole	Cellular Component	1	1	0.467277	LOC_Os01g74450
GO:0019031	viral envelope	Cellular Component	1	1	0.467277	LOC_Os10g35030
GO:0044425	membrane part	Cellular Component	6	1	0.494515	LOC_Os05g11130;LOC_Os01g70970;LOC_Os04g27020;LOC_Os05g12040;LOC_Os03g52650;LOC_Os04g59540
GO:0005635	nuclear envelope	Cellular Component	7	1	0.49528	LOC_Os01g55260;LOC_Os01g42960;LOC_Os01g12660;LOC_Os03g47620;LOC_Os02g13660;LOC_Os05g50750;LOC_Os05g11990
GO:0031410	cytoplasmic vesicle	Cellular Component	2	1	0.503186	LOC_Os07g29960;LOC_Os03g45619
GO:0005732	small nucleolar ribonucleoprotein complex	Cellular Component	2	1	0.503186	LOC_Os08g01330;LOC_Os06g04090
GO:0008540	proteasome regulatory particle, base subcomplex	Cellular Component	3	1	0.503957	LOC_Os01g55260;LOC_Os01g12660;LOC_Os05g50750
GO:0009941	chloroplast envelope	Cellular Component	55	1	0.505888	LOC_Os09g16449;LOC_Os12g01370;LOC_Os06g45710;LOC_Os12g06060;LOC_Os03g11910;LOC_Os07g49310;LOC_Os02g36590;LOC_Os07g02780;LOC_Os06g40170;LOC_Os08g31060;LOC_Os05g50750;LOC_Os01g06640;LOC_Os03g38170;LOC_Os03g18070;LOC_Os11g01530;LOC_Os07g40290;LOC_Os04g16740;LOC_Os02g47790;LOC_Os12g17600;LOC_Os12g01530;LOC_Os08g39850;LOC_Os04g19740;LOC_Os08g43120;LOC_Os08g39840;LOC_Os08g37940;LOC_Os03g52460;LOC_Os06g…
GO:0000323	lytic vacuole	Cellular Component	1	1	0.524924	LOC_Os01g37910
GO:0015629	actin cytoskeleton	Cellular Component	1	1	0.524924	LOC_Os03g60580
GO:0030125	clathrin vesicle coat	Cellular Component	1	1	0.524924	LOC_Os05g46550
GO:0009501	amyloplast	Cellular Component	3	1	0.545209	LOC_Os03g20870;LOC_Os03g52460;LOC_Os05g48200
GO:0071782	endoplasmic reticulum tubular network	Cellular Component	1	1	0.551366	LOC_Os01g12650
GO:0071458	integral component of cytoplasmic side of endoplasmic reticulum membrane	Cellular Component	1	1	0.551366	LOC_Os01g12650
GO:0030863	cortical cytoskeleton	Cellular Component	1	1	0.551366	LOC_Os02g45620
GO:0030659	cytoplasmic vesicle membrane	Cellular Component	1	1	0.551366	LOC_Os08g17160
GO:0005673	transcription factor TFIIE complex	Cellular Component	1	1	0.551366	LOC_Os04g54520
GO:0010007	magnesium chelatase complex	Cellular Component	1	1	0.551366	LOC_Os01g41200
GO:0030173	integral component of Golgi membrane	Cellular Component	2	1	0.554896	LOC_Os07g36690;LOC_Os12g36890
GO:0005768	endosome	Cellular Component	27	1	0.5706	LOC_Os07g36690;LOC_Os01g60340;LOC_Os03g18110;LOC_Os03g62090;LOC_Os12g36890;LOC_Os02g30610;LOC_Os12g40890;LOC_Os02g06140;LOC_Os08g34020;LOC_Os05g37470;LOC_Os06g11600;LOC_Os11g04380;LOC_Os11g38860;LOC_Os01g08020;LOC_Os03g38170;LOC_Os09g32670;LOC_Os07g14850;LOC_Os01g67360;LOC_Os01g66110;LOC_Os05g12630;LOC_Os12g02980;LOC_Os01g63770;LOC_Os03g55380;LOC_Os01g11810;LOC_Os02g41780;LOC_Os04g52780;LOC_Os12g…
GO:0009534	chloroplast thylakoid	Cellular Component	9	1	0.572535	LOC_Os05g37000;LOC_Os05g44200;LOC_Os01g52770;LOC_Os10g32580;LOC_Os09g34140;LOC_Os03g38170;LOC_Os03g05310;LOC_Os06g14630;LOC_Os12g17570
GO:0070013	intracellular organelle lumen	Cellular Component	1	1	0.576337	LOC_Os01g42960
GO:0005777	peroxisome	Cellular Component	26	1	0.593442	LOC_Os03g04130;LOC_Os04g47300;LOC_Os02g40900;LOC_Os01g72530;LOC_Os12g06060;LOC_Os03g06290;LOC_Os05g04170;LOC_Os06g39230;LOC_Os01g20780;LOC_Os04g53860;LOC_Os01g27230;LOC_Os06g48210;LOC_Os06g21250;LOC_Os05g26660;LOC_Os10g42800;LOC_Os03g17760;LOC_Os01g67540;LOC_Os11g35400;LOC_Os06g11730;LOC_Os09g31522;LOC_Os01g72460;LOC_Os01g25500;LOC_Os02g51890;LOC_Os07g17970;LOC_Os09g08720;LOC_Os06g21230
GO:0000306	extrinsic component of vacuolar membrane	Cellular Component	1	1	0.599918	LOC_Os03g20870
GO:0000326	protein storage vacuole	Cellular Component	1	1	0.599918	LOC_Os01g74450
GO:0030126	COPI vesicle coat	Cellular Component	1	1	0.622188	LOC_Os04g55200
GO:0030131	clathrin adaptor complex	Cellular Component	1	1	0.622188	LOC_Os05g46550
GO:0044435	plastid part	Cellular Component	1	1	0.643219	LOC_Os09g37050
GO:0005945	6-phosphofructokinase complex	Cellular Component	1	1	0.66308	LOC_Os06g22060
GO:0005730	nucleolus	Cellular Component	61	1	0.668172	LOC_Os10g35580;LOC_Os01g55260;LOC_Os05g36280;LOC_Os04g49420;LOC_Os04g52090;LOC_Os08g33100;LOC_Os01g20780;LOC_Os01g18860;LOC_Os10g32900;LOC_Os05g50750;LOC_Os08g38300;LOC_Os03g06670;LOC_Os06g11730;LOC_Os04g16740;LOC_Os04g53860;LOC_Os06g07030;LOC_Os03g01530;LOC_Os05g41780;LOC_Os12g06660;LOC_Os09g28440;LOC_Os02g51890;LOC_Os07g07040;LOC_Os01g09580;LOC_Os01g31800;LOC_Os01g64640;LOC_Os05g43820;LOC_Os01g…
GO:0009570	chloroplast stroma	Cellular Component	55	1	0.675476	LOC_Os12g42280;LOC_Os05g44340;LOC_Os06g13720;LOC_Os04g46560;LOC_Os09g12290;LOC_Os02g54060;LOC_Os07g05940;LOC_Os02g10120;LOC_Os12g06660;LOC_Os10g25030;LOC_Os01g45274;LOC_Os01g25484;LOC_Os06g45710;LOC_Os03g04250;LOC_Os11g01530;LOC_Os06g10420;LOC_Os08g05290;LOC_Os04g58710;LOC_Os03g38170;LOC_Os02g51750;LOC_Os12g01530;LOC_Os03g44380;LOC_Os01g27760;LOC_Os08g37940;LOC_Os08g39840;LOC_Os11g12620;LOC_Os05g…
GO:0043680	filiform apparatus	Cellular Component	1	1	0.681836	LOC_Os05g25350
GO:0005795	Golgi stack	Cellular Component	3	1	0.688291	LOC_Os08g35160;LOC_Os05g51670;LOC_Os05g05930
GO:0005789	endoplasmic reticulum membrane	Cellular Component	14	1	0.697312	LOC_Os04g51610;LOC_Os06g02019;LOC_Os09g28880;LOC_Os01g12490;LOC_Os03g28300;LOC_Os05g11990;LOC_Os11g37260;LOC_Os01g45460;LOC_Os03g18070;LOC_Os02g47470;LOC_Os07g49310;LOC_Os01g42960;LOC_Os12g01370;LOC_Os04g47300
GO:0016459	myosin complex	Cellular Component	1	1	0.699548	LOC_Os03g38170
GO:0010282	senescence-associated vacuole	Cellular Component	1	1	0.716275	LOC_Os02g48450
GO:0005834	heterotrimeric G-protein complex	Cellular Component	2	1	0.722424	LOC_Os01g74146;LOC_Os04g40560
GO:0031307	integral component of mitochondrial outer membrane	Cellular Component	1	1	0.732072	LOC_Os01g71320
GO:0031901	early endosome membrane	Cellular Component	1	1	0.732072	LOC_Os05g44070
GO:0005801	cis-Golgi network	Cellular Component	2	1	0.733651	LOC_Os05g38530;LOC_Os03g16920
GO:0000139	Golgi membrane	Cellular Component	6	1	0.755715	LOC_Os02g51060;LOC_Os01g12490;LOC_Os09g30120;LOC_Os12g36890;LOC_Os01g45460;LOC_Os07g36690
GO:0005741	mitochondrial outer membrane	Cellular Component	1	1	0.761076	LOC_Os01g71320
GO:0043232	intracellular non-membrane-bounded organelle	Cellular Component	11	1	0.77241	LOC_Os05g46750;LOC_Os12g40260;LOC_Os09g11440;LOC_Os08g03180;LOC_Os04g07150;LOC_Os08g06600;LOC_Os02g35329;LOC_Os07g08710;LOC_Os03g05210;LOC_Os04g38810;LOC_Os04g40560
GO:0005654	nucleoplasm	Cellular Component	8	1	0.794535	LOC_Os05g50750;LOC_Os04g40410;LOC_Os01g12660;LOC_Os05g10210;LOC_Os03g16334;LOC_Os01g12490;LOC_Os12g17530;LOC_Os01g55260
GO:0009526	plastid envelope	Cellular Component	2	1	0.801841	LOC_Os02g15750;LOC_Os11g04380
GO:0016607	nuclear speck	Cellular Component	3	1	0.802072	LOC_Os03g43440;LOC_Os01g21420;LOC_Os07g43950
GO:0005778	peroxisomal membrane	Cellular Component	1	1	0.81001	LOC_Os02g47790
GO:0005884	actin filament	Cellular Component	1	1	0.830582	LOC_Os03g60580
GO:0070469	respiratory chain	Cellular Component	1	1	0.830582	LOC_Os04g51160
GO:0009706	chloroplast inner membrane	Cellular Component	4	1	0.831414	LOC_Os01g05840;LOC_Os08g36680;LOC_Os02g24598;LOC_Os03g05310
GO:0032588	trans-Golgi network membrane	Cellular Component	1	1	0.857341	LOC_Os05g44070
GO:0009898	cytoplasmic side of plasma membrane	Cellular Component	1	1	0.857341	LOC_Os11g05320
GO:0005802	trans-Golgi network	Cellular Component	22	1	0.86723	LOC_Os02g56510;LOC_Os08g34020;LOC_Os03g52650;LOC_Os11g38860;LOC_Os11g04380;LOC_Os06g11600;LOC_Os07g36690;LOC_Os12g36890;LOC_Os03g62090;LOC_Os06g29790;LOC_Os03g18110;LOC_Os02g30610;LOC_Os12g40890;LOC_Os05g12630;LOC_Os12g02980;LOC_Os02g41780;LOC_Os01g11810;LOC_Os03g55380;LOC_Os09g32670;LOC_Os01g67360;LOC_Os07g14850;LOC_Os01g66110
GO:0043229	intracellular organelle	Cellular Component	37	1	0.878002	LOC_Os02g14910;LOC_Os11g07680;LOC_Os11g06730;LOC_Os01g32770;LOC_Os03g47730;LOC_Os03g46920;LOC_Os12g10670;LOC_Os04g52110;LOC_Os05g44060;LOC_Os01g07300;LOC_Os01g03940;LOC_Os04g31520;LOC_Os11g01040;LOC_Os12g12880;LOC_Os05g49350;LOC_Os02g43540;LOC_Os01g58620;LOC_Os07g49140;LOC_Os01g70560;LOC_Os08g45060;LOC_Os01g15000;LOC_Os03g19200;LOC_Os01g67110;LOC_Os09g21120;LOC_Os03g01320;LOC_Os08g39590;LOC_Os03g…
GO:0009579	thylakoid	Cellular Component	7	1	0.881987	LOC_Os04g49420;LOC_Os01g38359;LOC_Os02g45940;LOC_Os03g04250;LOC_Os06g45710;LOC_Os06g29180;LOC_Os02g51750
GO:0005694	chromosome	Cellular Component	2	1	0.883317	LOC_Os12g04980;LOC_Os08g30850
GO:0010319	stromule	Cellular Component	4	1	0.884344	LOC_Os12g06060;LOC_Os06g45710;LOC_Os04g16740;LOC_Os03g38170
GO:0090404	pollen tube tip	Cellular Component	2	1	0.89342	LOC_Os05g30820;LOC_Os05g25350
GO:0009925	basal plasma membrane	Cellular Component	1	1	0.909809	LOC_Os11g05320
GO:0009654	photosystem II oxygen evolving complex	Cellular Component	1	1	0.914833	LOC_Os07g05365
GO:0000151	ubiquitin ligase complex	Cellular Component	4	1	0.924988	LOC_Os08g32060;LOC_Os09g21120;LOC_Os02g33680;LOC_Os02g49950
GO:0009535	chloroplast thylakoid membrane	Cellular Component	29	1	0.927561	LOC_Os02g10120;LOC_Os04g51610;LOC_Os12g19470;LOC_Os07g05365;LOC_Os07g05940;LOC_Os01g12660;LOC_Os04g53930;LOC_Os05g49170;LOC_Os06g43600;LOC_Os02g54060;LOC_Os02g15750;LOC_Os12g42280;LOC_Os05g44340;LOC_Os06g12370;LOC_Os02g32520;LOC_Os04g19740;LOC_Os08g39840;LOC_Os12g24800;LOC_Os12g17600;LOC_Os12g01530;LOC_Os03g44380;LOC_Os08g39850;LOC_Os04g16740;LOC_Os03g45194;LOC_Os11g01530;LOC_Os01g55260;LOC_Os05g…
GO:0009707	chloroplast outer membrane	Cellular Component	2	1	0.932784	LOC_Os08g03560;LOC_Os01g71320
GO:0016324	apical plasma membrane	Cellular Component	2	1	0.932784	LOC_Os05g30820;LOC_Os05g25350
GO:0005759	mitochondrial matrix	Cellular Component	3	1	0.933524	LOC_Os05g26660;LOC_Os03g44150;LOC_Os06g13720
GO:0005743	mitochondrial inner membrane	Cellular Component	4	1	0.940044	LOC_Os04g16740;LOC_Os01g12520;LOC_Os04g51160;LOC_Os10g39870
GO:0022625	cytosolic large ribosomal subunit	Cellular Component	5	1	0.952299	LOC_Os01g42294;LOC_Os01g04230;LOC_Os09g31019;LOC_Os05g40200;LOC_Os01g60330
GO:0012505	endomembrane system	Cellular Component	2	1	0.961922	LOC_Os03g52650;LOC_Os03g62314
GO:0000145	exocyst	Cellular Component	2	1	0.96859	LOC_Os07g10910;LOC_Os01g67810
GO:0031090	organelle membrane	Cellular Component	1	1	0.969661	LOC_Os12g42910
GO:0005747	mitochondrial respiratory chain complex I	Cellular Component	1	1	0.982906	LOC_Os04g48930
GO:0005622	intracellular	Cellular Component	5	1	0.98318	LOC_Os04g45690;LOC_Os12g10660;LOC_Os03g17800;LOC_Os08g31850;LOC_Os07g22580
GO:0044434	chloroplast part	Cellular Component	4	1	0.985654	LOC_Os04g17100;LOC_Os11g47870;LOC_Os03g40100;LOC_Os01g52160
GO:0071944	cell periphery	Cellular Component	114	1	0.986644	LOC_Os02g07930;LOC_Os01g48710;LOC_Os12g40010;LOC_Os06g02780;LOC_Os11g42450;LOC_Os03g27110;LOC_Os01g09220;LOC_Os02g32650;LOC_Os07g39850;LOC_Os07g33280;LOC_Os07g04950;LOC_Os07g34850;LOC_Os03g10478;LOC_Os09g38450;LOC_Os07g05190;LOC_Os12g01360;LOC_Os05g37700;LOC_Os07g40900;LOC_Os03g03350;LOC_Os10g33990;LOC_Os01g32770;LOC_Os01g48940;LOC_Os05g47960;LOC_Os01g26270;LOC_Os05g49350;LOC_Os05g31670;LOC_Os03g…
GO:0016592	mediator complex	Cellular Component	1	1	0.991415	LOC_Os05g38530
GO:0019005	SCF ubiquitin ligase complex	Cellular Component	1	1	0.991894	LOC_Os12g40860
GO:0005750	mitochondrial respiratory chain complex III	Cellular Component	1	1	0.993177	LOC_Os07g41320
GO:0005829	cytosol	Cellular Component	163	1	0.993526	LOC_Os01g36390;LOC_Os02g21340;LOC_Os03g22120;LOC_Os10g36650;LOC_Os02g54820;LOC_Os06g39230;LOC_Os03g62670;LOC_Os03g50970;LOC_Os03g02290;LOC_Os03g52650;LOC_Os10g38470;LOC_Os03g63580;LOC_Os04g42520;LOC_Os10g38710;LOC_Os05g33890;LOC_Os09g32964;LOC_Os01g10890;LOC_Os08g40170;LOC_Os01g49200;LOC_Os03g58170;LOC_Os11g35400;LOC_Os09g25090;LOC_Os11g37700;LOC_Os05g46550;LOC_Os03g37960;LOC_Os06g11660;LOC_Os12g…
GO:0044464	cell part	Cellular Component	79	1	0.995327	LOC_Os08g41520;LOC_Os04g49950;LOC_Os06g02040;LOC_Os08g02990;LOC_Os05g30750;LOC_Os03g17960;LOC_Os09g26590;LOC_Os03g14130;LOC_Os06g12320;LOC_Os01g10180;LOC_Os08g43730;LOC_Os03g07180;LOC_Os07g42280;LOC_Os04g43230;LOC_Os01g06740;LOC_Os05g03972;LOC_Os03g10260;LOC_Os07g18750;LOC_Os05g50960;LOC_Os07g45530;LOC_Os07g34720;LOC_Os01g41890;LOC_Os04g46110;LOC_Os02g51720;LOC_Os01g69100;LOC_Os01g18220;LOC_Os09g…
GO:0030529	ribonucleoprotein complex	Cellular Component	1	1	0.996946	LOC_Os03g45280
GO:0044444	cytoplasmic part	Cellular Component	123	1	0.997698	LOC_Os04g59540;LOC_Os12g37400;LOC_Os01g41240;LOC_Os07g37690;LOC_Os02g58720;LOC_Os07g31960;LOC_Os10g42910;LOC_Os07g12100;LOC_Os07g32010;LOC_Os08g39270;LOC_Os10g37110;LOC_Os03g15340;LOC_Os10g07210;LOC_Os06g45580;LOC_Os06g16300;LOC_Os06g36670;LOC_Os04g39150;LOC_Os06g36050;LOC_Os11g01040;LOC_Os01g16310;LOC_Os06g02900;LOC_Os01g64100;LOC_Os03g55830;LOC_Os01g72210;LOC_Os08g32060;LOC_Os02g06150;LOC_Os03g…
GO:0009507	chloroplast	Cellular Component	139	1	0.999251	LOC_Os03g04770;LOC_Os01g52780;LOC_Os11g03300;LOC_Os12g01530;LOC_Os07g05740;LOC_Os01g50410;LOC_Os01g45460;LOC_Os12g02200;LOC_Os02g36550;LOC_Os06g24730;LOC_Os03g06520;LOC_Os11g05290;LOC_Os11g30500;LOC_Os02g47470;LOC_Os05g38000;LOC_Os12g40890;LOC_Os04g48930;LOC_Os05g01810;LOC_Os11g01530;LOC_Os01g20780;LOC_Os06g10420;LOC_Os03g61670;LOC_Os04g49420;LOC_Os02g05970;LOC_Os01g44390;LOC_Os04g37480;LOC_Os02g…
GO:0043231	intracellular membrane-bounded organelle	Cellular Component	126	1	0.99992	LOC_Os01g20160;LOC_Os03g38470;LOC_Os05g11300;LOC_Os11g42450;LOC_Os06g02780;LOC_Os05g49040;LOC_Os10g05490;LOC_Os10g05130;LOC_Os04g28520;LOC_Os01g36660;LOC_Os10g39740;LOC_Os01g15970;LOC_Os10g07200;LOC_Os07g05190;LOC_Os09g38450;LOC_Os01g33950;LOC_Os01g72360;LOC_Os03g03570;LOC_Os07g34850;LOC_Os08g24790;LOC_Os09g25570;LOC_Os01g68900;LOC_Os11g10710;LOC_Os04g40590;LOC_Os02g58740;LOC_Os02g58390;LOC_Os05g…
GO:0005840	ribosome	Cellular Component	7	1	0.999996	LOC_Os09g31031;LOC_Os11g19864;LOC_Os09g31019;LOC_Os09g27930;LOC_Os01g34850;LOC_Os06g09310;LOC_Os03g15370
GO:0005886	plasma membrane	Cellular Component	152	1	1	LOC_Os03g05530;LOC_Os05g04700;LOC_Os07g41320;LOC_Os03g21730;LOC_Os08g36680;LOC_Os12g07030;LOC_Os03g28300;LOC_Os01g53640;LOC_Os04g36600;LOC_Os12g41910;LOC_Os01g05840;LOC_Os04g48760;LOC_Os06g17490;LOC_Os05g48340;LOC_Os08g36920;LOC_Os04g37990;LOC_Os04g02050;LOC_Os01g02370;LOC_Os08g35160;LOC_Os09g27580;LOC_Os01g53840;LOC_Os04g41620;LOC_Os10g39870;LOC_Os11g04380;LOC_Os12g03730;LOC_Os12g01770;LOC_Os06g…
GO:0016020	membrane	Cellular Component	119	1	1	LOC_Os03g45619;LOC_Os03g20730;LOC_Os01g43740;LOC_Os02g52930;LOC_Os08g39370;LOC_Os06g03720;LOC_Os01g26300;LOC_Os04g40630;LOC_Os12g43110;LOC_Os08g25690;LOC_Os07g31500;LOC_Os07g49310;LOC_Os06g14810;LOC_Os03g21820;LOC_Os01g10490;LOC_Os12g36810;LOC_Os09g26360;LOC_Os06g46740;LOC_Os12g16210;LOC_Os01g43750;LOC_Os06g19630;LOC_Os08g01530;LOC_Os08g43120;LOC_Os05g38290;LOC_Os11g33270;LOC_Os05g25260;LOC_Os10g…
GO:0005634	nucleus	Cellular Component	137	1	1	LOC_Os08g36920;LOC_Os06g44320;LOC_Os08g01100;LOC_Os05g30500;LOC_Os08g31200;LOC_Os10g31930;LOC_Os08g34170;LOC_Os03g60080;LOC_Os12g41910;LOC_Os02g42560;LOC_Os09g36740;LOC_Os07g48630;LOC_Os09g31019;LOC_Os03g28300;LOC_Os07g46540;LOC_Os06g08100;LOC_Os02g51910;LOC_Os06g46950;LOC_Os09g28580;LOC_Os03g26490;LOC_Os03g20090;LOC_Os12g07030;LOC_Os01g72530;LOC_Os02g10760;LOC_Os09g25690;LOC_Os03g06360;LOC_Os02g…
GO:0016023	cytoplasmic membrane-bounded vesicle	Cellular Component	139	1	1	LOC_Os02g12730;LOC_Os02g36110;LOC_Os10g20890;LOC_Os11g48060;LOC_Os10g06000;LOC_Os01g67110;LOC_Os01g37910;LOC_Os05g38390;LOC_Os11g31940;LOC_Os04g53950;LOC_Os07g38290;LOC_Os07g04040;LOC_Os09g18230;LOC_Os05g15850;LOC_Os02g52040;LOC_Os07g44370;LOC_Os07g48680;LOC_Os06g39780;LOC_Os10g02770;LOC_Os07g44070;LOC_Os03g54930;LOC_Os01g22980;LOC_Os05g04700;LOC_Os08g36680;LOC_Os03g21730;LOC_Os07g41320;LOC_Os07g…
GO:0009536	plastid	Cellular Component	52	1	1	LOC_Os01g04230;LOC_Os02g45040;LOC_Os12g36890;LOC_Os04g27670;LOC_Os12g12250;LOC_Os02g08220;LOC_Os03g38170;LOC_Os08g02990;LOC_Os05g50470;LOC_Os08g39270;LOC_Os01g62760;LOC_Os03g04770;LOC_Os07g12100;LOC_Os02g07370;LOC_Os02g34640;LOC_Os03g12700;LOC_Os06g13720;LOC_Os05g41780;LOC_Os09g37050;LOC_Os09g18159;LOC_Os08g42350;LOC_Os02g41780;LOC_Os12g06190;LOC_Os02g56920;LOC_Os01g03130;LOC_Os03g49050;LOC_Os09g…
GO:0005739	mitochondrion	Cellular Component	62	1	1	LOC_Os01g52780;LOC_Os02g07380;LOC_Os11g41600;LOC_Os05g20560;LOC_Os01g25484;LOC_Os07g02780;LOC_Os11g25780;LOC_Os09g25100;LOC_Os01g18230;LOC_Os03g06250;LOC_Os04g37480;LOC_Os04g03050;LOC_Os11g01620;LOC_Os01g74300;LOC_Os05g36040;LOC_Os01g52160;LOC_Os01g47690;LOC_Os07g34720;LOC_Os07g48760;LOC_Os02g04170;LOC_Os03g24760;LOC_Os04g24430;LOC_Os02g06930;LOC_Os03g60580;LOC_Os03g24070;LOC_Os05g46750;LOC_Os09g…
GO:0071446	cellular response to salicylic acid stimulus	Biological Process	4	1	0.000684646	LOC_Os02g30910;LOC_Os12g29220;LOC_Os08g42350;LOC_Os12g26290
GO:0006268	DNA unwinding involved in DNA replication	Biological Process	4	1	0.000684646	LOC_Os01g36390;LOC_Os05g39850;LOC_Os02g55410;LOC_Os12g37400
GO:0009863	salicylic acid mediated signaling pathway	Biological Process	33	1	0.000713879	LOC_Os10g20890;LOC_Os11g13670;LOC_Os03g24930;LOC_Os03g02920;LOC_Os11g45540;LOC_Os08g31200;LOC_Os03g01300;LOC_Os03g43720;LOC_Os11g02840;LOC_Os11g03300;LOC_Os11g39450;LOC_Os07g14850;LOC_Os08g43600;LOC_Os11g03370;LOC_Os02g08440;LOC_Os02g51900;LOC_Os02g51910;LOC_Os04g55159;LOC_Os04g25440;LOC_Os03g50960;LOC_Os01g47760;LOC_Os01g52260;LOC_Os12g40920;LOC_Os10g25550;LOC_Os09g21710;LOC_Os04g30040;LOC_Os11g…
GO:0009933	meristem structural organization	Biological Process	28	1	0.000718693	LOC_Os06g49100;LOC_Os03g43670;LOC_Os03g09170;LOC_Os02g05940;LOC_Os04g53860;LOC_Os11g42450;LOC_Os03g11600;LOC_Os01g55260;LOC_Os03g18630;LOC_Os07g31500;LOC_Os05g50750;LOC_Os01g72700;LOC_Os06g50900;LOC_Os11g32100;LOC_Os12g07030;LOC_Os12g40920;LOC_Os09g28440;LOC_Os09g31522;LOC_Os04g43200;LOC_Os01g48570;LOC_Os09g08720;LOC_Os04g32110;LOC_Os05g07820;LOC_Os08g43600;LOC_Os06g40150;LOC_Os03g40100;LOC_Os01g…
GO:0050789	regulation of biological process	Biological Process	62	1	0.000747669	LOC_Os01g58640;LOC_Os07g44410;LOC_Os11g31940;LOC_Os11g46000;LOC_Os07g07040;LOC_Os05g39240;LOC_Os02g45930;LOC_Os04g32030;LOC_Os03g45760;LOC_Os05g43870;LOC_Os09g37600;LOC_Os01g11660;LOC_Os07g10840;LOC_Os03g08520;LOC_Os02g34490;LOC_Os01g12520;LOC_Os11g42960;LOC_Os05g11210;LOC_Os01g58280;LOC_Os10g39850;LOC_Os08g16030;LOC_Os02g53360;LOC_Os01g60340;LOC_Os04g40510;LOC_Os11g36940;LOC_Os02g33380;LOC_Os10g…
GO:0009759	indole glucosinolate biosynthetic process	Biological Process	13	1	0.000767328	LOC_Os02g41510;LOC_Os02g36890;LOC_Os02g49986;LOC_Os05g04820;LOC_Os12g07640;LOC_Os11g03440;LOC_Os12g03150;LOC_Os09g23620;LOC_Os06g14670;LOC_Os07g37210;LOC_Os08g33660;LOC_Os01g51260;LOC_Os12g33070
GO:0042542	response to hydrogen peroxide	Biological Process	40	1	0.000778444	LOC_Os03g13540;LOC_Os05g41490;LOC_Os10g07200;LOC_Os03g14180;LOC_Os03g16920;LOC_Os01g58850;LOC_Os02g13800;LOC_Os12g01530;LOC_Os01g36790;LOC_Os06g46900;LOC_Os02g54140;LOC_Os12g02300;LOC_Os06g35960;LOC_Os03g15960;LOC_Os04g37990;LOC_Os03g20120;LOC_Os04g01470;LOC_Os03g16030;LOC_Os11g01530;LOC_Os04g36750;LOC_Os03g47620;LOC_Os01g66890;LOC_Os01g04360;LOC_Os01g60600;LOC_Os04g31940;LOC_Os05g38530;LOC_Os05g…
GO:0009817	defense response to fungus, incompatible interaction	Biological Process	17	1	0.000783624	LOC_Os11g37950;LOC_Os08g43120;LOC_Os02g48450;LOC_Os01g53840;LOC_Os12g43450;LOC_Os01g57770;LOC_Os12g43490;LOC_Os09g16449;LOC_Os03g15050;LOC_Os11g37700;LOC_Os01g71810;LOC_Os01g08260;LOC_Os01g71820;LOC_Os02g21340;LOC_Os11g07912;LOC_Os01g66510;LOC_Os01g71474
GO:0048580	regulation of post-embryonic development	Biological Process	17	1	0.000783624	LOC_Os07g28890;LOC_Os11g01620;LOC_Os12g10660;LOC_Os07g02780;LOC_Os01g72700;LOC_Os05g25260;LOC_Os05g33690;LOC_Os04g48760;LOC_Os06g49100;LOC_Os03g21730;LOC_Os08g32060;LOC_Os02g52780;LOC_Os07g05190;LOC_Os01g48570;LOC_Os11g42450;LOC_Os08g05290;LOC_Os03g18630
GO:0080001	mucilage extrusion from seed coat	Biological Process	8	1	0.000790158	LOC_Os03g55350;LOC_Os09g26920;LOC_Os02g10520;LOC_Os04g03050;LOC_Os04g48416;LOC_Os03g02750;LOC_Os03g06290;LOC_Os10g25450
GO:0048359	mucilage metabolic process involved in seed coat development	Biological Process	8	1	0.000790158	LOC_Os09g26920;LOC_Os03g55350;LOC_Os04g48416;LOC_Os03g02750;LOC_Os02g10520;LOC_Os04g03050;LOC_Os03g06290;LOC_Os10g25450
GO:0070483	detection of hypoxia	Biological Process	6	1	0.000821063	LOC_Os03g08460;LOC_Os12g07030;LOC_Os02g52670;LOC_Os08g36920;LOC_Os09g28440;LOC_Os05g41780
GO:0051225	spindle assembly	Biological Process	11	1	0.000879136	LOC_Os04g30720;LOC_Os01g49200;LOC_Os12g39980;LOC_Os01g74146;LOC_Os03g52650;LOC_Os09g28580;LOC_Os05g38480;LOC_Os05g33890;LOC_Os04g28260;LOC_Os01g70560;LOC_Os07g32390
GO:0030243	cellulose metabolic process	Biological Process	12	1	0.000880542	LOC_Os07g02810;LOC_Os04g19740;LOC_Os06g01490;LOC_Os07g32660;LOC_Os06g14810;LOC_Os07g41320;LOC_Os01g34560;LOC_Os10g36390;LOC_Os06g46500;LOC_Os06g39750;LOC_Os11g37260;LOC_Os07g42420
GO:0042991	transcription factor import into nucleus	Biological Process	12	1	0.000880542	LOC_Os03g09170;LOC_Os09g28440;LOC_Os06g40150;LOC_Os04g52090;LOC_Os10g20470;LOC_Os12g07030;LOC_Os08g31580;LOC_Os08g44360;LOC_Os02g40900;LOC_Os05g25260;LOC_Os02g10760;LOC_Os08g36920
GO:0005982	starch metabolic process	Biological Process	17	1	0.000920266	LOC_Os03g50970;LOC_Os01g42294;LOC_Os07g41320;LOC_Os04g33740;LOC_Os03g18630;LOC_Os04g39610;LOC_Os07g48830;LOC_Os05g33890;LOC_Os07g31500;LOC_Os04g24430;LOC_Os04g17650;LOC_Os03g22120;LOC_Os05g40200;LOC_Os02g58480;LOC_Os07g05740;LOC_Os01g60330;LOC_Os01g49200
GO:0010325	raffinose family oligosaccharide biosynthetic process	Biological Process	8	1	0.000938404	LOC_Os07g10840;LOC_Os03g20120;LOC_Os12g02200;LOC_Os06g07600;LOC_Os09g25090;LOC_Os07g48830;LOC_Os01g10890;LOC_Os11g13670
GO:0009627	systemic acquired resistance	Biological Process	43	1	0.00093904	LOC_Os04g52310;LOC_Os02g44320;LOC_Os03g61670;LOC_Os09g37050;LOC_Os10g05600;LOC_Os07g35630;LOC_Os04g46830;LOC_Os06g43600;LOC_Os03g01320;LOC_Os08g10310;LOC_Os01g53840;LOC_Os06g48300;LOC_Os11g07680;LOC_Os05g04170;LOC_Os02g42620;LOC_Os10g25290;LOC_Os04g30040;LOC_Os04g47300;LOC_Os06g07220;LOC_Os04g40410;LOC_Os12g26290;LOC_Os04g52260;LOC_Os10g41480;LOC_Os05g44070;LOC_Os11g37950;LOC_Os04g55159;LOC_Os04g…
GO:0019216	regulation of lipid metabolic process	Biological Process	10	1	0.000951322	LOC_Os03g47730;LOC_Os02g10120;LOC_Os01g34560;LOC_Os08g39850;LOC_Os02g15750;LOC_Os06g39750;LOC_Os02g49680;LOC_Os08g39840;LOC_Os07g42420;LOC_Os06g14810
GO:0009816	defense response to bacterium, incompatible interaction	Biological Process	23	1	0.00095425	LOC_Os02g10120;LOC_Os08g18920;LOC_Os03g27370;LOC_Os01g53640;LOC_Os09g23560;LOC_Os03g18960;LOC_Os04g52950;LOC_Os03g05310;LOC_Os08g39840;LOC_Os05g44030;LOC_Os01g60600;LOC_Os03g44150;LOC_Os06g40170;LOC_Os08g39850;LOC_Os02g09740;LOC_Os11g44430;LOC_Os05g33080;LOC_Os07g40290;LOC_Os10g25550;LOC_Os01g44110;LOC_Os03g24930;LOC_Os02g35760;LOC_Os03g02740
GO:0007568	aging	Biological Process	14	1	0.000970628	LOC_Os09g07440;LOC_Os01g49720;LOC_Os12g24020;LOC_Os06g07941;LOC_Os10g38710;LOC_Os01g52160;LOC_Os02g43820;LOC_Os01g41200;LOC_Os10g38780;LOC_Os10g38470;LOC_Os03g18030;LOC_Os08g33710;LOC_Os04g17100;LOC_Os06g48160
GO:0046777	protein autophosphorylation	Biological Process	66	1	0.00103114	LOC_Os04g36070;LOC_Os08g10300;LOC_Os02g49950;LOC_Os03g45210;LOC_Os03g43670;LOC_Os01g53840;LOC_Os07g37850;LOC_Os04g47300;LOC_Os10g25550;LOC_Os06g36810;LOC_Os01g02060;LOC_Os02g42620;LOC_Os11g42410;LOC_Os07g02780;LOC_Os04g51040;LOC_Os01g26300;LOC_Os05g30820;LOC_Os05g03920;LOC_Os01g53640;LOC_Os01g57540;LOC_Os03g28300;LOC_Os11g12530;LOC_Os03g62314;LOC_Os08g18920;LOC_Os05g46760;LOC_Os05g42210;LOC_Os11g…
GO:0007165	signal transduction	Biological Process	81	1	0.00104564	LOC_Os08g45060;LOC_Os07g30620;LOC_Os01g09580;LOC_Os09g28840;LOC_Os03g14050;LOC_Os01g23970;LOC_Os02g05970;LOC_Os11g01620;LOC_Os04g58860;LOC_Os07g22580;LOC_Os04g43710;LOC_Os02g43560;LOC_Os09g18159;LOC_Os11g01040;LOC_Os10g38110;LOC_Os03g04530;LOC_Os02g40260;LOC_Os11g35450;LOC_Os10g05600;LOC_Os01g27230;LOC_Os07g37810;LOC_Os03g41390;LOC_Os08g32060;LOC_Os01g44360;LOC_Os11g10710;LOC_Os12g43490;LOC_Os12g…
GO:0009823	cytokinin catabolic process	Biological Process	4	1	0.00109514	LOC_Os08g35860;LOC_Os01g71310;LOC_Os10g34230;LOC_Os01g10110
GO:0045489	pectin biosynthetic process	Biological Process	8	1	0.0011081	LOC_Os11g01570;LOC_Os08g34020;LOC_Os03g18110;LOC_Os12g01560;LOC_Os03g18120;LOC_Os01g11810;LOC_Os05g28830;LOC_Os03g60300
GO:0008152	metabolic process	Biological Process	87	1	0.00113333	LOC_Os05g45100;LOC_Os02g14160;LOC_Os03g03350;LOC_Os04g27190;LOC_Os02g11700;LOC_Os07g05110;LOC_Os01g53330;LOC_Os01g20860;LOC_Os04g59190;LOC_Os01g10850;LOC_Os04g07110;LOC_Os03g22620;LOC_Os09g20090;LOC_Os03g40100;LOC_Os07g30620;LOC_Os02g57280;LOC_Os02g51900;LOC_Os04g44354;LOC_Os05g16980;LOC_Os12g40010;LOC_Os04g27670;LOC_Os11g01790;LOC_Os01g47580;LOC_Os05g49040;LOC_Os08g04500;LOC_Os03g27110;LOC_Os09g…
GO:0006950	response to stress	Biological Process	107	1	0.00114975	LOC_Os06g07300;LOC_Os03g45619;LOC_Os05g35380;LOC_Os01g06310;LOC_Os03g19290;LOC_Os07g40940;LOC_Os06g46680;LOC_Os07g07410;LOC_Os02g51680;LOC_Os04g45720;LOC_Os04g47420;LOC_Os05g42230;LOC_Os07g37230;LOC_Os03g05210;LOC_Os07g25810;LOC_Os03g60580;LOC_Os12g31710;LOC_Os08g34720;LOC_Os10g38780;LOC_Os05g28740;LOC_Os12g17570;LOC_Os05g47540;LOC_Os08g36680;LOC_Os06g20790;LOC_Os11g42170;LOC_Os07g33620;LOC_Os06g…
GO:0005976	polysaccharide metabolic process	Biological Process	28	1	0.00115718	LOC_Os03g20120;LOC_Os03g53540;LOC_Os05g33080;LOC_Os02g35760;LOC_Os08g45060;LOC_Os01g67360;LOC_Os02g05970;LOC_Os01g33950;LOC_Os02g46460;LOC_Os04g52780;LOC_Os05g34010;LOC_Os01g53640;LOC_Os08g01530;LOC_Os10g28120;LOC_Os03g21730;LOC_Os01g07360;LOC_Os03g22790;LOC_Os05g37700;LOC_Os04g46130;LOC_Os10g33370;LOC_Os11g42410;LOC_Os08g39590;LOC_Os02g58390;LOC_Os05g30820;LOC_Os07g02200;LOC_Os03g45210;LOC_Os06g…
GO:0009062	fatty acid catabolic process	Biological Process	19	1	0.00118297	LOC_Os03g63970;LOC_Os03g44810;LOC_Os03g18600;LOC_Os06g11730;LOC_Os01g45460;LOC_Os06g46920;LOC_Os03g17760;LOC_Os06g36670;LOC_Os04g46560;LOC_Os05g34854;LOC_Os02g51890;LOC_Os06g41060;LOC_Os09g31522;LOC_Os03g07180;LOC_Os08g42470;LOC_Os09g08720;LOC_Os11g42800;LOC_Os03g51910;LOC_Os04g53860
GO:0065007	biological regulation	Biological Process	23	1	0.0012148	LOC_Os02g50690;LOC_Os01g47780;LOC_Os07g10910;LOC_Os01g51890;LOC_Os03g42830;LOC_Os11g02610;LOC_Os04g51980;LOC_Os05g19910;LOC_Os06g02040;LOC_Os11g07830;LOC_Os09g25690;LOC_Os02g28220;LOC_Os04g46990;LOC_Os01g67810;LOC_Os05g45090;LOC_Os06g49660;LOC_Os06g50950;LOC_Os02g58530;LOC_Os09g35600;LOC_Os01g25484;LOC_Os10g11980;LOC_Os01g20830;LOC_Os12g12934
GO:0016569	covalent chromatin modification	Biological Process	12	1	0.00121585	LOC_Os07g35520;LOC_Os02g45170;LOC_Os07g40940;LOC_Os08g06550;LOC_Os07g35480;LOC_Os09g28580;LOC_Os07g35560;LOC_Os08g14700;LOC_Os03g54910;LOC_Os04g30720;LOC_Os02g56540;LOC_Os01g42070
GO:0009413	response to flooding	Biological Process	3	1	0.00121691	LOC_Os03g28330;LOC_Os03g22120;LOC_Os03g44150
GO:0010094	specification of carpel identity	Biological Process	5	1	0.00125438	LOC_Os11g42800;LOC_Os12g42160;LOC_Os12g39220;LOC_Os12g36100;LOC_Os03g02290
GO:0046470	phosphatidylcholine metabolic process	Biological Process	5	1	0.00125438	LOC_Os08g31060;LOC_Os06g40170;LOC_Os03g02740;LOC_Os01g20860;LOC_Os03g27370
GO:0071669	plant-type cell wall organization or biogenesis	Biological Process	16	1	0.00131968	LOC_Os09g04710;LOC_Os06g01966;LOC_Os01g72700;LOC_Os07g36690;LOC_Os01g66110;LOC_Os06g43044;LOC_Os05g33690;LOC_Os08g45060;LOC_Os03g20450;LOC_Os10g38800;LOC_Os02g01140;LOC_Os01g16310;LOC_Os11g12530;LOC_Os03g64170;LOC_Os01g61570;LOC_Os11g42450
GO:0010091	trichome branching	Biological Process	16	1	0.00131968	LOC_Os04g42950;LOC_Os12g10670;LOC_Os08g33660;LOC_Os05g50750;LOC_Os12g33070;LOC_Os07g49140;LOC_Os01g12660;LOC_Os04g48070;LOC_Os03g02290;LOC_Os04g36600;LOC_Os11g42800;LOC_Os01g74146;LOC_Os12g39980;LOC_Os01g55260;LOC_Os07g32390;LOC_Os12g39220
GO:0043900	regulation of multi-organism process	Biological Process	30	1	0.00135925	LOC_Os01g02580;LOC_Os01g02750;LOC_Os08g37180;LOC_Os12g07640;LOC_Os11g37700;LOC_Os02g49986;LOC_Os01g02400;LOC_Os02g36890;LOC_Os01g72460;LOC_Os06g14670;LOC_Os05g39240;LOC_Os01g02570;LOC_Os03g55850;LOC_Os03g28300;LOC_Os02g08440;LOC_Os08g43120;LOC_Os12g33070;LOC_Os03g21710;LOC_Os04g59370;LOC_Os06g47600;LOC_Os01g02600;LOC_Os01g64020;LOC_Os01g08260;LOC_Os02g21340;LOC_Os09g16449;LOC_Os07g37210;LOC_Os09g…
GO:0010054	trichoblast differentiation	Biological Process	23	1	0.00136655	LOC_Os11g38860;LOC_Os02g58720;LOC_Os01g57250;LOC_Os01g45700;LOC_Os07g47400;LOC_Os03g26490;LOC_Os03g02920;LOC_Os03g19600;LOC_Os02g40260;LOC_Os01g22352;LOC_Os07g25810;LOC_Os04g56180;LOC_Os07g32680;LOC_Os01g67360;LOC_Os03g60580;LOC_Os10g41430;LOC_Os02g16500;LOC_Os09g32964;LOC_Os08g06010;LOC_Os07g02440;LOC_Os06g07220;LOC_Os06g48030;LOC_Os02g04540
GO:0050794	regulation of cellular process	Biological Process	113	1	0.0013675	LOC_Os07g40940;LOC_Os06g40170;LOC_Os02g29640;LOC_Os07g35560;LOC_Os12g38120;LOC_Os08g41290;LOC_Os11g42410;LOC_Os02g07110;LOC_Os07g04150;LOC_Os07g37230;LOC_Os04g47420;LOC_Os07g25810;LOC_Os07g08320;LOC_Os08g01100;LOC_Os10g39970;LOC_Os04g53990;LOC_Os11g14140;LOC_Os01g03130;LOC_Os01g33080;LOC_Os03g26490;LOC_Os08g14700;LOC_Os08g34720;LOC_Os02g45010;LOC_Os06g08100;LOC_Os11g10300;LOC_Os06g03050;LOC_Os05g…
GO:0010480	microsporocyte differentiation	Biological Process	7	1	0.00139692	LOC_Os02g06140;LOC_Os10g32810;LOC_Os11g12620;LOC_Os03g04770;LOC_Os10g41550;LOC_Os08g05290;LOC_Os11g12530
GO:0045730	respiratory burst	Biological Process	7	1	0.00139692	LOC_Os02g58720;LOC_Os12g08920;LOC_Os01g22352;LOC_Os01g16450;LOC_Os12g34524;LOC_Os06g20150;LOC_Os10g39170
GO:0009901	anther dehiscence	Biological Process	14	1	0.00139741	LOC_Os10g42130;LOC_Os08g42350;LOC_Os02g10120;LOC_Os06g45580;LOC_Os08g39850;LOC_Os01g51260;LOC_Os04g34230;LOC_Os02g03750;LOC_Os08g01330;LOC_Os12g29220;LOC_Os02g30910;LOC_Os06g04090;LOC_Os01g19170;LOC_Os08g39840
GO:0070838	divalent metal ion transport	Biological Process	17	1	0.00145799	LOC_Os01g57370;LOC_Os12g09300;LOC_Os03g43440;LOC_Os08g35760;LOC_Os10g40600;LOC_Os04g56470;LOC_Os01g25540;LOC_Os06g45710;LOC_Os01g44110;LOC_Os01g25560;LOC_Os09g19710;LOC_Os05g49170;LOC_Os05g44030;LOC_Os03g06520;LOC_Os03g09940;LOC_Os02g01210;LOC_Os12g08090
GO:0080144	amino acid homeostasis	Biological Process	8	1	0.00152061	LOC_Os02g52930;LOC_Os06g01972;LOC_Os04g38600;LOC_Os01g36580;LOC_Os12g33300;LOC_Os04g59120;LOC_Os06g01966;LOC_Os03g05530
GO:0010229	inflorescence development	Biological Process	20	1	0.00152137	LOC_Os12g41910;LOC_Os09g35940;LOC_Os01g71310;LOC_Os10g34230;LOC_Os04g47300;LOC_Os02g42380;LOC_Os01g50410;LOC_Os10g32900;LOC_Os06g30370;LOC_Os01g10110;LOC_Os02g04640;LOC_Os05g46760;LOC_Os05g46750;LOC_Os08g35860;LOC_Os01g50370;LOC_Os05g40960;LOC_Os01g50400;LOC_Os11g05470;LOC_Os01g61900;LOC_Os01g12490
GO:0050826	response to freezing	Biological Process	19	1	0.00166064	LOC_Os01g10320;LOC_Os04g32110;LOC_Os03g37960;LOC_Os12g40920;LOC_Os03g60300;LOC_Os03g09170;LOC_Os03g43670;LOC_Os04g43200;LOC_Os05g28830;LOC_Os11g32100;LOC_Os05g25260;LOC_Os03g18120;LOC_Os08g43600;LOC_Os06g40150;LOC_Os03g40100;LOC_Os11g01570;LOC_Os08g06550;LOC_Os12g01560;LOC_Os06g50900
GO:0071456	cellular response to hypoxia	Biological Process	16	1	0.00166657	LOC_Os06g48030;LOC_Os08g37180;LOC_Os02g13800;LOC_Os12g08920;LOC_Os02g52670;LOC_Os04g56180;LOC_Os03g08460;LOC_Os08g36920;LOC_Os07g48060;LOC_Os06g35960;LOC_Os07g40290;LOC_Os03g02920;LOC_Os10g39170;LOC_Os09g28440;LOC_Os12g02080;LOC_Os03g53340
GO:0032973	amino acid export	Biological Process	7	1	0.00167036	LOC_Os04g59120;LOC_Os03g05530;LOC_Os06g01966;LOC_Os01g36580;LOC_Os12g33300;LOC_Os02g52930;LOC_Os06g01972
GO:0048831	regulation of shoot system development	Biological Process	9	1	0.00171058	LOC_Os04g36070;LOC_Os10g41550;LOC_Os11g04720;LOC_Os04g57720;LOC_Os10g32810;LOC_Os12g04500;LOC_Os03g04770;LOC_Os01g72330;LOC_Os02g35180
GO:0048453	sepal formation	Biological Process	12	1	0.00182108	LOC_Os04g32110;LOC_Os06g03710;LOC_Os02g56540;LOC_Os03g02290;LOC_Os12g39980;LOC_Os12g16210;LOC_Os12g42160;LOC_Os08g31850;LOC_Os01g08150;LOC_Os01g64020;LOC_Os04g28260;LOC_Os02g10020
GO:0009704	de-etiolation	Biological Process	11	1	0.00193177	LOC_Os10g38470;LOC_Os10g38780;LOC_Os02g49680;LOC_Os10g38730;LOC_Os01g41240;LOC_Os01g49720;LOC_Os03g10620;LOC_Os03g13540;LOC_Os01g49710;LOC_Os10g38710;LOC_Os10g38360
GO:0010439	regulation of glucosinolate biosynthetic process	Biological Process	11	1	0.00193177	LOC_Os04g42950;LOC_Os12g07640;LOC_Os05g04820;LOC_Os02g49986;LOC_Os02g36890;LOC_Os08g33660;LOC_Os12g03150;LOC_Os11g03440;LOC_Os07g37210;LOC_Os06g14670;LOC_Os09g23620
GO:0009828	plant-type cell wall loosening	Biological Process	9	1	0.00194758	LOC_Os05g39990;LOC_Os02g51040;LOC_Os03g21820;LOC_Os02g42650;LOC_Os02g44108;LOC_Os06g41700;LOC_Os01g60770;LOC_Os06g50400;LOC_Os07g31390
GO:0015824	proline transport	Biological Process	19	1	0.00201897	LOC_Os01g21034;LOC_Os10g38710;LOC_Os01g49710;LOC_Os06g49220;LOC_Os10g02100;LOC_Os04g41960;LOC_Os12g12470;LOC_Os12g06060;LOC_Os10g38360;LOC_Os03g10620;LOC_Os01g49720;LOC_Os05g49700;LOC_Os08g33710;LOC_Os02g46460;LOC_Os11g05410;LOC_Os10g38730;LOC_Os06g07030;LOC_Os10g38780;LOC_Os10g38470
GO:0010089	xylem development	Biological Process	23	1	0.0020325	LOC_Os01g60330;LOC_Os08g01330;LOC_Os03g42630;LOC_Os06g48160;LOC_Os08g13920;LOC_Os03g62090;LOC_Os05g40200;LOC_Os02g50040;LOC_Os03g18120;LOC_Os04g51460;LOC_Os07g14850;LOC_Os11g01570;LOC_Os06g43860;LOC_Os12g24020;LOC_Os01g71310;LOC_Os10g34230;LOC_Os11g12620;LOC_Os01g10320;LOC_Os06g48180;LOC_Os08g05290;LOC_Os07g22580;LOC_Os02g34970;LOC_Os03g39020
GO:0006825	copper ion transport	Biological Process	5	1	0.0021651	LOC_Os12g29220;LOC_Os08g42350;LOC_Os03g64340;LOC_Os02g55134;LOC_Os02g30910
GO:0080175	phragmoplast microtubule organization	Biological Process	5	1	0.0021651	LOC_Os04g28260;LOC_Os12g39980;LOC_Os12g42160;LOC_Os12g36100;LOC_Os03g02290
GO:0022900	electron transport chain	Biological Process	34	1	0.00219041	LOC_Os06g39780;LOC_Os03g21000;LOC_Os02g43660;LOC_Os03g05310;LOC_Os04g51160;LOC_Os08g36500;LOC_Os05g11130;LOC_Os10g05490;LOC_Os10g34230;LOC_Os01g57880;LOC_Os07g02100;LOC_Os01g25484;LOC_Os07g48510;LOC_Os04g46130;LOC_Os07g02120;LOC_Os02g06140;LOC_Os02g53130;LOC_Os01g10110;LOC_Os10g38110;LOC_Os02g10120;LOC_Os08g39840;LOC_Os01g09830;LOC_Os10g37110;LOC_Os05g48200;LOC_Os01g11340;LOC_Os01g71310;LOC_Os01g…
GO:0019722	calcium-mediated signaling	Biological Process	20	1	0.00221286	LOC_Os01g11350;LOC_Os05g44030;LOC_Os01g21420;LOC_Os01g53640;LOC_Os06g46950;LOC_Os02g52780;LOC_Os01g25560;LOC_Os09g25100;LOC_Os09g28500;LOC_Os09g25090;LOC_Os12g02200;LOC_Os01g25540;LOC_Os01g44110;LOC_Os07g48760;LOC_Os03g43440;LOC_Os09g23300;LOC_Os01g10890;LOC_Os12g35670;LOC_Os01g64730;LOC_Os12g41110
GO:0009266	response to temperature stimulus	Biological Process	24	1	0.00225229	LOC_Os01g73980;LOC_Os05g25350;LOC_Os04g02050;LOC_Os01g44130;LOC_Os03g62090;LOC_Os01g44360;LOC_Os11g03370;LOC_Os04g08350;LOC_Os12g10660;LOC_Os02g34600;LOC_Os07g14850;LOC_Os06g11330;LOC_Os04g19740;LOC_Os02g07870;LOC_Os11g05290;LOC_Os02g48450;LOC_Os02g44870;LOC_Os09g37910;LOC_Os04g53950;LOC_Os01g33160;LOC_Os03g60560;LOC_Os07g41320;LOC_Os05g01810;LOC_Os01g72460
GO:1901137	carbohydrate derivative biosynthetic process	Biological Process	14	1	0.00232306	LOC_Os09g38910;LOC_Os11g35860;LOC_Os09g26920;LOC_Os01g58280;LOC_Os10g25450;LOC_Os03g06290;LOC_Os02g16940;LOC_Os04g03050;LOC_Os08g39240;LOC_Os03g55350;LOC_Os04g29680;LOC_Os11g35240;LOC_Os04g51040;LOC_Os05g50750
GO:0046185	aldehyde catabolic process	Biological Process	3	1	0.00234159	LOC_Os02g56920;LOC_Os10g33250;LOC_Os02g29640
GO:0002215	defense response to nematode	Biological Process	8	1	0.00235766	LOC_Os12g02080;LOC_Os03g22020;LOC_Os09g32964;LOC_Os02g14160;LOC_Os10g02040;LOC_Os01g10850;LOC_Os01g16450;LOC_Os04g56180
GO:0043622	cortical microtubule organization	Biological Process	11	1	0.00237255	LOC_Os01g50410;LOC_Os01g55260;LOC_Os01g49200;LOC_Os02g18410;LOC_Os01g50420;LOC_Os01g12660;LOC_Os05g46760;LOC_Os07g02780;LOC_Os05g50750;LOC_Os05g33890;LOC_Os03g50970
GO:0009835	fruit ripening	Biological Process	4	1	0.00237829	LOC_Os09g27750;LOC_Os05g05670;LOC_Os05g05680;LOC_Os09g27820
GO:0031668	cellular response to extracellular stimulus	Biological Process	13	1	0.00239747	LOC_Os10g38360;LOC_Os01g49710;LOC_Os06g39780;LOC_Os01g23970;LOC_Os10g05490;LOC_Os01g58280;LOC_Os03g06290;LOC_Os02g36110;LOC_Os04g03050;LOC_Os10g38730;LOC_Os02g16940;LOC_Os11g02300;LOC_Os11g10710
GO:0044711	single-organism biosynthetic process	Biological Process	25	1	0.00246219	LOC_Os01g52160;LOC_Os09g34214;LOC_Os03g04250;LOC_Os03g15340;LOC_Os01g50370;LOC_Os12g04080;LOC_Os01g53330;LOC_Os10g37340;LOC_Os09g37050;LOC_Os01g57690;LOC_Os05g37660;LOC_Os01g05840;LOC_Os01g50410;LOC_Os02g28220;LOC_Os06g02900;LOC_Os04g45690;LOC_Os01g55240;LOC_Os02g41954;LOC_Os08g02230;LOC_Os10g18820;LOC_Os05g34010;LOC_Os04g17100;LOC_Os02g46460;LOC_Os01g50400;LOC_Os07g38290
GO:0015804	neutral amino acid transport	Biological Process	6	1	0.00246423	LOC_Os02g01210;LOC_Os04g56470;LOC_Os12g09300;LOC_Os04g41350;LOC_Os12g08090;LOC_Os03g60260
GO:0019761	glucosinolate biosynthetic process	Biological Process	31	1	0.00247948	LOC_Os04g02050;LOC_Os11g42510;LOC_Os02g47790;LOC_Os07g14850;LOC_Os03g18600;LOC_Os06g23684;LOC_Os09g23560;LOC_Os12g17160;LOC_Os03g06520;LOC_Os10g30290;LOC_Os08g37940;LOC_Os04g48416;LOC_Os06g36670;LOC_Os02g52930;LOC_Os03g62090;LOC_Os06g45710;LOC_Os10g40600;LOC_Os04g08350;LOC_Os02g49480;LOC_Os06g12370;LOC_Os01g26300;LOC_Os10g28420;LOC_Os03g04130;LOC_Os01g06640;LOC_Os07g05460;LOC_Os03g64170;LOC_Os03g…
GO:0050896	response to stimulus	Biological Process	89	1	0.00252631	LOC_Os02g07110;LOC_Os01g10490;LOC_Os04g10890;LOC_Os12g04080;LOC_Os03g59460;LOC_Os11g31060;LOC_Os12g43110;LOC_Os01g42900;LOC_Os03g15460;LOC_Os03g06570;LOC_Os06g36810;LOC_Os01g40550;LOC_Os04g30720;LOC_Os01g03130;LOC_Os01g71170;LOC_Os11g12530;LOC_Os05g12040;LOC_Os07g10910;LOC_Os05g46350;LOC_Os01g14850;LOC_Os04g56680;LOC_Os01g05840;LOC_Os04g51660;LOC_Os11g14140;LOC_Os03g18850;LOC_Os04g02520;LOC_Os08g…
GO:0009793	embryo development ending in seed dormancy	Biological Process	76	1	0.00252952	LOC_Os01g34560;LOC_Os06g50900;LOC_Os01g47690;LOC_Os02g47420;LOC_Os01g64360;LOC_Os03g27370;LOC_Os01g72330;LOC_Os02g53200;LOC_Os06g07030;LOC_Os04g49980;LOC_Os04g59320;LOC_Os08g43600;LOC_Os02g35180;LOC_Os01g44390;LOC_Os06g39750;LOC_Os12g04500;LOC_Os01g10370;LOC_Os01g03710;LOC_Os04g49130;LOC_Os09g30160;LOC_Os01g12580;LOC_Os05g38000;LOC_Os05g30820;LOC_Os11g01530;LOC_Os11g42450;LOC_Os04g36070;LOC_Os01g…
GO:0015773	raffinose transport	Biological Process	2	1	0.00258741	LOC_Os03g20120;LOC_Os07g48830
GO:0071465	cellular response to desiccation	Biological Process	2	1	0.00258741	LOC_Os03g20120;LOC_Os07g48830
GO:1901697	olivetolic acid biosynthetic process	Biological Process	2	1	0.00258741	LOC_Os01g33160;LOC_Os11g05290
GO:0052576	carbohydrate storage	Biological Process	2	1	0.00258741	LOC_Os07g48830;LOC_Os03g20120
GO:0006865	amino acid transport	Biological Process	39	1	0.00261728	LOC_Os01g15039;LOC_Os01g57854;LOC_Os01g27760;LOC_Os03g01300;LOC_Os03g43720;LOC_Os01g09100;LOC_Os07g18230;LOC_Os11g02840;LOC_Os01g02370;LOC_Os08g36920;LOC_Os05g40200;LOC_Os10g20890;LOC_Os03g24930;LOC_Os09g28440;LOC_Os12g07030;LOC_Os01g42294;LOC_Os03g50960;LOC_Os09g23560;LOC_Os02g43560;LOC_Os01g41420;LOC_Os04g55159;LOC_Os04g33740;LOC_Os02g52670;LOC_Os01g04230;LOC_Os06g07220;LOC_Os02g02460;LOC_Os01g…
GO:0010143	cutin biosynthetic process	Biological Process	7	1	0.00274479	LOC_Os02g10760;LOC_Os11g35400;LOC_Os01g63580;LOC_Os05g04170;LOC_Os06g40150;LOC_Os08g44840;LOC_Os10g33250
GO:0006814	sodium ion transport	Biological Process	7	1	0.00274479	LOC_Os09g31130;LOC_Os12g42910;LOC_Os09g25090;LOC_Os01g20160;LOC_Os04g51820;LOC_Os02g21009;LOC_Os08g39370
GO:0009800	cinnamic acid biosynthetic process	Biological Process	15	1	0.00299055	LOC_Os01g51260;LOC_Os06g14670;LOC_Os12g37690;LOC_Os07g37210;LOC_Os03g20090;LOC_Os05g04820;LOC_Os02g41510;LOC_Os12g33070;LOC_Os08g33660;LOC_Os01g45090;LOC_Os11g03440;LOC_Os12g03150;LOC_Os12g07640;LOC_Os04g42950;LOC_Os02g36890
GO:0006955	immune response	Biological Process	11	1	0.003183	LOC_Os07g31500;LOC_Os09g37600;LOC_Os02g53000;LOC_Os09g18159;LOC_Os09g18230;LOC_Os04g52780;LOC_Os07g05740;LOC_Os09g27890;LOC_Os04g48760;LOC_Os02g08440;LOC_Os05g07820
GO:0009410	response to xenobiotic stimulus	Biological Process	14	1	0.00318461	LOC_Os11g32100;LOC_Os09g39410;LOC_Os01g09830;LOC_Os05g48340;LOC_Os06g04850;LOC_Os01g55150;LOC_Os01g64730;LOC_Os01g64020;LOC_Os09g24810;LOC_Os08g43600;LOC_Os02g52780;LOC_Os08g44360;LOC_Os01g47760;LOC_Os06g50900
GO:0009971	anastral spindle assembly involved in male meiosis	Biological Process	4	1	0.00329778	LOC_Os03g02290;LOC_Os12g36100;LOC_Os11g42800;LOC_Os12g42160
GO:0009814	defense response, incompatible interaction	Biological Process	22	1	0.0033189	LOC_Os08g34170;LOC_Os11g36160;LOC_Os01g33950;LOC_Os07g26660;LOC_Os07g02780;LOC_Os10g31910;LOC_Os06g45710;LOC_Os01g50410;LOC_Os11g02570;LOC_Os04g52250;LOC_Os05g46750;LOC_Os09g21120;LOC_Os08g32060;LOC_Os03g62314;LOC_Os01g50420;LOC_Os07g34720;LOC_Os04g58810;LOC_Os10g25030;LOC_Os01g50400;LOC_Os04g05050;LOC_Os07g26630;LOC_Os01g50370
GO:0016998	cell wall macromolecule catabolic process	Biological Process	11	1	0.00349778	LOC_Os04g41620;LOC_Os05g33130;LOC_Os09g27890;LOC_Os03g13570;LOC_Os02g53000;LOC_Os01g53840;LOC_Os02g46910;LOC_Os03g01800;LOC_Os09g37600;LOC_Os04g41640;LOC_Os10g02770
GO:0006944	membrane fusion	Biological Process	46	1	0.00353443	LOC_Os07g04040;LOC_Os03g55850;LOC_Os01g16650;LOC_Os02g43560;LOC_Os02g41780;LOC_Os01g48570;LOC_Os05g44070;LOC_Os04g51610;LOC_Os05g39240;LOC_Os03g03980;LOC_Os04g59320;LOC_Os01g12660;LOC_Os06g11330;LOC_Os03g52650;LOC_Os03g18960;LOC_Os08g02070;LOC_Os08g38400;LOC_Os06g48300;LOC_Os02g47420;LOC_Os03g56820;LOC_Os03g54000;LOC_Os04g59370;LOC_Os04g38780;LOC_Os02g02830;LOC_Os01g62990;LOC_Os11g45540;LOC_Os07g…
GO:0042761	very long-chain fatty acid biosynthetic process	Biological Process	9	1	0.00355352	LOC_Os05g37250;LOC_Os01g63930;LOC_Os03g04530;LOC_Os06g03930;LOC_Os02g44654;LOC_Os10g38110;LOC_Os01g63540;LOC_Os11g03440;LOC_Os12g03150
GO:0042631	cellular response to water deprivation	Biological Process	25	1	0.00363661	LOC_Os01g09100;LOC_Os09g32670;LOC_Os03g43440;LOC_Os01g11340;LOC_Os10g38710;LOC_Os01g52770;LOC_Os05g44200;LOC_Os09g25090;LOC_Os07g48760;LOC_Os01g49720;LOC_Os05g04700;LOC_Os03g17790;LOC_Os10g38780;LOC_Os03g55850;LOC_Os02g43560;LOC_Os09g34214;LOC_Os01g64110;LOC_Os05g03130;LOC_Os05g49170;LOC_Os09g25100;LOC_Os10g38470;LOC_Os10g37340;LOC_Os01g20860;LOC_Os01g60600;LOC_Os03g14420
GO:0043086	negative regulation of catalytic activity	Biological Process	21	1	0.00372253	LOC_Os04g47170;LOC_Os02g10520;LOC_Os04g48416;LOC_Os03g38170;LOC_Os02g54190;LOC_Os09g26920;LOC_Os01g58280;LOC_Os01g57854;LOC_Os03g55350;LOC_Os01g21034;LOC_Os01g15039;LOC_Os02g33380;LOC_Os06g09340;LOC_Os03g02750;LOC_Os08g01670;LOC_Os09g26360;LOC_Os02g53840;LOC_Os03g06290;LOC_Os10g25450;LOC_Os04g03050;LOC_Os02g16940
GO:0010030	positive regulation of seed germination	Biological Process	11	1	0.00383699	LOC_Os01g46760;LOC_Os05g41780;LOC_Os01g62760;LOC_Os04g58710;LOC_Os11g05470;LOC_Os03g16170;LOC_Os06g30370;LOC_Os11g12530;LOC_Os05g49730;LOC_Os05g38290;LOC_Os09g15670
GO:0065008	regulation of biological quality	Biological Process	33	1	0.00384311	LOC_Os04g38780;LOC_Os05g07820;LOC_Os01g48570;LOC_Os07g05190;LOC_Os01g07300;LOC_Os12g36100;LOC_Os04g48760;LOC_Os07g05740;LOC_Os12g40900;LOC_Os05g43870;LOC_Os05g38480;LOC_Os12g42160;LOC_Os02g57110;LOC_Os02g05970;LOC_Os02g46910;LOC_Os03g58350;LOC_Os08g05290;LOC_Os12g39980;LOC_Os11g42450;LOC_Os03g41390;LOC_Os02g05940;LOC_Os02g20540;LOC_Os06g49100;LOC_Os10g02770;LOC_Os03g43670;LOC_Os01g53880;LOC_Os03g…
GO:0010154	fruit development	Biological Process	15	1	0.00397657	LOC_Os06g03930;LOC_Os01g63540;LOC_Os05g37250;LOC_Os01g63930;LOC_Os02g44654;LOC_Os03g47730;LOC_Os03g01800;LOC_Os02g46910;LOC_Os06g07941;LOC_Os09g35940;LOC_Os03g13570;LOC_Os01g06640;LOC_Os03g18030;LOC_Os10g02770;LOC_Os10g38110
GO:0048504	regulation of timing of organ formation	Biological Process	8	1	0.00399063	LOC_Os08g10080;LOC_Os11g03370;LOC_Os08g01330;LOC_Os03g42630;LOC_Os11g29720;LOC_Os09g35940;LOC_Os06g04090;LOC_Os03g21030
GO:0016197	endosomal transport	Biological Process	8	1	0.00399063	LOC_Os12g29400;LOC_Os01g16650;LOC_Os03g03980;LOC_Os03g52650;LOC_Os01g55260;LOC_Os01g12660;LOC_Os04g44500;LOC_Os02g02830
GO:0044237	cellular metabolic process	Biological Process	67	1	0.0040111	LOC_Os03g14654;LOC_Os09g31522;LOC_Os12g17570;LOC_Os02g51910;LOC_Os09g08720;LOC_Os01g53820;LOC_Os02g50690;LOC_Os03g12820;LOC_Os12g43720;LOC_Os01g57690;LOC_Os07g14600;LOC_Os08g31200;LOC_Os02g53840;LOC_Os12g08850;LOC_Os04g47170;LOC_Os03g38470;LOC_Os03g15340;LOC_Os06g39880;LOC_Os01g61570;LOC_Os02g44320;LOC_Os04g45720;LOC_Os07g07410;LOC_Os12g35670;LOC_Os01g57880;LOC_Os03g64340;LOC_Os06g51320;LOC_Os01g…
GO:0009813	flavonoid biosynthetic process	Biological Process	26	1	0.00405026	LOC_Os03g10620;LOC_Os01g08220;LOC_Os03g20090;LOC_Os09g35940;LOC_Os10g37110;LOC_Os11g03440;LOC_Os01g53430;LOC_Os04g49210;LOC_Os04g51660;LOC_Os01g55240;LOC_Os02g49986;LOC_Os11g29720;LOC_Os05g44600;LOC_Os03g18030;LOC_Os01g53330;LOC_Os02g41510;LOC_Os03g14420;LOC_Os09g34214;LOC_Os05g08750;LOC_Os07g07410;LOC_Os12g03150;LOC_Os01g45090;LOC_Os08g02030;LOC_Os06g46680;LOC_Os10g40960;LOC_Os01g70930
GO:0009911	positive regulation of flower development	Biological Process	19	1	0.00416991	LOC_Os05g11130;LOC_Os01g64730;LOC_Os01g70730;LOC_Os08g43600;LOC_Os12g41910;LOC_Os08g41320;LOC_Os06g11330;LOC_Os07g47450;LOC_Os11g02300;LOC_Os06g30370;LOC_Os02g06140;LOC_Os04g47300;LOC_Os06g41060;LOC_Os02g55250;LOC_Os12g40920;LOC_Os11g05470;LOC_Os01g12490;LOC_Os08g42470;LOC_Os03g51910
GO:0000904	cell morphogenesis involved in differentiation	Biological Process	10	1	0.00417719	LOC_Os06g49100;LOC_Os01g33040;LOC_Os03g39020;LOC_Os05g38480;LOC_Os03g26490;LOC_Os02g04540;LOC_Os04g59540;LOC_Os01g08470;LOC_Os10g05750;LOC_Os03g19600
GO:0000914	phragmoplast assembly	Biological Process	5	1	0.00431847	LOC_Os12g42160;LOC_Os04g28260;LOC_Os12g39980;LOC_Os03g02290;LOC_Os12g36100
GO:0048481	ovule development	Biological Process	37	1	0.00431901	LOC_Os02g04640;LOC_Os07g37810;LOC_Os01g20780;LOC_Os11g01530;LOC_Os04g53860;LOC_Os08g02070;LOC_Os03g11600;LOC_Os03g05310;LOC_Os06g14810;LOC_Os01g61570;LOC_Os04g48070;LOC_Os08g42470;LOC_Os01g34560;LOC_Os01g26300;LOC_Os06g16300;LOC_Os02g40900;LOC_Os04g42950;LOC_Os06g45710;LOC_Os10g30290;LOC_Os03g20090;LOC_Os12g37690;LOC_Os09g31522;LOC_Os02g51890;LOC_Os06g41060;LOC_Os09g08720;LOC_Os03g51910;LOC_Os04g…
GO:0007020	microtubule nucleation	Biological Process	18	1	0.00438281	LOC_Os06g16300;LOC_Os02g06140;LOC_Os01g22980;LOC_Os01g60330;LOC_Os08g34380;LOC_Os01g49200;LOC_Os05g40200;LOC_Os03g04770;LOC_Os08g07890;LOC_Os05g46350;LOC_Os05g33890;LOC_Os10g32810;LOC_Os11g12620;LOC_Os01g42294;LOC_Os10g41550;LOC_Os01g53840;LOC_Os03g50970;LOC_Os01g61690
GO:0051782	negative regulation of cell division	Biological Process	9	1	0.00443018	LOC_Os10g42130;LOC_Os03g42630;LOC_Os08g01330;LOC_Os11g03370;LOC_Os08g10080;LOC_Os09g29360;LOC_Os03g21030;LOC_Os03g08930;LOC_Os06g04090
GO:0046466	membrane lipid catabolic process	Biological Process	4	1	0.0044324	LOC_Os06g40170;LOC_Os03g27370;LOC_Os03g02740;LOC_Os08g31060
GO:0080029	cellular response to boron-containing substance levels	Biological Process	4	1	0.0044324	LOC_Os10g36924;LOC_Os01g08020;LOC_Os12g37840;LOC_Os06g12310
GO:0010098	suspensor development	Biological Process	4	1	0.0044324	LOC_Os04g17650;LOC_Os02g58480;LOC_Os03g22120;LOC_Os04g24430
GO:0034638	phosphatidylcholine catabolic process	Biological Process	4	1	0.0044324	LOC_Os03g02740;LOC_Os08g31060;LOC_Os06g40170;LOC_Os03g27370
GO:0010161	red light signaling pathway	Biological Process	8	1	0.00450992	LOC_Os12g04500;LOC_Os01g72330;LOC_Os06g48300;LOC_Os04g36070;LOC_Os10g32900;LOC_Os04g57720;LOC_Os11g04720;LOC_Os01g61900
GO:0012501	programmed cell death	Biological Process	13	1	0.00458642	LOC_Os04g30030;LOC_Os09g21120;LOC_Os02g06930;LOC_Os08g32060;LOC_Os06g03720;LOC_Os01g23970;LOC_Os03g57080;LOC_Os01g71320;LOC_Os07g35630;LOC_Os07g35750;LOC_Os07g35004;LOC_Os10g17960;LOC_Os02g42620
GO:0000038	very long-chain fatty acid metabolic process	Biological Process	11	1	0.00459397	LOC_Os10g33370;LOC_Os05g44200;LOC_Os06g44300;LOC_Os06g14810;LOC_Os03g56820;LOC_Os01g63580;LOC_Os06g39750;LOC_Os07g42420;LOC_Os06g29180;LOC_Os01g52770;LOC_Os01g34560
GO:0009926	auxin polar transport	Biological Process	21	1	0.00459711	LOC_Os02g21340;LOC_Os01g63580;LOC_Os07g02780;LOC_Os03g03810;LOC_Os01g60330;LOC_Os01g50410;LOC_Os12g40890;LOC_Os11g33270;LOC_Os10g31910;LOC_Os05g40200;LOC_Os07g41320;LOC_Os01g42294;LOC_Os01g50420;LOC_Os09g39910;LOC_Os05g46750;LOC_Os04g05050;LOC_Os05g37470;LOC_Os11g12620;LOC_Os01g63770;LOC_Os01g50400;LOC_Os07g22580
GO:0019748	secondary metabolic process	Biological Process	18	1	0.00492432	LOC_Os07g42420;LOC_Os02g10120;LOC_Os02g26480;LOC_Os08g39840;LOC_Os02g15750;LOC_Os01g41240;LOC_Os09g34214;LOC_Os08g39850;LOC_Os05g50750;LOC_Os07g07410;LOC_Os05g45100;LOC_Os03g47730;LOC_Os02g41954;LOC_Os10g33370;LOC_Os01g55240;LOC_Os03g52070;LOC_Os04g46990;LOC_Os06g02900
GO:0016131	brassinosteroid metabolic process	Biological Process	11	1	0.00501445	LOC_Os01g43740;LOC_Os07g05460;LOC_Os07g23570;LOC_Os12g17160;LOC_Os07g48330;LOC_Os03g25490;LOC_Os06g39880;LOC_Os05g08480;LOC_Os01g43750;LOC_Os02g11700;LOC_Os01g45140
GO:0002237	response to molecule of bacterial origin	Biological Process	18	1	0.00521497	LOC_Os01g02370;LOC_Os01g02400;LOC_Os07g40290;LOC_Os07g05740;LOC_Os01g02060;LOC_Os04g48760;LOC_Os01g02600;LOC_Os03g03570;LOC_Os08g37180;LOC_Os01g02750;LOC_Os01g02580;LOC_Os01g72700;LOC_Os04g52950;LOC_Os03g55850;LOC_Os01g02570;LOC_Os06g48300;LOC_Os05g39240;LOC_Os03g21730
GO:0048451	petal formation	Biological Process	12	1	0.00524291	LOC_Os04g32110;LOC_Os06g03710;LOC_Os02g56540;LOC_Os12g39980;LOC_Os03g02290;LOC_Os12g42160;LOC_Os08g31850;LOC_Os12g16210;LOC_Os02g10020;LOC_Os04g28260;LOC_Os01g64020;LOC_Os01g08150
GO:0000041	transition metal ion transport	Biological Process	24	1	0.00543783	LOC_Os12g08920;LOC_Os01g43750;LOC_Os07g35140;LOC_Os02g44654;LOC_Os01g22352;LOC_Os09g16950;LOC_Os04g30030;LOC_Os07g04040;LOC_Os02g58720;LOC_Os11g05470;LOC_Os03g06520;LOC_Os12g24020;LOC_Os11g10460;LOC_Os02g51680;LOC_Os01g43740;LOC_Os06g30370;LOC_Os10g17960;LOC_Os07g35750;LOC_Os07g35004;LOC_Os04g30040;LOC_Os01g63540;LOC_Os08g02120;LOC_Os12g41690;LOC_Os03g09940
GO:0046165	alcohol biosynthetic process	Biological Process	9	1	0.00546665	LOC_Os08g38270;LOC_Os09g25700;LOC_Os09g25690;LOC_Os07g02200;LOC_Os04g46130;LOC_Os03g18630;LOC_Os10g33370;LOC_Os11g01620;LOC_Os01g04230
GO:0006636	unsaturated fatty acid biosynthetic process	Biological Process	17	1	0.00548374	LOC_Os12g01370;LOC_Os02g49680;LOC_Os06g39750;LOC_Os06g23684;LOC_Os02g49480;LOC_Os08g39850;LOC_Os01g34560;LOC_Os07g49310;LOC_Os02g34600;LOC_Os06g14810;LOC_Os08g39840;LOC_Os02g15750;LOC_Os01g06640;LOC_Os03g18070;LOC_Os07g42420;LOC_Os04g43200;LOC_Os02g10120
GO:0040008	regulation of growth	Biological Process	10	1	0.00556296	LOC_Os06g39880;LOC_Os10g38800;LOC_Os11g42450;LOC_Os06g49100;LOC_Os02g06150;LOC_Os02g58390;LOC_Os03g21730;LOC_Os04g59190;LOC_Os03g03570;LOC_Os01g72700
GO:0010311	lateral root formation	Biological Process	15	1	0.00556648	LOC_Os08g39850;LOC_Os05g50750;LOC_Os08g37180;LOC_Os05g30820;LOC_Os03g40100;LOC_Os01g12660;LOC_Os11g35400;LOC_Os02g10120;LOC_Os05g04170;LOC_Os03g43670;LOC_Os04g32110;LOC_Os08g39840;LOC_Os01g63770;LOC_Os05g37470;LOC_Os01g55260
GO:0005985	sucrose metabolic process	Biological Process	7	1	0.00562098	LOC_Os03g22120;LOC_Os02g01590;LOC_Os02g34600;LOC_Os04g24430;LOC_Os04g17650;LOC_Os03g28330;LOC_Os02g58480
GO:0009641	shade avoidance	Biological Process	7	1	0.00562098	LOC_Os04g45690;LOC_Os10g32900;LOC_Os06g04870;LOC_Os06g04850;LOC_Os12g10660;LOC_Os01g61900;LOC_Os03g12860
GO:0010466	negative regulation of peptidase activity	Biological Process	7	1	0.00562098	LOC_Os01g03340;LOC_Os01g03680;LOC_Os01g03390;LOC_Os01g03360;LOC_Os01g03320;LOC_Os03g60840;LOC_Os12g25090
GO:2000605	positive regulation of secondary growth	Biological Process	4	1	0.00580313	LOC_Os01g04230;LOC_Os05g40200;LOC_Os01g42294;LOC_Os01g60330
GO:0010497	plasmodesmata-mediated intercellular transport	Biological Process	6	1	0.00583324	LOC_Os05g10830;LOC_Os01g50900;LOC_Os05g19670;LOC_Os01g72290;LOC_Os03g44880;LOC_Os01g18170
GO:0060560	developmental growth involved in morphogenesis	Biological Process	30	1	0.00584707	LOC_Os11g44430;LOC_Os04g48760;LOC_Os01g66110;LOC_Os02g05970;LOC_Os07g25810;LOC_Os11g12530;LOC_Os01g42294;LOC_Os01g45700;LOC_Os09g28500;LOC_Os03g21730;LOC_Os10g38800;LOC_Os04g38810;LOC_Os05g33690;LOC_Os06g43044;LOC_Os02g40260;LOC_Os08g39590;LOC_Os02g58390;LOC_Os11g07912;LOC_Os07g32680;LOC_Os06g07220;LOC_Os09g04710;LOC_Os01g48940;LOC_Os11g42450;LOC_Os01g61570;LOC_Os03g18630;LOC_Os03g27120;LOC_Os03g…
GO:0009628	response to abiotic stimulus	Biological Process	82	1	0.00586667	LOC_Os04g52260;LOC_Os03g45760;LOC_Os02g55250;LOC_Os06g50950;LOC_Os02g43640;LOC_Os11g13670;LOC_Os01g39330;LOC_Os01g48446;LOC_Os12g12934;LOC_Os03g63580;LOC_Os03g18030;LOC_Os04g49360;LOC_Os08g10310;LOC_Os06g49100;LOC_Os01g53880;LOC_Os05g27780;LOC_Os01g63540;LOC_Os01g72700;LOC_Os03g21710;LOC_Os02g43280;LOC_Os02g50690;LOC_Os05g03920;LOC_Os03g05530;LOC_Os12g17570;LOC_Os05g46750;LOC_Os06g27910;LOC_Os04g…
GO:0051640	organelle localization	Biological Process	3	1	0.00607082	LOC_Os09g28500;LOC_Os01g41990;LOC_Os06g46950
GO:0030643	cellular phosphate ion homeostasis	Biological Process	3	1	0.00607082	LOC_Os02g31030;LOC_Os03g13540;LOC_Os04g32320
GO:0035445	borate transmembrane transport	Biological Process	3	1	0.00607082	LOC_Os12g37840;LOC_Os01g08020;LOC_Os10g36924
GO:0015810	aspartate transport	Biological Process	5	1	0.0064063	LOC_Os04g41350;LOC_Os12g08090;LOC_Os02g01210;LOC_Os04g56470;LOC_Os12g09300
GO:0006644	phospholipid metabolic process	Biological Process	5	1	0.0064063	LOC_Os07g05110;LOC_Os01g47580;LOC_Os06g46350;LOC_Os03g57080;LOC_Os03g15460
GO:0015827	tryptophan transport	Biological Process	5	1	0.0064063	LOC_Os12g08090;LOC_Os04g41350;LOC_Os12g09300;LOC_Os04g56470;LOC_Os02g01210
GO:0031408	oxylipin biosynthetic process	Biological Process	12	1	0.00661905	LOC_Os08g39840;LOC_Os06g14810;LOC_Os02g49680;LOC_Os01g27230;LOC_Os02g15750;LOC_Os07g42420;LOC_Os08g37180;LOC_Os06g39750;LOC_Os04g43200;LOC_Os08g39850;LOC_Os02g10120;LOC_Os01g34560
GO:0009615	response to virus	Biological Process	12	1	0.00661905	LOC_Os04g59370;LOC_Os01g60340;LOC_Os03g16920;LOC_Os03g14050;LOC_Os03g11910;LOC_Os02g50330;LOC_Os06g47600;LOC_Os10g05600;LOC_Os05g38530;LOC_Os04g45810;LOC_Os12g43490;LOC_Os11g37950
GO:0006807	nitrogen compound metabolic process	Biological Process	28	1	0.00671721	LOC_Os05g27010;LOC_Os07g02200;LOC_Os10g39850;LOC_Os06g10420;LOC_Os03g45210;LOC_Os04g47170;LOC_Os02g07110;LOC_Os08g01940;LOC_Os02g05940;LOC_Os10g05750;LOC_Os11g43760;LOC_Os12g01370;LOC_Os06g13210;LOC_Os10g40600;LOC_Os08g17160;LOC_Os05g34010;LOC_Os08g31030;LOC_Os01g71170;LOC_Os10g28120;LOC_Os07g05190;LOC_Os05g12630;LOC_Os07g30620;LOC_Os11g31380;LOC_Os06g48560;LOC_Os09g19930;LOC_Os02g05970;LOC_Os12g…
GO:0060416	response to growth hormone	Biological Process	7	1	0.00724938	LOC_Os10g38360;LOC_Os10g38710;LOC_Os01g49710;LOC_Os10g38780;LOC_Os10g38470;LOC_Os10g38730;LOC_Os01g49720
GO:0010476	gibberellin mediated signaling pathway	Biological Process	4	1	0.00742953	LOC_Os09g28280;LOC_Os03g15270;LOC_Os12g04150;LOC_Os08g43430
GO:0046148	pigment biosynthetic process	Biological Process	14	1	0.00743581	LOC_Os03g04530;LOC_Os01g53330;LOC_Os07g31960;LOC_Os09g34214;LOC_Os01g53430;LOC_Os02g44654;LOC_Os04g49210;LOC_Os05g45100;LOC_Os10g33370;LOC_Os04g46990;LOC_Os01g39330;LOC_Os06g03930;LOC_Os01g63540;LOC_Os05g45090
GO:1901696	cannabinoid biosynthetic process	Biological Process	2	1	0.00749921	LOC_Os11g05290;LOC_Os01g33160
GO:0090355	positive regulation of auxin metabolic process	Biological Process	5	1	0.00767787	LOC_Os03g05530;LOC_Os12g33300;LOC_Os06g01972;LOC_Os01g36580;LOC_Os02g52930
GO:0090358	positive regulation of tryptophan metabolic process	Biological Process	5	1	0.00767787	LOC_Os01g36580;LOC_Os02g52930;LOC_Os12g33300;LOC_Os06g01972;LOC_Os03g05530
GO:0015692	lead ion transport	Biological Process	6	1	0.00784185	LOC_Os08g43120;LOC_Os07g15370;LOC_Os11g37700;LOC_Os09g16449;LOC_Os01g08260;LOC_Os02g21340
GO:0010026	trichome differentiation	Biological Process	8	1	0.00792292	LOC_Os04g44500;LOC_Os01g43230;LOC_Os02g42430;LOC_Os02g53530;LOC_Os07g40300;LOC_Os12g29400;LOC_Os12g10670;LOC_Os04g39610
GO:0045491	xylan metabolic process	Biological Process	19	1	0.00794179	LOC_Os07g09050;LOC_Os04g38780;LOC_Os11g43980;LOC_Os01g63180;LOC_Os05g41990;LOC_Os11g29780;LOC_Os06g45580;LOC_Os07g01110;LOC_Os10g17960;LOC_Os07g48370;LOC_Os03g18110;LOC_Os05g25350;LOC_Os05g28830;LOC_Os04g30040;LOC_Os07g35004;LOC_Os07g35750;LOC_Os07g35140;LOC_Os02g28074;LOC_Os08g24790
GO:0019752	carboxylic acid metabolic process	Biological Process	16	1	0.00818381	LOC_Os06g01966;LOC_Os01g05840;LOC_Os05g45100;LOC_Os12g36100;LOC_Os01g50410;LOC_Os05g45090;LOC_Os10g39740;LOC_Os03g45194;LOC_Os09g25770;LOC_Os01g53330;LOC_Os11g38870;LOC_Os08g34720;LOC_Os07g39820;LOC_Os01g50400;LOC_Os03g04220;LOC_Os01g50370
GO:0007267	cell-cell signaling	Biological Process	14	1	0.00845465	LOC_Os03g02040;LOC_Os08g07890;LOC_Os05g33890;LOC_Os06g16300;LOC_Os01g49200;LOC_Os08g34380;LOC_Os01g25540;LOC_Os02g57840;LOC_Os09g19930;LOC_Os02g50330;LOC_Os01g25560;LOC_Os03g50970;LOC_Os01g68598;LOC_Os08g31030
GO:0048608	reproductive structure development	Biological Process	46	1	0.00871101	LOC_Os04g51040;LOC_Os07g35560;LOC_Os08g39240;LOC_Os07g32680;LOC_Os04g29680;LOC_Os10g33370;LOC_Os01g62190;LOC_Os01g06310;LOC_Os03g19600;LOC_Os07g06860;LOC_Os03g14130;LOC_Os04g20680;LOC_Os08g03180;LOC_Os11g02610;LOC_Os08g34320;LOC_Os07g01340;LOC_Os07g25810;LOC_Os12g39400;LOC_Os10g01570;LOC_Os07g35480;LOC_Os07g44850;LOC_Os10g07556;LOC_Os09g11440;LOC_Os08g14700;LOC_Os01g53880;LOC_Os06g28670;LOC_Os03g…
GO:2000070	regulation of response to water deprivation	Biological Process	3	1	0.0087639	LOC_Os08g31580;LOC_Os05g49700;LOC_Os03g09170
GO:0051973	positive regulation of telomerase activity	Biological Process	3	1	0.0087639	LOC_Os07g01180;LOC_Os04g40630;LOC_Os01g66890
GO:0009555	pollen development	Biological Process	47	1	0.00885064	LOC_Os08g44360;LOC_Os12g04980;LOC_Os02g06150;LOC_Os05g51670;LOC_Os02g51890;LOC_Os04g51610;LOC_Os05g12630;LOC_Os08g42350;LOC_Os03g04530;LOC_Os02g10120;LOC_Os07g04040;LOC_Os02g07870;LOC_Os06g21230;LOC_Os08g36440;LOC_Os04g38600;LOC_Os04g52390;LOC_Os03g11540;LOC_Os08g03020;LOC_Os02g05970;LOC_Os08g40170;LOC_Os01g20780;LOC_Os09g27580;LOC_Os12g40860;LOC_Os01g66890;LOC_Os06g45580;LOC_Os02g30910;LOC_Os12g…
GO:0051453	regulation of intracellular pH	Biological Process	5	1	0.00911478	LOC_Os03g05530;LOC_Os02g52930;LOC_Os01g36580;LOC_Os06g01972;LOC_Os12g33300
GO:0042546	cell wall biogenesis	Biological Process	15	1	0.00914216	LOC_Os03g20120;LOC_Os05g25350;LOC_Os05g51670;LOC_Os05g28830;LOC_Os01g67360;LOC_Os03g01800;LOC_Os03g13570;LOC_Os01g10320;LOC_Os11g38860;LOC_Os07g09050;LOC_Os04g38780;LOC_Os02g51060;LOC_Os08g24750;LOC_Os10g02770;LOC_Os11g29780
GO:1901928	cadinene biosynthetic process	Biological Process	4	1	0.00932957	LOC_Os08g04500;LOC_Os03g24760;LOC_Os03g22620;LOC_Os04g27670
GO:0019745	pentacyclic triterpenoid biosynthetic process	Biological Process	10	1	0.00938965	LOC_Os09g16449;LOC_Os11g18366;LOC_Os08g43120;LOC_Os05g12040;LOC_Os11g37700;LOC_Os01g08260;LOC_Os02g21340;LOC_Os02g04760;LOC_Os01g60340;LOC_Os01g11340
GO:0006733	oxidoreduction coenzyme metabolic process	Biological Process	11	1	0.00957573	LOC_Os01g34560;LOC_Os02g10120;LOC_Os07g42420;LOC_Os06g39750;LOC_Os02g49480;LOC_Os08g39850;LOC_Os01g06640;LOC_Os11g42510;LOC_Os06g14810;LOC_Os08g39840;LOC_Os02g15750
GO:0040029	regulation of gene expression, epigenetic	Biological Process	22	1	0.00957839	LOC_Os08g14700;LOC_Os04g53860;LOC_Os04g17100;LOC_Os09g08720;LOC_Os06g21230;LOC_Os03g39020;LOC_Os01g33040;LOC_Os01g50420;LOC_Os12g35350;LOC_Os09g31522;LOC_Os07g35480;LOC_Os02g51890;LOC_Os01g20780;LOC_Os03g54910;LOC_Os03g17760;LOC_Os01g50410;LOC_Os02g40900;LOC_Os02g56540;LOC_Os06g11730;LOC_Os07g35520;LOC_Os07g40940;LOC_Os07g35560
GO:0009684	indoleacetic acid biosynthetic process	Biological Process	19	1	0.00968598	LOC_Os06g36670;LOC_Os11g42510;LOC_Os04g02050;LOC_Os07g02120;LOC_Os07g48060;LOC_Os02g16500;LOC_Os03g18600;LOC_Os07g02100;LOC_Os04g08350;LOC_Os06g23684;LOC_Os09g32670;LOC_Os10g02040;LOC_Os02g49480;LOC_Os01g06640;LOC_Os10g38470;LOC_Os03g06520;LOC_Os03g09940;LOC_Os01g12490;LOC_Os10g38360
GO:0009605	response to external stimulus	Biological Process	20	1	0.00985631	LOC_Os10g32580;LOC_Os03g13570;LOC_Os03g02750;LOC_Os04g49210;LOC_Os03g55350;LOC_Os06g11330;LOC_Os02g46910;LOC_Os03g56950;LOC_Os05g33690;LOC_Os10g25450;LOC_Os02g53840;LOC_Os09g16950;LOC_Os07g05190;LOC_Os02g10520;LOC_Os04g48416;LOC_Os10g02770;LOC_Os03g58350;LOC_Os05g07820;LOC_Os11g12530;LOC_Os09g26920
GO:0009851	auxin biosynthetic process	Biological Process	6	1	0.010305	LOC_Os07g17970;LOC_Os04g47300;LOC_Os03g57720;LOC_Os10g42800;LOC_Os07g02140;LOC_Os01g67540
GO:0010043	response to zinc ion	Biological Process	26	1	0.0105501	LOC_Os06g21230;LOC_Os02g08440;LOC_Os01g17214;LOC_Os09g08720;LOC_Os09g31522;LOC_Os01g03710;LOC_Os02g51890;LOC_Os07g01180;LOC_Os03g19427;LOC_Os02g47790;LOC_Os06g11730;LOC_Os03g17760;LOC_Os12g01530;LOC_Os07g18230;LOC_Os08g38460;LOC_Os06g21250;LOC_Os04g52310;LOC_Os04g53860;LOC_Os01g20780;LOC_Os11g04060;LOC_Os11g01530;LOC_Os03g04250;LOC_Os04g46560;LOC_Os02g40900;LOC_Os03g19420;LOC_Os02g02460
GO:0009631	cold acclimation	Biological Process	13	1	0.0106144	LOC_Os06g11730;LOC_Os03g55850;LOC_Os12g07640;LOC_Os03g17760;LOC_Os04g48930;LOC_Os03g60570;LOC_Os02g21090;LOC_Os07g42420;LOC_Os02g51890;LOC_Os02g21009;LOC_Os06g03670;LOC_Os06g21250;LOC_Os05g49170
GO:0015809	arginine transport	Biological Process	5	1	0.0107267	LOC_Os04g56470;LOC_Os12g09300;LOC_Os02g01210;LOC_Os12g08090;LOC_Os04g41350
GO:0019253	reductive pentose-phosphate cycle	Biological Process	5	1	0.0107267	LOC_Os04g38600;LOC_Os12g19470;LOC_Os06g45710;LOC_Os04g19740;LOC_Os12g17600
GO:0071366	cellular response to indolebutyric acid stimulus	Biological Process	5	1	0.0107267	LOC_Os11g37700;LOC_Os01g08260;LOC_Os02g21340;LOC_Os08g43120;LOC_Os09g16449
GO:0010255	glucose mediated signaling pathway	Biological Process	5	1	0.0107267	LOC_Os08g43600;LOC_Os01g64730;LOC_Os12g40920;LOC_Os02g52780;LOC_Os01g46970
GO:0080171	lytic vacuole organization	Biological Process	5	1	0.0107267	LOC_Os01g36580;LOC_Os02g52930;LOC_Os12g33300;LOC_Os06g01972;LOC_Os03g05530
GO:0043090	amino acid import	Biological Process	24	1	0.0107999	LOC_Os05g04600;LOC_Os12g08090;LOC_Os12g33300;LOC_Os03g05530;LOC_Os04g51610;LOC_Os05g39240;LOC_Os01g36580;LOC_Os11g37260;LOC_Os04g54930;LOC_Os04g59120;LOC_Os06g01966;LOC_Os04g47420;LOC_Os03g52650;LOC_Os02g01210;LOC_Os08g38400;LOC_Os06g01972;LOC_Os04g56470;LOC_Os02g46680;LOC_Os04g47300;LOC_Os02g52930;LOC_Os03g54000;LOC_Os12g09300;LOC_Os04g40410;LOC_Os05g10670
GO:0048440	carpel development	Biological Process	14	1	0.0108214	LOC_Os11g03370;LOC_Os04g54930;LOC_Os03g42630;LOC_Os02g46680;LOC_Os02g50040;LOC_Os02g53530;LOC_Os02g54820;LOC_Os02g50330;LOC_Os03g11600;LOC_Os07g49390;LOC_Os01g06640;LOC_Os03g21030;LOC_Os07g40300;LOC_Os05g04600
GO:0006406	mRNA export from nucleus	Biological Process	15	1	0.010877	LOC_Os06g21250;LOC_Os06g40150;LOC_Os08g36920;LOC_Os06g11730;LOC_Os03g17760;LOC_Os09g31522;LOC_Os09g39910;LOC_Os02g51890;LOC_Os12g07030;LOC_Os03g09170;LOC_Os09g28440;LOC_Os06g21230;LOC_Os01g11350;LOC_Os04g53860;LOC_Os09g08720
GO:0043447	alkane biosynthetic process	Biological Process	4	1	0.0115196	LOC_Os10g33250;LOC_Os02g56920;LOC_Os06g44300;LOC_Os02g29640
GO:0045487	gibberellin catabolic process	Biological Process	4	1	0.0115196	LOC_Os01g22910;LOC_Os01g55240;LOC_Os07g48330;LOC_Os03g21400
GO:0031047	gene silencing by RNA	Biological Process	18	1	0.0115243	LOC_Os03g51240;LOC_Os03g12140;LOC_Os10g07290;LOC_Os08g06550;LOC_Os01g52160;LOC_Os03g11540;LOC_Os09g36280;LOC_Os03g26870;LOC_Os01g41200;LOC_Os05g50490;LOC_Os08g44360;LOC_Os09g28580;LOC_Os12g04980;LOC_Os07g32390;LOC_Os02g50330;LOC_Os02g45170;LOC_Os01g74146;LOC_Os03g02290
GO:0071396	cellular response to lipid	Biological Process	8	1	0.0118204	LOC_Os07g02120;LOC_Os03g03570;LOC_Os04g48760;LOC_Os05g07820;LOC_Os07g02100;LOC_Os01g55150;LOC_Os11g44430;LOC_Os03g21730
GO:0010182	sugar mediated signaling pathway	Biological Process	21	1	0.0118866	LOC_Os11g32100;LOC_Os08g39830;LOC_Os08g36920;LOC_Os03g40100;LOC_Os06g40150;LOC_Os07g48630;LOC_Os06g50900;LOC_Os04g40630;LOC_Os01g10320;LOC_Os05g44210;LOC_Os09g38310;LOC_Os12g37400;LOC_Os04g10010;LOC_Os04g32110;LOC_Os09g28440;LOC_Os02g54820;LOC_Os03g43670;LOC_Os03g09170;LOC_Os01g66890;LOC_Os12g07030;LOC_Os04g43200
GO:0006855	drug transmembrane transport	Biological Process	11	1	0.0119341	LOC_Os04g48290;LOC_Os08g43120;LOC_Os08g37432;LOC_Os11g37700;LOC_Os09g16449;LOC_Os03g42830;LOC_Os10g20470;LOC_Os09g35600;LOC_Os02g21340;LOC_Os01g08260;LOC_Os09g37600
GO:0044264	cellular polysaccharide metabolic process	Biological Process	3	1	0.0120505	LOC_Os01g70970;LOC_Os04g59320;LOC_Os11g29780
GO:0033506	glucosinolate biosynthetic process from homomethionine	Biological Process	3	1	0.0120505	LOC_Os07g02100;LOC_Os07g02140;LOC_Os07g02120
GO:0019374	galactolipid metabolic process	Biological Process	3	1	0.0120505	LOC_Os03g57080;LOC_Os06g46350;LOC_Os07g05110
GO:0048583	regulation of response to stimulus	Biological Process	13	1	0.0128104	LOC_Os01g50370;LOC_Os07g06860;LOC_Os01g09580;LOC_Os01g50410;LOC_Os03g56950;LOC_Os01g50400;LOC_Os03g15270;LOC_Os02g34970;LOC_Os01g50420;LOC_Os05g46760;LOC_Os08g32060;LOC_Os09g21120;LOC_Os07g44850
GO:0016036	cellular response to phosphate starvation	Biological Process	30	1	0.0133146	LOC_Os01g06640;LOC_Os03g14420;LOC_Os10g38470;LOC_Os02g56510;LOC_Os01g20860;LOC_Os01g60600;LOC_Os09g25100;LOC_Os03g15050;LOC_Os12g06060;LOC_Os06g29790;LOC_Os04g10690;LOC_Os02g43560;LOC_Os08g33710;LOC_Os02g31030;LOC_Os10g38780;LOC_Os04g43710;LOC_Os11g05410;LOC_Os03g13540;LOC_Os01g49720;LOC_Os01g52230;LOC_Os07g48760;LOC_Os09g25090;LOC_Os10g38710;LOC_Os03g63580;LOC_Os03g44810;LOC_Os01g09100;LOC_Os04g…
GO:0000162	tryptophan biosynthetic process	Biological Process	10	1	0.0138929	LOC_Os05g04820;LOC_Os02g36890;LOC_Os02g41510;LOC_Os12g07640;LOC_Os07g37210;LOC_Os12g03150;LOC_Os11g03440;LOC_Os01g51260;LOC_Os12g33070;LOC_Os08g33660
GO:0006355	regulation of transcription, DNA-templated	Biological Process	154	1	0.0139597	LOC_Os09g28440;LOC_Os04g46220;LOC_Os01g36220;LOC_Os06g41060;LOC_Os04g23550;LOC_Os06g32650;LOC_Os06g11330;LOC_Os07g28890;LOC_Os08g43600;LOC_Os10g40810;LOC_Os04g45810;LOC_Os06g03670;LOC_Os08g31580;LOC_Os01g32770;LOC_Os09g37710;LOC_Os05g49420;LOC_Os01g72330;LOC_Os03g53340;LOC_Os08g42470;LOC_Os10g05600;LOC_Os03g58350;LOC_Os06g43860;LOC_Os05g42180;LOC_Os01g54890;LOC_Os12g39220;LOC_Os01g13520;LOC_Os02g…
GO:0044036	cell wall macromolecule metabolic process	Biological Process	18	1	0.0139599	LOC_Os01g10320;LOC_Os01g11810;LOC_Os08g01530;LOC_Os07g02200;LOC_Os03g45210;LOC_Os03g39020;LOC_Os01g42294;LOC_Os09g30120;LOC_Os03g20120;LOC_Os03g42630;LOC_Os01g60330;LOC_Os12g36890;LOC_Os05g40200;LOC_Os02g50040;LOC_Os10g34230;LOC_Os01g71310;LOC_Os01g04230;LOC_Os12g24020
GO:0051259	protein oligomerization	Biological Process	4	1	0.0140141	LOC_Os01g04370;LOC_Os01g04380;LOC_Os01g04360;LOC_Os04g36750
GO:0009831	plant-type cell wall modification involved in multidimensional cell growth	Biological Process	7	1	0.0142217	LOC_Os06g41700;LOC_Os01g60770;LOC_Os02g44108;LOC_Os06g50400;LOC_Os03g21820;LOC_Os02g51040;LOC_Os05g39990
GO:0010260	organ senescence	Biological Process	12	1	0.0142339	LOC_Os01g70930;LOC_Os10g40960;LOC_Os11g02300;LOC_Os03g08460;LOC_Os08g36920;LOC_Os03g44150;LOC_Os09g28440;LOC_Os07g42510;LOC_Os12g07030;LOC_Os04g46220;LOC_Os02g52670;LOC_Os05g41780
GO:0048439	flower morphogenesis	Biological Process	14	1	0.0144737	LOC_Os06g16300;LOC_Os08g34380;LOC_Os01g49200;LOC_Os08g07890;LOC_Os02g41460;LOC_Os05g33890;LOC_Os03g47730;LOC_Os08g05290;LOC_Os11g02610;LOC_Os01g10320;LOC_Os11g42800;LOC_Os03g50970;LOC_Os01g66890;LOC_Os02g45170
GO:1902247	geranylgeranyl diphosphate catabolic process	Biological Process	2	1	0.0144924	LOC_Os02g17780;LOC_Os04g09900
GO:0030418	nicotianamine biosynthetic process	Biological Process	2	1	0.0144924	LOC_Os03g19420;LOC_Os03g19427
GO:0050830	defense response to Gram-positive bacterium	Biological Process	2	1	0.0144924	LOC_Os05g40010;LOC_Os08g35760
GO:0033306	phytol metabolic process	Biological Process	2	1	0.0144924	LOC_Os01g25990;LOC_Os09g33530
GO:1902243	copal-8-ol diphosphate(3-) biosynthetic process	Biological Process	2	1	0.0144924	LOC_Os04g09900;LOC_Os02g17780
GO:0019593	mannitol biosynthetic process	Biological Process	5	1	0.0145121	LOC_Os07g10840;LOC_Os12g02200;LOC_Os06g07600;LOC_Os09g25090;LOC_Os01g10890
GO:0030048	actin filament-based movement	Biological Process	11	1	0.0147106	LOC_Os11g07680;LOC_Os12g41110;LOC_Os05g19670;LOC_Os01g33080;LOC_Os01g72290;LOC_Os04g39610;LOC_Os03g38170;LOC_Os01g18170;LOC_Os11g07830;LOC_Os03g44880;LOC_Os04g33740
GO:0043201	response to leucine	Biological Process	7	1	0.0157325	LOC_Os10g02100;LOC_Os03g60850;LOC_Os05g34010;LOC_Os10g40600;LOC_Os05g27010;LOC_Os02g46460;LOC_Os06g49220
GO:0080148	negative regulation of response to water deprivation	Biological Process	7	1	0.0157325	LOC_Os10g38780;LOC_Os10g38470;LOC_Os10g38730;LOC_Os01g49720;LOC_Os10g38360;LOC_Os01g49710;LOC_Os10g38710
GO:0080052	response to histidine	Biological Process	7	1	0.0157325	LOC_Os05g34010;LOC_Os05g27010;LOC_Os10g40600;LOC_Os06g49220;LOC_Os02g46460;LOC_Os10g02100;LOC_Os03g60850
GO:0080053	response to phenylalanine	Biological Process	7	1	0.0157325	LOC_Os03g60850;LOC_Os10g02100;LOC_Os06g49220;LOC_Os02g46460;LOC_Os05g27010;LOC_Os10g40600;LOC_Os05g34010
GO:0019222	regulation of metabolic process	Biological Process	15	1	0.0159295	LOC_Os01g15039;LOC_Os07g48510;LOC_Os01g57854;LOC_Os01g72700;LOC_Os06g09340;LOC_Os01g33950;LOC_Os11g36160;LOC_Os03g03570;LOC_Os10g38800;LOC_Os04g46560;LOC_Os02g06150;LOC_Os04g32980;LOC_Os03g21000;LOC_Os02g54190;LOC_Os12g39320
GO:0048832	specification of organ number	Biological Process	3	1	0.01595	LOC_Os03g49050;LOC_Os10g33900;LOC_Os03g01880
GO:0010507	negative regulation of autophagy	Biological Process	3	1	0.01595	LOC_Os08g36440;LOC_Os01g52780;LOC_Os11g30500
GO:0046713	borate transport	Biological Process	3	1	0.01595	LOC_Os01g08020;LOC_Os12g37840;LOC_Os06g12310
GO:0010083	regulation of vegetative meristem growth	Biological Process	3	1	0.01595	LOC_Os10g33900;LOC_Os03g01880;LOC_Os03g49050
GO:0009864	induced systemic resistance, jasmonic acid mediated signaling pathway	Biological Process	10	1	0.0160864	LOC_Os05g25260;LOC_Os02g43820;LOC_Os08g36920;LOC_Os07g42510;LOC_Os02g52670;LOC_Os04g46220;LOC_Os12g07030;LOC_Os09g28440;LOC_Os01g54890;LOC_Os03g21710
GO:0080147	root hair cell development	Biological Process	9	1	0.0160879	LOC_Os04g08350;LOC_Os08g41320;LOC_Os02g55250;LOC_Os01g71320;LOC_Os02g49480;LOC_Os01g06640;LOC_Os03g51910;LOC_Os03g56950;LOC_Os08g42470
GO:0051260	protein homooligomerization	Biological Process	5	1	0.0167023	LOC_Os01g04360;LOC_Os01g04380;LOC_Os01g04370;LOC_Os03g16030;LOC_Os03g15960
GO:0009639	response to red or far red light	Biological Process	18	1	0.0167821	LOC_Os05g34854;LOC_Os07g33620;LOC_Os08g39830;LOC_Os10g33370;LOC_Os01g42960;LOC_Os01g55150;LOC_Os07g48630;LOC_Os12g24800;LOC_Os07g28890;LOC_Os03g47730;LOC_Os02g51750;LOC_Os02g29640;LOC_Os01g22910;LOC_Os05g11990;LOC_Os03g63970;LOC_Os11g05320;LOC_Os06g02019;LOC_Os09g39910
GO:0022607	cellular component assembly	Biological Process	6	1	0.0167894	LOC_Os01g42070;LOC_Os05g46750;LOC_Os05g46760;LOC_Os03g39020;LOC_Os01g50420;LOC_Os01g50370
[truncated: 1,236 more rows]
