# Supplementary material for: OsJAZ1 Attenuates Drought Resistance by Regulating JA and ABA Signaling in Rice
Source: Front Plant Sci. 2017 Dec 11;8:2108. doi: 10.3389/fpls.2017.02108 (PMC5733117; doi:10.3389/fpls.2017.02108)
Supplement: Supplementary file 5 [file Data_Sheet_3.xlsx]

## Sheet: Sheet 1, All DEGs of ZH11
Supplementary File 3. All drought stress-responsive genes in ZH11. Sheet 1, The list of all DEGs in ZH11. Sheet 2, GO enrichment of all DEGs in ZH11
MSU Locus	ZH11_D_mean	ZH11_N_mean	log2FC	FDR	regulated
LOC_Os01g01430	3.29948	1.15567	1.5135	0.0035543	up
LOC_Os01g01620	190.289	46.0364	2.04735	1.98238e-74	up
LOC_Os01g02020	15.4841	7.81102	0.987205	1.49554e-10	up
LOC_Os01g03130	6.77582	3.18779	1.08784	0.042188	up
LOC_Os01g03310	86.8409	35.9087	1.27404	1.26102e-05	up
LOC_Os01g03340	5.43386	0.448846	3.59769	0.000302564	up
LOC_Os01g03390	80.5961	10.3935	2.95502	2.53933e-14	up
LOC_Os01g03914	18.5088	7.07581	1.38724	2.43109e-18	up
LOC_Os01g04050	43.5924	16.3061	1.41867	0.00197045	up
LOC_Os01g04330	150.197	19.3785	2.95433	0.0129428	up
LOC_Os01g04360	39.1457	1.99402	4.2951	3.55934e-13	up
LOC_Os01g04370	224.781	4.93819	5.50839	1.17861e-06	up
LOC_Os01g04380	54.6003	4.7753	3.51524	0.000172283	up
LOC_Os01g04590	25.2003	8.77194	1.52247	5.4452e-05	up
LOC_Os01g05830	15.4275	6.15501	1.32567	7.34725e-14	up
LOC_Os01g06310	156.288	24.5985	2.66757	4.21969e-07	up
LOC_Os01g06640	13.1634	5.54192	1.24807	2.53582e-06	up
LOC_Os01g06740	7.07454	2.07421	1.77008	6.12309e-09	up
LOC_Os01g07130	2.20614	0.865836	1.34936	0.000891277	up
LOC_Os01g07300	16.5242	6.65683	1.31167	0.000189729	up
LOC_Os01g07376	20.2833	10.0387	1.01473	3.49688e-06	up
LOC_Os01g08780	5.33626	2.14609	1.31412	0.000112642	up
LOC_Os01g08860	553.63	118.344	2.22593	0.000101158	up
LOC_Os01g09460	1.16376	0.479935	1.27788	0.00829354	up
LOC_Os01g09640	96.9738	23.241	2.06092	2.05803e-67	up
LOC_Os01g10320	25.682	2.62401	3.29091	7.60944e-51	up
LOC_Os01g10370	3.73222	0.0369958	6.65653	1.49671e-09	up
LOC_Os01g10890	13.0013	5.63372	1.20649	2.49605e-06	up
LOC_Os01g11150	5.51984	1.53577	1.84567	0.00862635	up
LOC_Os01g11590	398.238	14.0517	4.82481	3.9163e-18	up
LOC_Os01g12470	8.89303	4.26071	1.06158	5.82614e-05	up
LOC_Os01g12490	3.04148	1.25624	1.27566	0.000629693	up
LOC_Os01g12520	59.438	18.3332	1.69693	3.1043e-13	up
LOC_Os01g12580	4.7755	1.18088	2.01579	2.49682e-05	up
LOC_Os01g12660	4.71717	0.772848	2.60967	5.51753e-05	up
LOC_Os01g13280	6.54655	2.87251	1.18842	7.19179e-06	up
LOC_Os01g13930	10.9111	1.55677	2.80918	8.42662e-15	up
LOC_Os01g14050	37.7419	15.8408	1.25252	8.8465e-27	up
LOC_Os01g15000	42.8139	12.2356	1.807	7.7251e-44	up
LOC_Os01g15270	3355.06	482.198	2.79864	4.96242e-18	up
LOC_Os01g15650	0.574539	0.0992162	2.53376	2.5326e-06	up
LOC_Os01g16310	5.30716	0.989704	2.42287	2.72503e-13	up
LOC_Os01g16360	1.24906	0.61327	1.02625	0.00240402	up
LOC_Os01g16920	3.4638	0.414238	3.06382	0.000171816	up
LOC_Os01g18160	16.861	4.6661	1.8534	6.43852e-06	up
LOC_Os01g18220	20.5094	4.4572	2.20208	1.40036e-10	up
LOC_Os01g18230	11.4564	2.48675	2.20381	1.21902e-05	up
LOC_Os01g18860	1.42112	0.450356	1.65789	0.0317468	up
LOC_Os01g19130	45.7137	21.9065	1.06126	0.00308083	up
LOC_Os01g19770	5.55886	0.463944	3.58277	0.0323697	up
LOC_Os01g20030	2.73266	0.672067	2.02363	0.000338183	up
LOC_Os01g20206	15.642	5.86296	1.41573	0.00869981	up
LOC_Os01g20860	6.56836	2.82066	1.2195	1.2058e-14	up
LOC_Os01g21250	224.101	50.584	2.1474	0.000296876	up
LOC_Os01g21420	85.7016	26.8036	1.67689	7.05134e-33	up
LOC_Os01g24710	48.5743	19.71	1.30127	2.80702e-15	up
LOC_Os01g24720	4.28106	2.06861	1.04931	0.0138027	up
LOC_Os01g24820	0.546803	0.0574218	3.25135	2.06474e-06	up
LOC_Os01g25990	67.0031	20.3472	1.7194	6.60958e-54	up
LOC_Os01g27140	4.17271	1.08544	1.9427	0.00202218	up
LOC_Os01g27449	8.40441	1.14898	2.8708	1.01082e-10	up
LOC_Os01g28840	4.17803	0.580692	2.84698	1.89359e-10	up
LOC_Os01g32330	372.087	172.94	1.10537	3.69021e-11	up
LOC_Os01g32780	98.0145	17.1569	2.51421	6.95925e-18	up
LOC_Os01g36240	15.7478	8.30725	0.922705	0.00141581	up
LOC_Os01g36790	2.75026	0.721425	1.93065	2.50553e-09	up
LOC_Os01g37810	6.56131	2.08423	1.65447	0.0253372	up
LOC_Os01g40094	205.532	43.7285	2.23272	1.16565e-77	up
LOC_Os01g40190	7.70712	2.57708	1.58046	1.16958e-07	up
LOC_Os01g40280	18.1498	3.99629	2.18322	4.65727e-27	up
LOC_Os01g41720	2.14493	0.579786	1.88734	7.57456e-06	up
LOC_Os01g41890	2.32828	1.1424	1.02719	0.00167567	up
LOC_Os01g42090	28.2841	10.6198	1.41323	2.09402e-07	up
LOC_Os01g42190	222.572	91.0921	1.28888	8.22714e-26	up
LOC_Os01g42410	4.75618	1.93353	1.29856	1.05317e-12	up
LOC_Os01g42690	2.64643	1.19248	1.15008	0.0302324	up
LOC_Os01g42860	34.5782	6.67152	2.37377	2.16801e-12	up
LOC_Os01g43740	9.08993	3.16953	1.52	1.16621e-08	up
LOC_Os01g44250	5.71101	1.68333	1.76242	9.87757e-08	up
LOC_Os01g45090	2.83669	0.723919	1.97031	0.00348099	up
LOC_Os01g45110	1.9955	0.739211	1.43269	0.025137	up
LOC_Os01g45460	4.10154	1.30667	1.65027	2.80556e-08	up
LOC_Os01g45640	242.067	57.258	2.07986	2.90418e-17	up
LOC_Os01g45659	5.65088	0.135659	5.38042	3.11784e-09	up
LOC_Os01g46080	26.6698	13.1245	1.02295	2.01669e-11	up
LOC_Os01g46250	3.41487	1.5512	1.13845	0.0255324	up
LOC_Os01g46760	47.2851	20.5037	1.2055	2.70885e-10	up
LOC_Os01g46970	20.4396	4.07362	2.32699	2.59289e-39	up
LOC_Os01g47256	127.902	109.99	0.217655	3.10762e-16	up
LOC_Os01g47490	126.544	40.0477	1.65985	2.83428e-16	up
LOC_Os01g47690	62.7097	25.3652	1.30584	6.06029e-23	up
LOC_Os01g47760	140.151	40.3893	1.79494	0.0348491	up
LOC_Os01g48940	3.66998	0.901291	2.02571	0.0182995	up
LOC_Os01g48950	23.2527	9.66819	1.26608	0.000141579	up
LOC_Os01g49280	3.83677	1.37725	1.47811	1.62502e-05	up
LOC_Os01g49710	23.2496	3.61814	2.68388	5.82911e-15	up
LOC_Os01g49720	138.008	18.5148	2.898	1.25565e-77	up
LOC_Os01g50370	4.64093	1.00492	2.20733	7.42067e-07	up
LOC_Os01g50400	22.8706	0.360978	5.98544	3.53311e-18	up
LOC_Os01g50450	62.1321	29.3209	1.08341	6.75321e-15	up
LOC_Os01g50890	12.7805	6.6516	0.942174	1.017e-05	up
LOC_Os01g50900	5.45188	0.37963	3.84409	6.48296e-06	up
LOC_Os01g50910	142.944	1.26357	6.8218	1.85581e-16	up
LOC_Os01g51030	15.6661	5.21323	1.58739	0.000392737	up
LOC_Os01g51400	2.03785	0.780996	1.38366	0.0318868	up
LOC_Os01g51420	23.0822	11.6971	0.980635	2.29034e-15	up
LOC_Os01g52110	218.577	85.8108	1.34891	1.26525e-30	up
LOC_Os01g52230	39.8043	8.99561	2.14563	9.10467e-18	up
LOC_Os01g52260	12.355	4.59117	1.42816	4.89169e-05	up
LOC_Os01g52730	2.7664	0.9512	1.54019	2.58095e-06	up
LOC_Os01g52740	11.8729	1.41659	3.06717	1.00621e-27	up
LOC_Os01g52830	1.21467	0.0300862	5.33532	0.00896774	up
LOC_Os01g53090	5.06928	1.12851	2.16736	0.0222351	up
LOC_Os01g53170	0.453408	0.289844	0.645534	0.013879	up
LOC_Os01g53820	1.81604	0.961332	0.917689	3.44135e-09	up
LOC_Os01g53880	18.6095	3.0829	2.59368	5.41137e-35	up
LOC_Os01g54030	1.61076	0.12869	3.64577	0.0162773	up
LOC_Os01g54340	41.1445	12.8328	1.68087	0.000536442	up
LOC_Os01g55240	14.2224	5.98165	1.24956	0.000465225	up
LOC_Os01g55940	11.2535	4.82334	1.22227	2.59428e-05	up
LOC_Os01g56560	51.9157	23.2569	1.15851	1.22288e-09	up
LOC_Os01g56690	6.00107	0.0282582	7.73041	0.0109571	up
LOC_Os01g57420	37.9944	12.7975	1.56993	8.98789e-08	up
LOC_Os01g57450	11.7442	3.86408	1.60376	1.44506e-08	up
LOC_Os01g57740	39.2208	17.7179	1.14641	1.72835e-15	up
LOC_Os01g57854	6.81118	2.35546	1.53189	0.00038777	up
LOC_Os01g58194	33.7373	6.28432	2.42452	1.80788e-33	up
LOC_Os01g58620	42.7996	16.2282	1.39909	5.96321e-10	up
LOC_Os01g58640	18.2839	3.6825	2.31182	4.881e-37	up
LOC_Os01g58850	6.0721	0.168749	5.16924	6.72614e-06	up
LOC_Os01g60110	8.54975	4.04347	1.08029	5.85375e-05	up
LOC_Os01g61610	2.76058	0.449553	2.61841	1.67115e-05	up
LOC_Os01g61680	31.9224	11.0547	1.52991	2.5259e-05	up
LOC_Os01g61700	28.5073	6.49387	2.13418	2.26257e-15	up
LOC_Os01g62060	40.575	16.8929	1.26417	8.99255e-09	up
LOC_Os01g62190	5.57783	1.63555	1.76993	0.00357395	up
LOC_Os01g62490	108.639	15.2676	2.83099	3.42071e-56	up
LOC_Os01g62600	13.4807	0.247851	5.76527	4.98793e-42	up
LOC_Os01g62760	468.702	89.2638	2.39252	1.15928e-96	up
LOC_Os01g62900	3.99368	1.93601	1.04464	0.00447549	up
LOC_Os01g62970	10.8514	3.41002	1.67003	2.85549e-09	up
LOC_Os01g62980	103.086	25.7502	2.00119	2.50629e-43	up
LOC_Os01g63230	21.1	9.1928	1.19867	0.00119959	up
LOC_Os01g63930	7.721	2.88455	1.42044	5.7828e-06	up
LOC_Os01g64360	57.7942	6.29698	3.19819	2.41409e-23	up
LOC_Os01g64730	60.2296	16.1926	1.89514	1.55673e-49	up
LOC_Os01g64750	14.9988	7.16797	1.06521	1.88248e-12	up
LOC_Os01g65370	42.6048	19.974	1.09289	0.00101124	up
LOC_Os01g66650	1.37704	0.55161	1.31985	0.0250248	up
LOC_Os01g67540	63.165	7.32725	3.10778	8.18857e-80	up
LOC_Os01g68290	349.332	2.71378	7.00815	5.89078e-57	up
LOC_Os01g68540	1.69722	0.493105	1.78321	0.00402117	up
LOC_Os01g68650	55.3475	2.49458	4.47165	9.57725e-37	up
LOC_Os01g68960	12.1806	5.79031	1.07287	0.0388308	up
LOC_Os01g69100	246.963	90.0844	1.45494	4.51602e-40	up
LOC_Os01g70500	4.76392	1.53784	1.63125	0.00352393	up
LOC_Os01g70730	13.0593	5.9286	1.13932	0.00337088	up
LOC_Os01g71624	30.0157	9.18482	1.7084	1.15902e-17	up
LOC_Os01g72210	2.96041	1.05582	1.48743	2.63389e-07	up
LOC_Os01g72460	25.1174	7.627	1.7195	1.05081e-09	up
LOC_Os01g72900	9.53124	3.35377	1.50688	0.00207626	up
LOC_Os01g73110	16.2742	1.14398	3.83045	1.19389e-27	up
LOC_Os01g74450	894.733	353.575	1.33944	7.08786e-11	up
LOC_Os02g01590	59.3458	2.5141	4.56103	9.11566e-23	up
LOC_Os02g04369	26.1973	6.73158	1.9604	2.37237e-11	up
LOC_Os02g04380	0.256137	0.0909516	1.49374	0.040134	up
LOC_Os02g04640	26.9208	9.06449	1.57042	7.81001e-34	up
LOC_Os02g04755	5.75704	1.41919	2.02026	5.93032e-09	up
LOC_Os02g04760	18.2062	3.60048	2.33817	4.21684e-72	up
LOC_Os02g04780	11.7634	2.60622	2.17427	1.91469e-12	up
LOC_Os02g06520	40.8895	21.5365	0.924948	7.42784e-13	up
LOC_Os02g07730	6.46423	2.81072	1.20154	0.00463141	up
LOC_Os02g07930	26.6512	11.9321	1.15935	3.14299e-06	up
LOC_Os02g10120	346.092	96.0112	1.84988	1.69969e-58	up
LOC_Os02g10730	25.7622	12.0199	1.09983	0.00180753	up
LOC_Os02g11870	18.6708	6.87005	1.44239	1.43802e-05	up
LOC_Os02g13620	11.3081	4.66939	1.27605	0.000224869	up
LOC_Os02g13800	22.763	1.1235	4.34063	8.87128e-06	up
LOC_Os02g14280	0.525131	0.254465	1.04521	0.0152532	up
LOC_Os02g14760	50.3724	24.4874	1.0406	5.71016e-15	up
LOC_Os02g14980	10.8358	4.39533	1.30176	5.79117e-12	up
LOC_Os02g15930	8.48318	2.13151	1.99273	4.26649e-06	up
LOC_Os02g22020	1.46144	0.204117	2.83992	0.00113801	up
LOC_Os02g26470	66.2507	9.5734	2.79083	1.106e-06	up
LOC_Os02g26700	220.656	107.287	1.04032	1.28189e-06	up
LOC_Os02g28220	3.93884	0.753298	2.38648	4.18676e-06	up
LOC_Os02g30910	44.9104	7.59172	2.56455	3.00936e-16	up
LOC_Os02g31030	8.99532	2.1598	2.05827	1.41714e-15	up
LOC_Os02g32450	77.6958	14.6521	2.40673	6.6738e-25	up
LOC_Os02g32520	122.825	21.7447	2.49787	4.42199e-05	up
LOC_Os02g32580	340.94	30.5781	3.47895	1.76052e-05	up
LOC_Os02g32860	0.742093	0.348719	1.08953	0.0121601	up
LOC_Os02g33380	110.413	7.7159	3.83893	7.50011e-14	up
LOC_Os02g33560	5.53694	2.74559	1.01197	0.0200011	up
LOC_Os02g34600	75.7613	29.1427	1.37833	3.21888e-30	up
LOC_Os02g34970	3.31068	0.531229	2.63972	1.74664e-08	up
LOC_Os02g35830	61.6414	25.4488	1.2763	1.01976e-14	up
LOC_Os02g36490	18.5266	4.59549	2.01131	1.64589e-10	up
LOC_Os02g37309	8.71644	3.87813	1.16838	0.0251628	up
LOC_Os02g39950	5.77247	2.4005	1.26585	1.40245e-06	up
LOC_Os02g40900	47.9723	15.3255	1.64627	9.34401e-08	up
LOC_Os02g41840	3.1708	0.140173	4.49957	6.86952e-08	up
LOC_Os02g41954	39.4105	3.5728	3.46345	3.02279e-55	up
LOC_Os02g42940	15.4593	6.04339	1.35504	2.42685e-11	up
LOC_Os02g43330	77.6685	0.515806	7.23436	1.43476e-228	up
LOC_Os02g43540	110.639	46.5729	1.2483	6.62885e-17	up
LOC_Os02g43560	1.2595	0.502053	1.32694	0.0358713	up
LOC_Os02g43770	6.14228	0.835489	2.87808	2.05425e-11	up
LOC_Os02g43820	5.28427	1.18294	2.15933	1.15656e-05	up
LOC_Os02g44770	1.24128	0.293813	2.07886	3.89507e-06	up
LOC_Os02g44820	27.9723	7.14574	1.96884	4.15177e-11	up
LOC_Os02g44870	227.702	30.6045	2.89533	4.58497e-65	up
LOC_Os02g44990	0.666449	0.162683	2.03443	0.000650815	up
LOC_Os02g45040	2.96695	0.894571	1.72971	2.21784e-08	up
LOC_Os02g45700	1.73575	0.555155	1.64459	0.000112056	up
LOC_Os02g45930	51.2639	22.6611	1.17772	4.55311e-08	up
LOC_Os02g46210	8.52314	3.35799	1.34379	0.000477215	up
LOC_Os02g46473	42.3507	18.0749	1.2284	0.00127611	up
LOC_Os02g46620	31.4376	12.7231	1.30504	0.0464373	up
LOC_Os02g46690	1.20057	0.5409	1.15028	0.0481997	up
LOC_Os02g47320	26.9186	11.2131	1.26341	6.0312e-10	up
LOC_Os02g47330	1.68737	0.90017	0.906507	0.0013456	up
LOC_Os02g47840	28.1925	8.94236	1.65658	1.15656e-05	up
LOC_Os02g48170	8.30139	3.94358	1.07385	0.00523517	up
LOC_Os02g48630	26.4637	12.3507	1.09941	1.09072e-12	up
LOC_Os02g49860	14.7127	3.86187	1.92969	1.56499e-10	up
LOC_Os02g49986	6.25271	1.47766	2.08117	1.06206e-06	up
LOC_Os02g50340	2.35401	1.20296	0.968536	0.0286843	up
LOC_Os02g50350	39.9452	15.0756	1.40581	1.06276e-10	up
LOC_Os02g50690	3.67592	1.62606	1.17673	0.017659	up
LOC_Os02g51110	10.8187	4.75041	1.18741	0.000410193	up
LOC_Os02g51750	41.9291	9.28137	2.17554	4.97602e-05	up
LOC_Os02g51890	3.31824	0.811384	2.03196	1.32357e-10	up
LOC_Os02g51930	14.0939	5.77539	1.28709	1.49366e-05	up
LOC_Os02g52150	82.4561	19.8173	2.05687	0.049678	up
LOC_Os02g52210	59.1582	4.23883	3.80284	0.0010533	up
LOC_Os02g52780	110.072	17.9661	2.6151	8.12152e-103	up
LOC_Os02g53320	20.3285	5.78382	1.8134	5.89931e-05	up
LOC_Os02g53410	26.426	8.82171	1.58283	7.56981e-06	up
LOC_Os02g54140	125.133	28.2124	2.14906	0.00957855	up
LOC_Os02g54254	21.209	7.45022	1.50932	3.75807e-36	up
LOC_Os02g54820	62.0272	19.3149	1.68319	4.4844e-18	up
LOC_Os02g55134	75.6582	25.0272	1.596	1.02831e-17	up
LOC_Os02g55890	1.06535	0.481891	1.14455	0.0244618	up
LOC_Os02g56120	2.68055	0.439553	2.60842	1.75319e-05	up
LOC_Os02g56900	288.603	103.912	1.47372	2.81086e-36	up
LOC_Os02g57280	136.619	33.9941	2.00681	6.47884e-35	up
LOC_Os02g57840	42.8421	1.57405	4.76648	6.15988e-112	up
LOC_Os03g01330	3.34165	1.04902	1.67151	7.57395e-06	up
LOC_Os03g01820	16.3571	7.58428	1.10883	0.00046719	up
LOC_Os03g01880	12.835	5.09379	1.33328	1.53249e-07	up
LOC_Os03g02050	27.6372	2.15317	3.68208	0.00364964	up
LOC_Os03g02260	31.1382	15.7359	0.984623	0.00737283	up
LOC_Os03g02390	56.5854	27.0171	1.06656	6.34379e-10	up
LOC_Os03g03370	54.1247	9.51688	2.50773	1.04813e-33	up
LOC_Os03g03510	27.6254	13.9126	0.989598	0.00014637	up
LOC_Os03g03810	105.712	8.92182	3.56665	3.6269e-19	up
LOC_Os03g03980	6.44852	2.39755	1.42741	4.78063e-05	up
LOC_Os03g04130	7.82952	1.52168	2.36326	3.18482e-15	up
LOC_Os03g04770	152.875	32.7803	2.22145	1.42155e-24	up
LOC_Os03g05280	24.8492	10.6944	1.21635	1.22335e-13	up
LOC_Os03g05310	81.6287	32.5758	1.32528	4.44979e-29	up
LOC_Os03g05840	3.38685	1.68707	1.00542	0.042188	up
LOC_Os03g05900	5.85158	1.94572	1.58852	3.50989e-06	up
LOC_Os03g06250	7.63605	1.96196	1.96053	1.04287e-07	up
LOC_Os03g06360	28.6687	8.13687	1.81693	0.045638	up
LOC_Os03g06520	259.353	79.6367	1.70341	4.68497e-13	up
LOC_Os03g07180	11.9241	0.249717	5.57744	5.99183e-07	up
LOC_Os03g07200	43.5818	13.8454	1.65432	5.60063e-17	up
LOC_Os03g08520	11.3528	0.763483	3.89431	0.0159851	up
LOC_Os03g08540	2.00891	0.640583	1.64896	0.000160841	up
LOC_Os03g08550	45.4579	20.5622	1.14454	1.25955e-15	up
LOC_Os03g08560	1.36154	0.653703	1.05853	0.00855264	up
LOC_Os03g08700	3.56606	1.80844	0.979587	1.84273e-05	up
LOC_Os03g08970	47.3074	22.3376	1.08259	0.0377973	up
LOC_Os03g09170	21.974	1.28526	4.09567	0.00525217	up
LOC_Os03g10080	16.6763	7.21721	1.20829	8.87047e-12	up
LOC_Os03g10320	74.5941	6.28725	3.56856	3.70892e-74	up
LOC_Os03g10478	2.24861	0.900146	1.3208	0.0250993	up
LOC_Os03g10620	128.602	55.9662	1.20028	3.3395e-19	up
LOC_Os03g11550	13.4817	6.10301	1.14341	4.83995e-07	up
LOC_Os03g11910	11.0924	3.06556	1.85534	0.000610364	up
LOC_Os03g12820	20.3543	4.04885	2.32975	2.72544e-22	up
LOC_Os03g12860	28.8587	7.71752	1.9028	5.14655e-15	up
LOC_Os03g13540	153.596	36.4668	2.07448	5.63912e-80	up
LOC_Os03g13710	0.380879	0.0693025	2.45835	1.03253e-05	up
LOC_Os03g13810	24.4196	11.3105	1.11038	0.00082457	up
LOC_Os03g14050	102.291	26.3214	1.95837	4.11287e-06	up
LOC_Os03g14180	92.5263	10.2974	3.16759	8.90977e-06	up
LOC_Os03g14258	2.87808	0.713716	2.01168	0.0290326	up
LOC_Os03g14370	47.1639	20.8056	1.18071	0.0143102	up
LOC_Os03g14420	3.87845	1.77023	1.13154	0.0215049	up
LOC_Os03g15270	17.8907	2.30109	2.95882	2.98152e-19	up
LOC_Os03g15890	158.55	72.1236	1.1364	0.00020157	up
LOC_Os03g15960	372.535	51.2017	2.86311	2.33512e-07	up
LOC_Os03g16020	26.8678	3.00491	3.16048	0.000150611	up
LOC_Os03g16030	43.6489	7.65135	2.51216	0.000233525	up
LOC_Os03g16170	153.781	12.8449	3.58161	7.68374e-84	up
LOC_Os03g16334	36.0573	10.8661	1.73045	1.77578e-20	up
LOC_Os03g16600	42.5062	15.6972	1.43716	2.04306e-12	up
LOC_Os03g16610	55.1024	12.1789	2.17773	1.38056e-48	up
LOC_Os03g16670	124.913	34.0678	1.87445	4.82286e-17	up
LOC_Os03g16920	31.8959	2.95192	3.43364	1.48057e-06	up
LOC_Os03g17230	1.4904	0.705156	1.07968	0.0126622	up
LOC_Os03g17790	1324.22	40.9486	5.01519	2.98429e-28	up
LOC_Os03g17800	22.3428	8.46256	1.40065	3.58291e-13	up
LOC_Os03g18030	2.7247	0.76293	1.83647	4.44779e-05	up
LOC_Os03g18490	7.07678	0.470299	3.91144	1.10551e-06	up
LOC_Os03g18680	51.8932	19.0399	1.44652	4.25946e-17	up
LOC_Os03g18850	73.9451	31.1665	1.24646	5.13948e-12	up
LOC_Os03g19270	14.6519	5.2981	1.46754	3.95783e-06	up
LOC_Os03g19290	441.254	23.0449	4.25909	4.2673e-65	up
LOC_Os03g19400	33.6686	15.6319	1.10691	0.0277653	up
LOC_Os03g20090	13.5822	3.46003	1.97287	1.91479e-10	up
LOC_Os03g20120	199.601	42.4358	2.23377	0.000343079	up
LOC_Os03g20550	14.2525	6.94396	1.03739	0.000234746	up
LOC_Os03g20680	8.46393	0.043888	7.59136	5.97025e-07	up
LOC_Os03g20730	85.0371	37.6446	1.17565	0.000155343	up
LOC_Os03g20870	24.2514	9.39648	1.36788	3.04593e-08	up
LOC_Os03g21030	81.2761	27.4983	1.56349	0.0196091	up
LOC_Os03g21060	33.3777	15.0243	1.15159	6.22286e-11	up
LOC_Os03g21260	0.406272	0.0684483	2.56936	0.0211341	up
LOC_Os03g21640	9.83281	2.92072	1.75128	0.025881	up
LOC_Os03g22120	39.395	12.1935	1.69191	1.32445e-46	up
LOC_Os03g22270	660.015	312.501	1.07864	1.14129e-21	up
LOC_Os03g22620	9.98412	1.53388	2.70245	1.22321e-56	up
LOC_Os03g22680	21.6784	5.82617	1.89564	1.66147e-14	up
LOC_Os03g22790	87.9378	16.7831	2.38947	1.46807e-46	up
LOC_Os03g24070	1.81733	0.670764	1.43795	0.047009	up
LOC_Os03g24820	1.80641	0.174482	3.37197	6.89268e-07	up
LOC_Os03g26490	29.9964	4.66088	2.68611	3.96687e-13	up
LOC_Os03g26870	41.7709	7.77072	2.42638	1.21473e-67	up
LOC_Os03g27110	8.70975	0.473752	4.20043	6.59759e-23	up
LOC_Os03g28300	51.6414	23.8844	1.11246	1.50628e-23	up
LOC_Os03g30300	2.82621	1.23672	1.19235	3.86762e-06	up
LOC_Os03g35640	2.54665	0.587957	2.11482	4.00406e-08	up
LOC_Os03g36279	0.557174	0.116086	2.26293	2.56407e-06	up
LOC_Os03g37770	7.66095	0	#DIV/0!	2.18782e-08	up
LOC_Os03g37840	24.9506	10.5244	1.24533	1.23374e-18	up
LOC_Os03g41060	61.7216	12.6726	2.28407	0.00030053	up
LOC_Os03g41390	7.80946	2.51089	1.63703	0.000271076	up
LOC_Os03g42520	0.92647	0.0119081	6.28173	0.000181549	up
LOC_Os03g42600	60.8768	24.4972	1.31327	1.08027e-05	up
LOC_Os03g42760	2.36892	1.14644	1.04707	0.0141457	up
LOC_Os03g42830	14.6691	3.60887	2.02316	5.11097e-16	up
LOC_Os03g43720	9.52166	1.77006	2.42742	7.11897e-23	up
LOC_Os03g43750	1.92616	0.288821	2.73748	1.72809e-07	up
LOC_Os03g44150	38.6958	13.1983	1.55182	1.33657e-34	up
LOC_Os03g44380	29.6298	1.32633	4.48154	3.01269e-84	up
LOC_Os03g44810	2.22509	0.735055	1.59794	2.97098e-06	up
LOC_Os03g45194	69.0397	23.2805	1.5683	8.56938e-38	up
LOC_Os03g45210	6.02877	0.383724	3.97372	4.5946e-17	up
LOC_Os03g45280	30.5633	5.57239	2.45544	3.83443e-36	up
LOC_Os03g46060	15.3702	6.99631	1.13547	0.00867574	up
LOC_Os03g46420	4.2248	1.75633	1.26632	0.00898911	up
LOC_Os03g48000	28.3237	12.6557	1.16222	1.94364e-18	up
LOC_Os03g48310	14.0849	2.63698	2.41719	1.00396e-59	up
LOC_Os03g48710	90.1055	27.8729	1.69275	1.94749e-19	up
LOC_Os03g48780	42.7167	3.1521	3.76041	1.60252e-41	up
LOC_Os03g48970	147.401	73.4977	1.00398	3.13014e-20	up
LOC_Os03g49430	26.4319	5.16477	2.3555	0.00629028	up
LOC_Os03g49440	53.2244	22.8475	1.22005	2.24809e-09	up
LOC_Os03g50180	0.225475	0.0609729	1.88673	0.0155158	up
LOC_Os03g50470	3.02248	1.09636	1.46301	3.98449e-06	up
LOC_Os03g50960	84.4904	16.1783	2.38473	1.97407e-27	up
LOC_Os03g51010	13.747	5.79879	1.2453	0.0214307	up
LOC_Os03g51240	10.8932	3.38974	1.68418	1.87662e-06	up
LOC_Os03g51350	17.0375	0.418955	5.34577	1.56499e-10	up
LOC_Os03g51459	27.586	11.9471	1.20728	8.3798e-06	up
LOC_Os03g51479	12.57	6.27585	1.0021	1.69051e-05	up
LOC_Os03g52370	6.36318	2.48937	1.35397	0.031892	up
LOC_Os03g53340	2.37022	0.569347	2.05764	3.77788e-06	up
LOC_Os03g53400	12.2966	5.23087	1.23313	0.00369835	up
LOC_Os03g53540	5.30265	1.4794	1.8417	0.00188106	up
LOC_Os03g53910	75.0014	32.1759	1.22094	0.00164939	up
LOC_Os03g54930	0.927538	0.309582	1.58309	0.00141807	up
LOC_Os03g55034	4.07026	0.952663	2.09508	0.00925474	up
LOC_Os03g55320	73.4396	29.4454	1.31852	0.0246453	up
LOC_Os03g55380	8.43262	3.54421	1.25051	2.56407e-06	up
LOC_Os03g55660	365.798	137.744	1.40905	5.96298e-37	up
LOC_Os03g55850	387.733	122.063	1.66744	3.73153e-14	up
LOC_Os03g57880	16.2815	5.62117	1.53429	2.01503e-07	up
LOC_Os03g58020	48.5324	21.4791	1.17601	0.000486726	up
LOC_Os03g58170	24.0176	10.0868	1.25162	7.42348e-06	up
LOC_Os03g59040	15.4488	6.88824	1.16529	3.60464e-13	up
LOC_Os03g59320	101.029	44.521	1.1822	2.85672e-21	up
LOC_Os03g59360	299.958	98.2121	1.61079	8.77715e-26	up
LOC_Os03g59460	1.47973	0.0808537	4.19388	5.9295e-11	up
LOC_Os03g59480	6.62815	3.3339	0.991395	4.42528e-08	up
LOC_Os03g60080	502.16	99.4758	2.33573	0.0481541	up
LOC_Os03g60260	6.3727	1.09201	2.54492	7.07423e-07	up
LOC_Os03g60370	19.4359	8.73262	1.15424	3.15068e-14	up
LOC_Os03g60560	35.8984	1.37913	4.70209	1.85057e-47	up
LOC_Os03g60580	370.075	59.2464	2.64302	3.73613e-14	up
LOC_Os03g60780	30.8535	15.1955	1.02179	8.38978e-12	up
LOC_Os03g60840	10.6829	3.83541	1.47786	2.94457e-05	up
LOC_Os03g61150	170.902	31.5432	2.43777	5.62795e-05	up
LOC_Os03g61160	10.6215	0.0854457	6.95777	0.0224053	up
LOC_Os03g61360	3.186	1.28061	1.31491	0.0491277	up
LOC_Os03g61920	13.713	6.24332	1.13516	8.68117e-08	up
LOC_Os03g63580	6.80639	1.38977	2.29204	1.77735e-07	up
LOC_Os03g63940	243.756	89.8624	1.43965	7.98857e-27	up
LOC_Os04g01740	30.7277	1.67433	4.19789	0.000169648	up
LOC_Os04g02350	0.264842	0.0251249	3.39794	9.34972e-05	up
LOC_Os04g02650	7.22747	1.35439	2.41585	4.65511e-09	up
LOC_Os04g09570	4.32862	1.81849	1.25117	0.0164417	up
LOC_Os04g10690	9.41253	0.823693	3.51441	7.16205e-18	up
LOC_Os04g12499	8.80846	3.87463	1.18483	9.75264e-07	up
LOC_Os04g14690	7.91124	3.17943	1.31514	5.6661e-07	up
LOC_Os04g17100	330.218	82.628	1.99872	4.22194e-59	up
LOC_Os04g19740	6.73964	1.82235	1.88687	2.64519e-18	up
LOC_Os04g20400	7.25199	2.8616	1.34155	0.000111753	up
LOC_Os04g20749	4.79545	0.15064	4.99249	5.03208e-21	up
LOC_Os04g24804	16.4081	0.771173	4.41121	1.35023e-30	up
LOC_Os04g25440	35.3598	12.7946	1.46658	2.81474e-10	up
LOC_Os04g27190	16.6078	3.9903	2.05729	9.73676e-07	up
LOC_Os04g27670	18.994	1.95365	3.2813	3.45786e-11	up
LOC_Os04g27810	24.6673	11.6875	1.07763	0.0125083	up
LOC_Os04g28420	77.3773	25.9354	1.57699	6.23937e-21	up
LOC_Os04g28570	0.361193	0.102444	1.81794	0.00108033	up
LOC_Os04g31710	7.37207	0.199275	5.20924	0.000166076	up
LOC_Os04g32110	80.8388	37.2916	1.1162	1.09816e-13	up
LOC_Os04g32320	2.85107	0.129042	4.46559	4.37649e-11	up
LOC_Os04g32980	24.9233	10.8336	1.20198	1.80932e-10	up
LOC_Os04g33820	10.7519	2.88453	1.89818	0.000931689	up
LOC_Os04g33920	40.2114	0.277666	7.17811	5.88506e-36	up
LOC_Os04g34610	344.352	76.3204	2.17374	1.43184e-26	up
LOC_Os04g35100	47.5974	4.63313	3.36082	1.03139e-35	up
LOC_Os04g35500	4.49907	2.00156	1.1685	0.040763	up
LOC_Os04g36600	115.343	34.4978	1.74135	6.53205e-19	up
LOC_Os04g36750	13.4631	0.335886	5.32489	2.79726e-05	up
LOC_Os04g37710	145.792	66.2515	1.13789	0.0193014	up
LOC_Os04g37880	13.7928	3.65929	1.91428	1.26303e-05	up
LOC_Os04g38780	0.591371	0.290513	1.02546	0.00289754	up
LOC_Os04g39980	17.3799	6.25506	1.47432	9.27533e-08	up
LOC_Os04g40070	1.41447	0.230615	2.6167	1.85208e-15	up
LOC_Os04g40590	3.96915	1.4128	1.49027	0.0456052	up
LOC_Os04g40700	15.2934	7.53141	1.02192	2.06982e-06	up
LOC_Os04g40990	57.1784	6.34014	3.17288	2.61316e-63	up
LOC_Os04g41620	83.7713	29.4213	1.50959	0.0026436	up
LOC_Os04g41640	1567.38	581.072	1.43156	0.000289211	up
LOC_Os04g42950	4.78423	1.01088	2.24267	8.54518e-09	up
LOC_Os04g43200	100.646	4.12378	4.60918	6.58723e-67	up
LOC_Os04g43390	184.786	57.8909	1.67445	6.23015e-49	up
LOC_Os04g43710	45.8982	12.1212	1.92091	2.74664e-16	up
LOC_Os04g44500	54.801	11.2038	2.29022	4.31896e-07	up
LOC_Os04g44830	76.7574	34.8349	1.13977	6.99457e-15	up
LOC_Os04g45810	179.589	23.9936	2.90398	2.20079e-11	up
LOC_Os04g47140	115.581	27.9736	2.04677	1.2585e-20	up
LOC_Os04g48070	5.38415	1.27738	2.07554	2.83428e-16	up
LOC_Os04g48270	31.5958	8.53664	1.88799	2.7812e-32	up
LOC_Os04g49360	3.40729	0.644932	2.40141	4.72321e-05	up
LOC_Os04g49370	1.98077	0.479422	2.0467	0.000185599	up
LOC_Os04g49980	25.8009	1.46499	4.13845	5.2141e-11	up
LOC_Os04g51130	2.4041	0.754348	1.67219	3.38784e-07	up
LOC_Os04g51160	18.161	7.48977	1.27785	0.00547618	up
LOC_Os04g51410	62.074	28.1821	1.13921	2.60862e-10	up
LOC_Os04g51610	72.5475	17.6908	2.03593	2.63933e-78	up
LOC_Os04g51660	4.06248	0.793758	2.35559	0.000244424	up
LOC_Os04g51796	1.73902	0.00871194	7.64106	1.76438e-21	up
LOC_Os04g51820	8.69342	1.79979	2.27209	5.42788e-27	up
LOC_Os04g52110	4.668	0.0550841	6.40503	0.00556381	up
LOC_Os04g52390	20.7549	10.379	0.999785	6.39638e-16	up
LOC_Os04g53750	2.32167	0.942699	1.3003	5.70683e-05	up
LOC_Os04g53990	6.01567	2.12672	1.5001	1.40328e-06	up
LOC_Os04g54210	387.307	51.0097	2.92463	1.12825e-16	up
LOC_Os04g55200	9.52164	2.41013	1.9821	2.97462e-10	up
LOC_Os04g55850	41.8816	16.7102	1.32559	1.91596e-15	up
LOC_Os04g55950	11.1721	1.74294	2.68031	0.000129912	up
LOC_Os04g56309	4.33842	0.183182	4.56582	0.000632368	up
LOC_Os04g57440	23.8512	11.5215	1.04974	7.68187e-13	up
LOC_Os04g57550	54.7465	23.212	1.2379	2.53947e-06	up
LOC_Os04g58030	3.18151	0.931723	1.77174	1.87804e-05	up
LOC_Os04g58280	114.414	36.0843	1.66482	1.42773e-37	up
LOC_Os04g58710	90.2086	20.7439	2.12058	9.21857e-07	up
LOC_Os04g58890	79.8749	30.1698	1.40464	1.6727e-05	up
LOC_Os04g59190	13.4058	5.22157	1.3603	6.72043e-05	up
LOC_Os04g59540	8.11372	1.49234	2.44279	5.19155e-12	up
LOC_Os05g02390	2.71952	0.378548	2.8448	0.004305	up
LOC_Os05g02770	66.4935	30.6767	1.11607	7.97932e-09	up
LOC_Os05g03130	37.7794	0.953187	5.3087	3.64891e-10	up
LOC_Os05g03920	14.0478	0.955412	3.87808	1.86808e-50	up
LOC_Os05g04700	567.46	163.403	1.79608	5.05309e-58	up
LOC_Os05g04710	2.27545	0.850901	1.41909	0.00064205	up
LOC_Os05g05930	23.5569	0	#DIV/0!	7.87557e-18	up
LOC_Os05g06399	41.998	5.5304	2.92486	1.77947e-28	up
LOC_Os05g07090	20.1301	8.05531	1.32135	7.50851e-20	up
LOC_Os05g07810	7.36982	0.97899	2.91226	3.94949e-10	up
LOC_Os05g07890	50.8945	5.99534	3.0856	5.13812e-06	up
LOC_Os05g10670	91.7862	20.9222	2.13324	1.8781e-08	up
LOC_Os05g10690	39.8187	15.2045	1.38895	2.03661e-14	up
LOC_Os05g12040	12.748	0.7563	4.07517	6.81465e-30	up
LOC_Os05g12630	36.3101	6.64891	2.44918	4.20283e-18	up
LOC_Os05g15530	4.92212	1.27102	1.95329	9.01143e-05	up
LOC_Os05g15770	18.8154	3.84486	2.29091	0.000286666	up
LOC_Os05g16980	0.648191	0.291661	1.15213	0.0141256	up
LOC_Os05g18470	39.8612	16.6453	1.25987	7.60711e-06	up
LOC_Os05g20440	1.53288	0.689015	1.15364	0.000252168	up
LOC_Os05g20460	1.36419	0.649808	1.06996	0.00763236	up
LOC_Os05g20560	0.43934	0.111829	1.97404	0.0403942	up
LOC_Os05g23440	13.4835	4.83142	1.48067	1.65382e-12	up
LOC_Os05g25040	1.53615	0.160364	3.2599	1.54908e-08	up
LOC_Os05g25260	46.6397	20.3506	1.19649	3.76063e-15	up
LOC_Os05g26660	3.52239	1.76467	0.997162	0.000422475	up
LOC_Os05g27060	0.162663	0.0552346	1.55824	0.00907251	up
LOC_Os05g27780	230.925	37.262	2.63165	1.91663e-36	up
LOC_Os05g28740	985.823	23.8503	5.36925	0	up
LOC_Os05g28830	7.55202	2.64222	1.51511	2.30099e-07	up
LOC_Os05g31020	56.6688	3.11363	4.18588	5.92475e-61	up
LOC_Os05g31670	38.5189	0.179347	7.74666	3.49688e-06	up
LOC_Os05g32474	1.63731	0.781702	1.06664	0.0327021	up
LOC_Os05g33130	2.18482	0.602198	1.85921	0.0240221	up
LOC_Os05g33310	56.9602	22.761	1.32339	9.49966e-22	up
LOC_Os05g34070	321.803	158.543	1.02131	9.83151e-07	up
LOC_Os05g34830	128.885	30.1344	2.09661	0.00637679	up
LOC_Os05g37060	4.06264	0.261828	3.95573	7.48585e-09	up
LOC_Os05g37700	18.7895	6.91485	1.44215	1.36937e-29	up
LOC_Os05g38150	21.9157	10.8571	1.01333	1.01724e-16	up
LOC_Os05g38260	30.7919	12.7289	1.27444	7.8434e-10	up
LOC_Os05g38280	0.895386	0.0682632	3.71333	0.00471151	up
LOC_Os05g38290	158.028	7.65638	4.36737	3.20814e-56	up
LOC_Os05g38530	172.167	47.0761	1.87074	0.000812335	up
LOC_Os05g38660	53.7246	16.4183	1.71028	4.04135e-09	up
LOC_Os05g38860	6.77746	1.62432	2.06091	1.98411e-05	up
LOC_Os05g39250	181.803	5.5775	5.02661	1.23507e-30	up
LOC_Os05g41490	101.214	4.74011	4.41634	1.3097e-105	up
LOC_Os05g41620	13.5603	6.14437	1.14205	0.000386875	up
LOC_Os05g42070	10.8623	2.64783	2.03645	0.000132526	up
LOC_Os05g42200	5.37312	2.20449	1.28532	2.21217e-08	up
LOC_Os05g42210	8.72023	3.39591	1.36057	6.5154e-14	up
LOC_Os05g43390	4.1339	1.74882	1.24112	2.57921e-05	up
LOC_Os05g43910	21.2481	10.2777	1.04781	2.63841e-09	up
LOC_Os05g44030	2.86839	0.445643	2.68628	0.000996291	up
LOC_Os05g44060	18.5044	2.57381	2.84589	0.000692423	up
LOC_Os05g44340	14.6746	2.10627	2.80055	0.00674157	up
LOC_Os05g44900	43.2902	3.47835	3.63757	0.0459114	up
LOC_Os05g45090	5.44408	1.82802	1.57441	5.31717e-05	up
LOC_Os05g45100	1.56088	0.43377	1.84735	0.0138662	up
LOC_Os05g45110	1.13567	0.122147	3.21685	0.0100665	up
LOC_Os05g45140	3.70373	1.53512	1.27063	0.000101709	up
LOC_Os05g45350	52.2937	18.7508	1.47969	1.52805e-15	up
LOC_Os05g45450	15.6115	6.75395	1.20881	0.00100342	up
LOC_Os05g46040	145.396	33.5307	2.11644	1.34309e-73	up
LOC_Os05g46350	5.38052	0.813924	2.72478	8.34211e-08	up
LOC_Os05g46480	139.25	1.12283	6.95439	3.40644e-06	up
LOC_Os05g46750	3.28838	0.228911	3.84452	2.19159e-06	up
LOC_Os05g47700	408.276	73.116	2.48129	5.62143e-76	up
LOC_Os05g47730	35.5872	0.260551	7.09365	4.18794e-17	up
LOC_Os05g48140	0.409319	0.223983	0.869835	0.0412501	up
LOC_Os05g48200	17.3906	3.53298	2.29935	1.04632e-71	up
LOC_Os05g48330	12.4781	5.72786	1.12333	0.00125989	up
LOC_Os05g48340	17.8468	4.63351	1.94549	3.85867e-39	up
LOC_Os05g48650	21.0543	3.02252	2.80029	0.000334062	up
LOC_Os05g48810	69.1855	24.2808	1.51065	0.040763	up
LOC_Os05g48840	34.3402	12.1248	1.50193	2.63143e-06	up
LOC_Os05g49170	66.3511	30.3914	1.12646	2.55104e-13	up
LOC_Os05g49300	69.2138	28.2687	1.29185	3.63189e-18	up
LOC_Os05g49350	59.5059	25.9443	1.19762	4.67879e-08	up
LOC_Os05g49420	28.0835	9.2791	1.59767	9.25309e-30	up
LOC_Os05g49440	1.68327	0.0552153	4.93006	0.00594763	up
LOC_Os05g49700	80.4221	10.476	2.94051	7.85606e-42	up
LOC_Os05g49730	47.6579	2.79399	4.09231	4.67078e-54	up
LOC_Os05g49770	33.6844	13.0148	1.37193	1.49463e-29	up
LOC_Os05g49940	183.974	24.948	2.8825	5.28714e-53	up
LOC_Os05g50470	11.3503	4.8742	1.21949	0.00110734	up
LOC_Os05g50490	10.8975	2.90957	1.90512	1.77245e-07	up
LOC_Os05g50850	4.20253	0.786581	2.41759	8.53895e-05	up
LOC_Os05g51630	25.9064	9.02902	1.52067	1.6347e-34	up
LOC_Os05g51670	92.5101	33.9386	1.44668	2.41479e-20	up
LOC_Os06g02040	7.23757	0.0984281	6.20029	4.73213e-08	up
LOC_Os06g03670	6.83241	0.190914	5.1614	1.1692e-09	up
LOC_Os06g04090	34.9177	9.69062	1.8493	5.97945e-30	up
LOC_Os06g04889	51.7197	15.9826	1.69422	1.64508e-14	up
LOC_Os06g04990	2.24543	0.609274	1.88183	0.018299	up
LOC_Os06g05420	14.0139	1.1524	3.60414	9.60816e-17	up
LOC_Os06g07030	47.316	4.85176	3.28575	1.2349e-67	up
LOC_Os06g07220	3.46893	0.214608	4.01471	0.000185204	up
LOC_Os06g07600	26.6061	11.23	1.24441	8.78578e-13	up
LOC_Os06g10210	8.21457	3.21738	1.3523	0.0460485	up
LOC_Os06g10530	47.0648	8.88896	2.40456	1.43112e-14	up
LOC_Os06g11090	8.67818	2.08796	2.0553	1.32275e-10	up
LOC_Os06g11600	7.16076	2.46099	1.54087	1.63722e-12	up
LOC_Os06g11610	21.2872	7.23766	1.55639	0.0188279	up
LOC_Os06g11980	228.956	43.8747	2.3836	3.60126e-83	up
LOC_Os06g12370	4.38097	0.0659801	6.05308	1.46782e-23	up
LOC_Os06g13560	37.7247	14.2963	1.39987	2.4797e-24	up
LOC_Os06g13720	26.6704	0.689329	5.2739	2.71393e-59	up
LOC_Os06g14370	62.469	27.9854	1.15847	1.62472e-14	up
LOC_Os06g14670	29.8552	2.44818	3.6082	1.42773e-37	up
LOC_Os06g15370	8.28397	3.48235	1.25026	9.95264e-05	up
LOC_Os06g16630	4.05638	1.65154	1.29638	0.00360593	up
LOC_Os06g17070	0.596147	0.149733	1.99328	5.72311e-06	up
LOC_Os06g19200	12.4648	5.47844	1.18602	1.49948e-06	up
LOC_Os06g19630	0.607739	0.0381503	3.99369	8.76303e-09	up
LOC_Os06g20310	0.615292	0.272615	1.17441	0.0437384	up
LOC_Os06g21910	5.27857	0.0260569	7.66234	7.7498e-13	up
LOC_Os06g22060	46.7674	11.8915	1.97557	1.63878e-63	up
LOC_Os06g23684	7.6312	2.49051	1.61547	2.07748e-10	up
LOC_Os06g24180	2.31096	0.728879	1.66474	0.00497066	up
LOC_Os06g24190	71.6551	29.8689	1.26243	5.49367e-06	up
LOC_Os06g24490	5.90442	2.53934	1.21734	0.0139127	up
LOC_Os06g24730	154.592	62.2725	1.3118	1.17623e-33	up
LOC_Os06g24990	33.9582	6.97164	2.28419	5.97703e-12	up
LOC_Os06g25010	43.0625	6.24708	2.78518	1.15199e-31	up
LOC_Os06g27910	7.95495	0.634172	3.64891	5.32338e-20	up
LOC_Os06g29180	115.829	52.3767	1.14501	2.15485e-10	up
LOC_Os06g30179	2.47329	1.02965	1.26427	0.00271676	up
LOC_Os06g30370	124.496	4.15944	4.90357	1.97407e-125	up
LOC_Os06g32600	59.6821	18.5502	1.68587	0.00877774	up
LOC_Os06g35960	30.5006	2.74895	3.47189	6.97496e-75	up
LOC_Os06g36390	2.1934	0.879236	1.31885	0.0022692	up
LOC_Os06g37150	3.41037	1.6865	1.01589	0.000278072	up
LOC_Os06g39480	5.9968	1.41568	2.0827	2.28379e-06	up
LOC_Os06g39650	2.5886	1.14653	1.1749	0.0028173	up
LOC_Os06g39875	9.072	3.67814	1.30244	0.000958816	up
LOC_Os06g40080	166.81	78.4656	1.08808	5.75743e-20	up
LOC_Os06g40120	44.6229	21.1282	1.07862	3.9657e-13	up
LOC_Os06g40210	116.606	42.3401	1.46154	3.24589e-06	up
LOC_Os06g43020	6.47735	1.43968	2.16966	2.75895e-10	up
LOC_Os06g43870	80.6041	37.514	1.10342	1.11545e-09	up
LOC_Os06g44160	61.6678	14.3317	2.1053	0.00756979	up
LOC_Os06g44190	611.457	96.6814	2.66094	1.30002e-10	up
LOC_Os06g44260	36.0825	6.09206	2.5663	1.46429e-39	up
LOC_Os06g45710	117.609	21.6585	2.441	1.4613e-21	up
LOC_Os06g46740	45.7586	2.15536	4.40804	4.28876e-05	up
LOC_Os06g46900	39.1699	12.5207	1.64543	6.89205e-05	up
LOC_Os06g46920	23.2005	2.35776	3.29867	2.26414e-34	up
LOC_Os06g47130	4.58333	1.74147	1.39609	2.38398e-06	up
LOC_Os06g48210	4.27268	1.57844	1.43664	0.000118362	up
LOC_Os06g48300	55.4198	5.93178	3.22386	5.82724e-76	up
LOC_Os06g48500	8.20519	1.7513	2.22811	3.23885e-16	up
LOC_Os06g49640	241.447	70.076	1.78472	9.2591e-54	up
LOC_Os06g49660	16.9915	7.10507	1.25789	0.000227979	up
LOC_Os06g50230	46.6384	16.4471	1.50369	1.32634e-14	up
LOC_Os06g51260	39.9374	17.4837	1.19173	0.0245717	up
LOC_Os06g51440	10.2759	1.02948e-06	23.2508	2.75558e-54	up
LOC_Os07g01340	1.07338	0.307878	1.80173	0.0400943	up
LOC_Os07g02850	1.73005	0.337981	2.3558	0.00922017	up
LOC_Os07g04040	1.16285	0.461104	1.3345	0.00616742	up
LOC_Os07g05365	3.95728	0.294036	3.75044	3.9333e-09	up
LOC_Os07g05940	20.9263	0.512339	5.35208	2.45011e-10	up
LOC_Os07g07040	26.8672	7.7708	1.78971	7.30156e-19	up
LOC_Os07g07410	48.8779	12.8602	1.92627	7.25164e-21	up
LOC_Os07g08320	1.64006	0.305159	2.42612	3.97718e-08	up
LOC_Os07g08390	37.0739	16.2104	1.19349	2.39739e-09	up
LOC_Os07g09050	2.31876	0.718781	1.68973	7.72631e-05	up
LOC_Os07g09420	8.63629	3.88613	1.15208	0.00215006	up
LOC_Os07g09670	6.42036	2.65077	1.27624	3.84603e-07	up
LOC_Os07g10840	522.741	19.1824	4.76824	6.59495e-19	up
LOC_Os07g13834	40.8415	18.2163	1.16481	0.000434945	up
LOC_Os07g14600	30.7915	5.02866	2.61428	3.34227e-20	up
LOC_Os07g15959	53.082	4.27881	3.63294	7.26207e-44	up
LOC_Os07g16970	3.94896	1.85261	1.09191	9.62793e-05	up
LOC_Os07g23570	1.91016	0.346764	2.46167	0.0321344	up
LOC_Os07g23660	10.76	4.02486	1.41867	0.00430837	up
LOC_Os07g29330	1.74577	0.53508	1.70604	0.0188498	up
LOC_Os07g31390	9.03812	3.86086	1.2271	0.000222341	up
LOC_Os07g33280	5.6461	1.95513	1.52999	0.000371519	up
LOC_Os07g34520	20.2927	2.57664	2.9774	7.29236e-19	up
LOC_Os07g35140	5.47815	1.96466	1.47941	4.57136e-06	up
LOC_Os07g35480	2.73892	1.0486	1.38514	0.000310609	up
LOC_Os07g35510	2.71752	1.01913	1.41495	0.000175706	up
LOC_Os07g36400	4.4108	2.05607	1.10115	0.000731046	up
LOC_Os07g36710	0.412226	0.184702	1.15824	0.0367244	up
LOC_Os07g37210	4.58383	1.12557	2.0259	0.000505306	up
LOC_Os07g37290	66.467	27.989	1.24778	0.00198244	up
LOC_Os07g37400	1.48334	0.530252	1.4841	0.0358713	up
LOC_Os07g37620	7.47546	2.04604	1.86933	3.30704e-05	up
LOC_Os07g37690	4.57954	1.05411	2.11918	0.000141429	up
LOC_Os07g38170	315.559	124.75	1.33887	0.04703	up
LOC_Os07g38290	20.9179	8.59448	1.28325	4.26994e-05	up
LOC_Os07g39910	0.753036	0.176959	2.08931	0.000971488	up
LOC_Os07g40040	28.4696	11.9297	1.25487	0.0173126	up
LOC_Os07g40290	9.39728	3.14347	1.57988	0.000340963	up
LOC_Os07g40300	2.56954	0.739125	1.79762	0.0176788	up
LOC_Os07g41160	37.0019	11.1499	1.73057	1.34128e-20	up
LOC_Os07g41280	27.0907	12.5715	1.10764	1.93266e-14	up
LOC_Os07g41310	1.95666	0.759712	1.36486	0.0102585	up
LOC_Os07g41320	44.083	7.38451	2.57765	1.49406e-41	up
LOC_Os07g42220	41.9423	18.1647	1.20727	2.30761e-05	up
LOC_Os07g42280	9.04204	2.55133	1.8254	3.83139e-23	up
LOC_Os07g42700	18.4455	8.88407	1.05397	1.02831e-17	up
LOC_Os07g42910	1.38236	0.520207	1.40997	0.049569	up
LOC_Os07g42994	4.46821	2.14267	1.06028	0.0110756	up
LOC_Os07g43950	98.3114	33.3161	1.56114	1.2309e-07	up
LOC_Os07g44410	11.7885	1.78408	2.72413	2.64341e-15	up
LOC_Os07g44850	14.2256	2.00706	2.82533	1.64542e-16	up
LOC_Os07g44950	26.0755	12.8936	1.01604	1.11771e-08	up
LOC_Os07g45000	44.2653	21.9712	1.01056	2.51976e-17	up
LOC_Os07g46990	555.568	247.598	1.16597	2.42585e-05	up
LOC_Os07g47100	21.5003	10.668	1.01106	1.25635e-12	up
LOC_Os07g47400	51.9817	22.9704	1.17823	2.76395e-06	up
LOC_Os07g47590	7.7097	3.42366	1.17114	4.13876e-06	up
LOC_Os07g48120	1.23267	0.291376	2.08083	2.86431e-05	up
LOC_Os07g48160	21.9226	7.57296	1.53349	8.04878e-14	up
LOC_Os07g48229	4.87135	2.36873	1.04021	1.50234e-05	up
LOC_Os07g48450	78.3744	15.3565	2.35154	1.93561e-58	up
LOC_Os07g48460	27.8858	10.9204	1.3525	7.61515e-05	up
LOC_Os07g48510	36.8479	15.5775	1.24212	1.05779e-13	up
LOC_Os07g48630	69.5396	25.8169	1.42952	1.88161e-16	up
LOC_Os07g48680	6.11222	0.547387	3.48106	4.75024e-10	up
LOC_Os07g48830	81.6279	9.99155	3.03028	1.43423e-05	up
LOC_Os07g48870	1.88309	0.768674	1.29266	0.0319814	up
LOC_Os07g49390	24.7656	8.81212	1.49077	3.64378e-18	up
LOC_Os08g01370	68.2793	1.28085	5.73627	0.00200442	up
LOC_Os08g01530	8.81764	2.83841	1.63531	0.000142191	up
LOC_Os08g01890	34.5843	16.465	1.07071	4.29374e-11	up
LOC_Os08g01910	34.2978	3.83722	3.15998	9.80561e-16	up
LOC_Os08g02030	2.56744	0.488541	2.39378	0.000924299	up
LOC_Os08g02070	20.158	8.6311	1.22374	2.2714e-10	up
LOC_Os08g02460	27.7953	13.5516	1.03638	6.75837e-08	up
LOC_Os08g03310	5.03689	2.21542	1.18495	3.85821e-05	up
LOC_Os08g04430	612.02	270.292	1.17906	3.86331e-23	up
LOC_Os08g04560	6.65311	1.08058	2.62222	5.75318e-12	up
LOC_Os08g06010	32.1304	11.2161	1.51837	4.17392e-31	up
LOC_Os08g08440	11.1151	1.78341	2.63981	6.21268e-07	up
LOC_Os08g10500	1117.71	35.772	4.96557	5.24138e-13	up
LOC_Os08g12449	52.2935	17.2777	1.59772	1.06601e-10	up
LOC_Os08g14310	20.9291	6.27733	1.73729	0.000196808	up
LOC_Os08g14350	119.226	50.2032	1.24785	4.16966e-12	up
LOC_Os08g17820	1.11981	0.584429	0.938151	0.000223072	up
LOC_Os08g18974	2.70799	0.00725593	8.54384	1.21214e-24	up
LOC_Os08g19420	6.55123	0.811503	3.0131	1.04984e-20	up
LOC_Os08g23870	5.90244	0.295652	4.31934	0.00258776	up
LOC_Os08g24750	2.10105	0.615055	1.77232	0.00536373	up
LOC_Os08g28710	1.72073	0.19024	3.17712	0.000905262	up
LOC_Os08g29600	63.7804	9.90615	2.68672	1.68391e-19	up
LOC_Os08g30014	3.70771	1.26691	1.54922	0.0192508	up
LOC_Os08g30510	41.3405	9.27002	2.15691	7.0925e-29	up
LOC_Os08g30540	8.94265	0.791242	3.49851	6.7159e-10	up
LOC_Os08g30550	2.35167	0.327345	2.8448	6.97225e-05	up
LOC_Os08g31090	4.50622	1.00886	2.15919	0.000125525	up
LOC_Os08g31100	0.890393	0.381236	1.22376	0.0239423	up
LOC_Os08g31200	4.40545	1.20153	1.87442	0.000928015	up
LOC_Os08g31580	121.632	49.4681	1.29796	3.12175e-26	up
LOC_Os08g31860	101.522	17.6324	2.52549	1.43267e-10	up
LOC_Os08g32060	9.86773	1.44013	2.77652	4.50409e-13	up
LOC_Os08g32980	393.893	114.509	1.78235	2.46447e-16	up
LOC_Os08g33710	278.421	46.4898	2.58228	1.13612e-105	up
LOC_Os08g34390	75.7026	0.461766	7.35704	2.12139e-121	up
LOC_Os08g34500	16.4748	3.48171	2.24239	2.45402e-09	up
LOC_Os08g34580	4.36141	1.64273	1.4087	0.00651612	up
LOC_Os08g35860	62.3061	15.3525	2.0209	9.2889e-35	up
LOC_Os08g36320	56.9982	26.767	1.09046	6.42413e-19	up
LOC_Os08g36330	0.787224	0.398501	0.982191	0.0158126	up
LOC_Os08g36440	11.7217	4.11356	1.51072	2.41501e-05	up
LOC_Os08g36920	23.3569	0.055908	8.70658	0.0467419	up
LOC_Os08g37104	9.51489	3.6285	1.39081	5.50126e-10	up
LOC_Os08g37130	27.1373	12.367	1.13378	5.39192e-06	up
LOC_Os08g37595	6.04541	2.87094	1.07432	0.0349007	up
LOC_Os08g37874	30.4224	9.25416	1.71696	8.15052e-23	up
LOC_Os08g38020	0.998166	0.377953	1.40107	0.039002	up
LOC_Os08g38460	225.467	66.8639	1.75362	1.96973e-34	up
LOC_Os08g39370	263.324	43.1955	2.60789	7.17611e-18	up
LOC_Os08g39730	2.18301	0.524279	2.05791	0.00109012	up
LOC_Os08g40910	27.836	9.40583	1.56532	0.0398291	up
LOC_Os08g43120	0.950036	0.431977	1.13703	0.000619563	up
LOC_Os09g02180	262.173	16.5512	3.98551	5.87777e-06	up
LOC_Os09g03190	3.08397	0.375126	3.03934	1.31886e-14	up
LOC_Os09g03200	33.9528	3.67577	3.20741	1.53496e-10	up
LOC_Os09g09040	21.8487	1.678	3.70273	1.09617e-23	up
LOC_Os09g09650	1.46794	0.420852	1.80241	2.64384e-05	up
LOC_Os09g10620	6.17333	0.118546	5.70253	5.66782e-05	up
LOC_Os09g15670	194.755	10.7094	4.18471	5.73969e-173	up
LOC_Os09g16760	4.05216	1.88797	1.10185	6.4657e-05	up
LOC_Os09g17560	54.0511	5.50186	3.29633	3.00075e-95	up
LOC_Os09g18090	0.875461	0.351643	1.31593	0.00020883	up
LOC_Os09g20930	81.538	23.9431	1.76786	3.42482e-29	up
LOC_Os09g21120	18.5135	0.677042	4.77319	3.8877e-22	up
LOC_Os09g23300	27.5801	9.6805	1.51048	2.85549e-09	up
LOC_Os09g23350	20.4646	8.49091	1.26914	4.06606e-22	up
LOC_Os09g23620	4.71037	1.42775	1.7221	3.04945e-05	up
LOC_Os09g25090	91.776	8.34635	3.4589	1.48178e-97	up
LOC_Os09g25100	13.2032	5.10802	1.37005	0.000192738	up
LOC_Os09g25430	1.07129	0.235506	2.1855	0.0129445	up
LOC_Os09g25690	13.6378	0.436561	4.96528	3.73776e-08	up
LOC_Os09g25700	3.31552	0.112219	4.88484	1.06723e-13	up
LOC_Os09g25770	9.94062	3.94123	1.33469	7.16056e-07	up
LOC_Os09g25810	39.4421	17.3054	1.18851	8.37402e-05	up
LOC_Os09g25980	0.215069	0.0976938	1.13846	0.0170687	up
LOC_Os09g26620	175.459	51.4827	1.76898	2.37841e-53	up
LOC_Os09g26880	76.3627	29.7455	1.3602	5.23947e-34	up
LOC_Os09g26920	5.09326	1.49573	1.76774	2.93632e-06	up
LOC_Os09g27050	59.0189	28.2877	1.061	6.60158e-19	up
LOC_Os09g27060	0.954844	0.405846	1.23433	0.000408743	up
LOC_Os09g27260	7.54009	1.99959	1.91488	5.26618e-06	up
LOC_Os09g27950	9.96779	3.91003	1.35009	0.000421026	up
LOC_Os09g28180	1.43057	0.603905	1.2442	0.00728614	up
LOC_Os09g28210	2.47361	0.394729	2.64768	0.00806072	up
LOC_Os09g28280	20.3862	9.37911	1.12007	0.000201348	up
LOC_Os09g28370	1.10866	0.498395	1.15346	0.0129982	up
LOC_Os09g28500	28.2481	12.5652	1.16872	0.00045021	up
LOC_Os09g28600	98.4109	28.3302	1.79648	6.04481e-32	up
LOC_Os09g30120	22.178	9.71241	1.19123	2.82271e-20	up
LOC_Os09g30490	18.5383	2.58806	2.84056	1.48462e-12	up
LOC_Os09g31130	10.6568	1.98385	2.4254	2.63629e-18	up
LOC_Os09g31200	115.15	28.0691	2.03646	0.00827236	up
LOC_Os09g31522	2.33951	0.793813	1.55934	0.0403223	up
LOC_Os09g32470	30.3747	10.2031	1.57386	2.76626e-13	up
LOC_Os09g32540	2.70232	1.18431	1.19015	7.72917e-07	up
LOC_Os09g33530	43.1861	10.95	1.97964	1.63551e-20	up
LOC_Os09g33820	12.0978	4.5445	1.41256	1.71621e-12	up
LOC_Os09g35790	77.8025	39.9892	0.960205	6.03873e-05	up
LOC_Os09g36200	239.988	103.348	1.21544	3.77718e-23	up
LOC_Os09g37200	1.8912	0.283038	2.74024	0.00194732	up
LOC_Os09g38130	8.43633	3.84955	1.13192	2.98907e-07	up
LOC_Os09g38310	27.9642	5.77465	2.27578	1.81721e-25	up
LOC_Os09g38510	21.3302	9.80356	1.12152	0.000949097	up
LOC_Os09g38870	0.567754	0.143599	1.98322	0.00982153	up
LOC_Os09g39910	51.3307	16.9627	1.59746	1.02924e-41	up
LOC_Os10g04370	7.39555	1.33348	2.47146	6.91898e-10	up
LOC_Os10g09240	240.642	26.5099	3.18229	2.35959e-22	up
LOC_Os10g12290	5.03647	2.59382	0.957333	0.00706946	up
LOC_Os10g20470	27.2688	8.98931	1.60097	2.56258e-11	up
LOC_Os10g21784	7.91742	1.51261	2.38799	4.99611e-11	up
LOC_Os10g23240	0.839858	0.120824	2.79724	2.53074e-10	up
LOC_Os10g24690	2.84258	0.616576	2.20485	0.00119418	up
LOC_Os10g25030	140.353	47.404	1.56598	3.06366e-28	up
LOC_Os10g25130	17.065	8.52641	1.00103	9.91927e-06	up
LOC_Os10g26150	115.447	39.7857	1.53691	0.0371794	up
LOC_Os10g28080	9.77456	4.05012	1.27107	0.00230843	up
LOC_Os10g28120	21.8312	10.0338	1.12153	0.000700758	up
LOC_Os10g29570	97.9737	9.95428	3.29901	3.16304e-37	up
LOC_Os10g31320	195.798	69.0918	1.50278	1.56964e-29	up
LOC_Os10g31850	26.9637	9.61217	1.48809	3.5891e-15	up
LOC_Os10g32680	71.9447	17.9187	2.00542	4.93489e-59	up
LOC_Os10g32810	121.788	16.7208	2.86466	6.296e-25	up
LOC_Os10g33190	108.24	16.1456	2.74501	1.34839e-58	up
LOC_Os10g33240	16.4564	3.24845	2.34082	4.02577e-20	up
LOC_Os10g33250	1.45246	0.121536	3.57903	2.44232e-18	up
LOC_Os10g33830	3.28008	1.01171	1.69693	0.000883889	up
LOC_Os10g33990	49.1953	15.2615	1.68862	6.81181e-08	up
LOC_Os10g34930	54.5914	22.7264	1.26431	2.51674e-08	up
LOC_Os10g35070	176.95	8.21702	4.42858	2.08726e-65	up
LOC_Os10g35644	8.59697	2.91297	1.56134	1.43733e-08	up
LOC_Os10g36180	43.4848	0.301548	7.17198	3.23466e-06	up
LOC_Os10g37110	41.7891	19.6195	1.09084	4.72966e-10	up
LOC_Os10g37340	129.243	54.9347	1.2343	3.71299e-05	up
LOC_Os10g37660	4.99743	1.92712	1.37474	1.02695e-06	up
LOC_Os10g38000	5.30192	0.267917	4.30666	0.000575043	up
LOC_Os10g38470	33.1027	4.41978	2.9049	1.19851e-29	up
LOC_Os10g38870	120.881	54.105	1.15975	0.000304021	up
LOC_Os10g39090	12.9079	5.50836	1.22856	0.0242677	up
LOC_Os10g39920	17.2589	2.96298	2.54222	1.588e-13	up
LOC_Os10g40600	24.7038	11.2461	1.13531	2.32831e-07	up
LOC_Os10g41480	2.11576	0.916361	1.20719	0.0103933	up
LOC_Os10g41490	58.3724	28.0421	1.05769	6.14645e-16	up
LOC_Os10g41550	7.80135	2.41993	1.68876	1.2897e-06	up
LOC_Os11g01530	213.474	47.8255	2.15821	7.64156e-38	up
LOC_Os11g02350	6331.9	2986.18	1.08434	1.89729e-09	up
LOC_Os11g02570	13.7861	4.68825	1.5561	6.5239e-08	up
LOC_Os11g02820	35.1677	16.9687	1.05137	0.000469698	up
LOC_Os11g02840	12.6097	4.89475	1.36522	1.86952e-08	up
LOC_Os11g03300	16.2446	2.87278	2.49944	9.57908e-30	up
LOC_Os11g03780	10.2988	4.6673	1.14182	6.94238e-14	up
LOC_Os11g05170	6.87032	0.881987	2.96155	0.0219075	up
LOC_Os11g05410	4.71419	0.646468	2.86636	1.87184e-08	up
LOC_Os11g05470	10.2974	0.371596	4.7924	4.78207e-46	up
LOC_Os11g05640	1.43961	0.423955	1.7637	0.0124704	up
LOC_Os11g05810	9.74564	4.17525	1.22289	0.00715332	up
LOC_Os11g06130	11.8039	6.22827	0.922363	7.84113e-08	up
LOC_Os11g07911	109.911	0.475571	7.85245	4.184e-11	up
LOC_Os11g07960	68.2773	31.1322	1.133	6.82243e-11	up
LOC_Os11g08100	6.40482	2.9858	1.10104	2.86977e-06	up
LOC_Os11g08200	2.29709	1.15313	0.994248	0.000124981	up
LOC_Os11g09680	31.756	11.7111	1.43915	2.08458e-10	up
LOC_Os11g09684	16.262	5.78416	1.49133	4.13043e-05	up
LOC_Os11g10470	56.652	8.68095	2.7062	0.0379235	up
LOC_Os11g12530	27.4943	10.316	1.41426	1.42499e-20	up
LOC_Os11g13670	117.694	47.363	1.31321	3.34761e-16	up
LOC_Os11g15040	11.225	4.1907	1.42145	1.71909e-09	up
LOC_Os11g19864	1.6333	0.841094	0.957447	0.000244717	up
LOC_Os11g22449	6.75223	1.87672	1.84715	3.31657e-05	up
LOC_Os11g24070	7.79882	2.11037	1.88576	7.44383e-06	up
LOC_Os11g24120	2.15334	0.900263	1.25816	0.000585654	up
LOC_Os11g25780	154.9	33.3532	2.21544	9.25326e-69	up
LOC_Os11g26570	10.3354	0.0735039	7.13556	0.00024054	up
LOC_Os11g26760	39.4442	11.2587	1.80877	0.0023858	up
LOC_Os11g26780	36.7499	0.434109	6.40354	1.28965e-06	up
LOC_Os11g26790	148.584	0.95385	7.2833	2.82873e-05	up
LOC_Os11g27370	2.04889	0.400299	2.35569	0.0369532	up
LOC_Os11g29780	3.28467	0.274588	3.58041	6.52961e-06	up
LOC_Os11g29900	19.4547	7.21172	1.43171	2.9161e-21	up
LOC_Os11g31060	9.75411	1.24574	2.96901	3.64378e-18	up
LOC_Os11g32890	15.2557	0.212523	6.16559	0.00887328	up
LOC_Os11g35240	2.23878	0.897582	1.3186	0.00779109	up
LOC_Os11g37260	14.148	4.7983	1.56	3.12013e-28	up
LOC_Os11g37950	16.6172	6.10426	1.44479	0.0295659	up
LOC_Os11g38860	0.886547	0.290174	1.61128	2.83904e-08	up
LOC_Os11g38870	168.598	73.3582	1.20055	1.83106e-22	up
LOC_Os11g41600	113.204	52.3991	1.11132	1.81324e-19	up
LOC_Os11g42410	2.52083	0.291065	3.11448	0.00337359	up
LOC_Os11g42510	33.1981	12.061	1.46075	5.75093e-19	up
LOC_Os11g43140	0.698748	0.317388	1.13853	0.0414139	up
LOC_Os11g43760	2.37409	0.25008	3.24691	4.46284e-19	up
LOC_Os11g43790	11.1269	0.126428	6.4596	3.36403e-08	up
LOC_Os11g44810	1929.83	515.443	1.90459	7.9778e-59	up
LOC_Os11g45740	7.13525	3.14543	1.1817	0.000109913	up
LOC_Os11g47840	2.50931	0.92791	1.43524	0.00131639	up
LOC_Os11g48060	8.11654	1.81183	2.16342	2.76893e-15	up
LOC_Os12g01530	183.83	50.9713	1.85061	5.14686e-32	up
LOC_Os12g02080	19.6996	5.82702	1.75733	2.28288e-11	up
LOC_Os12g02320	4039.17	1815	1.15409	0.000380668	up
LOC_Os12g02500	4.45205	2.02318	1.13784	0.00663142	up
LOC_Os12g02800	38.8599	11.7823	1.72166	1.70087e-05	up
LOC_Os12g03040	22.0314	2.24504	3.29475	2.19007e-67	up
LOC_Os12g03720	21.7464	6.72281	1.69364	4.20694e-07	up
LOC_Os12g04880	6.16325	3.05857	1.01083	0.000242037	up
LOC_Os12g04980	0.946215	0.144888	2.70723	0.0076201	up
LOC_Os12g05210	14.0071	3.08584	2.18242	0.00197473	up
LOC_Os12g05330	2.38095	0.31462	2.91985	4.1358e-08	up
LOC_Os12g06270	0.454957	0.178443	1.35026	0.00760751	up
LOC_Os12g07030	6.05156	2.51901	1.26445	0.00647668	up
LOC_Os12g07550	29.3524	13.0239	1.17232	1.16264e-05	up
LOC_Os12g07640	7.25711	3.24556	1.16093	0.0111888	up
LOC_Os12g08260	71.5818	28.9556	1.30575	4.28186e-31	up
LOC_Os12g08700	9.40922	0.286106	5.03946	0.000175025	up
LOC_Os12g12080	6.63627	0.860319	2.94743	4.53839e-13	up
LOC_Os12g12250	34.6067	12.5898	1.45879	8.1415e-08	up
LOC_Os12g12880	41.9962	17.431	1.2686	0.00632746	up
LOC_Os12g13910	195.758	15.8647	3.62518	1.81802e-44	up
LOC_Os12g15530	1.19615	0.274193	2.12513	0.000218966	up
LOC_Os12g17950	7.89091	3.47099	1.18484	0.0205383	up
LOC_Os12g22489	58.0886	21.6352	1.42487	4.36642e-13	up
LOC_Os12g24020	17.7259	0.225152	6.29882	6.55276e-64	up
LOC_Os12g25090	52.1636	13.7607	1.92249	2.08925e-12	up
LOC_Os12g26290	7.68501	3.30657	1.21671	4.93446e-06	up
LOC_Os12g27440	15.4899	6.41794	1.27115	1.40756e-09	up
LOC_Os12g29220	94.6752	32.142	1.55853	4.65908e-34	up
LOC_Os12g29400	38.8025	5.55112	2.8053	3.28541e-22	up
LOC_Os12g33956	0.767719	0.382723	1.00428	0.0442423	up
LOC_Os12g34430	0.336973	0.0135403	4.6373	0.000392737	up
LOC_Os12g36640	339.486	155.374	1.12761	2.26491e-19	up
LOC_Os12g37519	14.7014	4.68294	1.65047	2.12347e-14	up
LOC_Os12g37690	3.4861	0.961963	1.85756	3.60907e-05	up
LOC_Os12g37970	57.4069	26.6304	1.10815	8.20813e-18	up
LOC_Os12g38051	6.55316	1.79159	1.87095	2.17405e-07	up
LOC_Os12g38100	55.0953	11.9826	2.20099	8.1727e-12	up
LOC_Os12g38170	248.399	57.4188	2.11306	3.21862e-21	up
LOC_Os12g38770	0.421444	0.10294	2.03354	0.0133504	up
LOC_Os12g39320	87.0869	31.0679	1.48703	1.30786e-30	up
LOC_Os12g39400	6.65062	2.37955	1.4828	3.01589e-05	up
LOC_Os12g40260	26.0268	7.50109	1.79483	5.19549e-06	up
LOC_Os12g42910	11.2576	2.83155	1.99124	4.31896e-07	up
LOC_Os12g43450	38.6378	17.1718	1.16997	0.0114165	up
LOC_Os12g43720	4.38733	1.67728	1.38722	1.06529e-09	up
LOC_Os01g01190	1.02132	3.00877	-1.55874	0.00157636	down
LOC_Os01g01650	38.8514	77.3218	-0.992907	1.45082e-06	down
LOC_Os01g01890	0.0947001	1.11987	-3.56382	2.42997e-05	down
LOC_Os01g02370	2.27095	7.09237	-1.64297	1.48511e-11	down
LOC_Os01g02400	4.31356	11.1753	-1.37336	6.50284e-15	down
LOC_Os01g02560	3.20961	6.54294	-1.02754	1.99014e-06	down
LOC_Os01g02570	1.04919	3.01403	-1.52241	2.56407e-06	down
LOC_Os01g02580	0.778366	2.61772	-1.74979	6.8573e-09	down
LOC_Os01g02600	2.8818	8.34764	-1.5344	2.80985e-11	down
LOC_Os01g02780	1.02669	2.71301	-1.40189	2.53264e-05	down
LOC_Os01g02790	1.13425	2.35097	-1.05151	0.000354642	down
LOC_Os01g03940	11.6414	37.8127	-1.6996	1.08118e-15	down
LOC_Os01g04230	1.72528	5.93116	-1.78148	0.00900557	down
LOC_Os01g04390	1.74006	7.922	-2.18672	4.13043e-05	down
LOC_Os01g04640	4.14351	9.32326	-1.16998	0.00113531	down
LOC_Os01g04710	20.4667	58.2719	-1.50952	0.000110522	down
LOC_Os01g05064	20.92	45.2114	-1.11181	6.82869e-06	down
LOC_Os01g05840	16.833	46.2301	-1.45754	0.0436498	down
LOC_Os01g07360	0.581206	1.62346	-1.48195	0.00132162	down
LOC_Os01g07500	1.79982	5.53828	-1.62159	3.27601e-07	down
LOC_Os01g07570	2.88956	7.31764	-1.34053	0.00885021	down
LOC_Os01g08020	2.08679	6.72944	-1.6892	9.89002e-14	down
LOC_Os01g08130	3.75193	9.68111	-1.36754	0.00447354	down
LOC_Os01g08150	0.0394819	0.599764	-3.92513	0.0202675	down
LOC_Os01g08220	2.70002	6.02915	-1.15899	0.000180958	down
LOC_Os01g08260	5.29406	13.2524	-1.32381	0.0266586	down
LOC_Os01g08470	1.76483	4.63284	-1.39237	0.00484217	down
LOC_Os01g08670	5.70687	15.9766	-1.48519	0.000213062	down
LOC_Os01g09190	1.58899	7.9714	-2.32672	1.21935e-05	down
LOC_Os01g09580	0.0203554	1.17191	-5.8473	0.00583192	down
LOC_Os01g09830	33.0776	95.3293	-1.52707	9.02139e-12	down
LOC_Os01g09930	0.557113	1.34803	-1.27481	0.00422322	down
LOC_Os01g10110	0.266053	0.845306	-1.66776	0.0183429	down
LOC_Os01g10180	3.9022	8.59346	-1.13895	0.0111942	down
LOC_Os01g10850	2.05422	7.63105	-1.89329	1.16321e-05	down
LOC_Os01g10950	5.60166	13.7775	-1.29839	4.2233e-07	down
LOC_Os01g11010	1.24261	6.08158	-2.29107	7.74356e-05	down
LOC_Os01g11160	31.4705	73.0284	-1.21446	6.63699e-17	down
LOC_Os01g11210	0.546596	1.96949	-1.84927	0.0477723	down
LOC_Os01g11340	1.91243	5.67815	-1.57001	3.11108e-05	down
LOC_Os01g11350	0.775739	7.02108	-3.17805	7.86055e-05	down
LOC_Os01g11660	0.400554	1.48196	-1.88744	0.0071446	down
LOC_Os01g11700	3.48303	7.41591	-1.09028	0.00231623	down
LOC_Os01g11810	2.69581	10.7353	-1.99357	0.00133585	down
LOC_Os01g11860	1.23819	3.6254	-1.54991	0.00164423	down
LOC_Os01g12130	1.51283	3.86221	-1.35217	0.000522381	down
LOC_Os01g12260	0.730571	1.83555	-1.32912	0.00547354	down
LOC_Os01g12640	5.44726	10.4041	-0.933554	0.00492933	down
LOC_Os01g12650	19.2687	47.6117	-1.30506	0.0149799	down
LOC_Os01g13140	0.753566	3.6746	-2.28578	0.00466353	down
LOC_Os01g14960	1.04014	3.47285	-1.73934	0.0272486	down
LOC_Os01g15039	0.733791	2.19041	-1.57776	0.00357521	down
LOC_Os01g15970	3.32183	7.75044	-1.2223	0.000306726	down
LOC_Os01g16140	30.8461	70.1711	-1.18579	0.00308392	down
LOC_Os01g16450	2.5031	8.55363	-1.77282	0.00704959	down
LOC_Os01g16650	0.173409	4.95156	-4.83563	0.000102524	down
LOC_Os01g17214	10.2166	32.2484	-1.6583	1.40067e-27	down
LOC_Os01g18930	0.309215	5.65429	-4.19266	1.9085e-11	down
LOC_Os01g19170	1.2359	3.0461	-1.3014	0.0260193	down
LOC_Os01g19220	1.98127	7.6603	-1.95097	1.12205e-05	down
LOC_Os01g19370	1.16611	2.96382	-1.34576	0.00790277	down
LOC_Os01g19480	5.39923	10.7185	-0.989279	2.23266e-07	down
LOC_Os01g20160	0.215991	0.853416	-1.98228	0.0123913	down
LOC_Os01g20780	3.99271	17.2276	-2.10928	1.40937e-05	down
LOC_Os01g20830	12.4518	41.2477	-1.72796	2.68132e-30	down
LOC_Os01g21034	10.6136	33.3713	-1.6527	2.71701e-10	down
LOC_Os01g22230	5.41241	12.6495	-1.22474	9.9532e-05	down
LOC_Os01g22910	2.69395	12.6915	-2.23606	5.73342e-07	down
LOC_Os01g22980	4.89836	25.5569	-2.38334	3.5008e-63	down
LOC_Os01g23970	0.297768	1.48087	-2.31419	6.89988e-07	down
LOC_Os01g24780	2.40626	5.36788	-1.15756	0.00015573	down
LOC_Os01g25484	107.345	226.424	-1.07677	3.39828e-09	down
LOC_Os01g25500	17.4952	37.026	-1.08158	7.79781e-05	down
LOC_Os01g25540	60.0314	173.159	-1.52831	4.03942e-09	down
LOC_Os01g25560	7.04512	24.8733	-1.8199	0.000149187	down
LOC_Os01g26210	0.0342177	0.349787	-3.35366	0.00427697	down
LOC_Os01g26270	0.942113	2.40067	-1.34947	4.63698e-06	down
LOC_Os01g26300	0.199421	0.699109	-1.8097	0.0204839	down
LOC_Os01g27230	9.93869	25.8048	-1.37651	8.24201e-15	down
LOC_Os01g32460	24.4305	47.9702	-0.973455	4.329e-07	down
LOC_Os01g32670	2.87667	45.2717	-3.97614	2.72243e-09	down
LOC_Os01g32770	2.09185	11.5184	-2.46109	3.35223e-05	down
LOC_Os01g32920	0.470525	2.98339	-2.66461	0.028176	down
LOC_Os01g33160	0.52122	6.1814	-3.56797	2.11841e-11	down
LOC_Os01g34560	1.42281	8.09253	-2.50785	0.000335249	down
LOC_Os01g34850	0.220484	0.798738	-1.85705	0.00460047	down
LOC_Os01g35330	8.79069	17.8348	-1.02064	0.00145904	down
LOC_Os01g36390	0.105239	0.813209	-2.94996	0.00069222	down
LOC_Os01g36460	3.86305	9.9772	-1.3689	0.00506655	down
LOC_Os01g36580	0.564354	1.87086	-1.72903	0.000157249	down
LOC_Os01g36660	1.20758	3.01947	-1.32217	0.00456535	down
LOC_Os01g36720	23.7546	123.944	-2.3834	6.98827e-38	down
LOC_Os01g37110	0.0800418	0.562598	-2.81328	0.032963	down
LOC_Os01g37910	193.985	491.963	-1.34261	6.25899e-26	down
LOC_Os01g38229	68.0438	141.996	-1.06131	1.27266e-17	down
LOC_Os01g38359	9.23308	21.611	-1.22688	2.30388e-14	down
LOC_Os01g39330	1.70564	4.94958	-1.53699	6.06101e-06	down
LOC_Os01g39830	3.06204	7.53104	-1.29835	1.03774e-13	down
LOC_Os01g40550	1.96432	5.17753	-1.39823	0.00503978	down
LOC_Os01g40870	7.74893	20.6657	-1.41517	2.79357e-14	down
LOC_Os01g41200	2.44135	5.35376	-1.13288	0.0416721	down
LOC_Os01g41240	136.549	412.391	-1.59459	2.91817e-21	down
LOC_Os01g41550	5.39542	10.6008	-0.974367	0.00204132	down
LOC_Os01g42200	2.98676	13.0557	-2.12803	7.2976e-06	down
LOC_Os01g42294	15.1921	32.8853	-1.11412	1.16035e-05	down
LOC_Os01g42520	23.9352	48.92	-1.03129	0.0447913	down
LOC_Os01g42900	0.992631	4.33013	-2.12508	0.000604428	down
LOC_Os01g42960	2.44976	5.80268	-1.24408	0.000672836	down
LOC_Os01g43140	1.42613	4.17768	-1.55059	0.0012808	down
LOC_Os01g43230	8.02313	23.6745	-1.5611	9.16983e-16	down
LOC_Os01g43270	18.5179	38.4528	-1.05417	2.6699e-07	down
LOC_Os01g43460	0.344537	1.45188	-2.07519	0.00235904	down
LOC_Os01g43590	1.79026	5.0111	-1.48495	0.000204897	down
LOC_Os01g43610	0.70917	2.14535	-1.59701	0.0103733	down
LOC_Os01g43750	1.12016	3.91541	-1.80547	2.35392e-07	down
LOC_Os01g44069	14.1147	26.9315	-0.932101	0.0149968	down
LOC_Os01g44090	1.83578	4.43587	-1.27283	0.00548665	down
LOC_Os01g44110	3.26807	14.2689	-2.12636	4.58186e-08	down
LOC_Os01g44130	1.45228	5.04313	-1.796	2.16404e-08	down
LOC_Os01g44390	33.4591	72.2643	-1.11089	8.00119e-08	down
LOC_Os01g45140	0.786582	7.06147	-3.1663	9.74667e-12	down
LOC_Os01g45274	595.256	1628.67	-1.45211	2.55431e-31	down
LOC_Os01g45700	8.31538	53.5946	-2.68823	1.61273e-06	down
LOC_Os01g45914	3.08115	86.5927	-4.81271	1.98827e-05	down
LOC_Os01g46340	4.78629	11.1833	-1.22436	0.012958	down
LOC_Os01g46350	4.75764	11.1157	-1.22428	1.32643e-07	down
LOC_Os01g46400	11.2103	22.1821	-0.984577	0.0131872	down
LOC_Os01g47050	0.511038	1.41811	-1.47247	0.00191621	down
LOC_Os01g47080	8.73147	18.3452	-1.0711	2.54916e-06	down
LOC_Os01g47400	18.6313	35.0095	-0.910015	0.00473879	down
LOC_Os01g47635	0.351608	0.963046	-1.45364	0.00870985	down
LOC_Os01g47780	76.5451	238.768	-1.64123	9.51664e-06	down
LOC_Os01g48620	0.470811	1.0894	-1.21032	0.00466807	down
LOC_Os01g48710	0.414099	1.22091	-1.55991	0.0472807	down
LOC_Os01g50090	1.05391	2.47622	-1.23239	2.46513e-07	down
LOC_Os01g50820	0.797621	7.34984	-3.20394	8.76885e-17	down
LOC_Os01g51060	1.32652	3.59897	-1.43994	0.0109571	down
LOC_Os01g51260	0.243145	1.30449	-2.4236	0.0010106	down
LOC_Os01g51840	7.65469	16.1185	-1.0743	3.99859e-07	down
LOC_Os01g51890	7.54912	16.3335	-1.11345	6.22589e-15	down
LOC_Os01g52160	4.86064	19.6374	-2.01439	1.13033e-12	down
LOC_Os01g52710	2.75392	7.23079	-1.39267	1.2831e-06	down
LOC_Os01g52770	1.21975	13.4553	-3.46352	2.97084e-06	down
LOC_Os01g52780	0.805988	3.07106	-1.9299	1.0633e-05	down
LOC_Os01g53060	33.3351	74.4076	-1.15841	4.51248e-17	down
LOC_Os01g53330	11.9657	28.8287	-1.26861	1.23678e-11	down
LOC_Os01g53420	2.62853	5.97995	-1.18588	0.00133741	down
LOC_Os01g53640	1.43678	3.45488	-1.26579	8.23319e-05	down
LOC_Os01g53790	2.50872	8.25742	-1.71874	0.0140239	down
LOC_Os01g55000	33.9259	102.06	-1.58896	1.2722e-05	down
LOC_Os01g55150	1.59426	13.2269	-3.05252	3.24399e-05	down
LOC_Os01g55190	6.66019	21.6667	-1.70185	0.018314	down
LOC_Os01g55260	0.214698	0.644564	-1.58601	0.0124208	down
LOC_Os01g55370	1.75461	4.38702	-1.32209	0.000291076	down
LOC_Os01g56870	0.355955	0.941453	-1.40319	0.00167648	down
LOC_Os01g57690	2.95568	8.46047	-1.51725	0.0208615	down
LOC_Os01g57770	1.15099	3.20779	-1.4787	0.011817	down
LOC_Os01g57880	2.66601	10.5757	-1.988	3.5714e-05	down
LOC_Os01g58022	3.24667	7.2501	-1.15904	0.00196189	down
LOC_Os01g58100	0.843391	3.14232	-1.89756	0.000425657	down
LOC_Os01g58280	0.618896	1.57583	-1.34834	0.000476135	down
LOC_Os01g58550	10.3449	34.0035	-1.71676	0.000172112	down
LOC_Os01g59120	0.113991	1.84907	-4.0198	0.0418249	down
LOC_Os01g59870	3.01384	48.5227	-4.00899	7.86496e-09	down
LOC_Os01g60330	1.56632	5.06869	-1.69423	0.00225783	down
LOC_Os01g60340	0.420496	1.54226	-1.87488	6.65814e-07	down
LOC_Os01g60770	9.51596	65.5839	-2.78492	4.99322e-05	down
LOC_Os01g60810	2.41671	5.91418	-1.29114	0.000449886	down
LOC_Os01g61010	13.643	27.5299	-1.01284	1.67454e-13	down
LOC_Os01g61330	12.4086	28.8969	-1.21957	8.29357e-07	down
LOC_Os01g61570	0.656212	2.33377	-1.83043	0.00116451	down
LOC_Os01g61940	1.5114	3.51592	-1.21802	0.00325771	down
LOC_Os01g63180	0.508783	4.11796	-3.0168	4.73707e-12	down
LOC_Os01g63540	0.753344	3.60361	-2.25806	0.00384657	down
LOC_Os01g63580	13.668	36.5218	-1.41795	0.00332128	down
LOC_Os01g63620	81.5809	172.249	-1.0782	8.61145e-22	down
LOC_Os01g63770	10.3818	25.0475	-1.2706	9.93655e-10	down
LOC_Os01g64100	2.10908	6.19308	-1.55404	2.48573e-05	down
LOC_Os01g64110	0.803332	3.48311	-2.11631	5.69088e-07	down
LOC_Os01g64860	12.652	28.9385	-1.19362	2.57742e-11	down
LOC_Os01g65030	1.88378	4.09961	-1.12186	0.000199155	down
LOC_Os01g65490	0.21541	1.44638	-2.7473	0.0124888	down
LOC_Os01g65550	9.13298	18.2921	-1.00207	0.00140932	down
LOC_Os01g65790	10.8948	22.1399	-1.023	0.0110531	down
LOC_Os01g65880	24.1675	68.8812	-1.51105	1.21842e-22	down
LOC_Os01g66490	4.55821	9.71562	-1.09184	3.26136e-05	down
LOC_Os01g66510	1.34477	2.99009	-1.15282	0.000267799	down
LOC_Os01g66700	0.0475689	0.441788	-3.21526	0.000199552	down
LOC_Os01g66740	0.133741	0.480092	-1.84387	0.0272128	down
LOC_Os01g66890	11.041	25.2929	-1.19586	1.71558e-10	down
LOC_Os01g67110	0.113561	10.1956	-6.48833	0.00103721	down
LOC_Os01g67360	2.15641	5.18468	-1.26563	7.03237e-06	down
LOC_Os01g67950	4.949	13.3417	-1.43074	0.000431566	down
LOC_Os01g68140	0.464518	2.58586	-2.47683	1.33744e-07	down
LOC_Os01g68589	1.56198	11.9467	-2.93517	1.46501e-15	down
LOC_Os01g68720	3.422	7.26531	-1.08618	0.000547969	down
LOC_Os01g68740	1.85283	6.9744	-1.91234	1.27441e-06	down
LOC_Os01g68890	11.8625	25.7173	-1.11633	7.64603e-07	down
LOC_Os01g68900	3.2286	9.31504	-1.52866	9.8362e-06	down
LOC_Os01g69200	1.49466	3.35341	-1.16581	0.00341	down
LOC_Os01g69290	1.67484	6.82511	-2.02683	0.0116689	down
LOC_Os01g70100	2.56348	6.09293	-1.24903	0.00983571	down
LOC_Os01g70310	12.2228	24.4367	-0.999477	1.37988e-07	down
LOC_Os01g70930	10.101	48.3	-2.25753	5.72728e-26	down
LOC_Os01g70970	0.05087	0.884172	-4.11944	0.00978917	down
LOC_Os01g71170	13.3587	55.8404	-2.06353	1.48716e-06	down
LOC_Os01g71320	2.5472	5.99111	-1.23391	4.2049e-07	down
LOC_Os01g71474	14.9807	38.063	-1.34528	3.60032e-14	down
LOC_Os01g71810	1.58679	7.57269	-2.25469	1.21804e-07	down
LOC_Os01g72290	16.1629	71.4314	-2.14387	8.13097e-08	down
LOC_Os01g72330	1.90548	18.2239	-3.25761	4.12649e-58	down
LOC_Os01g72510	0.85122	3.21369	-1.91663	0.0419602	down
LOC_Os01g72700	2.40173	12.5443	-2.38488	1.01746e-06	down
LOC_Os01g72760	0.990178	2.47089	-1.31927	0.00441545	down
LOC_Os01g73940	464.999	1078.2	-1.21333	2.40242e-18	down
LOC_Os01g73980	12.8928	32.9869	-1.35533	0.00010496	down
LOC_Os01g74020	79.372	190.664	-1.26433	8.19313e-28	down
LOC_Os01g74300	322.474	1354.04	-2.07001	6.24597e-65	down
LOC_Os01g74550	0.165821	0.527117	-1.66849	0.043995	down
LOC_Os02g01140	0.403985	3.65573	-3.17778	0.000579361	down
LOC_Os02g01210	24.3211	75.5572	-1.63536	9.86721e-29	down
LOC_Os02g02120	1.95507	4.20955	-1.10644	1.16283e-06	down
LOC_Os02g02400	257.015	551.942	-1.10267	4.07934e-20	down
LOC_Os02g02450	0.300007	0.87438	-1.54326	0.0413836	down
LOC_Os02g02460	1.0703	2.65901	-1.31287	0.00208397	down
LOC_Os02g02830	31.2208	89.0068	-1.51141	1.9625e-25	down
LOC_Os02g02930	0.735965	1.58298	-1.10493	0.0141118	down
LOC_Os02g03790	2.81652	9.67941	-1.781	4.41287e-06	down
LOC_Os02g04170	0.553447	1.84184	-1.73463	2.11718e-06	down
LOC_Os02g04540	0.306742	1.56991	-2.35559	0.00377098	down
LOC_Os02g05040	0.105218	0.361356	-1.78003	0.00422938	down
LOC_Os02g06090	0.0791143	0.368704	-2.22045	0.0232406	down
LOC_Os02g06140	0.179059	0.5058	-1.49813	0.0386393	down
LOC_Os02g06150	0.554894	1.61443	-1.54074	0.0286732	down
LOC_Os02g07190	1.01576	2.81285	-1.46948	0.0293934	down
LOC_Os02g07380	0.340044	0.698787	-1.03913	0.00596399	down
LOC_Os02g09630	2.4961	5.21276	-1.06237	0.0059751	down
LOC_Os02g09740	0.705639	2.43753	-1.78842	0.000178549	down
LOC_Os02g10020	0.0264071	0.597283	-4.49942	7.89939e-05	down
LOC_Os02g10030	1.11305	3.76111	-1.75664	0.0298803	down
LOC_Os02g10490	0.212042	0.590625	-1.4779	0.00183444	down
LOC_Os02g10520	0.871379	3.85586	-2.14568	1.63367e-07	down
LOC_Os02g10760	3.73468	9.98974	-1.41946	2.21391e-05	down
LOC_Os02g11700	4.58382	11.5212	-1.32967	1.59353e-05	down
LOC_Os02g12080	0.805396	2.98293	-1.88896	0.0143923	down
LOC_Os02g12480	99.2639	238.785	-1.26637	4.42548e-29	down
LOC_Os02g12730	4.64016	12.0489	-1.37665	5.86586e-16	down
LOC_Os02g12890	27.7402	67.3382	-1.27945	3.77839e-08	down
LOC_Os02g13520	0.325393	0.975553	-1.58404	0.0102434	down
LOC_Os02g13660	0.695699	25.9267	-5.21983	0.0413836	down
LOC_Os02g13870	26.3176	63.1614	-1.26302	8.49683e-05	down
LOC_Os02g14160	6.0715	34.4589	-2.50475	5.71238e-05	down
LOC_Os02g14440	0.794411	2.41159	-1.60203	0.0460013	down
LOC_Os02g14490	0.553621	1.64705	-1.57291	0.00300612	down
LOC_Os02g14910	1.65526	4.82314	-1.54292	0.00278084	down
LOC_Os02g15690	2.56342	8.10156	-1.66013	4.22622e-09	down
LOC_Os02g15750	31.5788	64.598	-1.03253	2.03686e-16	down
LOC_Os02g15810	0.129725	5.1006	-5.29714	0.00293964	down
LOC_Os02g16030	11.7359	28.8688	-1.29858	9.49181e-07	down
LOC_Os02g17680	2.31104	5.2905	-1.19486	2.21225e-05	down
LOC_Os02g17710	1.00988	2.19295	-1.11868	0.000182095	down
LOC_Os02g17730	0.403174	1.1415	-1.50146	0.0228031	down
LOC_Os02g17780	0.552647	1.86983	-1.75848	6.67959e-07	down
LOC_Os02g17940	3.9126	8.35788	-1.09501	7.23948e-06	down
LOC_Os02g18070	1.10423	2.70255	-1.29128	1.72881e-10	down
LOC_Os02g18410	2.94172	40.3062	-3.77627	1.72395e-06	down
LOC_Os02g18450	20.7241	50.0665	-1.27253	8.11523e-17	down
LOC_Os02g18540	3.38136	8.30858	-1.297	3.15037e-05	down
LOC_Os02g19640	12.5692	26.3645	-1.0687	4.51672e-06	down
LOC_Os02g20040	12.2912	24.472	-0.993514	5.9955e-06	down
LOC_Os02g20540	10.5846	69.4565	-2.71414	1.20083e-17	down
LOC_Os02g20560	74.0543	166.851	-1.1719	1.27578e-13	down
LOC_Os02g21009	1.85737	13.9791	-2.91194	1.96912e-41	down
LOC_Os02g21090	0.755924	1.78581	-1.24026	0.00454809	down
LOC_Os02g24205	1.92788	4.15995	-1.10955	0.00769958	down
LOC_Os02g28074	2.04225	5.30743	-1.37785	3.42697e-11	down
LOC_Os02g28465	0.497503	0.905699	-0.864326	0.014821	down
LOC_Os02g30240	2.8919	14.5986	-2.33574	6.29945e-08	down
LOC_Os02g32650	4.2369	10.8177	-1.35231	0.00131538	down
LOC_Os02g32850	2.30887	5.17536	-1.16447	6.09245e-05	down
LOC_Os02g33550	92.6437	219.086	-1.24173	1.89695e-21	down
LOC_Os02g33780	1.06314	3.16509	-1.57392	5.05927e-05	down
LOC_Os02g34490	0.345331	0.815745	-1.24014	0.000759949	down
LOC_Os02g35180	0.690655	11.7166	-4.08445	4.38952e-50	down
LOC_Os02g35230	0.0163424	0.433349	-4.72884	0.00016037	down
LOC_Os02g35440	5.04775	11.2892	-1.16123	0.00228476	down
LOC_Os02g35490	0.500917	1.08574	-1.11603	0.0186384	down
LOC_Os02g35530	4.69	9.2788	-0.98435	0.0212728	down
LOC_Os02g35660	1.6292	3.58588	-1.13816	0.00176173	down
LOC_Os02g35970	2.62543	5.32416	-1.02	0.00180803	down
LOC_Os02g36110	0.498364	1.5095	-1.5988	0.04445	down
LOC_Os02g36140	0.465753	0.961331	-1.04547	0.0177571	down
LOC_Os02g36190	0.861763	2.24385	-1.38061	0.00222224	down
LOC_Os02g36210	5.95568	12.8371	-1.10798	7.70282e-11	down
LOC_Os02g36264	1.06836	2.57638	-1.26995	5.11154e-06	down
LOC_Os02g36500	0.870874	4.85951	-2.48028	5.99253e-05	down
LOC_Os02g36550	5.23636	12.6053	-1.2674	1.60754e-06	down
LOC_Os02g36590	54.4085	134.936	-1.31037	9.33129e-29	down
LOC_Os02g36890	2.10963	6.71945	-1.67135	0.0228901	down
LOC_Os02g38970	2.15795	4.67462	-1.11519	0.0179545	down
LOC_Os02g39140	2.32317	4.59877	-0.98515	0.00783815	down
LOC_Os02g39510	0.907275	12.4711	-3.78091	5.45164e-14	down
LOC_Os02g40010	0.603399	4.5831	-2.92514	7.98074e-09	down
LOC_Os02g40260	7.61237	34.6975	-2.18841	4.97449e-20	down
LOC_Os02g40410	0.9617	2.2211	-1.20761	0.00011845	down
LOC_Os02g40440	0.743726	10.3656	-3.80089	0.00938598	down
LOC_Os02g40664	0.607413	1.60119	-1.3984	0.000289211	down
LOC_Os02g41460	2.28337	6.8221	-1.57905	3.66755e-05	down
LOC_Os02g41710	1.81587	3.57436	-0.977023	0.00438656	down
LOC_Os02g41780	4.46661	11.0464	-1.30632	6.86984e-08	down
LOC_Os02g41800	3.85807	9.1377	-1.24395	1.25851e-05	down
LOC_Os02g42380	1.79224	7.207	-2.00763	0.0124704	down
LOC_Os02g42430	0.471697	6.61907	-3.8107	9.31408e-10	down
LOC_Os02g42620	0.726343	1.83593	-1.33779	0.00510919	down
LOC_Os02g42650	2.12832	8.83097	-2.05286	0.000472492	down
LOC_Os02g42660	1.16714	3.28714	-1.49386	0.00951265	down
LOC_Os02g43280	18.2062	49.1593	-1.43304	1.77947e-28	down
LOC_Os02g43290	4.98409	9.68499	-0.95842	0.00514703	down
LOC_Os02g43640	13.6737	50.4028	-1.8821	0.0192858	down
LOC_Os02g43660	11.5069	29.0405	-1.33557	0.0298491	down
LOC_Os02g44108	1.33987	12.3999	-3.21016	4.17971e-09	down
LOC_Os02g44320	63.2266	368.248	-2.54208	6.60536e-14	down
LOC_Os02g44654	3.57902	14.1394	-1.98208	0.00443747	down
LOC_Os02g44670	1.13435	5.9034	-2.37968	6.03873e-05	down
LOC_Os02g44720	2.31276	6.82593	-1.56141	0.00165186	down
LOC_Os02g44940	27.0098	57.0935	-1.07984	9.13283e-07	down
LOC_Os02g45010	0.262377	0.768371	-1.55016	0.0272879	down
LOC_Os02g45170	3.52244	10.9801	-1.64024	5.42628e-24	down
LOC_Os02g45620	1.28657	5.18776	-2.01158	0.000204765	down
LOC_Os02g46680	3.18117	9.38763	-1.56121	0.00496232	down
LOC_Os02g46910	5.04592	15.7246	-1.63983	7.40879e-09	down
LOC_Os02g47130	0.234612	1.16134	-2.30745	0.0230296	down
LOC_Os02g47420	4.91419	11.7408	-1.25651	0.00448022	down
LOC_Os02g47790	1.50124	4.21302	-1.4887	0.000421026	down
LOC_Os02g48450	0.386169	2.03581	-2.39829	4.13363e-07	down
LOC_Os02g48770	5.16126	13.9568	-1.43518	0.00482045	down
LOC_Os02g49480	0.398702	1.3002	-1.70535	0.0167943	down
LOC_Os02g49680	25.4647	51.5537	-1.01758	5.64051e-09	down
LOC_Os02g49850	5.49013	12.5764	-1.19581	0.00207303	down
LOC_Os02g49950	1.12512	3.41606	-1.60226	2.89952e-06	down
LOC_Os02g50000	1.72718	8.25773	-2.25732	0.033832	down
LOC_Os02g50040	1.69773	7.5845	-2.15945	5.07258e-05	down
LOC_Os02g50240	189.379	382.714	-1.015	5.02765e-12	down
LOC_Os02g50330	1.12698	2.5755	-1.19239	3.71664e-06	down
LOC_Os02g50470	3.57048	7.26702	-1.02524	0.0135819	down
LOC_Os02g50630	0.131152	0.823084	-2.6498	0.000173299	down
LOC_Os02g50810	16.1088	36.1299	-1.16534	8.59178e-10	down
LOC_Os02g51060	1.66458	6.07304	-1.86726	1.8088e-10	down
LOC_Os02g51320	1.86821	5.64539	-1.59541	0.00020388	down
LOC_Os02g51620	1.97573	6.45964	-1.70907	2.62965e-06	down
LOC_Os02g51680	0.81206	2.46354	-1.60108	0.00133501	down
LOC_Os02g51860	4.31731	8.73585	-1.01682	0.000809006	down
LOC_Os02g51900	0.753423	1.97107	-1.38744	0.00142643	down
LOC_Os02g52280	3.01158	6.54772	-1.12047	5.52371e-06	down
LOC_Os02g52550	10.5663	23.3005	-1.14089	0.000138329	down
LOC_Os02g52930	0.486322	1.73621	-1.83596	0.00518998	down
LOC_Os02g52934	1.62487	4.27299	-1.39492	6.94425e-05	down
LOC_Os02g53000	1.37574	2.90246	-1.07707	0.0263332	down
LOC_Os02g53130	2.31879	20.1864	-3.12194	9.0546e-13	down
LOC_Os02g53200	11.2343	23.3013	-1.0525	0.000281046	down
LOC_Os02g53360	0.431439	3.07349	-2.83265	1.50703e-05	down
LOC_Os02g53510	11.1471	31.0668	-1.4787	5.284e-08	down
LOC_Os02g53530	12.9317	39.611	-1.61499	1.32276e-13	down
LOC_Os02g53840	0.48258	2.6836	-2.47533	5.00848e-06	down
LOC_Os02g54060	7.98853	16.1341	-1.01411	7.0266e-05	down
LOC_Os02g54190	0.129906	2.56989	-4.30616	4.66992e-05	down
LOC_Os02g54640	3.28346	7.31232	-1.15511	0.000102807	down
LOC_Os02g54830	2.92925	6.95409	-1.24733	0.000543884	down
LOC_Os02g55870	1.75256	8.17243	-2.2213	3.01373e-05	down
LOC_Os02g56490	0.272838	1.62976	-2.57854	0.00348826	down
LOC_Os02g56540	0.0264666	0.823078	-4.95878	0.00180116	down
LOC_Os02g56860	0.634803	1.75123	-1.46399	0.011654	down
LOC_Os02g56920	20.806	52.184	-1.3266	3.8776e-24	down
LOC_Os02g57110	10.768	93.1726	-3.11315	0.00407763	down
LOC_Os02g57560	2.85279	6.19167	-1.11795	0.00322632	down
LOC_Os02g58170	1.34308	2.98661	-1.15296	0.000605022	down
LOC_Os02g58220	0.873422	2.80121	-1.6813	0.0382861	down
LOC_Os02g58390	1.52178	4.26994	-1.48845	0.00233135	down
LOC_Os02g58480	0.988789	2.55448	-1.36929	0.000378354	down
LOC_Os02g58530	0.71235	2.23718	-1.65102	0.00297337	down
LOC_Os02g58720	11.3741	42.8974	-1.91514	5.95472e-18	down
LOC_Os02g58740	2.37784	7.20279	-1.59891	0.0420225	down
LOC_Os03g01300	15.9195	52.6006	-1.72429	3.00971e-12	down
LOC_Os03g01320	11.3024	51.5939	-2.19057	1.7608e-21	down
LOC_Os03g01800	21.8015	63.3028	-1.53784	0.015348	down
LOC_Os03g02040	35.7379	100.8	-1.49597	2.30306e-14	down
LOC_Os03g02240	10.4194	22.6529	-1.12043	2.20354e-11	down
LOC_Os03g02280	1.86844	6.77	-1.85732	0.00182244	down
LOC_Os03g02400	0.829327	3.03917	-1.87366	0.00465373	down
LOC_Os03g02610	2.59333	5.51535	-1.08865	0.0170092	down
LOC_Os03g02740	0.113156	0.4761	-2.07296	0.00671122	down
LOC_Os03g02750	4.06445	13.7072	-1.7538	0.00322632	down
LOC_Os03g02820	0.486706	1.61334	-1.72892	4.42128e-05	down
LOC_Os03g02920	10.5814	31.9875	-1.59598	1.2934e-05	down
LOC_Os03g03350	1.75094	4.35728	-1.3153	0.00708847	down
LOC_Os03g03570	0.666065	2.30483	-1.79093	0.00012178	down
LOC_Os03g03630	0.375679	3.3115	-3.13991	0.011228	down
LOC_Os03g03790	8.14117	17.3075	-1.08809	8.98775e-06	down
LOC_Os03g04220	6.9178	34.3052	-2.31004	0.000255315	down
LOC_Os03g04240	8.32751	23.677	-1.50753	0.0119473	down
LOC_Os03g04250	0.684643	4.90852	-2.84186	4.03064e-05	down
LOC_Os03g04470	102.527	212.185	-1.04932	1.56765e-17	down
LOC_Os03g04570	8.52129	16.8955	-0.987495	1.90751e-06	down
LOC_Os03g04680	17.9391	37.9236	-1.07999	0.000332557	down
LOC_Os03g04710	19.1943	50.6055	-1.39861	1.22006e-08	down
LOC_Os03g05270	5.29641	9.98509	-0.914761	2.47984e-06	down
LOC_Os03g05520	9.73303	28.9113	-1.57067	0.0375348	down
LOC_Os03g05530	0.85653	9.20167	-3.42532	8.26523e-29	down
LOC_Os03g05560	2.99215	6.70416	-1.16387	0.00793159	down
LOC_Os03g06170	5.22504	12.099	-1.21138	0.0172711	down
LOC_Os03g06570	4.95793	11.9133	-1.26476	9.93669e-05	down
LOC_Os03g06940	3.6062	11.4005	-1.66055	2.24084e-08	down
LOC_Os03g07450	4.42166	14.9338	-1.75592	0.000250093	down
LOC_Os03g07810	0.120856	1.55036	-3.68124	0.000151116	down
LOC_Os03g08460	1.29255	4.98487	-1.94734	3.3705e-06	down
LOC_Os03g08790	19.4381	51.4946	-1.40553	0.0250156	down
LOC_Os03g08930	0.458535	2.94513	-2.68323	0.00204047	down
LOC_Os03g09220	19.9859	46.4355	-1.21624	1.90649e-18	down
LOC_Os03g09940	4.199	10.1264	-1.27	6.05001e-09	down
LOC_Os03g10030	40.6633	90.328	-1.15145	1.0946e-08	down
LOC_Os03g10210	0.400488	1.32311	-1.7241	0.0499408	down
LOC_Os03g10880	3.84135	16.4651	-2.09973	1.22178e-19	down
LOC_Os03g11110	1.94408	4.80841	-1.30647	6.57648e-06	down
LOC_Os03g11210	4.67347	19.2817	-2.04466	2.4812e-16	down
LOC_Os03g11300	1.31992	2.91412	-1.14261	8.9346e-05	down
LOC_Os03g11400	0.0255205	0.617307	-4.59626	0.0187635	down
LOC_Os03g11600	0.751434	2.16365	-1.52575	0.0409061	down
LOC_Os03g11734	2.13176	4.40542	-1.04723	0.0196452	down
LOC_Os03g11950	0.60607	2.57051	-2.0845	0.00609543	down
LOC_Os03g12530	5.46096	11.8271	-1.11487	1.08925e-10	down
LOC_Os03g12700	17.5052	42.8583	-1.29179	4.99843e-15	down
LOC_Os03g12790	7.26319	15.3621	-1.0807	2.53507e-05	down
LOC_Os03g13200	49.3102	105.533	-1.09774	2.38821e-09	down
LOC_Os03g13570	8.50194	29.9916	-1.81869	9.27472e-18	down
LOC_Os03g14130	8.8292	72.9206	-3.04597	0.00146551	down
LOC_Os03g14654	1.94304	33.5031	-4.10791	8.56738e-10	down
LOC_Os03g15050	15.7619	36.7214	-1.22018	1.62812e-19	down
LOC_Os03g15320	0.271761	2.62957	-3.27442	3.50989e-06	down
LOC_Os03g15370	1.53395	9.32835	-2.60437	6.65725e-05	down
LOC_Os03g15460	7.08684	18.1806	-1.35918	1.36227e-06	down
LOC_Os03g15530	20.5108	42.3809	-1.04703	6.91763e-13	down
LOC_Os03g16718	0.204284	0.607952	-1.57338	0.0249871	down
LOC_Os03g17100	64.3149	175.109	-1.44503	0.0144085	down
LOC_Os03g17760	1.1458	8.89373	-2.95644	0.00233259	down
LOC_Os03g17840	6.47771	12.648	-0.965351	0.000273457	down
LOC_Os03g17960	0.0664509	0.648373	-3.28646	0.0087419	down
LOC_Os03g18110	2.33537	8.06022	-1.78717	2.94134e-06	down
LOC_Os03g18120	0.997	4.15047	-2.05761	2.12327e-08	down
LOC_Os03g18600	8.38323	51.3431	-2.61459	1.14999e-32	down
LOC_Os03g18960	0.532409	1.25283	-1.23458	0.00269873	down
LOC_Os03g19170	0.866513	3.29943	-1.92892	0.0354713	down
LOC_Os03g19220	7.37965	15.0464	-1.02779	0.00332494	down
LOC_Os03g19240	2.48476	5.13244	-1.04654	0.000805187	down
LOC_Os03g20330	16.3032	113.635	-2.80117	3.48482e-11	down
LOC_Os03g20440	2.06062	4.8157	-1.22467	0.024343	down
LOC_Os03g20450	0.543556	4.51187	-3.05322	0.000305687	down
LOC_Os03g20650	9.83035	19.4543	-0.984774	0.0136032	down
LOC_Os03g20760	20.9378	55.9248	-1.41737	1.70743e-07	down
LOC_Os03g21400	1.18966	4.57281	-1.94254	1.42748e-12	down
LOC_Os03g21710	1.46014	5.63033	-1.94711	1.64449e-07	down
LOC_Os03g21730	0.759388	2.80191	-1.8835	0.00153225	down
LOC_Os03g21960	0.675076	1.55656	-1.20524	0.0317468	down
LOC_Os03g22020	0.654786	2.8384	-2.11598	0.00190723	down
LOC_Os03g22040	0.787315	2.48554	-1.65855	9.25526e-07	down
LOC_Os03g22210	8.3104	35.3338	-2.08806	8.72109e-12	down
LOC_Os03g22230	1.45317	12.2852	-3.07964	1.86952e-08	down
LOC_Os03g23960	3.84347	8.46771	-1.13956	0.000433066	down
LOC_Os03g24560	5.3335	14.4562	-1.43854	0.000256546	down
LOC_Os03g24760	5.72039	12.0364	-1.07322	0.0170382	down
LOC_Os03g24910	1.05332	2.52193	-1.25958	0.00074293	down
LOC_Os03g24930	58.8692	166.925	-1.50361	3.11303e-35	down
LOC_Os03g24940	2.32836	7.56804	-1.70061	2.85845e-06	down
LOC_Os03g25550	1.07395	3.55099	-1.7253	3.74717e-06	down
LOC_Os03g27120	80.8447	237.344	-1.55375	9.50224e-40	down
LOC_Os03g27370	0.675384	1.5174	-1.16783	0.0208818	down
LOC_Os03g27480	0.635856	2.16213	-1.76568	0.00931371	down
LOC_Os03g28040	9.1635	25.0669	-1.45181	0.000280011	down
LOC_Os03g28330	59.2558	199.545	-1.75168	2.4036e-06	down
LOC_Os03g29190	3.04523	6.90337	-1.18075	4.41333e-05	down
LOC_Os03g30830	11.3617	24.7847	-1.12527	8.3798e-06	down
LOC_Os03g31679	79.1737	203.958	-1.36518	8.52648e-28	down
LOC_Os03g35600	0.351414	0.768196	-1.1283	0.0459158	down
LOC_Os03g37810	3.74957	8.75073	-1.22268	0.0409525	down
LOC_Os03g37960	0.718704	2.50026	-1.79861	0.000116528	down
LOC_Os03g38170	0.709398	1.93267	-1.44593	0.0499599	down
LOC_Os03g38470	0.0847274	1.44414	-4.09123	4.46622e-06	down
LOC_Os03g38640	1.16953	4.55999	-1.96309	0.00290539	down
LOC_Os03g39020	0.0959942	1.00411	-3.38682	0.0429897	down
LOC_Os03g39650	0.852469	2.10996	-1.3075	0.017209	down
LOC_Os03g40070	3.1867	9.70296	-1.60636	1.79065e-05	down
LOC_Os03g40100	4.56226	10.0047	-1.13285	4.96085e-08	down
LOC_Os03g40670	4.38541	9.83006	-1.16449	1.53479e-08	down
LOC_Os03g41480	0.153139	1.37567	-3.16722	9.90353e-09	down
LOC_Os03g43010	7.49375	15.7869	-1.07496	8.59455e-06	down
LOC_Os03g43440	29.6165	62.6254	-1.08035	5.49305e-12	down
LOC_Os03g43670	2.10634	5.01925	-1.25274	0.00029871	down
LOC_Os03g44740	6.75748	14.1012	-1.06126	0.000688044	down
LOC_Os03g44880	0.121229	10.609	-6.45141	1.43802e-05	down
LOC_Os03g45340	6.6297	14.8619	-1.16461	0.00390036	down
LOC_Os03g45450	1.29119	3.53783	-1.45416	0.0137563	down
LOC_Os03g45619	28.0235	99.8687	-1.8334	3.03616e-52	down
LOC_Os03g46150	5.85481	22.7943	-1.96098	0.0109362	down
LOC_Os03g46260	4.00568	11.4538	-1.51571	9.06645e-08	down
LOC_Os03g46920	0.0252514	1.07104	-5.40651	0.0102476	down
LOC_Os03g47010	0.994741	5.71696	-2.52286	3.84516e-08	down
LOC_Os03g47190	0.192796	0.717483	-1.89587	0.0354183	down
LOC_Os03g47210	1.63885	6.3612	-1.95661	0.00835966	down
LOC_Os03g47230	0.839568	3.12816	-1.8976	0.000394918	down
LOC_Os03g47730	0.0649241	1.58164	-4.60652	8.84636e-05	down
LOC_Os03g48560	4.99967	10.1503	-1.02162	0.00179569	down
LOC_Os03g48600	3.7617	7.43343	-0.982642	0.0159507	down
LOC_Os03g49610	1.22005	6.16009	-2.33602	0.000237068	down
LOC_Os03g49830	5.44631	13.2901	-1.287	4.46622e-06	down
LOC_Os03g50260	4.53544	10.408	-1.19837	0.0326212	down
LOC_Os03g50420	0.0106223	0.545316	-5.68192	0.0459685	down
LOC_Os03g50970	2.38546	8.73743	-1.87294	5.45906e-14	down
LOC_Os03g52070	4.05104	9.04437	-1.15873	3.74657e-05	down
LOC_Os03g52650	0.0629871	4.62186	-6.19727	0.0176881	down
LOC_Os03g53520	23.0669	53.4641	-1.21274	6.43569e-15	down
LOC_Os03g53550	5.07477	10.3186	-1.02383	7.57381e-05	down
LOC_Os03g53800	28.7523	65.0464	-1.17779	1.12041e-11	down
LOC_Os03g54000	6.11076	27.8327	-2.18736	5.02648e-37	down
LOC_Os03g54910	3.23961	8.02444	-1.30858	0.0386026	down
LOC_Os03g55290	28.8209	113.66	-1.97954	0.00389532	down
LOC_Os03g55350	7.81987	24.4447	-1.6443	5.59718e-09	down
LOC_Os03g55420	6.2475	13.7998	-1.1433	0.000307937	down
LOC_Os03g56070	0.0080616	0.777881	-6.59234	0.00401011	down
LOC_Os03g56270	4.22175	8.29719	-0.974783	0.00554948	down
LOC_Os03g56820	3.50426	8.85297	-1.33705	0.0244505	down
LOC_Os03g56944	10.042	32.9948	-1.71619	0.000585962	down
LOC_Os03g56950	5.5713	15.1037	-1.43882	1.16801e-12	down
LOC_Os03g57080	3.20988	12.3154	-1.93987	3.22655e-08	down
LOC_Os03g57780	1.71363	5.75582	-1.74796	0.0446765	down
LOC_Os03g57950	0.16096	0.601744	-1.90245	0.0457948	down
LOC_Os03g58110	8.35041	19.1715	-1.19905	9.25712e-06	down
LOC_Os03g58220	0.44415	2.54825	-2.52039	0.000144606	down
LOC_Os03g58230	78.3212	201.979	-1.36673	1.48056e-32	down
LOC_Os03g58320	0.239444	1.26127	-2.39711	0.00537286	down
LOC_Os03g58350	1.40477	7.73528	-2.46112	0.0245868	down
LOC_Os03g58420	0.194818	0.85214	-2.12896	0.0499464	down
LOC_Os03g58470	92.3445	188.278	-1.02777	1.65033e-11	down
LOC_Os03g58790	3.44047	7.45801	-1.11619	0.000166654	down
LOC_Os03g58870	0.18549	0.950284	-2.35701	0.0093985	down
LOC_Os03g58980	11.8285	24.179	-1.03148	0.00110688	down
LOC_Os03g59240	6.16132	12.362	-1.0046	6.14439e-05	down
LOC_Os03g59770	1.05538	3.42663	-1.69902	0.027962	down
LOC_Os03g60300	0.180728	1.53797	-3.08914	0.00483981	down
LOC_Os03g60720	14.5593	32.7806	-1.1709	0.0086096	down
LOC_Os03g60850	10.3428	27.4934	-1.41046	3.58326e-08	down
LOC_Os03g61670	2.46837	6.42346	-1.37979	0.0167943	down
LOC_Os03g61740	4.13123	23.5586	-2.51161	7.44685e-20	down
LOC_Os03g62090	11.247	26.2339	-1.22189	1.83673e-07	down
LOC_Os03g62314	0.130291	1.07971	-3.05083	0.00229137	down
LOC_Os03g62670	9.09555	115.256	-3.66353	5.21354e-108	down
LOC_Os03g62740	3.80974	13.7718	-1.85395	0.00500818	down
LOC_Os03g63330	1.17522	2.75923	-1.23134	0.000358963	down
LOC_Os03g63390	29.0566	62.6438	-1.10831	2.54704e-06	down
LOC_Os03g63700	32.7615	69.8669	-1.0926	1.4861e-10	down
LOC_Os03g63970	5.28346	14.4297	-1.44949	5.68851e-09	down
LOC_Os03g64130	0.776599	2.3361	-1.58886	0.00499384	down
LOC_Os03g64170	4.61842	26.6285	-2.5275	9.91006e-05	down
LOC_Os04g01500	7.46898	22.8501	-1.61322	5.22379e-06	down
LOC_Os04g01610	1.93425	3.66924	-0.923705	0.0377973	down
LOC_Os04g02050	28.001	81.2908	-1.53761	5.44105e-23	down
LOC_Os04g02520	0.0378821	0.570468	-3.91256	0.00104333	down
LOC_Os04g02580	3.05043	8.79746	-1.52808	0.000199222	down
LOC_Os04g02880	6.99842	31.0985	-2.15174	3.80105e-16	down
LOC_Os04g03050	0.381186	1.45888	-1.93629	2.33847e-06	down
LOC_Os04g04060	0.956936	2.42966	-1.34426	0.000204566	down
LOC_Os04g05050	11.9363	36.1511	-1.59869	1.42002e-09	down
LOC_Os04g05700	0.289808	0.761854	-1.39441	0.00537286	down
LOC_Os04g07110	1.0803	2.67343	-1.30726	0.00532906	down
LOC_Os04g08280	16.3958	44.3321	-1.43503	0.000260485	down
LOC_Os04g08350	15.3718	35.8186	-1.22042	7.82091e-18	down
LOC_Os04g08390	0.0919858	0.387221	-2.07367	0.000458726	down
LOC_Os04g09900	0.261755	1.16222	-2.15059	5.86113e-06	down
LOC_Os04g10000	1.49206	3.82973	-1.35994	0.0266586	down
LOC_Os04g10010	0.697158	3.80966	-2.4501	3.94997e-05	down
LOC_Os04g10160	0.487718	1.64168	-1.75105	0.00122758	down
LOC_Os04g11400	178.234	432.747	-1.27975	1.53061e-27	down
LOC_Os04g12060	3.07334	7.1952	-1.22723	5.75159e-09	down
LOC_Os04g12070	0.221553	0.962982	-2.11986	0.00063871	down
LOC_Os04g12460	0.205304	0.596596	-1.53899	0.000185558	down
LOC_Os04g13590	0.185664	0.788471	-2.08637	0.0284701	down
LOC_Os04g15690	8.56325	21.5162	-1.3292	4.22702e-10	down
LOC_Os04g20680	0.238646	0.577738	-1.27554	0.0370159	down
LOC_Os04g22120	1.13013	2.48086	-1.13435	0.0124421	down
LOC_Os04g22910	0.0735822	0.306944	-2.06055	0.00117546	down
LOC_Os04g24430	1.7765	5.01246	-1.49648	0.00177994	down
LOC_Os04g27020	0.668651	2.34527	-1.81043	0.00350165	down
LOC_Os04g27540	0.128611	0.400676	-1.63942	0.0457386	down
LOC_Os04g28280	1.07666	4.17652	-1.95573	0.00957498	down
LOC_Os04g28520	3.57147	15.7269	-2.13865	7.46034e-21	down
LOC_Os04g28780	0.221783	0.638429	-1.52537	0.00445167	down
LOC_Os04g29550	15.211	40.2601	-1.40424	6.9409e-07	down
LOC_Os04g29580	0.586923	1.1889	-1.01838	0.00380295	down
LOC_Os04g29680	1.56045	9.49285	-2.60488	1.09503e-83	down
LOC_Os04g29960	0.192059	0.719627	-1.9057	0.000692188	down
LOC_Os04g30030	2.22568	6.5589	-1.55921	8.96579e-07	down
LOC_Os04g30040	3.28817	16.8684	-2.35897	9.05639e-49	down
LOC_Os04g30800	4.85818	10.8303	-1.15659	0.00103525	down
LOC_Os04g31350	2.95318	10.4252	-1.81973	2.081e-08	down
LOC_Os04g31410	26.2477	74.4389	-1.50386	3.75438e-12	down
LOC_Os04g31484	3.86622	20.0052	-2.37138	0.00200285	down
LOC_Os04g31520	28.6486	91.1852	-1.67034	0.00780783	down
LOC_Os04g32030	12.6	27.6741	-1.13511	0.00264408	down
LOC_Os04g32540	1.76962	5.49012	-1.6334	2.02633e-07	down
LOC_Os04g32800	26.4121	86.3659	-1.70926	6.80122e-27	down
LOC_Os04g32920	5.7738	19.4436	-1.7517	8.67649e-25	down
LOC_Os04g33060	29.7095	62.5562	-1.07423	2.13822e-12	down
LOC_Os04g33600	1.70497	3.46639	-1.02369	0.0150544	down
LOC_Os04g33740	0.0393333	2.09031	-5.73182	3.28634e-07	down
LOC_Os04g33900	19.4657	41.5931	-1.09541	2.143e-06	down
LOC_Os04g33990	219.563	491.577	-1.16278	4.36247e-15	down
LOC_Os04g34170	13.5379	25.3531	-0.905157	0.0121349	down
LOC_Os04g34230	0.435919	1.7878	-2.03605	0.000279958	down
LOC_Os04g34270	0.849706	1.95405	-1.20143	0.000439866	down
LOC_Os04g35210	2.41794	2.55939	-0.082021	3.70969e-05	down
LOC_Os04g35520	31.078	66.3378	-1.09394	8.74382e-18	down
LOC_Os04g36070	1.99874	6.87628	-1.78253	1.46506e-09	down
LOC_Os04g36820	11.8737	23.8285	-1.00492	0.0440693	down
LOC_Os04g37480	2.31801	10.0833	-2.121	9.01364e-12	down
LOC_Os04g37770	6.48465	25.3542	-1.96713	0.0187042	down
LOC_Os04g37990	0.855625	2.45194	-1.51887	0.00553846	down
LOC_Os04g38410	410.998	787.188	-0.937577	5.64395e-17	down
LOC_Os04g38600	141.932	355.151	-1.32324	2.59847e-32	down
LOC_Os04g38810	0.480057	1.84575	-1.94293	0.0254642	down
LOC_Os04g38850	10.5938	21.8935	-1.04727	1.64885e-06	down
LOC_Os04g39150	214.257	584.744	-1.44847	0.00121595	down
LOC_Os04g39300	1.48995	6.46614	-2.11764	0.00117213	down
LOC_Os04g39320	9.91781	37.7388	-1.92795	1.30872e-08	down
LOC_Os04g39380	0.355681	3.51492	-3.30484	0.000317877	down
LOC_Os04g39610	0.756292	5.31982	-2.81436	0.00316386	down
LOC_Os04g39880	4.61134	9.71773	-1.07543	5.5179e-07	down
LOC_Os04g40410	7.0547	48.6512	-2.78582	1.79149e-10	down
LOC_Os04g40440	0.457611	0.98722	-1.10925	0.00925474	down
LOC_Os04g40510	1.98878	4.66971	-1.23145	0.0128396	down
LOC_Os04g40630	107.649	303.011	-1.49304	4.7694e-20	down
LOC_Os04g40940	0.302578	1.62939	-2.42895	0.000744819	down
LOC_Os04g41350	1.52446	4.27919	-1.48904	0.00485933	down
LOC_Os04g41810	10.8465	23.854	-1.137	0.0002038	down
LOC_Os04g41860	3.47487	7.8868	-1.18248	0.00710404	down
LOC_Os04g41900	0.18206	12.3988	-6.08964	0.00233252	down
LOC_Os04g42130	0.622821	1.34995	-1.11601	0.0403942	down
LOC_Os04g42520	6.12094	13.3259	-1.12241	0.000165146	down
LOC_Os04g42540	0.143806	2.55338	-4.15022	0.00444109	down
LOC_Os04g42620	24.7717	53.6246	-1.11421	7.60392e-15	down
LOC_Os04g42720	0.602789	1.85329	-1.62037	0.00140478	down
LOC_Os04g43230	0.143204	0.754517	-2.39748	0.0246453	down
LOC_Os04g44210	2.93362	6.86981	-1.22759	3.87013e-07	down
LOC_Os04g44240	0.347866	1.20202	-1.78885	0.0388412	down
LOC_Os04g44320	3.75208	10.9233	-1.54165	2.57082e-11	down
LOC_Os04g44354	1.90132	4.80418	-1.33729	0.000649659	down
LOC_Os04g44850	11.9031	25.7512	-1.1133	1.23236e-07	down
LOC_Os04g45000	7.10128	24.54	-1.78899	7.72414e-16	down
LOC_Os04g45340	0.177922	1.18496	-2.73552	0.00100291	down
LOC_Os04g45690	4.57142	13.8659	-1.60083	3.58093e-08	down
LOC_Os04g45720	1.71297	4.90268	-1.51707	0.0469129	down
LOC_Os04g45900	13.3714	26.1809	-0.969362	4.31481e-10	down
LOC_Os04g46110	19.8327	71.8203	-1.85651	2.22053e-08	down
LOC_Os04g46130	23.752	55.7976	-1.23216	8.10346e-08	down
LOC_Os04g46560	2.14511	6.23279	-1.53883	0.00215551	down
LOC_Os04g46730	10.2216	28.6731	-1.48808	0.000757251	down
LOC_Os04g46830	11.0451	66.1312	-2.58192	0.000568478	down
LOC_Os04g46990	1.6397	4.59619	-1.48701	0.000453601	down
LOC_Os04g47250	7.40071	18.7006	-1.33735	0.00586234	down
LOC_Os04g47300	2.15214	6.03931	-1.48861	9.00096e-08	down
LOC_Os04g47420	3.19283	20.9921	-2.71694	2.96462e-24	down
LOC_Os04g48416	4.39147	15.9688	-1.86248	0.034861	down
LOC_Os04g48830	2.43838	5.18526	-1.08849	0.0449467	down
LOC_Os04g48930	0.16849	4.85872	-4.84984	1.08077e-10	down
LOC_Os04g49490	0.582539	1.42577	-1.29131	0.00607219	down
LOC_Os04g49560	1.46402	3.52093	-1.26602	4.45777e-05	down
LOC_Os04g49650	4.61881	9.08029	-0.975216	0.0074566	down
LOC_Os04g49700	0.745494	1.85345	-1.31395	0.0145692	down
LOC_Os04g49950	0.197277	0.962938	-2.28722	8.87279e-07	down
LOC_Os04g50204	9.12684	19.8187	-1.11868	1.78936e-12	down
LOC_Os04g50960	0.0313129	0.852294	-4.76652	0.01787	down
LOC_Os04g51030	0.765575	1.71684	-1.16514	0.000988681	down
LOC_Os04g51040	0.956076	2.47255	-1.3708	3.79949e-05	down
LOC_Os04g51340	0.953235	5.84568	-2.61647	3.90809e-18	down
LOC_Os04g51460	1.53202	3.84718	-1.32837	0.0140025	down
LOC_Os04g51830	0.727652	1.44301	-0.987758	0.0227417	down
LOC_Os04g51980	1.4647	8.29104	-2.50094	0.00029601	down
LOC_Os04g51990	5.03603	10.5725	-1.06995	0.00737283	down
LOC_Os04g52250	3.93429	17.1177	-2.12131	0.000249508	down
LOC_Os04g52260	57.7439	211.574	-1.87342	1.12723e-45	down
LOC_Os04g52310	0.339315	1.69231	-2.3183	9.30606e-06	down
LOC_Os04g52320	6.19927	15.9228	-1.36093	1.27267e-08	down
LOC_Os04g52440	0.151148	0.515768	-1.77076	0.0217089	down
LOC_Os04g52780	0.153765	0.822836	-2.41987	0.000199261	down
LOC_Os04g52820	6.99297	18.5804	-1.40981	0.000518737	down
LOC_Os04g53180	38.7952	97.9702	-1.33646	2.54529e-11	down
LOC_Os04g53730	1.19843	3.66905	-1.61426	0.0316211	down
LOC_Os04g53860	1.27339	2.7915	-1.13237	0.022144	down
LOC_Os04g53950	2.03313	19.0196	-3.22571	0.00514497	down
LOC_Os04g54240	1.07501	10.1777	-3.24299	0.019721	down
LOC_Os04g54520	0.181049	0.383798	-1.08396	0.0171191	down
LOC_Os04g54810	7.59613	26.9293	-1.82584	1.33432e-05	down
LOC_Os04g54930	1.7179	6.60698	-1.94334	0.0371594	down
LOC_Os04g54940	1.32383	3.25022	-1.29582	0.0357997	down
LOC_Os04g55159	32.4004	143.376	-2.14572	1.93975e-22	down
LOC_Os04g55280	1.44331	2.84388	-0.978483	0.00855264	down
LOC_Os04g56170	3.75726	7.39204	-0.976292	0.000553372	down
LOC_Os04g56180	0.853865	5.48657	-2.68383	3.73092e-05	down
LOC_Os04g56390	4.24958	9.23805	-1.12027	0.00817767	down
LOC_Os04g57630	1.25432	2.80899	-1.16315	2.0478e-05	down
LOC_Os04g57650	1.429	3.68757	-1.36766	0.0319814	down
LOC_Os04g57720	1.34591	3.85519	-1.51821	0.00833552	down
LOC_Os04g58470	3.58135	7.39013	-1.0451	2.51949e-06	down
LOC_Os04g58860	25.9421	61.6208	-1.24812	4.79816e-18	down
LOC_Os04g59120	0.572765	2.49037	-2.12034	0.00243644	down
LOC_Os04g59150	3.29246	7.21359	-1.13155	0.001512	down
LOC_Os04g59200	0.380097	3.46389	-3.18796	0.000119231	down
LOC_Os04g59310	0.368993	2.36532	-2.68037	0.00759764	down
LOC_Os04g59330	36.9701	100.871	-1.44809	6.26554e-17	down
LOC_Os04g59370	0.738576	2.05924	-1.47929	0.0265227	down
LOC_Os04g59380	1.65569	3.43522	-1.05297	0.006871	down
LOC_Os05g01140	2.73282	9.42386	-1.78593	1.25526e-11	down
LOC_Os05g01730	2.42963	8.47561	-1.80258	3.34799e-08	down
LOC_Os05g01810	20.3773	55.4073	-1.44312	2.4947e-05	down
LOC_Os05g02250	47.6071	115.512	-1.27879	1.24626e-24	down
LOC_Os05g02310	24.0787	63.3423	-1.39541	2.48573e-05	down
LOC_Os05g02820	7.77471	16.2995	-1.06797	1.72548e-05	down
LOC_Os05g02890	7.18837	17.6347	-1.29468	1.61127e-07	down
LOC_Os05g02900	1.55421	4.64242	-1.57869	0.0498167	down
LOC_Os05g03440	1.50084	3.14302	-1.06638	0.0258708	down
LOC_Os05g03972	0.472686	3.83101	-3.01877	2.90661e-07	down
LOC_Os05g04020	2.00926	9.66904	-2.26671	6.04046e-05	down
LOC_Os05g04170	38.6009	88.5137	-1.19727	1.29318e-08	down
LOC_Os05g04380	102.829	223.678	-1.12118	2.0981e-20	down
LOC_Os05g04600	4.2585	9.83802	-1.20802	3.14425e-11	down
LOC_Os05g04820	2.48082	8.92195	-1.84654	3.26647e-10	down
LOC_Os05g05170	1.63122	4.62183	-1.50251	0.0297133	down
LOC_Os05g05670	3.05867	7.83143	-1.35637	0.000209958	down
LOC_Os05g05680	30.001	105.243	-1.81064	3.93542e-40	down
LOC_Os05g07420	0.121005	0.354534	-1.55086	0.0420716	down
LOC_Os05g07764	0.913485	3.55294	-1.95956	0.00107347	down
LOC_Os05g08480	2.24853	4.93726	-1.13473	0.0104599	down
LOC_Os05g08530	0.354818	1.85794	-2.38855	0.0470968	down
LOC_Os05g09704	32.4262	111.102	-1.77666	4.13784e-08	down
LOC_Os05g09724	0.582124	3.08321	-2.40504	2.55938e-05	down
LOC_Os05g09740	86.4836	215.068	-1.3143	0.000459215	down
LOC_Os05g10210	33.215	83.0664	-1.32243	4.92244e-09	down
LOC_Os05g10330	3.14959	16.509	-2.39001	4.05427e-05	down
LOC_Os05g10370	1.80943	8.14282	-2.17	0.00449421	down
LOC_Os05g10830	2.79936	8.15684	-1.54292	0.00609533	down
LOC_Os05g10840	0.337353	0.79674	-1.23985	0.0421962	down
LOC_Os05g11010	26.1777	49.191	-0.910053	2.21695e-06	down
LOC_Os05g11210	3.04112	27.8524	-3.19513	1.05667e-16	down
LOC_Os05g11300	2.25583	7.05342	-1.64466	0.000121334	down
LOC_Os05g11720	3.12994	6.69536	-1.09703	0.0486823	down
LOC_Os05g11910	14.0488	42.0377	-1.58124	2.66011e-07	down
LOC_Os05g11990	7.12077	16.2384	-1.18931	1.17438e-13	down
LOC_Os05g12580	0.177688	7.61908	-5.4222	7.34725e-14	down
LOC_Os05g13900	2.25327	4.49267	-0.995552	0.000958049	down
LOC_Os05g13940	30.5085	98.9206	-1.69706	6.38625e-37	down
LOC_Os05g14590	0.146684	0.8001	-2.44747	0.0434488	down
LOC_Os05g15850	2.4912	12.3919	-2.31448	4.0711e-08	down
LOC_Os05g17604	0.292686	0.636343	-1.12045	0.0189198	down
LOC_Os05g19030	4.22022	8.68849	-1.04179	0.00126492	down
LOC_Os05g19670	2.1317	8.82838	-2.05014	0.0252243	down
LOC_Os05g19910	2.6132	14.0258	-2.4242	2.76661e-07	down
LOC_Os05g25350	4.17134	13.0161	-1.64172	1.31643e-22	down
LOC_Os05g25430	0.696718	1.51482	-1.1205	0.00143911	down
LOC_Os05g25540	2.27505	5.14885	-1.17835	0.000266727	down
LOC_Os05g25770	50.2168	126.617	-1.33423	1.65189e-08	down
LOC_Os05g27820	8.19772	20.0177	-1.28798	0.0117661	down
LOC_Os05g28730	3.03918	6.9225	-1.18761	0.000185284	down
LOC_Os05g28780	0.994028	7.16628	-2.84986	0.00080413	down
LOC_Os05g30010	3.48959	9.59693	-1.45952	5.68731e-16	down
LOC_Os05g30500	5.77093	23.0869	-2.0002	2.30931e-11	down
LOC_Os05g30750	2.56265	6.34032	-1.30692	0.0020105	down
LOC_Os05g30820	0.8341	4.03619	-2.2747	1.50856e-09	down
LOC_Os05g31040	2.09119	6.48944	-1.63377	1.21817e-09	down
LOC_Os05g31280	2.14945	5.45167	-1.34273	0.00784668	down
LOC_Os05g32230	23.7835	51.0607	-1.10225	1.93865e-16	down
LOC_Os05g32440	1.18912	3.40371	-1.51722	0.0118203	down
LOC_Os05g32760	0.769938	2.78852	-1.85669	0.000998829	down
LOC_Os05g32860	7.22091	16.0218	-1.14978	0.00389675	down
LOC_Os05g33080	2.74939	8.56577	-1.63947	0.000369033	down
LOC_Os05g33690	4.94354	15.7572	-1.6724	1.13635e-05	down
LOC_Os05g33900	14.4619	46.7371	-1.69231	7.97564e-24	down
LOC_Os05g34010	3.59936	7.48109	-1.05551	2.06137e-05	down
LOC_Os05g34170	10.7495	28.4023	-1.40173	0.0312154	down
LOC_Os05g34320	1.3198	6.22211	-2.23708	2.23576e-07	down
LOC_Os05g34530	0.65018	2.29706	-1.82088	0.0381898	down
LOC_Os05g34854	2.31061	4.61882	-0.999248	0.0326632	down
LOC_Os05g35360	0.386014	0.529863	-0.456965	0.0209674	down
LOC_Os05g35380	0.364108	1.68886	-2.21361	0.00747474	down
LOC_Os05g35480	0.78974	1.92884	-1.28828	0.0106686	down
LOC_Os05g35910	1.49095	2.6631	-0.836879	0.0240719	down
LOC_Os05g35930	4.12247	13.8662	-1.74999	1.60899e-05	down
LOC_Os05g36050	10.4592	22.0597	-1.07664	0.00134148	down
LOC_Os05g37030	0.0344585	1.78027	-5.69109	0.000804862	down
LOC_Os05g37470	4.32702	11.1429	-1.36468	4.25255e-07	down
LOC_Os05g37600	3.67956	9.7833	-1.41079	0.000538626	down
LOC_Os05g38000	6.82586	25.6632	-1.91062	0.00342239	down
LOC_Os05g38390	0.158816	1.68881	-3.41058	1.62755e-06	down
LOC_Os05g38500	6.1391	11.9978	-0.966671	0.00406992	down
LOC_Os05g39840	1.74788	4.17438	-1.25596	6.80352e-05	down
LOC_Os05g39850	0.108558	0.825746	-2.92724	0.00554009	down
LOC_Os05g39990	1.65536	10.0512	-2.60215	0.000533817	down
LOC_Os05g40960	0.720707	4.72002	-2.71131	7.75336e-11	down
LOC_Os05g41390	0.0188968	1.30193	-6.10637	0.00871109	down
LOC_Os05g41670	3.89947	7.83666	-1.00696	0.00354063	down
LOC_Os05g41990	3.0477	24.0064	-2.97763	1.41897e-07	down
LOC_Os05g42120	4.50579	12.0913	-1.42412	3.24492e-05	down
LOC_Os05g42180	1.62977	3.97176	-1.28511	0.000610364	down
LOC_Os05g43140	0.192852	2.8339	-3.87722	1.14153e-05	down
LOC_Os05g43820	1.65879	5.77517	-1.79973	3.4719e-06	down
LOC_Os05g43870	0.668146	4.34688	-2.70175	1.12659e-06	down
LOC_Os05g43880	0.195055	1.53449	-2.97581	0.00232458	down
LOC_Os05g43940	0.958314	2.51542	-1.39223	0.0153431	down
LOC_Os05g44070	6.27986	15.3143	-1.28608	4.25163e-06	down
LOC_Os05g44200	1.79278	27.4902	-3.93865	8.77908e-08	down
LOC_Os05g44600	0.884567	5.47856	-2.63075	5.56007e-06	down
LOC_Os05g45240	0.394113	1.1104	-1.49439	0.00869981	down
LOC_Os05g46470	3.93863	8.44458	-1.10033	0.00375882	down
LOC_Os05g46550	3.13818	6.87416	-1.13126	0.000793224	down
LOC_Os05g47540	9.35431	44.1182	-2.23767	1.04074e-51	down
LOC_Os05g47680	1.64749	6.21271	-1.91495	0.000402159	down
LOC_Os05g48580	2.64051	5.66959	-1.10243	0.0467346	down
LOC_Os05g48890	9.84918	27.508	-1.48177	3.04355e-05	down
LOC_Os05g48900	187.404	404.956	-1.11161	3.7754e-10	down
LOC_Os05g49040	0.0790568	0.851359	-3.42881	1.76052e-05	down
LOC_Os05g49240	3.69667	146.587	-5.30939	3.7013e-95	down
LOC_Os05g50340	40.7983	303.376	-2.89453	2.00297e-65	down
LOC_Os05g50350	0	3.0246	#NUM!	2.81586e-10	down
LOC_Os05g50550	49.9159	104.626	-1.06766	3.13815e-17	down
LOC_Os05g50750	2.46437	7.82719	-1.66727	2.39838e-21	down
LOC_Os05g50800	13.3228	26.5129	-0.992795	4.92906e-06	down
LOC_Os05g50910	1.148	4.65946	-2.02104	9.04038e-05	down
LOC_Os05g50990	3.32699	6.78073	-1.02722	5.96886e-05	down
LOC_Os05g51160	4.34169	13.3042	-1.61556	5.33496e-08	down
LOC_Os05g51470	1.53601	3.41638	-1.15328	0.00131619	down
LOC_Os06g01490	0.486587	1.65685	-1.76767	0.0140047	down
LOC_Os06g01620	1.93673	10.3869	-2.42307	2.91866e-10	down
LOC_Os06g01760	5.44599	11.0713	-1.02355	5.24798e-05	down
LOC_Os06g01934	19.1444	39.0574	-1.02867	7.84833e-14	down
LOC_Os06g01966	1.73578	5.09985	-1.55487	5.10683e-07	down
LOC_Os06g01972	0.180633	2.58485	-3.83895	6.03698e-14	down
LOC_Os06g01990	7.28148	16.4516	-1.17593	0.000546794	down
LOC_Os06g02410	12.7825	31.7128	-1.3109	5.84876e-11	down
LOC_Os06g02630	2.41308	6.18763	-1.35851	2.5259e-05	down
LOC_Os06g02760	0.355645	1.18384	-1.73497	0.00497303	down
LOC_Os06g02780	16.2294	49.0509	-1.59567	1.46095e-07	down
LOC_Os06g02800	4.94236	9.50531	-0.943533	0.00492933	down
LOC_Os06g02810	4.22056	10.625	-1.33195	7.70176e-05	down
LOC_Os06g02830	4.65904	11.5731	-1.31267	1.50574e-09	down
LOC_Os06g02900	4.16784	16.6623	-1.99922	1.60392e-07	down
LOC_Os06g02960	2.91806	8.26058	-1.50123	3.82612e-07	down
LOC_Os06g03040	0.499235	2.71653	-2.44397	0.00538391	down
LOC_Os06g03220	3.7703	7.96487	-1.07897	0.00931252	down
LOC_Os06g03380	0.541433	2.55472	-2.23831	0.00188353	down
LOC_Os06g03580	10.821	24.9536	-1.20541	2.22187e-15	down
LOC_Os06g03890	1.23083	6.4587	-2.39161	6.90753e-10	down
LOC_Os06g04080	0.370325	1.27453	-1.7831	0.0417911	down
LOC_Os06g04200	1.28875	2.76217	-1.09983	0.000893513	down
LOC_Os06g04590	4.81207	34.9961	-2.86247	9.82893e-06	down
LOC_Os06g04850	2.32451	14.0616	-2.59677	0.00962116	down
LOC_Os06g04870	4.38138	19.859	-2.18033	0.00262366	down
LOC_Os06g05550	31.3985	67.5612	-1.1055	0.00726429	down
LOC_Os06g05930	272.951	572.143	-1.06773	5.75318e-12	down
LOC_Os06g06250	26.0441	127.087	-2.28678	1.05896e-11	down
LOC_Os06g06550	2.02924	4.53966	-1.16164	0.00873358	down
LOC_Os06g06960	1.2893	3.74701	-1.53915	4.3204e-09	down
LOC_Os06g07300	5.43229	14.051	-1.37104	2.29425e-07	down
LOC_Os06g07941	2.79537	8.3179	-1.57318	1.36967e-06	down
LOC_Os06g08100	5.56155	17.2954	-1.63683	1.16331e-05	down
LOC_Os06g08830	3.47334	10.7949	-1.63595	9.04658e-06	down
LOC_Os06g09340	3.87835	11.7466	-1.59873	5.60898e-07	down
LOC_Os06g11330	9.86461	25.278	-1.35755	5.47768e-13	down
LOC_Os06g11510	0.267833	1.71477	-2.67861	0.032033	down
LOC_Os06g11660	2.40715	6.45301	-1.42264	0.0010164	down
LOC_Os06g12280	5.71664	11.7957	-1.04503	1.9117e-05	down
LOC_Os06g12310	13.1937	41.8779	-1.66635	1.08323e-09	down
LOC_Os06g12320	13.8487	41.0079	-1.56615	2.3761e-15	down
LOC_Os06g12460	2.08885	4.06175	-0.959395	0.000214402	down
LOC_Os06g12740	8.54392	16.922	-0.985931	3.47786e-05	down
LOC_Os06g14630	1.34935	5.81694	-2.108	0.014608	down
LOC_Os06g14810	3.5277	16.2254	-2.20145	0.00443753	down
LOC_Os06g15610	10.1649	27.341	-1.42747	0.0442868	down
LOC_Os06g15730	0.75641	1.67053	-1.14306	0.000821852	down
LOC_Os06g16300	10.6497	32.9626	-1.63002	2.8773e-13	down
LOC_Os06g16640	4.11118	14.2905	-1.79743	2.88953e-09	down
LOC_Os06g17560	0.62214	5.72999	-3.20322	1.00802e-05	down
LOC_Os06g18930	1.80856	5.81573	-1.68512	4.04999e-06	down
LOC_Os06g18960	1.04739	2.3692	-1.1776	0.00131775	down
LOC_Os06g19530	2.88566	5.76267	-0.997836	0.0157232	down
LOC_Os06g19550	0.315787	2.63292	-3.05964	0.033401	down
LOC_Os06g20040	11.9104	23.3645	-0.972102	5.52526e-05	down
LOC_Os06g20150	0.254054	3.50498	-3.7862	2.31577e-07	down
LOC_Os06g20790	0.696895	1.16746	-0.744357	0.0031965	down
LOC_Os06g20900	1.60192	3.31881	-1.05086	0.0287432	down
LOC_Os06g21250	6.59131	30.248	-2.1982	2.82489e-18	down
LOC_Os06g21570	0.728839	1.61207	-1.14524	0.00112594	down
LOC_Os06g22050	0.444644	2.76156	-2.63476	2.64797e-05	down
LOC_Os06g22870	141.495	270.81	-0.936534	9.0977e-18	down
LOC_Os06g23114	2.89474	4.90997	-0.762282	0.00414141	down
LOC_Os06g25950	1.45063	4.2364	-1.54616	0.00241867	down
LOC_Os06g28000	0.532069	3.84011	-2.85146	4.41245e-05	down
LOC_Os06g28480	4.53312	8.93852	-0.979533	0.000423992	down
LOC_Os06g28630	7.14593	16.5407	-1.21083	3.96034e-10	down
LOC_Os06g29730	4.50802	35.8302	-2.99061	0.000309316	down
LOC_Os06g30210	2.82196	8.17868	-1.53517	0.0352806	down
LOC_Os06g33170	4.90946	9.66091	-0.976593	0.0124456	down
LOC_Os06g34120	70.5884	141.127	-0.999489	2.39526e-10	down
LOC_Os06g34730	6.56215	15.9574	-1.28199	0.000613287	down
LOC_Os06g35200	1.89573	4.24159	-1.16185	0.00180803	down
LOC_Os06g35970	69.1901	167.37	-1.27441	0.00412761	down
LOC_Os06g36050	5.64283	14.6295	-1.37439	5.99271e-08	down
LOC_Os06g36450	0.916471	2.05525	-1.16515	0.0358713	down
LOC_Os06g36560	5.78081	13.4115	-1.21412	2.27022e-09	down
LOC_Os06g36810	8.68986	25.4958	-1.55285	0.00186522	down
LOC_Os06g37080	4.31606	9.38472	-1.1206	5.71238e-05	down
LOC_Os06g38120	2.90669	6.54505	-1.17103	0.0252157	down
LOC_Os06g38950	0.237455	0.518887	-1.12777	0.0420854	down
LOC_Os06g38970	4.05081	9.78848	-1.27288	3.41757e-13	down
LOC_Os06g38980	1.13467	3.36556	-1.56858	4.64596e-07	down
LOC_Os06g39110	10.5655	42.0774	-1.99369	6.18199e-07	down
LOC_Os06g39120	11.1325	58.9684	-2.40516	4.48679e-11	down
LOC_Os06g39230	4.6373	13.31	-1.52116	3.17697e-10	down
LOC_Os06g39712	0.920485	2.43385	-1.40277	0.048304	down
LOC_Os06g39780	1.16109	3.33369	-1.52164	0.00164692	down
LOC_Os06g39880	3.2752	12.5335	-1.93613	3.75367e-12	down
LOC_Os06g39960	1.97944	4.15426	-1.0695	0.00459847	down
LOC_Os06g40150	8.97778	25.3347	-1.49668	4.62251e-05	down
LOC_Os06g40170	0.77597	2.70914	-1.80376	0.0013223	down
LOC_Os06g40180	1.85077	4.92833	-1.41297	1.87954e-05	down
LOC_Os06g40500	18.7722	42.7074	-1.18589	0.00302151	down
LOC_Os06g40818	2.31654	4.71004	-1.02377	0.0173603	down
LOC_Os06g41090	0.101288	0.894872	-3.14322	0.000706435	down
LOC_Os06g41700	1.46752	4.89992	-1.73938	6.96216e-05	down
LOC_Os06g41910	7.02708	15.0529	-1.09905	5.4717e-06	down
LOC_Os06g43044	1.92793	12.4443	-2.69037	2.11452e-12	down
LOC_Os06g43170	4.49589	11.1834	-1.31468	0.000335732	down
LOC_Os06g43350	7.30944	18.8826	-1.36923	7.60636e-07	down
LOC_Os06g43600	1.91549	13.761	-2.8448	0.01609	down
LOC_Os06g43770	0.370604	2.57295	-2.79547	0.00114339	down
LOC_Os06g43860	158.423	342.16	-1.11088	1.50577e-20	down
LOC_Os06g44300	0.495019	1.75231	-1.8237	0.000641487	down
LOC_Os06g44310	5.82439	15.0059	-1.36535	0.0112637	down
LOC_Os06g44320	0.62057	1.89395	-1.60973	0.0209449	down
LOC_Os06g44930	2.59545	8.69585	-1.74434	0.00481476	down
LOC_Os06g45580	1.57105	4.97235	-1.6622	0.0303827	down
LOC_Os06g45690	0.381449	0.780781	-1.03343	0.0106461	down
LOC_Os06g45990	1.01686	4.45496	-2.13129	0.000736294	down
LOC_Os06g46340	0.95777	2.12496	-1.14969	0.0204232	down
LOC_Os06g46500	0.908656	5.57722	-2.61774	0.00142014	down
LOC_Os06g46680	9.62862	31.0903	-1.69106	0.00303081	down
LOC_Os06g46799	63.9697	125.678	-0.974268	6.86224e-14	down
LOC_Os06g47250	0.310866	0.640881	-1.04376	0.0366273	down
LOC_Os06g47770	1.15815	3.28583	-1.50443	0.0192716	down
LOC_Os06g48030	1.40902	16.7022	-3.56728	1.64616e-13	down
LOC_Os06g48160	7.94238	62.939	-2.98631	0.000112419	down
LOC_Os06g48180	4.73343	12.7133	-1.42539	6.25612e-06	down
LOC_Os06g48560	5.92531	15.1274	-1.3522	7.87107e-07	down
LOC_Os06g49100	2.35774	8.86668	-1.91099	0.0200483	down
LOC_Os06g49220	5.8486	16.2996	-1.47868	5.55074e-10	down
LOC_Os06g50900	0.544151	3.10026	-2.51031	6.9724e-05	down
LOC_Os06g50950	3.85979	14.2706	-1.88646	0.0478766	down
LOC_Os06g51110	0.013041	0.57857	-5.47137	0.00218765	down
LOC_Os07g01070	0.456195	1.74429	-1.93492	0.0104936	down
LOC_Os07g01110	0.881906	5.18051	-2.5544	4.13876e-06	down
LOC_Os07g01180	0.434885	2.11896	-2.28465	0.000225122	down
LOC_Os07g01530	1.34324	5.8897	-2.13248	8.61872e-08	down
LOC_Os07g01860	2.17494	5.42181	-1.3178	0.000556774	down
LOC_Os07g02100	4.9055	12.6	-1.36096	6.34189e-09	down
LOC_Os07g02120	6.15562	13.0294	-1.0818	4.79777e-06	down
LOC_Os07g02140	2.31613	7.89013	-1.76833	0.000138088	down
LOC_Os07g02150	1.00186	3.56641	-1.83179	3.30134e-05	down
LOC_Os07g02200	20.1971	56.0193	-1.47178	0.00719226	down
LOC_Os07g02440	0.498509	1.82287	-1.87052	0.00153225	down
LOC_Os07g02540	10.598	22.4798	-1.08484	0.000954273	down
LOC_Os07g02780	0.322294	0.883328	-1.45457	0.000770802	down
LOC_Os07g02810	0.819157	10.3292	-3.65644	4.74127e-06	down
LOC_Os07g03120	3.46822	7.0262	-1.01855	0.0429504	down
LOC_Os07g03150	0.679997	1.56563	-1.20315	0.0465997	down
LOC_Os07g03170	2.03027	6.33899	-1.64258	0.00628741	down
LOC_Os07g03870	1.59254	4.36267	-1.45388	1.35813e-09	down
LOC_Os07g04150	3.85543	17.6557	-2.19517	2.9387e-11	down
LOC_Os07g04180	30.9542	70.2036	-1.18141	1.72913e-20	down
LOC_Os07g04190	3.43837	7.03077	-1.03196	2.76067e-06	down
LOC_Os07g04730	1.04998	2.16483	-1.04389	0.00948979	down
LOC_Os07g04930	10.4164	20.4423	-0.972699	0.0178606	down
LOC_Os07g04950	3.04384	11.5316	-1.92163	0.031927	down
LOC_Os07g04960	1.85942	10.8926	-2.55043	1.76791e-06	down
LOC_Os07g05110	1.91906	6.61521	-1.78539	0.0327218	down
LOC_Os07g05190	0.306843	2.67115	-3.12189	0.016758	down
LOC_Os07g05460	0.592925	3.66854	-2.62928	6.96216e-05	down
LOC_Os07g05740	0.690584	1.54353	-1.16035	0.00109012	down
LOC_Os07g06470	5.60626	13.7998	-1.29953	7.20548e-06	down
LOC_Os07g06570	1.16688	3.36576	-1.52827	0.00207524	down
LOC_Os07g06620	2.82442	6.6774	-1.24133	0.00011474	down
LOC_Os07g06860	1.55706	11.6869	-2.908	8.38595e-14	down
LOC_Os07g07230	8.46962	17.9252	-1.08162	4.75637e-14	down
LOC_Os07g07900	1.19373	2.77771	-1.21842	0.0029583	down
LOC_Os07g07990	9.41735	30.3399	-1.68782	6.03873e-05	down
LOC_Os07g08350	0.20053	1.70814	-3.09054	1.16525e-05	down
LOC_Os07g08710	58.8027	158.211	-1.4279	2.39761e-24	down
LOC_Os07g09190	1.93603	4.39928	-1.18416	0.000116557	down
LOC_Os07g10530	2.98271	12.9345	-2.11652	0.000126814	down
LOC_Os07g10910	0.115431	0.490919	-2.08845	7.87802e-05	down
LOC_Os07g12100	0.173547	2.37556	-3.77487	4.84426e-05	down
LOC_Os07g13634	2.20547	5.0876	-1.2059	0.000358096	down
LOC_Os07g14740	0.753192	3.58579	-2.2512	0.000104863	down
LOC_Os07g14850	18.7307	38.5016	-1.03951	2.726e-11	down
LOC_Os07g15370	0.304524	5.70625	-4.22792	2.59564e-06	down
LOC_Os07g17970	3.61324	8.60317	-1.25157	8.68473e-06	down
LOC_Os07g18230	2.00675	7.06902	-1.81665	6.48063e-16	down
LOC_Os07g18240	3.65389	8.61149	-1.23683	1.69668e-08	down
LOC_Os07g18750	1.26058	6.22984	-2.3051	0.000157679	down
LOC_Os07g18990	12.3872	41.8682	-1.757	4.22323e-06	down
LOC_Os07g22930	32.8302	70.7977	-1.10868	2.46211e-20	down
LOC_Os07g25810	3.15448	17.4666	-2.46913	0.000124981	down
LOC_Os07g26630	0.809891	3.12738	-1.94916	0.00217326	down
LOC_Os07g27650	4.51949	6.9479	-0.620418	0.00952894	down
LOC_Os07g28890	0.964665	1.93379	-1.00333	0.0293069	down
LOC_Os07g29430	1.08498	4.93708	-2.18599	0.00332121	down
LOC_Os07g29950	0.676299	2.15438	-1.67154	0.0383406	down
LOC_Os07g29960	0.769998	2.17439	-1.49768	0.0493865	down
LOC_Os07g30610	4.53221	9.47414	-1.06378	0.00172113	down
LOC_Os07g30620	7.96501	18.6403	-1.22668	5.78728e-06	down
LOC_Os07g31500	1.87103	6.93697	-1.89047	1.10715e-10	down
LOC_Os07g31840	1.82514	3.98665	-1.12717	0.0154576	down
LOC_Os07g31960	1.06304	4.85267	-2.19058	0.0201984	down
LOC_Os07g32630	29.929	57.8199	-0.950021	0.00652841	down
LOC_Os07g32660	0.770297	3.21197	-2.05997	0.0497199	down
LOC_Os07g32680	0.786493	1.92415	-1.29071	0.0255543	down
LOC_Os07g33350	19.549	67.3123	-1.78378	1.43018e-17	down
LOC_Os07g33440	1.08166	2.30348	-1.09057	0.0498948	down
LOC_Os07g33620	0.549397	1.77685	-1.6934	0.0204232	down
LOC_Os07g34020	6.43098	16.548	-1.36354	5.53815e-09	down
LOC_Os07g34040	0.749194	3.10899	-2.05304	0.0323871	down
LOC_Os07g34070	0.407009	2.38604	-2.55149	3.60907e-05	down
LOC_Os07g34260	2.99499	17.5394	-2.54997	0.0455408	down
LOC_Os07g34650	26.43	70.0709	-1.40664	6.83171e-19	down
LOC_Os07g34720	0.65344	4.15283	-2.66797	0.000117108	down
LOC_Os07g34850	0.61799	3.44315	-2.47807	4.83852e-06	down
LOC_Os07g34980	0.524267	1.33594	-1.34948	0.000828884	down
LOC_Os07g35004	3.68023	11.7227	-1.67144	1.25578e-12	down
LOC_Os07g35520	0.609536	6.84458	-3.48918	9.13513e-08	down
LOC_Os07g35560	0.553101	3.19948	-2.53222	1.81758e-05	down
LOC_Os07g35630	0.678524	2.87017	-2.08066	1.18919e-08	down
LOC_Os07g35730	1.62866	3.40388	-1.06349	0.00104333	down
LOC_Os07g35750	0.0433552	0.323404	-2.89906	3.98449e-06	down
LOC_Os07g35880	1.66492	3.72846	-1.16312	0.0125769	down
LOC_Os07g36210	19.2527	44.1315	-1.19675	0.000285271	down
LOC_Os07g36630	2.296	5.82687	-1.3436	2.34071e-08	down
LOC_Os07g36690	0.304712	0.987223	-1.69593	0.0396778	down
LOC_Os07g37156	5.31263	10.6407	-1.0021	0.0190118	down
[truncated: 521 more rows]

## Sheet: Sheet 2, ZH11_GO enrichment
Sheet 2. GO enrichment of all DEGs in ZH11.
GO_ID	GO_term	ontology	Items	p_adj	pvalue	MSU Locus
GO:0050832	defense response to fungus	Biological Process	160	0	0	LOC_Os12g34524;LOC_Os05g34830;LOC_Os03g52650;LOC_Os06g43600;LOC_Os04g46830;LOC_Os03g18960;LOC_Os04g14690;LOC_Os07g48450;LOC_Os11g43980;LOC_Os12g03150;LOC_Os08g05520;LOC_Os01g02600;LOC_Os10g42130;LOC_Os04g59370;LOC_Os03g21710;LOC_Os03g45450;LOC_Os06g07220;LOC_Os05g25350;LOC_Os01g65550;LOC_Os07g18240;LOC_Os05g25260;LOC_Os03g25550;LOC_Os07g42510;LOC_Os06g11660;LOC_Os03g53910;LOC_Os01g72460;LOC_Os01g…
GO:0055114	oxidation-reduction process	Biological Process	214	0	0	LOC_Os01g01650;LOC_Os06g44260;LOC_Os02g04170;LOC_Os07g45000;LOC_Os02g54254;LOC_Os09g08720;LOC_Os02g42660;LOC_Os03g55380;LOC_Os08g34720;LOC_Os04g53180;LOC_Os07g01110;LOC_Os02g14440;LOC_Os10g33250;LOC_Os02g56920;LOC_Os08g35860;LOC_Os06g43350;LOC_Os06g37150;LOC_Os04g47250;LOC_Os01g61610;LOC_Os07g02810;LOC_Os03g39650;LOC_Os12g15530;LOC_Os06g30179;LOC_Os04g45720;LOC_Os04g57550;LOC_Os09g08990;LOC_Os06g…
GO:0010363	regulation of plant-type hypersensitive response	Biological Process	137	0	0	LOC_Os03g01300;LOC_Os12g35610;LOC_Os07g28890;LOC_Os06g11330;LOC_Os01g41200;LOC_Os03g02920;LOC_Os12g04500;LOC_Os02g51890;LOC_Os03g50960;LOC_Os06g14670;LOC_Os01g02790;LOC_Os08g36320;LOC_Os01g02570;LOC_Os02g51900;LOC_Os10g25030;LOC_Os12g08090;LOC_Os12g09300;LOC_Os01g42410;LOC_Os12g32850;LOC_Os01g11160;LOC_Os01g08260;LOC_Os08g39830;LOC_Os02g12890;LOC_Os05g42180;LOC_Os04g08280;LOC_Os01g36460;LOC_Os02g…
GO:0046688	response to copper ion	Biological Process	26	0	0	LOC_Os05g10210;LOC_Os03g12530;LOC_Os01g62490;LOC_Os11g48060;LOC_Os02g55134;LOC_Os03g15960;LOC_Os01g04370;LOC_Os05g09704;LOC_Os01g04380;LOC_Os01g03914;LOC_Os01g63180;LOC_Os03g16020;LOC_Os05g09740;LOC_Os07g46990;LOC_Os05g09724;LOC_Os12g15530;LOC_Os11g42220;LOC_Os05g38390;LOC_Os03g16610;LOC_Os01g62600;LOC_Os03g16030;LOC_Os01g08860;LOC_Os02g54140;LOC_Os01g04360;LOC_Os12g01730;LOC_Os07g01110
GO:0009611	response to wounding	Biological Process	140	0	0	LOC_Os12g07640;LOC_Os05g02390;LOC_Os11g35400;LOC_Os02g36890;LOC_Os04g57550;LOC_Os09g17630;LOC_Os10g02100;LOC_Os03g60850;LOC_Os11g03440;LOC_Os01g09830;LOC_Os04g33740;LOC_Os05g04820;LOC_Os12g37690;LOC_Os01g57770;LOC_Os03g58110;LOC_Os03g25550;LOC_Os11g29900;LOC_Os01g63540;LOC_Os10g42130;LOC_Os04g44850;LOC_Os04g51460;LOC_Os08g05520;LOC_Os12g03150;LOC_Os07g48450;LOC_Os03g52650;LOC_Os04g28570;LOC_Os02g…
GO:0009409	response to cold	Biological Process	168	0	0	LOC_Os12g43510;LOC_Os02g54060;LOC_Os06g46799;LOC_Os02g15750;LOC_Os01g20860;LOC_Os04g53860;LOC_Os02g43330;LOC_Os01g07376;LOC_Os11g38860;LOC_Os03g41390;LOC_Os08g31580;LOC_Os12g04360;LOC_Os10g39170;LOC_Os05g03130;LOC_Os03g28330;LOC_Os03g59770;LOC_Os03g16170;LOC_Os02g18410;LOC_Os08g39830;LOC_Os12g42280;LOC_Os01g60340;LOC_Os07g36690;LOC_Os01g34560;LOC_Os01g64110;LOC_Os04g56180;LOC_Os06g29180;LOC_Os01g…
GO:0010106	cellular response to iron ion starvation	Biological Process	59	0	0	LOC_Os03g11734;LOC_Os07g01180;LOC_Os03g02920;LOC_Os06g20150;LOC_Os01g74450;LOC_Os07g34020;LOC_Os09g32964;LOC_Os07g42924;LOC_Os06g48030;LOC_Os07g18230;LOC_Os12g35610;LOC_Os03g58420;LOC_Os02g13870;LOC_Os12g01730;LOC_Os05g05670;LOC_Os08g35760;LOC_Os11g38870;LOC_Os04g55850;LOC_Os05g12580;LOC_Os07g03870;LOC_Os10g36924;LOC_Os12g37840;LOC_Os07g26630;LOC_Os01g63180;LOC_Os05g19670;LOC_Os01g22230;LOC_Os05g…
GO:0016132	brassinosteroid biosynthetic process	Biological Process	53	0	0	LOC_Os01g63770;LOC_Os04g55850;LOC_Os05g12580;LOC_Os08g43120;LOC_Os01g39830;LOC_Os09g08720;LOC_Os12g03110;LOC_Os05g50550;LOC_Os06g22060;LOC_Os03g59040;LOC_Os02g51890;LOC_Os09g31522;LOC_Os01g22230;LOC_Os05g05680;LOC_Os01g16450;LOC_Os11g06820;LOC_Os01g42294;LOC_Os01g55940;LOC_Os07g40290;LOC_Os03g02920;LOC_Os06g20150;LOC_Os03g17760;LOC_Os08g39270;LOC_Os07g42924;LOC_Os04g41810;LOC_Os02g51750;LOC_Os03g…
GO:0009651	response to salt stress	Biological Process	236	0	0	LOC_Os06g39230;LOC_Os05g38500;LOC_Os03g55290;LOC_Os06g22870;LOC_Os01g46970;LOC_Os07g48680;LOC_Os02g01590;LOC_Os04g28570;LOC_Os01g53420;LOC_Os06g43600;LOC_Os02g01210;LOC_Os05g40960;LOC_Os03g15890;LOC_Os04g46830;LOC_Os02g55890;LOC_Os02g51060;LOC_Os10g38470;LOC_Os07g43950;LOC_Os03g41060;LOC_Os01g64730;LOC_Os04g08350;LOC_Os12g03150;LOC_Os12g10660;LOC_Os08g05520;LOC_Os07g04180;LOC_Os06g07220;LOC_Os01g…
GO:0006826	iron ion transport	Biological Process	64	0	0	LOC_Os05g41990;LOC_Os08g10310;LOC_Os11g01530;LOC_Os07g35730;LOC_Os01g50900;LOC_Os12g16220;LOC_Os02g01590;LOC_Os10g39170;LOC_Os12g34524;LOC_Os04g52310;LOC_Os11g43980;LOC_Os06g46799;LOC_Os04g45900;LOC_Os08g35210;LOC_Os03g55420;LOC_Os12g15530;LOC_Os08g02070;LOC_Os01g08020;LOC_Os07g02440;LOC_Os04g44320;LOC_Os02g51110;LOC_Os09g25070;LOC_Os02g02460;LOC_Os04g56180;LOC_Os02g34600;LOC_Os12g26290;LOC_Os06g…
GO:0046686	response to cadmium ion	Biological Process	172	0	0	LOC_Os07g14850;LOC_Os01g12660;LOC_Os10g38710;LOC_Os11g03440;LOC_Os06g39875;LOC_Os01g66740;LOC_Os12g07640;LOC_Os02g36890;LOC_Os01g74450;LOC_Os01g49720;LOC_Os06g11610;LOC_Os01g72460;LOC_Os12g37690;LOC_Os09g37910;LOC_Os03g25550;LOC_Os10g38360;LOC_Os05g44070;LOC_Os05g04820;LOC_Os06g22060;LOC_Os02g31030;LOC_Os01g16650;LOC_Os06g51260;LOC_Os08g43490;LOC_Os03g21960;LOC_Os04g59370;LOC_Os12g10660;LOC_Os08g…
GO:0006612	protein targeting to membrane	Biological Process	128	0	0	LOC_Os01g66490;LOC_Os12g39120;LOC_Os10g40420;LOC_Os05g41990;LOC_Os09g19710;LOC_Os03g21030;LOC_Os11g10460;LOC_Os12g33070;LOC_Os05g25770;LOC_Os01g52260;LOC_Os01g47760;LOC_Os09g32470;LOC_Os01g54030;LOC_Os11g03300;LOC_Os08g07890;LOC_Os07g18230;LOC_Os01g02560;LOC_Os01g55940;LOC_Os12g03040;LOC_Os07g40290;LOC_Os04g08280;LOC_Os03g08930;LOC_Os02g15750;LOC_Os01g36460;LOC_Os01g20860;LOC_Os07g49390;LOC_Os01g…
GO:0010167	response to nitrate	Biological Process	96	0	0	LOC_Os08g35760;LOC_Os06g15370;LOC_Os05g05670;LOC_Os12g01730;LOC_Os02g13870;LOC_Os03g58420;LOC_Os12g35610;LOC_Os03g44810;LOC_Os07g18230;LOC_Os06g48030;LOC_Os01g43460;LOC_Os03g01300;LOC_Os07g42924;LOC_Os09g32964;LOC_Os06g06960;LOC_Os07g34020;LOC_Os01g74450;LOC_Os06g20150;LOC_Os03g02920;LOC_Os04g37990;LOC_Os07g01180;LOC_Os07g08350;LOC_Os03g11734;LOC_Os07g01110;LOC_Os12g39220;LOC_Os01g16450;LOC_Os05g…
GO:0009751	response to salicylic acid	Biological Process	83	0	0	LOC_Os07g01070;LOC_Os07g35004;LOC_Os08g28710;LOC_Os11g02350;LOC_Os05g51630;LOC_Os02g40440;LOC_Os02g42620;LOC_Os04g42950;LOC_Os01g45090;LOC_Os04g29680;LOC_Os06g49220;LOC_Os04g40630;LOC_Os04g51040;LOC_Os01g26300;LOC_Os07g48870;LOC_Os08g33660;LOC_Os10g32580;LOC_Os07g06470;LOC_Os09g25070;LOC_Os12g09770;LOC_Os08g02990;LOC_Os07g35630;LOC_Os05g37060;LOC_Os03g04570;LOC_Os01g66890;LOC_Os04g29960;LOC_Os05g…
GO:0015706	nitrate transport	Biological Process	91	0	0	LOC_Os06g07220;LOC_Os02g51110;LOC_Os09g25070;LOC_Os01g28840;LOC_Os11g10460;LOC_Os07g02440;LOC_Os10g40600;LOC_Os01g25484;LOC_Os04g40410;LOC_Os12g26290;LOC_Os06g12310;LOC_Os04g56180;LOC_Os02g34600;LOC_Os12g32850;LOC_Os03g58980;LOC_Os01g47400;LOC_Os03g48780;LOC_Os07g18240;LOC_Os11g05740;LOC_Os01g50820;LOC_Os07g01070;LOC_Os01g50900;LOC_Os07g35730;LOC_Os10g40420;LOC_Os12g16220;LOC_Os02g01590;LOC_Os08g…
GO:1901700	response to oxygen-containing compound	Biological Process	130	0	0	LOC_Os04g59150;LOC_Os06g02780;LOC_Os03g38470;LOC_Os03g04250;LOC_Os06g09340;LOC_Os10g05490;LOC_Os04g39320;LOC_Os02g35490;LOC_Os05g01140;LOC_Os12g43720;LOC_Os04g33990;LOC_Os01g08220;LOC_Os07g34980;LOC_Os07g37400;LOC_Os07g05740;LOC_Os07g34850;LOC_Os03g08970;LOC_Os01g72510;LOC_Os01g67360;LOC_Os09g25570;LOC_Os02g13520;LOC_Os07g40690;LOC_Os01g68720;LOC_Os11g08200;LOC_Os01g27230;LOC_Os01g72210;LOC_Os07g…
GO:0009414	response to water deprivation	Biological Process	199	0	0	LOC_Os04g57440;LOC_Os06g03670;LOC_Os03g27370;LOC_Os03g41390;LOC_Os04g53860;LOC_Os08g04560;LOC_Os06g07030;LOC_Os04g10010;LOC_Os03g58350;LOC_Os04g49980;LOC_Os01g42410;LOC_Os01g04710;LOC_Os02g34600;LOC_Os07g46930;LOC_Os01g08260;LOC_Os10g40600;LOC_Os07g36690;LOC_Os11g01570;LOC_Os12g42280;LOC_Os08g10080;LOC_Os08g39830;LOC_Os02g18410;LOC_Os03g16170;LOC_Os03g60300;LOC_Os06g14670;LOC_Os02g51890;LOC_Os03g…
GO:0006598	polyamine catabolic process	Biological Process	38	1.39652e-09	8.09575e-13	LOC_Os02g49986;LOC_Os02g36890;LOC_Os04g57550;LOC_Os01g74450;LOC_Os02g47790;LOC_Os12g07640;LOC_Os01g25540;LOC_Os01g41200;LOC_Os04g42950;LOC_Os07g08350;LOC_Os12g37970;LOC_Os01g45090;LOC_Os08g05520;LOC_Os12g03150;LOC_Os11g03440;LOC_Os02g12730;LOC_Os01g28840;LOC_Os12g33070;LOC_Os01g43460;LOC_Os08g33660;LOC_Os05g04820;LOC_Os03g59040;LOC_Os11g26880;LOC_Os03g06940;LOC_Os01g36460;LOC_Os01g65370;LOC_Os01g…
GO:0042398	cellular modified amino acid biosynthetic process	Biological Process	38	1.39652e-09	8.09575e-13	LOC_Os01g39830;LOC_Os01g65370;LOC_Os01g36460;LOC_Os03g06940;LOC_Os11g26880;LOC_Os03g59040;LOC_Os05g04820;LOC_Os02g01590;LOC_Os01g25560;LOC_Os02g44940;LOC_Os01g51260;LOC_Os03g25550;LOC_Os11g07680;LOC_Os09g23620;LOC_Os07g37210;LOC_Os12g37690;LOC_Os05g47540;LOC_Os06g14670;LOC_Os07g08350;LOC_Os04g42950;LOC_Os01g41200;LOC_Os01g25540;LOC_Os12g07640;LOC_Os02g47790;LOC_Os01g74450;LOC_Os04g57550;LOC_Os02g…
GO:0009737	response to abscisic acid	Biological Process	190	2.46267e-09	1.42764e-12	LOC_Os01g04710;LOC_Os10g40600;LOC_Os05g45100;LOC_Os12g42280;LOC_Os04g30040;LOC_Os06g30370;LOC_Os10g17960;LOC_Os05g03130;LOC_Os01g64360;LOC_Os05g49170;LOC_Os03g27370;LOC_Os05g38150;LOC_Os03g41390;LOC_Os11g38860;LOC_Os05g49440;LOC_Os04g53860;LOC_Os01g36460;LOC_Os04g49980;LOC_Os08g35210;LOC_Os03g40100;LOC_Os12g41110;LOC_Os09g26880;LOC_Os07g05940;LOC_Os03g01300;LOC_Os01g40870;LOC_Os03g48310;LOC_Os01g…
GO:0042538	hyperosmotic salinity response	Biological Process	107	3.14867e-09	1.82532e-12	LOC_Os09g27050;LOC_Os03g60080;LOC_Os12g37970;LOC_Os01g52780;LOC_Os12g24800;LOC_Os07g48630;LOC_Os01g62760;LOC_Os06g15370;LOC_Os03g43440;LOC_Os03g44380;LOC_Os06g23684;LOC_Os11g03300;LOC_Os12g03040;LOC_Os12g39400;LOC_Os02g47790;LOC_Os05g44200;LOC_Os01g63930;LOC_Os03g08460;LOC_Os03g20090;LOC_Os06g14630;LOC_Os12g07030;LOC_Os05g04700;LOC_Os01g47760;LOC_Os03g21060;LOC_Os11g45740;LOC_Os02g58720;LOC_Os03g…
GO:0048767	root hair elongation	Biological Process	85	8.09853e-09	4.6948e-12	LOC_Os07g32660;LOC_Os01g39830;LOC_Os05g04600;LOC_Os06g01490;LOC_Os01g63770;LOC_Os07g48160;LOC_Os07g26630;LOC_Os04g59540;LOC_Os01g54030;LOC_Os02g44940;LOC_Os02g53130;LOC_Os05g41670;LOC_Os05g37600;LOC_Os07g41320;LOC_Os01g44110;LOC_Os07g36630;LOC_Os03g56270;LOC_Os08g07890;LOC_Os02g35970;LOC_Os07g04190;LOC_Os03g04770;LOC_Os10g36390;LOC_Os06g14810;LOC_Os12g06270;LOC_Os05g43820;LOC_Os09g07350;LOC_Os03g…
GO:0006979	response to oxidative stress	Biological Process	84	1.04601e-08	6.06382e-12	LOC_Os04g59150;LOC_Os03g61670;LOC_Os02g18540;LOC_Os03g55420;LOC_Os03g38170;LOC_Os06g40180;LOC_Os09g29490;LOC_Os12g16220;LOC_Os03g04250;LOC_Os03g04240;LOC_Os09g38670;LOC_Os12g12470;LOC_Os10g02040;LOC_Os11g10460;LOC_Os07g02440;LOC_Os06g40170;LOC_Os03g44150;LOC_Os05g10670;LOC_Os02g58720;LOC_Os03g51459;LOC_Os03g12820;LOC_Os10g38780;LOC_Os01g62900;LOC_Os05g04380;LOC_Os02g52550;LOC_Os04g44830;LOC_Os02g…
GO:0009733	response to auxin	Biological Process	103	2.42602e-08	1.40639e-11	LOC_Os07g06470;LOC_Os08g33660;LOC_Os07g48870;LOC_Os12g33070;LOC_Os01g45090;LOC_Os03g44150;LOC_Os10g25450;LOC_Os04g42950;LOC_Os01g01430;LOC_Os04g47300;LOC_Os06g48160;LOC_Os05g51630;LOC_Os04g52250;LOC_Os01g66490;LOC_Os10g40420;LOC_Os09g26980;LOC_Os09g24810;LOC_Os07g37210;LOC_Os10g06630;LOC_Os09g23620;LOC_Os02g44320;LOC_Os01g65370;LOC_Os05g37060;LOC_Os03g21030;LOC_Os03g01320;LOC_Os06g39880;LOC_Os09g…
GO:0009740	gibberellic acid mediated signaling pathway	Biological Process	44	3.51607e-08	2.0383e-11	LOC_Os09g27320;LOC_Os12g40920;LOC_Os11g04720;LOC_Os04g57720;LOC_Os03g20090;LOC_Os12g37690;LOC_Os05g31280;LOC_Os12g39220;LOC_Os02g36140;LOC_Os01g25500;LOC_Os05g34170;LOC_Os07g44850;LOC_Os03g19240;LOC_Os03g13540;LOC_Os11g45740;LOC_Os01g72330;LOC_Os03g38170;LOC_Os04g28280;LOC_Os01g32770;LOC_Os04g36070;LOC_Os12g03110;LOC_Os01g72210;LOC_Os01g11350;LOC_Os08g43600;LOC_Os03g03790;LOC_Os02g17780;LOC_Os07g…
GO:0046685	response to arsenic-containing substance	Biological Process	27	5.49772e-08	3.18708e-11	LOC_Os10g36924;LOC_Os06g41700;LOC_Os01g60770;LOC_Os01g04370;LOC_Os01g04380;LOC_Os03g16020;LOC_Os06g30370;LOC_Os03g15960;LOC_Os06g45710;LOC_Os11g05470;LOC_Os03g60720;LOC_Os02g13870;LOC_Os01g11860;LOC_Os06g11660;LOC_Os11g18730;LOC_Os11g19210;LOC_Os02g54140;LOC_Os06g12310;LOC_Os01g04360;LOC_Os04g54810;LOC_Os06g39230;LOC_Os03g16030;LOC_Os02g51620;LOC_Os05g39990;LOC_Os01g08860;LOC_Os02g50340;LOC_Os02g…
GO:0010583	response to cyclopentenone	Biological Process	48	9.45207e-08	5.47946e-11	LOC_Os07g36630;LOC_Os10g40360;LOC_Os07g40290;LOC_Os08g36920;LOC_Os01g55940;LOC_Os03g08460;LOC_Os02g45620;LOC_Os01g49710;LOC_Os10g38710;LOC_Os12g37970;LOC_Os01g11340;LOC_Os04g54930;LOC_Os12g12514;LOC_Os11g45740;LOC_Os02g43560;LOC_Os11g42800;LOC_Os12g03110;LOC_Os05g04600;LOC_Os10g38780;LOC_Os01g63770;LOC_Os10g38730;LOC_Os12g07030;LOC_Os07g42510;LOC_Os01g20206;LOC_Os11g06820;LOC_Os10g38360;LOC_Os12g…
GO:0042744	hydrogen peroxide catabolic process	Biological Process	39	4.35766e-07	2.52618e-10	LOC_Os10g25130;LOC_Os04g19740;LOC_Os02g43330;LOC_Os03g06940;LOC_Os07g48020;LOC_Os04g14690;LOC_Os01g39830;LOC_Os08g35210;LOC_Os03g05310;LOC_Os12g02080;LOC_Os11g43980;LOC_Os02g48450;LOC_Os04g57440;LOC_Os05g01810;LOC_Os01g22230;LOC_Os05g41990;LOC_Os04g35520;LOC_Os04g44830;LOC_Os07g02140;LOC_Os02g02400;LOC_Os01g73980;LOC_Os03g07450;LOC_Os12g06060;LOC_Os06g45710;LOC_Os07g02120;LOC_Os02g47790;LOC_Os02g…
GO:0009825	multidimensional cell growth	Biological Process	57	8.70465e-07	5.04618e-10	LOC_Os03g56270;LOC_Os12g03040;LOC_Os08g34380;LOC_Os08g01330;LOC_Os06g04090;LOC_Os06g05550;LOC_Os03g04770;LOC_Os01g51420;LOC_Os10g36390;LOC_Os07g14850;LOC_Os01g12660;LOC_Os11g03300;LOC_Os08g07890;LOC_Os03g03810;LOC_Os02g35970;LOC_Os07g04190;LOC_Os04g54930;LOC_Os10g32810;LOC_Os07g32660;LOC_Os05g04600;LOC_Os06g01490;LOC_Os02g34970;LOC_Os01g63770;LOC_Os05g37600;LOC_Os11g06820;LOC_Os07g41320;LOC_Os03g…
GO:0010033	response to organic substance	Biological Process	90	1.00174e-06	5.80719e-10	LOC_Os06g07300;LOC_Os03g04240;LOC_Os03g04250;LOC_Os11g26790;LOC_Os02g52930;LOC_Os10g05490;LOC_Os02g35490;LOC_Os07g32680;LOC_Os08g39590;LOC_Os08g39240;LOC_Os07g07410;LOC_Os02g44670;LOC_Os09g02250;LOC_Os06g02780;LOC_Os02g21090;LOC_Os03g58790;LOC_Os01g43590;LOC_Os07g37230;LOC_Os04g41350;LOC_Os02g33550;LOC_Os03g38470;LOC_Os04g20680;LOC_Os01g45140;LOC_Os03g05560;LOC_Os02g56540;LOC_Os01g01620;LOC_Os07g…
GO:0009408	response to heat	Biological Process	72	1.19603e-06	6.93351e-10	LOC_Os09g35790;LOC_Os03g06170;LOC_Os02g52150;LOC_Os01g46760;LOC_Os10g07200;LOC_Os05g41490;LOC_Os05g38290;LOC_Os03g02260;LOC_Os06g40150;LOC_Os02g51750;LOC_Os01g08860;LOC_Os05g50990;LOC_Os05g11990;LOC_Os03g20120;LOC_Os04g37990;LOC_Os04g10000;LOC_Os03g45340;LOC_Os06g35960;LOC_Os04g36750;LOC_Os10g40420;LOC_Os03g61740;LOC_Os08g35160;LOC_Os03g16030;LOC_Os01g42190;LOC_Os01g43590;LOC_Os05g49730;LOC_Os09g…
GO:0007030	Golgi organization	Biological Process	59	1.23478e-06	7.15812e-10	LOC_Os05g01810;LOC_Os02g01590;LOC_Os05g34170;LOC_Os04g57440;LOC_Os05g03130;LOC_Os02g30910;LOC_Os12g06270;LOC_Os02g48450;LOC_Os06g14810;LOC_Os02g51060;LOC_Os09g07350;LOC_Os12g29220;LOC_Os04g43390;LOC_Os06g12460;LOC_Os04g39880;LOC_Os08g06550;LOC_Os12g10660;LOC_Os02g34600;LOC_Os03g01820;LOC_Os04g08350;LOC_Os01g34560;LOC_Os03g62090;LOC_Os04g48930;LOC_Os01g44130;LOC_Os01g65550;LOC_Os07g41310;LOC_Os01g…
GO:0010200	response to chitin	Biological Process	127	1.61659e-06	9.37155e-10	LOC_Os01g09930;LOC_Os01g06640;LOC_Os01g19130;LOC_Os06g48180;LOC_Os01g65370;LOC_Os06g44310;LOC_Os09g25060;LOC_Os03g20550;LOC_Os03g58320;LOC_Os03g09170;LOC_Os09g23620;LOC_Os07g37210;LOC_Os02g06140;LOC_Os10g25550;LOC_Os03g20650;LOC_Os05g10670;LOC_Os09g25070;LOC_Os01g26300;LOC_Os02g35440;LOC_Os09g08720;LOC_Os04g34230;LOC_Os08g43120;LOC_Os01g02780;LOC_Os09g35790;LOC_Os12g07030;LOC_Os12g40920;LOC_Os03g…
GO:0043069	negative regulation of programmed cell death	Biological Process	77	1.83865e-06	1.06588e-09	LOC_Os02g49950;LOC_Os03g21030;LOC_Os03g01320;LOC_Os01g66490;LOC_Os10g40420;LOC_Os12g39120;LOC_Os05g41990;LOC_Os03g20550;LOC_Os09g19710;LOC_Os12g06060;LOC_Os01g01430;LOC_Os02g06140;LOC_Os04g47300;LOC_Os05g25770;LOC_Os10g25550;LOC_Os11g10460;LOC_Os05g10670;LOC_Os04g40410;LOC_Os08g43120;LOC_Os01g02780;LOC_Os04g55159;LOC_Os05g41670;LOC_Os03g21060;LOC_Os01g47760;LOC_Os03g55320;LOC_Os01g55940;LOC_Os01g…
GO:0045892	negative regulation of transcription, DNA-templated	Biological Process	62	2.01465e-06	1.16791e-09	LOC_Os03g41390;LOC_Os07g37210;LOC_Os06g22870;LOC_Os09g23620;LOC_Os09g24810;LOC_Os03g20550;LOC_Os06g01934;LOC_Os01g36460;LOC_Os07g40300;LOC_Os01g65370;LOC_Os05g37060;LOC_Os12g33070;LOC_Os09g25070;LOC_Os07g06470;LOC_Os03g21710;LOC_Os08g33660;LOC_Os06g43860;LOC_Os03g47730;LOC_Os08g05520;LOC_Os01g45090;LOC_Os01g55150;LOC_Os12g03150;LOC_Os01g62190;LOC_Os04g42950;LOC_Os01g47400;LOC_Os04g48830;LOC_Os10g…
GO:0009873	ethylene-activated signaling pathway	Biological Process	52	2.20031e-06	1.27554e-09	LOC_Os11g45740;LOC_Os05g04820;LOC_Os08g39840;LOC_Os05g04600;LOC_Os02g43820;LOC_Os12g41060;LOC_Os03g25550;LOC_Os02g10120;LOC_Os12g37690;LOC_Os03g20090;LOC_Os03g05280;LOC_Os12g40920;LOC_Os06g14670;LOC_Os01g51260;LOC_Os01g49720;LOC_Os02g36890;LOC_Os02g49986;LOC_Os08g36920;LOC_Os07g48630;LOC_Os11g03440;LOC_Os10g38710;LOC_Os01g49710;LOC_Os09g26880;LOC_Os08g43600;LOC_Os06g40150;LOC_Os07g14850;LOC_Os12g…
GO:0009664	plant-type cell wall organization	Biological Process	75	3.56022e-06	2.06389e-09	LOC_Os05g41990;LOC_Os05g39990;LOC_Os06g46340;LOC_Os09g27890;LOC_Os07g02200;LOC_Os03g04570;LOC_Os05g43820;LOC_Os03g45210;LOC_Os09g07350;LOC_Os09g29070;LOC_Os06g48180;LOC_Os01g51400;LOC_Os11g29420;LOC_Os01g04230;LOC_Os05g30820;LOC_Os11g10460;LOC_Os08g39590;LOC_Os11g42410;LOC_Os06g16300;LOC_Os06g48160;LOC_Os05g51630;LOC_Os01g60330;LOC_Os01g48710;LOC_Os03g10620;LOC_Os03g21730;LOC_Os03g60720;LOC_Os01g…
GO:0010413	glucuronoxylan metabolic process	Biological Process	49	3.69301e-06	2.14088e-09	LOC_Os08g05520;LOC_Os03g16610;LOC_Os01g62600;LOC_Os11g01570;LOC_Os06g43860;LOC_Os12g33070;LOC_Os01g73980;LOC_Os03g62090;LOC_Os01g47400;LOC_Os06g12280;LOC_Os04g57440;LOC_Os01g50900;LOC_Os05g01810;LOC_Os07g35730;LOC_Os12g16220;LOC_Os11g03780;LOC_Os03g44880;LOC_Os08g02070;LOC_Os12g15530;LOC_Os05g43820;LOC_Os01g36460;LOC_Os02g48450;LOC_Os01g62490;LOC_Os03g18120;LOC_Os01g68890;LOC_Os07g14850;LOC_Os12g…
GO:0010286	heat acclimation	Biological Process	41	3.73436e-06	2.16485e-09	LOC_Os03g21030;LOC_Os05g38530;LOC_Os04g01740;LOC_Os01g12580;LOC_Os07g48450;LOC_Os12g29400;LOC_Os03g53340;LOC_Os04g17100;LOC_Os01g04370;LOC_Os01g42190;LOC_Os02g15930;LOC_Os03g14180;LOC_Os03g16030;LOC_Os01g66490;LOC_Os03g21060;LOC_Os03g16920;LOC_Os01g32330;LOC_Os05g34830;LOC_Os04g36750;LOC_Os05g31280;LOC_Os01g04360;LOC_Os03g15960;LOC_Os06g35960;LOC_Os01g55240;LOC_Os01g41200;LOC_Os01g12650;LOC_Os03g…
GO:0045492	xylan biosynthetic process	Biological Process	49	4.54039e-06	2.63211e-09	LOC_Os03g18120;LOC_Os01g68890;LOC_Os07g14850;LOC_Os12g01730;LOC_Os12g01560;LOC_Os07g42924;LOC_Os07g34020;LOC_Os01g74450;LOC_Os03g02920;LOC_Os08g01330;LOC_Os06g04090;LOC_Os03g24930;LOC_Os03g11734;LOC_Os11g48060;LOC_Os03g25550;LOC_Os03g60300;LOC_Os05g38390;LOC_Os05g19670;LOC_Os01g51260;LOC_Os09g32470;LOC_Os01g72290;LOC_Os07g26630;LOC_Os05g04820;LOC_Os04g34230;LOC_Os02g58720;LOC_Os09g28600;LOC_Os08g…
GO:0080167	response to karrikin	Biological Process	65	5.32487e-06	3.08688e-09	LOC_Os05g37600;LOC_Os10g38360;LOC_Os02g44770;LOC_Os05g31280;LOC_Os03g16920;LOC_Os10g39140;LOC_Os03g10620;LOC_Os01g49720;LOC_Os01g41240;LOC_Os04g45000;LOC_Os05g34010;LOC_Os11g05320;LOC_Os10g38780;LOC_Os04g33740;LOC_Os10g38730;LOC_Os01g17214;LOC_Os10g38710;LOC_Os01g49710;LOC_Os07g48630;LOC_Os11g03440;LOC_Os06g15370;LOC_Os11g01340;LOC_Os01g04640;LOC_Os06g07600;LOC_Os04g45690;LOC_Os01g44069;LOC_Os08g…
GO:0009269	response to desiccation	Biological Process	35	6.11985e-06	3.54774e-09	LOC_Os12g40890;LOC_Os06g20150;LOC_Os03g07450;LOC_Os01g74450;LOC_Os03g02920;LOC_Os01g52780;LOC_Os06g21250;LOC_Os09g26880;LOC_Os04g56180;LOC_Os02g51750;LOC_Os06g14370;LOC_Os08g39850;LOC_Os11g10460;LOC_Os07g26630;LOC_Os02g43330;LOC_Os11g38860;LOC_Os08g36440;LOC_Os01g12580;LOC_Os06g46799;LOC_Os08g39840;LOC_Os01g62900;LOC_Os03g55850;LOC_Os02g58720;LOC_Os11g43980;LOC_Os02g10120;LOC_Os10g39170;LOC_Os05g…
GO:0009738	abscisic acid-activated signaling pathway	Biological Process	73	1.05601e-05	6.1218e-09	LOC_Os02g52780;LOC_Os07g44410;LOC_Os12g37690;LOC_Os05g44030;LOC_Os01g09830;LOC_Os12g35610;LOC_Os01g58850;LOC_Os04g54930;LOC_Os08g43600;LOC_Os11g02540;LOC_Os06g39960;LOC_Os06g23114;LOC_Os09g25090;LOC_Os11g42510;LOC_Os05g34830;LOC_Os01g46970;LOC_Os06g07030;LOC_Os01g20860;LOC_Os03g52650;LOC_Os07g48450;LOC_Os03g21710;LOC_Os01g64730;LOC_Os01g08260;LOC_Os02g34600;LOC_Os10g42130;LOC_Os04g44850;LOC_Os01g…
GO:0030003	cellular cation homeostasis	Biological Process	36	1.14879e-05	6.65965e-09	LOC_Os07g01070;LOC_Os01g25540;LOC_Os06g45710;LOC_Os01g44110;LOC_Os01g08260;LOC_Os08g35760;LOC_Os10g40600;LOC_Os01g42410;LOC_Os05g36050;LOC_Os12g32850;LOC_Os07g04180;LOC_Os02g51750;LOC_Os09g35630;LOC_Os02g49480;LOC_Os08g39850;LOC_Os03g43440;LOC_Os12g09300;LOC_Os03g48000;LOC_Os11g26880;LOC_Os12g29220;LOC_Os12g08090;LOC_Os01g06640;LOC_Os07g26630;LOC_Os02g01210;LOC_Os03g09940;LOC_Os05g44030;LOC_Os03g…
GO:0010817	regulation of hormone levels	Biological Process	44	1.20308e-05	6.97438e-09	LOC_Os10g40420;LOC_Os02g01140;LOC_Os09g25770;LOC_Os07g35880;LOC_Os02g56860;LOC_Os10g41550;LOC_Os03g64170;LOC_Os01g61570;LOC_Os05g43820;LOC_Os08g38270;LOC_Os07g02810;LOC_Os01g50370;LOC_Os10g20710;LOC_Os01g51400;LOC_Os09g04710;LOC_Os01g04230;LOC_Os08g01140;LOC_Os07g33620;LOC_Os03g45619;LOC_Os06g43044;LOC_Os07g29960;LOC_Os10g33370;LOC_Os06g16300;LOC_Os02g06140;LOC_Os03g54000;LOC_Os06g46500;LOC_Os04g…
GO:0009826	unidimensional cell growth	Biological Process	73	1.71519e-05	9.94312e-09	LOC_Os01g26210;LOC_Os03g13200;LOC_Os03g57780;LOC_Os11g01620;LOC_Os07g33440;LOC_Os02g04540;LOC_Os02g41460;LOC_Os01g70970;LOC_Os03g48710;LOC_Os05g33080;LOC_Os04g29580;LOC_Os08g40170;LOC_Os02g43640;LOC_Os04g53950;LOC_Os02g51320;LOC_Os02g42650;LOC_Os01g08470;LOC_Os05g33900;LOC_Os09g25810;LOC_Os02g28074;LOC_Os01g36240;LOC_Os02g02120;LOC_Os03g13570;LOC_Os03g63970;LOC_Os05g34854;LOC_Os07g33620;LOC_Os06g…
GO:0009695	jasmonic acid biosynthetic process	Biological Process	44	3.09013e-05	1.79138e-08	LOC_Os02g43290;LOC_Os07g17970;LOC_Os11g45740;LOC_Os01g09830;LOC_Os10g41480;LOC_Os08g39840;LOC_Os01g57770;LOC_Os12g37690;LOC_Os03g20090;LOC_Os02g10120;LOC_Os01g47760;LOC_Os01g52260;LOC_Os03g21060;LOC_Os11g42510;LOC_Os12g03040;LOC_Os10g40360;LOC_Os02g47790;LOC_Os01g63930;LOC_Os01g67540;LOC_Os12g37970;LOC_Os03g60080;LOC_Os09g27050;LOC_Os06g23684;LOC_Os08g39850;LOC_Os03g43440;LOC_Os07g48450;LOC_Os01g…
GO:0009739	response to gibberellin	Biological Process	51	3.6335e-05	2.10638e-08	LOC_Os05g39990;LOC_Os07g48680;LOC_Os09g23620;LOC_Os07g37210;LOC_Os01g66890;LOC_Os03g55290;LOC_Os09g24810;LOC_Os01g64360;LOC_Os07g40300;LOC_Os03g41060;LOC_Os01g36460;LOC_Os05g37060;LOC_Os01g65370;LOC_Os12g33070;LOC_Os03g63970;LOC_Os08g33660;LOC_Os11g04350;LOC_Os07g06470;LOC_Os08g05520;LOC_Os02g34600;LOC_Os10g41490;LOC_Os12g03150;LOC_Os01g70730;LOC_Os02g53530;LOC_Os03g56950;LOC_Os03g20650;LOC_Os02g…
GO:0009753	response to jasmonic acid	Biological Process	73	4.67928e-05	2.71263e-08	LOC_Os11g13670;LOC_Os12g07640;LOC_Os01g55240;LOC_Os08g34580;LOC_Os02g35660;LOC_Os01g11150;LOC_Os11g36160;LOC_Os03g60850;LOC_Os04g54930;LOC_Os10g02100;LOC_Os11g03440;LOC_Os06g51260;LOC_Os05g34010;LOC_Os05g04820;LOC_Os01g10370;LOC_Os03g25550;LOC_Os02g10120;LOC_Os03g58110;LOC_Os01g57770;LOC_Os01g63540;LOC_Os12g24020;LOC_Os11g07170;LOC_Os10g34230;LOC_Os12g03150;LOC_Os10g40600;LOC_Os08g35210;LOC_Os06g…
GO:0045893	positive regulation of transcription, DNA-templated	Biological Process	120	5.092e-05	2.95188e-08	LOC_Os12g01560;LOC_Os02g13800;LOC_Os04g54930;LOC_Os04g59120;LOC_Os11g03440;LOC_Os06g39960;LOC_Os12g07640;LOC_Os02g36890;LOC_Os02g52780;LOC_Os07g42510;LOC_Os03g25550;LOC_Os12g37690;LOC_Os09g29360;LOC_Os05g04820;LOC_Os02g33560;LOC_Os03g11550;LOC_Os03g10210;LOC_Os03g45450;LOC_Os04g59370;LOC_Os11g07460;LOC_Os01g55150;LOC_Os01g64730;LOC_Os12g03150;LOC_Os10g42130;LOC_Os08g05520;LOC_Os02g42380;LOC_Os04g…
GO:0009908	flower development	Biological Process	80	5.4894e-05	3.18226e-08	LOC_Os06g35200;LOC_Os04g49560;LOC_Os12g41180;LOC_Os01g16450;LOC_Os01g45700;LOC_Os03g22020;LOC_Os04g01740;LOC_Os11g05320;LOC_Os06g04080;LOC_Os12g02080;LOC_Os07g48020;LOC_Os08g36440;LOC_Os09g32964;LOC_Os01g44390;LOC_Os07g33440;LOC_Os03g13200;LOC_Os01g10850;LOC_Os05g02820;LOC_Os03g31679;LOC_Os08g45060;LOC_Os06g46920;LOC_Os04g45690;LOC_Os07g06570;LOC_Os01g44069;LOC_Os04g31710;LOC_Os04g57440;LOC_Os06g…
GO:0006833	water transport	Biological Process	47	5.77685e-05	3.3489e-08	LOC_Os12g06270;LOC_Os02g48450;LOC_Os04g52310;LOC_Os02g01210;LOC_Os10g25130;LOC_Os05g01810;LOC_Os05g34170;LOC_Os04g57440;LOC_Os05g03130;LOC_Os03g62090;LOC_Os04g48930;LOC_Os01g44130;LOC_Os07g41310;LOC_Os01g73980;LOC_Os01g65550;LOC_Os05g25350;LOC_Os12g09300;LOC_Os07g04180;LOC_Os12g10660;LOC_Os02g34600;LOC_Os04g08350;LOC_Os11g05290;LOC_Os04g01740;LOC_Os03g17790;LOC_Os09g08720;LOC_Os12g08090;LOC_Os07g…
GO:0009932	cell tip growth	Biological Process	46	6.75536e-05	3.91615e-08	LOC_Os11g06820;LOC_Os05g37600;LOC_Os07g41320;LOC_Os06g46500;LOC_Os04g39610;LOC_Os10g32810;LOC_Os04g59540;LOC_Os05g04600;LOC_Os07g32660;LOC_Os01g63770;LOC_Os06g01490;LOC_Os10g36390;LOC_Os03g04770;LOC_Os01g51420;LOC_Os11g37260;LOC_Os02g35970;LOC_Os03g03810;LOC_Os08g07890;LOC_Os04g54930;LOC_Os07g04190;LOC_Os05g08530;LOC_Os08g34380;LOC_Os03g56270;LOC_Os06g05550;LOC_Os02g17730;LOC_Os10g41550;LOC_Os07g…
GO:1902039	negative regulation of seed dormancy process	Biological Process	6	7.18774e-05	4.16681e-08	LOC_Os05g49730;LOC_Os05g38290;LOC_Os01g46760;LOC_Os09g15670;LOC_Os01g62760;LOC_Os03g16170
GO:0010150	leaf senescence	Biological Process	51	0.000111335	6.4542e-08	LOC_Os07g48450;LOC_Os05g40960;LOC_Os09g15670;LOC_Os12g29220;LOC_Os05g49730;LOC_Os02g48450;LOC_Os02g30910;LOC_Os03g21030;LOC_Os08g10300;LOC_Os05g34830;LOC_Os12g02500;LOC_Os02g04640;LOC_Os02g33550;LOC_Os08g10310;LOC_Os06g16300;LOC_Os01g74020;LOC_Os11g02570;LOC_Os01g65550;LOC_Os02g42620;LOC_Os01g01430;LOC_Os03g16170;LOC_Os10g42130;LOC_Os12g26290;LOC_Os05g10670;LOC_Os05g38290;LOC_Os01g21420;LOC_Os05g…
GO:0000271	polysaccharide biosynthetic process	Biological Process	42	0.000123804	7.17705e-08	LOC_Os01g63580;LOC_Os08g01140;LOC_Os01g34560;LOC_Os07g31500;LOC_Os10g31910;LOC_Os03g54000;LOC_Os12g40890;LOC_Os07g41310;LOC_Os02g06140;LOC_Os06g16300;LOC_Os02g46680;LOC_Os05g34170;LOC_Os06g22870;LOC_Os07g35880;LOC_Os10g41550;LOC_Os07g09050;LOC_Os06g14810;LOC_Os05g37470;LOC_Os10g20710;LOC_Os04g05050;LOC_Os11g42450;LOC_Os01g55260;LOC_Os07g02810;LOC_Os04g54930;LOC_Os08g07890;LOC_Os03g03810;LOC_Os02g…
GO:0009698	phenylpropanoid metabolic process	Biological Process	24	0.000148873	8.63029e-08	LOC_Os02g28220;LOC_Os04g17100;LOC_Os03g06940;LOC_Os01g74450;LOC_Os11g26880;LOC_Os03g59040;LOC_Os01g53420;LOC_Os01g53330;LOC_Os07g08350;LOC_Os01g39830;LOC_Os01g25540;LOC_Os07g42520;LOC_Os08g02030;LOC_Os01g52160;LOC_Os05g47540;LOC_Os02g12730;LOC_Os11g07680;LOC_Os01g28840;LOC_Os01g43270;LOC_Os10g18820;LOC_Os01g43460;LOC_Os03g04130;LOC_Os01g25560;LOC_Os02g44940
GO:0010162	seed dormancy process	Biological Process	41	0.000192541	1.11618e-07	LOC_Os04g49980;LOC_Os05g39250;LOC_Os01g72330;LOC_Os01g10320;LOC_Os04g36070;LOC_Os03g14370;LOC_Os05g34170;LOC_Os01g70310;LOC_Os11g04720;LOC_Os04g57720;LOC_Os03g43670;LOC_Os03g09170;LOC_Os07g34520;LOC_Os10g40960;LOC_Os01g70930;LOC_Os11g32100;LOC_Os12g42280;LOC_Os06g50900;LOC_Os08g41320;LOC_Os04g32110;LOC_Os04g28280;LOC_Os12g03110;LOC_Os05g46040;LOC_Os04g43200;LOC_Os12g07030;LOC_Os12g40920;LOC_Os05g…
GO:0009805	coumarin biosynthetic process	Biological Process	37	0.000223488	1.29558e-07	LOC_Os11g03440;LOC_Os12g03150;LOC_Os01g34560;LOC_Os01g45090;LOC_Os01g61610;LOC_Os08g05520;LOC_Os12g37970;LOC_Os08g33660;LOC_Os12g33070;LOC_Os09g08990;LOC_Os04g57550;LOC_Os02g12890;LOC_Os02g36890;LOC_Os01g70930;LOC_Os02g49986;LOC_Os04g42950;LOC_Os01g41200;LOC_Os12g07640;LOC_Os11g35400;LOC_Os02g47790;LOC_Os05g04170;LOC_Os03g25550;LOC_Os09g23620;LOC_Os06g14670;LOC_Os07g37210;LOC_Os12g37690;LOC_Os12g…
GO:0006857	oligopeptide transport	Biological Process	41	0.000233869	1.35576e-07	LOC_Os04g45900;LOC_Os03g09940;LOC_Os01g65370;LOC_Os04g52310;LOC_Os01g36460;LOC_Os08g38400;LOC_Os09g23620;LOC_Os07g37210;LOC_Os04g42950;LOC_Os02g42620;LOC_Os05g25260;LOC_Os03g54000;LOC_Os08g33660;LOC_Os02g02460;LOC_Os12g33070;LOC_Os04g44320;LOC_Os12g03150;LOC_Os10g40600;LOC_Os08g05520;LOC_Os01g45090;LOC_Os03g06520;LOC_Os04g10690;LOC_Os05g04820;LOC_Os01g51260;LOC_Os03g25550;LOC_Os02g02450;LOC_Os12g…
GO:0045471	response to ethanol	Biological Process	8	0.000244491	1.41734e-07	LOC_Os01g04370;LOC_Os02g54140;LOC_Os03g16030;LOC_Os01g04380;LOC_Os01g04360;LOC_Os03g16020;LOC_Os01g08860;LOC_Os03g15960
GO:0009867	jasmonic acid mediated signaling pathway	Biological Process	84	0.000263007	1.52468e-07	LOC_Os04g59370;LOC_Os11g07460;LOC_Os03g45450;LOC_Os08g05520;LOC_Os01g02600;LOC_Os10g42130;LOC_Os04g44850;LOC_Os01g42410;LOC_Os01g08260;LOC_Os02g51930;LOC_Os08g39830;LOC_Os02g42380;LOC_Os07g18240;LOC_Os05g34830;LOC_Os04g08280;LOC_Os01g20860;LOC_Os01g36460;LOC_Os02g15750;LOC_Os03g08930;LOC_Os03g18960;LOC_Os07g48450;LOC_Os03g52650;LOC_Os12g35610;LOC_Os07g14850;LOC_Os06g11330;LOC_Os12g07640;LOC_Os02g…
GO:0007169	transmembrane receptor protein tyrosine kinase signaling pathway	Biological Process	22	0.000292962	1.69833e-07	LOC_Os07g03870;LOC_Os08g45060;LOC_Os02g42620;LOC_Os07g07230;LOC_Os07g18240;LOC_Os10g32810;LOC_Os06g16300;LOC_Os09g17630;LOC_Os04g52780;LOC_Os03g56270;LOC_Os03g20450;LOC_Os01g60330;LOC_Os08g07890;LOC_Os03g03570;LOC_Os07g04190;LOC_Os01g04230;LOC_Os06g35200;LOC_Os01g72700;LOC_Os03g04770;LOC_Os03g08550;LOC_Os01g42294;LOC_Os10g41550
GO:0080086	stamen filament development	Biological Process	15	0.000331902	1.92407e-07	LOC_Os03g02610;LOC_Os11g45740;LOC_Os02g10120;LOC_Os12g37970;LOC_Os03g01800;LOC_Os12g37690;LOC_Os02g46910;LOC_Os03g20090;LOC_Os01g45090;LOC_Os10g02770;LOC_Os04g42950;LOC_Os03g13570;LOC_Os08g39840;LOC_Os07g48870;LOC_Os08g39850
GO:0009741	response to brassinosteroid	Biological Process	37	0.00037704	2.18574e-07	LOC_Os01g43750;LOC_Os01g70970;LOC_Os05g30820;LOC_Os12g10660;LOC_Os05g25430;LOC_Os03g57780;LOC_Os01g11160;LOC_Os04g51460;LOC_Os03g44150;LOC_Os04g40440;LOC_Os01g43740;LOC_Os04g42620;LOC_Os07g23570;LOC_Os01g55940;LOC_Os08g13920;LOC_Os06g38970;LOC_Os01g25540;LOC_Os08g42840;LOC_Os06g48160;LOC_Os01g24780;LOC_Os07g40290;LOC_Os08g01330;LOC_Os11g05740;LOC_Os11g30560;LOC_Os01g25560;LOC_Os02g44940;LOC_Os02g…
GO:0009750	response to fructose	Biological Process	45	0.000476821	2.76418e-07	LOC_Os03g17230;LOC_Os08g36320;LOC_Os05g31280;LOC_Os07g41320;LOC_Os01g57770;LOC_Os12g08090;LOC_Os04g19740;LOC_Os07g26630;LOC_Os06g22060;LOC_Os08g43120;LOC_Os03g55850;LOC_Os03g28300;LOC_Os02g54254;LOC_Os04g48270;LOC_Os09g23350;LOC_Os07g14850;LOC_Os01g52770;LOC_Os01g21034;LOC_Os09g35630;LOC_Os03g43440;LOC_Os06g07600;LOC_Os08g34580;LOC_Os04g10000;LOC_Os05g44200;LOC_Os03g55290;LOC_Os08g02120;LOC_Os02g…
GO:0071555	cell wall organization	Biological Process	69	0.000515677	2.98943e-07	LOC_Os04g54930;LOC_Os01g51420;LOC_Os07g15370;LOC_Os08g45060;LOC_Os06g46500;LOC_Os02g51890;LOC_Os04g53950;LOC_Os11g06820;LOC_Os10g32810;LOC_Os06g43860;LOC_Os01g72700;LOC_Os09g04710;LOC_Os01g34560;LOC_Os07g41360;LOC_Os01g65550;LOC_Os03g54000;LOC_Os03g40670;LOC_Os02g01140;LOC_Os03g63700;LOC_Os06g01972;LOC_Os02g06150;LOC_Os02g17730;LOC_Os07g35880;LOC_Os06g22870;LOC_Os05g37470;LOC_Os03g03570;LOC_Os03g…
GO:0010224	response to UV-B	Biological Process	46	0.000516675	2.99522e-07	LOC_Os06g24180;LOC_Os03g10620;LOC_Os01g51260;LOC_Os03g25550;LOC_Os12g37690;LOC_Os03g20090;LOC_Os09g36580;LOC_Os06g14670;LOC_Os07g07230;LOC_Os03g01330;LOC_Os05g04820;LOC_Os03g14050;LOC_Os11g03440;LOC_Os12g37970;LOC_Os03g57780;LOC_Os03g12530;LOC_Os06g39960;LOC_Os03g44740;LOC_Os12g07640;LOC_Os05g02390;LOC_Os12g43363;LOC_Os02g49986;LOC_Os02g36890;LOC_Os02g11700;LOC_Os04g08280;LOC_Os07g37210;LOC_Os01g…
GO:0051707	response to other organism	Biological Process	86	0.000596949	3.46057e-07	LOC_Os11g10710;LOC_Os09g30414;LOC_Os02g48770;LOC_Os04g33920;LOC_Os03g20450;LOC_Os10g39970;LOC_Os04g46990;LOC_Os12g01700;LOC_Os03g57080;LOC_Os08g39850;LOC_Os06g48030;LOC_Os07g34850;LOC_Os01g72510;LOC_Os09g25570;LOC_Os08g24790;LOC_Os11g08100;LOC_Os02g34970;LOC_Os05g01140;LOC_Os08g39840;LOC_Os03g08790;LOC_Os04g33990;LOC_Os03g14654;LOC_Os10g07556;LOC_Os06g20790;LOC_Os03g04680;LOC_Os03g62090;LOC_Os04g…
GO:0016126	sterol biosynthetic process	Biological Process	42	0.000664266	3.85082e-07	LOC_Os05g12040;LOC_Os01g39830;LOC_Os08g43120;LOC_Os06g45990;LOC_Os01g63770;LOC_Os03g59040;LOC_Os06g22060;LOC_Os11g06820;LOC_Os01g42294;LOC_Os06g11660;LOC_Os06g19530;LOC_Os04g02050;LOC_Os11g18366;LOC_Os02g51750;LOC_Os01g07500;LOC_Os01g11340;LOC_Os08g39270;LOC_Os05g11990;LOC_Os05g50990;LOC_Os02g12730;LOC_Os06g14810;LOC_Os09g07350;LOC_Os03g06940;LOC_Os03g52650;LOC_Os01g32770;LOC_Os05g37470;LOC_Os05g…
GO:0048354	mucilage biosynthetic process involved in seed coat development	Biological Process	19	0.000841309	4.87715e-07	LOC_Os07g48870;LOC_Os05g35360;LOC_Os01g45090;LOC_Os09g23620;LOC_Os12g37970;LOC_Os06g14670;LOC_Os12g37690;LOC_Os07g37210;LOC_Os03g20090;LOC_Os11g03440;LOC_Os12g03150;LOC_Os03g25550;LOC_Os12g07640;LOC_Os12g06270;LOC_Os01g36460;LOC_Os01g65370;LOC_Os02g49986;LOC_Os05g04820;LOC_Os11g45740
GO:0009725	response to hormone	Biological Process	68	0.000842482	4.88395e-07	LOC_Os06g02900;LOC_Os04g45690;LOC_Os02g17710;LOC_Os12g12120;LOC_Os11g01620;LOC_Os07g28890;LOC_Os03g58470;LOC_Os08g03020;LOC_Os01g23970;LOC_Os12g12934;LOC_Os02g17940;LOC_Os04g43710;LOC_Os12g39320;LOC_Os03g60560;LOC_Os04g52440;LOC_Os12g35350;LOC_Os10g38110;LOC_Os04g33820;LOC_Os01g46400;LOC_Os05g51670;LOC_Os04g35500;LOC_Os02g40260;LOC_Os03g47730;LOC_Os08g16260;LOC_Os11g35450;LOC_Os01g09640;LOC_Os01g…
GO:0048589	developmental growth	Biological Process	62	0.000946233	5.48541e-07	LOC_Os11g35240;LOC_Os03g22040;LOC_Os06g35200;LOC_Os03g50960;LOC_Os11g01040;LOC_Os01g03940;LOC_Os07g41200;LOC_Os01g16450;LOC_Os01g26270;LOC_Os07g07230;LOC_Os12g13910;LOC_Os04g59190;LOC_Os01g08130;LOC_Os01g32920;LOC_Os01g66740;LOC_Os07g48370;LOC_Os06g20150;LOC_Os11g03160;LOC_Os07g37810;LOC_Os01g42200;LOC_Os12g34524;LOC_Os05g38500;LOC_Os02g06150;LOC_Os06g46799;LOC_Os08g38270;LOC_Os10g32990;LOC_Os06g…
GO:0044765	single-organism transport	Biological Process	75	0.00101295	5.8722e-07	LOC_Os07g42510;LOC_Os11g36000;LOC_Os06g35200;LOC_Os01g74550;LOC_Os04g28420;LOC_Os02g06090;LOC_Os02g54190;LOC_Os10g19180;LOC_Os07g07230;LOC_Os05g25430;LOC_Os11g02540;LOC_Os11g01620;LOC_Os09g28180;LOC_Os03g57780;LOC_Os08g03020;LOC_Os01g70970;LOC_Os01g09580;LOC_Os04g45690;LOC_Os05g45090;LOC_Os06g50950;LOC_Os08g45060;LOC_Os11g13670;LOC_Os08g32060;LOC_Os09g25770;LOC_Os02g17730;LOC_Os02g06150;LOC_Os07g…
GO:0009415	response to water	Biological Process	7	0.0011293	6.54669e-07	LOC_Os02g44870;LOC_Os11g26760;LOC_Os11g26780;LOC_Os03g45280;LOC_Os11g26570;LOC_Os11g18940;LOC_Os11g26790
GO:0044710	single-organism metabolic process	Biological Process	85	0.00113258	6.56568e-07	LOC_Os01g71170;LOC_Os03g14654;LOC_Os03g57950;LOC_Os08g36680;LOC_Os03g08790;LOC_Os09g26920;LOC_Os01g51890;LOC_Os11g08100;LOC_Os02g43820;LOC_Os01g62760;LOC_Os06g11090;LOC_Os05g46350;LOC_Os09g28280;LOC_Os06g08830;LOC_Os10g39970;LOC_Os04g51660;LOC_Os02g56540;LOC_Os03g05560;LOC_Os09g26980;LOC_Os06g02780;LOC_Os12g38170;LOC_Os03g55420;LOC_Os06g03890;LOC_Os04g45720;LOC_Os09g28650;LOC_Os01g61570;LOC_Os01g…
GO:2000762	regulation of phenylpropanoid metabolic process	Biological Process	20	0.00115696	6.70701e-07	LOC_Os01g36460;LOC_Os12g07640;LOC_Os01g65370;LOC_Os04g42950;LOC_Os02g49986;LOC_Os05g04820;LOC_Os02g36890;LOC_Os01g51260;LOC_Os12g33070;LOC_Os08g33660;LOC_Os12g37970;LOC_Os06g14670;LOC_Os07g37210;LOC_Os12g37690;LOC_Os01g45090;LOC_Os09g23620;LOC_Os08g05520;LOC_Os11g03440;LOC_Os12g03150;LOC_Os03g25550
GO:0010102	lateral root morphogenesis	Biological Process	21	0.00125457	7.27284e-07	LOC_Os02g13520;LOC_Os03g55350;LOC_Os10g40420;LOC_Os04g52250;LOC_Os07g04190;LOC_Os04g48416;LOC_Os03g01300;LOC_Os02g10520;LOC_Os03g50960;LOC_Os12g40890;LOC_Os03g01320;LOC_Os03g56270;LOC_Os09g26920;LOC_Os01g64860;LOC_Os04g46830;LOC_Os04g52260;LOC_Os02g44320;LOC_Os10g25450;LOC_Os01g53880;LOC_Os11g12530;LOC_Os12g06270
GO:0042742	defense response to bacterium	Biological Process	116	0.00156919	9.09675e-07	LOC_Os10g02040;LOC_Os12g07150;LOC_Os08g06550;LOC_Os02g50340;LOC_Os10g41490;LOC_Os06g49220;LOC_Os03g04250;LOC_Os06g45710;LOC_Os09g39910;LOC_Os10g40420;LOC_Os03g61740;LOC_Os03g04570;LOC_Os05g49700;LOC_Os03g38170;LOC_Os01g02560;LOC_Os06g23684;LOC_Os03g58420;LOC_Os01g52780;LOC_Os06g15370;LOC_Os04g10000;LOC_Os01g12260;LOC_Os01g47760;LOC_Os11g05290;LOC_Os11g37950;LOC_Os02g34600;LOC_Os01g42410;LOC_Os01g…
GO:0008152	metabolic process	Biological Process	114	0.00170095	9.86057e-07	LOC_Os11g04350;LOC_Os09g28640;LOC_Os05g45100;LOC_Os02g14160;LOC_Os01g45110;LOC_Os05g45110;LOC_Os03g03350;LOC_Os04g27190;LOC_Os02g11700;LOC_Os07g05110;LOC_Os05g02890;LOC_Os10g26150;LOC_Os01g53330;LOC_Os01g20860;LOC_Os06g41910;LOC_Os04g59190;LOC_Os01g10850;LOC_Os04g07110;LOC_Os03g22620;LOC_Os03g40100;LOC_Os07g30620;LOC_Os02g57280;LOC_Os04g52440;LOC_Os01g61940;LOC_Os02g51900;LOC_Os04g44354;LOC_Os05g…
GO:0048646	anatomical structure formation involved in morphogenesis	Biological Process	23	0.00237652	1.37769e-06	LOC_Os05g50490;LOC_Os08g14700;LOC_Os03g54910;LOC_Os07g29960;LOC_Os04g42620;LOC_Os02g56540;LOC_Os07g33620;LOC_Os03g45619;LOC_Os11g35450;LOC_Os03g21730;LOC_Os03g57880;LOC_Os07g35510;LOC_Os07g40940;LOC_Os07g35520;LOC_Os04g40440;LOC_Os03g39020;LOC_Os07g05190;LOC_Os07g35480;LOC_Os07g35560;LOC_Os01g72700;LOC_Os06g28480;LOC_Os07g33440;LOC_Os08g34320
GO:0071704	organic substance metabolic process	Biological Process	77	0.00256601	1.48754e-06	LOC_Os07g40150;LOC_Os02g40260;LOC_Os06g38970;LOC_Os12g42910;LOC_Os01g61330;LOC_Os06g06550;LOC_Os03g02750;LOC_Os02g43280;LOC_Os02g33380;LOC_Os02g32580;LOC_Os02g51930;LOC_Os02g18450;LOC_Os08g35210;LOC_Os01g72210;LOC_Os05g05930;LOC_Os08g29020;LOC_Os01g11010;LOC_Os04g22120;LOC_Os06g50950;LOC_Os10g05990;LOC_Os06g33170;LOC_Os10g06000;LOC_Os08g26840;LOC_Os06g11510;LOC_Os02g44820;LOC_Os04g20400;LOC_Os01g…
GO:0009963	positive regulation of flavonoid biosynthetic process	Biological Process	37	0.00258594	1.4991e-06	LOC_Os07g28890;LOC_Os01g21034;LOC_Os03g43440;LOC_Os01g04640;LOC_Os08g07890;LOC_Os04g02050;LOC_Os12g04500;LOC_Os01g46080;LOC_Os01g41200;LOC_Os01g12650;LOC_Os01g57770;LOC_Os02g42940;LOC_Os08g36320;LOC_Os04g51610;LOC_Os11g42800;LOC_Os01g54030;LOC_Os06g34120;LOC_Os09g32470;LOC_Os12g08090;LOC_Os08g43120;LOC_Os01g42410;LOC_Os12g32850;LOC_Os01g08260;LOC_Os12g43660;LOC_Os12g09300;LOC_Os07g04180;LOC_Os02g…
GO:0009813	flavonoid biosynthetic process	Biological Process	39	0.00263185	1.52571e-06	LOC_Os03g10620;LOC_Os10g39140;LOC_Os01g08220;LOC_Os03g20090;LOC_Os02g17940;LOC_Os09g26960;LOC_Os09g35940;LOC_Os01g11150;LOC_Os10g37110;LOC_Os04g51990;LOC_Os11g03440;LOC_Os04g51660;LOC_Os01g55240;LOC_Os03g44740;LOC_Os09g08990;LOC_Os01g64750;LOC_Os02g49986;LOC_Os11g29720;LOC_Os07g34260;LOC_Os09g26980;LOC_Os05g44600;LOC_Os01g43270;LOC_Os01g65370;LOC_Os03g18030;LOC_Os01g53330;LOC_Os01g53420;LOC_Os03g…
GO:0010438	cellular response to sulfur starvation	Biological Process	17	0.00276495	1.60287e-06	LOC_Os02g36890;LOC_Os05g04820;LOC_Os02g49986;LOC_Os04g42950;LOC_Os01g65370;LOC_Os12g07640;LOC_Os01g36460;LOC_Os03g25550;LOC_Os12g03150;LOC_Os11g03440;LOC_Os08g05520;LOC_Os09g23620;LOC_Os07g37210;LOC_Os06g14670;LOC_Os08g33660;LOC_Os12g33070;LOC_Os01g51260
GO:0006084	acetyl-CoA metabolic process	Biological Process	25	0.0028231	1.63658e-06	LOC_Os08g39270;LOC_Os05g46350;LOC_Os02g51750;LOC_Os02g12730;LOC_Os03g01820;LOC_Os01g34560;LOC_Os04g30800;LOC_Os01g60330;LOC_Os07g44370;LOC_Os03g23960;LOC_Os05g34170;LOC_Os11g06820;LOC_Os01g42294;LOC_Os09g37910;LOC_Os01g63770;LOC_Os06g14810;LOC_Os01g39830;LOC_Os02g15810;LOC_Os11g42800;LOC_Os05g37470;LOC_Os06g22060;LOC_Os03g06940;LOC_Os03g52650;LOC_Os03g59040;LOC_Os09g07350
GO:0009620	response to fungus	Biological Process	44	0.00336324	1.9497e-06	LOC_Os02g10120;LOC_Os03g60300;LOC_Os03g20090;LOC_Os12g37690;LOC_Os11g35240;LOC_Os01g52260;LOC_Os04g43200;LOC_Os11g45740;LOC_Os02g43290;LOC_Os01g11810;LOC_Os11g06880;LOC_Os10g41480;LOC_Os05g44030;LOC_Os08g39840;LOC_Os04g51030;LOC_Os03g28300;LOC_Os01g46350;LOC_Os12g37970;LOC_Os09g27050;LOC_Os11g03300;LOC_Os06g14370;LOC_Os08g39850;LOC_Os06g23684;LOC_Os04g29960;LOC_Os08g34550;LOC_Os10g40360;LOC_Os04g…
GO:0005976	polysaccharide metabolic process	Biological Process	39	0.00339814	1.96993e-06	LOC_Os02g17710;LOC_Os03g20120;LOC_Os06g06960;LOC_Os03g02610;LOC_Os03g53540;LOC_Os05g33080;LOC_Os08g45060;LOC_Os01g66740;LOC_Os06g15370;LOC_Os01g67360;LOC_Os04g52780;LOC_Os05g34010;LOC_Os01g53640;LOC_Os08g01530;LOC_Os10g28120;LOC_Os03g21730;LOC_Os10g28080;LOC_Os01g07360;LOC_Os03g22790;LOC_Os05g37700;LOC_Os04g46130;LOC_Os12g38810;LOC_Os08g42840;LOC_Os10g33370;LOC_Os11g42410;LOC_Os08g39590;LOC_Os02g…
GO:0009809	lignin biosynthetic process	Biological Process	35	0.00391836	2.27151e-06	LOC_Os09g08720;LOC_Os03g49610;LOC_Os07g41060;LOC_Os04g53860;LOC_Os02g58720;LOC_Os03g22020;LOC_Os01g62490;LOC_Os06g46799;LOC_Os01g16450;LOC_Os09g29490;LOC_Os01g20780;LOC_Os02g51890;LOC_Os10g40420;LOC_Os05g38390;LOC_Os06g24180;LOC_Os09g31522;LOC_Os08g01330;LOC_Os01g18860;LOC_Os03g56820;LOC_Os02g40900;LOC_Os04g59200;LOC_Os12g43363;LOC_Os09g08990;LOC_Os01g65550;LOC_Os03g17760;LOC_Os03g44740;LOC_Os11g…
GO:0045926	negative regulation of growth	Biological Process	11	0.00405479	2.3506e-06	LOC_Os11g26880;LOC_Os01g36240;LOC_Os03g13200;LOC_Os03g60560;LOC_Os01g25540;LOC_Os07g48060;LOC_Os02g44940;LOC_Os01g25560;LOC_Os05g02390;LOC_Os10g02040;LOC_Os01g62190
GO:0008361	regulation of cell size	Biological Process	32	0.0042635	2.4716e-06	LOC_Os07g41310;LOC_Os12g40890;LOC_Os02g46680;LOC_Os12g03040;LOC_Os02g42380;LOC_Os03g56270;LOC_Os01g60330;LOC_Os06g05550;LOC_Os07g01180;LOC_Os10g31910;LOC_Os01g01430;LOC_Os03g60080;LOC_Os03g03810;LOC_Os11g03300;LOC_Os11g07460;LOC_Os01g63580;LOC_Os07g04190;LOC_Os04g54930;LOC_Os07g48450;LOC_Os05g37470;LOC_Os04g05050;LOC_Os05g04600;LOC_Os01g63770;LOC_Os07g40300;LOC_Os11g48000;LOC_Os05g37600;LOC_Os01g…
GO:0009627	systemic acquired resistance	Biological Process	57	0.00551239	3.19559e-06	LOC_Os04g52310;LOC_Os02g44320;LOC_Os03g61670;LOC_Os09g37050;LOC_Os10g05600;LOC_Os08g35210;LOC_Os04g14690;LOC_Os07g35630;LOC_Os04g46830;LOC_Os06g43600;LOC_Os03g01320;LOC_Os07g04730;LOC_Os01g42190;LOC_Os08g10310;LOC_Os02g02400;LOC_Os12g04410;LOC_Os10g40420;LOC_Os07g35730;LOC_Os10g06630;LOC_Os06g48300;LOC_Os08g41340;LOC_Os11g07680;LOC_Os05g04170;LOC_Os02g42620;LOC_Os03g04240;LOC_Os07g48229;LOC_Os04g…
GO:0010015	root morphogenesis	Biological Process	35	0.00562622	3.26158e-06	LOC_Os10g32990;LOC_Os08g38270;LOC_Os03g11400;LOC_Os03g58790;LOC_Os06g44310;LOC_Os03g64170;LOC_Os03g58350;LOC_Os01g61570;LOC_Os03g05560;LOC_Os05g38500;LOC_Os06g04850;LOC_Os09g39910;LOC_Os02g01140;LOC_Os10g38800;LOC_Os02g52930;LOC_Os01g60330;LOC_Os06g43044;LOC_Os08g42840;LOC_Os07g34070;LOC_Os09g04710;LOC_Os01g04230;LOC_Os02g35440;LOC_Os12g43660;LOC_Os08g16050;LOC_Os05g33900;LOC_Os01g42294;LOC_Os03g…
GO:0009832	plant-type cell wall biogenesis	Biological Process	33	0.00780586	4.52514e-06	LOC_Os05g43820;LOC_Os01g62490;LOC_Os08g34020;LOC_Os01g39830;LOC_Os06g14810;LOC_Os01g55260;LOC_Os03g06940;LOC_Os04g39610;LOC_Os04g19740;LOC_Os05g38390;LOC_Os07g42420;LOC_Os06g46340;LOC_Os09g30120;LOC_Os02g54820;LOC_Os01g42294;LOC_Os12g36890;LOC_Os06g05550;LOC_Os05g51630;LOC_Os01g12260;LOC_Os03g56270;LOC_Os01g60330;LOC_Os05g50750;LOC_Os08g39270;LOC_Os07g04190;LOC_Os03g16610;LOC_Os01g62600;LOC_Os02g…
GO:0006629	lipid metabolic process	Biological Process	46	0.00854458	4.95338e-06	LOC_Os03g64170;LOC_Os01g61570;LOC_Os01g43140;LOC_Os07g04730;LOC_Os09g33820;LOC_Os06g03890;LOC_Os01g59870;LOC_Os03g40670;LOC_Os02g01140;LOC_Os03g45194;LOC_Os03g38470;LOC_Os04g59330;LOC_Os06g43044;LOC_Os02g40440;LOC_Os01g11700;LOC_Os06g06250;LOC_Os01g44130;LOC_Os10g32580;LOC_Os04g35100;LOC_Os09g04710;LOC_Os08g34720;LOC_Os05g11910;LOC_Os06g34120;LOC_Os04g39610;LOC_Os02g31030;LOC_Os02g50690;LOC_Os12g…
GO:0050794	regulation of cellular process	Biological Process	143	0.00882716	5.1172e-06	LOC_Os07g40940;LOC_Os11g29420;LOC_Os06g40170;LOC_Os07g35560;LOC_Os09g37060;LOC_Os12g38120;LOC_Os01g08780;LOC_Os08g41290;LOC_Os11g42410;LOC_Os03g04240;LOC_Os03g05560;LOC_Os07g04150;LOC_Os08g03310;LOC_Os01g43270;LOC_Os07g37230;LOC_Os06g40180;LOC_Os02g35530;LOC_Os04g47420;LOC_Os07g46510;LOC_Os07g25810;LOC_Os07g08320;LOC_Os08g01100;LOC_Os10g39970;LOC_Os04g53990;LOC_Os06g12740;LOC_Os03g30830;LOC_Os12g…
GO:0009617	response to bacterium	Biological Process	65	0.00898796	5.21041e-06	LOC_Os07g31500;LOC_Os03g11910;LOC_Os01g71474;LOC_Os01g26300;LOC_Os07g02780;LOC_Os06g12460;LOC_Os06g16300;LOC_Os10g38800;LOC_Os01g01430;LOC_Os05g33690;LOC_Os08g42840;LOC_Os02g50330;LOC_Os11g01530;LOC_Os01g66490;LOC_Os08g02990;LOC_Os01g50370;LOC_Os07g04730;LOC_Os05g38530;LOC_Os08g06280;LOC_Os07g04190;LOC_Os12g01530;LOC_Os11g03300;LOC_Os03g56270;LOC_Os12g03040;LOC_Os12g10870;LOC_Os06g04090;LOC_Os09g…
GO:0080027	response to herbivore	Biological Process	11	0.0102834	5.96138e-06	LOC_Os09g23350;LOC_Os07g35880;LOC_Os02g54820;LOC_Os10g41550;LOC_Os02g10120;LOC_Os03g04770;LOC_Os11g37950;LOC_Os10g32810;LOC_Os08g34580;LOC_Os08g39850;LOC_Os08g39840
GO:0010114	response to red light	Biological Process	34	0.0112763	6.53701e-06	LOC_Os01g64360;LOC_Os04g57720;LOC_Os05g39990;LOC_Os12g19470;LOC_Os01g06640;LOC_Os01g60770;LOC_Os10g40740;LOC_Os05g50350;LOC_Os03g60720;LOC_Os06g14810;LOC_Os02g15750;LOC_Os01g11350;LOC_Os07g05940;LOC_Os01g34560;LOC_Os07g05365;LOC_Os05g49240;LOC_Os05g43880;LOC_Os02g41460;LOC_Os12g42280;LOC_Os12g17600;LOC_Os01g11150;LOC_Os03g44380;LOC_Os02g49480;LOC_Os01g22910;LOC_Os01g44390;LOC_Os02g35180;LOC_Os04g…
GO:0009723	response to ethylene	Biological Process	71	0.0118785	6.88608e-06	LOC_Os07g29330;LOC_Os01g42410;LOC_Os10g42130;LOC_Os01g08260;LOC_Os12g03150;LOC_Os07g48450;LOC_Os05g37470;LOC_Os03g52650;LOC_Os06g07030;LOC_Os08g35210;LOC_Os05g34830;LOC_Os01g64360;LOC_Os11g42510;LOC_Os02g14490;LOC_Os12g07640;LOC_Os09g25090;LOC_Os07g15370;LOC_Os11g13670;LOC_Os03g13200;LOC_Os11g03440;LOC_Os08g38460;LOC_Os01g07500;LOC_Os11g42800;LOC_Os02g43560;LOC_Os06g51260;LOC_Os01g09830;LOC_Os11g…
GO:0009862	systemic acquired resistance, salicylic acid mediated signaling pathway	Biological Process	72	0.0119416	6.92266e-06	LOC_Os12g24020;LOC_Os03g21710;LOC_Os04g59370;LOC_Os11g07460;LOC_Os10g42130;LOC_Os01g42410;LOC_Os08g05520;LOC_Os01g02600;LOC_Os01g08260;LOC_Os08g39830;LOC_Os02g42380;LOC_Os05g25260;LOC_Os07g18240;LOC_Os05g34830;LOC_Os03g28330;LOC_Os04g08280;LOC_Os02g15750;LOC_Os01g36460;LOC_Os01g20860;LOC_Os03g08930;LOC_Os01g32770;LOC_Os07g48450;LOC_Os03g18960;LOC_Os03g52650;LOC_Os12g35610;LOC_Os11g02540;LOC_Os06g…
GO:0030968	endoplasmic reticulum unfolded protein response	Biological Process	50	0.01297	7.51883e-06	LOC_Os03g21030;LOC_Os01g20860;LOC_Os04g47420;LOC_Os02g49950;LOC_Os03g10080;LOC_Os07g48450;LOC_Os03g52650;LOC_Os12g39120;LOC_Os01g66490;LOC_Os09g19710;LOC_Os05g34830;LOC_Os01g01430;LOC_Os08g39830;LOC_Os03g20650;LOC_Os05g25260;LOC_Os07g18240;LOC_Os02g06140;LOC_Os04g49490;LOC_Os04g47300;LOC_Os04g44850;LOC_Os10g42130;LOC_Os01g55150;LOC_Os01g64730;LOC_Os02g51930;LOC_Os05g10670;LOC_Os01g09830;LOC_Os02g…
GO:1901576	organic substance biosynthetic process	Biological Process	100	0.0131716	7.63568e-06	LOC_Os07g38290;LOC_Os04g51980;LOC_Os03g04220;LOC_Os01g19480;LOC_Os01g58640;LOC_Os04g53950;LOC_Os12g12120;LOC_Os06g48560;LOC_Os05g45090;LOC_Os03g54910;LOC_Os06g46920;LOC_Os06g07941;LOC_Os07g35140;LOC_Os11g36160;LOC_Os05g26660;LOC_Os08g03020;LOC_Os12g08720;LOC_Os07g43560;LOC_Os04g14690;LOC_Os07g48680;LOC_Os07g32630;LOC_Os02g17730;LOC_Os01g18930;LOC_Os03g28040;LOC_Os09g38870;LOC_Os04g38810;LOC_Os07g…
GO:0043481	anthocyanin accumulation in tissues in response to UV light	Biological Process	42	0.0158233	9.17294e-06	LOC_Os04g48070;LOC_Os06g14810;LOC_Os05g43820;LOC_Os07g49390;LOC_Os07g02810;LOC_Os10g20710;LOC_Os05g37470;LOC_Os04g05050;LOC_Os05g34170;LOC_Os07g35880;LOC_Os06g22870;LOC_Os10g41550;LOC_Os10g31910;LOC_Os07g41310;LOC_Os12g40890;LOC_Os06g16300;LOC_Os02g46680;LOC_Os02g06140;LOC_Os03g54000;LOC_Os01g63580;LOC_Os01g34560;LOC_Os08g01140;LOC_Os07g32660;LOC_Os05g04600;LOC_Os06g01490;LOC_Os01g63770;LOC_Os10g…
GO:0007389	pattern specification process	Biological Process	37	0.0164059	9.51068e-06	LOC_Os01g42294;LOC_Os05g37600;LOC_Os03g58110;LOC_Os03g22040;LOC_Os07g05190;LOC_Os06g35200;LOC_Os06g43170;LOC_Os04g57630;LOC_Os01g63770;LOC_Os02g13520;LOC_Os03g57780;LOC_Os11g01620;LOC_Os03g03810;LOC_Os12g01700;LOC_Os07g06570;LOC_Os02g17710;LOC_Os06g05550;LOC_Os02g56540;LOC_Os02g06150;LOC_Os02g17730;LOC_Os06g49100;LOC_Os08g14940;LOC_Os02g41800;LOC_Os06g22870;LOC_Os03g50970;LOC_Os04g05050;LOC_Os01g…
GO:0007165	signal transduction	Biological Process	102	0.0169723	9.83899e-06	LOC_Os08g45060;LOC_Os07g30620;LOC_Os08g34580;LOC_Os01g09580;LOC_Os03g14050;LOC_Os01g23970;LOC_Os11g01620;LOC_Os04g58860;LOC_Os04g43710;LOC_Os02g43560;LOC_Os02g06090;LOC_Os04g33820;LOC_Os06g35200;LOC_Os11g01040;LOC_Os11g36000;LOC_Os10g38110;LOC_Os06g38970;LOC_Os02g40260;LOC_Os09g27450;LOC_Os07g46480;LOC_Os11g35450;LOC_Os10g05600;LOC_Os01g27230;LOC_Os07g37810;LOC_Os03g41390;LOC_Os05g02310;LOC_Os08g…
GO:2000280	regulation of root development	Biological Process	9	0.0181849	1.0542e-05	LOC_Os07g47450;LOC_Os12g39400;LOC_Os03g44880;LOC_Os03g58980;LOC_Os01g72290;LOC_Os05g19670;LOC_Os05g10830;LOC_Os01g70730;LOC_Os01g50900
GO:0009736	cytokinin-activated signaling pathway	Biological Process	27	0.0196478	1.139e-05	LOC_Os01g32920;LOC_Os08g07890;LOC_Os06g12460;LOC_Os02g35180;LOC_Os09g27060;LOC_Os12g04500;LOC_Os06g16300;LOC_Os01g74020;LOC_Os08g34380;LOC_Os02g10760;LOC_Os12g36100;LOC_Os09g27320;LOC_Os09g24810;LOC_Os01g10110;LOC_Os03g09170;LOC_Os12g39220;LOC_Os04g57720;LOC_Os11g04720;LOC_Os12g16220;LOC_Os08g31580;LOC_Os01g72330;LOC_Os05g49700;LOC_Os12g03110;LOC_Os04g36070;LOC_Os11g42800;LOC_Os05g40960;LOC_Os02g…
GO:0010075	regulation of meristem growth	Biological Process	48	0.020283	1.17583e-05	LOC_Os09g15170;LOC_Os03g04770;LOC_Os06g40080;LOC_Os02g12730;LOC_Os05g46350;LOC_Os08g39270;LOC_Os02g09740;LOC_Os02g41460;LOC_Os03g03810;LOC_Os08g07890;LOC_Os08g32500;LOC_Os09g35940;LOC_Os03g23960;LOC_Os08g34380;LOC_Os08g45060;LOC_Os03g58110;LOC_Os05g37600;LOC_Os01g42294;LOC_Os01g65790;LOC_Os11g06820;LOC_Os11g42800;LOC_Os04g39610;LOC_Os04g19740;LOC_Os10g32810;LOC_Os11g12530;LOC_Os01g63770;LOC_Os04g…
GO:0002215	defense response to nematode	Biological Process	12	0.0222229	1.28828e-05	LOC_Os12g02080;LOC_Os09g29490;LOC_Os03g22020;LOC_Os09g32964;LOC_Os02g14160;LOC_Os10g02040;LOC_Os01g10850;LOC_Os01g36240;LOC_Os01g16450;LOC_Os03g13200;LOC_Os07g48020;LOC_Os04g56180
GO:0010103	stomatal complex morphogenesis	Biological Process	36	0.0230026	1.33348e-05	LOC_Os10g25450;LOC_Os02g40440;LOC_Os06g16300;LOC_Os11g32100;LOC_Os02g19640;LOC_Os10g32580;LOC_Os12g43660;LOC_Os06g50900;LOC_Os03g02750;LOC_Os01g72700;LOC_Os03g55350;LOC_Os01g42900;LOC_Os04g48070;LOC_Os01g50370;LOC_Os02g10520;LOC_Os05g02890;LOC_Os01g70310;LOC_Os05g04170;LOC_Os11g35400;LOC_Os05g44200;LOC_Os04g03050;LOC_Os02g53840;LOC_Os07g05740;LOC_Os03g03570;LOC_Os02g57110;LOC_Os08g35760;LOC_Os01g…
GO:0009686	gibberellin biosynthetic process	Biological Process	24	0.023745	1.37652e-05	LOC_Os12g40920;LOC_Os04g09900;LOC_Os01g08220;LOC_Os03g19240;LOC_Os02g36140;LOC_Os01g25500;LOC_Os11g28530;LOC_Os12g03110;LOC_Os01g72210;LOC_Os01g32770;LOC_Os03g38170;LOC_Os03g28300;LOC_Os02g36210;LOC_Os07g48630;LOC_Os08g43600;LOC_Os03g03790;LOC_Os02g17780;LOC_Os03g63970;LOC_Os03g04130;LOC_Os06g46920;LOC_Os07g29330;LOC_Os05g34854;LOC_Os08g39830;LOC_Os02g36264
GO:0006694	steroid biosynthetic process	Biological Process	18	0.0263966	1.53024e-05	LOC_Os07g33440;LOC_Os01g04230;LOC_Os12g01700;LOC_Os05g35360;LOC_Os02g56860;LOC_Os11g01620;LOC_Os02g04760;LOC_Os05g47540;LOC_Os04g46130;LOC_Os07g02200;LOC_Os03g45619;LOC_Os10g33370;LOC_Os07g29960;LOC_Os09g25700;LOC_Os04g53860;LOC_Os08g38270;LOC_Os09g08720;LOC_Os09g25690
GO:0016049	cell growth	Biological Process	72	0.0277062	1.60616e-05	LOC_Os03g58350;LOC_Os08g38270;LOC_Os11g38860;LOC_Os01g48940;LOC_Os07g42420;LOC_Os02g01140;LOC_Os06g03670;LOC_Os02g06150;LOC_Os12g38810;LOC_Os02g40260;LOC_Os01g35330;LOC_Os04g38810;LOC_Os02g51860;LOC_Os06g07220;LOC_Os09g04710;LOC_Os01g72700;LOC_Os12g43660;LOC_Os11g07170;LOC_Os04g40440;LOC_Os07g49080;LOC_Os12g28770;LOC_Os11g35450;LOC_Os10g19180;LOC_Os07g07230;LOC_Os02g06090;LOC_Os06g35200;LOC_Os09g…
GO:0006816	calcium ion transport	Biological Process	32	0.028941	1.67774e-05	LOC_Os07g14850;LOC_Os01g34560;LOC_Os03g01820;LOC_Os08g39850;LOC_Os06g21570;LOC_Os04g39880;LOC_Os06g12460;LOC_Os04g43390;LOC_Os08g06550;LOC_Os07g41310;LOC_Os01g74450;LOC_Os01g41200;LOC_Os03g62090;LOC_Os08g39860;LOC_Os04g52440;LOC_Os07g41320;LOC_Os08g42350;LOC_Os02g10120;LOC_Os08g36680;LOC_Os04g51610;LOC_Os05g41670;LOC_Os02g01590;LOC_Os02g41710;LOC_Os09g07350;LOC_Os12g29220;LOC_Os07g26630;LOC_Os04g…
GO:0006469	negative regulation of protein kinase activity	Biological Process	7	0.0301098	1.7455e-05	LOC_Os03g16170;LOC_Os01g46760;LOC_Os01g40094;LOC_Os05g46040;LOC_Os05g49730;LOC_Os09g15670;LOC_Os05g38290
GO:0009939	positive regulation of gibberellic acid mediated signaling pathway	Biological Process	7	0.0301098	1.7455e-05	LOC_Os05g49730;LOC_Os11g13670;LOC_Os01g62760;LOC_Os01g46760;LOC_Os03g16170;LOC_Os05g38290;LOC_Os09g15670
GO:0070838	divalent metal ion transport	Biological Process	23	0.0334737	1.94051e-05	LOC_Os12g09300;LOC_Os03g43440;LOC_Os09g35630;LOC_Os07g04180;LOC_Os05g36050;LOC_Os12g32850;LOC_Os08g35760;LOC_Os10g40600;LOC_Os01g25540;LOC_Os06g45710;LOC_Os01g44110;LOC_Os07g01070;LOC_Os01g67950;LOC_Os01g25560;LOC_Os09g19710;LOC_Os08g36320;LOC_Os05g49170;LOC_Os05g44030;LOC_Os03g06520;LOC_Os03g09940;LOC_Os02g01210;LOC_Os12g08090;LOC_Os11g26880
GO:0006950	response to stress	Biological Process	132	0.0350989	2.03472e-05	LOC_Os06g07300;LOC_Os03g04680;LOC_Os04g39980;LOC_Os03g45619;LOC_Os08g28710;LOC_Os05g35380;LOC_Os01g06310;LOC_Os05g45350;LOC_Os03g19290;LOC_Os05g48810;LOC_Os07g40940;LOC_Os06g46680;LOC_Os11g11410;LOC_Os07g07410;LOC_Os02g51680;LOC_Os04g45720;LOC_Os10g37660;LOC_Os04g47420;LOC_Os07g37230;LOC_Os07g25810;LOC_Os03g60580;LOC_Os12g31710;LOC_Os03g02260;LOC_Os08g34720;LOC_Os10g38780;LOC_Os01g57420;LOC_Os05g…
GO:0045493	xylan catabolic process	Biological Process	11	0.0391832	2.27149e-05	LOC_Os02g51620;LOC_Os03g47010;LOC_Os03g10478;LOC_Os06g25010;LOC_Os01g19220;LOC_Os11g03780;LOC_Os06g24990;LOC_Os11g18730;LOC_Os11g19210;LOC_Os06g46340;LOC_Os04g54810
GO:0031348	negative regulation of defense response	Biological Process	65	0.0403858	2.3412e-05	LOC_Os08g39830;LOC_Os05g25260;LOC_Os02g42380;LOC_Os04g59370;LOC_Os11g07460;LOC_Os03g21710;LOC_Os01g08260;LOC_Os08g05520;LOC_Os01g66510;LOC_Os01g02600;LOC_Os10g42130;LOC_Os01g42410;LOC_Os03g08930;LOC_Os01g20860;LOC_Os01g36460;LOC_Os02g15750;LOC_Os03g18960;LOC_Os07g48450;LOC_Os04g08280;LOC_Os06g48300;LOC_Os05g34830;LOC_Os12g07640;LOC_Os01g66740;LOC_Os02g36890;LOC_Os12g35610;LOC_Os08g03020;LOC_Os06g…
GO:0042542	response to hydrogen peroxide	Biological Process	50	0.0454546	2.63505e-05	LOC_Os03g13540;LOC_Os05g41490;LOC_Os10g07200;LOC_Os03g14180;LOC_Os05g41670;LOC_Os04g28420;LOC_Os03g16920;LOC_Os02g52150;LOC_Os02g57560;LOC_Os04g01740;LOC_Os03g02260;LOC_Os01g58850;LOC_Os02g13800;LOC_Os01g08860;LOC_Os12g01530;LOC_Os01g36790;LOC_Os06g46900;LOC_Os02g54140;LOC_Os06g35960;LOC_Os03g15960;LOC_Os04g37990;LOC_Os03g20120;LOC_Os09g17630;LOC_Os03g16030;LOC_Os11g01530;LOC_Os01g68960;LOC_Os04g…
GO:0019375	galactolipid biosynthetic process	Biological Process	31	0.0481735	2.79267e-05	LOC_Os01g56560;LOC_Os07g06470;LOC_Os01g11340;LOC_Os09g32670;LOC_Os03g43440;LOC_Os10g38710;LOC_Os04g24430;LOC_Os01g47400;LOC_Os12g41090;LOC_Os03g22120;LOC_Os09g25090;LOC_Os06g04200;LOC_Os01g52230;LOC_Os02g58480;LOC_Os03g13540;LOC_Os01g49720;LOC_Os03g28330;LOC_Os03g03510;LOC_Os09g25100;LOC_Os03g48970;LOC_Os06g40120;LOC_Os10g38470;LOC_Os10g38780;LOC_Os01g20860;LOC_Os11g05410;LOC_Os07g22930;LOC_Os02g…
GO:0046470	phosphatidylcholine metabolic process	Biological Process	7	0.0485755	2.81597e-05	LOC_Os08g31060;LOC_Os06g40170;LOC_Os06g40180;LOC_Os03g02740;LOC_Os06g40500;LOC_Os01g20860;LOC_Os03g27370
GO:0051504	diterpene phytoalexin precursor biosynthetic process pathway	Biological Process	8	0.0546844	3.17011e-05	LOC_Os02g17780;LOC_Os03g61740;LOC_Os04g10000;LOC_Os07g46930;LOC_Os07g46940;LOC_Os04g10010;LOC_Os02g36210;LOC_Os04g09900
GO:0009685	gibberellin metabolic process	Biological Process	8	0.0546844	3.17011e-05	LOC_Os05g34854;LOC_Os11g28530;LOC_Os02g41954;LOC_Os02g36264;LOC_Os01g08220;LOC_Os02g36210;LOC_Os07g01340;LOC_Os04g09900
GO:0009834	plant-type secondary cell wall biogenesis	Biological Process	23	0.0576135	3.33991e-05	LOC_Os07g48830;LOC_Os01g46350;LOC_Os10g42130;LOC_Os07g14850;LOC_Os01g36580;LOC_Os07g34070;LOC_Os03g62090;LOC_Os06g04090;LOC_Os03g18110;LOC_Os11g48060;LOC_Os02g52930;LOC_Os08g10080;LOC_Os08g01330;LOC_Os01g51260;LOC_Os03g05530;LOC_Os01g10370;LOC_Os06g01972;LOC_Os07g41320;LOC_Os06g07030;LOC_Os10g38000;LOC_Os05g33900;LOC_Os03g21030;LOC_Os01g11810
GO:0000165	MAPK cascade	Biological Process	60	0.0639738	3.70862e-05	LOC_Os01g01430;LOC_Os05g25770;LOC_Os04g47300;LOC_Os02g06140;LOC_Os12g33070;LOC_Os07g02780;LOC_Os03g21030;LOC_Os01g65370;LOC_Os02g49950;LOC_Os01g66490;LOC_Os09g23620;LOC_Os07g37210;LOC_Os03g20550;LOC_Os03g58320;LOC_Os02g50330;LOC_Os01g55940;LOC_Os07g40290;LOC_Os01g02400;LOC_Os12g03040;LOC_Os02g49986;LOC_Os01g02370;LOC_Os01g02580;LOC_Os01g02560;LOC_Os07g18230;LOC_Os03g60080;LOC_Os07g48630;LOC_Os01g…
GO:0040008	regulation of growth	Biological Process	15	0.0648069	3.75692e-05	LOC_Os02g17710;LOC_Os06g39880;LOC_Os10g38800;LOC_Os11g42450;LOC_Os01g51400;LOC_Os03g02240;LOC_Os06g49100;LOC_Os02g06150;LOC_Os02g58390;LOC_Os03g21730;LOC_Os04g59190;LOC_Os06g28480;LOC_Os03g03570;LOC_Os12g01700;LOC_Os01g72700
GO:0000038	very long-chain fatty acid metabolic process	Biological Process	16	0.0758952	4.39972e-05	LOC_Os03g44740;LOC_Os10g33370;LOC_Os05g44200;LOC_Os06g44300;LOC_Os06g14810;LOC_Os06g05550;LOC_Os03g56820;LOC_Os12g43363;LOC_Os01g63580;LOC_Os06g24180;LOC_Os07g42420;LOC_Os06g29180;LOC_Os02g56860;LOC_Os01g52770;LOC_Os01g34560;LOC_Os05g37600
GO:0044711	single-organism biosynthetic process	Biological Process	33	0.079513	4.60945e-05	LOC_Os01g52160;LOC_Os02g49850;LOC_Os09g34214;LOC_Os03g04250;LOC_Os04g39980;LOC_Os01g43270;LOC_Os04g14690;LOC_Os01g51400;LOC_Os01g53420;LOC_Os01g50370;LOC_Os12g04080;LOC_Os01g53330;LOC_Os10g37340;LOC_Os06g44310;LOC_Os09g37050;LOC_Os03g04570;LOC_Os01g57690;LOC_Os06g15370;LOC_Os01g05840;LOC_Os02g28220;LOC_Os06g02900;LOC_Os04g45690;LOC_Os01g55240;LOC_Os02g41954;LOC_Os07g42520;LOC_Os03g02400;LOC_Os08g…
GO:0009644	response to high light intensity	Biological Process	49	0.0815318	4.72648e-05	LOC_Os07g05365;LOC_Os02g54140;LOC_Os06g46900;LOC_Os01g36790;LOC_Os01g58850;LOC_Os02g13800;LOC_Os08g39850;LOC_Os01g08860;LOC_Os09g17630;LOC_Os03g20120;LOC_Os04g37990;LOC_Os04g02050;LOC_Os06g35960;LOC_Os03g15960;LOC_Os02g10120;LOC_Os04g28420;LOC_Os03g16920;LOC_Os02g52150;LOC_Os03g14180;LOC_Os10g07200;LOC_Os05g41490;LOC_Os08g39840;LOC_Os01g12580;LOC_Os04g01740;LOC_Os03g02260;LOC_Os03g11910;LOC_Os01g…
GO:0009860	pollen tube growth	Biological Process	69	0.0818474	4.74478e-05	LOC_Os05g04710;LOC_Os03g52650;LOC_Os04g52320;LOC_Os02g41710;LOC_Os03g11600;LOC_Os10g36650;LOC_Os06g48300;LOC_Os05g25350;LOC_Os01g46400;LOC_Os05g15850;LOC_Os10g40600;LOC_Os01g66510;LOC_Os04g39880;LOC_Os07g07990;LOC_Os05g44070;LOC_Os05g34010;LOC_Os05g49300;LOC_Os11g05320;LOC_Os04g33740;LOC_Os05g44030;LOC_Os04g55850;LOC_Os12g06660;LOC_Os03g58110;LOC_Os04g52440;LOC_Os02g35660;LOC_Os01g42090;LOC_Os06g…
GO:0048838	release of seed from dormancy	Biological Process	6	0.0859928	4.98509e-05	LOC_Os01g46760;LOC_Os09g15670;LOC_Os03g16170;LOC_Os05g49730;LOC_Os05g38290;LOC_Os01g62760
GO:0046274	lignin catabolic process	Biological Process	10	0.0880909	5.10672e-05	LOC_Os11g48060;LOC_Os01g62490;LOC_Os03g16610;LOC_Os01g62600;LOC_Os11g42220;LOC_Os05g38390;LOC_Os07g01110;LOC_Os12g01730;LOC_Os12g15530;LOC_Os01g63180
GO:0010205	photoinhibition	Biological Process	9	0.0897184	5.20107e-05	LOC_Os01g46760;LOC_Os03g16170;LOC_Os05g49730;LOC_Os05g46040;LOC_Os01g40094;LOC_Os09g15670;LOC_Os05g50750;LOC_Os05g38290;LOC_Os06g12370
GO:0048829	root cap development	Biological Process	18	0.0898761	5.21021e-05	LOC_Os05g50750;LOC_Os05g30820;LOC_Os03g14370;LOC_Os10g42130;LOC_Os01g12660;LOC_Os03g43670;LOC_Os02g41800;LOC_Os03g40100;LOC_Os11g06820;LOC_Os03g21030;LOC_Os01g63770;LOC_Os04g32110;LOC_Os06g04090;LOC_Os05g37470;LOC_Os08g01330;LOC_Os01g55260;LOC_Os08g28710;LOC_Os08g10080
GO:0015824	proline transport	Biological Process	25	0.0943918	5.47199e-05	LOC_Os01g11160;LOC_Os01g21034;LOC_Os10g38710;LOC_Os01g49710;LOC_Os06g49220;LOC_Os10g02100;LOC_Os12g12514;LOC_Os01g56560;LOC_Os02g50340;LOC_Os07g01070;LOC_Os12g12470;LOC_Os04g37710;LOC_Os05g25770;LOC_Os12g06060;LOC_Os10g38360;LOC_Os03g10620;LOC_Os01g49720;LOC_Os05g49700;LOC_Os08g33710;LOC_Os11g05410;LOC_Os10g38730;LOC_Os06g07030;LOC_Os03g04570;LOC_Os10g38780;LOC_Os10g38470
GO:0009416	response to light stimulus	Biological Process	52	0.102069	5.91706e-05	LOC_Os01g08130;LOC_Os11g03440;LOC_Os01g62760;LOC_Os03g13200;LOC_Os03g60080;LOC_Os02g46910;LOC_Os06g11330;LOC_Os11g03300;LOC_Os01g43750;LOC_Os05g08530;LOC_Os03g02610;LOC_Os07g40290;LOC_Os12g03040;LOC_Os01g55940;LOC_Os07g23570;LOC_Os12g35350;LOC_Os08g42690;LOC_Os03g60560;LOC_Os08g36480;LOC_Os04g49700;LOC_Os02g53130;LOC_Os01g19480;LOC_Os12g39320;LOC_Os08g34720;LOC_Os06g44160;LOC_Os12g06660;LOC_Os03g…
GO:0009697	salicylic acid biosynthetic process	Biological Process	61	0.123467	7.1575e-05	LOC_Os01g72460;LOC_Os03g50960;LOC_Os04g51610;LOC_Os07g47590;LOC_Os01g02790;LOC_Os06g14670;LOC_Os07g03870;LOC_Os07g04040;LOC_Os03g55850;LOC_Os01g02570;LOC_Os03g44810;LOC_Os12g35610;LOC_Os03g01300;LOC_Os03g24930;LOC_Os12g07640;LOC_Os02g36890;LOC_Os11g42510;LOC_Os07g35730;LOC_Os04g08280;LOC_Os02g15750;LOC_Os01g36460;LOC_Os03g52650;LOC_Os06g43600;LOC_Os04g59370;LOC_Os03g21710;LOC_Os06g07220;LOC_Os01g…
GO:0044237	cellular metabolic process	Biological Process	85	0.12676	7.34842e-05	LOC_Os05g31280;LOC_Os03g14654;LOC_Os09g31522;LOC_Os12g17570;LOC_Os10g28080;LOC_Os07g41060;LOC_Os09g08720;LOC_Os01g53820;LOC_Os02g50690;LOC_Os03g08790;LOC_Os05g04380;LOC_Os03g12820;LOC_Os12g43720;LOC_Os11g08100;LOC_Os06g15370;LOC_Os07g40690;LOC_Os01g57690;LOC_Os05g50990;LOC_Os07g14600;LOC_Os08g31200;LOC_Os02g53840;LOC_Os03g38470;LOC_Os06g39880;LOC_Os12g38170;LOC_Os01g61570;LOC_Os03g05900;LOC_Os02g…
GO:0009734	auxin-activated signaling pathway	Biological Process	32	0.138763	8.04422e-05	LOC_Os05g37470;LOC_Os05g43820;LOC_Os03g58350;LOC_Os02g41800;LOC_Os06g22870;LOC_Os01g66890;LOC_Os09g37480;LOC_Os09g37500;LOC_Os02g06140;LOC_Os12g40890;LOC_Os04g55950;LOC_Os07g34070;LOC_Os01g53880;LOC_Os11g11410;LOC_Os12g43110;LOC_Os04g40630;LOC_Os06g04590;LOC_Os01g63770;LOC_Os05g33900;LOC_Os09g25810;LOC_Os11g05320;LOC_Os07g02540;LOC_Os11g06820;LOC_Os03g05530;LOC_Os07g40290;LOC_Os08g35110;LOC_Os01g…
GO:0006972	hyperosmotic response	Biological Process	32	0.138763	8.04422e-05	LOC_Os05g25350;LOC_Os01g65550;LOC_Os01g73980;LOC_Os07g41310;LOC_Os01g44130;LOC_Os04g48930;LOC_Os04g08350;LOC_Os02g34600;LOC_Os12g10660;LOC_Os02g48450;LOC_Os12g06270;LOC_Os01g12520;LOC_Os04g57440;LOC_Os05g34170;LOC_Os05g01810;LOC_Os03g17760;LOC_Os01g74450;LOC_Os04g02050;LOC_Os02g54140;LOC_Os06g21250;LOC_Os01g08860;LOC_Os04g19740;LOC_Os07g26630;LOC_Os09g08720;LOC_Os04g01740;LOC_Os11g05290;LOC_Os01g…
GO:0010226	response to lithium ion	Biological Process	6	0.142964	8.28775e-05	LOC_Os01g52770;LOC_Os05g44200;LOC_Os10g32580;LOC_Os02g57110;LOC_Os06g14630;LOC_Os02g40440
GO:0080029	cellular response to boron-containing substance levels	Biological Process	6	0.142964	8.28775e-05	LOC_Os10g36924;LOC_Os01g08020;LOC_Os02g13870;LOC_Os12g37840;LOC_Os06g12310;LOC_Os02g51110
GO:0009759	indole glucosinolate biosynthetic process	Biological Process	16	0.152925	8.8652e-05	LOC_Os02g36890;LOC_Os02g49986;LOC_Os05g04820;LOC_Os01g65370;LOC_Os12g07640;LOC_Os01g36460;LOC_Os11g03440;LOC_Os12g03150;LOC_Os03g25550;LOC_Os09g23620;LOC_Os08g05520;LOC_Os06g14670;LOC_Os07g37210;LOC_Os08g33660;LOC_Os01g51260;LOC_Os12g33070
GO:0009684	indoleacetic acid biosynthetic process	Biological Process	27	0.161049	9.33616e-05	LOC_Os11g42510;LOC_Os04g02050;LOC_Os07g02120;LOC_Os07g48060;LOC_Os05g45240;LOC_Os03g18600;LOC_Os07g02100;LOC_Os04g08350;LOC_Os12g32850;LOC_Os01g36240;LOC_Os03g13200;LOC_Os04g44850;LOC_Os01g07500;LOC_Os12g07150;LOC_Os06g23684;LOC_Os09g32670;LOC_Os10g02040;LOC_Os02g49480;LOC_Os01g06640;LOC_Os12g38770;LOC_Os10g38470;LOC_Os03g06520;LOC_Os03g09940;LOC_Os01g12490;LOC_Os05g12580;LOC_Os10g38360;LOC_Os03g…
GO:0050789	regulation of biological process	Biological Process	74	0.164534	9.53818e-05	LOC_Os01g58640;LOC_Os07g44410;LOC_Os11g46000;LOC_Os07g07040;LOC_Os04g12499;LOC_Os02g45930;LOC_Os04g32030;LOC_Os05g02770;LOC_Os05g43870;LOC_Os09g37600;LOC_Os01g11660;LOC_Os01g08130;LOC_Os07g10840;LOC_Os01g44069;LOC_Os12g29160;LOC_Os03g08520;LOC_Os03g11950;LOC_Os02g34490;LOC_Os01g12520;LOC_Os11g42960;LOC_Os05g11210;LOC_Os01g58280;LOC_Os12g43510;LOC_Os10g26150;LOC_Os08g16030;LOC_Os01g53420;LOC_Os02g…
GO:0005975	carbohydrate metabolic process	Biological Process	69	0.166811	9.67023e-05	LOC_Os10g07290;LOC_Os02g46910;LOC_Os01g05840;LOC_Os03g02610;LOC_Os05g35360;LOC_Os07g35480;LOC_Os10g28080;LOC_Os07g38790;LOC_Os03g28300;LOC_Os01g39830;LOC_Os03g49610;LOC_Os08g14700;LOC_Os07g35560;LOC_Os03g51240;LOC_Os01g71474;LOC_Os04g43390;LOC_Os10g28050;LOC_Os09g36280;LOC_Os01g19170;LOC_Os06g24990;LOC_Os01g47400;LOC_Os04g30800;LOC_Os01g08780;LOC_Os02g51620;LOC_Os12g36810;LOC_Os07g35510;LOC_Os06g…
GO:0009624	response to nematode	Biological Process	46	0.171002	9.91317e-05	LOC_Os11g06820;LOC_Os08g36680;LOC_Os02g21009;LOC_Os02g02450;LOC_Os11g05690;LOC_Os04g51610;LOC_Os07g26630;LOC_Os12g08090;LOC_Os02g41780;LOC_Os05g34010;LOC_Os05g04600;LOC_Os01g61940;LOC_Os01g17214;LOC_Os01g63770;LOC_Os06g15370;LOC_Os01g21034;LOC_Os12g12934;LOC_Os03g60850;LOC_Os02g09740;LOC_Os04g54930;LOC_Os10g02100;LOC_Os07g15370;LOC_Os10g20470;LOC_Os11g04060;LOC_Os05g02890;LOC_Os03g42830;LOC_Os02g…
GO:0009788	negative regulation of abscisic acid-activated signaling pathway	Biological Process	23	0.172577	0.000100044	LOC_Os01g46760;LOC_Os05g46040;LOC_Os03g20870;LOC_Os08g31580;LOC_Os12g07030;LOC_Os07g42510;LOC_Os05g34830;LOC_Os05g43820;LOC_Os02g43330;LOC_Os05g49730;LOC_Os09g15670;LOC_Os05g38290;LOC_Os03g11550;LOC_Os05g49700;LOC_Os01g40094;LOC_Os01g62760;LOC_Os03g60080;LOC_Os06g40150;LOC_Os03g16170;LOC_Os02g10760;LOC_Os07g29330;LOC_Os03g07450;LOC_Os09g27060
GO:0006949	syncytium formation	Biological Process	10	0.177663	0.000102993	LOC_Os11g26880;LOC_Os11g06820;LOC_Os01g60770;LOC_Os06g41700;LOC_Os05g37470;LOC_Os03g60720;LOC_Os02g42650;LOC_Os06g36560;LOC_Os01g63770;LOC_Os05g39990
GO:0001666	response to hypoxia	Biological Process	23	0.189509	0.00010986	LOC_Os02g58480;LOC_Os06g04200;LOC_Os01g01430;LOC_Os03g22120;LOC_Os04g24430;LOC_Os03g60080;LOC_Os08g06280;LOC_Os12g24020;LOC_Os11g03300;LOC_Os05g50550;LOC_Os01g32770;LOC_Os01g43590;LOC_Os10g25130;LOC_Os07g22930;LOC_Os03g21030;LOC_Os02g34970;LOC_Os06g11660;LOC_Os05g34830;LOC_Os03g28330;LOC_Os07g42510;LOC_Os03g20550;LOC_Os03g21060;LOC_Os01g66490
GO:0071669	plant-type cell wall organization or biogenesis	Biological Process	20	0.201957	0.000117076	LOC_Os09g04710;LOC_Os06g01966;LOC_Os01g72700;LOC_Os07g36690;LOC_Os09g23350;LOC_Os06g43044;LOC_Os05g33690;LOC_Os08g45060;LOC_Os03g20450;LOC_Os05g48900;LOC_Os10g38800;LOC_Os07g36630;LOC_Os08g34580;LOC_Os02g01140;LOC_Os03g40670;LOC_Os01g16310;LOC_Os11g12530;LOC_Os03g64170;LOC_Os01g61570;LOC_Os11g42450
GO:0009605	response to external stimulus	Biological Process	28	0.216996	0.000125795	LOC_Os01g11150;LOC_Os10g32580;LOC_Os03g13570;LOC_Os03g02750;LOC_Os02g54640;LOC_Os03g55350;LOC_Os06g11330;LOC_Os02g46910;LOC_Os03g56950;LOC_Os05g33690;LOC_Os10g25450;LOC_Os08g42840;LOC_Os06g39960;LOC_Os09g25980;LOC_Os02g53840;LOC_Os03g02610;LOC_Os09g16950;LOC_Os07g05190;LOC_Os02g10520;LOC_Os04g48416;LOC_Os02g17730;LOC_Os10g02770;LOC_Os03g58350;LOC_Os09g25060;LOC_Os11g12530;LOC_Os01g64860;LOC_Os09g…
GO:0031222	arabinan catabolic process	Biological Process	5	0.239729	0.000138973	LOC_Os11g19210;LOC_Os04g54810;LOC_Os02g51620;LOC_Os11g18730;LOC_Os01g19220
GO:0010193	response to ozone	Biological Process	24	0.251076	0.000145551	LOC_Os05g25350;LOC_Os09g17630;LOC_Os05g25770;LOC_Os02g40900;LOC_Os07g08350;LOC_Os11g35400;LOC_Os05g17604;LOC_Os01g08260;LOC_Os01g36790;LOC_Os01g42410;LOC_Os01g43460;LOC_Os01g28840;LOC_Os08g39850;LOC_Os07g46990;LOC_Os05g03920;LOC_Os11g06880;LOC_Os08g39840;LOC_Os08g43120;LOC_Os08g10300;LOC_Os03g28300;LOC_Os02g10120;LOC_Os05g04170;LOC_Os03g20550;LOC_Os08g10310
GO:1901617	organic hydroxy compound biosynthetic process	Biological Process	10	0.272781	0.000158134	LOC_Os03g18030;LOC_Os02g17940;LOC_Os01g08220;LOC_Os01g66740;LOC_Os10g18820;LOC_Os04g52260;LOC_Os12g09770;LOC_Os07g42520;LOC_Os04g48930;LOC_Os11g07670
GO:0065007	biological regulation	Biological Process	28	0.273104	0.000158321	LOC_Os02g50690;LOC_Os01g47780;LOC_Os07g10910;LOC_Os01g51890;LOC_Os03g42830;LOC_Os11g26880;LOC_Os04g51980;LOC_Os05g19910;LOC_Os10g35950;LOC_Os01g47050;LOC_Os06g02040;LOC_Os09g25690;LOC_Os02g28220;LOC_Os05g48900;LOC_Os04g46990;LOC_Os11g07960;LOC_Os05g45090;LOC_Os11g07670;LOC_Os06g49660;LOC_Os06g50950;LOC_Os02g58530;LOC_Os09g35600;LOC_Os01g25484;LOC_Os09g37200;LOC_Os10g11980;LOC_Os01g20830;LOC_Os04g…
GO:0071456	cellular response to hypoxia	Biological Process	20	0.274991	0.000159415	LOC_Os06g48030;LOC_Os02g13800;LOC_Os04g56180;LOC_Os03g08460;LOC_Os08g36920;LOC_Os01g55940;LOC_Os07g48060;LOC_Os06g35960;LOC_Os07g40290;LOC_Os03g02920;LOC_Os01g22230;LOC_Os09g29690;LOC_Os10g39170;LOC_Os12g02080;LOC_Os06g46799;LOC_Os04g59150;LOC_Os12g41060;LOC_Os03g53340;LOC_Os07g48020;LOC_Os04g14690
GO:0010439	regulation of glucosinolate biosynthetic process	Biological Process	14	0.292817	0.000169749	LOC_Os04g42950;LOC_Os01g65370;LOC_Os12g07640;LOC_Os05g04820;LOC_Os02g49986;LOC_Os02g36890;LOC_Os08g33660;LOC_Os03g25550;LOC_Os12g03150;LOC_Os11g03440;LOC_Os07g37210;LOC_Os06g14670;LOC_Os08g05520;LOC_Os09g23620
GO:0006869	lipid transport	Biological Process	23	0.298326	0.000172943	LOC_Os07g01070;LOC_Os11g02350;LOC_Os10g02100;LOC_Os03g01300;LOC_Os12g12934;LOC_Os03g02390;LOC_Os08g06550;LOC_Os11g24070;LOC_Os01g12660;LOC_Os06g49220;LOC_Os01g62980;LOC_Os02g44320;LOC_Os12g02320;LOC_Os03g04570;LOC_Os05g34010;LOC_Os01g55260;LOC_Os07g48160;LOC_Os03g01320;LOC_Os06g43600;LOC_Os01g47050;LOC_Os03g50960;LOC_Os10g40420;LOC_Os03g37960
GO:0010119	regulation of stomatal movement	Biological Process	35	0.301104	0.000174553	LOC_Os01g40094;LOC_Os01g62760;LOC_Os06g21250;LOC_Os12g35610;LOC_Os03g48310;LOC_Os03g17760;LOC_Os05g46040;LOC_Os09g31522;LOC_Os01g46760;LOC_Os02g51890;LOC_Os07g41060;LOC_Os01g45274;LOC_Os09g08720;LOC_Os05g38290;LOC_Os01g60770;LOC_Os11g05320;LOC_Os03g60720;LOC_Os10g40600;LOC_Os02g34600;LOC_Os10g41490;LOC_Os03g08560;LOC_Os04g47300;LOC_Os01g65550;LOC_Os01g74020;LOC_Os06g41700;LOC_Os03g16170;LOC_Os02g…
GO:0009755	hormone-mediated signaling pathway	Biological Process	58	0.306287	0.000177557	LOC_Os12g10870;LOC_Os07g05740;LOC_Os02g44654;LOC_Os03g03570;LOC_Os07g48160;LOC_Os07g44950;LOC_Os04g57630;LOC_Os01g50400;LOC_Os10g38780;LOC_Os11g12530;LOC_Os03g28300;LOC_Os02g34970;LOC_Os03g21730;LOC_Os09g16950;LOC_Os05g46750;LOC_Os07g05190;LOC_Os08g42840;LOC_Os04g47250;LOC_Os07g31500;LOC_Os07g02780;LOC_Os12g40010;LOC_Os01g50370;LOC_Os08g02990;LOC_Os03g61670;LOC_Os09g25060;LOC_Os07g05460;LOC_Os07g…
GO:0009845	seed germination	Biological Process	52	0.316172	0.000183288	LOC_Os01g65370;LOC_Os11g42450;LOC_Os02g21090;LOC_Os01g10320;LOC_Os03g43670;LOC_Os03g09170;LOC_Os09g23620;LOC_Os07g37210;LOC_Os01g47400;LOC_Os11g32100;LOC_Os10g40960;LOC_Os07g48870;LOC_Os09g23300;LOC_Os01g45090;LOC_Os04g32110;LOC_Os12g03110;LOC_Os01g53640;LOC_Os11g45740;LOC_Os03g20090;LOC_Os12g07030;LOC_Os01g44110;LOC_Os08g36920;LOC_Os02g49986;LOC_Os03g17760;LOC_Os06g40150;LOC_Os12g37970;LOC_Os06g…
GO:0010476	gibberellin mediated signaling pathway	Biological Process	6	0.344133	0.000199497	LOC_Os09g28280;LOC_Os03g15270;LOC_Os12g04150;LOC_Os09g28640;LOC_Os08g43430;LOC_Os07g41590
GO:0046777	protein autophosphorylation	Biological Process	78	0.348768	0.000202184	LOC_Os04g36070;LOC_Os08g10300;LOC_Os02g49950;LOC_Os03g45210;LOC_Os03g03510;LOC_Os03g43670;LOC_Os07g37850;LOC_Os04g47300;LOC_Os10g25550;LOC_Os06g36810;LOC_Os02g42620;LOC_Os11g42410;LOC_Os05g36050;LOC_Os07g02780;LOC_Os11g29420;LOC_Os04g51040;LOC_Os01g26300;LOC_Os05g30820;LOC_Os05g03920;LOC_Os01g53640;LOC_Os03g28300;LOC_Os01g02780;LOC_Os11g12530;LOC_Os03g62314;LOC_Os02g57560;LOC_Os07g34980;LOC_Os05g…
GO:0009694	jasmonic acid metabolic process	Biological Process	20	0.370333	0.000214686	LOC_Os08g36920;LOC_Os01g55240;LOC_Os03g04680;LOC_Os04g47250;LOC_Os02g35660;LOC_Os01g63540;LOC_Os01g11150;LOC_Os10g34230;LOC_Os01g22910;LOC_Os05g43880;LOC_Os06g40150;LOC_Os02g44654;LOC_Os10g39750;LOC_Os07g05460;LOC_Os05g31040;LOC_Os04g28280;LOC_Os12g07030;LOC_Os01g10110;LOC_Os10g38110;LOC_Os03g09170
GO:0048653	anther development	Biological Process	38	0.389424	0.000225753	LOC_Os07g07990;LOC_Os04g52780;LOC_Os07g41060;LOC_Os09g08720;LOC_Os02g06090;LOC_Os09g31522;LOC_Os02g51890;LOC_Os07g05190;LOC_Os03g58110;LOC_Os03g21730;LOC_Os10g33250;LOC_Os04g56170;LOC_Os01g63930;LOC_Os03g17760;LOC_Os08g34380;LOC_Os07g05740;LOC_Os03g03570;LOC_Os08g07890;LOC_Os02g09740;LOC_Os02g44654;LOC_Os01g27140;LOC_Os04g59150;LOC_Os04g53860;LOC_Os11g42450;LOC_Os01g20780;LOC_Os02g17730;LOC_Os06g…
GO:0009407	toxin catabolic process	Biological Process	40	0.392014	0.000227255	LOC_Os10g38780;LOC_Os05g04600;LOC_Os10g38730;LOC_Os02g43560;LOC_Os11g45740;LOC_Os07g44410;LOC_Os01g49720;LOC_Os10g38360;LOC_Os01g20206;LOC_Os07g42510;LOC_Os09g35790;LOC_Os12g07030;LOC_Os12g37690;LOC_Os04g52440;LOC_Os03g20090;LOC_Os03g08460;LOC_Os02g45620;LOC_Os08g36920;LOC_Os06g35960;LOC_Os10g40360;LOC_Os02g13800;LOC_Os04g54930;LOC_Os12g12514;LOC_Os01g11340;LOC_Os10g38710;LOC_Os01g49710;LOC_Os12g…
GO:0046713	borate transport	Biological Process	5	0.418121	0.000242389	LOC_Os02g51110;LOC_Os01g08020;LOC_Os02g13870;LOC_Os12g37840;LOC_Os06g12310
GO:0044242	cellular lipid catabolic process	Biological Process	7	0.447717	0.000259546	LOC_Os08g36500;LOC_Os01g11160;LOC_Os02g02400;LOC_Os12g06060;LOC_Os08g36480;LOC_Os10g25130;LOC_Os02g53130
GO:0010029	regulation of seed germination	Biological Process	20	0.448977	0.000260277	LOC_Os02g42380;LOC_Os01g74020;LOC_Os12g04500;LOC_Os03g17760;LOC_Os03g56950;LOC_Os10g41490;LOC_Os02g34600;LOC_Os03g18600;LOC_Os01g40094;LOC_Os02g49480;LOC_Os02g35180;LOC_Os01g58850;LOC_Os05g40960;LOC_Os04g36070;LOC_Os01g72330;LOC_Os09g21120;LOC_Os04g57720;LOC_Os11g04720;LOC_Os05g41490;LOC_Os05g46040
GO:0009800	cinnamic acid biosynthetic process	Biological Process	19	0.477205	0.000276641	LOC_Os01g51260;LOC_Os06g14670;LOC_Os12g37690;LOC_Os07g37210;LOC_Os03g20090;LOC_Os03g25550;LOC_Os01g36460;LOC_Os05g04820;LOC_Os11g45740;LOC_Os12g33070;LOC_Os07g48870;LOC_Os08g33660;LOC_Os01g45090;LOC_Os08g05520;LOC_Os11g03440;LOC_Os12g03150;LOC_Os12g07640;LOC_Os04g42950;LOC_Os02g36890
GO:0006096	glycolytic process	Biological Process	50	0.481387	0.000279065	LOC_Os05g34170;LOC_Os05g01810;LOC_Os09g39910;LOC_Os05g03130;LOC_Os04g57440;LOC_Os10g06630;LOC_Os03g05310;LOC_Os02g48450;LOC_Os12g06270;LOC_Os09g29070;LOC_Os07g46990;LOC_Os01g71320;LOC_Os01g09460;LOC_Os04g08350;LOC_Os12g10660;LOC_Os02g34600;LOC_Os06g13720;LOC_Os06g45710;LOC_Os03g62090;LOC_Os05g25350;LOC_Os07g41310;LOC_Os01g73980;LOC_Os01g65550;LOC_Os01g44130;LOC_Os04g48930;LOC_Os01g72460;LOC_Os09g…
GO:0010143	cutin biosynthetic process	Biological Process	9	0.499024	0.00028929	LOC_Os02g10760;LOC_Os11g35400;LOC_Os01g63580;LOC_Os05g04170;LOC_Os01g44069;LOC_Os05g37600;LOC_Os06g40150;LOC_Os08g44840;LOC_Os10g33250
GO:0050826	response to freezing	Biological Process	23	0.49919	0.000289385	LOC_Os01g10320;LOC_Os04g32110;LOC_Os10g39750;LOC_Os03g37960;LOC_Os12g40920;LOC_Os03g60300;LOC_Os03g09170;LOC_Os03g43670;LOC_Os03g14370;LOC_Os01g70310;LOC_Os04g43200;LOC_Os05g28830;LOC_Os11g32100;LOC_Os05g25260;LOC_Os03g18120;LOC_Os08g43600;LOC_Os06g40150;LOC_Os03g40100;LOC_Os06g14370;LOC_Os11g01570;LOC_Os08g06550;LOC_Os12g01560;LOC_Os06g50900
GO:0048527	lateral root development	Biological Process	39	0.502633	0.000291381	LOC_Os12g40900;LOC_Os11g37260;LOC_Os04g54930;LOC_Os01g26210;LOC_Os10g38710;LOC_Os01g49710;LOC_Os06g20150;LOC_Os10g19200;LOC_Os04g29580;LOC_Os01g49720;LOC_Os10g38360;LOC_Os03g58110;LOC_Os10g38780;LOC_Os05g04600;LOC_Os04g38780;LOC_Os10g38730;LOC_Os07g07990;LOC_Os02g43560;LOC_Os02g02120;LOC_Os04g51040;LOC_Os01g26300;LOC_Os07g49080;LOC_Os10g41490;LOC_Os02g34600;LOC_Os04g29680;LOC_Os01g50820;LOC_Os02g…
GO:0012501	programmed cell death	Biological Process	17	0.519139	0.00030095	LOC_Os01g09460;LOC_Os04g30030;LOC_Os03g05560;LOC_Os09g21120;LOC_Os08g32060;LOC_Os07g35730;LOC_Os02g54830;LOC_Os01g23970;LOC_Os03g57080;LOC_Os01g71320;LOC_Os07g43560;LOC_Os08g34550;LOC_Os07g35630;LOC_Os07g35750;LOC_Os07g35004;LOC_Os10g17960;LOC_Os02g42620
GO:0048831	regulation of shoot system development	Biological Process	11	0.54029	0.000313212	LOC_Os04g36070;LOC_Os10g41550;LOC_Os11g04720;LOC_Os07g35880;LOC_Os04g57720;LOC_Os10g32810;LOC_Os12g04500;LOC_Os03g04770;LOC_Os02g14490;LOC_Os01g72330;LOC_Os02g35180
GO:0010310	regulation of hydrogen peroxide metabolic process	Biological Process	50	0.577869	0.000334997	LOC_Os01g47760;LOC_Os01g72460;LOC_Os06g14670;LOC_Os01g02790;LOC_Os01g09830;LOC_Os07g04040;LOC_Os03g55850;LOC_Os01g02780;LOC_Os01g02570;LOC_Os07g03870;LOC_Os08g43120;LOC_Os01g02560;LOC_Os01g02580;LOC_Os07g18230;LOC_Os06g11330;LOC_Os08g06280;LOC_Os12g07640;LOC_Os01g55940;LOC_Os02g49986;LOC_Os02g36890;LOC_Os01g02400;LOC_Os07g40290;LOC_Os01g02370;LOC_Os07g37210;LOC_Os09g23620;LOC_Os03g28330;LOC_Os02g…
GO:0009933	meristem structural organization	Biological Process	32	0.650848	0.000377303	LOC_Os06g49100;LOC_Os02g17730;LOC_Os03g43670;LOC_Os03g09170;LOC_Os03g14370;LOC_Os01g70310;LOC_Os04g53860;LOC_Os11g42450;LOC_Os03g11600;LOC_Os01g55260;LOC_Os06g44310;LOC_Os07g31500;LOC_Os07g06620;LOC_Os05g50750;LOC_Os01g72700;LOC_Os12g43660;LOC_Os06g50900;LOC_Os11g32100;LOC_Os12g07030;LOC_Os12g40920;LOC_Os09g31522;LOC_Os04g43200;LOC_Os07g41060;LOC_Os09g08720;LOC_Os04g32110;LOC_Os08g16050;LOC_Os08g…
GO:0009615	response to virus	Biological Process	16	0.660999	0.000383188	LOC_Os04g59370;LOC_Os01g60340;LOC_Os03g16920;LOC_Os03g14050;LOC_Os04g08280;LOC_Os03g06170;LOC_Os03g11910;LOC_Os02g50330;LOC_Os03g13200;LOC_Os09g36580;LOC_Os10g05600;LOC_Os05g38530;LOC_Os03g02260;LOC_Os07g04730;LOC_Os04g45810;LOC_Os11g37950
GO:0045491	xylan metabolic process	Biological Process	25	0.699537	0.000405528	LOC_Os07g09050;LOC_Os04g38780;LOC_Os11g43980;LOC_Os02g43290;LOC_Os07g43560;LOC_Os01g63180;LOC_Os05g41990;LOC_Os11g29780;LOC_Os06g45580;LOC_Os07g01110;LOC_Os03g58980;LOC_Os10g17960;LOC_Os07g48370;LOC_Os03g18110;LOC_Os05g25350;LOC_Os11g03160;LOC_Os08g34550;LOC_Os05g28830;LOC_Os04g30040;LOC_Os07g35004;LOC_Os07g35750;LOC_Os07g35140;LOC_Os02g28074;LOC_Os08g24790;LOC_Os12g02910
GO:0051716	cellular response to stimulus	Biological Process	45	0.701185	0.000406484	LOC_Os03g55350;LOC_Os12g10660;LOC_Os01g04710;LOC_Os08g16660;LOC_Os01g41550;LOC_Os08g41290;LOC_Os11g07670;LOC_Os01g46250;LOC_Os06g40818;LOC_Os12g38120;LOC_Os02g18410;LOC_Os10g25450;LOC_Os02g32860;LOC_Os03g05560;LOC_Os05g45140;LOC_Os07g34720;LOC_Os07g48390;LOC_Os05g39850;LOC_Os02g54830;LOC_Os04g04060;LOC_Os04g46830;LOC_Os12g38170;LOC_Os06g02780;LOC_Os07g37230;LOC_Os02g44320;LOC_Os11g08200;LOC_Os05g…
GO:0010154	fruit development	Biological Process	19	0.701684	0.000406774	LOC_Os03g02610;LOC_Os01g63540;LOC_Os04g47250;LOC_Os01g63930;LOC_Os02g44654;LOC_Os03g47730;LOC_Os03g01800;LOC_Os02g46910;LOC_Os06g07941;LOC_Os09g35940;LOC_Os03g13570;LOC_Os10g40740;LOC_Os01g06640;LOC_Os03g18030;LOC_Os10g02770;LOC_Os02g41800;LOC_Os04g52440;LOC_Os06g01934;LOC_Os10g38110
GO:0045487	gibberellin catabolic process	Biological Process	6	0.7203	0.000417565	LOC_Os01g22910;LOC_Os01g55240;LOC_Os01g11150;LOC_Os07g48330;LOC_Os05g43880;LOC_Os03g21400
GO:0010054	trichoblast differentiation	Biological Process	27	0.734707	0.000425917	LOC_Os12g43340;LOC_Os03g55420;LOC_Os11g38860;LOC_Os04g59150;LOC_Os05g12580;LOC_Os02g58720;LOC_Os01g45700;LOC_Os01g42200;LOC_Os07g47400;LOC_Os03g26490;LOC_Os01g22230;LOC_Os03g02920;LOC_Os01g35330;LOC_Os02g40260;LOC_Os07g25810;LOC_Os04g56180;LOC_Os07g32680;LOC_Os12g28770;LOC_Os01g67360;LOC_Os03g60580;LOC_Os10g41430;LOC_Os09g32964;LOC_Os08g06010;LOC_Os07g02440;LOC_Os06g07220;LOC_Os06g48030;LOC_Os02g…
GO:0007568	aging	Biological Process	16	0.822123	0.000476593	LOC_Os03g21960;LOC_Os09g07440;LOC_Os01g49720;LOC_Os12g24020;LOC_Os06g07941;LOC_Os10g38710;LOC_Os01g52160;LOC_Os02g43820;LOC_Os01g41200;LOC_Os06g44310;LOC_Os10g38780;LOC_Os10g38470;LOC_Os03g18030;LOC_Os08g33710;LOC_Os04g17100;LOC_Os06g48160
GO:0009814	defense response, incompatible interaction	Biological Process	27	0.843568	0.000489025	LOC_Os11g36160;LOC_Os11g07170;LOC_Os07g02780;LOC_Os02g50340;LOC_Os02g35490;LOC_Os08g06280;LOC_Os10g31910;LOC_Os06g04200;LOC_Os06g45710;LOC_Os11g02570;LOC_Os02g17710;LOC_Os12g41180;LOC_Os04g52250;LOC_Os05g46750;LOC_Os09g21120;LOC_Os12g02500;LOC_Os08g42690;LOC_Os08g32060;LOC_Os03g53910;LOC_Os03g62314;LOC_Os08g14940;LOC_Os07g34720;LOC_Os10g25030;LOC_Os01g50400;LOC_Os04g05050;LOC_Os07g26630;LOC_Os01g…
GO:0019722	calcium-mediated signaling	Biological Process	24	0.845534	0.000490165	LOC_Os04g01740;LOC_Os01g11350;LOC_Os05g44030;LOC_Os01g21420;LOC_Os01g53640;LOC_Os11g26880;LOC_Os02g52780;LOC_Os02g44940;LOC_Os01g25560;LOC_Os09g25100;LOC_Os03g03510;LOC_Os09g28500;LOC_Os09g25090;LOC_Os12g41090;LOC_Os06g39960;LOC_Os01g25540;LOC_Os01g44110;LOC_Os03g20650;LOC_Os03g43440;LOC_Os09g23300;LOC_Os01g10890;LOC_Os01g51420;LOC_Os01g64730;LOC_Os12g41110
GO:0019752	carboxylic acid metabolic process	Biological Process	21	0.919485	0.000533035	LOC_Os06g01966;LOC_Os01g05840;LOC_Os05g45100;LOC_Os12g36100;LOC_Os05g45090;LOC_Os05g45110;LOC_Os10g39740;LOC_Os03g45194;LOC_Os01g43270;LOC_Os11g05690;LOC_Os08g42690;LOC_Os09g25770;LOC_Os01g53330;LOC_Os09g25810;LOC_Os11g38870;LOC_Os08g16050;LOC_Os08g34720;LOC_Os01g50400;LOC_Os03g04220;LOC_Os04g14690;LOC_Os01g50370
GO:0009827	plant-type cell wall modification	Biological Process	45	0.97384	0.000564545	LOC_Os05g44070;LOC_Os01g54030;LOC_Os02g42660;LOC_Os01g11810;LOC_Os04g28280;LOC_Os04g55850;LOC_Os12g06660;LOC_Os05g44030;LOC_Os04g33740;LOC_Os11g05320;LOC_Os05g49300;LOC_Os03g60300;LOC_Os03g62314;LOC_Os05g35360;LOC_Os01g42090;LOC_Os02g35660;LOC_Os09g25090;LOC_Os01g44110;LOC_Os03g18120;LOC_Os01g46350;LOC_Os03g43720;LOC_Os12g01560;LOC_Os03g03810;LOC_Os05g25540;LOC_Os01g10890;LOC_Os04g52320;LOC_Os03g…
GO:0050896	response to stimulus	Biological Process	105	1	0.000586751	LOC_Os02g46620;LOC_Os12g04080;LOC_Os03g59460;LOC_Os11g31060;LOC_Os12g43110;LOC_Os01g42900;LOC_Os03g15460;LOC_Os03g06570;LOC_Os06g36810;LOC_Os01g40550;LOC_Os01g03130;LOC_Os01g71170;LOC_Os11g12530;LOC_Os07g04930;LOC_Os05g12040;LOC_Os01g60110;LOC_Os11g19240;LOC_Os07g10910;LOC_Os05g46350;LOC_Os01g44090;LOC_Os07g46510;LOC_Os01g05840;LOC_Os04g51660;LOC_Os03g30830;LOC_Os11g35930;LOC_Os06g08830;LOC_Os02g…
GO:0048580	regulation of post-embryonic development	Biological Process	19	1	0.000587028	LOC_Os04g40440;LOC_Os07g28890;LOC_Os11g01620;LOC_Os12g10660;LOC_Os07g02780;LOC_Os01g72700;LOC_Os12g01700;LOC_Os12g43660;LOC_Os02g14490;LOC_Os05g25260;LOC_Os05g33690;LOC_Os06g49100;LOC_Os03g21730;LOC_Os08g32060;LOC_Os12g41180;LOC_Os06g28480;LOC_Os02g52780;LOC_Os07g05190;LOC_Os11g42450
GO:0010582	floral meristem determinacy	Biological Process	11	1	0.000590027	LOC_Os10g06630;LOC_Os06g04850;LOC_Os06g11330;LOC_Os12g39220;LOC_Os06g04870;LOC_Os03g11600;LOC_Os09g27320;LOC_Os11g48000;LOC_Os02g53530;LOC_Os07g40300;LOC_Os12g04410
GO:0000041	transition metal ion transport	Biological Process	30	1	0.000593345	LOC_Os01g43750;LOC_Os07g35140;LOC_Os02g44654;LOC_Os09g16950;LOC_Os11g42220;LOC_Os04g30030;LOC_Os07g04040;LOC_Os02g58720;LOC_Os11g05470;LOC_Os03g06520;LOC_Os02g43290;LOC_Os12g24020;LOC_Os11g10460;LOC_Os01g36240;LOC_Os02g51680;LOC_Os01g43740;LOC_Os06g30370;LOC_Os04g47250;LOC_Os10g17960;LOC_Os07g35750;LOC_Os07g35004;LOC_Os04g30040;LOC_Os01g63540;LOC_Os01g70310;LOC_Os08g02120;LOC_Os12g41690;LOC_Os10g…
GO:0010304	PSII associated light-harvesting complex II catabolic process	Biological Process	13	1	0.00060401	LOC_Os10g38360;LOC_Os01g49710;LOC_Os10g38710;LOC_Os09g36200;LOC_Os06g12370;LOC_Os01g49720;LOC_Os03g45194;LOC_Os05g44340;LOC_Os02g32520;LOC_Os10g38730;LOC_Os10g25030;LOC_Os10g38470;LOC_Os10g38780
GO:0000162	tryptophan biosynthetic process	Biological Process	14	1	0.000615119	LOC_Os05g04820;LOC_Os02g36890;LOC_Os01g36460;LOC_Os12g07640;LOC_Os01g65370;LOC_Os07g37210;LOC_Os08g05520;LOC_Os03g58320;LOC_Os12g03150;LOC_Os11g03440;LOC_Os03g25550;LOC_Os01g51260;LOC_Os12g33070;LOC_Os08g33660
GO:0010037	response to carbon dioxide	Biological Process	9	1	0.000639525	LOC_Os03g28330;LOC_Os01g45274;LOC_Os08g36680;LOC_Os04g24430;LOC_Os03g22120;LOC_Os01g43460;LOC_Os07g08350;LOC_Os04g51610;LOC_Os01g28840
GO:0045489	pectin biosynthetic process	Biological Process	9	1	0.000639525	LOC_Os11g01570;LOC_Os08g34020;LOC_Os03g18110;LOC_Os12g01560;LOC_Os01g46350;LOC_Os03g18120;LOC_Os01g11810;LOC_Os05g28830;LOC_Os03g60300
GO:0048262	determination of dorsal/ventral asymmetry	Biological Process	9	1	0.000639525	LOC_Os05g51160;LOC_Os05g37060;LOC_Os05g50340;LOC_Os01g44390;LOC_Os01g09640;LOC_Os05g10690;LOC_Os05g49240;LOC_Os01g64360;LOC_Os05g50350
GO:0010480	microsporocyte differentiation	Biological Process	8	1	0.000656584	LOC_Os02g06140;LOC_Os10g32810;LOC_Os03g04770;LOC_Os10g41550;LOC_Os07g35880;LOC_Os03g56270;LOC_Os11g12530;LOC_Os07g04190
GO:0016036	cellular response to phosphate starvation	Biological Process	39	1	0.000673882	LOC_Os01g06640;LOC_Os03g14420;LOC_Os10g38470;LOC_Os01g20860;LOC_Os03g03510;LOC_Os09g25100;LOC_Os12g41090;LOC_Os01g47400;LOC_Os03g15050;LOC_Os12g06060;LOC_Os01g11160;LOC_Os09g25070;LOC_Os07g06470;LOC_Os04g10690;LOC_Os02g43560;LOC_Os08g33710;LOC_Os08g39730;LOC_Os12g38770;LOC_Os02g31030;LOC_Os10g38780;LOC_Os04g43710;LOC_Os01g13280;LOC_Os11g05410;LOC_Os03g48970;LOC_Os03g13540;LOC_Os01g49720;LOC_Os07g…
GO:0009410	response to xenobiotic stimulus	Biological Process	17	1	0.000681857	LOC_Os03g20650;LOC_Os02g33560;LOC_Os11g32100;LOC_Os09g39410;LOC_Os01g09830;LOC_Os05g48340;LOC_Os06g39960;LOC_Os06g04850;LOC_Os01g55150;LOC_Os01g64730;LOC_Os09g24810;LOC_Os08g43600;LOC_Os04g28570;LOC_Os02g52780;LOC_Os01g70310;LOC_Os01g47760;LOC_Os06g50900
GO:0010444	guard mother cell differentiation	Biological Process	4	1	0.000695431	LOC_Os11g32100;LOC_Os06g50900;LOC_Os10g39750;LOC_Os01g70310
GO:0009628	response to abiotic stimulus	Biological Process	99	1	0.000725269	LOC_Os02g17940;LOC_Os05g33900;LOC_Os04g52260;LOC_Os06g50950;LOC_Os02g43640;LOC_Os11g13670;LOC_Os07g46870;LOC_Os01g39330;LOC_Os12g29160;LOC_Os12g12934;LOC_Os11g02540;LOC_Os03g63580;LOC_Os03g18030;LOC_Os04g49360;LOC_Os10g32990;LOC_Os08g10310;LOC_Os06g49100;LOC_Os01g53880;LOC_Os05g27780;LOC_Os01g46400;LOC_Os01g63540;LOC_Os12g43660;LOC_Os01g72700;LOC_Os03g21710;LOC_Os03g45450;LOC_Os03g21960;LOC_Os02g…
GO:0006073	cellular glucan metabolic process	Biological Process	15	1	0.000755563	LOC_Os08g13920;LOC_Os06g48180;LOC_Os01g51400;LOC_Os03g13570;LOC_Os01g16310;LOC_Os12g01700;LOC_Os01g72700;LOC_Os01g04230;LOC_Os04g53950;LOC_Os02g46910;LOC_Os11g01620;LOC_Os03g01800;LOC_Os04g51460;LOC_Os01g11160;LOC_Os10g02770
GO:0046148	pigment biosynthetic process	Biological Process	18	1	0.000763313	LOC_Os10g39140;LOC_Os01g58100;LOC_Os07g32630;LOC_Os02g56860;LOC_Os01g53330;LOC_Os07g31960;LOC_Os01g53420;LOC_Os09g34214;LOC_Os01g61610;LOC_Os02g44654;LOC_Os05g45100;LOC_Os10g33370;LOC_Os04g47250;LOC_Os04g46990;LOC_Os01g39330;LOC_Os05g45110;LOC_Os01g63540;LOC_Os05g45090
GO:0010255	glucose mediated signaling pathway	Biological Process	7	1	0.000763825	LOC_Os08g43600;LOC_Os01g64730;LOC_Os01g09460;LOC_Os12g40920;LOC_Os02g52780;LOC_Os03g20650;LOC_Os01g46970
GO:0005985	sucrose metabolic process	Biological Process	9	1	0.000766952	LOC_Os03g22120;LOC_Os02g01590;LOC_Os02g34600;LOC_Os04g52440;LOC_Os10g41490;LOC_Os04g24430;LOC_Os09g38870;LOC_Os03g28330;LOC_Os02g58480
GO:0055129	L-proline biosynthetic process	Biological Process	3	1	0.000782046	LOC_Os05g38150;LOC_Os01g62900;LOC_Os03g44150
GO:1902247	geranylgeranyl diphosphate catabolic process	Biological Process	3	1	0.000782046	LOC_Os02g36210;LOC_Os02g17780;LOC_Os04g09900
GO:1902243	copal-8-ol diphosphate(3-) biosynthetic process	Biological Process	3	1	0.000782046	LOC_Os04g09900;LOC_Os02g36210;LOC_Os02g17780
GO:0032973	amino acid export	Biological Process	8	1	0.000807553	LOC_Os04g59120;LOC_Os03g05530;LOC_Os06g01966;LOC_Os05g33900;LOC_Os07g34070;LOC_Os01g36580;LOC_Os02g52930;LOC_Os06g01972
GO:0042335	cuticle development	Biological Process	25	1	0.000827151	LOC_Os01g53640;LOC_Os06g14810;LOC_Os05g44030;LOC_Os04g48070;LOC_Os05g37600;LOC_Os03g62314;LOC_Os02g56860;LOC_Os10g33250;LOC_Os07g42420;LOC_Os02g56920;LOC_Os10g25550;LOC_Os05g33080;LOC_Os03g24930;LOC_Os06g05550;LOC_Os01g44110;LOC_Os10g33370;LOC_Os05g44200;LOC_Os01g08260;LOC_Os01g34560;LOC_Os01g52770;LOC_Os05g36050;LOC_Os06g29180;LOC_Os01g42410;LOC_Os05g25540;LOC_Os01g63580
GO:0033554	cellular response to stress	Biological Process	57	1	0.000871929	LOC_Os11g26790;LOC_Os07g35004;LOC_Os10g05490;LOC_Os05g48810;LOC_Os06g09340;LOC_Os09g25060;LOC_Os07g40300;LOC_Os04g41350;LOC_Os01g43590;LOC_Os07g04730;LOC_Os08g02990;LOC_Os08g35160;LOC_Os01g43270;LOC_Os09g21120;LOC_Os11g10710;LOC_Os11g26780;LOC_Os03g57080;LOC_Os02g58720;LOC_Os05g03920;LOC_Os02g43290;LOC_Os07g44950;LOC_Os09g16950;LOC_Os07g05190;LOC_Os09g36580;LOC_Os10g17960;LOC_Os07g35750;LOC_Os09g…
GO:0034638	phosphatidylcholine catabolic process	Biological Process	5	1	0.000904823	LOC_Os03g02740;LOC_Os08g31060;LOC_Os06g40170;LOC_Os06g40180;LOC_Os03g27370
GO:0046466	membrane lipid catabolic process	Biological Process	5	1	0.000904823	LOC_Os06g40170;LOC_Os06g40180;LOC_Os03g27370;LOC_Os03g02740;LOC_Os08g31060
GO:0048765	root hair cell differentiation	Biological Process	41	1	0.000906049	LOC_Os04g44500;LOC_Os04g48070;LOC_Os06g46799;LOC_Os02g44320;LOC_Os06g48180;LOC_Os04g46830;LOC_Os08g02070;LOC_Os01g10320;LOC_Os12g29400;LOC_Os05g41990;LOC_Os10g40420;LOC_Os12g34524;LOC_Os04g42950;LOC_Os02g18410;LOC_Os06g48160;LOC_Os07g48870;LOC_Os01g26300;LOC_Os11g10460;LOC_Os06g43860;LOC_Os04g51460;LOC_Os05g44030;LOC_Os11g45740;LOC_Os01g08470;LOC_Os04g39610;LOC_Os09g28720;LOC_Os03g50960;LOC_Os03g…
GO:0010214	seed coat development	Biological Process	11	1	0.000911275	LOC_Os01g19220;LOC_Os01g58280;LOC_Os04g58710;LOC_Os03g62090;LOC_Os02g51620;LOC_Os04g54810;LOC_Os02g53840;LOC_Os11g18730;LOC_Os01g64750;LOC_Os11g19210;LOC_Os07g14850
GO:0080144	amino acid homeostasis	Biological Process	9	1	0.000914305	LOC_Os02g52930;LOC_Os06g01972;LOC_Os04g38600;LOC_Os07g34070;LOC_Os01g36580;LOC_Os04g59120;LOC_Os05g33900;LOC_Os06g01966;LOC_Os03g05530
GO:0019748	secondary metabolic process	Biological Process	22	1	0.000967526	LOC_Os07g42420;LOC_Os07g32630;LOC_Os06g01934;LOC_Os02g10120;LOC_Os02g56860;LOC_Os08g39840;LOC_Os02g15750;LOC_Os01g41240;LOC_Os09g34214;LOC_Os08g39850;LOC_Os05g50750;LOC_Os07g07410;LOC_Os05g45100;LOC_Os03g47730;LOC_Os02g41954;LOC_Os04g39980;LOC_Os10g33370;LOC_Os01g55240;LOC_Os03g52070;LOC_Os05g45110;LOC_Os04g46990;LOC_Os06g02900
GO:0009639	response to red or far red light	Biological Process	24	1	0.00100551	LOC_Os05g34854;LOC_Os07g33620;LOC_Os08g39830;LOC_Os10g33370;LOC_Os01g42960;LOC_Os01g55150;LOC_Os07g48630;LOC_Os12g24800;LOC_Os07g28890;LOC_Os03g47730;LOC_Os02g51750;LOC_Os07g33440;LOC_Os01g11150;LOC_Os01g22910;LOC_Os05g11990;LOC_Os03g63970;LOC_Os07g44950;LOC_Os01g68720;LOC_Os11g05320;LOC_Os02g56860;LOC_Os03g53910;LOC_Os12g16220;LOC_Os06g24180;LOC_Os09g39910
GO:0019827	stem cell maintenance	Biological Process	6	1	0.00104769	LOC_Os04g36070;LOC_Os02g35180;LOC_Os11g04720;LOC_Os04g57720;LOC_Os12g04500;LOC_Os01g72330
GO:1901348	positive regulation of secondary cell wall biogenesis	Biological Process	6	1	0.00104769	LOC_Os08g05520;LOC_Os12g33070;LOC_Os01g51260;LOC_Os05g04820;LOC_Os01g36460;LOC_Os03g25550
GO:0042127	regulation of cell proliferation	Biological Process	21	1	0.00108779	LOC_Os11g48000;LOC_Os07g37810;LOC_Os04g48416;LOC_Os02g10520;LOC_Os09g29360;LOC_Os09g26920;LOC_Os11g42800;LOC_Os02g15810;LOC_Os02g53200;LOC_Os07g40300;LOC_Os03g08550;LOC_Os03g55350;LOC_Os01g44090;LOC_Os03g02750;LOC_Os02g09740;LOC_Os07g36630;LOC_Os02g53840;LOC_Os12g36890;LOC_Os10g25450;LOC_Os07g01180;LOC_Os04g03050
GO:0010025	wax biosynthetic process	Biological Process	15	1	0.00114162	LOC_Os04g28570;LOC_Os02g56920;LOC_Os02g56860;LOC_Os10g33250;LOC_Os08g16260;LOC_Os02g50330;LOC_Os01g34560;LOC_Os05g04170;LOC_Os09g29670;LOC_Os03g04680;LOC_Os09g39410;LOC_Os10g33370;LOC_Os11g35400;LOC_Os06g44300;LOC_Os06g14810
GO:0015708	silicate transport	Biological Process	4	1	0.00119334	LOC_Os02g51110;LOC_Os06g12310;LOC_Os02g13870;LOC_Os10g36924
GO:0071446	cellular response to salicylic acid stimulus	Biological Process	4	1	0.00119334	LOC_Os02g30910;LOC_Os12g29220;LOC_Os08g42350;LOC_Os12g26290
GO:0051973	positive regulation of telomerase activity	Biological Process	4	1	0.00119334	LOC_Os07g01180;LOC_Os04g40630;LOC_Os01g66890;LOC_Os11g48000
GO:0009888	tissue development	Biological Process	40	1	0.00119949	LOC_Os08g38270;LOC_Os09g02250;LOC_Os06g12280;LOC_Os04g49950;LOC_Os01g06310;LOC_Os02g17680;LOC_Os02g52930;LOC_Os11g43760;LOC_Os10g05750;LOC_Os03g22790;LOC_Os02g56490;LOC_Os08g28710;LOC_Os03g14130;LOC_Os05g28830;LOC_Os04g38810;LOC_Os04g34170;LOC_Os07g34070;LOC_Os06g38970;LOC_Os03g18110;LOC_Os02g28074;LOC_Os05g30820;LOC_Os09g18230;LOC_Os05g33900;LOC_Os05g13900;LOC_Os03g60300;LOC_Os06g43170;LOC_Os05g…
GO:0065008	regulation of biological quality	Biological Process	39	1	0.00120337	LOC_Os04g38780;LOC_Os08g16050;LOC_Os02g06090;LOC_Os07g05190;LOC_Os06g35200;LOC_Os01g07300;LOC_Os12g36100;LOC_Os01g66740;LOC_Os09g27060;LOC_Os03g02610;LOC_Os02g20560;LOC_Os12g42760;LOC_Os07g05740;LOC_Os12g40900;LOC_Os05g43870;LOC_Os03g12790;LOC_Os02g57110;LOC_Os02g46910;LOC_Os03g58350;LOC_Os06g44310;LOC_Os11g42450;LOC_Os03g41390;LOC_Os02g20540;LOC_Os02g17730;LOC_Os06g49100;LOC_Os05g38500;LOC_Os10g…
GO:0009744	response to sucrose	Biological Process	48	1	0.00128824	LOC_Os03g12530;LOC_Os12g03040;LOC_Os04g02050;LOC_Os11g03300;LOC_Os02g54254;LOC_Os03g60080;LOC_Os09g23350;LOC_Os04g48270;LOC_Os12g32640;LOC_Os08g43120;LOC_Os03g28300;LOC_Os03g10620;LOC_Os03g20090;LOC_Os05g31280;LOC_Os12g08260;LOC_Os06g45710;LOC_Os01g01430;LOC_Os01g03914;LOC_Os02g50240;LOC_Os10g32900;LOC_Os08g01140;LOC_Os06g14810;LOC_Os01g66490;LOC_Os08g02120;LOC_Os08g34580;LOC_Os06g07600;LOC_Os11g…
GO:0009411	response to UV	Biological Process	20	1	0.00131708	LOC_Os05g44600;LOC_Os10g39140;LOC_Os09g26980;LOC_Os06g39780;LOC_Os04g57630;LOC_Os03g14420;LOC_Os08g39730;LOC_Os10g05490;LOC_Os07g06470;LOC_Os07g33440;LOC_Os09g26960;LOC_Os09g35940;LOC_Os04g38810;LOC_Os09g08990;LOC_Os01g46250;LOC_Os07g29960;LOC_Os08g42840;LOC_Os07g33620;LOC_Os03g45619;LOC_Os02g36110
GO:0046165	alcohol biosynthetic process	Biological Process	11	1	0.00136513	LOC_Os08g38270;LOC_Os09g25700;LOC_Os09g25690;LOC_Os07g02200;LOC_Os04g46130;LOC_Os10g33370;LOC_Os11g01620;LOC_Os02g56860;LOC_Os05g35360;LOC_Os12g01700;LOC_Os01g04230
GO:0010030	positive regulation of seed germination	Biological Process	13	1	0.00138114	LOC_Os01g46760;LOC_Os07g04190;LOC_Os01g62760;LOC_Os04g58710;LOC_Os11g05470;LOC_Os03g16170;LOC_Os06g30370;LOC_Os12g41060;LOC_Os11g12530;LOC_Os05g49730;LOC_Os05g38290;LOC_Os09g15670;LOC_Os03g56270
GO:0009699	phenylpropanoid biosynthetic process	Biological Process	15	1	0.00138984	LOC_Os11g07960;LOC_Os02g17940;LOC_Os06g49660;LOC_Os03g18030;LOC_Os05g19910;LOC_Os06g39230;LOC_Os06g46680;LOC_Os12g09770;LOC_Os11g29720;LOC_Os09g35940;LOC_Os10g37110;LOC_Os10g11980;LOC_Os09g37200;LOC_Os01g40870;LOC_Os10g35950
GO:0009816	defense response to bacterium, incompatible interaction	Biological Process	25	1	0.00139963	LOC_Os02g10120;LOC_Os03g20550;LOC_Os08g42690;LOC_Os03g27370;LOC_Os06g40180;LOC_Os01g53640;LOC_Os03g18960;LOC_Os03g05310;LOC_Os08g39840;LOC_Os05g44030;LOC_Os04g01740;LOC_Os03g08550;LOC_Os03g44150;LOC_Os06g40170;LOC_Os05g25540;LOC_Os08g39850;LOC_Os02g09740;LOC_Os11g44430;LOC_Os05g33080;LOC_Os07g40290;LOC_Os10g25550;LOC_Os01g44110;LOC_Os01g55940;LOC_Os03g24930;LOC_Os03g02740
GO:0006814	sodium ion transport	Biological Process	8	1	0.00143361	LOC_Os09g31130;LOC_Os12g42910;LOC_Os09g25090;LOC_Os01g20160;LOC_Os04g51820;LOC_Os02g21009;LOC_Os08g39370;LOC_Os07g47100
GO:0009808	lignin metabolic process	Biological Process	10	1	0.00146166	LOC_Os11g29780;LOC_Os05g41990;LOC_Os09g32964;LOC_Os11g10460;LOC_Os11g43980;LOC_Os01g22230;LOC_Os03g02920;LOC_Os10g39170;LOC_Os12g34524;LOC_Os06g20150
GO:0009749	response to glucose	Biological Process	22	1	0.00148726	LOC_Os03g55290;LOC_Os03g17230;LOC_Os12g07030;LOC_Os07g42510;LOC_Os05g31280;LOC_Os03g03510;LOC_Os08g02120;LOC_Os08g31580;LOC_Os05g49700;LOC_Os06g22060;LOC_Os08g43120;LOC_Os11g44810;LOC_Os02g15750;LOC_Os03g55850;LOC_Os07g41360;LOC_Os01g08260;LOC_Os08g01140;LOC_Os01g42410;LOC_Os06g40150;LOC_Os02g50240;LOC_Os02g10760;LOC_Os06g45710
GO:0010039	response to iron ion	Biological Process	12	1	0.00157184	LOC_Os07g46990;LOC_Os01g16650;LOC_Os07g15370;LOC_Os04g45900;LOC_Os10g39750;LOC_Os02g02450;LOC_Os02g02460;LOC_Os02g02830;LOC_Os12g01530;LOC_Os11g01530;LOC_Os01g70310;LOC_Os04g44320
GO:0010311	lateral root formation	Biological Process	18	1	0.0016456	LOC_Os08g39850;LOC_Os05g50750;LOC_Os05g30820;LOC_Os03g40100;LOC_Os01g12660;LOC_Os11g35400;LOC_Os08g28710;LOC_Os03g14370;LOC_Os02g10120;LOC_Os05g04170;LOC_Os11g06820;LOC_Os06g22870;LOC_Os03g43670;LOC_Os04g32110;LOC_Os08g39840;LOC_Os01g63770;LOC_Os05g37470;LOC_Os01g55260
GO:0002376	immune system process	Biological Process	15	1	0.00168179	LOC_Os03g35600;LOC_Os06g46799;LOC_Os02g58720;LOC_Os02g43290;LOC_Os06g20150;LOC_Os04g48930;LOC_Os10g39970;LOC_Os01g22230;LOC_Os07g05110;LOC_Os05g42210;LOC_Os12g34524;LOC_Os02g44670;LOC_Os10g39170;LOC_Os01g16450;LOC_Os02g13520
GO:0009625	response to insect	Biological Process	23	1	0.0017123	LOC_Os09g23620;LOC_Os01g02790;LOC_Os06g14670;LOC_Os03g20550;LOC_Os05g50550;LOC_Os10g25130;LOC_Os09g32470;LOC_Os03g52650;LOC_Os01g02780;LOC_Os03g55850;LOC_Os07g04040;LOC_Os01g02570;LOC_Os07g03870;LOC_Os01g02600;LOC_Os05g10330;LOC_Os01g02560;LOC_Os01g02580;LOC_Os07g18230;LOC_Os01g02400;LOC_Os02g49986;LOC_Os01g02370;LOC_Os07g18240;LOC_Os04g42950
GO:0010223	secondary shoot formation	Biological Process	22	1	0.00182632	LOC_Os03g10620;LOC_Os01g20780;LOC_Os02g51890;LOC_Os01g66490;LOC_Os09g31522;LOC_Os03g21030;LOC_Os08g02210;LOC_Os09g08720;LOC_Os07g41060;LOC_Os01g41240;LOC_Os04g53860;LOC_Os07g04190;LOC_Os10g42130;LOC_Os06g04090;LOC_Os03g56270;LOC_Os02g40900;LOC_Os02g12890;LOC_Os08g01330;LOC_Os10g32900;LOC_Os01g65550;LOC_Os08g10080;LOC_Os03g17760
GO:0052541	plant-type cell wall cellulose metabolic process	Biological Process	17	1	0.00182783	LOC_Os07g01070;LOC_Os08g34380;LOC_Os10g40600;LOC_Os01g08260;LOC_Os05g36050;LOC_Os01g42410;LOC_Os08g07890;LOC_Os12g37840;LOC_Os04g39610;LOC_Os01g08020;LOC_Os08g43120;LOC_Os05g44030;LOC_Os06g45990;LOC_Os03g62314;LOC_Os03g43670;LOC_Os04g31710;LOC_Os07g37850
GO:0009413	response to flooding	Biological Process	3	1	0.00186906	LOC_Os03g28330;LOC_Os03g22120;LOC_Os03g44150
GO:0009823	cytokinin catabolic process	Biological Process	4	1	0.00189625	LOC_Os08g35860;LOC_Os05g31040;LOC_Os10g34230;LOC_Os01g10110
GO:0009704	de-etiolation	Biological Process	12	1	0.00197477	LOC_Os10g38470;LOC_Os10g38780;LOC_Os02g49680;LOC_Os10g38730;LOC_Os01g41240;LOC_Os01g49720;LOC_Os03g10620;LOC_Os03g13540;LOC_Os01g49710;LOC_Os10g38710;LOC_Os10g38360;LOC_Os10g06630
GO:0019761	glucosinolate biosynthetic process	Biological Process	35	1	0.00203026	LOC_Os04g02050;LOC_Os11g42510;LOC_Os02g47790;LOC_Os07g14850;LOC_Os03g18600;LOC_Os01g26210;LOC_Os06g23684;LOC_Os05g50550;LOC_Os05g33900;LOC_Os03g06520;LOC_Os10g30290;LOC_Os08g37940;LOC_Os04g48416;LOC_Os06g24180;LOC_Os07g01070;LOC_Os02g52930;LOC_Os03g04240;LOC_Os03g62090;LOC_Os06g45710;LOC_Os10g40600;LOC_Os03g03790;LOC_Os04g08350;LOC_Os02g49480;LOC_Os06g12370;LOC_Os01g26300;LOC_Os03g04130;LOC_Os01g…
GO:0080001	mucilage extrusion from seed coat	Biological Process	8	1	0.0020304	LOC_Os03g55350;LOC_Os01g64860;LOC_Os09g26920;LOC_Os02g10520;LOC_Os04g03050;LOC_Os04g48416;LOC_Os03g02750;LOC_Os10g25450
GO:0048359	mucilage metabolic process involved in seed coat development	Biological Process	8	1	0.0020304	LOC_Os09g26920;LOC_Os01g64860;LOC_Os03g55350;LOC_Os04g48416;LOC_Os03g02750;LOC_Os02g10520;LOC_Os04g03050;LOC_Os10g25450
GO:0009696	salicylic acid metabolic process	Biological Process	9	1	0.00203303	LOC_Os12g02500;LOC_Os06g20040;LOC_Os01g04710;LOC_Os01g57770;LOC_Os09g25570;LOC_Os06g40818;LOC_Os08g16660;LOC_Os01g41550;LOC_Os09g34214
GO:0046483	heterocycle metabolic process	Biological Process	21	1	0.0020788	LOC_Os03g27120;LOC_Os07g02200;LOC_Os07g30610;LOC_Os10g25130;LOC_Os05g05170;LOC_Os07g05190;LOC_Os01g58640;LOC_Os08g37940;LOC_Os06g20040;LOC_Os03g04250;LOC_Os09g30414;LOC_Os05g45110;LOC_Os07g30620;LOC_Os05g45090;LOC_Os06g19530;LOC_Os04g46990;LOC_Os07g46480;LOC_Os09g25570;LOC_Os05g45100;LOC_Os09g35600;LOC_Os01g11860
GO:0045229	external encapsulating structure organization	Biological Process	13	1	0.00211412	LOC_Os03g45619;LOC_Os07g33620;LOC_Os06g49660;LOC_Os07g29960;LOC_Os04g40440;LOC_Os11g35450;LOC_Os03g57780;LOC_Os07g33440;LOC_Os02g06090;LOC_Os06g28480;LOC_Os02g51860;LOC_Os10g35950;LOC_Os06g35200
GO:0009863	salicylic acid mediated signaling pathway	Biological Process	35	1	0.00222923	LOC_Os11g13670;LOC_Os03g24930;LOC_Os03g02920;LOC_Os09g17630;LOC_Os10g40360;LOC_Os08g31200;LOC_Os03g01300;LOC_Os03g43720;LOC_Os11g02840;LOC_Os11g03300;LOC_Os07g14850;LOC_Os08g43600;LOC_Os02g51900;LOC_Os04g55159;LOC_Os04g25440;LOC_Os03g50960;LOC_Os01g47760;LOC_Os01g52260;LOC_Os02g57560;LOC_Os12g40920;LOC_Os10g25550;LOC_Os04g30040;LOC_Os03g20650;LOC_Os11g10460;LOC_Os06g07220;LOC_Os04g44850;LOC_Os05g…
GO:0042545	cell wall modification	Biological Process	27	1	0.00229783	LOC_Os09g27890;LOC_Os06g48180;LOC_Os02g54190;LOC_Os01g53640;LOC_Os04g39610;LOC_Os05g44600;LOC_Os12g41690;LOC_Os01g65790;LOC_Os03g24930;LOC_Os05g33690;LOC_Os08g13920;LOC_Os01g60330;LOC_Os05g33080;LOC_Os06g48160;LOC_Os02g17710;LOC_Os05g50490;LOC_Os03g17760;LOC_Os06g16300;LOC_Os03g54910;LOC_Os11g07170;LOC_Os06g09340;LOC_Os01g44090;LOC_Os02g53000;LOC_Os01g21034;LOC_Os01g15039;LOC_Os04g51460;LOC_Os01g…
GO:0051179	localization	Biological Process	19	1	0.002322	LOC_Os12g35350;LOC_Os08g44840;LOC_Os06g20040;LOC_Os09g21120;LOC_Os01g41240;LOC_Os08g01950;LOC_Os09g25570;LOC_Os01g72510;LOC_Os01g08130;LOC_Os08g02030;LOC_Os01g04710;LOC_Os07g34850;LOC_Os07g46480;LOC_Os09g34214;LOC_Os08g16660;LOC_Os05g08530;LOC_Os07g06570;LOC_Os11g07960;LOC_Os09g30414
GO:0045338	farnesyl diphosphate metabolic process	Biological Process	5	1	0.00241099	LOC_Os03g24760;LOC_Os03g22620;LOC_Os08g07080;LOC_Os08g07100;LOC_Os04g27670
GO:0030001	metal ion transport	Biological Process	17	1	0.00252692	LOC_Os08g42690;LOC_Os01g32330;LOC_Os10g38870;LOC_Os04g39300;LOC_Os07g47100;LOC_Os04g17100;LOC_Os04g32030;LOC_Os04g49980;LOC_Os01g52160;LOC_Os06g15370;LOC_Os03g60850;LOC_Os01g20830;LOC_Os01g48710;LOC_Os12g23280;LOC_Os04g51830;LOC_Os01g41200;LOC_Os01g41720
GO:0015996	chlorophyll catabolic process	Biological Process	17	1	0.00252692	LOC_Os07g01070;LOC_Os01g73980;LOC_Os09g36200;LOC_Os10g02100;LOC_Os03g04130;LOC_Os06g49220;LOC_Os09g26880;LOC_Os03g03790;LOC_Os02g48450;LOC_Os10g25030;LOC_Os03g05310;LOC_Os03g04570;LOC_Os03g19240;LOC_Os03g45194;LOC_Os05g01810;LOC_Os06g24730;LOC_Os04g57440
GO:0040007	growth	Biological Process	24	1	0.00262602	LOC_Os01g53880;LOC_Os03g24930;LOC_Os06g36810;LOC_Os06g20310;LOC_Os06g50950;LOC_Os10g25550;LOC_Os05g48900;LOC_Os12g39400;LOC_Os08g39850;LOC_Os10g02040;LOC_Os02g34600;LOC_Os07g49140;LOC_Os10g41490;LOC_Os08g39840;LOC_Os07g48330;LOC_Os01g57450;LOC_Os09g02250;LOC_Os08g16050;LOC_Os02g50690;LOC_Os09g39910;LOC_Os02g13660;LOC_Os02g10120;LOC_Os08g42690;LOC_Os06g11660
GO:0006896	Golgi to vacuole transport	Biological Process	7	1	0.0026953	LOC_Os05g33900;LOC_Os03g05530;LOC_Os01g36580;LOC_Os07g48229;LOC_Os07g34070;LOC_Os02g52930;LOC_Os06g01972
GO:0010497	plasmodesmata-mediated intercellular transport	Biological Process	7	1	0.0026953	LOC_Os05g10830;LOC_Os01g50900;LOC_Os03g58980;LOC_Os05g19670;LOC_Os01g72290;LOC_Os03g44880;LOC_Os01g07376
GO:0016197	endosomal transport	Biological Process	9	1	0.0027087	LOC_Os12g29400;LOC_Os01g16650;LOC_Os03g03980;LOC_Os03g52650;LOC_Os03g53400;LOC_Os01g55260;LOC_Os01g12660;LOC_Os04g44500;LOC_Os02g02830
GO:0009062	fatty acid catabolic process	Biological Process	20	1	0.0027135	LOC_Os03g63970;LOC_Os03g44810;LOC_Os03g18600;LOC_Os01g45460;LOC_Os06g46920;LOC_Os03g17760;LOC_Os02g35660;LOC_Os11g05740;LOC_Os04g46560;LOC_Os05g34854;LOC_Os01g65550;LOC_Os02g51890;LOC_Os09g31522;LOC_Os03g07180;LOC_Os07g13634;LOC_Os06g44310;LOC_Os09g08720;LOC_Os11g42800;LOC_Os04g53860;LOC_Os04g28280
GO:0044249	cellular biosynthetic process	Biological Process	83	1	0.00273042	LOC_Os01g46250;LOC_Os04g46560;LOC_Os10g17960;LOC_Os03g55350;LOC_Os01g11160;LOC_Os06g29180;LOC_Os08g02030;LOC_Os11g07170;LOC_Os08g01950;LOC_Os01g58280;LOC_Os08g32060;LOC_Os02g43660;LOC_Os06g02900;LOC_Os04g03050;LOC_Os02g41954;LOC_Os11g01620;LOC_Os01g58194;LOC_Os01g23970;LOC_Os06g36050;LOC_Os07g42520;LOC_Os11g36000;LOC_Os08g02230;LOC_Os10g39740;LOC_Os03g04250;LOC_Os10g25450;LOC_Os04g51040;LOC_Os09g…
GO:0090355	positive regulation of auxin metabolic process	Biological Process	6	1	0.00279192	LOC_Os05g33900;LOC_Os03g05530;LOC_Os06g01972;LOC_Os01g36580;LOC_Os02g52930;LOC_Os07g34070
GO:0090358	positive regulation of tryptophan metabolic process	Biological Process	6	1	0.00279192	LOC_Os01g36580;LOC_Os02g52930;LOC_Os07g34070;LOC_Os06g01972;LOC_Os05g33900;LOC_Os03g05530
GO:0019216	regulation of lipid metabolic process	Biological Process	10	1	0.00283505	LOC_Os03g47730;LOC_Os02g10120;LOC_Os01g34560;LOC_Os06g01934;LOC_Os08g39850;LOC_Os02g15750;LOC_Os02g49680;LOC_Os08g39840;LOC_Os07g42420;LOC_Os06g14810
GO:0042761	very long-chain fatty acid biosynthetic process	Biological Process	10	1	0.00283505	LOC_Os03g04680;LOC_Os04g47250;LOC_Os01g63930;LOC_Os06g19550;LOC_Os02g44654;LOC_Os10g38110;LOC_Os01g63540;LOC_Os11g03440;LOC_Os12g03150;LOC_Os06g19530
GO:0009682	induced systemic resistance	Biological Process	17	1	0.00295246	LOC_Os12g07640;LOC_Os04g42950;LOC_Os02g49986;LOC_Os02g36890;LOC_Os12g33070;LOC_Os08g33660;LOC_Os08g05520;LOC_Os11g03440;LOC_Os12g03150;LOC_Os01g36460;LOC_Os01g65370;LOC_Os05g04820;LOC_Os06g14670;LOC_Os09g36580;LOC_Os07g37210;LOC_Os09g23620;LOC_Os03g25550
GO:0030243	cellulose metabolic process	Biological Process	12	1	0.0030347	LOC_Os07g41310;LOC_Os07g02810;LOC_Os04g19740;LOC_Os06g01490;LOC_Os07g32660;LOC_Os06g14810;LOC_Os07g41320;LOC_Os01g34560;LOC_Os10g36390;LOC_Os06g46500;LOC_Os11g37260;LOC_Os07g42420
GO:0042546	cell wall biogenesis	Biological Process	18	1	0.00303931	LOC_Os07g36630;LOC_Os03g20120;LOC_Os05g25350;LOC_Os05g51670;LOC_Os05g28830;LOC_Os01g67360;LOC_Os03g01800;LOC_Os06g12460;LOC_Os03g13570;LOC_Os01g10320;LOC_Os11g38860;LOC_Os07g09050;LOC_Os04g38780;LOC_Os02g51060;LOC_Os08g24750;LOC_Os10g02770;LOC_Os02g36140;LOC_Os11g29780
GO:0048440	carpel development	Biological Process	17	1	0.00318655	LOC_Os09g23350;LOC_Os04g54930;LOC_Os07g06620;LOC_Os02g46680;LOC_Os08g34580;LOC_Os02g50040;LOC_Os02g53530;LOC_Os02g54820;LOC_Os11g48000;LOC_Os02g50330;LOC_Os10g40740;LOC_Os03g11600;LOC_Os07g49390;LOC_Os01g06640;LOC_Os03g21030;LOC_Os07g40300;LOC_Os05g04600
GO:0019344	cysteine biosynthetic process	Biological Process	35	1	0.00320239	LOC_Os07g02100;LOC_Os01g25484;LOC_Os03g01820;LOC_Os04g44850;LOC_Os08g01140;LOC_Os08g06550;LOC_Os02g49480;LOC_Os06g45710;LOC_Os07g02120;LOC_Os02g47420;LOC_Os02g49680;LOC_Os09g19710;LOC_Os04g57440;LOC_Os08g02120;LOC_Os10g06630;LOC_Os05g34170;LOC_Os03g50970;LOC_Os10g25130;LOC_Os01g06640;LOC_Os03g09940;LOC_Os02g15750;LOC_Os02g48450;LOC_Os07g05365;LOC_Os04g52390;LOC_Os03g40100;LOC_Os02g51750;LOC_Os03g…
GO:0010228	vegetative to reproductive phase transition of meristem	Biological Process	59	1	0.00322244	LOC_Os04g53860;LOC_Os08g02070;LOC_Os04g48070;LOC_Os03g14370;LOC_Os01g70310;LOC_Os01g65550;LOC_Os01g70730;LOC_Os01g34560;LOC_Os06g50900;LOC_Os01g16650;LOC_Os11g42800;LOC_Os11g42220;LOC_Os02g51890;LOC_Os04g43200;LOC_Os01g26210;LOC_Os07g14850;LOC_Os03g40100;LOC_Os12g35610;LOC_Os06g14370;LOC_Os10g42030;LOC_Os01g58850;LOC_Os04g54930;LOC_Os12g15530;LOC_Os10g35580;LOC_Os01g10320;LOC_Os03g05310;LOC_Os06g…
GO:0045730	respiratory burst	Biological Process	7	1	0.00322386	LOC_Os02g58720;LOC_Os01g22230;LOC_Os06g46799;LOC_Os01g16450;LOC_Os12g34524;LOC_Os06g20150;LOC_Os10g39170
GO:0034059	response to anoxia	Biological Process	7	1	0.00322386	LOC_Os07g42510;LOC_Os12g07030;LOC_Os06g40150;LOC_Os08g36920;LOC_Os02g10760;LOC_Os03g08460;LOC_Os12g41060
GO:0009641	shade avoidance	Biological Process	8	1	0.00327331	LOC_Os09g27450;LOC_Os04g45690;LOC_Os10g32900;LOC_Os06g04870;LOC_Os06g04850;LOC_Os12g10660;LOC_Os01g07500;LOC_Os03g12860
GO:1901701	cellular response to oxygen-containing compound	Biological Process	69	1	0.00335774	LOC_Os12g34524;LOC_Os02g06150;LOC_Os02g17730;LOC_Os10g39170;LOC_Os08g32060;LOC_Os04g22120;LOC_Os02g41710;LOC_Os10g05600;LOC_Os09g37050;LOC_Os06g46799;LOC_Os10g39750;LOC_Os01g55150;LOC_Os01g66510;LOC_Os11g04350;LOC_Os11g07170;LOC_Os02g54640;LOC_Os01g63540;LOC_Os02g53530;LOC_Os03g53910;LOC_Os01g16450;LOC_Os12g41180;LOC_Os09g29360;LOC_Os04g43710;LOC_Os04g52260;LOC_Os08g03020;LOC_Os05g25430;LOC_Os11g…
GO:0042631	cellular response to water deprivation	Biological Process	28	1	0.00339828	LOC_Os01g56560;LOC_Os09g32670;LOC_Os03g43440;LOC_Os01g11340;LOC_Os10g38710;LOC_Os04g33060;LOC_Os01g52770;LOC_Os05g44200;LOC_Os09g25090;LOC_Os01g49720;LOC_Os05g04700;LOC_Os03g17790;LOC_Os10g38780;LOC_Os03g55850;LOC_Os02g43560;LOC_Os07g37510;LOC_Os08g39730;LOC_Os09g34214;LOC_Os01g64110;LOC_Os12g41090;LOC_Os05g03130;LOC_Os05g49170;LOC_Os03g03510;LOC_Os09g25100;LOC_Os10g38470;LOC_Os10g37340;LOC_Os01g…
GO:0043900	regulation of multi-organism process	Biological Process	32	1	0.00342715	LOC_Os01g02580;LOC_Os01g02560;LOC_Os12g07640;LOC_Os02g49986;LOC_Os01g02400;LOC_Os02g36890;LOC_Os01g72460;LOC_Os06g14670;LOC_Os03g53910;LOC_Os01g02790;LOC_Os01g02570;LOC_Os01g02780;LOC_Os03g55850;LOC_Os03g28300;LOC_Os08g43120;LOC_Os12g33070;LOC_Os03g21710;LOC_Os04g59370;LOC_Os01g42410;LOC_Os01g02600;LOC_Os08g05520;LOC_Os01g08260;LOC_Os05g25770;LOC_Os07g37210;LOC_Os09g23620;LOC_Os03g58320;LOC_Os03g…
GO:0051453	regulation of intracellular pH	Biological Process	6	1	0.00345072	LOC_Os03g05530;LOC_Os05g33900;LOC_Os07g34070;LOC_Os02g52930;LOC_Os01g36580;LOC_Os06g01972
GO:0052576	carbohydrate storage	Biological Process	2	1	0.0034731	LOC_Os07g48830;LOC_Os03g20120
GO:0080021	response to benzoic acid	Biological Process	2	1	0.0034731	LOC_Os07g47590;LOC_Os03g44810
GO:0071465	cellular response to desiccation	Biological Process	2	1	0.0034731	LOC_Os03g20120;LOC_Os07g48830
GO:0015773	raffinose transport	Biological Process	2	1	0.0034731	LOC_Os03g20120;LOC_Os07g48830
GO:1901697	olivetolic acid biosynthetic process	Biological Process	2	1	0.0034731	LOC_Os01g33160;LOC_Os11g05290
GO:0048825	cotyledon development	Biological Process	23	1	0.00360788	LOC_Os03g14370;LOC_Os04g43200;LOC_Os08g31580;LOC_Os12g07030;LOC_Os03g09170;LOC_Os03g43670;LOC_Os11g05320;LOC_Os04g32110;LOC_Os04g48070;LOC_Os01g12490;LOC_Os01g10320;LOC_Os01g07500;LOC_Os06g14370;LOC_Os07g48630;LOC_Os03g40100;LOC_Os06g40150;LOC_Os02g10760;LOC_Os08g36920;LOC_Os05g45240;LOC_Os08g39830;LOC_Os04g47300;LOC_Os05g25260;LOC_Os08g40170
GO:0009266	response to temperature stimulus	Biological Process	26	1	0.00367677	LOC_Os07g41310;LOC_Os01g73980;LOC_Os05g25350;LOC_Os04g02050;LOC_Os01g44130;LOC_Os03g62090;LOC_Os12g23280;LOC_Os04g08350;LOC_Os12g10660;LOC_Os02g34600;LOC_Os07g14850;LOC_Os06g11330;LOC_Os09g35630;LOC_Os04g19740;LOC_Os11g05290;LOC_Os12g06270;LOC_Os02g48450;LOC_Os02g44870;LOC_Os09g37910;LOC_Os04g53950;LOC_Os01g33160;LOC_Os04g57440;LOC_Os03g60560;LOC_Os07g41320;LOC_Os05g01810;LOC_Os01g72460
GO:0035304	regulation of protein dephosphorylation	Biological Process	33	1	0.00373084	LOC_Os03g52650;LOC_Os05g40960;LOC_Os03g08930;LOC_Os02g15750;LOC_Os02g50330;LOC_Os04g08280;LOC_Os03g20550;LOC_Os07g18240;LOC_Os05g25770;LOC_Os02g42380;LOC_Os06g39712;LOC_Os01g02600;LOC_Os03g21710;LOC_Os11g07460;LOC_Os04g59370;LOC_Os06g12370;LOC_Os04g38600;LOC_Os07g03870;LOC_Os04g38410;LOC_Os01g02570;LOC_Os07g04040;LOC_Os01g09830;LOC_Os01g02780;LOC_Os01g02790;LOC_Os01g47760;LOC_Os01g02370;LOC_Os07g…
GO:0052542	defense response by callose deposition	Biological Process	18	1	0.00376793	LOC_Os02g10120;LOC_Os12g37690;LOC_Os03g20090;LOC_Os12g39120;LOC_Os11g45740;LOC_Os08g35210;LOC_Os08g39840;LOC_Os01g45090;LOC_Os12g37970;LOC_Os12g35610;LOC_Os11g36160;LOC_Os11g07170;LOC_Os07g48870;LOC_Os08g39850;LOC_Os04g49490;LOC_Os05g25770;LOC_Os02g06140;LOC_Os03g55320
GO:0034976	response to endoplasmic reticulum stress	Biological Process	39	1	0.00386219	LOC_Os03g61670;LOC_Os05g38530;LOC_Os04g52310;LOC_Os03g53340;LOC_Os01g42190;LOC_Os07g35630;LOC_Os07g35730;LOC_Os03g58320;LOC_Os08g41340;LOC_Os11g07680;LOC_Os04g08280;LOC_Os01g04360;LOC_Os05g04170;LOC_Os03g20550;LOC_Os10g06630;LOC_Os06g45710;LOC_Os02g42620;LOC_Os05g25770;LOC_Os03g21710;LOC_Os05g44340;LOC_Os09g25070;LOC_Os01g38229;LOC_Os04g59370;LOC_Os04g40410;LOC_Os10g41480;LOC_Os03g02260;LOC_Os04g…
GO:0022900	electron transport chain	Biological Process	37	1	0.00401599	LOC_Os06g39780;LOC_Os02g43660;LOC_Os03g05310;LOC_Os04g51160;LOC_Os01g27140;LOC_Os08g36500;LOC_Os01g07376;LOC_Os10g05490;LOC_Os10g34230;LOC_Os01g57880;LOC_Os07g02100;LOC_Os01g25484;LOC_Os07g48510;LOC_Os04g46130;LOC_Os07g02120;LOC_Os02g06140;LOC_Os02g53130;LOC_Os06g24180;LOC_Os08g36480;LOC_Os04g44830;LOC_Os01g10110;LOC_Os10g38110;LOC_Os02g10120;LOC_Os08g39840;LOC_Os05g31040;LOC_Os01g09830;LOC_Os08g…
GO:0048507	meristem development	Biological Process	34	1	0.00403278	LOC_Os04g38780;LOC_Os05g31040;LOC_Os07g07990;LOC_Os04g52780;LOC_Os04g57630;LOC_Os07g07040;LOC_Os03g22040;LOC_Os02g06090;LOC_Os08g35860;LOC_Os07g05190;LOC_Os01g10110;LOC_Os11g36000;LOC_Os03g21730;LOC_Os04g42620;LOC_Os07g06570;LOC_Os02g17710;LOC_Os12g10870;LOC_Os08g34580;LOC_Os03g20450;LOC_Os09g23350;LOC_Os10g32990;LOC_Os03g58790;LOC_Os08g02070;LOC_Os01g51400;LOC_Os08g14940;LOC_Os02g06150;LOC_Os02g…
GO:0052546	cell wall pectin metabolic process	Biological Process	18	1	0.00404073	LOC_Os07g37850;LOC_Os04g31710;LOC_Os03g43670;LOC_Os03g62314;LOC_Os06g45990;LOC_Os05g44030;LOC_Os08g43120;LOC_Os11g38860;LOC_Os01g08020;LOC_Os04g39610;LOC_Os12g37840;LOC_Os08g07890;LOC_Os05g36050;LOC_Os01g42410;LOC_Os01g08260;LOC_Os10g40600;LOC_Os07g01070;LOC_Os08g34380
GO:0080110	sporopollenin biosynthetic process	Biological Process	10	1	0.00405966	LOC_Os09g26960;LOC_Os09g31522;LOC_Os02g44654;LOC_Os10g38110;LOC_Os04g47250;LOC_Os09g08720;LOC_Os01g63540;LOC_Os07g41060;LOC_Os09g08990;LOC_Os04g53860
GO:0043091	L-arginine import	Biological Process	4	1	0.0040643	LOC_Os12g06060;LOC_Os11g05690;LOC_Os01g12520;LOC_Os01g11160
GO:0051259	protein oligomerization	Biological Process	5	1	0.00410545	LOC_Os01g04370;LOC_Os01g04380;LOC_Os01g04360;LOC_Os03g45340;LOC_Os04g36750
GO:0080171	lytic vacuole organization	Biological Process	6	1	0.0042184	LOC_Os01g36580;LOC_Os02g52930;LOC_Os07g34070;LOC_Os06g01972;LOC_Os05g33900;LOC_Os03g05530
GO:0010182	sugar mediated signaling pathway	Biological Process	25	1	0.00447883	LOC_Os11g32100;LOC_Os08g39830;LOC_Os06g39960;LOC_Os04g10000;LOC_Os08g36920;LOC_Os03g40100;LOC_Os06g40150;LOC_Os07g48630;LOC_Os06g50900;LOC_Os04g40630;LOC_Os06g14370;LOC_Os01g10320;LOC_Os09g38310;LOC_Os04g10010;LOC_Os04g32110;LOC_Os02g54820;LOC_Os03g43670;LOC_Os03g09170;LOC_Os01g66890;LOC_Os06g39650;LOC_Os12g07030;LOC_Os04g43200;LOC_Os01g70310;LOC_Os03g14370;LOC_Os02g44940
GO:0006561	proline biosynthetic process	Biological Process	7	1	0.00451411	LOC_Os04g10010;LOC_Os03g61740;LOC_Os01g66490;LOC_Os04g10000;LOC_Os07g46930;LOC_Os07g46940;LOC_Os01g12520
GO:0019953	sexual reproduction	Biological Process	10	1	0.00454957	LOC_Os07g31390;LOC_Os06g11660;LOC_Os10g30290;LOC_Os06g14370;LOC_Os02g01140;LOC_Os10g40730;LOC_Os02g42650;LOC_Os04g43200;LOC_Os10g40720;LOC_Os02g44108
GO:0003333	amino acid transmembrane transport	Biological Process	9	1	0.00458514	LOC_Os11g19240;LOC_Os04g47420;LOC_Os12g06060;LOC_Os11g05690;LOC_Os03g19290;LOC_Os01g63770;LOC_Os11g06820;LOC_Os01g11160;LOC_Os05g37470
GO:0009693	ethylene biosynthetic process	Biological Process	23	1	0.00480371	LOC_Os01g06640;LOC_Os06g44310;LOC_Os08g39840;LOC_Os03g05310;LOC_Os01g09830;LOC_Os08g16050;LOC_Os02g17940;LOC_Os02g10120;LOC_Os12g07030;LOC_Os06g48300;LOC_Os05g05680;LOC_Os01g47760;LOC_Os02g51890;LOC_Os01g65550;LOC_Os04g37710;LOC_Os03g17760;LOC_Os03g08460;LOC_Os05g02390;LOC_Os05g05670;LOC_Os08g38460;LOC_Os08g39850;LOC_Os03g43720;LOC_Os02g49480
GO:2000241	regulation of reproductive process	Biological Process	8	1	0.00503826	LOC_Os01g72700;LOC_Os12g43660;LOC_Os08g42840;LOC_Os05g46040;LOC_Os11g42450;LOC_Os02g14490;LOC_Os06g49100;LOC_Os01g40094
GO:0015804	neutral amino acid transport	Biological Process	6	1	0.00510514	LOC_Os02g01210;LOC_Os12g09300;LOC_Os07g04180;LOC_Os04g41350;LOC_Os12g08090;LOC_Os03g60260
GO:0006944	membrane fusion	Biological Process	51	1	0.0051604	LOC_Os07g03870;LOC_Os07g04040;LOC_Os03g55850;LOC_Os01g16650;LOC_Os02g43560;LOC_Os02g41780;LOC_Os05g44070;LOC_Os06g24180;LOC_Os04g51610;LOC_Os09g17630;LOC_Os03g03980;LOC_Os01g12660;LOC_Os06g11330;LOC_Os03g52650;LOC_Os03g18960;LOC_Os08g02070;LOC_Os08g38400;LOC_Os03g53400;LOC_Os04g08280;LOC_Os06g48300;LOC_Os02g47420;LOC_Os04g49490;LOC_Os07g18240;LOC_Os03g56820;LOC_Os03g54000;LOC_Os04g59370;LOC_Os01g…
GO:0005986	sucrose biosynthetic process	Biological Process	9	1	0.00518326	LOC_Os06g07600;LOC_Os09g25090;LOC_Os03g22120;LOC_Os04g33740;LOC_Os01g10890;LOC_Os07g10840;LOC_Os04g24430;LOC_Os03g28330;LOC_Os02g58480
GO:0044238	primary metabolic process	Biological Process	172	1	0.00524696	LOC_Os09g27250;LOC_Os05g48900;LOC_Os03g42520;LOC_Os06g40818;LOC_Os03g09220;LOC_Os02g46620;LOC_Os06g28480;LOC_Os08g35160;LOC_Os03g29190;LOC_Os07g37230;LOC_Os11g06570;LOC_Os03g14258;LOC_Os03g02280;LOC_Os12g07550;LOC_Os12g44020;LOC_Os01g01620;LOC_Os06g46740;LOC_Os12g10870;LOC_Os08g31200;LOC_Os07g08320;LOC_Os09g30414;LOC_Os03g57950;LOC_Os10g07556;LOC_Os12g17570;LOC_Os01g53820;LOC_Os02g50690;LOC_Os11g…
GO:0080147	root hair cell development	Biological Process	11	1	0.0053526	LOC_Os01g09460;LOC_Os04g08350;LOC_Os08g41320;LOC_Os01g71320;LOC_Os02g49480;LOC_Os01g06640;LOC_Os04g28280;LOC_Os02g39140;LOC_Os02g35660;LOC_Os10g40740;LOC_Os03g56950
GO:0000911	cytokinesis by cell plate formation	Biological Process	33	1	0.00552357	LOC_Os01g36390;LOC_Os02g10020;LOC_Os12g41090;LOC_Os12g36890;LOC_Os03g39020;LOC_Os03g03510;LOC_Os03g43670;LOC_Os09g25100;LOC_Os05g39850;LOC_Os03g14370;LOC_Os01g50370;LOC_Os03g52650;LOC_Os10g35580;LOC_Os02g15810;LOC_Os02g53200;LOC_Os03g40100;LOC_Os01g44090;LOC_Os04g54940;LOC_Os12g16210;LOC_Os03g43440;LOC_Os07g36630;LOC_Os01g09580;LOC_Os02g56540;LOC_Os09g25090;LOC_Os01g08150;LOC_Os05g46750;LOC_Os09g…
GO:0006470	protein dephosphorylation	Biological Process	16	1	0.0056177	LOC_Os03g16170;LOC_Os03g55320;LOC_Os11g01790;LOC_Os04g49490;LOC_Os01g40094;LOC_Os01g62760;LOC_Os12g01770;LOC_Os01g19130;LOC_Os05g49730;LOC_Os09g15670;LOC_Os05g38290;LOC_Os01g46760;LOC_Os12g39120;LOC_Os05g46040;LOC_Os01g58640;LOC_Os06g48300
GO:0010026	trichome differentiation	Biological Process	9	1	0.00584004	LOC_Os04g44500;LOC_Os01g43230;LOC_Os02g42430;LOC_Os02g53530;LOC_Os07g40300;LOC_Os12g29400;LOC_Os09g27320;LOC_Os04g39610;LOC_Os01g32920
GO:0006081	cellular aldehyde metabolic process	Biological Process	3	1	0.00598109	LOC_Os04g45720;LOC_Os09g26880;LOC_Os02g43280
GO:0010421	hydrogen peroxide-mediated programmed cell death	Biological Process	3	1	0.00598109	LOC_Os01g61610;LOC_Os05g41670;LOC_Os01g70930
GO:0009926	auxin polar transport	Biological Process	23	1	0.00598258	LOC_Os01g63580;LOC_Os07g04190;LOC_Os07g02780;LOC_Os03g03810;LOC_Os01g60330;LOC_Os02g12890;LOC_Os03g56270;LOC_Os07g41310;LOC_Os12g40890;LOC_Os10g31910;LOC_Os06g05550;LOC_Os07g41320;LOC_Os06g22870;LOC_Os01g42294;LOC_Os11g06820;LOC_Os05g37600;LOC_Os09g39910;LOC_Os05g46750;LOC_Os04g05050;LOC_Os05g37470;LOC_Os01g63770;LOC_Os01g50400;LOC_Os02g55890
GO:0031525	menthol biosynthetic process	Biological Process	7	1	0.0061597	LOC_Os04g10000;LOC_Os07g46870;LOC_Os03g61740;LOC_Os04g10010;LOC_Os07g46940;LOC_Os07g46930;LOC_Os04g45000
GO:0006811	ion transport	Biological Process	32	1	0.00637318	LOC_Os04g57630;LOC_Os05g04380;LOC_Os05g03920;LOC_Os09g18230;LOC_Os04g39150;LOC_Os03g20870;LOC_Os07g34980;LOC_Os09g27320;LOC_Os01g55240;LOC_Os07g15370;LOC_Os07g05740;LOC_Os09g25980;LOC_Os09g17630;LOC_Os02g17710;LOC_Os01g23970;LOC_Os04g59190;LOC_Os01g36790;LOC_Os01g53330;LOC_Os03g27120;LOC_Os04g45900;LOC_Os07g31840;LOC_Os01g43270;LOC_Os07g02140;LOC_Os05g33690;LOC_Os07g02120;LOC_Os05g45110;LOC_Os02g…
GO:0001708	cell fate specification	Biological Process	13	1	0.00640245	LOC_Os12g37970;LOC_Os03g20090;LOC_Os03g21730;LOC_Os12g37690;LOC_Os08g42600;LOC_Os03g03570;LOC_Os07g48870;LOC_Os01g72700;LOC_Os12g33070;LOC_Os11g45740;LOC_Os04g57630;LOC_Os04g42950;LOC_Os04g52310
GO:0006865	amino acid transport	Biological Process	42	1	0.00649442	LOC_Os01g15039;LOC_Os01g57854;LOC_Os03g01300;LOC_Os03g43720;LOC_Os07g18230;LOC_Os11g02840;LOC_Os01g02370;LOC_Os01g66740;LOC_Os08g36920;LOC_Os03g24930;LOC_Os04g12499;LOC_Os02g02450;LOC_Os12g07030;LOC_Os01g42294;LOC_Os03g50960;LOC_Os02g43560;LOC_Os04g55159;LOC_Os09g25810;LOC_Os01g61940;LOC_Os07g03870;LOC_Os11g19240;LOC_Os04g33740;LOC_Os01g04230;LOC_Os04g44320;LOC_Os06g07220;LOC_Os03g45450;LOC_Os02g…
GO:0009610	response to symbiotic fungus	Biological Process	11	1	0.00650591	LOC_Os08g37874;LOC_Os02g47790;LOC_Os03g03980;LOC_Os08g36500;LOC_Os01g60330;LOC_Os05g46040;LOC_Os08g36480;LOC_Os02g53130;LOC_Os06g01934;LOC_Os01g40094;LOC_Os01g42294
GO:0009934	regulation of meristem structural organization	Biological Process	11	1	0.00650591	LOC_Os03g56270;LOC_Os08g40170;LOC_Os02g12890;LOC_Os10g32810;LOC_Os02g06140;LOC_Os11g12530;LOC_Os04g01740;LOC_Os07g35880;LOC_Os10g41550;LOC_Os03g04770;LOC_Os07g04190
GO:0048511	rhythmic process	Biological Process	5	1	0.00651266	LOC_Os02g22020;LOC_Os12g35350;LOC_Os06g45710;LOC_Os01g19480;LOC_Os01g74020
GO:0010043	response to zinc ion	Biological Process	30	1	0.00656386	LOC_Os07g03870;LOC_Os01g17214;LOC_Os07g41060;LOC_Os09g08720;LOC_Os09g31522;LOC_Os02g51890;LOC_Os02g02450;LOC_Os07g01180;LOC_Os02g47790;LOC_Os03g17760;LOC_Os12g01530;LOC_Os07g18230;LOC_Os08g38460;LOC_Os06g21250;LOC_Os03g13200;LOC_Os04g45900;LOC_Os04g52310;LOC_Os04g53860;LOC_Os01g20780;LOC_Os11g04060;LOC_Os11g01530;LOC_Os03g04240;LOC_Os03g04250;LOC_Os07g18240;LOC_Os01g65550;LOC_Os04g46560;LOC_Os02g…
GO:0009719	response to endogenous stimulus	Biological Process	26	1	0.00676151	LOC_Os12g41180;LOC_Os09g36580;LOC_Os05g48330;LOC_Os06g03580;LOC_Os03g08790;LOC_Os03g14050;LOC_Os07g34850;LOC_Os07g37400;LOC_Os01g39330;LOC_Os11g26570;LOC_Os08g34550;LOC_Os07g06570;LOC_Os02g54830;LOC_Os07g05110;LOC_Os02g44870;LOC_Os12g34524;LOC_Os09g02250;LOC_Os01g68720;LOC_Os10g05600;LOC_Os06g02780;LOC_Os02g41710;LOC_Os08g16660;LOC_Os07g46480;LOC_Os01g66510;LOC_Os02g58390;LOC_Os11g26790
GO:0009786	regulation of asymmetric cell division	Biological Process	6	1	0.0072766	LOC_Os03g14370;LOC_Os04g32110;LOC_Os03g43670;LOC_Os03g40100;LOC_Os08g28710;LOC_Os05g30820
GO:0051260	protein homooligomerization	Biological Process	6	1	0.0072766	LOC_Os01g04360;LOC_Os01g04380;LOC_Os01g04370;LOC_Os03g16020;LOC_Os03g16030;LOC_Os03g15960
GO:0005983	starch catabolic process	Biological Process	9	1	0.00734424	LOC_Os03g04770;LOC_Os10g32810;LOC_Os02g06140;LOC_Os03g56270;LOC_Os07g35880;LOC_Os10g41550;LOC_Os07g04190;LOC_Os11g12530;LOC_Os07g46790
GO:0009059	macromolecule biosynthetic process	Biological Process	17	1	0.00740068	LOC_Os10g33370;LOC_Os03g20450;LOC_Os12g01700;LOC_Os11g07170;LOC_Os04g40440;LOC_Os02g57110;LOC_Os11g01620;LOC_Os11g35450;LOC_Os03g44150;LOC_Os11g06880;LOC_Os05g33900;LOC_Os07g07990;LOC_Os04g52780;LOC_Os09g39910;LOC_Os07g05190;LOC_Os06g49100;LOC_Os02g56860
GO:0010160	formation of organ boundary	Biological Process	8	1	0.00745188	LOC_Os02g46680;LOC_Os11g48000;LOC_Os10g42130;LOC_Os07g01180;LOC_Os05g04600;LOC_Os01g66490;LOC_Os07g40300;LOC_Os04g54930
GO:0044036	cell wall macromolecule metabolic process	Biological Process	21	1	0.00757763	LOC_Os01g10320;LOC_Os01g11810;LOC_Os06g44310;LOC_Os08g01530;LOC_Os07g02200;LOC_Os05g31040;LOC_Os03g45210;LOC_Os03g39020;LOC_Os01g42294;LOC_Os09g30120;LOC_Os03g02610;LOC_Os03g20120;LOC_Os01g60330;LOC_Os12g36890;LOC_Os02g50040;LOC_Os01g46350;LOC_Os01g32920;LOC_Os11g29420;LOC_Os10g34230;LOC_Os01g04230;LOC_Os12g24020
GO:0042128	nitrate assimilation	Biological Process	5	1	0.00802543	LOC_Os08g36500;LOC_Os02g53130;LOC_Os02g50240;LOC_Os08g36480;LOC_Os01g25484
GO:1900056	negative regulation of leaf senescence	Biological Process	7	1	0.00821505	LOC_Os03g21710;LOC_Os01g66490;LOC_Os11g07460;LOC_Os11g02540;LOC_Os02g42380;LOC_Os03g20550;LOC_Os05g25770
GO:0060560	developmental growth involved in morphogenesis	Biological Process	33	1	0.00831299	LOC_Os01g44069;LOC_Os11g44430;LOC_Os07g25810;LOC_Os11g12530;LOC_Os01g42294;LOC_Os01g45700;LOC_Os09g28500;LOC_Os03g21730;LOC_Os02g06090;LOC_Os05g35360;LOC_Os01g35330;LOC_Os10g38800;LOC_Os04g38810;LOC_Os05g33690;LOC_Os06g43044;LOC_Os02g40260;LOC_Os08g39590;LOC_Os02g58390;LOC_Os04g40440;LOC_Os12g28770;LOC_Os07g32680;LOC_Os06g07220;LOC_Os09g04710;LOC_Os01g48940;LOC_Os11g42450;LOC_Os01g61570;LOC_Os03g…
GO:1901137	carbohydrate derivative biosynthetic process	Biological Process	14	1	0.00839879	LOC_Os06g38980;LOC_Os09g26920;LOC_Os04g29580;LOC_Os01g58280;LOC_Os10g25450;LOC_Os04g03050;LOC_Os08g39240;LOC_Os03g05560;LOC_Os03g55350;LOC_Os04g29680;LOC_Os02g02120;LOC_Os11g35240;LOC_Os04g51040;LOC_Os05g50750
GO:0009970	cellular response to sulfate starvation	Biological Process	8	1	0.00842334	LOC_Os01g55150;LOC_Os01g11160;LOC_Os02g33560;LOC_Os04g02050;LOC_Os03g06520;LOC_Os12g06060;LOC_Os03g09940;LOC_Os10g37340
GO:0048513	organ development	Biological Process	61	1	0.00843206	LOC_Os08g34320;LOC_Os09g28280;LOC_Os06g01966;LOC_Os07g40690;LOC_Os02g45620;LOC_Os05g08530;LOC_Os01g60810;LOC_Os04g59200;LOC_Os06g12740;LOC_Os03g07180;LOC_Os05g35360;LOC_Os07g44850;LOC_Os04g38780;LOC_Os01g13280;LOC_Os05g32230;LOC_Os11g31060;LOC_Os08g39590;LOC_Os10g33370;LOC_Os06g07300;LOC_Os01g44130;LOC_Os07g06860;LOC_Os04g48830;LOC_Os05g48900;LOC_Os07g42700;LOC_Os02g56860;LOC_Os07g02200;LOC_Os01g…
GO:0016045	detection of bacterium	Biological Process	22	1	0.00855743	LOC_Os04g52780;LOC_Os01g36460;LOC_Os01g65370;LOC_Os09g23620;LOC_Os07g37210;LOC_Os06g14670;LOC_Os03g20550;LOC_Os08g14940;LOC_Os03g58320;LOC_Os10g39140;LOC_Os01g72460;LOC_Os02g36890;LOC_Os07g40290;LOC_Os02g49986;LOC_Os05g25770;LOC_Os12g07640;LOC_Os01g55940;LOC_Os08g05520;LOC_Os11g07170;LOC_Os11g36160;LOC_Os12g33070;LOC_Os03g21710
GO:0042991	transcription factor import into nucleus	Biological Process	11	1	0.0085905	LOC_Os03g09170;LOC_Os06g40150;LOC_Os10g20470;LOC_Os02g42940;LOC_Os12g07030;LOC_Os04g28570;LOC_Os08g31580;LOC_Os02g40900;LOC_Os05g25260;LOC_Os02g10760;LOC_Os08g36920
GO:0044699	single-organism process	Biological Process	67	1	0.00896818	LOC_Os03g20760;LOC_Os11g12530;LOC_Os07g04930;LOC_Os08g29200;LOC_Os03g19270;LOC_Os03g49830;LOC_Os01g50090;LOC_Os07g48160;LOC_Os08g40910;LOC_Os10g29570;LOC_Os01g63620;LOC_Os05g43880;LOC_Os03g54930;LOC_Os02g28220;LOC_Os01g16920;LOC_Os03g61740;LOC_Os06g02040;LOC_Os12g36810;LOC_Os06g01760;LOC_Os03g09220;LOC_Os08g23870;LOC_Os05g30750;LOC_Os07g42220;LOC_Os03g63390;LOC_Os05g50910;LOC_Os06g39880;LOC_Os03g…
GO:0007020	microtubule nucleation	Biological Process	19	1	0.00906127	LOC_Os06g16300;LOC_Os02g06140;LOC_Os01g22980;LOC_Os01g60330;LOC_Os08g34380;LOC_Os03g56270;LOC_Os03g23960;LOC_Os07g09670;LOC_Os03g04770;LOC_Os08g07890;LOC_Os05g46350;LOC_Os07g04190;LOC_Os10g32810;LOC_Os06g44310;LOC_Os08g16050;LOC_Os01g42294;LOC_Os10g41550;LOC_Os07g35880;LOC_Os03g50970
GO:0071396	cellular response to lipid	Biological Process	9	1	0.00912751	LOC_Os07g02120;LOC_Os03g03570;LOC_Os08g42840;LOC_Os02g17730;LOC_Os07g02100;LOC_Os01g55150;LOC_Os11g44430;LOC_Os03g21730;LOC_Os04g57630
GO:0010383	cell wall polysaccharide metabolic process	Biological Process	3	1	0.00915248	LOC_Os01g16310;LOC_Os01g70970;LOC_Os01g71170
GO:0030643	cellular phosphate ion homeostasis	Biological Process	3	1	0.00915248	LOC_Os02g31030;LOC_Os03g13540;LOC_Os04g32320
GO:0035445	borate transmembrane transport	Biological Process	3	1	0.00915248	LOC_Os12g37840;LOC_Os01g08020;LOC_Os10g36924
GO:0006955	immune response	Biological Process	11	1	0.00938941	LOC_Os07g31500;LOC_Os04g40440;LOC_Os09g37600;LOC_Os02g53000;LOC_Os12g10870;LOC_Os09g18230;LOC_Os04g52780;LOC_Os10g32990;LOC_Os07g05740;LOC_Os09g25060;LOC_Os09g27890
GO:0048588	developmental cell growth	Biological Process	10	1	0.00940635	LOC_Os04g42620;LOC_Os03g27120;LOC_Os02g18410;LOC_Os10g05750;LOC_Os05g08530;LOC_Os01g08470;LOC_Os05g35360;LOC_Os02g58390;LOC_Os01g42294;LOC_Os02g17730
GO:0010325	raffinose family oligosaccharide biosynthetic process	Biological Process	7	1	0.00941347	LOC_Os07g10840;LOC_Os03g20120;LOC_Os06g07600;LOC_Os09g25090;LOC_Os07g48830;LOC_Os01g10890;LOC_Os11g13670
GO:0048481	ovule development	Biological Process	40	1	0.00944787	LOC_Os02g04640;LOC_Os07g37810;LOC_Os01g20780;LOC_Os11g01530;LOC_Os04g53860;LOC_Os08g02070;LOC_Os03g11600;LOC_Os03g05310;LOC_Os06g14810;LOC_Os01g61570;LOC_Os04g48070;LOC_Os03g08550;LOC_Os01g34560;LOC_Os01g26300;LOC_Os07g48870;LOC_Os06g16300;LOC_Os01g65550;LOC_Os02g40900;LOC_Os04g42950;LOC_Os06g45710;LOC_Os10g30290;LOC_Os03g20090;LOC_Os12g37690;LOC_Os09g31522;LOC_Os02g51890;LOC_Os07g41060;LOC_Os04g…
GO:0043086	negative regulation of catalytic activity	Biological Process	22	1	0.00948774	LOC_Os01g65790;LOC_Os02g10520;LOC_Os04g48416;LOC_Os04g44830;LOC_Os03g38170;LOC_Os02g54190;LOC_Os01g64860;LOC_Os01g07376;LOC_Os09g26920;LOC_Os01g58280;LOC_Os01g57854;LOC_Os03g55350;LOC_Os01g21034;LOC_Os01g15039;LOC_Os02g33380;LOC_Os10g36500;LOC_Os06g09340;LOC_Os03g02750;LOC_Os08g01670;LOC_Os02g53840;LOC_Os10g25450;LOC_Os04g03050
GO:0006633	fatty acid biosynthetic process	Biological Process	19	1	0.0095934	LOC_Os06g44300;LOC_Os11g35400;LOC_Os10g33370;LOC_Os12g43363;LOC_Os03g56820;LOC_Os03g03370;LOC_Os03g01820;LOC_Os01g34560;LOC_Os01g47080;LOC_Os08g16260;LOC_Os06g14810;LOC_Os11g06880;LOC_Os01g54030;LOC_Os02g42660;LOC_Os07g42420;LOC_Os02g56920;LOC_Os05g04170;LOC_Os02g56860;LOC_Os10g33250
GO:0032502	developmental process	Biological Process	30	1	0.00961821	LOC_Os07g04930;LOC_Os07g48330;LOC_Os08g31090;LOC_Os08g40910;LOC_Os10g35030;LOC_Os09g36580;LOC_Os02g50810;LOC_Os07g37620;LOC_Os05g48580;LOC_Os01g16920;LOC_Os01g63620;LOC_Os05g50990;LOC_Os03g14050;LOC_Os01g62060;LOC_Os02g15690;LOC_Os04g45340;LOC_Os07g42220;LOC_Os10g05600;LOC_Os12g42930;LOC_Os12g36810;LOC_Os08g39330;LOC_Os06g01760;LOC_Os02g07930;LOC_Os03g03350;LOC_Os09g25700;LOC_Os04g52110;LOC_Os12g…
GO:0006097	glyoxylate cycle	Biological Process	5	1	0.00976557	LOC_Os04g40990;LOC_Os03g03790;LOC_Os03g04130;LOC_Os03g19240;LOC_Os07g34520
GO:0043392	negative regulation of DNA binding	Biological Process	2	1	0.0100102	LOC_Os09g24810;LOC_Os12g03110
GO:1901696	cannabinoid biosynthetic process	Biological Process	2	1	0.0100102	LOC_Os11g05290;LOC_Os01g33160
GO:0006520	cellular amino acid metabolic process	Biological Process	14	1	0.0104281	LOC_Os02g56860;LOC_Os07g40940;LOC_Os03g47730;LOC_Os06g23684;LOC_Os01g40870;LOC_Os01g44090;LOC_Os03g14370;LOC_Os11g42510;LOC_Os05g50490;LOC_Os08g04560;LOC_Os03g54910;LOC_Os10g33370;LOC_Os03g30830;LOC_Os03g56950
GO:0006636	unsaturated fatty acid biosynthetic process	Biological Process	18	1	0.010483	LOC_Os12g01370;LOC_Os02g49680;LOC_Os06g14370;LOC_Os06g23684;LOC_Os02g49480;LOC_Os08g39850;LOC_Os01g34560;LOC_Os11g01340;LOC_Os07g49310;LOC_Os10g41490;LOC_Os02g34600;LOC_Os06g14810;LOC_Os08g39840;LOC_Os02g15750;LOC_Os01g06640;LOC_Os07g42420;LOC_Os04g43200;LOC_Os02g10120
GO:0080052	response to histidine	Biological Process	8	1	0.0106464	LOC_Os05g34010;LOC_Os07g01070;LOC_Os10g40600;LOC_Os06g49220;LOC_Os06g15370;LOC_Os10g02100;LOC_Os03g60850;LOC_Os03g04570
GO:0043201	response to leucine	Biological Process	8	1	0.0106464	LOC_Os10g02100;LOC_Os03g60850;LOC_Os03g04570;LOC_Os07g01070;LOC_Os05g34010;LOC_Os10g40600;LOC_Os06g15370;LOC_Os06g49220
GO:0080053	response to phenylalanine	Biological Process	8	1	0.0106464	LOC_Os03g04570;LOC_Os03g60850;LOC_Os10g02100;LOC_Os06g49220;LOC_Os06g15370;LOC_Os10g40600;LOC_Os05g34010;LOC_Os07g01070
GO:0002237	response to molecule of bacterial origin	Biological Process	19	1	0.0107328	LOC_Os01g02370;LOC_Os01g02400;LOC_Os07g40290;LOC_Os07g05740;LOC_Os01g55940;LOC_Os12g32850;LOC_Os01g02600;LOC_Os03g03570;LOC_Os12g43660;LOC_Os01g02560;LOC_Os01g02580;LOC_Os01g72700;LOC_Os09g25060;LOC_Os01g02780;LOC_Os03g55850;LOC_Os01g02570;LOC_Os06g48300;LOC_Os01g02790;LOC_Os03g21730
GO:0051782	negative regulation of cell division	Biological Process	9	1	0.01122	LOC_Os10g42130;LOC_Os08g01330;LOC_Os08g10080;LOC_Os09g29360;LOC_Os03g21030;LOC_Os01g66490;LOC_Os03g08930;LOC_Os06g04090;LOC_Os08g42600
GO:0015827	tryptophan transport	Biological Process	5	1	0.0117481	LOC_Os12g08090;LOC_Os04g41350;LOC_Os07g04180;LOC_Os12g09300;LOC_Os02g01210
GO:0010115	regulation of abscisic acid biosynthetic process	Biological Process	5	1	0.0117481	LOC_Os04g10000;LOC_Os03g61740;LOC_Os04g10010;LOC_Os07g46940;LOC_Os07g46930
GO:0015810	aspartate transport	Biological Process	5	1	0.0117481	LOC_Os07g04180;LOC_Os04g41350;LOC_Os12g08090;LOC_Os02g01210;LOC_Os12g09300
GO:0016572	histone phosphorylation	Biological Process	13	1	0.0119167	LOC_Os01g41200;LOC_Os02g15810;LOC_Os04g40940;LOC_Os11g42800;LOC_Os08g40170;LOC_Os10g35580;LOC_Os09g27060;LOC_Os01g50370;LOC_Os05g44600;LOC_Os04g54940;LOC_Os05g46750;LOC_Os01g52160;LOC_Os09g37910
GO:0044272	sulfur compound biosynthetic process	Biological Process	14	1	0.0119811	LOC_Os06g44310;LOC_Os08g39840;LOC_Os06g14810;LOC_Os08g16050;LOC_Os10g37340;LOC_Os05g45240;LOC_Os10g40740;LOC_Os10g40420;LOC_Os07g42420;LOC_Os07g02780;LOC_Os08g39850;LOC_Os02g10120;LOC_Os01g34560;LOC_Os06g01934
GO:0009735	response to cytokinin	Biological Process	23	1	0.0127051	LOC_Os09g24810;LOC_Os03g03510;LOC_Os04g57720;LOC_Os03g14370;LOC_Os10g40420;LOC_Os01g72330;LOC_Os04g36070;LOC_Os12g03110;LOC_Os05g04600;LOC_Os04g32110;LOC_Os07g05460;LOC_Os05g36050;LOC_Os03g40100;LOC_Os02g51860;LOC_Os04g54930;LOC_Os02g35180;LOC_Os02g46680;LOC_Os09g27450;LOC_Os08g01330;LOC_Os02g42380;LOC_Os01g44110;LOC_Os02g53530;LOC_Os03g12860
GO:0000226	microtubule cytoskeleton organization	Biological Process	26	1	0.0127884	LOC_Os11g05320;LOC_Os01g50400;LOC_Os03g07810;LOC_Os01g16650;LOC_Os03g56070;LOC_Os05g46750;LOC_Os09g16950;LOC_Os01g08150;LOC_Os02g56540;LOC_Os05g02820;LOC_Os07g36630;LOC_Os01g09580;LOC_Os01g44090;LOC_Os12g16210;LOC_Os12g01700;LOC_Os11g01620;LOC_Os02g15810;LOC_Os02g53200;LOC_Os05g43820;LOC_Os03g11400;LOC_Os01g50370;LOC_Os03g50970;LOC_Os03g39020;LOC_Os12g36890;LOC_Os07g29330;LOC_Os02g10020
GO:0009901	anther dehiscence	Biological Process	13	1	0.0128063	LOC_Os10g42130;LOC_Os08g42350;LOC_Os02g10120;LOC_Os06g45580;LOC_Os08g39850;LOC_Os01g51260;LOC_Os04g34230;LOC_Os08g01330;LOC_Os12g29220;LOC_Os02g30910;LOC_Os06g04090;LOC_Os01g19170;LOC_Os08g39840
GO:0006457	protein folding	Biological Process	42	1	0.013017	LOC_Os04g01740;LOC_Os06g44160;LOC_Os03g02260;LOC_Os01g38359;LOC_Os04g28420;LOC_Os03g16920;LOC_Os02g52150;LOC_Os03g14180;LOC_Os05g41490;LOC_Os04g53730;LOC_Os02g15930;LOC_Os08g42690;LOC_Os05g48340;LOC_Os03g45340;LOC_Os06g35960;LOC_Os03g15960;LOC_Os09g17630;LOC_Os04g37990;LOC_Os01g58850;LOC_Os01g08860;LOC_Os02g54140;LOC_Os06g46900;LOC_Os01g36790;LOC_Os02g54060;LOC_Os03g61670;LOC_Os05g38530;LOC_Os01g…
GO:2000070	regulation of response to water deprivation	Biological Process	3	1	0.0131321	LOC_Os08g31580;LOC_Os05g49700;LOC_Os03g09170
GO:0006268	DNA unwinding involved in DNA replication	Biological Process	3	1	0.0131321	LOC_Os01g36390;LOC_Os05g39850;LOC_Os05g14590
GO:0052325	cell wall pectin biosynthetic process	Biological Process	3	1	0.0131321	LOC_Os12g02910;LOC_Os11g03160;LOC_Os07g48370
GO:0016131	brassinosteroid metabolic process	Biological Process	11	1	0.0142737	LOC_Os01g43740;LOC_Os07g05460;LOC_Os07g23570;LOC_Os07g48330;LOC_Os01g24780;LOC_Os06g39880;LOC_Os01g45110;LOC_Os05g08480;LOC_Os01g43750;LOC_Os02g11700;LOC_Os01g45140
GO:0019915	lipid storage	Biological Process	17	1	0.0144244	LOC_Os01g70310;LOC_Os04g43200;LOC_Os03g14370;LOC_Os12g40920;LOC_Os03g43670;LOC_Os03g09170;LOC_Os12g07030;LOC_Os04g32110;LOC_Os01g10320;LOC_Os06g50900;LOC_Os06g14370;LOC_Os06g40150;LOC_Os03g40100;LOC_Os08g43600;LOC_Os08g36920;LOC_Os11g32100;LOC_Os01g46250
GO:0009631	cold acclimation	Biological Process	14	1	0.0146408	LOC_Os03g55850;LOC_Os12g07640;LOC_Os05g02390;LOC_Os03g17760;LOC_Os01g64750;LOC_Os04g48930;LOC_Os02g21090;LOC_Os07g42420;LOC_Os02g51890;LOC_Os02g21009;LOC_Os06g03670;LOC_Os06g21250;LOC_Os05g49170;LOC_Os03g05280
GO:0090333	regulation of stomatal closure	Biological Process	9	1	0.0150048	LOC_Os01g02370;LOC_Os07g18240;LOC_Os01g17214;LOC_Os02g49680;LOC_Os07g04040;LOC_Os07g03870;LOC_Os11g04060;LOC_Os07g18230;LOC_Os09g16950
GO:1901928	cadinene biosynthetic process	Biological Process	4	1	0.0154365	LOC_Os08g04500;LOC_Os03g24760;LOC_Os03g22620;LOC_Os04g27670
GO:0060416	response to growth hormone	Biological Process	7	1	0.0155019	LOC_Os10g38360;LOC_Os10g38710;LOC_Os01g49710;LOC_Os10g38780;LOC_Os10g38470;LOC_Os10g38730;LOC_Os01g49720
GO:0002238	response to molecule of fungal origin	Biological Process	7	1	0.0155019	LOC_Os09g37050;LOC_Os05g43910;LOC_Os03g44740;LOC_Os03g62314;LOC_Os01g32780;LOC_Os02g53320;LOC_Os03g19270
GO:0048229	gametophyte development	Biological Process	20	1	0.0156134	LOC_Os10g41550;LOC_Os03g21730;LOC_Os07g35880;LOC_Os03g58110;LOC_Os08g14940;LOC_Os11g12530;LOC_Os11g42450;LOC_Os11g42800;LOC_Os07g07990;LOC_Os10g32810;LOC_Os11g07170;LOC_Os07g04190;LOC_Os01g72700;LOC_Os03g03570;LOC_Os07g31500;LOC_Os03g04770;LOC_Os03g56270;LOC_Os03g20450;LOC_Os07g05740;LOC_Os10g38800
GO:0009909	regulation of flower development	Biological Process	47	1	0.0161705	LOC_Os07g06620;LOC_Os10g32900;LOC_Os11g32100;LOC_Os02g07930;LOC_Os03g43670;LOC_Os03g09170;LOC_Os05g39850;LOC_Os01g10320;LOC_Os09g27890;LOC_Os07g40300;LOC_Os06g40150;LOC_Os01g44090;LOC_Os02g56540;LOC_Os08g36920;LOC_Os12g07030;LOC_Os07g41320;LOC_Os12g39220;LOC_Os04g57630;LOC_Os04g32110;LOC_Os01g52160;LOC_Os01g36390;LOC_Os06g50900;LOC_Os07g41310;LOC_Os01g74020;LOC_Os02g53530;LOC_Os02g04640;LOC_Os03g…
GO:0031537	regulation of anthocyanin metabolic process	Biological Process	8	1	0.0163504	LOC_Os02g35180;LOC_Os01g72330;LOC_Os01g74020;LOC_Os12g04500;LOC_Os11g04720;LOC_Os05g40960;LOC_Os04g57720;LOC_Os04g36070
GO:0080022	primary root development	Biological Process	9	1	0.0164536	LOC_Os06g48160;LOC_Os04g38600;LOC_Os06g48180;LOC_Os01g74020;LOC_Os08g13920;LOC_Os02g34600;LOC_Os10g41490;LOC_Os04g51460;LOC_Os01g07500
GO:0010090	trichome morphogenesis	Biological Process	29	1	0.0164638	LOC_Os05g04820;LOC_Os11g45740;LOC_Os04g39610;LOC_Os01g63770;LOC_Os06g14670;LOC_Os03g20090;LOC_Os12g37690;LOC_Os08g44840;LOC_Os11g06820;LOC_Os03g25550;LOC_Os01g37110;LOC_Os02g50630;LOC_Os02g49986;LOC_Os12g07640;LOC_Os05g50800;LOC_Os12g37970;LOC_Os11g03440;LOC_Os04g54930;LOC_Os05g37470;LOC_Os01g10320;LOC_Os01g36460;LOC_Os01g65370;LOC_Os07g37210;LOC_Os09g23620;LOC_Os02g46680;LOC_Os01g45090;LOC_Os12g…
GO:0006473	protein acetylation	Biological Process	5	1	0.0164958	LOC_Os03g12860;LOC_Os09g27450;LOC_Os01g66890;LOC_Os03g38170;LOC_Os04g48070
GO:0009864	induced systemic resistance, jasmonic acid mediated signaling pathway	Biological Process	11	1	0.0166884	LOC_Os05g25770;LOC_Os05g25260;LOC_Os02g43820;LOC_Os08g36920;LOC_Os12g41060;LOC_Os03g20550;LOC_Os07g42510;LOC_Os12g07030;LOC_Os11g02540;LOC_Os03g21710;LOC_Os12g04410
GO:0055062	phosphate ion homeostasis	Biological Process	6	1	0.0176861	LOC_Os11g05410;LOC_Os08g06010;LOC_Os01g13280;LOC_Os12g39400;LOC_Os12g44020;LOC_Os02g21009
GO:0006793	phosphorus metabolic process	Biological Process	6	1	0.0176861	LOC_Os01g04230;LOC_Os02g56540;LOC_Os01g51400;LOC_Os05g48900;LOC_Os08g39590;LOC_Os02g21009
GO:0048583	regulation of response to stimulus	Biological Process	14	1	0.0177325	LOC_Os07g44950;LOC_Os01g50370;LOC_Os07g06860;LOC_Os01g09580;LOC_Os10g40740;LOC_Os03g56950;LOC_Os01g50400;LOC_Os03g15270;LOC_Os02g34970;LOC_Os07g41590;LOC_Os08g32060;LOC_Os09g21120;LOC_Os01g74550;LOC_Os07g44850
GO:0010035	response to inorganic substance	Biological Process	37	1	0.0177926	LOC_Os09g30414;LOC_Os01g55240;LOC_Os06g46920;LOC_Os06g02900;LOC_Os08g34580;LOC_Os03g51010;LOC_Os05g11990;LOC_Os12g12934;LOC_Os11g02540;LOC_Os09g23350;LOC_Os05g25430;LOC_Os07g40690;LOC_Os01g72510;LOC_Os09g25570;LOC_Os03g12820;LOC_Os07g04040;LOC_Os08g34720;LOC_Os04g43710;LOC_Os02g43290;LOC_Os10g39140;LOC_Os12g17570;LOC_Os01g38359;LOC_Os08g42690;LOC_Os03g53910;LOC_Os09g38670;LOC_Os04g30040;LOC_Os01g…
GO:0031539	positive regulation of anthocyanin metabolic process	Biological Process	3	1	0.0179474	LOC_Os06g39960;LOC_Os03g13540;LOC_Os01g11350
GO:0033506	glucosinolate biosynthetic process from homomethionine	Biological Process	3	1	0.0179474	LOC_Os07g02100;LOC_Os07g02140;LOC_Os07g02120
GO:1902242	copal-8-ol diphosphate(3-) catabolic process	Biological Process	3	1	0.0179474	LOC_Os02g36264;LOC_Os11g28530;LOC_Os02g36140
GO:0019605	butyrate metabolic process	Biological Process	3	1	0.0179474	LOC_Os03g04130;LOC_Os03g19240;LOC_Os03g03790
GO:1902246	cis-abienol biosynthetic process	Biological Process	3	1	0.0179474	LOC_Os11g28530;LOC_Os02g36264;LOC_Os02g36140
GO:0031540	regulation of anthocyanin biosynthetic process	Biological Process	8	1	0.0180664	LOC_Os04g59370;LOC_Os10g05600;LOC_Os03g14050;LOC_Os07g04730;LOC_Os04g08280;LOC_Os03g11600;LOC_Os02g41800;LOC_Os09g36580
GO:0046395	carboxylic acid catabolic process	Biological Process	4	1	0.018939	LOC_Os04g46990;LOC_Os01g11160;LOC_Os11g35400;LOC_Os12g06060
GO:0033306	phytol metabolic process	Biological Process	2	1	0.0192384	LOC_Os01g25990;LOC_Os09g33530
GO:0080165	callose deposition in phloem sieve plate	Biological Process	2	1	0.0192384	LOC_Os04g24430;LOC_Os02g58480
GO:0019253	reductive pentose-phosphate cycle	Biological Process	5	1	0.0192861	LOC_Os04g38600;LOC_Os12g19470;LOC_Os06g45710;LOC_Os04g19740;LOC_Os12g17600
GO:0042178	xenobiotic catabolic process	Biological Process	5	1	0.0192861	LOC_Os05g45100;LOC_Os01g53420;LOC_Os05g45110;LOC_Os01g53330;LOC_Os01g43270
GO:0009642	response to light intensity	Biological Process	5	1	0.0192861	LOC_Os01g62190;LOC_Os12g39400;LOC_Os09g25070;LOC_Os01g64110;LOC_Os03g56950
GO:0015809	arginine transport	Biological Process	5	1	0.0192861	LOC_Os12g09300;LOC_Os02g01210;LOC_Os12g08090;LOC_Os07g04180;LOC_Os04g41350
GO:0010411	xyloglucan metabolic process	Biological Process	7	1	0.0194128	LOC_Os08g13920;LOC_Os06g46340;LOC_Os06g48160;LOC_Os01g46400;LOC_Os06g48180;LOC_Os04g51460;LOC_Os04g53950
GO:0071497	cellular response to freezing	Biological Process	7	1	0.0194128	LOC_Os07g42510;LOC_Os12g07030;LOC_Os02g43820;LOC_Os08g36920;LOC_Os03g08460;LOC_Os06g07030;LOC_Os01g10370
GO:0008610	lipid biosynthetic process	Biological Process	15	1	0.0194406	LOC_Os06g24180;LOC_Os03g43670;LOC_Os03g59040;LOC_Os02g21090;LOC_Os10g40740;LOC_Os01g05840;LOC_Os06g29180;LOC_Os07g33620;LOC_Os12g16640;LOC_Os07g45000;LOC_Os12g23280;LOC_Os01g66740;LOC_Os09g34320;LOC_Os11g42510;LOC_Os04g48930
GO:0000303	response to superoxide	Biological Process	9	1	0.0196538	LOC_Os08g39830;LOC_Os05g04600;LOC_Os03g20650;LOC_Os02g46680;LOC_Os04g54930;LOC_Os12g40920;LOC_Os07g48630;LOC_Os08g43600;LOC_Os09g26880
GO:0052543	callose deposition in cell wall	Biological Process	8	1	0.0199075	LOC_Os02g43560;LOC_Os02g36590;LOC_Os06g11330;LOC_Os07g40940;LOC_Os08g02070;LOC_Os03g30830;LOC_Os04g38780;LOC_Os07g02780
GO:0008219	cell death	Biological Process	14	1	0.0200537	LOC_Os02g35490;LOC_Os01g66510;LOC_Os08g43600;LOC_Os12g26290;LOC_Os11g13670;LOC_Os03g20650;LOC_Os07g06860;LOC_Os07g29330;LOC_Os07g44850;LOC_Os07g05110;LOC_Os12g40920;LOC_Os07g34720;LOC_Os03g12820;LOC_Os03g05310
GO:0009887	organ morphogenesis	Biological Process	26	1	0.0200696	LOC_Os03g21730;LOC_Os08g42690;LOC_Os06g04080;LOC_Os07g49140;LOC_Os08g07890;LOC_Os10g07290;LOC_Os03g03570;LOC_Os02g09740;LOC_Os02g14490;LOC_Os05g50490;LOC_Os02g17710;LOC_Os03g20450;LOC_Os08g34380;LOC_Os02g56540;LOC_Os01g66740;LOC_Os08g14940;LOC_Os03g39020;LOC_Os02g04640;LOC_Os07g35510;LOC_Os06g28480;LOC_Os01g09930;LOC_Os11g42450;LOC_Os03g51240;LOC_Os01g72700;LOC_Os06g16300;LOC_Os09g36280
GO:0009851	auxin biosynthetic process	Biological Process	6	1	0.0200855	LOC_Os10g40740;LOC_Os07g17970;LOC_Os04g47300;LOC_Os07g02140;LOC_Os05g45240;LOC_Os01g67540
GO:0060919	auxin influx	Biological Process	6	1	0.0200855	LOC_Os05g37470;LOC_Os02g46680;LOC_Os11g06820;LOC_Os04g54930;LOC_Os01g63770;LOC_Os05g04600
GO:0010107	potassium ion import	Biological Process	6	1	0.0200855	LOC_Os09g25090;LOC_Os03g43440;LOC_Os12g41090;LOC_Os03g03510;LOC_Os09g25100;LOC_Os01g51420
GO:0009555	pollen development	Biological Process	51	1	0.0204117	LOC_Os12g04980;LOC_Os05g38150;LOC_Os02g17730;LOC_Os02g06150;LOC_Os08g16260;LOC_Os07g41360;LOC_Os05g51670;LOC_Os01g65550;LOC_Os07g18240;LOC_Os02g51890;LOC_Os04g51610;LOC_Os05g12630;LOC_Os08g42350;LOC_Os02g10120;LOC_Os07g04040;LOC_Os07g03870;LOC_Os08g36440;LOC_Os04g38600;LOC_Os09g28210;LOC_Os04g52390;LOC_Os08g03020;LOC_Os08g40170;LOC_Os01g20780;LOC_Os09g27580;LOC_Os01g52710;LOC_Os01g66890;LOC_Os06g…
GO:0005982	starch metabolic process	Biological Process	15	1	0.0205927	LOC_Os03g50970;LOC_Os01g42294;LOC_Os06g46340;LOC_Os07g41320;LOC_Os04g33740;LOC_Os04g39610;LOC_Os07g48830;LOC_Os12g43660;LOC_Os07g31500;LOC_Os04g24430;LOC_Os03g22120;LOC_Os07g41310;LOC_Os02g58480;LOC_Os07g05740;LOC_Os01g60330
GO:0010345	suberin biosynthetic process	Biological Process	11	1	0.020865	LOC_Os01g63930;LOC_Os04g47250;LOC_Os03g04680;LOC_Os09g39410;LOC_Os01g44069;LOC_Os01g63540;LOC_Os04g28570;LOC_Os01g63580;LOC_Os05g37600;LOC_Os10g38110;LOC_Os02g44654
GO:0010089	xylem development	Biological Process	22	1	0.0211223	LOC_Os01g60330;LOC_Os08g01330;LOC_Os06g48160;LOC_Os03g56270;LOC_Os08g13920;LOC_Os03g62090;LOC_Os02g50040;LOC_Os03g18120;LOC_Os04g51460;LOC_Os07g14850;LOC_Os11g01570;LOC_Os06g43860;LOC_Os12g24020;LOC_Os10g34230;LOC_Os07g04190;LOC_Os01g10320;LOC_Os06g48180;LOC_Os06g44310;LOC_Os02g34970;LOC_Os05g31040;LOC_Os03g39020;LOC_Os01g52710
GO:0016099	monoterpenoid biosynthetic process	Biological Process	8	1	0.0218782	LOC_Os08g34580;LOC_Os09g23350;LOC_Os03g14420;LOC_Os08g39730;LOC_Os02g54820;LOC_Os02g36110;LOC_Os06g39780;LOC_Os10g05490
GO:0010351	lithium ion transport	Biological Process	10	1	0.0221775	LOC_Os03g04570;LOC_Os07g48160;LOC_Os01g55260;LOC_Os05g34010;LOC_Os07g01070;LOC_Os03g02390;LOC_Os10g02100;LOC_Os02g21009;LOC_Os06g49220;LOC_Os01g12660
GO:0070887	cellular response to chemical stimulus	Biological Process	5	1	0.022369	LOC_Os11g05690;LOC_Os07g05110;LOC_Os01g43590;LOC_Os03g57080;LOC_Os05g27780
GO:0009687	abscisic acid metabolic process	Biological Process	5	1	0.022369	LOC_Os07g33440;LOC_Os08g38460;LOC_Os07g48680;LOC_Os07g33620;LOC_Os03g45619
GO:0006071	glycerol metabolic process	Biological Process	4	1	0.0228946	LOC_Os04g32320;LOC_Os02g31030;LOC_Os03g40670;LOC_Os04g39610
GO:0006825	copper ion transport	Biological Process	4	1	0.0228946	LOC_Os12g29220;LOC_Os08g42350;LOC_Os02g55134;LOC_Os02g30910
GO:0051938	L-glutamate import	Biological Process	3	1	0.0236122	LOC_Os01g11160;LOC_Os12g06060;LOC_Os11g05690
GO:0010059	positive regulation of atrichoblast fate specification	Biological Process	3	1	0.0236122	LOC_Os07g37810;LOC_Os02g09740;LOC_Os03g08550
GO:0042221	response to chemical	Biological Process	30	1	0.023714	LOC_Os09g26880;LOC_Os05g26660;LOC_Os02g53840;LOC_Os12g29160;LOC_Os08g01100;LOC_Os05g07090;LOC_Os03g31679;LOC_Os02g43640;LOC_Os04g03050;LOC_Os01g20030;LOC_Os04g39150;LOC_Os05g32230;LOC_Os03g04220;LOC_Os06g46680;LOC_Os05g10330;LOC_Os02g43280;LOC_Os02g53360;LOC_Os03g02750;LOC_Os12g38120;LOC_Os10g39740;LOC_Os02g12890;LOC_Os05g48650;LOC_Os01g12520;LOC_Os05g45140;LOC_Os01g32330;LOC_Os04g04060;LOC_Os08g…
GO:0019745	pentacyclic triterpenoid biosynthetic process	Biological Process	10	1	0.0239292	LOC_Os11g18366;LOC_Os08g43120;LOC_Os05g12040;LOC_Os06g47130;LOC_Os01g08260;LOC_Os01g02020;LOC_Os01g42410;LOC_Os02g04760;LOC_Os01g60340;LOC_Os01g11340
GO:0009612	response to mechanical stimulus	Biological Process	14	1	0.0239552	LOC_Os03g20650;LOC_Os06g48160;LOC_Os08g13920;LOC_Os04g51460;LOC_Os01g64730;LOC_Os12g41110;LOC_Os06g48180;LOC_Os04g01740;LOC_Os08g16050;LOC_Os05g12580;LOC_Os06g44310;LOC_Os06g11660;LOC_Os04g53950;LOC_Os02g52780
GO:0009886	post-embryonic morphogenesis	Biological Process	25	1	0.0240994	LOC_Os02g09740;LOC_Os12g01700;LOC_Os11g01620;LOC_Os02g56540;LOC_Os01g66740;LOC_Os02g17710;LOC_Os03g20450;LOC_Os07g05190;LOC_Os11g36000;LOC_Os03g58110;LOC_Os11g06880;LOC_Os07g07990;LOC_Os12g43660;LOC_Os11g07170;LOC_Os07g31500;LOC_Os04g40440;LOC_Os11g35450;LOC_Os05g33690;LOC_Os10g38800;LOC_Os06g28480;LOC_Os03g39020;LOC_Os08g14940;LOC_Os01g58280;LOC_Os10g32990;LOC_Os11g42450
GO:0002679	respiratory burst involved in defense response	Biological Process	32	1	0.0243897	LOC_Os08g35210;LOC_Os06g07030;LOC_Os11g43980;LOC_Os03g52650;LOC_Os05g41990;LOC_Os03g20550;LOC_Os04g08280;LOC_Os06g45580;LOC_Os03g09170;LOC_Os02g06140;LOC_Os11g47870;LOC_Os05g25770;LOC_Os10g25550;LOC_Os04g59370;LOC_Os11g10460;LOC_Os05g10670;LOC_Os04g33740;LOC_Os03g55850;LOC_Os04g51610;LOC_Os07g42510;LOC_Os12g07030;LOC_Os03g24930;LOC_Os03g08460;LOC_Os01g55940;LOC_Os08g36920;LOC_Os05g17604;LOC_Os05g…
GO:0010112	regulation of systemic acquired resistance	Biological Process	5	1	0.0257539	LOC_Os01g51060;LOC_Os07g40290;LOC_Os07g14600;LOC_Os03g18960;LOC_Os01g55940
GO:0015700	arsenite transport	Biological Process	5	1	0.0257539	LOC_Os02g13870;LOC_Os10g36924;LOC_Os06g12310;LOC_Os02g50340;LOC_Os02g51110
GO:0016998	cell wall macromolecule catabolic process	Biological Process	10	1	0.0257785	LOC_Os04g41620;LOC_Os05g33130;LOC_Os09g27890;LOC_Os03g13570;LOC_Os02g53000;LOC_Os02g46910;LOC_Os03g01800;LOC_Os09g37600;LOC_Os04g41640;LOC_Os10g02770
GO:0048467	gynoecium development	Biological Process	8	1	0.026225	LOC_Os01g07500;LOC_Os01g66490;LOC_Os06g04090;LOC_Os06g04870;LOC_Os08g01330;LOC_Os10g42130;LOC_Os06g04850;LOC_Os08g10080
GO:0010091	trichome branching	Biological Process	14	1	0.0268531	LOC_Os04g42950;LOC_Os11g38010;LOC_Os12g43820;LOC_Os08g33660;LOC_Os07g48870;LOC_Os05g50750;LOC_Os12g33070;LOC_Os07g49140;LOC_Os01g12660;LOC_Os04g48070;LOC_Os04g36600;LOC_Os11g42800;LOC_Os01g55260;LOC_Os12g39220
GO:0051188	cofactor biosynthetic process	Biological Process	4	1	0.0273154	LOC_Os03g56950;LOC_Os10g33370;LOC_Os02g56860;LOC_Os10g40740
GO:0048608	reproductive structure development	Biological Process	49	1	0.027837	LOC_Os04g51040;LOC_Os07g35560;LOC_Os08g39240;LOC_Os07g32680;LOC_Os04g29680;LOC_Os10g33370;LOC_Os01g62190;LOC_Os01g06310;LOC_Os07g06860;LOC_Os03g14130;LOC_Os04g20680;LOC_Os02g56860;LOC_Os08g34320;LOC_Os07g01340;LOC_Os07g25810;LOC_Os03g30830;LOC_Os12g10870;LOC_Os04g29960;LOC_Os12g39400;LOC_Os07g35480;LOC_Os07g44850;LOC_Os10g07556;LOC_Os08g42690;LOC_Os04g51030;LOC_Os01g13280;LOC_Os08g14700;LOC_Os02g…
GO:0048235	pollen sperm cell differentiation	Biological Process	8	1	0.028609	LOC_Os01g44069;LOC_Os05g37600;LOC_Os03g54000;LOC_Os04g40940;LOC_Os02g52550;LOC_Os08g38400;LOC_Os06g44300;LOC_Os01g63580
GO:0006891	intra-Golgi vesicle-mediated transport	Biological Process	12	1	0.0287924	LOC_Os06g24180;LOC_Os03g02390;LOC_Os10g02100;LOC_Os06g49220;LOC_Os01g12660;LOC_Os03g04570;LOC_Os12g43363;LOC_Os07g48160;LOC_Os05g34010;LOC_Os01g55260;LOC_Os03g56820;LOC_Os07g01070
GO:0046482	para-aminobenzoic acid metabolic process	Biological Process	11	1	0.0294601	LOC_Os04g58710;LOC_Os08g37874;LOC_Os03g08460;LOC_Os08g36920;LOC_Os07g42510;LOC_Os02g42940;LOC_Os12g07030;LOC_Os01g11860;LOC_Os02g14760;LOC_Os09g30120;LOC_Os09g34214
GO:0010229	inflorescence development	Biological Process	18	1	0.0294841	LOC_Os06g40080;LOC_Os09g35940;LOC_Os10g34230;LOC_Os04g47300;LOC_Os02g42380;LOC_Os10g32900;LOC_Os06g30370;LOC_Os05g45240;LOC_Os01g10110;LOC_Os02g04640;LOC_Os05g46750;LOC_Os08g35860;LOC_Os01g50370;LOC_Os05g40960;LOC_Os01g50400;LOC_Os11g05470;LOC_Os05g31040;LOC_Os01g12490
GO:0016114	terpenoid biosynthetic process	Biological Process	9	1	0.0295802	LOC_Os07g09190;LOC_Os08g07100;LOC_Os05g50550;LOC_Os03g53340;LOC_Os08g07080;LOC_Os11g30560;LOC_Os03g02390;LOC_Os03g47730;LOC_Os06g01934
GO:0007154	cell communication	Biological Process	20	1	0.0297024	LOC_Os07g06570;LOC_Os09g25980;LOC_Os10g25450;LOC_Os03g26870;LOC_Os03g44150;LOC_Os03g55350;LOC_Os03g47730;LOC_Os11g36940;LOC_Os10g07290;LOC_Os02g54640;LOC_Os03g51240;LOC_Os01g64860;LOC_Os01g07376;LOC_Os06g04080;LOC_Os01g20860;LOC_Os02g53200;LOC_Os02g58720;LOC_Os07g37690;LOC_Os01g65030;LOC_Os01g74550
GO:1901601	strigolactone biosynthetic process	Biological Process	3	1	0.0301281	LOC_Os08g02210;LOC_Os03g10620;LOC_Os01g41240
GO:0050891	multicellular organismal water homeostasis	Biological Process	3	1	0.0301281	LOC_Os01g28840;LOC_Os07g08350;LOC_Os01g43460
GO:0006873	cellular ion homeostasis	Biological Process	3	1	0.0301281	LOC_Os01g28840;LOC_Os01g43460;LOC_Os07g08350
GO:0010063	positive regulation of trichoblast fate specification	Biological Process	3	1	0.0301281	LOC_Os07g37810;LOC_Os03g08550;LOC_Os02g09740
GO:0009270	response to humidity	Biological Process	3	1	0.0301281	LOC_Os07g08350;LOC_Os01g43460;LOC_Os01g28840
GO:0006083	acetate metabolic process	Biological Process	3	1	0.0301281	LOC_Os03g19240;LOC_Os03g03790;LOC_Os03g04130
GO:0071461	cellular response to redox state	Biological Process	2	1	0.030818	LOC_Os07g41280;LOC_Os03g30300
GO:0070988	demethylation	Biological Process	2	1	0.030818	LOC_Os12g02500;LOC_Os11g02570
GO:0019544	arginine catabolic process to glutamate	Biological Process	2	1	0.030818	LOC_Os03g21960;LOC_Os03g44150
GO:0030865	cortical cytoskeleton organization	Biological Process	2	1	0.030818	LOC_Os10g35580;LOC_Os04g54940
GO:0033310	chlorophyll a catabolic process	Biological Process	2	1	0.030818	LOC_Os12g02500;LOC_Os11g02570
GO:0006643	membrane lipid metabolic process	Biological Process	2	1	0.030818	LOC_Os06g40180;LOC_Os06g40170
GO:0006917	apoptotic process	Biological Process	2	1	0.030818	LOC_Os05g41670;LOC_Os08g06280
GO:0009645	response to low light intensity stimulus	Biological Process	2	1	0.030818	LOC_Os04g53950;LOC_Os03g10080
GO:0033473	indoleacetic acid conjugate metabolic process	Biological Process	2	1	0.030818	LOC_Os11g02570;LOC_Os12g02500
GO:0046477	glycosylceramide catabolic process	Biological Process	2	1	0.030818	LOC_Os07g48160;LOC_Os10g35070
GO:0071554	cell wall organization or biogenesis	Biological Process	24	1	0.0311849	LOC_Os09g25810;LOC_Os06g35200;LOC_Os03g14654;LOC_Os07g06570;LOC_Os03g08970;LOC_Os12g12934;LOC_Os09g37600;LOC_Os05g25430;LOC_Os02g57110;LOC_Os09g02250;LOC_Os01g48940;LOC_Os02g56860;LOC_Os06g49100;LOC_Os09g25770;LOC_Os10g33370;LOC_Os05g37700;LOC_Os08g28710;LOC_Os07g29330;LOC_Os12g43660;LOC_Os09g34214;LOC_Os09g23300;LOC_Os10g32580;LOC_Os02g51860;LOC_Os07g49080
GO:0016570	histone modification	Biological Process	16	1	0.0316086	LOC_Os07g41310;LOC_Os05g50490;LOC_Os01g39330;LOC_Os12g36100;LOC_Os09g36280;LOC_Os10g07290;LOC_Os02g53000;LOC_Os03g51240;LOC_Os09g27890;LOC_Os06g04080;LOC_Os10g39750;LOC_Os07g35510;LOC_Os07g41320;LOC_Os12g41180;LOC_Os09g39910;LOC_Os04g49560
GO:0009742	brassinosteroid mediated signaling pathway	Biological Process	19	1	0.0316729	LOC_Os05g45240;LOC_Os01g66740;LOC_Os02g06140;LOC_Os05g25350;LOC_Os06g16300;LOC_Os01g22980;LOC_Os08g34380;LOC_Os08g28710;LOC_Os08g07890;LOC_Os11g10750;LOC_Os06g11330;LOC_Os01g12490;LOC_Os04g32540;LOC_Os11g31980;LOC_Os05g34530;LOC_Os03g53400;LOC_Os02g51320;LOC_Os03g43670;LOC_Os10g06630
GO:0007584	response to nutrient	Biological Process	6	1	0.0318672	LOC_Os03g03510;LOC_Os09g25100;LOC_Os03g43440;LOC_Os09g25090;LOC_Os12g41090;LOC_Os04g38780
GO:0080148	negative regulation of response to water deprivation	Biological Process	7	1	0.0320872	LOC_Os10g38780;LOC_Os10g38470;LOC_Os10g38730;LOC_Os01g49720;LOC_Os10g38360;LOC_Os01g49710;LOC_Os10g38710
GO:0010161	red light signaling pathway	Biological Process	7	1	0.0320872	LOC_Os12g04500;LOC_Os01g72330;LOC_Os06g48300;LOC_Os04g36070;LOC_Os10g32900;LOC_Os04g57720;LOC_Os11g04720
GO:2000488	positive regulation of brassinosteroid biosynthetic process	Biological Process	4	1	0.0322101	LOC_Os02g35660;LOC_Os02g39140;LOC_Os04g28280;LOC_Os08g41320
GO:0048366	leaf development	Biological Process	44	1	0.0329145	LOC_Os05g13940;LOC_Os11g05740;LOC_Os01g72700;LOC_Os03g63970;LOC_Os08g42600;LOC_Os02g34600;LOC_Os04g44850;LOC_Os03g08550;LOC_Os02g55890;LOC_Os03g11600;LOC_Os04g53860;LOC_Os07g37810;LOC_Os02g06150;LOC_Os06g49100;LOC_Os11g42510;LOC_Os02g14490;LOC_Os07g06570;LOC_Os10g42030;LOC_Os04g01740;LOC_Os01g08470;LOC_Os08g42840;LOC_Os05g33690;LOC_Os02g06140;LOC_Os06g51440;LOC_Os10g41490;LOC_Os07g32680;LOC_Os11g…
GO:0006970	response to osmotic stress	Biological Process	30	1	0.0330071	LOC_Os03g58420;LOC_Os07g40690;LOC_Os05g25430;LOC_Os01g40094;LOC_Os12g44020;LOC_Os01g09580;LOC_Os06g46920;LOC_Os08g01100;LOC_Os10g40360;LOC_Os12g23280;LOC_Os06g11610;LOC_Os05g46040;LOC_Os01g46760;LOC_Os02g52150;LOC_Os05g38290;LOC_Os07g26630;LOC_Os02g43560;LOC_Os03g12820;LOC_Os03g16170;LOC_Os03g22120;LOC_Os03g43670;LOC_Os03g28330;LOC_Os07g33350;LOC_Os05g05930;LOC_Os01g20860;LOC_Os12g06270;LOC_Os10g…
GO:0032880	regulation of protein localization	Biological Process	19	1	0.0330702	LOC_Os01g39830;LOC_Os05g44030;LOC_Os03g05310;LOC_Os06g04080;LOC_Os12g06660;LOC_Os02g53200;LOC_Os03g06940;LOC_Os04g19740;LOC_Os03g22270;LOC_Os10g36650;LOC_Os03g24930;LOC_Os04g47300;LOC_Os10g25550;LOC_Os10g32900;LOC_Os10g07290;LOC_Os05g25540;LOC_Os11g02840;LOC_Os04g08350;LOC_Os02g12730
GO:0009911	positive regulation of flower development	Biological Process	18	1	0.0337554	LOC_Os01g64730;LOC_Os01g70730;LOC_Os08g43600;LOC_Os08g41320;LOC_Os06g11330;LOC_Os06g39960;LOC_Os07g47450;LOC_Os05g45240;LOC_Os06g30370;LOC_Os02g06140;LOC_Os04g47300;LOC_Os02g35660;LOC_Os03g20650;LOC_Os12g40920;LOC_Os11g05470;LOC_Os01g12490;LOC_Os09g29070;LOC_Os04g28280
GO:0006406	mRNA export from nucleus	Biological Process	15	1	0.0351217	LOC_Os06g21250;LOC_Os06g40150;LOC_Os08g36920;LOC_Os06g39960;LOC_Os01g65550;LOC_Os03g17760;LOC_Os09g31522;LOC_Os09g39910;LOC_Os02g51890;LOC_Os12g07030;LOC_Os03g09170;LOC_Os01g11350;LOC_Os07g41060;LOC_Os04g53860;LOC_Os09g08720
GO:0006749	glutathione metabolic process	Biological Process	7	1	0.0351579	LOC_Os01g49720;LOC_Os10g38730;LOC_Os10g38780;LOC_Os10g38470;LOC_Os10g38710;LOC_Os01g49710;LOC_Os10g38360
GO:0043067	regulation of programmed cell death	Biological Process	27	1	0.0358878	LOC_Os04g52260;LOC_Os02g34970;LOC_Os02g58720;LOC_Os01g22230;LOC_Os09g16950;LOC_Os11g05690;LOC_Os05g42210;LOC_Os01g16450;LOC_Os09g36580;LOC_Os03g35600;LOC_Os06g20150;LOC_Os11g44430;LOC_Os03g14050;LOC_Os01g70970;LOC_Os11g02540;LOC_Os10g05600;LOC_Os02g44320;LOC_Os06g46799;LOC_Os07g04730;LOC_Os04g41350;LOC_Os04g46830;LOC_Os04g32980;LOC_Os12g34524;LOC_Os10g39170;LOC_Os03g43670;LOC_Os08g28710;LOC_Os04g…
GO:0009743	response to carbohydrate	Biological Process	14	1	0.0370932	LOC_Os02g46680;LOC_Os07g46870;LOC_Os09g26880;LOC_Os08g06280;LOC_Os04g54930;LOC_Os03g19290;LOC_Os12g24020;LOC_Os01g41240;LOC_Os01g51890;LOC_Os05g50910;LOC_Os05g04600;LOC_Os01g19770;LOC_Os02g41800;LOC_Os03g20870
GO:0042547	cell wall modification involved in multidimensional cell growth	Biological Process	3	1	0.0374869	LOC_Os04g05050;LOC_Os10g31910;LOC_Os02g50040
GO:0030029	actin filament-based process	Biological Process	3	1	0.0374869	LOC_Os03g41390;LOC_Os12g39400;LOC_Os03g60560
GO:0006809	nitric oxide biosynthetic process	Biological Process	4	1	0.0375845	LOC_Os08g36480;LOC_Os06g23114;LOC_Os02g53130;LOC_Os08g36500
GO:0030026	cellular manganese ion homeostasis	Biological Process	4	1	0.0375845	LOC_Os03g12530;LOC_Os02g21009;LOC_Os01g03914;LOC_Os08g36680
GO:0033466	trans-zeatin biosynthetic process	Biological Process	5	1	0.0377988	LOC_Os03g21400;LOC_Os01g43750;LOC_Os01g43740;LOC_Os07g23570;LOC_Os01g24780
GO:0030048	actin filament-based movement	Biological Process	11	1	0.0379628	LOC_Os11g07680;LOC_Os12g41110;LOC_Os04g44850;LOC_Os05g19670;LOC_Os01g72290;LOC_Os04g39610;LOC_Os11g07670;LOC_Os03g38170;LOC_Os03g44880;LOC_Os03g58980;LOC_Os04g33740
GO:0048638	regulation of developmental growth	Biological Process	7	1	0.0384169	LOC_Os02g22020;LOC_Os02g14490;LOC_Os01g72330;LOC_Os02g17730;LOC_Os01g04230;LOC_Os05g34530;LOC_Os12g38810
GO:0044255	cellular lipid metabolic process	Biological Process	15	1	0.0387467	LOC_Os05g46040;LOC_Os11g29720;LOC_Os10g38360;LOC_Os10g38730;LOC_Os05g49730;LOC_Os10g40740;LOC_Os09g15670;LOC_Os01g49710;LOC_Os01g05840;LOC_Os07g40690;LOC_Os12g36100;LOC_Os03g56950;LOC_Os07g45000;LOC_Os06g49660;LOC_Os06g46920
GO:0043436	oxoacid metabolic process	Biological Process	6	1	0.039152	LOC_Os07g46480;LOC_Os07g34850;LOC_Os09g30414;LOC_Os01g72510;LOC_Os05g48330;LOC_Os06g02900
GO:0010466	negative regulation of peptidase activity	Biological Process	6	1	0.039152	LOC_Os01g03340;LOC_Os01g03310;LOC_Os01g03390;LOC_Os01g04050;LOC_Os03g60840;LOC_Os12g25090
GO:1901564	organonitrogen compound metabolic process	Biological Process	21	1	0.0399133	LOC_Os05g45090;LOC_Os05g45110;LOC_Os11g07670;LOC_Os10g39740;LOC_Os05g25260;LOC_Os04g46990;LOC_Os12g36100;LOC_Os03g04250;LOC_Os01g05840;LOC_Os05g45100;LOC_Os07g49310;LOC_Os10g01920;LOC_Os01g52160;LOC_Os06g19550;LOC_Os04g17100;LOC_Os06g39880;LOC_Os03g04220;LOC_Os07g30610;LOC_Os01g53330;LOC_Os05g35360;LOC_Os01g43270
GO:0006996	organelle organization	Biological Process	41	1	0.0414948	LOC_Os01g04230;LOC_Os07g31500;LOC_Os05g33690;LOC_Os08g42840;LOC_Os12g06060;LOC_Os10g33370;LOC_Os08g28710;LOC_Os05g39840;LOC_Os02g32860;LOC_Os02g56860;LOC_Os02g21090;LOC_Os08g34320;LOC_Os12g16210;LOC_Os07g40690;LOC_Os03g30830;LOC_Os12g23280;LOC_Os03g21730;LOC_Os11g12530;LOC_Os10g40620;LOC_Os04g50204;LOC_Os04g59540;LOC_Os01g72700;LOC_Os01g11160;LOC_Os03g47730;LOC_Os06g29180;LOC_Os03g26870;LOC_Os04g…
GO:0030244	cellulose biosynthetic process	Biological Process	24	1	0.0415734	LOC_Os01g42190;LOC_Os09g30120;LOC_Os10g40420;LOC_Os03g50970;LOC_Os05g25350;LOC_Os05g28830;LOC_Os04g30800;LOC_Os12g36890;LOC_Os03g62090;LOC_Os03g18110;LOC_Os07g41360;LOC_Os11g01570;LOC_Os08g43490;LOC_Os07g36690;LOC_Os05g48810;LOC_Os01g11810;LOC_Os09g27950;LOC_Os03g60300;LOC_Os07g36630;LOC_Os01g64750;LOC_Os01g46350;LOC_Os03g18120;LOC_Os07g14850;LOC_Os12g01560
GO:0040029	regulation of gene expression, epigenetic	Biological Process	22	1	0.0416059	LOC_Os08g14700;LOC_Os07g41060;LOC_Os04g53860;LOC_Os04g17100;LOC_Os09g08720;LOC_Os03g39020;LOC_Os12g35350;LOC_Os02g32860;LOC_Os04g04060;LOC_Os09g31522;LOC_Os07g35480;LOC_Os02g51890;LOC_Os01g20780;LOC_Os07g29330;LOC_Os03g54910;LOC_Os01g65550;LOC_Os03g17760;LOC_Os02g40900;LOC_Os02g56540;LOC_Os07g35520;LOC_Os07g40940;LOC_Os07g35560
GO:0016102	diterpenoid biosynthetic process	Biological Process	10	1	0.0416615	LOC_Os06g30179;LOC_Os02g36190;LOC_Os02g36110;LOC_Os01g72760;LOC_Os04g27020;LOC_Os06g43350;LOC_Os03g14420;LOC_Os03g39650;LOC_Os08g39730;LOC_Os06g39780
GO:0031408	oxylipin biosynthetic process	Biological Process	11	1	0.0427991	LOC_Os08g39840;LOC_Os06g14810;LOC_Os02g49680;LOC_Os01g27230;LOC_Os02g15750;LOC_Os06g14370;LOC_Os07g42420;LOC_Os04g43200;LOC_Os08g39850;LOC_Os02g10120;LOC_Os01g34560
GO:0048509	regulation of meristem development	Biological Process	11	1	0.0427991	LOC_Os01g72700;LOC_Os03g03570;LOC_Os06g28480;LOC_Os02g17730;LOC_Os06g49100;LOC_Os09g24810;LOC_Os04g40440;LOC_Os12g03110;LOC_Os11g42450;LOC_Os07g05740;LOC_Os10g38800
GO:0022414	reproductive process	Biological Process	6	1	0.0431593	LOC_Os02g15690;LOC_Os06g01760;LOC_Os03g03350;LOC_Os07g07230;LOC_Os12g36810;LOC_Os03g45450
GO:0016042	lipid catabolic process	Biological Process	6	1	0.0431593	LOC_Os03g15460;LOC_Os03g02740;LOC_Os06g40170;LOC_Os11g43760;LOC_Os01g46250;LOC_Os06g40180
GO:0051555	flavonol biosynthetic process	Biological Process	6	1	0.0431593	LOC_Os04g44240;LOC_Os02g11700;LOC_Os05g42070;LOC_Os01g45140;LOC_Os05g08480;LOC_Os01g45110
GO:0071368	cellular response to cytokinin stimulus	Biological Process	4	1	0.0434411	LOC_Os02g22020;LOC_Os02g14490;LOC_Os02g04640;LOC_Os05g34530
GO:0006805	xenobiotic metabolic process	Biological Process	4	1	0.0434411	LOC_Os05g45090;LOC_Os07g31960;LOC_Os07g32630;LOC_Os04g46990
GO:0019408	dolichol biosynthetic process	Biological Process	4	1	0.0434411	LOC_Os03g10080;LOC_Os03g40100;LOC_Os04g32110;LOC_Os03g14370
GO:0009311	oligosaccharide metabolic process	Biological Process	10	1	0.0443769	LOC_Os04g29680;LOC_Os10g35070;LOC_Os01g26210;LOC_Os01g26300;LOC_Os04g51040;LOC_Os02g02120;LOC_Os04g29580;LOC_Os08g28710;LOC_Os07g48160;LOC_Os04g29960
GO:0010254	nectary development	Biological Process	2	1	0.0444399	LOC_Os12g04410;LOC_Os03g11600
GO:0071398	cellular response to fatty acid	Biological Process	2	1	0.0444399	LOC_Os02g17940;LOC_Os05g05680
GO:0071277	cellular response to calcium ion	Biological Process	2	1	0.0444399	LOC_Os04g01740;LOC_Os02g49680
GO:0006005	L-fucose biosynthetic process	Biological Process	2	1	0.0444399	LOC_Os08g35760;LOC_Os06g44260
GO:0046185	aldehyde catabolic process	Biological Process	2	1	0.0444399	LOC_Os02g56920;LOC_Os10g33250
GO:0006168	adenine salvage	Biological Process	2	1	0.0444399	LOC_Os04g42520;LOC_Os02g40010
GO:0045841	negative regulation of mitotic metaphase/anaphase transition	Biological Process	2	1	0.0444399	LOC_Os01g70730;LOC_Os07g47450
GO:0006820	anion transport	Biological Process	15	1	0.0446757	LOC_Os02g44770;LOC_Os09g39910;LOC_Os04g46830;LOC_Os07g37510;LOC_Os02g43290;LOC_Os02g58720;LOC_Os07g04040;LOC_Os04g52260;LOC_Os02g44320;LOC_Os01g42960;LOC_Os05g11990;LOC_Os12g24020;LOC_Os12g07150;LOC_Os03g21710;LOC_Os01g46400
GO:0052544	defense response by callose deposition in cell wall	Biological Process	17	1	0.0447886	LOC_Os12g07640;LOC_Os02g49986;LOC_Os02g36890;LOC_Os12g33070;LOC_Os08g33660;LOC_Os02g50340;LOC_Os01g42410;LOC_Os08g05520;LOC_Os01g08260;LOC_Os01g36460;LOC_Os01g65370;LOC_Os08g43120;LOC_Os04g52780;LOC_Os07g37210;LOC_Os06g14670;LOC_Os09g23620;LOC_Os03g58320
GO:0009828	plant-type cell wall loosening	Biological Process	7	1	0.045513	LOC_Os05g39990;LOC_Os02g42650;LOC_Os03g60720;LOC_Os02g44108;LOC_Os06g41700;LOC_Os01g60770;LOC_Os07g31390
GO:0009877	nodulation	Biological Process	3	1	0.0456715	LOC_Os02g13870;LOC_Os03g22120;LOC_Os03g28330
GO:0010482	regulation of epidermal cell division	Biological Process	3	1	0.0456715	LOC_Os02g42430;LOC_Os04g44500;LOC_Os12g29400
GO:0010098	suspensor development	Biological Process	3	1	0.0456715	LOC_Os02g58480;LOC_Os03g22120;LOC_Os04g24430
GO:0007032	endosome organization	Biological Process	3	1	0.0456715	LOC_Os01g55260;LOC_Os01g12660;LOC_Os05g50750
GO:0010118	stomatal movement	Biological Process	14	1	0.0475504	LOC_Os03g43440;LOC_Os01g10890;LOC_Os06g14370;LOC_Os12g03150;LOC_Os11g03440;LOC_Os01g51420;LOC_Os09g25090;LOC_Os12g41090;LOC_Os03g21260;LOC_Os04g43200;LOC_Os09g25100;LOC_Os03g03510;LOC_Os01g21420;LOC_Os04g59540
GO:0006952	defense response	Biological Process	155	1	0.0478056	LOC_Os10g38800;LOC_Os06g13560;LOC_Os08g41290;LOC_Os01g09930;LOC_Os02g21090;LOC_Os02g36210;LOC_Os03g18850;LOC_Os03g20450;LOC_Os10g39970;LOC_Os02g48770;LOC_Os04g33920;LOC_Os12g23280;LOC_Os02g36264;LOC_Os05g03920;LOC_Os02g43290;LOC_Os03g08790;LOC_Os05g11910;LOC_Os11g12530;LOC_Os11g08100;LOC_Os01g41550;LOC_Os08g16660;LOC_Os01g72700;LOC_Os04g53750;LOC_Os01g71810;LOC_Os02g53530;LOC_Os03g62670;LOC_Os02g…
GO:0019252	starch biosynthetic process	Biological Process	25	1	0.0488661	LOC_Os08g02120;LOC_Os09g12290;LOC_Os03g38170;LOC_Os09g29070;LOC_Os10g38470;LOC_Os06g39712;LOC_Os05g51630;LOC_Os03g04240;LOC_Os02g49680;LOC_Os06g45710;LOC_Os05g47540;LOC_Os02g10120;LOC_Os10g38360;LOC_Os04g44830;LOC_Os11g42800;LOC_Os07g22930;LOC_Os10g25030;LOC_Os08g39840;LOC_Os07g04190;LOC_Os08g39850;LOC_Os06g23684;LOC_Os07g46790;LOC_Os03g56270;LOC_Os04g02050;LOC_Os06g04200
GO:0019222	regulation of metabolic process	Biological Process	15	1	0.0489676	LOC_Os01g15039;LOC_Os07g48510;LOC_Os01g57854;LOC_Os01g72700;LOC_Os06g09340;LOC_Os11g36160;LOC_Os11g07170;LOC_Os03g03570;LOC_Os10g38800;LOC_Os04g46560;LOC_Os02g06150;LOC_Os04g32980;LOC_Os06g28480;LOC_Os02g54190;LOC_Os12g39320
GO:0043090	amino acid import	Biological Process	24	1	0.0492438	LOC_Os05g04600;LOC_Os05g33900;LOC_Os12g08090;LOC_Os03g05530;LOC_Os04g51610;LOC_Os01g36580;LOC_Os11g37260;LOC_Os04g54930;LOC_Os04g59120;LOC_Os06g01966;LOC_Os04g47420;LOC_Os03g52650;LOC_Os02g01210;LOC_Os08g38400;LOC_Os06g01972;LOC_Os07g34070;LOC_Os02g46680;LOC_Os04g47300;LOC_Os02g52930;LOC_Os03g54000;LOC_Os07g04180;LOC_Os12g09300;LOC_Os04g40410;LOC_Os05g10670
GO:0009648	photoperiodism	Biological Process	4	1	0.0497797	LOC_Os12g06060;LOC_Os11g05690;LOC_Os01g11160;LOC_Os12g40920
GO:0010337	regulation of salicylic acid metabolic process	Biological Process	4	1	0.0497797	LOC_Os07g47590;LOC_Os10g40420;LOC_Os03g44810;LOC_Os02g50340
GO:0006644	phospholipid metabolic process	Biological Process	4	1	0.0497797	LOC_Os02g02930;LOC_Os07g05110;LOC_Os03g57080;LOC_Os03g15460
GO:0001676	long-chain fatty acid metabolic process	Biological Process	4	1	0.0497797	LOC_Os11g06880;LOC_Os12g26290;LOC_Os05g04170;LOC_Os11g35400
GO:0034641	cellular nitrogen compound metabolic process	Biological Process	16	1	0.0500249	LOC_Os07g46480;LOC_Os01g11860;LOC_Os10g01920;LOC_Os02g51930;LOC_Os09g25570;LOC_Os09g30414;LOC_Os03g04250;LOC_Os06g19530;LOC_Os06g40818;LOC_Os05g05170;LOC_Os01g58640;LOC_Os03g14370;LOC_Os05g48330;LOC_Os06g20040;LOC_Os08g37940;LOC_Os06g02780
GO:0009640	photomorphogenesis	Biological Process	35	1	0.0528659	LOC_Os03g40100;LOC_Os06g40150;LOC_Os08g43600;LOC_Os04g54930;LOC_Os06g14370;LOC_Os01g09580;LOC_Os08g36920;LOC_Os12g39220;LOC_Os12g40920;LOC_Os02g51320;LOC_Os12g07030;LOC_Os09g27320;LOC_Os04g43200;LOC_Os12g03110;LOC_Os01g16650;LOC_Os01g13280;LOC_Os05g04600;LOC_Os04g32110;LOC_Os07g02540;LOC_Os12g10660;LOC_Os06g50900;LOC_Os11g32100;LOC_Os02g46680;LOC_Os02g07930;LOC_Os03g09170;LOC_Os03g43670;LOC_Os06g…
GO:0009821	alkaloid biosynthetic process	Biological Process	8	1	0.0531723	LOC_Os08g39860;LOC_Os09g17560;LOC_Os06g49660;LOC_Os08g19420;LOC_Os04g39880;LOC_Os10g35950;LOC_Os06g21570;LOC_Os05g43940
GO:0009607	response to biotic stimulus	Biological Process	7	1	0.0533973	LOC_Os11g07670;LOC_Os04g39150;LOC_Os03g18850;LOC_Os02g35490;LOC_Os01g66510;LOC_Os08g28670;LOC_Os04g04060
GO:0043412	macromolecule modification	Biological Process	19	1	0.0535689	LOC_Os07g35560;LOC_Os07g35520;LOC_Os04g40440;LOC_Os11g35450;LOC_Os07g40940;LOC_Os07g40690;LOC_Os12g12120;LOC_Os03g28040;LOC_Os12g10870;LOC_Os03g54910;LOC_Os06g46920;LOC_Os01g19480;LOC_Os07g07040;LOC_Os07g35480;LOC_Os11g36000;LOC_Os03g39020;LOC_Os09g02250;LOC_Os03g11400;LOC_Os08g14700
GO:0009958	positive gravitropism	Biological Process	16	1	0.0544585	LOC_Os06g50230;LOC_Os02g46680;LOC_Os04g54940;LOC_Os01g07500;LOC_Os05g48810;LOC_Os04g54930;LOC_Os08g43490;LOC_Os11g05320;LOC_Os05g04600;LOC_Os01g63770;LOC_Os01g42190;LOC_Os05g37470;LOC_Os05g50550;LOC_Os10g35580;LOC_Os08g35160;LOC_Os11g06820
GO:0001736	establishment of planar polarity	Biological Process	3	1	0.0546579	LOC_Os05g37470;LOC_Os11g06820;LOC_Os01g63770
GO:0048445	carpel morphogenesis	Biological Process	3	1	0.0546579	LOC_Os02g17680;LOC_Os09g35940;LOC_Os03g53340
GO:0016139	glycoside catabolic process	Biological Process	3	1	0.0546579	LOC_Os07g48160;LOC_Os01g57770;LOC_Os10g35070
GO:0009606	tropism	Biological Process	3	1	0.0546579	LOC_Os05g08530;LOC_Os03g10880;LOC_Os01g08130
GO:0080164	regulation of nitric oxide metabolic process	Biological Process	3	1	0.0546579	LOC_Os01g04330;LOC_Os12g04360;LOC_Os09g28500
GO:2000605	positive regulation of secondary growth	Biological Process	3	1	0.0546579	LOC_Os01g04230;LOC_Os01g42294;LOC_Os01g60330
GO:0010215	cellulose microfibril organization	Biological Process	3	1	0.0546579	LOC_Os07g41320;LOC_Os07g41310;LOC_Os07g49080
GO:0044767	single-organism developmental process	Biological Process	92	1	0.0549192	LOC_Os01g08670;LOC_Os08g29020;LOC_Os04g49360;LOC_Os02g53360;LOC_Os02g56490;LOC_Os06g43170;LOC_Os02g52780;LOC_Os05g43140;LOC_Os09g18230;LOC_Os04g32030;LOC_Os08g44620;LOC_Os01g57450;LOC_Os11g06880;LOC_Os03g57880;LOC_Os06g43870;LOC_Os11g07960;LOC_Os08g34390;LOC_Os04g57550;LOC_Os12g29160;LOC_Os05g02390;LOC_Os06g50950;LOC_Os12g12120;LOC_Os05g39840;LOC_Os01g47780;LOC_Os09g02250;LOC_Os02g49950;LOC_Os01g…
GO:0043414	macromolecule methylation	Biological Process	13	1	0.0557104	LOC_Os03g51240;LOC_Os08g06550;LOC_Os10g07290;LOC_Os05g14590;LOC_Os09g36280;LOC_Os12g36100;LOC_Os05g50490;LOC_Os05g46750;LOC_Os12g41180;LOC_Os07g35510;LOC_Os06g04080;LOC_Os01g50400;LOC_Os01g50370
GO:0016043	cellular component organization	Biological Process	161	1	0.0558684	LOC_Os07g36210;LOC_Os01g68900;LOC_Os06g48030;LOC_Os07g34850;LOC_Os01g57854;LOC_Os08g24790;LOC_Os05g47680;LOC_Os08g37940;LOC_Os12g01360;LOC_Os01g25540;LOC_Os09g38670;LOC_Os10g32580;LOC_Os01g42960;LOC_Os02g35490;LOC_Os01g24710;LOC_Os04g58710;LOC_Os06g02780;LOC_Os04g49950;LOC_Os03g03980;LOC_Os10g11980;LOC_Os02g57110;LOC_Os01g15039;LOC_Os04g43710;LOC_Os05g31670;LOC_Os01g26270;LOC_Os02g54190;LOC_Os01g…
GO:0000272	polysaccharide catabolic process	Biological Process	15	1	0.0559321	LOC_Os04g41640;LOC_Os12g43660;LOC_Os03g03570;LOC_Os01g60330;LOC_Os10g38800;LOC_Os07g41310;LOC_Os03g22790;LOC_Os07g41320;LOC_Os01g42294;LOC_Os03g50970;LOC_Os10g32990;LOC_Os04g39610;LOC_Os09g29070;LOC_Os04g41620;LOC_Os05g33130
GO:0006733	oxidoreduction coenzyme metabolic process	Biological Process	10	1	0.056428	LOC_Os01g34560;LOC_Os02g10120;LOC_Os07g42420;LOC_Os02g49480;LOC_Os08g39850;LOC_Os01g06640;LOC_Os11g42510;LOC_Os06g14810;LOC_Os08g39840;LOC_Os02g15750
GO:0010093	specification of floral organ identity	Biological Process	15	1	0.0583973	LOC_Os09g27320;LOC_Os11g48000;LOC_Os02g54820;LOC_Os04g17100;LOC_Os03g11600;LOC_Os03g21030;LOC_Os07g40300;LOC_Os09g23350;LOC_Os01g52160;LOC_Os06g11330;LOC_Os07g06620;LOC_Os08g34580;LOC_Os01g41200;LOC_Os07g01180;LOC_Os02g50040
GO:0033216	ferric iron import	Biological Process	1	1	0.0589463	LOC_Os04g48930
GO:0006657	CDP-choline pathway	Biological Process	1	1	0.0589463	LOC_Os06g40500
GO:0006778	porphyrin-containing compound metabolic process	Biological Process	1	1	0.0589463	LOC_Os05g05930
GO:0043335	protein unfolding	Biological Process	1	1	0.0589463	LOC_Os05g44340
GO:1901430	positive regulation of syringal lignin biosynthetic process	Biological Process	1	1	0.0589463	LOC_Os08g05520
GO:0080142	regulation of salicylic acid biosynthetic process	Biological Process	1	1	0.0589463	LOC_Os03g18960
GO:0019310	inositol catabolic process	Biological Process	1	1	0.0589463	LOC_Os06g36560
GO:0006562	proline catabolic process	Biological Process	1	1	0.0589463	LOC_Os10g40360
GO:0046246	terpene biosynthetic process	Biological Process	1	1	0.0589463	LOC_Os02g02930
GO:0042326	negative regulation of phosphorylation	Biological Process	1	1	0.0589463	LOC_Os05g32440
GO:1901529	positive regulation of anion channel activity	Biological Process	1	1	0.0589463	LOC_Os07g05190
GO:0019295	coenzyme M biosynthetic process	Biological Process	1	1	0.0589463	LOC_Os06g46900
GO:1901528	hydrogen peroxide mediated signaling pathway involved in stomatal movement	Biological Process	1	1	0.0589463	LOC_Os07g05190
GO:0033611	oxalate catabolic process	Biological Process	1	1	0.0589463	LOC_Os04g58710
GO:0030198	extracellular matrix organization	Biological Process	1	1	0.0589463	LOC_Os08g41290
GO:0010730	negative regulation of hydrogen peroxide biosynthetic process	Biological Process	1	1	0.0589463	LOC_Os03g45280
GO:0005993	trehalose catabolic process	Biological Process	1	1	0.0589463	LOC_Os10g37660
GO:0055068	cobalt ion homeostasis	Biological Process	1	1	0.0589463	LOC_Os06g36450
GO:0000024	maltose biosynthetic process	Biological Process	1	1	0.0589463	LOC_Os10g41550
GO:0033215	iron assimilation by reduction and transport	Biological Process	1	1	0.0589463	LOC_Os04g48930
GO:0019477	L-lysine catabolic process	Biological Process	1	1	0.0589463	LOC_Os02g54254
GO:0003156	regulation of organ formation	Biological Process	1	1	0.0589463	LOC_Os03g12790
GO:1901527	abscisic acid-activated signaling pathway involved in stomatal movement	Biological Process	1	1	0.0589463	LOC_Os07g05190
GO:0012502	induction of programmed cell death	Biological Process	1	1	0.0589463	LOC_Os02g15930
GO:0007035	vacuolar acidification	Biological Process	1	1	0.0589463	LOC_Os03g08560
GO:0001561	fatty acid alpha-oxidation	Biological Process	1	1	0.0589463	LOC_Os12g26290
GO:0019458	methionine catabolic process via 2-oxobutanoate	Biological Process	1	1	0.0589463	LOC_Os10g37340
GO:0010159	specification of organ position	Biological Process	2	1	0.0598234	LOC_Os03g11600;LOC_Os07g06620
GO:0051592	response to calcium ion	Biological Process	2	1	0.0598234	LOC_Os02g21009;LOC_Os02g18410
GO:0009652	thigmotropism	Biological Process	2	1	0.0598234	LOC_Os10g35580;LOC_Os04g54940
GO:0001560	regulation of cell growth by extracellular stimulus	Biological Process	2	1	0.0598234	LOC_Os06g23684;LOC_Os11g42510
GO:0080127	fruit septum development	Biological Process	2	1	0.0598234	LOC_Os06g04870;LOC_Os06g04850
GO:0042891	antibiotic transport	Biological Process	2	1	0.0598234	LOC_Os01g61940;LOC_Os05g02890
GO:0042762	regulation of sulfur metabolic process	Biological Process	2	1	0.0598234	LOC_Os07g48630;LOC_Os08g39830
GO:1900384	regulation of flavonol biosynthetic process	Biological Process	2	1	0.0598234	LOC_Os03g04240;LOC_Os03g04250
GO:0044209	AMP salvage	Biological Process	2	1	0.0598234	LOC_Os04g42520;LOC_Os02g40010
GO:2000652	regulation of secondary cell wall biogenesis	Biological Process	2	1	0.0598234	LOC_Os08g05520;LOC_Os06g43860
GO:0009061	anaerobic respiration	Biological Process	2	1	0.0598234	LOC_Os12g05210;LOC_Os11g05170
GO:0050829	defense response to Gram-negative bacterium	Biological Process	2	1	0.0598234	LOC_Os03g03810;LOC_Os08g35760
GO:0033993	response to lipid	Biological Process	15	1	0.0609356	LOC_Os02g06150;LOC_Os06g28480;LOC_Os07g44950;LOC_Os12g39320;LOC_Os03g58350;LOC_Os01g09640;LOC_Os11g01620;LOC_Os03g58470;LOC_Os07g01340;LOC_Os03g08970;LOC_Os12g40900;LOC_Os12g01700;LOC_Os04g45690;LOC_Os04g35500;LOC_Os04g47250
GO:0006879	cellular iron ion homeostasis	Biological Process	6	1	0.0616865	LOC_Os03g38170;LOC_Os11g01530;LOC_Os03g11734;LOC_Os01g47400;LOC_Os07g15370;LOC_Os12g01530
GO:0071310	cellular response to organic substance	Biological Process	43	1	0.0618457	LOC_Os02g41710;LOC_Os12g17530;LOC_Os10g05600;LOC_Os09g37050;LOC_Os10g39750;LOC_Os04g22120;LOC_Os03g41390;LOC_Os03g26870;LOC_Os01g66510;LOC_Os09g29360;LOC_Os04g43710;LOC_Os04g52260;LOC_Os07g30610;LOC_Os03g60560;LOC_Os12g41180;LOC_Os04g33820;LOC_Os07g30620;LOC_Os08g34580;LOC_Os05g02390;LOC_Os06g39875;LOC_Os08g03020;LOC_Os03g14050;LOC_Os01g70970;LOC_Os01g23970;LOC_Os07g04730;LOC_Os03g16334;LOC_Os03g…
GO:0016569	covalent chromatin modification	Biological Process	9	1	0.0626072	LOC_Os07g35520;LOC_Os02g45170;LOC_Os07g40940;LOC_Os08g06550;LOC_Os07g35480;LOC_Os07g35560;LOC_Os08g14700;LOC_Os03g54910;LOC_Os02g56540
GO:0042754	negative regulation of circadian rhythm	Biological Process	9	1	0.0626072	LOC_Os06g21250;LOC_Os09g31522;LOC_Os02g51890;LOC_Os07g41060;LOC_Os01g65550;LOC_Os04g53860;LOC_Os03g17760;LOC_Os09g08720;LOC_Os05g37060
GO:0000380	alternative mRNA splicing, via spliceosome	Biological Process	10	1	0.0631868	LOC_Os03g17760;LOC_Os04g53860;LOC_Os01g65550;LOC_Os07g41060;LOC_Os02g40900;LOC_Os09g08720;LOC_Os06g21250;LOC_Os09g31522;LOC_Os01g20780;LOC_Os02g51890
GO:0009789	positive regulation of abscisic acid-activated signaling pathway	Biological Process	10	1	0.0631868	LOC_Os02g34600;LOC_Os10g41490;LOC_Os03g18600;LOC_Os01g42960;LOC_Os03g20870;LOC_Os05g11990;LOC_Os05g50990;LOC_Os07g48680;LOC_Os08g38460;LOC_Os03g38170
GO:0045454	cell redox homeostasis	Biological Process	15	1	0.0635476	LOC_Os05g50990;LOC_Os05g11990;LOC_Os01g11160;LOC_Os07g48510;LOC_Os01g42960;LOC_Os09g38670;LOC_Os02g47790;LOC_Os12g06060;LOC_Os01g47760;LOC_Os04g44830;LOC_Os04g53730;LOC_Os03g29190;LOC_Os01g27140;LOC_Os01g09830;LOC_Os01g07376
GO:0042214	terpene metabolic process	Biological Process	4	1	0.0638885	LOC_Os12g12470;LOC_Os04g45000;LOC_Os01g66740;LOC_Os12g12514
GO:0046622	positive regulation of organ growth	Biological Process	3	1	0.0644163	LOC_Os05g34530;LOC_Os11g29720;LOC_Os09g35940
GO:1901566	organonitrogen compound biosynthetic process	Biological Process	12	1	0.0654024	LOC_Os06g38980;LOC_Os01g50370;LOC_Os07g05460;LOC_Os10g33370;LOC_Os02g54060;LOC_Os01g50400;LOC_Os03g56950;LOC_Os02g56860;LOC_Os03g47730;LOC_Os07g02140;LOC_Os05g46750;LOC_Os10g11980
GO:0031347	regulation of defense response	Biological Process	32	1	0.0654192	LOC_Os09g37050;LOC_Os08g35210;LOC_Os07g40300;LOC_Os02g41710;LOC_Os08g10310;LOC_Os02g02400;LOC_Os02g06150;LOC_Os02g42620;LOC_Os05g25350;LOC_Os04g30040;LOC_Os09g25070;LOC_Os07g02780;LOC_Os02g50340;LOC_Os08g33660;LOC_Os02g35490;LOC_Os03g28300;LOC_Os09g29360;LOC_Os09g18230;LOC_Os04g57630;LOC_Os12g38770;LOC_Os10g36924;LOC_Os12g41180;LOC_Os11g05690;LOC_Os02g06090;LOC_Os06g35200;LOC_Os11g36000;LOC_Os12g…
GO:0006863	purine nucleobase transport	Biological Process	15	1	0.066234	LOC_Os04g52310;LOC_Os08g37432;LOC_Os03g42830;LOC_Os07g37210;LOC_Os06g14670;LOC_Os03g25550;LOC_Os07g08350;LOC_Os02g36890;LOC_Os04g37990;LOC_Os02g49986;LOC_Os01g28840;LOC_Os08g33660;LOC_Os01g43460;LOC_Os11g03440;LOC_Os09g38510
GO:0006855	drug transmembrane transport	Biological Process	10	1	0.0667534	LOC_Os08g43120;LOC_Os08g37432;LOC_Os03g11734;LOC_Os03g42830;LOC_Os03g12790;LOC_Os10g20470;LOC_Os09g35600;LOC_Os01g08260;LOC_Os09g37600;LOC_Os01g42410
GO:0006732	coenzyme metabolic process	Biological Process	6	1	0.06695	LOC_Os06g24180;LOC_Os10g33370;LOC_Os06g01934;LOC_Os03g47730;LOC_Os10g40740;LOC_Os02g56860
GO:0051301	cell division	Biological Process	37	1	0.0679195	LOC_Os06g16300;LOC_Os12g24320;LOC_Os05g33690;LOC_Os06g51110;LOC_Os08g37390;LOC_Os10g41430;LOC_Os05g50750;LOC_Os02g35440;LOC_Os01g72700;LOC_Os01g59120;LOC_Os01g10320;LOC_Os01g55260;LOC_Os11g42450;LOC_Os04g40940;LOC_Os05g41390;LOC_Os06g01620;LOC_Os02g06150;LOC_Os02g54820;LOC_Os02g41800;LOC_Os03g09170;LOC_Os10g36650;LOC_Os04g04060;LOC_Os02g17710;LOC_Os07g06570;LOC_Os03g20450;LOC_Os08g40170;LOC_Os08g…
GO:0042939	tripeptide transport	Biological Process	8	1	0.0693637	LOC_Os03g60850;LOC_Os10g02100;LOC_Os06g15370;LOC_Os06g49220;LOC_Os10g40600;LOC_Os03g04570;LOC_Os05g34010;LOC_Os07g01070
GO:0044283	small molecule biosynthetic process	Biological Process	8	1	0.0693637	LOC_Os01g66740;LOC_Os04g52260;LOC_Os04g48930;LOC_Os11g07670;LOC_Os05g26660;LOC_Os07g40940;LOC_Os01g11160;LOC_Os08g42690
GO:0000904	cell morphogenesis involved in differentiation	Biological Process	8	1	0.0693637	LOC_Os06g49100;LOC_Os03g39020;LOC_Os03g26490;LOC_Os02g04540;LOC_Os04g59540;LOC_Os01g08470;LOC_Os10g05750;LOC_Os04g42620
GO:0016311	dephosphorylation	Biological Process	5	1	0.0707663	LOC_Os03g13540;LOC_Os03g57950;LOC_Os03g60370;LOC_Os01g51890;LOC_Os01g52230
GO:1900425	negative regulation of defense response to bacterium	Biological Process	6	1	0.0724666	LOC_Os07g04040;LOC_Os07g18230;LOC_Os09g16950;LOC_Os07g03870;LOC_Os01g02370;LOC_Os07g18240
GO:0016458	gene silencing	Biological Process	13	1	0.0733438	LOC_Os04g17100;LOC_Os08g14700;LOC_Os12g35350;LOC_Os02g32860;LOC_Os01g32330;LOC_Os05g39850;LOC_Os04g04060;LOC_Os07g35480;LOC_Os03g54910;LOC_Os02g56540;LOC_Os07g35520;LOC_Os07g40940;LOC_Os07g35560
GO:0042938	dipeptide transport	Biological Process	8	1	0.0738345	LOC_Os05g34010;LOC_Os07g01070;LOC_Os03g04570;LOC_Os06g49220;LOC_Os06g15370;LOC_Os10g40600;LOC_Os03g60850;LOC_Os10g02100
GO:0048581	negative regulation of post-embryonic development	Biological Process	3	1	0.074912	LOC_Os03g56950;LOC_Os04g45690;LOC_Os02g49480
GO:0010094	specification of carpel identity	Biological Process	3	1	0.074912	LOC_Os11g42800;LOC_Os12g39220;LOC_Os12g36100
GO:0034620	cellular response to unfolded protein	Biological Process	3	1	0.074912	LOC_Os03g53340;LOC_Os06g35960;LOC_Os02g13800
GO:0034440	lipid oxidation	Biological Process	3	1	0.074912	LOC_Os08g39840;LOC_Os02g10120;LOC_Os08g39850
GO:0009807	lignan biosynthetic process	Biological Process	3	1	0.074912	LOC_Os11g07670;LOC_Os12g16220;LOC_Os07g44920
GO:0009892	negative regulation of metabolic process	Biological Process	3	1	0.074912	LOC_Os03g20090;LOC_Os07g48870;LOC_Os11g45740
GO:0007094	mitotic spindle assembly checkpoint	Biological Process	2	1	0.0767137	LOC_Os02g10020;LOC_Os04g40940
GO:0010450	inflorescence meristem growth	Biological Process	2	1	0.0767137	LOC_Os07g06620;LOC_Os03g11600
GO:0006572	tyrosine catabolic process	Biological Process	2	1	0.0767137	LOC_Os11g42510;LOC_Os06g23684
GO:0015819	lysine transport	Biological Process	2	1	0.0767137	LOC_Os01g12520;LOC_Os01g11160
GO:0009395	phospholipid catabolic process	Biological Process	2	1	0.0767137	LOC_Os09g33820;LOC_Os03g63580
GO:0051640	organelle localization	Biological Process	2	1	0.0767137	LOC_Os09g28500;LOC_Os12g04360
GO:0009084	glutamine family amino acid biosynthetic process	Biological Process	2	1	0.0767137	LOC_Os04g52440;LOC_Os03g21960
GO:0009268	response to pH	Biological Process	2	1	0.0767137	LOC_Os03g43440;LOC_Os12g41090
GO:0071241	cellular response to inorganic substance	Biological Process	2	1	0.0767137	LOC_Os01g70310;LOC_Os10g39750
GO:0016540	protein autoprocessing	Biological Process	2	1	0.0767137	LOC_Os03g27120;LOC_Os05g41670
GO:0048833	specification of floral organ number	Biological Process	5	1	0.0774192	LOC_Os07g06620;LOC_Os07g04190;LOC_Os02g06140;LOC_Os03g56270;LOC_Os03g11600
GO:0070301	cellular response to hydrogen peroxide	Biological Process	5	1	0.0774192	LOC_Os03g45450;LOC_Os09g25070;LOC_Os09g34214;LOC_Os03g58420;LOC_Os02g43560
GO:0016044	membrane organization	Biological Process	16	1	0.0777598	LOC_Os03g35600;LOC_Os08g28710;LOC_Os11g44430;LOC_Os03g14050;LOC_Os01g70970;LOC_Os11g02540;LOC_Os07g40300;LOC_Os10g05600;LOC_Os07g04730;LOC_Os04g41350;LOC_Os05g42210;LOC_Os09g16950;LOC_Os11g05690;LOC_Os08g42690;LOC_Os09g36580;LOC_Os06g01934
GO:0048504	regulation of timing of organ formation	Biological Process	6	1	0.0782354	LOC_Os08g10080;LOC_Os08g01330;LOC_Os11g29720;LOC_Os09g35940;LOC_Os06g04090;LOC_Os03g21030
GO:0008544	epidermis development	Biological Process	23	1	0.079627	LOC_Os11g07170;LOC_Os07g31500;LOC_Os04g40440;LOC_Os11g35450;LOC_Os08g02030;LOC_Os05g33690;LOC_Os08g42840;LOC_Os07g29330;LOC_Os10g38800;LOC_Os02g06150;LOC_Os02g17730;LOC_Os10g32990;LOC_Os11g42450;LOC_Os11g36160;LOC_Os12g36100;LOC_Os01g66740;LOC_Os02g17710;LOC_Os02g06090;LOC_Os12g17570;LOC_Os07g07230;LOC_Os11g12530;LOC_Os04g52780;LOC_Os04g57630
GO:0009690	cytokinin metabolic process	Biological Process	4	1	0.0798582	LOC_Os05g31040;LOC_Os07g13634;LOC_Os10g34230;LOC_Os01g10110
GO:0048439	flower morphogenesis	Biological Process	13	1	0.0799426	LOC_Os06g16300;LOC_Os08g34380;LOC_Os03g02240;LOC_Os08g07890;LOC_Os02g41460;LOC_Os03g47730;LOC_Os01g10320;LOC_Os11g42800;LOC_Os03g50970;LOC_Os12g04410;LOC_Os06g01934;LOC_Os01g66890;LOC_Os02g45170
GO:0000280	nuclear division	Biological Process	7	1	0.0819019	LOC_Os04g32110;LOC_Os11g42800;LOC_Os03g50970;LOC_Os03g14370;LOC_Os03g43670;LOC_Os03g40100;LOC_Os01g36390
GO:0003002	regionalization	Biological Process	15	1	0.0839422	LOC_Os06g28480;LOC_Os08g42690;LOC_Os06g01934;LOC_Os11g12530;LOC_Os01g72700;LOC_Os12g43660;LOC_Os03g47730;LOC_Os03g10880;LOC_Os04g40440;LOC_Os01g08130;LOC_Os01g66740;LOC_Os05g33690;LOC_Os03g20450;LOC_Os05g08530;LOC_Os09g27060
GO:0009636	response to toxic substance	Biological Process	5	1	0.084396	LOC_Os01g53330;LOC_Os01g43270;LOC_Os01g53420;LOC_Os05g45100;LOC_Os05g45110
GO:0006662	glycerol ether metabolic process	Biological Process	5	1	0.084396	LOC_Os04g53730;LOC_Os04g44830;LOC_Os09g38670;LOC_Os07g48510;LOC_Os01g07376
GO:0010042	response to manganese ion	Biological Process	3	1	0.0861066	LOC_Os08g36680;LOC_Os01g03914;LOC_Os03g12530
GO:0080055	low-affinity nitrate transport	Biological Process	3	1	0.0861066	LOC_Os06g15370;LOC_Os10g40600;LOC_Os05g34010
GO:0010071	root meristem specification	Biological Process	3	1	0.0861066	LOC_Os03g08550;LOC_Os07g37810;LOC_Os02g09740
GO:0071577	zinc ion transmembrane transport	Biological Process	3	1	0.0861066	LOC_Os04g52320;LOC_Os04g52310;LOC_Os05g10840
GO:0043447	alkane biosynthetic process	Biological Process	3	1	0.0861066	LOC_Os10g33250;LOC_Os02g56920;LOC_Os06g44300
GO:0044271	cellular nitrogen compound biosynthetic process	Biological Process	10	1	0.0864842	LOC_Os03g21960;LOC_Os01g19480;LOC_Os10g11980;LOC_Os05g11990;LOC_Os01g42960;LOC_Os04g52440;LOC_Os02g56860;LOC_Os03g53910;LOC_Os03g44150;LOC_Os10g33370
GO:0031668	cellular response to extracellular stimulus	Biological Process	10	1	0.0864842	LOC_Os10g38360;LOC_Os01g49710;LOC_Os06g39780;LOC_Os01g23970;LOC_Os10g05490;LOC_Os01g58280;LOC_Os02g36110;LOC_Os04g03050;LOC_Os10g38730;LOC_Os11g10710
GO:0071369	cellular response to ethylene stimulus	Biological Process	9	1	0.0878068	LOC_Os01g47400;LOC_Os07g03870;LOC_Os07g04040;LOC_Os03g11734;LOC_Os07g18240;LOC_Os11g32100;LOC_Os06g43860;LOC_Os07g18230;LOC_Os03g62314
GO:0044260	cellular macromolecule metabolic process	Biological Process	112	1	0.0881516	LOC_Os09g23300;LOC_Os12g40010;LOC_Os01g10950;LOC_Os01g10180;LOC_Os08g14940;LOC_Os02g56860;LOC_Os03g27110;LOC_Os08g02990;LOC_Os03g08970;LOC_Os05g50470;LOC_Os11g05640;LOC_Os06g01990;LOC_Os04g42620;LOC_Os01g68900;LOC_Os07g36210;LOC_Os07g05190;LOC_Os07g35480;LOC_Os10g40620;LOC_Os04g57630;LOC_Os08g03400;LOC_Os04g40440;LOC_Os01g09640;LOC_Os11g11350;LOC_Os11g35450;LOC_Os11g43760;LOC_Os07g34040;LOC_Os11g…
GO:0010501	RNA secondary structure unwinding	Biological Process	8	1	0.0882665	LOC_Os02g51890;LOC_Os09g31522;LOC_Os06g21250;LOC_Os09g08720;LOC_Os07g41060;LOC_Os01g65550;LOC_Os03g17760;LOC_Os04g53860
GO:0048480	stigma development	Biological Process	4	1	0.0885149	LOC_Os04g47250;LOC_Os02g44654;LOC_Os01g63540;LOC_Os01g63930
GO:0048446	petal morphogenesis	Biological Process	4	1	0.0885149	LOC_Os04g28280;LOC_Os02g35660;LOC_Os03g02240;LOC_Os08g41320
GO:0019593	mannitol biosynthetic process	Biological Process	4	1	0.0885149	LOC_Os07g10840;LOC_Os06g07600;LOC_Os09g25090;LOC_Os01g10890
GO:0010623	developmental programmed cell death	Biological Process	4	1	0.0885149	LOC_Os01g73980;LOC_Os05g01810;LOC_Os02g48450;LOC_Os04g57440
GO:0006807	nitrogen compound metabolic process	Biological Process	26	1	0.0888274	LOC_Os07g02200;LOC_Os03g45210;LOC_Os11g06570;LOC_Os08g01940;LOC_Os03g50260;LOC_Os10g05750;LOC_Os11g43760;LOC_Os07g01070;LOC_Os12g01370;LOC_Os10g40600;LOC_Os08g17160;LOC_Os01g50090;LOC_Os05g34010;LOC_Os08g31030;LOC_Os01g71170;LOC_Os10g28120;LOC_Os07g05190;LOC_Os05g12630;LOC_Os07g30620;LOC_Os03g31679;LOC_Os06g48560;LOC_Os06g15370;LOC_Os11g01340;LOC_Os12g12934;LOC_Os03g60850;LOC_Os06g02410
GO:0009889	regulation of biosynthetic process	Biological Process	5	1	0.0916917	LOC_Os11g42450;LOC_Os04g53990;LOC_Os12g43450;LOC_Os03g21730;LOC_Os02g45010
GO:0005992	trehalose biosynthetic process	Biological Process	5	1	0.0916917	LOC_Os01g66490;LOC_Os09g23350;LOC_Os02g54820;LOC_Os02g51680;LOC_Os08g34580
GO:0031062	positive regulation of histone methylation	Biological Process	9	1	0.0925161	LOC_Os04g53860;LOC_Os03g17760;LOC_Os07g41060;LOC_Os01g65550;LOC_Os09g08720;LOC_Os02g40900;LOC_Os09g31522;LOC_Os02g51890;LOC_Os01g20780
GO:0010452	histone H3-K36 methylation	Biological Process	9	1	0.0925161	LOC_Os09g31522;LOC_Os01g20780;LOC_Os02g51890;LOC_Os07g41060;LOC_Os01g65550;LOC_Os03g17760;LOC_Os04g53860;LOC_Os02g40900;LOC_Os09g08720
GO:0042752	regulation of circadian rhythm	Biological Process	11	1	0.092711	LOC_Os01g72330;LOC_Os12g04500;LOC_Os04g36070;LOC_Os12g16220;LOC_Os11g07460;LOC_Os02g35180;LOC_Os04g57720;LOC_Os11g04720;LOC_Os10g41490;LOC_Os02g34600;LOC_Os10g06630
GO:0055085	transmembrane transport	Biological Process	46	1	0.0930327	LOC_Os02g36490;LOC_Os03g54000;LOC_Os12g42910;LOC_Os04g51830;LOC_Os08g28170;LOC_Os02g14980;LOC_Os09g38130;LOC_Os02g58530;LOC_Os01g28840;LOC_Os02g41710;LOC_Os04g45900;LOC_Os03g09940;LOC_Os01g36720;LOC_Os01g12520;LOC_Os08g38400;LOC_Os11g04060;LOC_Os07g08350;LOC_Os04g51820;LOC_Os01g43460;LOC_Os04g54930;LOC_Os07g37510;LOC_Os04g10690;LOC_Os07g47100;LOC_Os01g17214;LOC_Os02g44770;LOC_Os02g46680;LOC_Os01g…
GO:0009662	etioplast organization	Biological Process	8	1	0.093416	LOC_Os09g31522;LOC_Os02g51890;LOC_Os06g21250;LOC_Os03g17760;LOC_Os04g53860;LOC_Os01g65550;LOC_Os07g41060;LOC_Os09g08720
GO:0071423	malate transmembrane transport	Biological Process	2	1	0.0948799	LOC_Os08g39370;LOC_Os09g31130
GO:0051289	protein homotetramerization	Biological Process	2	1	0.0948799	LOC_Os10g37340;LOC_Os01g54030
GO:0033383	geranyl diphosphate metabolic process	Biological Process	2	1	0.0948799	LOC_Os03g22620;LOC_Os03g24760
GO:0051762	sesquiterpene biosynthetic process	Biological Process	2	1	0.0948799	LOC_Os08g07100;LOC_Os08g07080
GO:0006166	purine ribonucleoside salvage	Biological Process	2	1	0.0948799	LOC_Os02g40010;LOC_Os04g42520
GO:0040009	regulation of growth rate	Biological Process	2	1	0.0948799	LOC_Os11g29720;LOC_Os09g35940
GO:0051792	medium-chain fatty acid biosynthetic process	Biological Process	2	1	0.0948799	LOC_Os09g26960;LOC_Os09g08990
GO:0048569	post-embryonic organ development	Biological Process	11	1	0.0969312	LOC_Os04g29960;LOC_Os04g51030;LOC_Os11g05320;LOC_Os10g07556;LOC_Os01g45700;LOC_Os08g39240;LOC_Os11g35240;LOC_Os04g20680;LOC_Os09g39910;LOC_Os03g26490;LOC_Os05g34530
GO:0010264	myo-inositol hexakisphosphate biosynthetic process	Biological Process	11	1	0.0969312	LOC_Os02g13870;LOC_Os07g06470;LOC_Os02g51110;LOC_Os08g06550;LOC_Os10g36924;LOC_Os01g03914;LOC_Os10g25130;LOC_Os07g22930;LOC_Os06g04200;LOC_Os05g39250;LOC_Os03g12530
GO:0032940	secretion by cell	Biological Process	6	1	0.0970356	LOC_Os01g45110;LOC_Os01g45140;LOC_Os01g55940;LOC_Os05g31040;LOC_Os10g34230;LOC_Os05g04700
GO:0070417	cellular response to cold	Biological Process	4	1	0.0976019	LOC_Os03g20120;LOC_Os07g48830;LOC_Os06g40120;LOC_Os05g49170
GO:0006109	regulation of carbohydrate metabolic process	Biological Process	4	1	0.0976019	LOC_Os04g44830;LOC_Os06g22870;LOC_Os03g38170;LOC_Os12g40890
GO:0007267	cell-cell signaling	Biological Process	12	1	0.097791	LOC_Os03g02040;LOC_Os08g07890;LOC_Os06g16300;LOC_Os08g34380;LOC_Os01g25540;LOC_Os02g57840;LOC_Os02g50330;LOC_Os01g25560;LOC_Os02g44940;LOC_Os03g50970;LOC_Os11g26880;LOC_Os08g31030
GO:0071705	nitrogen compound transport	Biological Process	14	1	0.0978431	LOC_Os01g42960;LOC_Os05g11990;LOC_Os12g07150;LOC_Os03g21710;LOC_Os01g46400;LOC_Os08g31580;LOC_Os04g46830;LOC_Os05g03920;LOC_Os07g37510;LOC_Os09g18230;LOC_Os02g43290;LOC_Os07g04040;LOC_Os04g52260;LOC_Os02g44320
GO:0006012	galactose metabolic process	Biological Process	3	1	0.0979588	LOC_Os05g51670;LOC_Os07g48830;LOC_Os03g20120
GO:0006827	high-affinity iron ion transmembrane transport	Biological Process	3	1	0.0979588	LOC_Os01g41200;LOC_Os04g17100;LOC_Os01g52160
GO:0000023	maltose metabolic process	Biological Process	19	1	0.0988564	LOC_Os08g39840;LOC_Os10g38470;LOC_Os10g25030;LOC_Os03g38170;LOC_Os09g29070;LOC_Os11g42800;LOC_Os04g44830;LOC_Os02g10120;LOC_Os10g38360;LOC_Os05g47540;LOC_Os09g12290;LOC_Os06g45710;LOC_Os02g49680;LOC_Os05g51630;LOC_Os04g02050;LOC_Os03g56270;LOC_Os07g04190;LOC_Os08g39850;LOC_Os06g39712
GO:0010078	maintenance of root meristem identity	Biological Process	5	1	0.0993002	LOC_Os05g50750;LOC_Os01g07500;LOC_Os01g55260;LOC_Os01g12660;LOC_Os02g45170
GO:0007000	nucleolus organization	Biological Process	5	1	0.0993002	LOC_Os01g36390;LOC_Os03g40100;LOC_Os03g43670;LOC_Os03g14370;LOC_Os04g32110
GO:0032787	monocarboxylic acid metabolic process	Biological Process	10	1	0.0998492	LOC_Os08g41320;LOC_Os01g11160;LOC_Os03g21960;LOC_Os04g46990;LOC_Os05g25260;LOC_Os02g54060;LOC_Os12g06060;LOC_Os03g56950;LOC_Os03g04250;LOC_Os10g38730
GO:0006623	protein targeting to vacuole	Biological Process	24	1	0.10307	LOC_Os04g44500;LOC_Os12g06270;LOC_Os12g29400;LOC_Os04g53860;LOC_Os01g55260;LOC_Os03g53400;LOC_Os07g48229;LOC_Os06g30370;LOC_Os01g65550;LOC_Os09g25860;LOC_Os01g44130;LOC_Os11g05470;LOC_Os01g16650;LOC_Os09g08720;LOC_Os02g02830;LOC_Os09g31522;LOC_Os02g51890;LOC_Os07g16970;LOC_Os05g07090;LOC_Os06g33170;LOC_Os03g03980;LOC_Os03g17760;LOC_Os03g60580;LOC_Os01g12660
GO:0045490	pectin catabolic process	Biological Process	6	1	0.103791	LOC_Os07g04190;LOC_Os11g12530;LOC_Os05g44600;LOC_Os03g56270;LOC_Os01g21034;LOC_Os04g05050
GO:0006569	tryptophan catabolic process	Biological Process	11	1	0.10571	LOC_Os10g38360;LOC_Os03g58320;LOC_Os03g18600;LOC_Os12g32850;LOC_Os04g44850;LOC_Os06g23684;LOC_Os09g32670;LOC_Os04g02050;LOC_Os12g38770;LOC_Os10g38470;LOC_Os05g12580
GO:0010540	basipetal auxin transport	Biological Process	12	1	0.106103	LOC_Os01g17214;LOC_Os11g05320;LOC_Os05g04600;LOC_Os03g03510;LOC_Os09g25100;LOC_Os11g04060;LOC_Os02g46680;LOC_Os09g25090;LOC_Os12g41090;LOC_Os04g54930;LOC_Os03g43440;LOC_Os01g10890
GO:0009556	microsporogenesis	Biological Process	12	1	0.106103	LOC_Os08g34380;LOC_Os06g16300;LOC_Os01g66740;LOC_Os06g11330;LOC_Os02g36590;LOC_Os07g02780;LOC_Os08g07890;LOC_Os08g02070;LOC_Os04g52320;LOC_Os02g43560;LOC_Os04g38780;LOC_Os04g28570
GO:0090332	stomatal closure	Biological Process	4	1	0.107104	LOC_Os04g01740;LOC_Os01g28840;LOC_Os07g08350;LOC_Os01g43460
GO:0071822	protein complex subunit organization	Biological Process	4	1	0.107104	LOC_Os01g50400;LOC_Os07g29330;LOC_Os01g50370;LOC_Os05g46750
GO:0042430	indole-containing compound metabolic process	Biological Process	9	1	0.107511	LOC_Os01g50370;LOC_Os03g04240;LOC_Os07g05460;LOC_Os12g06060;LOC_Os02g54060;LOC_Os01g50400;LOC_Os01g11160;LOC_Os10g38710;LOC_Os05g46750
GO:0048518	positive regulation of biological process	Biological Process	14	1	0.109215	LOC_Os05g49420;LOC_Os07g44950;LOC_Os11g42450;LOC_Os01g68720;LOC_Os02g45010;LOC_Os06g49100;LOC_Os05g46040;LOC_Os04g45690;LOC_Os03g56950;LOC_Os08g24790;LOC_Os01g40094;LOC_Os03g47730;LOC_Os12g01700;LOC_Os12g43660
GO:0009108	coenzyme biosynthetic process	Biological Process	10	1	0.109392	LOC_Os07g42420;LOC_Os06g23684;LOC_Os02g49480;LOC_Os08g39850;LOC_Os01g34560;LOC_Os02g10120;LOC_Os06g14810;LOC_Os08g39840;LOC_Os02g15750;LOC_Os01g06640
GO:0018130	heterocycle biosynthetic process	Biological Process	12	1	0.110411	LOC_Os03g18030;LOC_Os01g53330;LOC_Os02g17940;LOC_Os01g53420;LOC_Os01g43270;LOC_Os03g53910;LOC_Os04g52440;LOC_Os02g56860;LOC_Os10g33370;LOC_Os03g21960;LOC_Os05g11990;LOC_Os01g42960
GO:0010031	circumnutation	Biological Process	3	1	0.110425	LOC_Os04g36070;LOC_Os12g16220;LOC_Os03g11400
GO:0006875	cellular metal ion homeostasis	Biological Process	3	1	0.110425	LOC_Os03g54000;LOC_Os02g54640;LOC_Os09g25980
GO:0034052	positive regulation of plant-type hypersensitive response	Biological Process	3	1	0.110425	LOC_Os01g55940;LOC_Os08g06280;LOC_Os07g40290
GO:0051501	diterpene phytoalexin metabolic process	Biological Process	3	1	0.110425	LOC_Os11g28530;LOC_Os02g36140;LOC_Os02g36264
GO:0010188	response to microbial phytotoxin	Biological Process	3	1	0.110425	LOC_Os11g42510;LOC_Os06g23684;LOC_Os01g07376
GO:0010289	homogalacturonan biosynthetic process	Biological Process	3	1	0.110425	LOC_Os02g51860;LOC_Os06g12280;LOC_Os01g52710
GO:2000026	regulation of multicellular organismal development	Biological Process	23	1	0.114045	LOC_Os02g35970;LOC_Os03g57780;LOC_Os05g14590;LOC_Os03g31679;LOC_Os12g36100;LOC_Os04g42620;LOC_Os02g17710;LOC_Os03g02240;LOC_Os03g20450;LOC_Os02g06090;LOC_Os03g26490;LOC_Os07g07990;LOC_Os05g32230;LOC_Os06g48500;LOC_Os11g07170;LOC_Os03g47730;LOC_Os11g43760;LOC_Os03g22790;LOC_Os04g31710;LOC_Os02g06150;LOC_Os08g14940;LOC_Os07g02200;LOC_Os10g32990
GO:0010166	wax metabolic process	Biological Process	2	1	0.114113	LOC_Os06g40150;LOC_Os02g10760
GO:0048442	sepal development	Biological Process	2	1	0.114113	LOC_Os02g41800;LOC_Os03g02240
GO:0019374	galactolipid metabolic process	Biological Process	2	1	0.114113	LOC_Os03g57080;LOC_Os07g05110
GO:0046942	carboxylic acid transport	Biological Process	2	1	0.114113	LOC_Os12g12934;LOC_Os01g12470
GO:0044264	cellular polysaccharide metabolic process	Biological Process	2	1	0.114113	LOC_Os01g70970;LOC_Os11g29780
GO:0006042	glucosamine biosynthetic process	Biological Process	1	1	0.114419	LOC_Os12g03720
GO:0051783	regulation of nuclear division	Biological Process	1	1	0.114419	LOC_Os08g42600
GO:0075733	intracellular transport of virus	Biological Process	1	1	0.114419	LOC_Os02g18410
GO:0031456	glycine betaine biosynthetic process	Biological Process	1	1	0.114419	LOC_Os06g39230
GO:0010350	cellular response to magnesium starvation	Biological Process	1	1	0.114419	LOC_Os02g18410
GO:0015801	aromatic amino acid transport	Biological Process	1	1	0.114419	LOC_Os03g60260
GO:0031117	positive regulation of microtubule depolymerization	Biological Process	1	1	0.114419	LOC_Os02g18410
GO:0051511	negative regulation of unidimensional cell growth	Biological Process	1	1	0.114419	LOC_Os02g18410
GO:0051502	diterpene phytoalexin biosynthetic process	Biological Process	1	1	0.114419	LOC_Os04g10160
GO:0015791	polyol transport	Biological Process	1	1	0.114419	LOC_Os08g06010
GO:0043401	steroid hormone mediated signaling pathway	Biological Process	1	1	0.114419	LOC_Os04g40700
GO:0042149	cellular response to glucose starvation	Biological Process	1	1	0.114419	LOC_Os03g63940
GO:0071286	cellular response to magnesium ion	Biological Process	1	1	0.114419	LOC_Os02g18410
GO:0022619	generative cell differentiation	Biological Process	1	1	0.114419	LOC_Os08g42600
GO:0046184	aldehyde biosynthetic process	Biological Process	1	1	0.114419	LOC_Os06g44300
GO:0072709	cellular response to sorbitol	Biological Process	1	1	0.114419	LOC_Os02g18410
GO:0006593	ornithine catabolic process	Biological Process	1	1	0.114419	LOC_Os03g44150
GO:0006788	heme oxidation	Biological Process	1	1	0.114419	LOC_Os06g40080
GO:0006537	glutamate biosynthetic process	Biological Process	1	1	0.114419	LOC_Os10g40360
GO:0034484	raffinose catabolic process	Biological Process	1	1	0.114419	LOC_Os07g10840
GO:0000707	meiotic DNA recombinase assembly	Biological Process	1	1	0.114419	LOC_Os12g04980
GO:0061077	chaperone-mediated protein folding	Biological Process	1	1	0.114419	LOC_Os03g59320
GO:0019500	cyanide catabolic process	Biological Process	1	1	0.114419	LOC_Os04g08350
GO:0006880	intracellular sequestering of iron ion	Biological Process	1	1	0.114419	LOC_Os09g23300
GO:0016578	histone deubiquitination	Biological Process	1	1	0.114419	LOC_Os04g33820
GO:0071370	cellular response to gibberellin stimulus	Biological Process	1	1	0.114419	LOC_Os02g01590
GO:0071325	cellular response to mannitol stimulus	Biological Process	1	1	0.114419	LOC_Os02g18410
GO:0071280	cellular response to copper ion	Biological Process	1	1	0.114419	LOC_Os02g18410
GO:0015774	polysaccharide transport	Biological Process	1	1	0.114419	LOC_Os02g51750
GO:1901562	response to paraquat	Biological Process	1	1	0.114419	LOC_Os01g12470
GO:0000025	maltose catabolic process	Biological Process	1	1	0.114419	LOC_Os07g46790
GO:0031115	negative regulation of microtubule polymerization	Biological Process	1	1	0.114419	LOC_Os02g18410
GO:0052865	1-deoxy-D-xylulose 5-phosphate biosynthetic process	Biological Process	1	1	0.114419	LOC_Os07g09190
GO:0046475	glycerophospholipid catabolic process	Biological Process	1	1	0.114419	LOC_Os01g20860
GO:0080064	4,4-dimethyl-9beta,19-cyclopropylsterol oxidation	Biological Process	1	1	0.114419	LOC_Os03g01820
GO:0060148	positive regulation of posttranscriptional gene silencing	Biological Process	1	1	0.114419	LOC_Os02g50330
GO:0015794	glycerol-3-phosphate transport	Biological Process	1	1	0.114419	LOC_Os08g06010
GO:2000036	regulation of stem cell maintenance	Biological Process	1	1	0.114419	LOC_Os08g42600
GO:0070206	protein trimerization	Biological Process	1	1	0.114419	LOC_Os04g02050
GO:0010376	stomatal complex formation	Biological Process	1	1	0.114419	LOC_Os08g40170
GO:0010036	response to boron-containing substance	Biological Process	1	1	0.114419	LOC_Os12g37840
GO:0048219	inter-Golgi cisterna vesicle-mediated transport	Biological Process	1	1	0.114419	LOC_Os08g41340
GO:0010041	response to iron(III) ion	Biological Process	1	1	0.114419	LOC_Os07g07410
GO:0010158	abaxial cell fate specification	Biological Process	5	1	0.115427	LOC_Os07g06620;LOC_Os02g14490;LOC_Os02g04640;LOC_Os05g40960;LOC_Os03g11600
GO:0007623	circadian rhythm	Biological Process	27	1	0.116823	LOC_Os10g32900;LOC_Os02g40900;LOC_Os02g42380;LOC_Os05g51630;LOC_Os01g74020;LOC_Os01g09640;LOC_Os02g02930;LOC_Os04g40630;LOC_Os02g49480;LOC_Os02g21090;LOC_Os05g40960;LOC_Os10g40740;LOC_Os01g06640;LOC_Os06g01620;LOC_Os03g43670;LOC_Os04g57720;LOC_Os11g04720;LOC_Os02g04640;LOC_Os01g66890;LOC_Os01g20780;LOC_Os07g37810;LOC_Os12g04500;LOC_Os12g23280;LOC_Os07g46790;LOC_Os02g09740;LOC_Os03g01330;LOC_Os03g…
GO:0001558	regulation of cell growth	Biological Process	4	1	0.117005	LOC_Os05g42200;LOC_Os05g41390;LOC_Os08g42600;LOC_Os01g59120
GO:0010455	positive regulation of cell fate commitment	Biological Process	4	1	0.117005	LOC_Os06g04090;LOC_Os03g21030;LOC_Os08g10080;LOC_Os08g01330
GO:0071407	cellular response to organic cyclic compound	Biological Process	7	1	0.117654	LOC_Os05g25430;LOC_Os03g47730;LOC_Os02g17730;LOC_Os06g01934;LOC_Os11g44430;LOC_Os07g06570;LOC_Os03g28300
GO:0016117	carotenoid biosynthetic process	Biological Process	20	1	0.118925	LOC_Os04g43200;LOC_Os02g51890;LOC_Os09g31522;LOC_Os07g42420;LOC_Os02g10120;LOC_Os10g25030;LOC_Os06g14810;LOC_Os08g39840;LOC_Os11g42800;LOC_Os09g08720;LOC_Os07g41060;LOC_Os04g53860;LOC_Os08g39850;LOC_Os06g14370;LOC_Os01g34560;LOC_Os06g21250;LOC_Os02g12890;LOC_Os01g65550;LOC_Os03g17760;LOC_Os12g43130
GO:0009106	lipoate metabolic process	Biological Process	10	1	0.119434	LOC_Os02g10120;LOC_Os01g34560;LOC_Os07g42420;LOC_Os08g39850;LOC_Os02g49480;LOC_Os06g23684;LOC_Os01g06640;LOC_Os08g39840;LOC_Os06g14810;LOC_Os02g15750
GO:0000902	cell morphogenesis	Biological Process	23	1	0.120051	LOC_Os07g37810;LOC_Os12g06270;LOC_Os11g01330;LOC_Os01g48940;LOC_Os06g07220;LOC_Os12g28770;LOC_Os06g29180;LOC_Os07g32680;LOC_Os03g08550;LOC_Os02g40260;LOC_Os12g38810;LOC_Os03g62090;LOC_Os01g35330;LOC_Os08g42690;LOC_Os01g45700;LOC_Os11g01040;LOC_Os10g19180;LOC_Os02g09740;LOC_Os12g16210;LOC_Os07g25810;LOC_Os07g14850;LOC_Os03g60580;LOC_Os02g56540
GO:0009791	post-embryonic development	Biological Process	79	1	0.12027	LOC_Os04g38780;LOC_Os07g35480;LOC_Os07g44850;LOC_Os03g07180;LOC_Os12g39400;LOC_Os09g28280;LOC_Os01g24710;LOC_Os04g49950;LOC_Os02g56860;LOC_Os01g62190;LOC_Os03g14130;LOC_Os10g05750;LOC_Os08g31060;LOC_Os07g32680;LOC_Os01g26270;LOC_Os04g28420;LOC_Os07g07040;LOC_Os05g13900;LOC_Os05g25430;LOC_Os01g08130;LOC_Os01g68720;LOC_Os02g15810;LOC_Os12g43510;LOC_Os03g41390;LOC_Os04g46110;LOC_Os02g40260;LOC_Os05g…
GO:0006355	regulation of transcription, DNA-templated	Biological Process	164	1	0.121284	LOC_Os01g02790;LOC_Os04g40700;LOC_Os06g11330;LOC_Os07g28890;LOC_Os08g43600;LOC_Os04g45810;LOC_Os04g56170;LOC_Os06g03670;LOC_Os08g31580;LOC_Os01g32770;LOC_Os09g37710;LOC_Os05g49420;LOC_Os01g72330;LOC_Os03g53340;LOC_Os10g05600;LOC_Os03g58350;LOC_Os06g43860;LOC_Os05g42180;LOC_Os12g39220;LOC_Os03g01330;LOC_Os04g28280;LOC_Os02g43820;LOC_Os01g50400;LOC_Os02g13520;LOC_Os07g27650;LOC_Os01g02560;LOC_Os07g…
GO:0070588	calcium ion transmembrane transport	Biological Process	3	1	0.123461	LOC_Os04g51610;LOC_Os02g21009;LOC_Os02g51750
GO:0007292	female gamete generation	Biological Process	3	1	0.123461	LOC_Os01g55260;LOC_Os01g12660;LOC_Os05g50750
GO:0052386	cell wall thickening	Biological Process	3	1	0.123461	LOC_Os03g62090;LOC_Os07g14850;LOC_Os04g44850
GO:0071470	cellular response to osmotic stress	Biological Process	3	1	0.123461	LOC_Os12g29220;LOC_Os08g42350;LOC_Os02g30910
GO:0010208	pollen wall assembly	Biological Process	3	1	0.123461	LOC_Os11g29720;LOC_Os06g24180;LOC_Os05g50550
GO:0032922	circadian regulation of gene expression	Biological Process	3	1	0.123461	LOC_Os01g64360;LOC_Os05g37060;LOC_Os06g51260
GO:0009817	defense response to fungus, incompatible interaction	Biological Process	12	1	0.123934	LOC_Os11g37950;LOC_Os03g46060;LOC_Os08g43120;LOC_Os02g48450;LOC_Os12g43450;LOC_Os01g57770;LOC_Os03g15050;LOC_Os01g71810;LOC_Os01g08260;LOC_Os01g42410;LOC_Os01g66510;LOC_Os01g71474
GO:0006396	RNA processing	Biological Process	56	1	0.126049	LOC_Os09g34320;LOC_Os02g33780;LOC_Os02g47790;LOC_Os07g08390;LOC_Os01g72510;LOC_Os07g40690;LOC_Os01g14960;LOC_Os01g41240;LOC_Os12g38350;LOC_Os10g34700;LOC_Os09g27160;LOC_Os09g30490;LOC_Os01g03130;LOC_Os12g38320;LOC_Os04g40410;LOC_Os10g34010;LOC_Os02g39510;LOC_Os02g04380;LOC_Os09g39410;LOC_Os03g16334;LOC_Os11g45990;LOC_Os07g04150;LOC_Os03g06250;LOC_Os03g23960;LOC_Os07g10840;LOC_Os10g39090;LOC_Os06g…
GO:0010555	response to mannitol	Biological Process	4	1	0.127286	LOC_Os02g58480;LOC_Os03g03510;LOC_Os04g24430;LOC_Os03g22120
GO:0048574	long-day photoperiodism, flowering	Biological Process	4	1	0.127286	LOC_Os12g16220;LOC_Os05g37060;LOC_Os06g51260;LOC_Os05g51630
GO:0015995	chlorophyll biosynthetic process	Biological Process	16	1	0.129363	LOC_Os01g06640;LOC_Os11g05290;LOC_Os02g15750;LOC_Os10g25030;LOC_Os07g09190;LOC_Os06g14810;LOC_Os08g39840;LOC_Os02g10120;LOC_Os01g33160;LOC_Os04g43200;LOC_Os07g42420;LOC_Os01g34560;LOC_Os02g49480;LOC_Os08g39850;LOC_Os06g14370;LOC_Os10g35644
GO:0009581	detection of external stimulus	Biological Process	10	1	0.129969	LOC_Os01g02370;LOC_Os02g06140;LOC_Os02g17710;LOC_Os01g02400;LOC_Os01g02780;LOC_Os01g02570;LOC_Os01g02600;LOC_Os01g02790;LOC_Os01g02560;LOC_Os01g02580
GO:0009058	biosynthetic process	Biological Process	15	1	0.131849	LOC_Os11g35930;LOC_Os11g42510;LOC_Os04g29960;LOC_Os02g58480;LOC_Os03g22120;LOC_Os04g24430;LOC_Os10g25130;LOC_Os01g26270;LOC_Os04g51030;LOC_Os05g45140;LOC_Os03g28330;LOC_Os10g07556;LOC_Os07g34260;LOC_Os02g06090;LOC_Os04g20680
GO:0010044	response to aluminum ion	Biological Process	5	1	0.13271	LOC_Os06g40170;LOC_Os07g15370;LOC_Os03g02740;LOC_Os03g27370;LOC_Os06g40180
GO:0009992	cellular water homeostasis	Biological Process	8	1	0.134085	LOC_Os04g29960;LOC_Os04g29580;LOC_Os08g28710;LOC_Os02g02120;LOC_Os01g26300;LOC_Os04g51040;LOC_Os01g26210;LOC_Os04g29680
GO:0010507	negative regulation of autophagy	Biological Process	2	1	0.134224	LOC_Os08g36440;LOC_Os01g52780
GO:0010600	regulation of auxin biosynthetic process	Biological Process	2	1	0.134224	LOC_Os01g06640;LOC_Os02g49480
GO:0048878	chemical homeostasis	Biological Process	2	1	0.134224	LOC_Os03g45619;LOC_Os07g29960
GO:0016052	carbohydrate catabolic process	Biological Process	2	1	0.134224	LOC_Os04g39880;LOC_Os08g39860
GO:0009747	hexokinase-dependent signaling	Biological Process	2	1	0.134224	LOC_Os01g09460;LOC_Os01g71320
GO:0010083	regulation of vegetative meristem growth	Biological Process	2	1	0.134224	LOC_Os10g33900;LOC_Os03g01880
GO:0043562	cellular response to nitrogen levels	Biological Process	2	1	0.134224	LOC_Os02g50350;LOC_Os03g21960
GO:0048832	specification of organ number	Biological Process	2	1	0.134224	LOC_Os10g33900;LOC_Os03g01880
GO:0009833	plant-type primary cell wall biogenesis	Biological Process	2	1	0.134224	LOC_Os03g62090;LOC_Os07g14850
GO:0072330	monocarboxylic acid biosynthetic process	Biological Process	11	1	0.134709	LOC_Os10g25130;LOC_Os11g15040;LOC_Os10g40740;LOC_Os05g01140;LOC_Os07g05460;LOC_Os06g01934;LOC_Os06g20790;LOC_Os06g24180;LOC_Os06g13560;LOC_Os02g48770;LOC_Os03g47730
GO:1901360	organic cyclic compound metabolic process	Biological Process	33	1	0.136839	LOC_Os09g30414;LOC_Os08g45060;LOC_Os04g46990;LOC_Os06g02900;LOC_Os02g20560;LOC_Os02g17710;LOC_Os05g45090;LOC_Os03g24560;LOC_Os11g36160;LOC_Os06g19550;LOC_Os07g34850;LOC_Os09g35600;LOC_Os06g15370;LOC_Os11g06880;LOC_Os12g26880;LOC_Os05g34010;LOC_Os07g05190;LOC_Os05g05170;LOC_Os01g58640;LOC_Os05g48330;LOC_Os01g71170;LOC_Os08g37940;LOC_Os03g04250;LOC_Os06g07300;LOC_Os05g45110;LOC_Os08g17160;LOC_Os11g…
GO:0006621	protein retention in ER lumen	Biological Process	3	1	0.137021	LOC_Os04g30800;LOC_Os03g16920;LOC_Os05g38530
GO:0015994	chlorophyll metabolic process	Biological Process	3	1	0.137021	LOC_Os02g56860;LOC_Os10g33370;LOC_Os02g49680
GO:0009701	isoflavonoid phytoalexin biosynthetic process	Biological Process	3	1	0.137021	LOC_Os08g19420;LOC_Os05g43940;LOC_Os09g17560
GO:0043966	histone H3 acetylation	Biological Process	3	1	0.137021	LOC_Os01g64360;LOC_Os06g51260;LOC_Os05g37060
GO:0030497	fatty acid elongation	Biological Process	4	1	0.13793	LOC_Os01g34560;LOC_Os02g56860;LOC_Os06g14810;LOC_Os10g33370
GO:0009553	embryo sac development	Biological Process	18	1	0.139133	LOC_Os03g26870;LOC_Os02g45620;LOC_Os01g60810;LOC_Os02g40900;LOC_Os04g48830;LOC_Os01g65550;LOC_Os03g17760;LOC_Os04g40630;LOC_Os08g42600;LOC_Os08g31030;LOC_Os09g08720;LOC_Os01g43610;LOC_Os07g41060;LOC_Os04g53860;LOC_Os02g51890;LOC_Os01g20780;LOC_Os09g31522;LOC_Os01g66890
GO:0097305	response to alcohol	Biological Process	6	1	0.14104	LOC_Os03g58350;LOC_Os12g40900;LOC_Os04g47250;LOC_Os02g06150;LOC_Os04g45690;LOC_Os11g01620
GO:0009793	embryo development ending in seed dormancy	Biological Process	72	1	0.142863	LOC_Os01g34560;LOC_Os06g50900;LOC_Os01g47690;LOC_Os02g47420;LOC_Os01g64360;LOC_Os03g27370;LOC_Os01g70310;LOC_Os05g38150;LOC_Os01g72330;LOC_Os02g53200;LOC_Os06g07030;LOC_Os04g49980;LOC_Os01g26210;LOC_Os08g43600;LOC_Os02g35180;LOC_Os01g44390;LOC_Os12g04500;LOC_Os05g07090;LOC_Os06g35200;LOC_Os01g10370;LOC_Os10g38000;LOC_Os01g12580;LOC_Os05g38000;LOC_Os05g30820;LOC_Os11g01530;LOC_Os11g42450;LOC_Os04g…
GO:0048645	organ formation	Biological Process	11	1	0.145241	LOC_Os01g53640;LOC_Os05g44030;LOC_Os06g01934;LOC_Os03g62314;LOC_Os10g25550;LOC_Os05g33080;LOC_Os03g24930;LOC_Os01g44110;LOC_Os05g36050;LOC_Os03g47730;LOC_Os05g25540
GO:0051704	multi-organism process	Biological Process	23	1	0.145969	LOC_Os07g36210;LOC_Os04g42620;LOC_Os01g70970;LOC_Os02g53000;LOC_Os04g57630;LOC_Os03g10620;LOC_Os04g54210;LOC_Os01g07300;LOC_Os01g65030;LOC_Os03g15270;LOC_Os07g06860;LOC_Os01g48710;LOC_Os05g48810;LOC_Os09g23300;LOC_Os07g23660;LOC_Os11g06570;LOC_Os07g02200;LOC_Os01g51400;LOC_Os08g01890;LOC_Os01g20780;LOC_Os04g04060;LOC_Os06g46340;LOC_Os01g42200
GO:0000096	sulfur amino acid metabolic process	Biological Process	8	1	0.147129	LOC_Os08g39850;LOC_Os07g42420;LOC_Os01g34560;LOC_Os02g10120;LOC_Os06g01934;LOC_Os06g14810;LOC_Os08g39840;LOC_Os11g42510
GO:0009830	cell wall modification involved in abscission	Biological Process	4	1	0.148916	LOC_Os10g40960;LOC_Os12g26290;LOC_Os01g70930;LOC_Os03g21960
GO:0008272	sulfate transport	Biological Process	4	1	0.148916	LOC_Os03g09940;LOC_Os03g06520;LOC_Os01g55150;LOC_Os02g33560
GO:0015692	lead ion transport	Biological Process	4	1	0.148916	LOC_Os08g43120;LOC_Os07g15370;LOC_Os01g42410;LOC_Os01g08260
GO:0010067	procambium histogenesis	Biological Process	4	1	0.148916	LOC_Os03g56270;LOC_Os03g57950;LOC_Os01g10320;LOC_Os07g04190
GO:0010016	shoot system morphogenesis	Biological Process	17	1	0.150698	LOC_Os06g28480;LOC_Os02g06150;LOC_Os08g14940;LOC_Os08g42690;LOC_Os11g12530;LOC_Os11g42450;LOC_Os03g11600;LOC_Os09g34214;LOC_Os12g43660;LOC_Os11g35450;LOC_Os05g33690;LOC_Os12g36100;LOC_Os01g66740;LOC_Os04g42620;LOC_Os02g17710;LOC_Os10g38800;LOC_Os03g20450
GO:0071702	organic substance transport	Biological Process	20	1	0.150851	LOC_Os03g43670;LOC_Os04g52250;LOC_Os01g20780;LOC_Os04g46830;LOC_Os09g37050;LOC_Os01g42900;LOC_Os09g25070;LOC_Os06g09340;LOC_Os02g36490;LOC_Os07g42510;LOC_Os01g16450;LOC_Os01g74550;LOC_Os09g16950;LOC_Os07g44850;LOC_Os07g37510;LOC_Os09g18230;LOC_Os04g52260;LOC_Os11g02540;LOC_Os11g13670;LOC_Os07g41590
GO:0045597	positive regulation of cell differentiation	Biological Process	3	1	0.151058	LOC_Os01g10320;LOC_Os03g08930;LOC_Os09g29360
GO:0042435	indole-containing compound biosynthetic process	Biological Process	3	1	0.151058	LOC_Os07g02780;LOC_Os06g24180;LOC_Os11g47870
GO:0046856	phosphatidylinositol dephosphorylation	Biological Process	3	1	0.151058	LOC_Os01g08780;LOC_Os01g51890;LOC_Os03g57950
GO:0070483	detection of hypoxia	Biological Process	3	1	0.151058	LOC_Os03g08460;LOC_Os12g07030;LOC_Os08g36920
GO:0034755	iron ion transmembrane transport	Biological Process	3	1	0.151058	LOC_Os09g23300;LOC_Os07g15370;LOC_Os06g36450
GO:0006535	cysteine biosynthetic process from serine	Biological Process	3	1	0.151058	LOC_Os04g08390;LOC_Os01g52260;LOC_Os04g08350
GO:0006461	protein complex assembly	Biological Process	5	1	0.151072	LOC_Os03g11400;LOC_Os07g33350;LOC_Os12g41180;LOC_Os02g56540;LOC_Os01g07360
GO:0006810	transport	Biological Process	34	1	0.151976	LOC_Os05g34010;LOC_Os03g12820;LOC_Os06g45990;LOC_Os09g33830;LOC_Os03g53910;LOC_Os03g02050;LOC_Os04g49560;LOC_Os06g46920;LOC_Os12g12120;LOC_Os12g23280;LOC_Os02g38970;LOC_Os01g05840;LOC_Os04g42130;LOC_Os02g13870;LOC_Os07g40690;LOC_Os03g11110;LOC_Os08g32500;LOC_Os12g12934;LOC_Os06g38950;LOC_Os05g27820;LOC_Os05g05930;LOC_Os02g21090;LOC_Os05g23440;LOC_Os01g12470;LOC_Os05g01810;LOC_Os01g73980;LOC_Os01g…
GO:0048441	petal development	Biological Process	10	1	0.152469	LOC_Os03g11600;LOC_Os11g45740;LOC_Os02g39140;LOC_Os04g55850;LOC_Os04g42950;LOC_Os12g37970;LOC_Os03g20090;LOC_Os12g37690;LOC_Os02g41800;LOC_Os07g48870
GO:0048856	anatomical structure development	Biological Process	62	1	0.153415	LOC_Os01g68740;LOC_Os07g01860;LOC_Os06g22050;LOC_Os06g35970;LOC_Os07g40130;LOC_Os04g51660;LOC_Os06g20310;LOC_Os06g14630;LOC_Os01g20030;LOC_Os03g57950;LOC_Os02g13660;LOC_Os04g50204;LOC_Os01g51890;LOC_Os03g49830;LOC_Os03g12820;LOC_Os01g20830;LOC_Os08g06550;LOC_Os01g08780;LOC_Os09g25690;LOC_Os01g48710;LOC_Os03g12860;LOC_Os03g15460;LOC_Os09g31080;LOC_Os09g10620;LOC_Os06g36810;LOC_Os05g39840;LOC_Os09g…
GO:0008643	carbohydrate transport	Biological Process	9	1	0.153644	LOC_Os12g29220;LOC_Os01g42090;LOC_Os01g65880;LOC_Os02g30910;LOC_Os02g58530;LOC_Os08g42350;LOC_Os03g43720;LOC_Os08g06010;LOC_Os01g12130
GO:0034605	cellular response to heat	Biological Process	8	1	0.153875	LOC_Os03g53340;LOC_Os01g42190;LOC_Os06g35960;LOC_Os02g32520;LOC_Os06g07030;LOC_Os01g10370;LOC_Os02g13800;LOC_Os05g44340
GO:0009835	fruit ripening	Biological Process	2	1	0.155044	LOC_Os05g05670;LOC_Os05g05680
GO:0071918	urea transmembrane transport	Biological Process	2	1	0.155044	LOC_Os01g74450;LOC_Os10g36924
GO:0010400	rhamnogalacturonan I side chain metabolic process	Biological Process	2	1	0.155044	LOC_Os03g62090;LOC_Os07g14850
GO:0010686	tetracyclic triterpenoid biosynthetic process	Biological Process	2	1	0.155044	LOC_Os11g18366;LOC_Os02g04760
GO:0009051	pentose-phosphate shunt, oxidative branch	Biological Process	2	1	0.155044	LOC_Os01g54030;LOC_Os04g19740
GO:0016046	detection of fungus	Biological Process	2	1	0.155044	LOC_Os01g55940;LOC_Os07g40290
GO:0043693	monoterpene biosynthetic process	Biological Process	2	1	0.155044	LOC_Os11g28530;LOC_Os02g36140
GO:0051170	nuclear import	Biological Process	2	1	0.155044	LOC_Os02g33560;LOC_Os01g55150
GO:0006995	cellular response to nitrogen starvation	Biological Process	11	1	0.156189	LOC_Os07g18230;LOC_Os01g08260;LOC_Os01g11160;LOC_Os01g42410;LOC_Os12g06060;LOC_Os07g18240;LOC_Os08g40170;LOC_Os08g43120;LOC_Os07g03870;LOC_Os07g04040;LOC_Os01g10320
GO:0010068	protoderm histogenesis	Biological Process	9	1	0.160006	LOC_Os05g25540;LOC_Os05g36050;LOC_Os03g62314;LOC_Os01g44110;LOC_Os05g44030;LOC_Os03g24930;LOC_Os01g53640;LOC_Os05g33080;LOC_Os10g25550
GO:0043068	positive regulation of programmed cell death	Biological Process	4	1	0.160225	LOC_Os05g41670;LOC_Os09g37050;LOC_Os03g27120;LOC_Os03g38170
GO:0009630	gravitropism	Biological Process	20	1	0.162464	LOC_Os01g06640;LOC_Os09g39410;LOC_Os06g22870;LOC_Os03g58320;LOC_Os01g64360;LOC_Os11g04060;LOC_Os04g28570;LOC_Os12g40890;LOC_Os05g50340;LOC_Os05g49240;LOC_Os02g28074;LOC_Os02g49480;LOC_Os05g50350;LOC_Os01g17214;LOC_Os05g04600;LOC_Os04g33820;LOC_Os03g13540;LOC_Os03g20870;LOC_Os01g44390;LOC_Os12g40900
GO:0019243	methylglyoxal catabolic process to D-lactate	Biological Process	10	1	0.164407	LOC_Os01g47690;LOC_Os01g56560;LOC_Os01g47760;LOC_Os07g44410;LOC_Os09g39910;LOC_Os03g40100;LOC_Os04g32110;LOC_Os01g27140;LOC_Os03g02260;LOC_Os01g45274
GO:0080126	ovary septum development	Biological Process	3	1	0.165526	LOC_Os09g28210;LOC_Os05g42180;LOC_Os02g21090
GO:0009875	pollen-pistil interaction	Biological Process	6	1	0.165963	LOC_Os03g35600;LOC_Os07g35730;LOC_Os05g42210;LOC_Os07g34980;LOC_Os04g34270;LOC_Os08g08140
GO:0071281	cellular response to iron ion	Biological Process	9	1	0.166493	LOC_Os03g11734;LOC_Os03g28300;LOC_Os08g39830;LOC_Os02g18410;LOC_Os01g47400;LOC_Os11g32100;LOC_Os07g29330;LOC_Os09g26980;LOC_Os07g48630
GO:0000082	G1/S transition of mitotic cell cycle	Biological Process	1	1	0.166624	LOC_Os08g42600
GO:0006824	cobalt ion transport	Biological Process	1	1	0.166624	LOC_Os06g36450
GO:0019447	D-cysteine catabolic process	Biological Process	1	1	0.166624	LOC_Os03g05310
GO:0035444	nickel cation transmembrane transport	Biological Process	1	1	0.166624	LOC_Os06g36450
GO:0010597	green leaf volatile biosynthetic process	Biological Process	1	1	0.166624	LOC_Os10g35950
GO:0006212	uracil catabolic process	Biological Process	1	1	0.166624	LOC_Os02g50350
GO:0000733	DNA strand renaturation	Biological Process	1	1	0.166624	LOC_Os12g04980
GO:1901937	beta-caryophyllene biosynthetic process	Biological Process	1	1	0.166624	LOC_Os05g16980
GO:0097054	L-glutamate biosynthetic process	Biological Process	1	1	0.166624	LOC_Os05g48200
GO:0015817	histidine transport	Biological Process	1	1	0.166624	LOC_Os01g12520
GO:0010024	phytochromobilin biosynthetic process	Biological Process	1	1	0.166624	LOC_Os06g40080
GO:0043617	cellular response to sucrose starvation	Biological Process	1	1	0.166624	LOC_Os12g08260
GO:0046487	glyoxylate metabolic process	Biological Process	1	1	0.166624	LOC_Os01g25500
GO:0016337	single organismal cell-cell adhesion	Biological Process	1	1	0.166624	LOC_Os07g49140
GO:0007160	cell-matrix adhesion	Biological Process	1	1	0.166624	LOC_Os06g03580
GO:0035865	cellular response to potassium ion	Biological Process	1	1	0.166624	LOC_Os02g18410
GO:0071901	negative regulation of protein serine/threonine kinase activity	Biological Process	1	1	0.166624	LOC_Os10g39920
GO:1901038	cyanidin 3-O-glucoside metabolic process	Biological Process	1	1	0.166624	LOC_Os11g27370
GO:0050982	detection of mechanical stimulus	Biological Process	1	1	0.166624	LOC_Os02g44770
GO:0009165	nucleotide biosynthetic process	Biological Process	10	1	0.170541	LOC_Os06g01490;LOC_Os03g02260;LOC_Os07g32660;LOC_Os02g10760;LOC_Os05g25260;LOC_Os06g38980;LOC_Os07g02810;LOC_Os06g46500;LOC_Os01g36390;LOC_Os10g36390
GO:0010218	response to far red light	Biological Process	23	1	0.171075	LOC_Os06g04850;LOC_Os06g14810;LOC_Os02g15750;LOC_Os01g11350;LOC_Os05g37470;LOC_Os01g34560;LOC_Os04g28520;LOC_Os03g12860;LOC_Os02g49680;LOC_Os09g27450;LOC_Os02g46680;LOC_Os11g06820;LOC_Os05g04600;LOC_Os01g63770;LOC_Os12g19470;LOC_Os02g41460;LOC_Os12g17600;LOC_Os04g54930;LOC_Os07g05365;LOC_Os06g39960;LOC_Os04g45690;LOC_Os04g02050;LOC_Os06g04870
GO:0044419	interspecies interaction between organisms	Biological Process	4	1	0.171835	LOC_Os06g48300;LOC_Os07g40290;LOC_Os01g19130;LOC_Os01g55940
GO:0042344	indole glucosinolate catabolic process	Biological Process	4	1	0.171835	LOC_Os01g42410;LOC_Os01g08260;LOC_Os02g50340;LOC_Os08g43120
GO:0048437	floral organ development	Biological Process	15	1	0.172502	LOC_Os06g01934;LOC_Os11g36000;LOC_Os10g38110;LOC_Os11g29720;LOC_Os06g28480;LOC_Os01g66490;LOC_Os01g47760;LOC_Os11g01620;LOC_Os03g47730;LOC_Os12g01700;LOC_Os02g17710;LOC_Os08g10080;LOC_Os03g22790;LOC_Os05g33690;LOC_Os03g04680
GO:0006766	vitamin metabolic process	Biological Process	9	1	0.173102	LOC_Os02g15750;LOC_Os06g14810;LOC_Os08g39840;LOC_Os01g06640;LOC_Os02g49480;LOC_Os08g39850;LOC_Os07g42420;LOC_Os01g34560;LOC_Os02g10120
GO:0016579	protein deubiquitination	Biological Process	9	1	0.173102	LOC_Os09g39410;LOC_Os01g09580;LOC_Os11g32100;LOC_Os01g16650;LOC_Os04g28570;LOC_Os01g70310;LOC_Os06g50900;LOC_Os02g02830;LOC_Os06g04850
GO:0010268	brassinosteroid homeostasis	Biological Process	6	1	0.174659	LOC_Os01g43750;LOC_Os01g24780;LOC_Os06g39880;LOC_Os02g06140;LOC_Os01g43740;LOC_Os07g23570
GO:1902138	(-)-secoisolariciresinol biosynthetic process	Biological Process	2	1	0.176417	LOC_Os01g01650;LOC_Os12g16220
GO:1902128	(-)-lariciresinol catabolic process	Biological Process	2	1	0.176417	LOC_Os01g01650;LOC_Os12g16220
GO:0009971	anastral spindle assembly involved in male meiosis	Biological Process	2	1	0.176417	LOC_Os12g36100;LOC_Os11g42800
GO:0034214	protein hexamerization	Biological Process	2	1	0.176417	LOC_Os05g44340;LOC_Os02g32520
GO:1902131	(+)-lariciresinol catabolic process	Biological Process	2	1	0.176417	LOC_Os12g16220;LOC_Os01g01650
GO:1902123	(-)-pinoresinol catabolic process	Biological Process	2	1	0.176417	LOC_Os01g01650;LOC_Os12g16220
GO:1902129	(-)-lariciresinol biosynthetic process	Biological Process	2	1	0.176417	LOC_Os01g01650;LOC_Os12g16220
GO:0009798	axis specification	Biological Process	2	1	0.176417	LOC_Os03g20450;LOC_Os03g02240
GO:0042616	paclitaxel metabolic process	Biological Process	2	1	0.176417	LOC_Os07g33620;LOC_Os07g33440
GO:1902135	(+)-secoisolariciresinol biosynthetic process	Biological Process	2	1	0.176417	LOC_Os12g16220;LOC_Os01g01650
GO:1901183	positive regulation of camalexin biosynthetic process	Biological Process	2	1	0.176417	LOC_Os07g40290;LOC_Os01g55940
GO:0048449	floral organ formation	Biological Process	13	1	0.17648	LOC_Os04g49560;LOC_Os01g32330;LOC_Os07g41320;LOC_Os10g39750;LOC_Os02g53200;LOC_Os04g48070;LOC_Os09g27890;LOC_Os02g53000;LOC_Os01g44090;LOC_Os02g53530;LOC_Os01g39330;LOC_Os07g41310;LOC_Os09g27060
GO:0010014	meristem initiation	Biological Process	23	1	0.17865	LOC_Os07g41320;LOC_Os11g12530;LOC_Os08g32500;LOC_Os08g07890;LOC_Os02g41460;LOC_Os07g04190;LOC_Os03g18120;LOC_Os09g15170;LOC_Os08g45060;LOC_Os08g34380;LOC_Os03g56270;LOC_Os01g66490;LOC_Os09g29490;LOC_Os02g45170;LOC_Os08g41340;LOC_Os02g50330;LOC_Os11g01570;LOC_Os10g42130;LOC_Os01g47400;LOC_Os08g28170;LOC_Os02g50040;LOC_Os06g16300;LOC_Os07g41310
GO:2000034	regulation of seed maturation	Biological Process	3	1	0.18038	LOC_Os11g12530;LOC_Os07g04190;LOC_Os03g56270
GO:0007034	vacuolar transport	Biological Process	3	1	0.18038	LOC_Os03g52650;LOC_Os01g61940;LOC_Os05g02890
GO:0009831	plant-type cell wall modification involved in multidimensional cell growth	Biological Process	5	1	0.180449	LOC_Os06g41700;LOC_Os01g60770;LOC_Os02g44108;LOC_Os05g39990;LOC_Os03g60720
GO:0009965	leaf morphogenesis	Biological Process	40	1	0.182852	LOC_Os04g59370;LOC_Os11g07460;LOC_Os01g52160;LOC_Os03g15050;LOC_Os08g10080;LOC_Os02g42380;LOC_Os04g08280;LOC_Os03g08930;LOC_Os02g53200;LOC_Os10g39750;LOC_Os05g40960;LOC_Os05g25540;LOC_Os01g12660;LOC_Os06g11330;LOC_Os03g24930;LOC_Os01g41200;LOC_Os08g01330;LOC_Os01g39330;LOC_Os05g44030;LOC_Os01g16650;LOC_Os07g06620;LOC_Os02g49480;LOC_Os05g50750;LOC_Os05g36050;LOC_Os12g36890;LOC_Os12g04410;LOC_Os03g…
GO:0071215	cellular response to abscisic acid stimulus	Biological Process	6	1	0.183537	LOC_Os12g29220;LOC_Os05g49420;LOC_Os02g30910;LOC_Os08g38020;LOC_Os08g42350;LOC_Os09g34214
GO:0072593	reactive oxygen species metabolic process	Biological Process	4	1	0.183726	LOC_Os04g48930;LOC_Os01g36240;LOC_Os03g13200;LOC_Os10g02040
GO:0016573	histone acetylation	Biological Process	4	1	0.183726	LOC_Os04g40630;LOC_Os06g04870;LOC_Os06g04850;LOC_Os01g66890
GO:0048827	phyllome development	Biological Process	21	1	0.185627	LOC_Os01g24710;LOC_Os06g28480;LOC_Os08g28710;LOC_Os03g04680;LOC_Os03g56950;LOC_Os08g16260;LOC_Os11g35450;LOC_Os04g39320;LOC_Os11g36000;LOC_Os09g27320;LOC_Os10g38110;LOC_Os01g47760;LOC_Os06g35200;LOC_Os06g46920;LOC_Os09g27060;LOC_Os02g17710;LOC_Os03g57780;LOC_Os11g01620;LOC_Os07g40690;LOC_Os12g01700;LOC_Os02g35970
GO:0015696	ammonium transport	Biological Process	9	1	0.186672	LOC_Os03g54000;LOC_Os04g47300;LOC_Os03g52650;LOC_Os12g06060;LOC_Os01g11160;LOC_Os04g40410;LOC_Os04g51610;LOC_Os08g38400;LOC_Os11g37260
GO:0009653	anatomical structure morphogenesis	Biological Process	71	1	0.188004	LOC_Os06g35200;LOC_Os01g03940;LOC_Os01g26270;LOC_Os12g13910;LOC_Os01g08130;LOC_Os07g15370;LOC_Os03g40670;LOC_Os11g29780;LOC_Os01g73110;LOC_Os08g01950;LOC_Os11g04350;LOC_Os02g51860;LOC_Os09g28640;LOC_Os08g02030;LOC_Os04g34170;LOC_Os09g27450;LOC_Os03g07180;LOC_Os08g37940;LOC_Os12g01360;LOC_Os04g38780;LOC_Os05g47680;LOC_Os09g28280;LOC_Os01g68900;LOC_Os04g49950;LOC_Os05g03440;LOC_Os02g41800;LOC_Os07g…
GO:0010468	regulation of gene expression	Biological Process	27	1	0.189901	LOC_Os05g14590;LOC_Os03g57880;LOC_Os07g41600;LOC_Os01g72510;LOC_Os06g12740;LOC_Os10g39090;LOC_Os02g17710;LOC_Os03g30830;LOC_Os03g21730;LOC_Os01g19480;LOC_Os08g38020;LOC_Os03g28300;LOC_Os01g09640;LOC_Os04g40410;LOC_Os12g43660;LOC_Os06g48500;LOC_Os01g06310;LOC_Os08g42840;LOC_Os05g33690;LOC_Os08g24750;LOC_Os07g48390;LOC_Os11g42450;LOC_Os12g17530;LOC_Os10g32990;LOC_Os03g11400;LOC_Os02g18450;LOC_Os01g…
GO:0009691	cytokinin biosynthetic process	Biological Process	5	1	0.190682	LOC_Os10g33900;LOC_Os12g41090;LOC_Os03g43440;LOC_Os03g01880;LOC_Os08g02070
GO:0043622	cortical microtubule organization	Biological Process	7	1	0.191879	LOC_Os01g55260;LOC_Os02g18410;LOC_Os01g12660;LOC_Os12g41180;LOC_Os07g02780;LOC_Os05g50750;LOC_Os03g50970
GO:0006721	terpenoid metabolic process	Biological Process	3	1	0.195574	LOC_Os02g02930;LOC_Os04g27540;LOC_Os05g43910
GO:0055072	iron ion homeostasis	Biological Process	4	1	0.195875	LOC_Os04g45900;LOC_Os07g15370;LOC_Os03g12790;LOC_Os11g38870
GO:0035725	sodium ion transmembrane transport	Biological Process	4	1	0.195875	LOC_Os01g20160;LOC_Os04g51820;LOC_Os01g34850;LOC_Os04g51830
GO:0080178	5-carbamoylmethyluridine metabolic process	Biological Process	4	1	0.195875	LOC_Os09g31522;LOC_Os09g08720;LOC_Os07g41060;LOC_Os04g53860
GO:0043407	negative regulation of MAP kinase activity	Biological Process	4	1	0.195875	LOC_Os01g08260;LOC_Os01g42410;LOC_Os08g43120;LOC_Os01g12470
GO:0090351	seedling development	Biological Process	4	1	0.195875	LOC_Os04g57630;LOC_Os01g55260;LOC_Os01g12660;LOC_Os05g50750
GO:0048657	anther wall tapetum cell differentiation	Biological Process	4	1	0.195875	LOC_Os02g06150;LOC_Os02g06140;LOC_Os04g57630;LOC_Os08g42840
GO:0052033	pathogen-associated molecular pattern dependent induction by symbiont of host innate immune response	Biological Process	10	1	0.196123	LOC_Os10g25550;LOC_Os01g42190;LOC_Os06g44160;LOC_Os06g50230;LOC_Os03g24930;LOC_Os03g13200;LOC_Os01g36240;LOC_Os10g02040;LOC_Os11g02840;LOC_Os08g35160
GO:1901349	glucosinolate transport	Biological Process	2	1	0.198208	LOC_Os06g15370;LOC_Os05g34010
GO:0045596	negative regulation of cell differentiation	Biological Process	2	1	0.198208	LOC_Os02g33560;LOC_Os01g55150
GO:1902125	(+)-pinoresinol catabolic process	Biological Process	2	1	0.198208	LOC_Os12g16220;LOC_Os01g01650
GO:0080160	selenate transport	Biological Process	2	1	0.198208	LOC_Os03g09940;LOC_Os03g06520
GO:1902132	(+)-lariciresinol biosynthetic process	Biological Process	2	1	0.198208	LOC_Os12g16220;LOC_Os01g01650
GO:0031640	killing of cells of other organism	Biological Process	2	1	0.198208	LOC_Os05g33130;LOC_Os11g37950
GO:0006536	glutamate metabolic process	Biological Process	2	1	0.198208	LOC_Os08g36320;LOC_Os04g37480
GO:0071786	endoplasmic reticulum tubular network organization	Biological Process	2	1	0.198208	LOC_Os01g04640;LOC_Os01g12650
GO:0060211	regulation of nuclear-transcribed mRNA poly(A) tail shortening	Biological Process	2	1	0.198208	LOC_Os06g38980;LOC_Os07g43950
GO:0019395	fatty acid oxidation	Biological Process	2	1	0.198208	LOC_Os06g46680;LOC_Os10g37110
GO:0090449	phloem glucosinolate loading	Biological Process	2	1	0.198208	LOC_Os05g34010;LOC_Os06g15370
GO:0009956	radial pattern formation	Biological Process	5	1	0.201115	LOC_Os02g14490;LOC_Os05g40960;LOC_Os02g04640;LOC_Os06g44310;LOC_Os08g16050
GO:0010099	regulation of photomorphogenesis	Biological Process	5	1	0.201115	LOC_Os10g32900;LOC_Os04g45690;LOC_Os01g11350;LOC_Os02g02830;LOC_Os06g39960
GO:0070647	protein modification by small protein conjugation or removal	Biological Process	10	1	0.202768	LOC_Os04g36600;LOC_Os12g43820;LOC_Os01g50400;LOC_Os03g26870;LOC_Os10g39750;LOC_Os07g42700;LOC_Os04g28520;LOC_Os05g39840;LOC_Os07g02780;LOC_Os09g39910
GO:0006546	glycine catabolic process	Biological Process	10	1	0.202768	LOC_Os01g34560;LOC_Os02g10120;LOC_Os02g49480;LOC_Os08g39850;LOC_Os06g23684;LOC_Os07g42420;LOC_Os01g06640;LOC_Os02g15750;LOC_Os06g14810;LOC_Os08g39840
GO:0009117	nucleotide metabolic process	Biological Process	10	1	0.202768	LOC_Os07g42420;LOC_Os02g49480;LOC_Os08g39850;LOC_Os01g34560;LOC_Os02g10120;LOC_Os06g14810;LOC_Os08g39840;LOC_Os02g15750;LOC_Os01g06640;LOC_Os11g42510
GO:0006862	nucleotide transport	Biological Process	11	1	0.203876	LOC_Os03g54000;LOC_Os04g47300;LOC_Os12g06060;LOC_Os01g11160;LOC_Os04g40410;LOC_Os11g37260;LOC_Os03g52650;LOC_Os01g12470;LOC_Os01g12520;LOC_Os04g51610;LOC_Os08g38400
GO:0014070	response to organic cyclic compound	Biological Process	11	1	0.203876	LOC_Os07g06860;LOC_Os12g12934;LOC_Os09g28280;LOC_Os09g34214;LOC_Os03g58470;LOC_Os03g12820;LOC_Os03g58350;LOC_Os07g44850;LOC_Os11g05690;LOC_Os03g09170;LOC_Os03g55290
GO:0010431	seed maturation	Biological Process	12	1	0.204274	LOC_Os03g21730;LOC_Os06g49100;LOC_Os11g42450;LOC_Os07g07990;LOC_Os10g32990;LOC_Os04g24430;LOC_Os01g47080;LOC_Os12g43660;LOC_Os01g72700;LOC_Os02g58480;LOC_Os03g22120;LOC_Os08g42840
GO:0048468	cell development	Biological Process	23	1	0.206503	LOC_Os01g42200;LOC_Os04g49950;LOC_Os03g40670;LOC_Os07g47400;LOC_Os01g50370;LOC_Os11g01330;LOC_Os07g32680;LOC_Os12g28770;LOC_Os06g07220;LOC_Os01g35330;LOC_Os01g06310;LOC_Os03g14130;LOC_Os04g34170;LOC_Os08g43430;LOC_Os02g40260;LOC_Os01g45700;LOC_Os12g41180;LOC_Os05g46750;LOC_Os01g53640;LOC_Os01g50400;LOC_Os04g38780;LOC_Os07g25810;LOC_Os02g56540
GO:0051568	histone H3-K4 methylation	Biological Process	4	1	0.208262	LOC_Os04g17100;LOC_Os04g47300;LOC_Os01g52160;LOC_Os01g41200
GO:0048610	cellular process involved in reproduction	Biological Process	22	1	0.208835	LOC_Os11g07170;LOC_Os01g72700;LOC_Os07g31500;LOC_Os04g40440;LOC_Os03g26870;LOC_Os10g05750;LOC_Os12g04360;LOC_Os02g17730;LOC_Os06g49100;LOC_Os08g14940;LOC_Os11g42450;LOC_Os03g03570;LOC_Os02g09740;LOC_Os04g42620;LOC_Os03g48710;LOC_Os07g05740;LOC_Os02g56920;LOC_Os07g05190;LOC_Os11g36000;LOC_Os03g21730;LOC_Os04g52780;LOC_Os01g53640
GO:0048869	cellular developmental process	Biological Process	38	1	0.208902	LOC_Os07g14740;LOC_Os01g68900;LOC_Os10g07556;LOC_Os05g32230;LOC_Os07g10910;LOC_Os02g43290;LOC_Os06g18960;LOC_Os04g51030;LOC_Os08g34720;LOC_Os08g39590;LOC_Os08g39240;LOC_Os11g29420;LOC_Os06g43044;LOC_Os05g03440;LOC_Os04g20680;LOC_Os03g58790;LOC_Os09g39410;LOC_Os03g64170;LOC_Os02g49950;LOC_Os01g61570;LOC_Os06g43870;LOC_Os11g44430;LOC_Os07g06570;LOC_Os06g35200;LOC_Os11g35240;LOC_Os01g26270;LOC_Os08g…
GO:0006725	cellular aromatic compound metabolic process	Biological Process	26	1	0.211014	LOC_Os06g02780;LOC_Os07g02200;LOC_Os03g27120;LOC_Os05g45110;LOC_Os03g04250;LOC_Os05g45100;LOC_Os07g46480;LOC_Os11g07170;LOC_Os11g06880;LOC_Os04g52260;LOC_Os07g30610;LOC_Os05g48330;LOC_Os01g58640;LOC_Os07g05190;LOC_Os05g05170;LOC_Os02g17710;LOC_Os07g30620;LOC_Os06g19530;LOC_Os05g45090;LOC_Os04g46990;LOC_Os06g02900;LOC_Os09g30414;LOC_Os09g35600;LOC_Os07g34850;LOC_Os11g36160;LOC_Os03g24560
GO:0018874	benzoate metabolic process	Biological Process	3	1	0.211065	LOC_Os01g55940;LOC_Os09g34214;LOC_Os07g40290
GO:0060968	regulation of gene silencing	Biological Process	3	1	0.211065	LOC_Os01g12660;LOC_Os01g55260;LOC_Os05g50750
GO:0045732	positive regulation of protein catabolic process	Biological Process	3	1	0.211065	LOC_Os01g55260;LOC_Os01g12660;LOC_Os05g50750
GO:0015672	monovalent inorganic cation transport	Biological Process	3	1	0.211065	LOC_Os04g51830;LOC_Os08g42690;LOC_Os07g47100
GO:0071366	cellular response to indolebutyric acid stimulus	Biological Process	3	1	0.211065	LOC_Os01g42410;LOC_Os01g08260;LOC_Os08g43120
GO:0010053	root epidermal cell differentiation	Biological Process	6	1	0.211177	LOC_Os01g68540;LOC_Os01g16650;LOC_Os05g51670;LOC_Os02g02830;LOC_Os12g33070;LOC_Os09g28500
GO:0002252	immune effector process	Biological Process	5	1	0.211736	LOC_Os01g66740;LOC_Os04g33990;LOC_Os03g45450;LOC_Os04g58860;LOC_Os05g46750
GO:2001142	nicotinate transport	Biological Process	1	1	0.215753	LOC_Os03g43720
GO:0048227	plasma membrane to endosome transport	Biological Process	1	1	0.215753	LOC_Os07g16970
GO:0071345	cellular response to cytokine stimulus	Biological Process	1	1	0.215753	LOC_Os06g43860
GO:0050830	defense response to Gram-positive bacterium	Biological Process	1	1	0.215753	LOC_Os08g35760
GO:0010434	bract formation	Biological Process	1	1	0.215753	LOC_Os12g04410
GO:0097185	cellular response to azide	Biological Process	1	1	0.215753	LOC_Os06g23114
GO:0001887	selenium compound metabolic process	Biological Process	1	1	0.215753	LOC_Os04g02050
GO:0010097	specification of stamen identity	Biological Process	1	1	0.215753	LOC_Os12g39220
GO:0008153	para-aminobenzoic acid biosynthetic process	Biological Process	1	1	0.215753	LOC_Os05g15530
GO:0051410	detoxification of nitrogen compound	Biological Process	1	1	0.215753	LOC_Os04g08350
GO:0006680	glucosylceramide catabolic process	Biological Process	1	1	0.215753	LOC_Os08g01940
GO:0006376	mRNA splice site selection	Biological Process	1	1	0.215753	LOC_Os01g21420
GO:0048479	style development	Biological Process	1	1	0.215753	LOC_Os03g11600
GO:0006308	DNA catabolic process	Biological Process	1	1	0.215753	LOC_Os04g55850
GO:0009722	detection of cytokinin stimulus	Biological Process	1	1	0.215753	LOC_Os06g43860
GO:0070291	N-acylethanolamine metabolic process	Biological Process	1	1	0.215753	LOC_Os12g07150
GO:0009865	pollen tube adhesion	Biological Process	1	1	0.215753	LOC_Os04g52440
GO:0045860	positive regulation of protein kinase activity	Biological Process	1	1	0.215753	LOC_Os03g63940
GO:1900409	positive regulation of cellular response to oxidative stress	Biological Process	1	1	0.215753	LOC_Os01g11860
GO:0048730	epidermis morphogenesis	Biological Process	1	1	0.215753	LOC_Os08g44840
GO:1901709	(+)-larreatricin metabolic process	Biological Process	1	1	0.215753	LOC_Os01g58100
GO:0016127	sterol catabolic process	Biological Process	1	1	0.215753	LOC_Os02g56900
GO:0015822	ornithine transport	Biological Process	1	1	0.215753	LOC_Os01g12520
GO:0048024	regulation of mRNA splicing, via spliceosome	Biological Process	1	1	0.215753	LOC_Os01g21420
GO:0051127	positive regulation of actin nucleation	Biological Process	1	1	0.215753	LOC_Os07g49140
GO:0034434	sterol esterification	Biological Process	1	1	0.215753	LOC_Os02g56900
GO:2001143	N-methylnicotinate transport	Biological Process	1	1	0.215753	LOC_Os03g43720
GO:0006617	SRP-dependent cotranslational protein targeting to membrane, signal sequence recognition	Biological Process	1	1	0.215753	LOC_Os05g43390
GO:0080065	4-alpha-methyl-delta7-sterol oxidation	Biological Process	1	1	0.215753	LOC_Os03g01820
GO:0007338	single fertilization	Biological Process	1	1	0.215753	LOC_Os04g51610
GO:0080187	floral organ senescence	Biological Process	1	1	0.215753	LOC_Os04g55850
GO:0042425	choline biosynthetic process	Biological Process	1	1	0.215753	LOC_Os05g47540
GO:1901708	(+)-3'-hydroxylarreatricin biosynthetic process	Biological Process	1	1	0.215753	LOC_Os01g58100
GO:0001778	plasma membrane repair	Biological Process	1	1	0.215753	LOC_Os01g60340
GO:0055088	lipid homeostasis	Biological Process	1	1	0.215753	LOC_Os01g41240
GO:0080058	protein deglutathionylation	Biological Process	1	1	0.215753	LOC_Os01g07376
GO:0050691	regulation of defense response to virus by host	Biological Process	1	1	0.215753	LOC_Os09g25060
GO:0019484	beta-alanine catabolic process	Biological Process	1	1	0.215753	LOC_Os04g52440
GO:0033356	UDP-L-arabinose metabolic process	Biological Process	1	1	0.215753	LOC_Os07g41360
GO:0010270	photosystem II oxygen evolving complex assembly	Biological Process	1	1	0.215753	LOC_Os07g05365
GO:0006817	phosphate ion transport	Biological Process	7	1	0.217158	LOC_Os01g13280;LOC_Os06g40120;LOC_Os02g31030;LOC_Os04g10690;LOC_Os07g47590;LOC_Os04g32320;LOC_Os03g44810
GO:0090408	phloem nitrate loading	Biological Process	2	1	0.220293	LOC_Os05g34010;LOC_Os06g15370
GO:0006521	regulation of cellular amino acid metabolic process	Biological Process	2	1	0.220293	LOC_Os03g40100;LOC_Os04g32110
GO:0009790	embryo development	Biological Process	24	1	0.220479	LOC_Os10g42130;LOC_Os07g31500;LOC_Os05g33690;LOC_Os08g42840;LOC_Os06g49100;LOC_Os02g06150;LOC_Os08g23870;LOC_Os04g49950;LOC_Os06g02040;LOC_Os01g66490;LOC_Os09g37710;LOC_Os10g32990;LOC_Os09g23350;LOC_Os08g38460;LOC_Os06g19550;LOC_Os07g05740;LOC_Os06g19530;LOC_Os08g34580;LOC_Os01g66740;LOC_Os03g20870;LOC_Os05g50550;LOC_Os07g07990;LOC_Os06g21910;LOC_Os06g03580
GO:0010187	negative regulation of seed germination	Biological Process	8	1	0.220643	LOC_Os12g40920;LOC_Os08g43600;LOC_Os03g20650;LOC_Os10g40740;LOC_Os01g06640;LOC_Os01g46250;LOC_Os04g01740;LOC_Os06g39960
GO:0000079	regulation of cyclin-dependent protein serine/threonine kinase activity	Biological Process	6	1	0.220698	LOC_Os10g41430;LOC_Os05g41390;LOC_Os05g42200;LOC_Os08g37390;LOC_Os06g51110;LOC_Os01g59120
GO:0022607	cellular component assembly	Biological Process	4	1	0.220864	LOC_Os05g46750;LOC_Os12g42760;LOC_Os03g39020;LOC_Os01g50370
GO:0008652	cellular amino acid biosynthetic process	Biological Process	9	1	0.222503	LOC_Os08g39850;LOC_Os07g42420;LOC_Os06g24180;LOC_Os02g10120;LOC_Os01g34560;LOC_Os06g01934;LOC_Os08g39840;LOC_Os06g14810;LOC_Os10g40740
GO:0070370	cellular heat acclimation	Biological Process	3	1	0.22681	LOC_Os01g38359;LOC_Os04g28420;LOC_Os01g38229
GO:0045087	innate immune response	Biological Process	34	1	0.227578	LOC_Os05g02310;LOC_Os07g02140;LOC_Os07g37810;LOC_Os03g43670;LOC_Os02g06150;LOC_Os06g01934;LOC_Os07g40300;LOC_Os03g15890;LOC_Os12g38170;LOC_Os03g47730;LOC_Os01g53880;LOC_Os12g38120;LOC_Os05g25350;LOC_Os11g05690;LOC_Os01g74550;LOC_Os06g24180;LOC_Os03g14654;LOC_Os11g36000;LOC_Os02g34970;LOC_Os01g12490;LOC_Os04g43710;LOC_Os09g29360;LOC_Os01g23970;LOC_Os03g57080;LOC_Os11g36160;LOC_Os05g25430;LOC_Os08g…
GO:0043269	regulation of ion transport	Biological Process	8	1	0.228657	LOC_Os12g06060;LOC_Os03g54000;LOC_Os03g52650;LOC_Os04g51610;LOC_Os11g37260;LOC_Os08g38400;LOC_Os01g11160;LOC_Os04g40410
GO:0019684	photosynthesis, light reaction	Biological Process	17	1	0.230321	LOC_Os01g41200;LOC_Os06g45710;LOC_Os01g58022;LOC_Os06g07220;LOC_Os03g01300;LOC_Os08g35760;LOC_Os08g34720;LOC_Os04g55159;LOC_Os07g26630;LOC_Os03g01320;LOC_Os06g43600;LOC_Os03g18960;LOC_Os07g42420;LOC_Os10g40420;LOC_Os03g50960;LOC_Os03g20550;LOC_Os01g46340
GO:1901362	organic cyclic compound biosynthetic process	Biological Process	30	1	0.23344	LOC_Os04g52260;LOC_Os07g48330;LOC_Os09g16950;LOC_Os10g18820;LOC_Os04g52440;LOC_Os03g53910;LOC_Os07g42520;LOC_Os12g43450;LOC_Os01g66740;LOC_Os04g51660;LOC_Os11g44430;LOC_Os02g28220;LOC_Os01g53330;LOC_Os01g53420;LOC_Os12g04080;LOC_Os03g63390;LOC_Os03g15890;LOC_Os01g51400;LOC_Os04g04060;LOC_Os02g43660;LOC_Os01g43270;LOC_Os04g48930;LOC_Os03g21960;LOC_Os01g25484;LOC_Os02g58390;LOC_Os04g28520;LOC_Os07g…
GO:0008283	cell proliferation	Biological Process	21	1	0.233621	LOC_Os05g14590;LOC_Os11g01620;LOC_Os12g01700;LOC_Os09g27060;LOC_Os12g36100;LOC_Os09g37910;LOC_Os01g16650;LOC_Os02g10020;LOC_Os01g36390;LOC_Os07g02780;LOC_Os02g42380;LOC_Os08g37390;LOC_Os03g39020;LOC_Os03g55290;LOC_Os03g05560;LOC_Os03g50970;LOC_Os03g47230;LOC_Os05g39850;LOC_Os04g40940;LOC_Os03g52650;LOC_Os03g41060
GO:0015770	sucrose transport	Biological Process	4	1	0.23366	LOC_Os12g29220;LOC_Os04g37990;LOC_Os08g42350;LOC_Os02g30910
GO:0042753	positive regulation of circadian rhythm	Biological Process	4	1	0.23366	LOC_Os06g39960;LOC_Os09g39410;LOC_Os04g28570;LOC_Os01g11350
GO:0015992	proton transport	Biological Process	4	1	0.23366	LOC_Os03g48310;LOC_Os03g08560;LOC_Os02g55890;LOC_Os02g47320
GO:2000377	regulation of reactive oxygen species metabolic process	Biological Process	4	1	0.23366	LOC_Os03g41060;LOC_Os02g34600;LOC_Os10g41490;LOC_Os03g55290
GO:0031325	positive regulation of cellular metabolic process	Biological Process	4	1	0.23366	LOC_Os01g50400;LOC_Os06g01966;LOC_Os09g25810;LOC_Os09g25770
GO:0048364	root development	Biological Process	53	1	0.236165	LOC_Os03g02610;LOC_Os02g20560;LOC_Os04g29960;LOC_Os05g50800;LOC_Os08g39270;LOC_Os07g10910;LOC_Os01g53640;LOC_Os01g62900;LOC_Os04g51030;LOC_Os01g57420;LOC_Os10g07556;LOC_Os12g01360;LOC_Os01g06310;LOC_Os05g48890;LOC_Os10g05750;LOC_Os03g14130;LOC_Os08g39240;LOC_Os03g44150;LOC_Os09g23300;LOC_Os02g35440;LOC_Os11g01330;LOC_Os02g20540;LOC_Os03g03510;LOC_Os10g06630;LOC_Os05g39850;LOC_Os04g20680;LOC_Os04g…
GO:0006661	phosphatidylinositol biosynthetic process	Biological Process	8	1	0.236772	LOC_Os01g16650;LOC_Os07g42910;LOC_Os07g02120;LOC_Os04g08350;LOC_Os07g02100;LOC_Os02g02830;LOC_Os04g53730;LOC_Os07g02140
GO:0000160	phosphorelay signal transduction system	Biological Process	8	1	0.236772	LOC_Os02g35180;LOC_Os11g04720;LOC_Os04g57720;LOC_Os07g45570;LOC_Os03g28300;LOC_Os01g72330;LOC_Os12g04500;LOC_Os04g36070
GO:0010260	organ senescence	Biological Process	9	1	0.237522	LOC_Os01g70930;LOC_Os01g46400;LOC_Os10g40960;LOC_Os02g17940;LOC_Os03g08460;LOC_Os08g36920;LOC_Os03g44150;LOC_Os07g42510;LOC_Os12g07030
GO:0044248	cellular catabolic process	Biological Process	16	1	0.23819	LOC_Os09g34214;LOC_Os06g19550;LOC_Os03g11910;LOC_Os06g07300;LOC_Os03g04250;LOC_Os05g45090;LOC_Os01g20780;LOC_Os07g32630;LOC_Os07g47590;LOC_Os03g14370;LOC_Os11g05690;LOC_Os01g19480;LOC_Os08g36320;LOC_Os12g35350;LOC_Os07g31960;LOC_Os08g33710
GO:0051510	regulation of unidimensional cell growth	Biological Process	19	1	0.239763	LOC_Os02g02830;LOC_Os03g62314;LOC_Os05g44030;LOC_Os01g53640;LOC_Os01g16650;LOC_Os08g07890;LOC_Os02g45620;LOC_Os01g44110;LOC_Os05g48340;LOC_Os01g60810;LOC_Os08g34380;LOC_Os04g31710;LOC_Os07g37850;LOC_Os03g43670;LOC_Os10g06630;LOC_Os04g40940;LOC_Os05g36050;LOC_Os08g28710;LOC_Os05g25350
GO:0035720	intraciliary anterograde transport	Biological Process	2	1	0.242561	LOC_Os11g42800;LOC_Os12g36100
GO:0000103	sulfate assimilation	Biological Process	2	1	0.242561	LOC_Os04g02050;LOC_Os01g52260
GO:0030042	actin filament depolymerization	Biological Process	2	1	0.242561	LOC_Os03g60580;LOC_Os12g43340
GO:0045037	protein import into chloroplast stroma	Biological Process	3	1	0.242767	LOC_Os10g35030;LOC_Os05g44340;LOC_Os02g32520
GO:0042440	pigment metabolic process	Biological Process	3	1	0.242767	LOC_Os10g39740;LOC_Os02g22020;LOC_Os02g04640
GO:0048462	carpel formation	Biological Process	3	1	0.242767	LOC_Os09g28210;LOC_Os02g21090;LOC_Os05g42180
GO:0007126	meiotic nuclear division	Biological Process	9	1	0.245164	LOC_Os05g25040;LOC_Os05g25430;LOC_Os05g14590;LOC_Os05g39850;LOC_Os09g28370;LOC_Os09g28210;LOC_Os08g28710;LOC_Os04g32110;LOC_Os02g56540
GO:0009072	aromatic amino acid family metabolic process	Biological Process	8	1	0.253289	LOC_Os06g14810;LOC_Os08g39840;LOC_Os02g15750;LOC_Os10g25130;LOC_Os07g42420;LOC_Os08g39850;LOC_Os01g34560;LOC_Os02g10120
GO:0006342	chromatin silencing	Biological Process	19	1	0.254696	LOC_Os10g07290;LOC_Os12g36100;LOC_Os01g41200;LOC_Os05g50490;LOC_Os01g09580;LOC_Os12g41180;LOC_Os09g37910;LOC_Os06g04080;LOC_Os06g22060;LOC_Os07g02780;LOC_Os08g06550;LOC_Os03g51240;LOC_Os02g28074;LOC_Os01g36390;LOC_Os01g52160;LOC_Os09g36280;LOC_Os02g45170;LOC_Os07g35510;LOC_Os02g10490
GO:0006813	potassium ion transport	Biological Process	5	1	0.255827	LOC_Os02g41710;LOC_Os04g51830;LOC_Os01g20160;LOC_Os04g51820;LOC_Os01g34850
GO:0035556	intracellular signal transduction	Biological Process	28	1	0.256326	LOC_Os12g07030;LOC_Os07g42510;LOC_Os12g41180;LOC_Os05g46750;LOC_Os07g44410;LOC_Os11g44430;LOC_Os01g52230;LOC_Os12g04500;LOC_Os08g36920;LOC_Os03g08460;LOC_Os05g02390;LOC_Os11g02540;LOC_Os11g36160;LOC_Os02g35180;LOC_Os01g72330;LOC_Os04g36070;LOC_Os09g25060;LOC_Os06g07030;LOC_Os09g37050;LOC_Os08g35210;LOC_Os06g45580;LOC_Os04g57720;LOC_Os11g04720;LOC_Os03g09170;LOC_Os11g47870;LOC_Os05g10670;LOC_Os04g…
GO:0009718	anthocyanin-containing compound biosynthetic process	Biological Process	11	1	0.256976	LOC_Os03g57780;LOC_Os12g24800;LOC_Os11g27370;LOC_Os01g03914;LOC_Os03g12530;LOC_Os12g43450;LOC_Os01g66490;LOC_Os08g33710;LOC_Os01g09930;LOC_Os01g06640;LOC_Os07g07230
GO:0019438	aromatic compound biosynthetic process	Biological Process	21	1	0.257069	LOC_Os11g44430;LOC_Os06g46920;LOC_Os07g40690;LOC_Os05g11990;LOC_Os12g43450;LOC_Os03g53910;LOC_Os04g52440;LOC_Os09g16950;LOC_Os10g33370;LOC_Os01g42960;LOC_Os08g16260;LOC_Os03g44150;LOC_Os04g28520;LOC_Os03g04130;LOC_Os03g21960;LOC_Os01g53420;LOC_Os03g15890;LOC_Os01g53330;LOC_Os02g56860;LOC_Os04g04060;LOC_Os01g43270
GO:0010584	pollen exine formation	Biological Process	15	1	0.257973	LOC_Os07g40690;LOC_Os01g67360;LOC_Os10g42030;LOC_Os10g07290;LOC_Os06g46920;LOC_Os01g42090;LOC_Os02g06140;LOC_Os03g04680;LOC_Os01g63930;LOC_Os09g27950;LOC_Os06g11660;LOC_Os04g52320;LOC_Os11g38860;LOC_Os02g53200;LOC_Os06g04080
GO:0009267	cellular response to starvation	Biological Process	3	1	0.258897	LOC_Os09g07440;LOC_Os11g05690;LOC_Os04g30040
GO:2000030	regulation of response to red or far red light	Biological Process	3	1	0.258897	LOC_Os10g38360;LOC_Os10g38470;LOC_Os10g38710
GO:0010074	maintenance of meristem identity	Biological Process	4	1	0.259749	LOC_Os06g01934;LOC_Os03g47730;LOC_Os06g39960;LOC_Os01g11350
GO:0048438	floral whorl development	Biological Process	16	1	0.260207	LOC_Os06g11330;LOC_Os03g47730;LOC_Os11g01620;LOC_Os12g01700;LOC_Os02g41460;LOC_Os09g27060;LOC_Os02g17710;LOC_Os03g04680;LOC_Os05g33690;LOC_Os11g36000;LOC_Os06g01934;LOC_Os10g38110;LOC_Os09g27320;LOC_Os03g50970;LOC_Os01g47760;LOC_Os06g28480
GO:0006417	regulation of translation	Biological Process	9	1	0.260692	LOC_Os12g40900;LOC_Os07g06620;LOC_Os06g22870;LOC_Os02g13520;LOC_Os02g56120;LOC_Os03g58350;LOC_Os01g53880;LOC_Os12g40890;LOC_Os05g40960
GO:1901703	protein localization involved in auxin polar transport	Biological Process	1	1	0.261986	LOC_Os12g06270
GO:0010495	long-distance posttranscriptional gene silencing	Biological Process	1	1	0.261986	LOC_Os02g50330
GO:0035337	fatty-acyl-CoA metabolic process	Biological Process	1	1	0.261986	LOC_Os05g07090
GO:0009450	gamma-aminobutyric acid catabolic process	Biological Process	1	1	0.261986	LOC_Os04g52440
GO:0071435	potassium ion export	Biological Process	1	1	0.261986	LOC_Os02g51750
GO:0051446	positive regulation of meiotic cell cycle	Biological Process	1	1	0.261986	LOC_Os02g50630
GO:0002682	regulation of immune system process	Biological Process	1	1	0.261986	LOC_Os09g25070
GO:0060776	simple leaf morphogenesis	Biological Process	1	1	0.261986	LOC_Os01g32770
GO:0080169	cellular response to boron-containing substance deprivation	Biological Process	1	1	0.261986	LOC_Os09g25070
GO:0042351	'de novo' GDP-L-fucose biosynthetic process	Biological Process	1	1	0.261986	LOC_Os06g44260
GO:0007043	cell-cell junction assembly	Biological Process	1	1	0.261986	LOC_Os12g41690
GO:0045339	farnesyl diphosphate catabolic process	Biological Process	1	1	0.261986	LOC_Os05g16980
GO:0034756	regulation of iron ion transport	Biological Process	1	1	0.261986	LOC_Os11g32100
GO:0006723	cuticle hydrocarbon biosynthetic process	Biological Process	1	1	0.261986	LOC_Os06g44300
GO:0006525	arginine metabolic process	Biological Process	1	1	0.261986	LOC_Os04g52440
GO:0035264	multicellular organism growth	Biological Process	1	1	0.261986	LOC_Os03g41390
GO:0006540	glutamate decarboxylation to succinate	Biological Process	1	1	0.261986	LOC_Os04g52440
GO:0006020	inositol metabolic process	Biological Process	1	1	0.261986	LOC_Os04g52440
GO:0015976	carbon utilization	Biological Process	1	1	0.261986	LOC_Os01g45274
GO:0010581	regulation of starch biosynthetic process	Biological Process	1	1	0.261986	LOC_Os03g11550
GO:0046459	short-chain fatty acid metabolic process	Biological Process	1	1	0.261986	LOC_Os05g07090
GO:0010479	stele development	Biological Process	1	1	0.261986	LOC_Os02g45170
GO:0000291	nuclear-transcribed mRNA catabolic process, exonucleolytic	Biological Process	1	1	0.261986	LOC_Os02g28074
GO:0043473	pigmentation	Biological Process	1	1	0.261986	LOC_Os11g27370
GO:0009658	chloroplast organization	Biological Process	17	1	0.26206	LOC_Os09g15670;LOC_Os05g38290;LOC_Os02g22020;LOC_Os05g49730;LOC_Os04g49370;LOC_Os03g02260;LOC_Os09g28880;LOC_Os01g46760;LOC_Os05g46040;LOC_Os10g35030;LOC_Os10g32900;LOC_Os03g16170;LOC_Os06g45710;LOC_Os01g11860;LOC_Os01g40094;LOC_Os01g62760;LOC_Os09g36200
GO:0006007	glucose catabolic process	Biological Process	18	1	0.263591	LOC_Os08g01100;LOC_Os08g34580;LOC_Os01g12650;LOC_Os02g47320;LOC_Os04g52390;LOC_Os05g25430;LOC_Os09g23350;LOC_Os01g04640;LOC_Os04g32920;LOC_Os12g06660;LOC_Os03g16920;LOC_Os02g40900;LOC_Os08g41290;LOC_Os07g41360;LOC_Os05g50750;LOC_Os05g38530;LOC_Os02g54820;LOC_Os10g36650
GO:0010051	xylem and phloem pattern formation	Biological Process	29	1	0.264518	LOC_Os02g43540;LOC_Os11g42800;LOC_Os07g07040;LOC_Os06g39650;LOC_Os09g31230;LOC_Os03g21730;LOC_Os05g13900;LOC_Os02g14760;LOC_Os07g41320;LOC_Os08g34390;LOC_Os02g14490;LOC_Os06g22050;LOC_Os08g34380;LOC_Os08g07890;LOC_Os03g03570;LOC_Os05g40960;LOC_Os01g10320;LOC_Os02g20040;LOC_Os02g45170;LOC_Os02g04640;LOC_Os02g50040;LOC_Os09g31080;LOC_Os07g41310;LOC_Os06g16300;LOC_Os09g25690;LOC_Os01g20830;LOC_Os12g…
GO:0055069	zinc ion homeostasis	Biological Process	2	1	0.264915	LOC_Os01g17214;LOC_Os11g04060
GO:0097306	cellular response to alcohol	Biological Process	2	1	0.264915	LOC_Os11g44430;LOC_Os08g42840
GO:0009819	drought recovery	Biological Process	2	1	0.264915	LOC_Os06g14370;LOC_Os04g43200
GO:0010608	posttranscriptional regulation of gene expression	Biological Process	2	1	0.264915	LOC_Os06g46900;LOC_Os03g15890
GO:0046283	anthocyanin-containing compound metabolic process	Biological Process	2	1	0.264915	LOC_Os03g04240;LOC_Os03g04250
GO:0015691	cadmium ion transport	Biological Process	5	1	0.267186	LOC_Os01g42410;LOC_Os10g20470;LOC_Os01g08260;LOC_Os04g52310;LOC_Os08g43120
GO:0031047	gene silencing by RNA	Biological Process	14	1	0.267379	LOC_Os03g51240;LOC_Os10g07290;LOC_Os08g06550;LOC_Os01g52160;LOC_Os09g36280;LOC_Os03g26870;LOC_Os01g41200;LOC_Os05g50490;LOC_Os12g04980;LOC_Os07g35510;LOC_Os01g08670;LOC_Os02g50330;LOC_Os02g45170;LOC_Os06g04080
GO:0007033	vacuole organization	Biological Process	9	1	0.26857	LOC_Os05g07090;LOC_Os06g33170;LOC_Os09g25860;LOC_Os01g55260;LOC_Os03g08560;LOC_Os05g50750;LOC_Os05g41670;LOC_Os01g61610;LOC_Os01g12660
GO:0009913	epidermal cell differentiation	Biological Process	9	1	0.26857	LOC_Os12g42760;LOC_Os01g50370;LOC_Os02g56540;LOC_Os01g50400;LOC_Os06g29180;LOC_Os03g39020;LOC_Os03g40670;LOC_Os05g46750;LOC_Os12g41180
GO:0044700	single organism signaling	Biological Process	4	1	0.273	LOC_Os03g26870;LOC_Os01g74550;LOC_Os07g06570;LOC_Os03g47730
GO:0071732	cellular response to nitric oxide	Biological Process	4	1	0.273	LOC_Os11g32100;LOC_Os12g26290;LOC_Os03g11734;LOC_Os01g47400
GO:0006333	chromatin assembly or disassembly	Biological Process	10	1	0.273878	LOC_Os03g53550;LOC_Os05g04700;LOC_Os05g03130;LOC_Os09g37910;LOC_Os03g17790;LOC_Os03g11600;LOC_Os02g51750;LOC_Os07g06620;LOC_Os01g46350;LOC_Os03g18110
GO:0006812	cation transport	Biological Process	12	1	0.27453	LOC_Os04g47420;LOC_Os01g12470;LOC_Os02g56860;LOC_Os03g12530;LOC_Os11g01790;LOC_Os10g33370;LOC_Os01g03914;LOC_Os12g12934;LOC_Os03g08560;LOC_Os01g34850;LOC_Os03g48310;LOC_Os12g01770
GO:0035266	meristem growth	Biological Process	3	1	0.27516	LOC_Os01g55260;LOC_Os01g12660;LOC_Os05g50750
GO:0010017	red or far-red light signaling pathway	Biological Process	13	1	0.277389	LOC_Os03g13540;LOC_Os08g31580;LOC_Os03g09170;LOC_Os01g11350;LOC_Os05g49700;LOC_Os10g40740;LOC_Os02g35180;LOC_Os04g28520;LOC_Os02g10760;LOC_Os02g07930;LOC_Os03g56950;LOC_Os06g39960;LOC_Os04g45690
GO:0016567	protein ubiquitination	Biological Process	46	1	0.280019	LOC_Os06g50900;LOC_Os07g48680;LOC_Os02g54830;LOC_Os03g14370;LOC_Os01g70310;LOC_Os01g47050;LOC_Os04g28570;LOC_Os08g32060;LOC_Os08g34550;LOC_Os01g09580;LOC_Os03g44810;LOC_Os06g14370;LOC_Os08g38460;LOC_Os11g36160;LOC_Os08g43600;LOC_Os03g40100;LOC_Os03g16920;LOC_Os03g20870;LOC_Os07g47590;LOC_Os04g43200;LOC_Os11g32100;LOC_Os02g35440;LOC_Os03g11910;LOC_Os02g49950;LOC_Os09g39410;LOC_Os05g38530;LOC_Os01g…
GO:0006006	glucose metabolic process	Biological Process	6	1	0.280436	LOC_Os01g12660;LOC_Os02g54060;LOC_Os07g41060;LOC_Os04g53860;LOC_Os04g38600;LOC_Os01g55260
GO:0032268	regulation of cellular protein metabolic process	Biological Process	4	1	0.286361	LOC_Os03g53340;LOC_Os01g50400;LOC_Os12g41180;LOC_Os06g35960
GO:0006568	tryptophan metabolic process	Biological Process	2	1	0.287266	LOC_Os11g47870;LOC_Os06g24180
GO:0034389	lipid particle organization	Biological Process	2	1	0.287266	LOC_Os04g43200;LOC_Os06g14370
GO:0006904	vesicle docking involved in exocytosis	Biological Process	2	1	0.287266	LOC_Os06g33170;LOC_Os12g06270
GO:0035404	histone-serine phosphorylation	Biological Process	2	1	0.287266	LOC_Os07g02780;LOC_Os01g50400
GO:0009116	nucleoside metabolic process	Biological Process	2	1	0.287266	LOC_Os04g42520;LOC_Os02g40010
GO:0071249	cellular response to nitrate	Biological Process	2	1	0.287266	LOC_Os01g36720;LOC_Os01g50820
GO:0005513	detection of calcium ion	Biological Process	2	1	0.287266	LOC_Os12g41110;LOC_Os01g51420
GO:0048573	photoperiodism, flowering	Biological Process	15	1	0.287486	LOC_Os05g44070;LOC_Os10g02770;LOC_Os01g66890;LOC_Os08g41340;LOC_Os01g64360;LOC_Os06g39960;LOC_Os03g20650;LOC_Os04g02050;LOC_Os03g13570;LOC_Os03g01800;LOC_Os06g40080;LOC_Os01g09640;LOC_Os04g08350;LOC_Os01g64730;LOC_Os08g43600
GO:0009944	polarity specification of adaxial/abaxial axis	Biological Process	20	1	0.291186	LOC_Os02g04640;LOC_Os08g41340;LOC_Os12g04410;LOC_Os09g29490;LOC_Os03g11600;LOC_Os01g10320;LOC_Os05g40960;LOC_Os06g16300;LOC_Os07g41310;LOC_Os08g28170;LOC_Os02g50040;LOC_Os01g47400;LOC_Os07g41320;LOC_Os09g15170;LOC_Os08g32500;LOC_Os02g41460;LOC_Os08g07890;LOC_Os08g34380;LOC_Os02g14490;LOC_Os08g45060
GO:0010076	maintenance of floral meristem identity	Biological Process	3	1	0.291521	LOC_Os10g33900;LOC_Os03g01880;LOC_Os06g11330
GO:0000398	mRNA splicing, via spliceosome	Biological Process	14	1	0.292149	LOC_Os01g65550;LOC_Os03g17760;LOC_Os08g10080;LOC_Os08g01330;LOC_Os06g04090;LOC_Os10g42030;LOC_Os03g43440;LOC_Os02g21090;LOC_Os07g43950;LOC_Os03g21030;LOC_Os02g50330;LOC_Os10g06630;LOC_Os02g44940;LOC_Os07g48390
GO:0051567	histone H3-K9 methylation	Biological Process	20	1	0.296343	LOC_Os01g44090;LOC_Os12g16210;LOC_Os02g42430;LOC_Os02g56540;LOC_Os01g41200;LOC_Os01g09580;LOC_Os01g08150;LOC_Os09g37910;LOC_Os09g27950;LOC_Os06g22060;LOC_Os11g42800;LOC_Os07g02780;LOC_Os01g36390;LOC_Os01g52160;LOC_Os05g39850;LOC_Os03g39020;LOC_Os04g44500;LOC_Os02g53200;LOC_Os02g10490;LOC_Os12g29400
GO:0045088	regulation of innate immune response	Biological Process	12	1	0.301831	LOC_Os05g46750;LOC_Os09g16950;LOC_Os03g53910;LOC_Os04g22120;LOC_Os09g36580;LOC_Os10g05600;LOC_Os08g02990;LOC_Os07g04730;LOC_Os03g14050;LOC_Os01g66510;LOC_Os08g03020;LOC_Os11g44430
GO:0043085	positive regulation of catalytic activity	Biological Process	14	1	0.304787	LOC_Os02g49680;LOC_Os04g02050;LOC_Os05g51630;LOC_Os07g46790;LOC_Os10g38470;LOC_Os10g25030;LOC_Os09g29070;LOC_Os03g38170;LOC_Os01g07376;LOC_Os11g42800;LOC_Os04g44830;LOC_Os10g38360;LOC_Os09g12290;LOC_Os05g47540
GO:1900000	regulation of anthocyanin catabolic process	Biological Process	1	1	0.305496	LOC_Os07g13634
GO:0051208	sequestering of calcium ion	Biological Process	1	1	0.305496	LOC_Os03g61670
GO:0033358	UDP-L-arabinose biosynthetic process	Biological Process	1	1	0.305496	LOC_Os05g51670
GO:0006555	methionine metabolic process	Biological Process	1	1	0.305496	LOC_Os01g18860
GO:0002240	response to molecule of oomycetes origin	Biological Process	1	1	0.305496	LOC_Os08g06280
GO:0016137	glycoside metabolic process	Biological Process	1	1	0.305496	LOC_Os07g30610
GO:0010220	positive regulation of vernalization response	Biological Process	1	1	0.305496	LOC_Os06g11330
GO:0010442	guard cell morphogenesis	Biological Process	1	1	0.305496	LOC_Os04g39610
GO:0071395	cellular response to jasmonic acid stimulus	Biological Process	1	1	0.305496	LOC_Os04g10160
GO:0032365	intracellular lipid transport	Biological Process	1	1	0.305496	LOC_Os01g25500
GO:0035884	arabinan biosynthetic process	Biological Process	1	1	0.305496	LOC_Os08g34020
GO:0045227	capsule polysaccharide biosynthetic process	Biological Process	1	1	0.305496	LOC_Os05g51670
GO:0006564	L-serine biosynthetic process	Biological Process	1	1	0.305496	LOC_Os08g34720
GO:0042446	hormone biosynthetic process	Biological Process	1	1	0.305496	LOC_Os07g48330
GO:0048448	stamen morphogenesis	Biological Process	1	1	0.305496	LOC_Os01g27140
GO:0010248	establishment or maintenance of transmembrane electrochemical gradient	Biological Process	1	1	0.305496	LOC_Os02g55890
GO:0019762	glucosinolate catabolic process	Biological Process	1	1	0.305496	LOC_Os03g62670
GO:0043255	regulation of carbohydrate biosynthetic process	Biological Process	1	1	0.305496	LOC_Os10g40420
GO:0061416	regulation of transcription from RNA polymerase II promoter in response to salt stress	Biological Process	1	1	0.305496	LOC_Os01g19130
GO:0010602	regulation of 1-aminocyclopropane-1-carboxylate metabolic process	Biological Process	1	1	0.305496	LOC_Os08g06280
GO:0005996	monosaccharide metabolic process	Biological Process	1	1	0.305496	LOC_Os03g05280
GO:0019481	L-alanine catabolic process, by transamination	Biological Process	1	1	0.305496	LOC_Os10g25130
GO:0006505	GPI anchor metabolic process	Biological Process	1	1	0.305496	LOC_Os03g08700
GO:1901671	positive regulation of superoxide dismutase activity	Biological Process	1	1	0.305496	LOC_Os02g54060
GO:0048575	short-day photoperiodism, flowering	Biological Process	3	1	0.307945	LOC_Os03g63970;LOC_Os06g30370;LOC_Os11g05470
GO:0051641	cellular localization	Biological Process	3	1	0.307945	LOC_Os01g61330;LOC_Os07g15370;LOC_Os07g05190
GO:0010928	regulation of auxin mediated signaling pathway	Biological Process	2	1	0.309537	LOC_Os02g49480;LOC_Os01g06640
GO:0006108	malate metabolic process	Biological Process	2	1	0.309537	LOC_Os01g54030;LOC_Os04g46560
GO:1900140	regulation of seedling development	Biological Process	2	1	0.309537	LOC_Os02g06140;LOC_Os08g42840
GO:0043266	regulation of potassium ion transport	Biological Process	2	1	0.309537	LOC_Os01g51420;LOC_Os03g03510
GO:2000024	regulation of leaf development	Biological Process	2	1	0.309537	LOC_Os01g12490;LOC_Os05g45240
GO:0016558	protein import into peroxisome matrix	Biological Process	14	1	0.311162	LOC_Os03g04570;LOC_Os05g34010;LOC_Os01g55260;LOC_Os07g48160;LOC_Os01g16650;LOC_Os02g02830;LOC_Os03g42760;LOC_Os05g07090;LOC_Os07g01070;LOC_Os10g02100;LOC_Os03g02390;LOC_Os11g37260;LOC_Os01g12660;LOC_Os06g49220
GO:0006790	sulfur compound metabolic process	Biological Process	6	1	0.311576	LOC_Os03g56950;LOC_Os10g33370;LOC_Os07g37230;LOC_Os09g28210;LOC_Os02g56860;LOC_Os03g47730
GO:0006400	tRNA modification	Biological Process	4	1	0.313334	LOC_Os09g08720;LOC_Os07g41060;LOC_Os04g53860;LOC_Os09g31522
GO:0009638	phototropism	Biological Process	8	1	0.313559	LOC_Os11g05320;LOC_Os06g50230;LOC_Os01g55260;LOC_Os01g42190;LOC_Os08g43490;LOC_Os05g48810;LOC_Os02g35970;LOC_Os08g35160
GO:0016051	carbohydrate biosynthetic process	Biological Process	5	1	0.313578	LOC_Os05g50750;LOC_Os11g37260;LOC_Os04g44850;LOC_Os01g52710;LOC_Os01g12660
GO:0009812	flavonoid metabolic process	Biological Process	5	1	0.313578	LOC_Os09g17560;LOC_Os07g05460;LOC_Os08g19420;LOC_Os05g43940;LOC_Os10g39740
GO:0048868	pollen tube development	Biological Process	10	1	0.319731	LOC_Os03g21960;LOC_Os01g34560;LOC_Os03g44150;LOC_Os10g33370;LOC_Os03g48710;LOC_Os12g04360;LOC_Os02g56860;LOC_Os04g49980;LOC_Os06g14810;LOC_Os01g53640
GO:0009688	abscisic acid biosynthetic process	Biological Process	6	1	0.322083	LOC_Os03g44380;LOC_Os12g42280;LOC_Os12g24800;LOC_Os07g05940;LOC_Os07g46870;LOC_Os01g42190
GO:0048629	trichome patterning	Biological Process	3	1	0.324398	LOC_Os12g33070;LOC_Os07g48870;LOC_Os04g42950
GO:0006878	cellular copper ion homeostasis	Biological Process	3	1	0.324398	LOC_Os04g17100;LOC_Os01g52160;LOC_Os01g41200
GO:0048367	shoot system development	Biological Process	33	1	0.326796	LOC_Os12g10870;LOC_Os07g35480;LOC_Os08g14700;LOC_Os01g53640;LOC_Os02g34970;LOC_Os03g10880;LOC_Os07g40940;LOC_Os07g35560;LOC_Os01g06310;LOC_Os11g02570;LOC_Os10g25550;LOC_Os12g02500;LOC_Os03g58790;LOC_Os07g04730;LOC_Os09g07350;LOC_Os01g08130;LOC_Os07g35520;LOC_Os07g49140;LOC_Os11g36160;LOC_Os03g54910;LOC_Os05g33080;LOC_Os05g13900;LOC_Os04g52440;LOC_Os04g28420;LOC_Os07g07040;LOC_Os07g07230;LOC_Os02g…
GO:0015986	ATP synthesis coupled proton transport	Biological Process	4	1	0.326907	LOC_Os01g12260;LOC_Os04g42520;LOC_Os02g40010;LOC_Os03g52650
GO:0048443	stamen development	Biological Process	21	1	0.327061	LOC_Os04g28280;LOC_Os02g39140;LOC_Os04g55850;LOC_Os05g04600;LOC_Os06g21250;LOC_Os04g54930;LOC_Os03g20450;LOC_Os07g05740;LOC_Os02g35660;LOC_Os01g66740;LOC_Os04g42620;LOC_Os03g11600;LOC_Os10g32990;LOC_Os08g41320;LOC_Os04g40440;LOC_Os01g72700;LOC_Os12g43660;LOC_Os10g38800;LOC_Os02g46680;LOC_Os07g29960;LOC_Os03g45619
GO:0046907	intracellular transport	Biological Process	11	1	0.328935	LOC_Os03g05560;LOC_Os04g28420;LOC_Os04g41350;LOC_Os10g19180;LOC_Os10g40600;LOC_Os06g15370;LOC_Os05g25430;LOC_Os12g07150;LOC_Os12g16210;LOC_Os02g42430;LOC_Os03g60850
GO:0048316	seed development	Biological Process	27	1	0.330321	LOC_Os04g45900;LOC_Os03g11600;LOC_Os04g53860;LOC_Os11g29720;LOC_Os05g33690;LOC_Os03g20650;LOC_Os04g44320;LOC_Os07g06620;LOC_Os02g02460;LOC_Os07g40940;LOC_Os01g64730;LOC_Os07g13634;LOC_Os02g17940;LOC_Os09g08720;LOC_Os09g18230;LOC_Os07g41060;LOC_Os02g52780;LOC_Os09g31522;LOC_Os06g27910;LOC_Os02g02450;LOC_Os06g39960;LOC_Os05g50490;LOC_Os02g14490;LOC_Os03g54910;LOC_Os09g35940;LOC_Os01g44090;LOC_Os06g…
GO:0090344	negative regulation of cell aging	Biological Process	2	1	0.33166	LOC_Os06g30370;LOC_Os11g05470
GO:0009069	serine family amino acid metabolic process	Biological Process	2	1	0.33166	LOC_Os06g01934;LOC_Os11g42510
GO:0080170	hydrogen peroxide transmembrane transport	Biological Process	2	1	0.33166	LOC_Os01g74450;LOC_Os07g26630
GO:0009057	macromolecule catabolic process	Biological Process	2	1	0.33166	LOC_Os10g28050;LOC_Os06g25010
GO:0043161	proteasome-mediated ubiquitin-dependent protein catabolic process	Biological Process	19	1	0.334086	LOC_Os10g38470;LOC_Os04g40940;LOC_Os01g55260;LOC_Os10g06630;LOC_Os02g46680;LOC_Os05g50750;LOC_Os05g36050;LOC_Os05g04600;LOC_Os10g38780;LOC_Os01g16650;LOC_Os01g49720;LOC_Os02g02830;LOC_Os04g52440;LOC_Os05g48340;LOC_Os01g44110;LOC_Os03g03980;LOC_Os04g54930;LOC_Os01g12660;LOC_Os10g38710
GO:0080168	abscisic acid transport	Biological Process	4	1	0.340514	LOC_Os01g42410;LOC_Os10g40600;LOC_Os01g08260;LOC_Os08g43120
GO:0033043	regulation of organelle organization	Biological Process	4	1	0.340514	LOC_Os12g42760;LOC_Os08g42690;LOC_Os12g36100;LOC_Os04g38780
GO:0048232	male gamete generation	Biological Process	3	1	0.340849	LOC_Os05g50750;LOC_Os01g55260;LOC_Os01g12660
GO:0007178	transmembrane receptor protein serine/threonine kinase signaling pathway	Biological Process	3	1	0.340849	LOC_Os04g52780;LOC_Os07g18240;LOC_Os07g18230
GO:0006066	alcohol metabolic process	Biological Process	3	1	0.340849	LOC_Os08g31030;LOC_Os10g33520;LOC_Os07g29960
GO:0006730	one-carbon metabolic process	Biological Process	3	1	0.340849	LOC_Os10g37340;LOC_Os08g36680;LOC_Os01g18860
GO:0007275	multicellular organismal development	Biological Process	45	1	0.342232	LOC_Os03g61670;LOC_Os08g02990;LOC_Os05g39840;LOC_Os06g12280;LOC_Os09g25100;LOC_Os02g32860;LOC_Os12g41090;LOC_Os03g21400;LOC_Os09g10620;LOC_Os08g06550;LOC_Os02g50690;LOC_Os06g14630;LOC_Os04g51660;LOC_Os01g68900;LOC_Os02g33780;LOC_Os07g40130;LOC_Os01g68740;LOC_Os09g37050;LOC_Os04g37770;LOC_Os10g26150;LOC_Os03g52650;LOC_Os01g73110;LOC_Os03g47230;LOC_Os05g20460;LOC_Os05g37700;LOC_Os11g07460;LOC_Os11g…
GO:0009595	detection of biotic stimulus	Biological Process	21	1	0.342715	LOC_Os01g02580;LOC_Os01g02560;LOC_Os11g02540;LOC_Os02g17710;LOC_Os01g02370;LOC_Os01g02400;LOC_Os01g02790;LOC_Os08g43120;LOC_Os01g02570;LOC_Os01g02780;LOC_Os03g55850;LOC_Os08g33660;LOC_Os04g59370;LOC_Os01g08260;LOC_Os01g02600;LOC_Os01g42410;LOC_Os02g06140;LOC_Os04g08280;LOC_Os02g15750;LOC_Os03g52650;LOC_Os03g18960
GO:0071472	cellular response to salt stress	Biological Process	10	1	0.343258	LOC_Os03g09170;LOC_Os08g31580;LOC_Os05g49700;LOC_Os07g37510;LOC_Os07g04040;LOC_Os07g03870;LOC_Os07g18230;LOC_Os07g18240;LOC_Os02g18410;LOC_Os02g10760
GO:0050688	regulation of defense response to virus	Biological Process	1	1	0.346441	LOC_Os01g19130
GO:0016024	CDP-diacylglycerol biosynthetic process	Biological Process	1	1	0.346441	LOC_Os09g25860
GO:1901695	tyramine biosynthetic process	Biological Process	1	1	0.346441	LOC_Os08g04560
GO:0006556	S-adenosylmethionine biosynthetic process	Biological Process	1	1	0.346441	LOC_Os01g18860
GO:1901599	(-)-pinoresinol biosynthetic process	Biological Process	1	1	0.346441	LOC_Os07g44370
GO:0006222	UMP biosynthetic process	Biological Process	1	1	0.346441	LOC_Os02g50350
GO:0042814	monopolar cell growth	Biological Process	1	1	0.346441	LOC_Os12g06270
GO:0080040	positive regulation of cellular response to phosphate starvation	Biological Process	1	1	0.346441	LOC_Os06g40120
GO:0019567	arabinose biosynthetic process	Biological Process	1	1	0.346441	LOC_Os05g51670
GO:0009067	aspartate family amino acid biosynthetic process	Biological Process	1	1	0.346441	LOC_Os03g63330
GO:0046654	tetrahydrofolate biosynthetic process	Biological Process	1	1	0.346441	LOC_Os05g15530
GO:0006516	glycoprotein catabolic process	Biological Process	1	1	0.346441	LOC_Os03g40070
GO:0010201	response to continuous far red light stimulus by the high-irradiance response system	Biological Process	1	1	0.346441	LOC_Os06g01934
GO:2000121	regulation of removal of superoxide radicals	Biological Process	1	1	0.346441	LOC_Os08g06280
GO:0043903	regulation of symbiosis, encompassing mutualism through parasitism	Biological Process	1	1	0.346441	LOC_Os02g47790
GO:0015937	coenzyme A biosynthetic process	Biological Process	1	1	0.346441	LOC_Os02g36550
GO:0015793	glycerol transport	Biological Process	1	1	0.346441	LOC_Os10g36924
GO:0019725	cellular homeostasis	Biological Process	1	1	0.346441	LOC_Os11g05690
GO:0006542	glutamine biosynthetic process	Biological Process	1	1	0.346441	LOC_Os02g50240
GO:0007163	establishment or maintenance of cell polarity	Biological Process	1	1	0.346441	LOC_Os11g38010
GO:0000302	response to reactive oxygen species	Biological Process	5	1	0.34902	LOC_Os11g02540;LOC_Os01g52160;LOC_Os04g17100;LOC_Os01g41200;LOC_Os02g18450
GO:0044723	single-organism carbohydrate metabolic process	Biological Process	25	1	0.35191	LOC_Os08g14940;LOC_Os06g49100;LOC_Os02g17730;LOC_Os02g06150;LOC_Os10g32990;LOC_Os03g58790;LOC_Os01g72700;LOC_Os11g07170;LOC_Os12g43660;LOC_Os12g01770;LOC_Os11g01790;LOC_Os03g04250;LOC_Os08g42840;LOC_Os01g46400;LOC_Os10g38800;LOC_Os02g06090;LOC_Os03g21730;LOC_Os07g07230;LOC_Os04g57630;LOC_Os04g52780;LOC_Os12g36100;LOC_Os03g20450;LOC_Os11g42510;LOC_Os06g38980;LOC_Os02g17710
GO:0071333	cellular response to glucose stimulus	Biological Process	2	1	0.353576	LOC_Os08g38020;LOC_Os06g39960
GO:0006270	DNA replication initiation	Biological Process	7	1	0.35667	LOC_Os01g36390;LOC_Os03g59480;LOC_Os02g10020;LOC_Os05g14590;LOC_Os03g39020;LOC_Os07g02780;LOC_Os05g39850
GO:0030163	protein catabolic process	Biological Process	3	1	0.35727	LOC_Os06g07300;LOC_Os01g61700;LOC_Os03g53910
GO:0080060	integument development	Biological Process	3	1	0.35727	LOC_Os05g40960;LOC_Os01g10320;LOC_Os02g14490
GO:0009306	protein secretion	Biological Process	3	1	0.35727	LOC_Os06g47130;LOC_Os04g01740;LOC_Os01g60340
GO:0010500	transmitting tissue development	Biological Process	3	1	0.35727	LOC_Os09g28210;LOC_Os02g21090;LOC_Os05g42180
GO:0044085	cellular component biogenesis	Biological Process	12	1	0.358325	LOC_Os06g29180;LOC_Os02g28074;LOC_Os08g24790;LOC_Os10g33370;LOC_Os03g28040;LOC_Os08g28710;LOC_Os02g56860;LOC_Os03g05560;LOC_Os11g12530;LOC_Os08g34720;LOC_Os02g21090;LOC_Os01g59870
GO:0010440	stomatal lineage progression	Biological Process	5	1	0.360892	LOC_Os10g41430;LOC_Os10g42030;LOC_Os08g40170;LOC_Os11g32100;LOC_Os04g38780
GO:0010047	fruit dehiscence	Biological Process	5	1	0.360892	LOC_Os10g40740;LOC_Os08g01330;LOC_Os01g19170;LOC_Os06g04090;LOC_Os02g49480
GO:0009846	pollen germination	Biological Process	11	1	0.366403	LOC_Os01g55260;LOC_Os11g42800;LOC_Os12g02980;LOC_Os07g36630;LOC_Os06g33170;LOC_Os12g36890;LOC_Os01g12660;LOC_Os01g02020;LOC_Os11g03230;LOC_Os07g36690;LOC_Os05g50750
GO:0010038	response to metal ion	Biological Process	7	1	0.36641	LOC_Os09g35940;LOC_Os08g31060;LOC_Os11g01040;LOC_Os03g43670;LOC_Os12g23280;LOC_Os06g35970;LOC_Os02g21090
GO:0043687	post-translational protein modification	Biological Process	10	1	0.367056	LOC_Os01g70310;LOC_Os02g50330;LOC_Os06g04850;LOC_Os01g11350;LOC_Os07g43950;LOC_Os06g50900;LOC_Os07g48630;LOC_Os06g39960;LOC_Os08g39830;LOC_Os11g32100
GO:0032870	cellular response to hormone stimulus	Biological Process	3	1	0.373631	LOC_Os08g32060;LOC_Os09g21120;LOC_Os01g55150
GO:0030036	actin cytoskeleton organization	Biological Process	3	1	0.373631	LOC_Os10g36650;LOC_Os11g37260;LOC_Os12g06660
GO:0022603	regulation of anatomical structure morphogenesis	Biological Process	3	1	0.373631	LOC_Os05g45240;LOC_Os01g12490;LOC_Os02g17730
GO:0010541	acropetal auxin transport	Biological Process	3	1	0.373631	LOC_Os05g04600;LOC_Os04g54930;LOC_Os02g46680
GO:0009746	response to hexose	Biological Process	2	1	0.375232	LOC_Os03g41060;LOC_Os02g44770
GO:0044550	secondary metabolite biosynthetic process	Biological Process	2	1	0.375232	LOC_Os03g63390;LOC_Os02g43660
GO:0030010	establishment of cell polarity	Biological Process	2	1	0.375232	LOC_Os09g25060;LOC_Os02g43560
GO:0009961	response to 1-aminocyclopropane-1-carboxylic acid	Biological Process	2	1	0.375232	LOC_Os02g28074;LOC_Os03g05280
GO:0044458	motile cilium assembly	Biological Process	2	1	0.375232	LOC_Os12g36100;LOC_Os11g42800
GO:0006094	gluconeogenesis	Biological Process	23	1	0.375494	LOC_Os04g19740;LOC_Os09g08720;LOC_Os01g54030;LOC_Os12g06660;LOC_Os04g01740;LOC_Os03g02260;LOC_Os09g31522;LOC_Os02g51890;LOC_Os03g17760;LOC_Os04g02050;LOC_Os02g47790;LOC_Os03g60580;LOC_Os06g21250;LOC_Os09g29070;LOC_Os07g46990;LOC_Os03g05310;LOC_Os10g36650;LOC_Os10g06630;LOC_Os05g34170;LOC_Os09g39910;LOC_Os01g65550;LOC_Os03g15050;LOC_Os12g03720
GO:0010359	regulation of anion channel activity	Biological Process	13	1	0.378261	LOC_Os04g39880;LOC_Os07g42924;LOC_Os06g21570;LOC_Os11g07170;LOC_Os11g36160;LOC_Os06g20150;LOC_Os04g47300;LOC_Os08g14940;LOC_Os12g34524;LOC_Os05g41990;LOC_Os04g52780;LOC_Os06g46799;LOC_Os11g43980
GO:0010262	somatic embryogenesis	Biological Process	4	1	0.381361	LOC_Os07g06470;LOC_Os04g41620;LOC_Os03g48970;LOC_Os04g41640
GO:0008299	isoprenoid biosynthetic process	Biological Process	5	1	0.384656	LOC_Os05g50550;LOC_Os03g59040;LOC_Os10g33370;LOC_Os02g56860;LOC_Os04g27540
GO:0009987	cellular process	Biological Process	95	1	0.38468	LOC_Os06g25950;LOC_Os02g07190;LOC_Os09g25700;LOC_Os08g09840;LOC_Os04g58890;LOC_Os01g36660;LOC_Os09g10620;LOC_Os03g24820;LOC_Os04g59330;LOC_Os05g46480;LOC_Os08g08440;LOC_Os08g01940;LOC_Os05g30750;LOC_Os01g43140;LOC_Os11g03230;LOC_Os07g04950;LOC_Os01g63620;LOC_Os03g12790;LOC_Os06g34730;LOC_Os01g16920;LOC_Os07g12100;LOC_Os03g20760;LOC_Os03g10478;LOC_Os01g50090;LOC_Os03g58230;LOC_Os03g20440;LOC_Os10g…
GO:0060359	response to ammonium ion	Biological Process	1	1	0.384974	LOC_Os05g48200
GO:0010321	regulation of vegetative phase change	Biological Process	1	1	0.384974	LOC_Os04g56170
GO:0016119	carotene metabolic process	Biological Process	1	1	0.384974	LOC_Os03g03370
GO:0043988	histone H3-S28 phosphorylation	Biological Process	1	1	0.384974	LOC_Os01g09580
GO:0000289	nuclear-transcribed mRNA poly(A) tail shortening	Biological Process	1	1	0.384974	LOC_Os06g38980
GO:0019305	dTDP-rhamnose biosynthetic process	Biological Process	1	1	0.384974	LOC_Os03g17230
GO:0010618	aerenchyma formation	Biological Process	1	1	0.384974	LOC_Os08g06280
GO:1901607	alpha-amino acid biosynthetic process	Biological Process	1	1	0.384974	LOC_Os11g42510
GO:0009250	glucan biosynthetic process	Biological Process	1	1	0.384974	LOC_Os07g22930
GO:0048658	anther wall tapetum development	Biological Process	1	1	0.384974	LOC_Os04g38600
GO:0043987	histone H3-S10 phosphorylation	Biological Process	1	1	0.384974	LOC_Os01g09580
GO:0010184	cytokinin transport	Biological Process	1	1	0.384974	LOC_Os09g38510
GO:0048571	long-day photoperiodism	Biological Process	1	1	0.384974	LOC_Os04g45690
GO:0006014	D-ribose metabolic process	Biological Process	1	1	0.384974	LOC_Os08g02120
GO:0010430	fatty acid omega-oxidation	Biological Process	1	1	0.384974	LOC_Os08g31030
GO:0010246	rhamnogalacturonan I biosynthetic process	Biological Process	1	1	0.384974	LOC_Os05g51670
GO:0072660	maintenance of protein location in plasma membrane	Biological Process	1	1	0.384974	LOC_Os03g52650
GO:0051156	glucose 6-phosphate metabolic process	Biological Process	1	1	0.384974	LOC_Os01g09460
GO:0006123	mitochondrial electron transport, cytochrome c to oxygen	Biological Process	1	1	0.384974	LOC_Os07g42910
GO:0010564	regulation of cell cycle process	Biological Process	6	1	0.385862	LOC_Os12g07030;LOC_Os03g09170;LOC_Os06g40150;LOC_Os03g50970;LOC_Os01g10320;LOC_Os08g36920
GO:0080113	regulation of seed growth	Biological Process	3	1	0.389909	LOC_Os01g74020;LOC_Os02g04640;LOC_Os05g40960
GO:0015031	protein transport	Biological Process	12	1	0.394438	LOC_Os08g41340;LOC_Os01g19770;LOC_Os07g16970;LOC_Os03g05280;LOC_Os03g16920;LOC_Os05g44070;LOC_Os05g38530;LOC_Os05g43820;LOC_Os12g07150;LOC_Os04g55200;LOC_Os03g19290;LOC_Os04g30800
GO:0019432	triglyceride biosynthetic process	Biological Process	4	1	0.394931	LOC_Os10g41490;LOC_Os02g34600;LOC_Os01g25990;LOC_Os09g33530
GO:0015991	ATP hydrolysis coupled proton transport	Biological Process	4	1	0.394931	LOC_Os01g12260;LOC_Os04g42520;LOC_Os02g40010;LOC_Os02g47320
GO:0032501	multicellular organismal process	Biological Process	17	1	0.395114	LOC_Os05g47680;LOC_Os01g51890;LOC_Os04g50204;LOC_Os12g13910;LOC_Os08g44620;LOC_Os02g15690;LOC_Os05g48580;LOC_Os10g39970;LOC_Os03g03980;LOC_Os06g01760;LOC_Os12g42930;LOC_Os12g36810;LOC_Os06g02960;LOC_Os03g27120;LOC_Os11g10300;LOC_Os03g03350;LOC_Os09g25700
GO:0010189	vitamin E biosynthetic process	Biological Process	2	1	0.396582	LOC_Os06g23684;LOC_Os11g42510
GO:0006418	tRNA aminoacylation for protein translation	Biological Process	2	1	0.396582	LOC_Os09g12290;LOC_Os10g40600
GO:0009968	negative regulation of signal transduction	Biological Process	2	1	0.396582	LOC_Os08g36920;LOC_Os03g28300
GO:0033591	response to L-ascorbic acid	Biological Process	2	1	0.396582	LOC_Os09g37050;LOC_Os04g49700
GO:0032259	methylation	Biological Process	18	1	0.404248	LOC_Os01g67360;LOC_Os02g48770;LOC_Os08g19420;LOC_Os04g57550;LOC_Os09g34320;LOC_Os12g35350;LOC_Os01g20206;LOC_Os06g20790;LOC_Os05g47540;LOC_Os05g01140;LOC_Os02g51860;LOC_Os12g09770;LOC_Os06g13560;LOC_Os05g43940;LOC_Os03g62670;LOC_Os09g17560;LOC_Os11g15040;LOC_Os11g38860
GO:0043248	proteasome assembly	Biological Process	10	1	0.415091	LOC_Os03g03980;LOC_Os02g46680;LOC_Os01g44110;LOC_Os05g48340;LOC_Os05g36050;LOC_Os04g54930;LOC_Os04g40940;LOC_Os01g16650;LOC_Os05g04600;LOC_Os02g02830
GO:0009855	determination of bilateral symmetry	Biological Process	20	1	0.415285	LOC_Os09g29490;LOC_Os02g45170;LOC_Os02g50330;LOC_Os08g41340;LOC_Os03g21030;LOC_Os01g47400;LOC_Os08g28170;LOC_Os02g50040;LOC_Os08g10080;LOC_Os06g16300;LOC_Os07g41310;LOC_Os07g41320;LOC_Os11g42800;LOC_Os08g32500;LOC_Os08g07890;LOC_Os02g41460;LOC_Os09g15170;LOC_Os08g45060;LOC_Os08g34380;LOC_Os08g01330
GO:0009086	methionine biosynthetic process	Biological Process	14	1	0.416584	LOC_Os05g44030;LOC_Os05g12040;LOC_Os05g43820;LOC_Os11g42800;LOC_Os03g20870;LOC_Os09g27950;LOC_Os09g12290;LOC_Os06g46340;LOC_Os03g05280;LOC_Os03g24930;LOC_Os10g25550;LOC_Os11g02840;LOC_Os05g25540;LOC_Os03g01820
GO:0010073	meristem maintenance	Biological Process	14	1	0.416584	LOC_Os08g16050;LOC_Os03g21030;LOC_Os06g44310;LOC_Os06g49100;LOC_Os02g17730;LOC_Os06g28480;LOC_Os08g01330;LOC_Os08g10080;LOC_Os01g66740;LOC_Os11g01620;LOC_Os04g40440;LOC_Os01g04230;LOC_Os12g01700;LOC_Os01g72700
GO:0009650	UV protection	Biological Process	2	1	0.417587	LOC_Os02g02830;LOC_Os01g16650
GO:0033523	histone H2B ubiquitination	Biological Process	2	1	0.417587	LOC_Os02g02830;LOC_Os01g16650
GO:0010629	negative regulation of gene expression	Biological Process	2	1	0.417587	LOC_Os04g36070;LOC_Os12g16220
GO:0010022	meristem determinacy	Biological Process	2	1	0.417587	LOC_Os03g11600;LOC_Os07g06620
GO:0071214	cellular response to abiotic stimulus	Biological Process	5	1	0.420185	LOC_Os11g26570;LOC_Os11g26780;LOC_Os08g34720;LOC_Os11g26790;LOC_Os11g26760
GO:0010023	proanthocyanidin biosynthetic process	Biological Process	5	1	0.420185	LOC_Os01g61610;LOC_Os10g20470;LOC_Os03g08560;LOC_Os03g42830;LOC_Os08g37432
GO:0019288	isopentenyl diphosphate biosynthetic process, methylerythritol 4-phosphate pathway	Biological Process	25	1	0.420421	LOC_Os02g49480;LOC_Os01g34560;LOC_Os06g39712;LOC_Os04g08350;LOC_Os02g49680;LOC_Os03g04240;LOC_Os06g45710;LOC_Os07g42420;LOC_Os02g15750;LOC_Os06g14810;LOC_Os03g05310;LOC_Os11g38860;LOC_Os01g06640;LOC_Os09g29070;LOC_Os06g23684;LOC_Os08g39850;LOC_Os06g14370;LOC_Os04g38850;LOC_Os04g02050;LOC_Os04g43200;LOC_Os01g33160;LOC_Os02g10120;LOC_Os11g05290;LOC_Os08g39840;LOC_Os04g19740
GO:0000771	agglutination involved in conjugation	Biological Process	1	1	0.421235	LOC_Os06g07300
GO:0019676	ammonia assimilation cycle	Biological Process	1	1	0.421235	LOC_Os05g48200
GO:0006656	phosphatidylcholine biosynthetic process	Biological Process	1	1	0.421235	LOC_Os05g47540
GO:0009623	response to parasitic fungus	Biological Process	1	1	0.421235	LOC_Os03g62314
GO:0055075	potassium ion homeostasis	Biological Process	1	1	0.421235	LOC_Os03g03510
GO:0010288	response to lead ion	Biological Process	1	1	0.421235	LOC_Os02g26700
GO:0030834	regulation of actin filament depolymerization	Biological Process	1	1	0.421235	LOC_Os05g43820
GO:0051239	regulation of multicellular organismal process	Biological Process	1	1	0.421235	LOC_Os01g04230
GO:0071836	nectar secretion	Biological Process	1	1	0.421235	LOC_Os04g33740
GO:0010405	arabinogalactan protein metabolic process	Biological Process	1	1	0.421235	LOC_Os07g09670
GO:0051365	cellular response to potassium ion starvation	Biological Process	1	1	0.421235	LOC_Os03g03510
GO:0010104	regulation of ethylene-activated signaling pathway	Biological Process	1	1	0.421235	LOC_Os08g06280
GO:0032876	negative regulation of DNA endoreduplication	Biological Process	1	1	0.421235	LOC_Os02g50630
GO:0006085	acetyl-CoA biosynthetic process	Biological Process	1	1	0.421235	LOC_Os01g02020
GO:0046340	diacylglycerol catabolic process	Biological Process	1	1	0.421235	LOC_Os01g46250
GO:0048572	short-day photoperiodism	Biological Process	1	1	0.421235	LOC_Os04g45690
GO:0009871	jasmonic acid and ethylene-dependent systemic resistance, ethylene mediated signaling pathway	Biological Process	1	1	0.421235	LOC_Os05g33130
GO:0018258	protein O-linked glycosylation via hydroxyproline	Biological Process	1	1	0.421235	LOC_Os07g09670
GO:0009435	NAD biosynthetic process	Biological Process	1	1	0.421235	LOC_Os02g04170
GO:0051245	negative regulation of cellular defense response	Biological Process	1	1	0.421235	LOC_Os03g52650
GO:0052651	monoacylglycerol catabolic process	Biological Process	1	1	0.421235	LOC_Os01g46250
GO:0000919	cell plate assembly	Biological Process	3	1	0.422118	LOC_Os12g06270;LOC_Os07g02780;LOC_Os01g50400
GO:0003006	developmental process involved in reproduction	Biological Process	28	1	0.425406	LOC_Os10g05750;LOC_Os07g40900;LOC_Os04g34170;LOC_Os03g15270;LOC_Os06g38970;LOC_Os05g13940;LOC_Os08g43430;LOC_Os02g58390;LOC_Os11g04350;LOC_Os07g02440;LOC_Os11g31060;LOC_Os07g04730;LOC_Os03g55420;LOC_Os02g15810;LOC_Os04g46110;LOC_Os04g49950;LOC_Os03g03980;LOC_Os12g04150;LOC_Os12g23280;LOC_Os11g36160;LOC_Os04g50204;LOC_Os04g59540;LOC_Os01g42294;LOC_Os12g35350;LOC_Os05g13900;LOC_Os03g07180;LOC_Os02g…
GO:0046394	carboxylic acid biosynthetic process	Biological Process	8	1	0.430656	LOC_Os02g54060;LOC_Os03g56950;LOC_Os11g44430;LOC_Os11g47870;LOC_Os05g02310;LOC_Os07g02140;LOC_Os07g02780;LOC_Os05g46750
GO:0019637	organophosphate metabolic process	Biological Process	5	1	0.431957	LOC_Os02g56860;LOC_Os03g57950;LOC_Os01g51890;LOC_Os03g04250;LOC_Os10g33370
GO:0010380	regulation of chlorophyll biosynthetic process	Biological Process	7	1	0.434737	LOC_Os02g32520;LOC_Os07g39910;LOC_Os01g74020;LOC_Os05g40960;LOC_Os09g38310;LOC_Os05g44340;LOC_Os06g39650
GO:0006487	protein N-linked glycosylation	Biological Process	9	1	0.435274	LOC_Os01g02370;LOC_Os07g29330;LOC_Os09g25860;LOC_Os08g39830;LOC_Os07g48630;LOC_Os01g02580;LOC_Os03g10080;LOC_Os01g02780;LOC_Os07g16970
GO:0010152	pollen maturation	Biological Process	4	1	0.435295	LOC_Os08g07890;LOC_Os01g66740;LOC_Os06g16300;LOC_Os08g34380
GO:0010077	maintenance of inflorescence meristem identity	Biological Process	3	1	0.438006	LOC_Os10g33900;LOC_Os06g11330;LOC_Os03g01880
GO:0006882	cellular zinc ion homeostasis	Biological Process	3	1	0.438006	LOC_Os02g21009;LOC_Os08g36680;LOC_Os04g51610
GO:0008202	steroid metabolic process	Biological Process	2	1	0.438213	LOC_Os04g40590;LOC_Os11g30560
GO:0009567	double fertilization forming a zygote and endosperm	Biological Process	5	1	0.443678	LOC_Os01g06640;LOC_Os10g40740;LOC_Os08g42600;LOC_Os12g04360;LOC_Os03g59770
GO:0033036	macromolecule localization	Biological Process	11	1	0.450048	LOC_Os04g46830;LOC_Os04g52260;LOC_Os01g20780;LOC_Os07g05190;LOC_Os06g27910;LOC_Os04g52250;LOC_Os08g28710;LOC_Os07g15370;LOC_Os06g15370;LOC_Os03g60850;LOC_Os01g70970
GO:0010417	glucuronoxylan biosynthetic process	Biological Process	3	1	0.453725	LOC_Os07g48830;LOC_Os01g52710;LOC_Os04g44850
GO:0051016	barbed-end actin filament capping	Biological Process	3	1	0.453725	LOC_Os10g20710;LOC_Os04g38810;LOC_Os08g17820
GO:0008104	protein localization	Biological Process	3	1	0.453725	LOC_Os07g10910;LOC_Os11g44430;LOC_Os03g11910
GO:0006914	autophagy	Biological Process	5	1	0.455338	LOC_Os05g38530;LOC_Os04g30800;LOC_Os01g74450;LOC_Os03g16920;LOC_Os08g06280
GO:0009088	threonine biosynthetic process	Biological Process	1	1	0.45536	LOC_Os09g12290
GO:0010587	miRNA catabolic process	Biological Process	1	1	0.45536	LOC_Os02g28074
GO:0030397	membrane disassembly	Biological Process	1	1	0.45536	LOC_Os08g39840
GO:0009247	glycolipid biosynthetic process	Biological Process	1	1	0.45536	LOC_Os03g63580
GO:0045927	positive regulation of growth	Biological Process	1	1	0.45536	LOC_Os08g06280
GO:0030030	cell projection organization	Biological Process	1	1	0.45536	LOC_Os03g39020
GO:0033587	shikimate biosynthetic process	Biological Process	1	1	0.45536	LOC_Os10g41480
GO:0009399	nitrogen fixation	Biological Process	1	1	0.45536	LOC_Os02g50240
[truncated: 1,589 more rows]
