# Supplementary material for: OsJAZ1 Attenuates Drought Resistance by Regulating JA and ABA Signaling in Rice
Source: Front Plant Sci. 2017 Dec 11;8:2108. doi: 10.3389/fpls.2017.02108 (PMC5733117; doi:10.3389/fpls.2017.02108)
Supplement: Supplementary file 6 [file Data_Sheet_4.xlsx]

## Sheet: Sheet 1, OE_Special DEGs
Supplementary File 4. Drought-specifically regulated genes (Group II ) in JAZ1-OE. Sheet 1, List of the Group II genes. Sheet 2, GO enrichment of Group II. Sheet 3, KEGG pathway enrichment of Group II.
MSU Locus	JAZ1-OE_D_mean	JAZ1-OE_N_mean	log2FC	FDR	regulated	Annotation
LOC_Os01g03320	8.68493	3.3182	1.38811	0.0220557	up	BBTI2 - Bowman-Birk type bran trypsin inhibitor precursor, expressed
LOC_Os01g03360	2.43041	0.170939	3.82965	0.0277198	up	BBTI5 - Bowman-Birk type bran trypsin inhibitor precursor, expressed
LOC_Os01g03680	4.2502	1.52663	1.47718	0.00178445	up	BBTI8 - Bowman-Birk type bran trypsin inhibitor precursor, expressed
LOC_Os01g03710	2.42454	1.10277	1.13658	0.000243064	up	mannose-6-phosphate isomerase, putative, expressed
LOC_Os01g04670	3.04975	1.1795	1.37051	0.0111312	up	expressed protein
LOC_Os01g05150	6.46374	3.03421	1.09105	0.000158417	up	expressed protein
LOC_Os01g09100	4.05059	1.20616	1.74771	0.00357743	up	WRKY10, expressed
LOC_Os01g09220	3.45031	0.743977	2.21339	9.59e-08	up	transposon protein, putative, CACTA, En/Spm sub-class, expressed
LOC_Os01g09660	3.59762	1.32334	1.44286	0.0110318	up	expressed protein
LOC_Os01g09665	0.946478	0.272166	1.79808	0.00343809	up	expressed protein
LOC_Os01g09870	4.08924	0.503659	3.02131	0.000796624	up	expressed protein
LOC_Os01g18170	15.6758	6.93076	1.17745	3.02e-06	up	Cupin domain containing protein, expressed
LOC_Os01g22352	13.8876	5.52384	1.33005	3.32e-09	up	peroxidase precursor, putative, expressed
LOC_Os01g23990	107.945	38.8761	1.47335	2.18e-11	up	expressed protein
LOC_Os01g28790	45.7118	22.7875	1.00433	0.00937889	up	PRAS-rich protein, putative, expressed
LOC_Os01g36220	34.0118	16.7454	1.02227	2.17e-18	up	bZIP transcription factor domain containing protein, expressed
LOC_Os01g40070	28.0141	12.0798	1.21356	2.15e-05	up	expressed protein
LOC_Os01g41420	2.03936	0.623035	1.71073	0.000914584	up	transmembrane amino acid transporter protein, putative, expressed
LOC_Os01g45470	3472.6	1442.82	1.26713	9.52e-09	up	expressed protein
LOC_Os01g48446	7.72133	3.26556	1.24152	3.32e-05	up	no apical meristem protein, putative, expressed
LOC_Os01g50410	7.49102	0.896341	3.06304	8.53e-17	up	STE_MEKK_ste11_MAP3K.6 - STE kinases include homologs to sterile 7, sterile 11 and sterile 20 from yeast, expressed
LOC_Os01g50420	3.42755	0.222635	3.94442	3.15e-20	up	STE_MEKK_ste11_MAP3K.7 - STE kinases include homologs to sterile 7, sterile 11 and sterile 20 from yeast, expressed
LOC_Os01g52570	6.85721	2.78169	1.30166	0.0105149	up	lachrymatory factor synthase, putative, expressed
LOC_Os01g54890	30.0466	14.3373	1.06743	0.00017035	up	ethylene-responsive transcription factor 2, putative, expressed
LOC_Os01g55100	7.45774	3.43006	1.12051	2.5e-05	up	slTCP3, putative, expressed
LOC_Os01g56380	20.6127	9.23149	1.1589	8.05e-10	up	decarboxylase, putative, expressed
LOC_Os01g57020	7.97484	3.38257	1.23734	0.00223311	up	expressed protein
LOC_Os01g57250	467.744	218.099	1.10074	0.000978595	up	expressed protein
LOC_Os01g57370	1.76604	0.164361	3.42557	1.58e-07	up	cyclic nucleotide-gated ion channel 2, putative, expressed
LOC_Os01g60600	2.78057	0.602908	2.20537	1.96e-08	up	WRKY108, expressed
LOC_Os01g62670	3.93883	1.59049	1.30829	3.64e-05	up	avr9/Cf-9 rapidly elicited protein, putative, expressed
LOC_Os01g64470	23.0168	7.865	1.54917	1.39e-12	up	harpin-induced protein 1 domain containing protein, expressed
LOC_Os01g66440	2.19352	0.792455	1.46884	0.0145632	up	expressed protein
LOC_Os01g67810	4.62861	2.26097	1.03364	0.00054663	up	transposon protein, putative, unclassified, expressed
LOC_Os01g71690	11.5939	4.7321	1.29281	1.13e-05	up	recA protein, expressed
LOC_Os01g72360	4.16125	0.324797	3.6794	1.85e-05	up	expressed protein
LOC_Os01g72530	35.9639	10.4175	1.78754	0.000199922	up	OsCML31 - Calmodulin-related calcium sensor protein, expressed
LOC_Os01g72910	3.50372	1.36485	1.36015	0.029904	up	abscisic stress-ripening, putative, expressed
LOC_Os02g02730	24.7479	9.9696	1.3117	9.01e-12	up	expressed protein
LOC_Os02g04130	6.17952	2.49651	1.30758	0.00229308	up	DUF1645 domain containing protein, putative, expressed
LOC_Os02g06560	52.7231	22.2902	1.24203	1.5e-12	up	wound induced protein, putative, expressed
LOC_Os02g06930	5.51565	2.30893	1.25631	1.23e-10	up	protein kinase, putative, expressed
LOC_Os02g08320	5.01477	1.42436	1.81587	0.000773234	up	haemolysin-III, putative, expressed
LOC_Os02g08440	36.6116	10.6131	1.78646	5.88e-06	up	WRKY71, expressed
LOC_Os02g09970	3.5092	1.42614	1.29902	0.0476796	up	expressed protein
LOC_Os02g09980	8.5432	2.90186	1.5578	0.000645024	up	expressed protein
LOC_Os02g11859	49.5945	22.3556	1.14954	9.39e-05	up	expressed protein
LOC_Os02g12150	4.56848	0.873243	2.38726	0.00177719	up	expressed protein
LOC_Os02g16690	0.635112	0.248361	1.35457	0.0197269	up	expressed protein
LOC_Os02g30610	0.945738	0.126271	2.90491	0.000580483	up	expressed protein
LOC_Os02g33330	143.483	55.5067	1.37015	5.78e-10	up	expressed protein
LOC_Os02g33680	25.1838	5.78465	2.1222	1.86e-19	up	U-box domain containing protein, expressed
LOC_Os02g34640	11.8048	5.98689	0.979495	0.0143233	up	expressed protein
LOC_Os02g35329	16.6048	1.85309	3.1636	1.07e-25	up	RING-H2 finger protein ATL3F, putative, expressed
LOC_Os02g35760	1.17018	0.570974	1.03523	0.0155522	up	STRUBBELIG-RECEPTOR FAMILY 7 precursor, putative, expressed
LOC_Os02g41510	2.35416	0.670091	1.81278	0.00429296	up	MYB family transcription factor, putative, expressed
LOC_Os02g43940	10.4141	4.83938	1.10564	0.0304728	up	AP2 domain containing protein, expressed
LOC_Os02g45420	1.05911	0.119686	3.14553	0.000181987	up	AP2 domain containing protein, expressed
LOC_Os02g46460	11.9412	5.25277	1.1848	1.73e-09	up	peptide transporter PTR2, putative, expressed
LOC_Os02g47470	9.10155	1.9947	2.18994	1.34e-12	up	cytochrome P450, putative, expressed
LOC_Os02g50404	2.33654	0.649386	1.84722	0.0172736	up	expressed protein
LOC_Os02g51040	23.2813	8.73952	1.41355	0.0306679	up	expansin precursor, putative, expressed
LOC_Os02g52010	13.7424	4.45386	1.6255	4.88e-05	up	phosphate-induced protein 1 conserved region domain containing protein, expressed
LOC_Os02g52670	10.7839	2.64288	2.0287	4.69e-08	up	AP2 domain containing protein, expressed
LOC_Os02g55250	11.5353	4.87909	1.24137	4.91e-08	up	BHLH transcription factor, putative, expressed
LOC_Os03g04080	2.96628	0.241883	3.61627	0.000574201	up	expressed protein
LOC_Os03g05210	2.75577	1.17983	1.22388	0.00970212	up	WD domain, G-beta repeat domain containing protein, expressed
LOC_Os03g05440	2.45362	0.672985	1.86626	0.00163193	up	DUF677 domain containing protein, putative, expressed
LOC_Os03g06290	5.47725	2.53368	1.11222	3.68e-08	up	OsSub27 - Putative Subtilisin homologue, expressed
LOC_Os03g08330	75.1753	34.2057	1.13602	8.84e-11	up	ZIM domain containing protein, putative, expressed
LOC_Os03g10310	2.05743	0.815208	1.3356	0.045209	up	expressed protein
LOC_Os03g15340	21.1825	8.26039	1.35859	2.27e-07	up	plastocyanin-like domain containing protein, putative, expressed
LOC_Os03g21000	172.741	81.4077	1.08537	8.99e-33	up	thioredoxin, putative, expressed
LOC_Os03g22960	14.1501	5.8509	1.27408	2.14e-05	up	expressed protein
LOC_Os03g24730	12.5346	5.3382	1.2315	7.82e-15	up	expressed protein
LOC_Os03g25490	0.447206	0.0721815	2.63124	0.000147808	up	cytochrome P450 72A1, putative, expressed
LOC_Os03g30150	3.29587	0.445508	2.88713	0.00224382	up	expressed protein
LOC_Os03g45720	413.986	171.09	1.27483	4.26e-42	up	glyoxalase family protein, putative, expressed
LOC_Os03g51390	13.2465	5.16427	1.35898	0.000126761	up	expressed protein
LOC_Os03g52410	6.31834	2.15641	1.55092	0.0143746	up	expressed protein
LOC_Os03g52910	12.8036	5.22517	1.29299	8.24e-05	up	uncharacterized UPF0114 domain containing protein, expressed
LOC_Os03g53020	63.4924	19.1084	1.73237	2.69e-49	up	helix-loop-helix DNA-binding domain containing protein, expressed
LOC_Os03g55870	32.0284	14.9779	1.09652	1.57e-18	up	membrane associated DUF588 domain containing protein, putative, expressed
LOC_Os03g57720	0.757556	0.24194	1.6467	0.0204341	up	aldehyde oxidase 2, putative, expressed
LOC_Os03g60570	13.0441	0.881081	3.88798	4.21e-23	up	ZOS3-22 - C2H2 zinc finger protein, expressed
LOC_Os03g61470	6.80615	1.71822	1.98593	4.11e-05	up	uncharacterized Cys-rich domain containing protein, putative, expressed
LOC_Os04g10890	0.319489	0.0605137	2.40043	3.82e-06	up	expressed protein
LOC_Os04g12540	5.21785	2.36266	1.14304	1.24e-20	up	receptor-like protein kinase, putative, expressed
LOC_Os04g23550	16.7951	1.48543	3.49909	1.93e-53	up	basic helix-loop-helix family protein, putative, expressed
LOC_Os04g31940	1.7264	0.553536	1.64102	0.00366001	up	dnaJ domain containing protein, expressed
LOC_Os04g40560	11.4699	4.42496	1.37411	0.00501387	up	WD domain, G-beta repeat domain containing protein, expressed
LOC_Os04g41960	102.379	23.4101	2.12871	4.49e-81	up	NADP-dependent oxidoreductase, putative, expressed
LOC_Os04g43519	2.31514	0.621556	1.89714	0.00417301	up	expressed protein
LOC_Os04g46220	10.2553	4.79817	1.09582	7.53e-13	up	ethylene-responsive transcription factor, putative, expressed
LOC_Os04g47170	0.603772	0.266218	1.1814	0.0128718	up	ATROPGEF7/ROPGEF7, putative, expressed
LOC_Os04g48260	4.87495	2.15185	1.17981	6.67e-07	up	zinc RING finger protein, putative, expressed
LOC_Os04g48290	1.1906	0.550446	1.11301	0.000819554	up	MATE efflux family protein, putative, expressed
LOC_Os04g49680	39.7772	17.9667	1.14662	3.92e-16	up	DUF581 domain containing protein, expressed
LOC_Os04g51930	0.329082	0.132467	1.31282	0.000546312	up	retrotransposon protein, putative, LINE subclass, expressed
LOC_Os04g52090	36.7803	14.7844	1.31486	5.78e-11	up	AP2 domain containing protein, expressed
LOC_Os04g52950	34.3007	15.4844	1.14743	2.82e-07	up	nitrate-induced NOI protein, expressed
LOC_Os04g53930	3.88827	1.16934	1.73344	5.9e-06	up	organic cation transporter protein, putative, expressed
LOC_Os04g55520	58.8783	26.6346	1.14443	7.63e-08	up	AP2 domain containing protein, expressed
LOC_Os04g58810	7.58803	2.42857	1.64362	0.00275098	up	CAF1 family ribonuclease containing protein, putative, expressed
LOC_Os05g03760	148.689	69.861	1.08973	4.24e-09	up	zinc finger family protein, putative, expressed
LOC_Os05g05060	126.328	57.7043	1.13042	2.15e-26	up	expressed protein
LOC_Os05g08420	123.529	46.5953	1.4066	9.11e-06	up	expressed protein
LOC_Os05g08750	10.9793	4.88187	1.16928	3.38e-05	up	UDP-glucoronosyl and UDP-glucosyl transferase domain containing protein, expressed
LOC_Os05g11130	3.54658	1.40567	1.33517	7.87e-06	up	cytochrome P450, putative, expressed
LOC_Os05g27010	25.4606	10.8496	1.23063	6.51e-07	up	peptide transporter PTR3-A, putative, expressed
LOC_Os05g36040	0.336391	0.0646289	2.37988	0.0160333	up	retrotransposon protein, putative, unclassified, expressed
LOC_Os05g37250	8.18309	4.15304	0.978478	7.44e-08	up	cytochrome P450, putative, expressed
LOC_Os05g37660	7.01357	3.35374	1.06438	0.000243532	up	transferase family protein, putative, expressed
LOC_Os05g39240	81.6819	35.3899	1.20668	6.64e-10	up	ammonium transporter protein, putative, expressed
LOC_Os05g40010	139.916	65.9591	1.08492	1.15e-23	up	LTPL17 - Protease inhibitor/seed storage/LTP family protein precursor, expressed
LOC_Os05g41780	95.748	45.3744	1.07736	1.34e-07	up	AP2 domain containing protein, expressed
LOC_Os05g42230	4.5366	1.30722	1.79512	0.0143881	up	universal stress protein domain containing protein, putative, expressed
LOC_Os05g43110	0.582569	0.0433321	3.74892	7.56e-05	up	GDSL-like lipase/acylhydrolase, putative, expressed
LOC_Os05g46760	8.89638	2.7893	1.67332	7.63e-05	up	STE_MEKK_ste11_MAP3K.19 - STE kinases include homologs to sterile 7, sterile 11 and sterile 20 from yeast, expressed
LOC_Os05g47960	13.9531	2.58993	2.4296	2.79e-09	up	expressed protein
LOC_Os05g48680	10.5565	4.05847	1.37913	0.0060154	up	expressed protein
LOC_Os06g03930	66.2684	32.7683	1.01602	8.97e-33	up	cytochrome P450 86A1, putative, expressed
LOC_Os06g04230	154.111	29.5388	2.38329	7.88e-06	up	expressed protein
LOC_Os06g04240	25.3452	3.18505	2.99232	1.37e-17	up	expressed protein
LOC_Os06g04480	38.061	18.356	1.05206	2.22e-10	up	expressed protein
LOC_Os06g05410	20.5698	9.12015	1.1734	0.00212458	up	expressed protein
LOC_Os06g05940	13.8434	6.17238	1.1653	7.35e-05	up	DTA2, putative, expressed
LOC_Os06g09310	4.07878	1.99182	1.03405	0.0104828	up	zinc finger, C3HC4 type domain containing protein, expressed
LOC_Os06g23360	1.42685	0.922755	0.628819	0.00436124	up	LTPL70 - Protease inhibitor/seed storage/LTP family protein precursor, expressed
LOC_Os06g28670	2.81333	1.22451	1.20008	0.0174536	up	polygalacturonase, putative, expressed
LOC_Os06g29790	2.14456	0.897357	1.25693	2.4e-06	up	phosphate transporter 1, putative, expressed
LOC_Os06g32650	10.0861	6.97083	0.532962	7.96e-05	up	expressed protein
LOC_Os06g33970	5.24282	1.67522	1.646	0.0032865	up	VQ domain containing protein, putative, expressed
LOC_Os06g40809	7.57428	2.97763	1.34694	0.0377256	up	expressed protein
LOC_Os06g45184	2.17636	0.786984	1.46751	0.000345301	up	retrotransposon protein, putative, Ty3-gypsy subclass, expressed
LOC_Os06g46950	69.6564	28.131	1.3081	5.29e-05	up	EF hand family protein, putative, expressed
LOC_Os06g50400	2.89533	0.518754	2.4806	0.00263553	up	expansin precursor, putative, expressed
LOC_Os07g06460	7.22217	2.70275	1.41801	0.000318011	up	expressed protein
LOC_Os07g07860	4.32879	1.04082	2.05625	0.00757959	up	LTPL76 - Protease inhibitor/seed storage/LTP family protein precursor, expressed
LOC_Os07g08360	4.50649	1.73959	1.37325	0.00749971	up	expressed protein
LOC_Os07g12390	38.8097	15.6615	1.3092	6.99e-07	up	expressed protein
LOC_Os07g23120	368.345	140.078	1.39483	6.94e-53	up	expressed protein
LOC_Os07g32010	25.764	8.80807	1.54846	1.44e-18	up	UDP-glucoronosyl and UDP-glucosyl transferase domain containing protein, expressed
LOC_Os07g39190	3.84187	1.33248	1.52769	0.000528078	up	expressed protein
LOC_Os07g42250	28.5654	13.1562	1.11853	3.27e-15	up	strictosidine synthase, putative, expressed
LOC_Os07g45530	0.253797	0.0871652	1.54185	0.00328798	up	retrotransposon protein, putative, unclassified, expressed
LOC_Os07g45550	0.202824	0.0352751	2.52351	6.66e-05	up	expressed protein
LOC_Os07g49114	36.569	17.1084	1.09591	0.0255112	up	wound-induced protein WI12, putative, expressed
LOC_Os08g07690	17.9736	5.57019	1.69008	3.15e-14	up	expressed protein
LOC_Os08g13710	4.32728	0.392309	3.4634	1.54e-09	up	expressed protein
LOC_Os08g24190	1.1458	0.519619	1.14082	0.0213001	up	OsFBX286 - F-box domain containing protein, expressed
LOC_Os08g25690	5.27215	2.37717	1.14915	0.00615973	up	expressed protein
LOC_Os08g30850	0.228589	0.0737485	1.63207	0.0266164	up	YDG/SRA domain containing protein, expressed
LOC_Os08g31850	2.28276	0.72873	1.64733	0.00300311	up	expressed protein
LOC_Os08g34170	3.32904	1.56288	1.0909	6.3e-05	up	CAF1 family ribonuclease containing protein, putative, expressed
LOC_Os08g37180	1.5391	0.418287	1.87952	0.00336219	up	patatin, putative, expressed
LOC_Os08g37470	2.34957	0.434284	2.43568	0.000909358	up	2-aminoethanethiol dioxygenase, putative, expressed
LOC_Os08g41520	9.29299	4.02895	1.20574	0.00176289	up	zinc finger, C3HC4 type domain containing protein, expressed
LOC_Os08g43290	16.4614	7.41232	1.15109	7.01e-05	up	LTPL44 - Protease inhibitor/seed storage/LTP family protein precursor, expressed
LOC_Os08g44360	52.4274	20.3642	1.36429	0.037212	up	male sterility protein 2, putative, expressed
LOC_Os09g02270	18.168	8.73143	1.05711	2.01e-11	up	cyclase family protein, putative, expressed
LOC_Os09g09944	10.2945	4.79554	1.10211	0.000923378	up	expressed protein
LOC_Os09g21710	15.5923	6.66405	1.22636	0.000186385	up	AN1-like zinc finger domain containing protein, expressed
LOC_Os09g27330	4.14847	0.479355	3.11341	0.00352887	up	oxidoreductase/ transition metal ion binding protein, putative, expressed
LOC_Os09g28440	5.37251	0.410478	3.71022	1.68e-11	up	AP2 domain containing protein, expressed
LOC_Os09g28580	67.2837	28.2444	1.25229	6.01e-12	up	expressed protein
LOC_Os09g28840	1.10187	0.619402	0.831002	0.017107	up	OsSCP43 - Putative Serine Carboxypeptidase homologue, expressed
LOC_Os09g30160	65.9085	30.1524	1.12819	6.65e-12	up	zinc finger, C3HC4 type domain containing protein, expressed
LOC_Os09g34140	64.4717	30.4014	1.08453	2.38e-15	up	expressed protein
LOC_Os09g35010	19.8834	1.25039	3.99111	7.8e-29	up	dehydration-responsive element-binding protein, putative, expressed
LOC_Os09g35030	4.16977	0.796623	2.388	1.22e-06	up	dehydration-responsive element-binding protein, putative, expressed
LOC_Os09g36520	271.649	130.288	1.06004	6.79e-34	up	ki1 protein, putative, expressed
LOC_Os09g36790	8.51739	3.93243	1.11499	1.57e-05	up	expressed protein
LOC_Os09g38910	1.35682	0.669697	1.01865	0.00572633	up	OsWAK92 - OsWAK receptor-like protein kinase, expressed
LOC_Os10g02840	2.10847	0.942215	1.16207	0.0037673	up	O-methyltransferase, putative, expressed
LOC_Os10g25230	5.18528	0.401321	3.69159	2.01e-11	up	ZIM domain containing protein, putative, expressed
LOC_Os10g25290	40.8824	11.4437	1.83692	2e-22	up	ZIM domain containing protein, putative, expressed
LOC_Os10g25400	12.9934	5.9938	1.11624	9.66e-05	up	GDSL-like lipase/acylhydrolase, putative, expressed
LOC_Os10g39870	15.7292	7.463	1.07562	5.8e-05	up	ATG1, putative, expressed
LOC_Os10g41060	29.0412	13.0434	1.15478	1.24e-30	up	expressed protein
LOC_Os11g02300	26.6445	12.3524	1.10904	1.69e-21	up	CPuORF36 - conserved peptide uORF-containing transcript, expressed
LOC_Os11g02610	19.0343	8.68572	1.13189	8.3e-06	up	BTBN20 - Bric-a-Brac, Tramtrack, Broad Complex BTB domain with non-phototropic hypocotyl 3 NPH3 and coiled-coil domains, expressed
LOC_Os11g05494	6.64668	2.29326	1.53523	0.0386626	up	expressed protein
LOC_Os11g06990	2.77588	0.755022	1.87835	0.0030153	up	expressed protein
LOC_Os11g07830	12.8765	5.77965	1.15569	0.0349689	up	dirigent, putative, expressed
LOC_Os11g14140	201.577	86.1075	1.22712	6.7e-14	up	OsFBK25 - F-box domain and kelch repeat containing protein, expressed
LOC_Os11g30500	72.3655	32.6893	1.14649	8.78e-09	up	HVA22, putative, expressed
LOC_Os11g31380	1.58951	0.0541711	4.87492	3.52e-12	up	no apical meristem protein, putative, expressed
LOC_Os12g02200	2.09585	0.968661	1.11347	6.23e-06	up	CAMK_KIN1/SNF1/Nim1_like.6 - CAMK includes calcium/calmodulin depedent protein kinases, expressed
LOC_Os12g03730	1.46537	0.582517	1.33089	1.01e-08	up	zinc finger DHHC domain-containing protein, putative, expressed
LOC_Os12g06190	5.36879	2.98461	0.847056	0.000517919	up	expressed protein
LOC_Os12g17160	0.671549	0.215263	1.64139	0.0281682	up	flavonol sulfotransferase, putative, expressed
LOC_Os12g29330	120.289	49.772	1.2731	1.06e-17	up	no apical meristem protein, putative, expressed
LOC_Os12g32610	25.5257	1.72574	3.88667	8.53e-32	up	expressed protein
LOC_Os12g33300	1.52187	0.757638	1.00627	0.0240354	up	integral membrane protein DUF6 containing protein, expressed
LOC_Os12g42860	48.7059	23.6219	1.04397	5.28e-07	up	2-aminoethanethiol dioxygenase, putative, expressed
LOC_Os12g43490	4.52057	1.64359	1.45965	0.00851208	up	thaumatin, putative, expressed
LOC_Os01g01170	0.0442918	0.325778	-2.87878	0.0142146	down	expressed protein
LOC_Os01g02060	6.48029	12.3874	-0.934742	0.0081635	down	TOO MANY MOUTHS precursor, putative, expressed
LOC_Os01g02740	0.0287066	0.116731	-2.02374	0.000933994	down	retrotransposon protein, putative, unclassified, expressed
LOC_Os01g02750	0.725164	2.09367	-1.52965	1.8e-07	down	protein kinase domain containing protein, expressed
LOC_Os01g04170	0.264979	1.86626	-2.81621	0.02055	down	expressed protein
LOC_Os01g10490	16.5708	60.9442	-1.87885	0.0120435	down	keratin, type I cytoskeletal 9, putative, expressed
LOC_Os01g13520	5.12123	11.5012	-1.16722	2.54e-23	down	auxin response factor 1, putative, expressed
LOC_Os01g13610	0.0899064	2.32655	-4.69363	0.00261495	down	isoflavone reductase homolog IRL, putative, expressed
LOC_Os01g14530	1.17327	2.9736	-1.34168	0.0424859	down	AWPM-19-like membrane family protein, putative, expressed
LOC_Os01g14850	33.4466	177.621	-2.40887	0.000351681	down	MFS18 protein precursor, putative, expressed
LOC_Os01g17330	0.340736	1.82028	-2.41743	0.028223	down	eukaryotic translation initiation factor 6, putative, expressed
LOC_Os01g25688	0.336497	0.483221	-0.522087	0.000856868	down	retrotransposon protein, putative, Ty3-gypsy subclass, expressed
LOC_Os01g27760	0.381725	1.07719	-1.49667	0.0101396	down	expressed protein
LOC_Os01g31800	4.40644	14.6502	-1.73323	0.0405931	down	Core histone H2A/H2B/H3/H4 domain containing protein, putative, expressed
LOC_Os01g33040	0.0900118	0.699019	-2.95715	0.00604644	down	kinesin motor domain containing protein, expressed
LOC_Os01g33080	1.05647	2.56334	-1.27878	1.99e-08	down	fimbrin-like protein 2, putative, expressed
LOC_Os01g33950	0.0497371	0.214506	-2.10863	0.0035407	down	expressed protein
LOC_Os01g41990	0.871205	1.89428	-1.12056	0.0204356	down	OsCML12 - Calmodulin-related calcium sensor protein, expressed
LOC_Os01g42070	0.0576448	0.803483	-3.80101	0.00133073	down	kinesin motor domain containing protein, putative, expressed
LOC_Os01g44360	0.363096	1.15098	-1.66444	0.0064285	down	CBS domain containing membrane protein, putative, expressed
LOC_Os01g47510	0.29308	0.684197	-1.22312	0.00123329	down	retrotransposon protein, putative, unclassified, expressed
LOC_Os01g47580	0.243951	0.830876	-1.76804	0.0234826	down	lipid phosphatase protein, putative, expressed
LOC_Os01g47700	5.34353	26.9917	-2.33665	6.94e-05	down	expressed protein
LOC_Os01g48570	0.247088	0.685047	-1.47118	0.0301582	down	expressed protein
LOC_Os01g49200	0.121421	1.26282	-3.37856	0.0143923	down	microtubule associated protein, putative, expressed
LOC_Os01g52140	0.709516	1.4921	-1.07243	8.36e-05	down	expressed protein
LOC_Os01g53430	0.331798	1.17888	-1.82904	0.00247531	down	anthocyanidin 5,3-O-glucosyltransferase, putative, expressed
LOC_Os01g53840	1.61773	3.64129	-1.17048	0.000648871	down	protein kinase family protein, putative, expressed
LOC_Os01g55160	1.34366	4.60028	-1.77556	0.0304728	down	expressed protein
LOC_Os01g56940	0.22609	0.656343	-1.53755	2.03e-05	down	flap endonuclease, putative, expressed
LOC_Os01g57540	0.261833	0.536265	-1.0343	0.0496402	down	protein kinase, putative, expressed
LOC_Os01g59840	0.273144	0.624125	-1.19218	0.0449806	down	Os1bglu3 - beta-glucosidase homologue, similar to G. max isohydroxyurate hydrolase, expressed
LOC_Os01g61690	0.0980333	0.504029	-2.36216	0.00251133	down	OsSCP5 - Putative Serine Carboxypeptidase homologue, expressed
LOC_Os01g61900	3.36564	7.56081	-1.16766	0.000123047	down	CCT motif family protein, expressed
LOC_Os01g62990	0.148293	0.834606	-2.49265	0.00710599	down	ATROPGEF7/ROPGEF7, putative, expressed
LOC_Os01g64020	0.546537	1.07068	-0.970136	0.0154728	down	transcription factor, putative, expressed
LOC_Os01g64640	12.0629	57.228	-2.24614	0.0323156	down	histone H3, putative, expressed
LOC_Os01g66110	6.33078	13.6209	-1.10537	8.4e-16	down	methyltransferase, putative, expressed
LOC_Os01g68598	1.52471	3.23375	-1.08467	0.00628364	down	expressed protein
LOC_Os01g68730	0.156566	0.715824	-2.19283	0.0271725	down	RNA-binding protein FUS, putative, expressed
LOC_Os01g70560	0.146153	4.99305	-5.09437	0.00129443	down	expressed protein
LOC_Os01g71280	6.68836	15.3535	-1.19884	1.73e-06	down	glycerol-3-phosphate dehydrogenase, putative, expressed
LOC_Os01g71310	4.30615	8.48336	-0.978237	1.3e-12	down	cytokinin dehydrogenase precursor, putative, expressed
LOC_Os01g71820	0.994561	2.7165	-1.44962	0.00928016	down	glycosyl hydrolases family 17, putative, expressed
LOC_Os01g72560	0.559393	1.34624	-1.267	0.00148184	down	expressed protein
LOC_Os01g74146	0.154756	0.946361	-2.6124	0.0015852	down	WD repeat-containing protein, putative, expressed
LOC_Os02g03750	0.737583	1.49659	-1.0208	0.0427353	down	polygalacturonase, putative, expressed
LOC_Os02g05940	0.104211	0.309001	-1.5681	0.00324358	down	phytosulfokine receptor precursor, putative, expressed
LOC_Os02g05970	0.0920312	0.261861	-1.5086	0.0130978	down	phytosulfokine receptor precursor, putative, expressed
LOC_Os02g06340	0.260496	0.891825	-1.7755	0.0476922	down	EH domain-containing protein 1, putative, expressed
LOC_Os02g07110	11.1307	21.0667	-0.92042	2.57e-05	down	OsSAUR6 - Auxin-responsive SAUR gene family member, expressed
LOC_Os02g07370	0.0766365	0.26937	-1.81348	0.0310641	down	retrotransposon protein, putative, unclassified, expressed
LOC_Os02g07870	2.97333	6.16477	-1.05197	3.28e-05	down	ATP synthase, putative, expressed
LOC_Os02g08220	0.828685	1.98057	-1.25702	0.00537894	down	expressed protein
LOC_Os02g15820	0.9542	1.93886	-1.02284	0.0117661	down	extra-large G-protein-related, putative, expressed
LOC_Os02g16500	133.653	311.755	-1.22192	0.0270368	down	expressed protein
LOC_Os02g16940	0.0556244	0.646951	-3.53987	0.00252164	down	OsSub13 - Putative Subtilisin homologue, expressed
LOC_Os02g21340	11.8791	23.6832	-0.995445	6.65e-21	down	ABC-2 type transporter family protein, expressed
LOC_Os02g22570	0.0642655	0.167152	-1.37905	0.039266	down	retrotransposon protein, putative, unclassified, expressed
LOC_Os02g24598	1.04932	2.44113	-1.2181	0.00990357	down	chloroplast envelope membrane protein, putative, expressed
LOC_Os02g24700	1.09671	3.75381	-1.77518	0.000254735	down	OsSAUR8 - Auxin-responsive SAUR gene family member, expressed
LOC_Os02g26480	0.172944	0.640895	-1.88978	0.0191255	down	OsSCP7 - Putative Serine Carboxypeptidase homologue, expressed
LOC_Os02g29640	0.133604	0.327483	-1.29345	0.0137358	down	transposon protein, putative, unclassified, expressed
LOC_Os02g30800	0.203657	0.447076	-1.13438	0.000712773	down	POLE1 - Putative DNA polymerase epsilon catalytic subunit, expressed
LOC_Os02g42560	0.183829	1.87549	-3.35084	0.00395401	down	expressed protein
LOC_Os02g45940	3.82231	41.7717	-3.45001	0.00217508	down	Core histone H2A/H2B/H3/H4 domain containing protein, putative, expressed
LOC_Os02g47920	0.110338	1.07787	-3.28819	0.00104737	down	ZOS2-16 - C2H2 zinc finger protein, expressed
LOC_Os02g49555	0.198842	0.443072	-1.15592	0.0317826	down	expressed protein
LOC_Os02g50910	0.251856	1.30462	-2.37296	0.00459571	down	expressed protein
LOC_Os02g51720	2.79931	6.72833	-1.26518	8.03e-08	down	expressed protein
LOC_Os02g51910	0.121608	0.639927	-2.39567	5.96e-05	down	cytokinin-O-glucosyltransferase 2, putative, expressed
LOC_Os02g52040	2.43938	12.9238	-2.40545	0.000969769	down	phosphate-induced protein 1 conserved region domain containing protein, expressed
LOC_Os02g54280	0.648096	1.76344	-1.44411	0.0497504	down	retrotransposon protein, putative, unclassified, expressed
LOC_Os02g55190	0.14882	1.20444	-3.01672	0.0206403	down	expressed protein
LOC_Os02g55410	0.245697	1.18834	-2.274	0.00356541	down	MCM5 - Putative minichromosome maintenance MCM complex subunit 5, expressed
LOC_Os02g56510	1.17774	2.4336	-1.04707	2.93e-07	down	phosphate transporter 1, putative, expressed
LOC_Os02g57140	0.663981	1.88086	-1.50218	8.99e-05	down	expressed protein
LOC_Os03g01530	9.46672	19.0686	-1.01026	0.0244816	down	tubulin/FtsZ domain containing protein, putative, expressed
LOC_Os03g02290	0.0980004	0.685295	-2.80587	0.0279343	down	kinesin motor domain containing protein, putative, expressed
LOC_Os03g04530	1.5792	7.10412	-2.16946	0.0378772	down	cytochrome P450, putative, expressed
LOC_Os03g04550	0.411695	3.83977	-3.22137	0.000177093	down	expressed protein
LOC_Os03g04720	0.205738	0.67987	-1.72445	1.68e-05	down	retrotransposon protein, putative, unclassified, expressed
LOC_Os03g05250	0.445375	0.862939	-0.954236	0.045542	down	expressed protein
LOC_Os03g06430	0.178099	1.4298	-3.00505	0.00129318	down	expressed protein
LOC_Os03g06670	2.54255	19.6836	-2.95265	0.000636449	down	Core histone H2A/H2B/H3/H4 domain containing protein, putative, expressed
LOC_Os03g10260	0.556109	1.69779	-1.61022	0.0487023	down	expressed protein
LOC_Os03g11540	0.297901	2.40228	-3.0115	0.00147543	down	RPA1B - Putative single-stranded DNA binding complex subunit 1, expressed
LOC_Os03g12140	0.24178	3.01085	-3.63841	2.13e-05	down	glucan endo-1,3-beta-glucosidase precursor, putative, expressed
LOC_Os03g12290	5.88001	17.5615	-1.57853	0.00337462	down	glutamine synthetase, catalytic domain containing protein, expressed
LOC_Os03g14140	0.5602	4.47265	-2.99712	0.000988153	down	POEI16 - Pollen Ole e I allergen and extensin family protein precursor, expressed
LOC_Os03g15790	1.23076	5.1237	-2.05764	0.00673689	down	ZOS3-08 - C2H2 zinc finger protein, expressed
LOC_Os03g18070	19.4367	49.3566	-1.34446	4.19e-21	down	omega-3 fatty acid desaturase, chloroplast precursor, putative, expressed
LOC_Os03g18630	0.0506373	0.632794	-3.64346	0.0127991	down	receptor-like kinase RHG1, putative, expressed
LOC_Os03g18640	0.245072	0.93609	-1.93344	0.0222576	down	laccase precursor protein, putative, expressed
LOC_Os03g19080	0.34554	1.16844	-1.75765	0.0401218	down	expressed protein
LOC_Os03g19200	1.58514	4.05329	-1.35448	0.0016121	down	DNAJ heat shock N-terminal domain-containing protein, putative, expressed
LOC_Os03g19420	0.524334	5.69309	-3.44065	7.23e-06	down	nicotianamine synthase, putative, expressed
LOC_Os03g19427	1.11513	12.2468	-3.45711	0.000129378	down	nicotianamine synthase, putative, expressed
LOC_Os03g19600	0.054277	0.706559	-3.7024	0.000420543	down	retrotransposon protein, putative, unclassified, expressed
LOC_Os03g21820	1.17892	2.99328	-1.34426	0.0138501	down	expansin precursor, putative, expressed
LOC_Os03g32460	0.0523349	0.136226	-1.38015	0.0356158	down	retrotransposon, putative, centromere-specific, expressed
LOC_Os03g38250	0.12634	0.296284	-1.22967	0.00803516	down	disease resistance RPP13-like protein 1, putative, expressed
LOC_Os03g42630	2.11979	4.33722	-1.03285	0.00453299	down	No apical meristem protein, putative, expressed
LOC_Os03g45760	0.375965	1.50318	-1.99934	0.0274811	down	expressed protein
LOC_Os03g47620	0.191477	0.511058	-1.41632	0.0186796	down	ankyrin, putative, expressed
LOC_Os03g49050	0.153256	1.21571	-2.98778	0.00245312	down	possible lysine decarboxylase domain containing protein, expressed
LOC_Os03g51530	0.375679	2.62815	-2.80648	0.0341171	down	expressed protein
LOC_Os03g51910	0.971721	2.1422	-1.14048	7.58e-06	down	basic helix-loop-helix protein, putative, expressed
LOC_Os03g52460	17.7676	36.744	-1.04826	9.14e-28	down	glucose-1-phosphate adenylyltransferase large subunit, putative, expressed
LOC_Os03g55830	1.05469	2.75758	-1.38659	1.35e-07	down	BTBN10 - Bric-a-Brac, Tramtrack, Broad Complex BTB domain with non-phototropic hypocotyl 3 NPH3 and coiled-coil domains, expressed
LOC_Os03g64340	0.373184	1.53298	-2.03838	3.95e-06	down	heavy metal-associated domain containing protein, expressed
LOC_Os04g01470	0.180513	0.780844	-2.11293	0.0227228	down	O-methyltransferase, putative, expressed
LOC_Os04g06900	0.372464	0.975184	-1.38858	0.00161059	down	expressed protein
LOC_Os04g07150	0.063486	0.181064	-1.51199	0.0428643	down	AGAP002737-PA, putative, expressed
LOC_Os04g07920	0.54954	1.08079	-0.975791	0.0373308	down	expressed protein
LOC_Os04g15800	0.260423	1.1801	-2.17999	0.0295542	down	expressed protein
LOC_Os04g16740	3.55928	7.58331	-1.09124	1.97e-12	down	ATP synthase subunit alpha, putative, expressed
LOC_Os04g17650	0.158982	0.487028	-1.61514	0.00126528	down	sucrose synthase, putative, expressed
LOC_Os04g24620	0.150733	0.446097	-1.56537	0.00338893	down	retrotransposon protein, putative, Ty3-gypsy subclass, expressed
LOC_Os04g28260	0.344005	0.824406	-1.26092	0.0373477	down	Kinesin motor domain domain containing protein, expressed
LOC_Os04g30720	0.109341	0.543678	-2.31392	0.000531287	down	kinesin motor domain containing protein, putative, expressed
LOC_Os04g34240	0.200255	3.89455	-4.28155	0.00111674	down	histone H3, putative, expressed
LOC_Os04g38530	0.61312	1.30017	-1.08446	0.0230369	down	aldose 1-epimerase, putative, expressed
LOC_Os04g39110	21.7023	63.0731	-1.53918	0.0178612	down	GASR4 - Gibberellin-regulated GASA/GAST/Snakin family protein precursor, expressed
LOC_Os04g39670	0.107035	0.891513	-3.05818	0.0195582	down	expressed protein
LOC_Os04g42860	3.39894	9.09175	-1.41947	0.0463016	down	GDSL-like lipase/acylhydrolase, putative, expressed
LOC_Os04g47810	0.0936477	0.446288	-2.25266	0.0444944	down	ethylene-responsive protein related, putative, expressed
LOC_Os04g48760	0.107632	0.681463	-2.66253	0.02064	down	leucine-rich repeat family protein, putative, expressed
LOC_Os04g49130	0.842427	1.82253	-1.11332	0.0305568	down	ubiquitin-conjugating enzyme, putative, expressed
LOC_Os04g49210	2.54924	13.6484	-2.42059	1.18e-07	down	naringenin,2-oxoglutarate 3-dioxygenase, putative, expressed
LOC_Os04g49420	6.46214	19.8161	-1.61659	0.0281949	down	Core histone H2A/H2B/H3/H4 domain containing protein, putative, expressed
LOC_Os04g54620	58.7803	72.8999	-0.310583	1.41e-05	down	expressed protein
LOC_Os04g56230	16.261	35.4038	-1.12249	5.57e-28	down	polyprenyl synthetase, putative, expressed
LOC_Os04g56470	0.235822	1.02248	-2.11631	0.0104295	down	amino acid transporter, putative, expressed
LOC_Os04g56680	1.52273	5.97651	-1.97264	8.58e-05	down	OsSAUR22 - Auxin-responsive SAUR gene family member, expressed
LOC_Os04g58720	0.63082	1.36555	-1.11418	0.0183133	down	anthranilate phosphoribosyltransferase, putative, expressed
LOC_Os04g59320	1.7111	3.68552	-1.10694	0.00314705	down	protein kinase domain containing protein, expressed
LOC_Os05g02150	1.37822	3.03802	-1.14033	0.00752926	down	expressed protein
LOC_Os05g02300	3.59713	29.9085	-3.05564	0.00314088	down	Core histone H2A/H2B/H3/H4 domain containing protein, putative, expressed
LOC_Os05g07820	0.152376	0.856247	-2.49039	3.17e-05	down	leucine-rich repeat receptor protein kinase EXS precursor, putative, expressed
LOC_Os05g11980	0.0424432	0.175216	-2.04553	0.000673212	down	timeless protein, expressed
LOC_Os05g29010	0.284172	0.653087	-1.20051	0.0143857	down	POLA4 - Putative DNA polymerase alpha complex subunit, expressed
LOC_Os05g31610	0.0495999	0.138794	-1.48453	0.0459153	down	Leucine Rich Repeat family protein, expressed
LOC_Os05g33570	27.544	58.1935	-1.07912	6.65e-09	down	pyruvate, phosphate dikinase, chloroplast precursor, putative, expressed
LOC_Os05g33890	0.410863	1.02492	-1.31878	0.0388194	down	microtubule associated protein, putative, expressed
LOC_Os05g36280	4.84139	52.3937	-3.4359	0.00548764	down	histone H3, putative, expressed
LOC_Os05g37000	0.273352	1.38127	-2.33717	2.29e-05	down	expressed protein
LOC_Os05g38480	0.498864	1.6821	-1.75355	0.0223411	down	kinesin motor domain containing protein, putative, expressed
LOC_Os05g40200	3.04248	7.57013	-1.31507	6.86e-15	down	inactive receptor kinase At2g26730 precursor, putative, expressed
LOC_Os05g43610	0.105642	0.317694	-1.58845	0.00905354	down	ATBARD1/BARD1, putative, expressed
LOC_Os05g44210	3.89504	9.05716	-1.21742	1.15e-10	down	trehalose-6-phosphate synthase, putative, expressed
LOC_Os05g50680	4.77028	10.1504	-1.08938	0.00173421	down	WRKY83, expressed
LOC_Os05g50960	3.25129	6.71515	-1.04641	2.6e-05	down	polygalacturonase, putative, expressed
LOC_Os05g51220	3.37367	6.61318	-0.971023	0.00548315	down	aspartic proteinase, putative, expressed
LOC_Os06g02019	1.21653	2.80195	-1.20366	7.44e-05	down	cytochrome P450, putative, expressed
LOC_Os06g03030	1.3192	4.46315	-1.7584	0.0185735	down	expressed protein
LOC_Os06g03050	0.243311	0.744533	-1.61353	0.012471	down	expressed protein
LOC_Os06g03710	0.0900914	1.32212	-3.87532	0.00165315	down	DELLA protein SLR1, putative, expressed
LOC_Os06g03720	1.48835	4.94888	-1.73338	0.0157391	down	ribonucleoside-diphosphate reductase small chain, putative, expressed
LOC_Os06g04699	0.419697	1.68677	-2.00684	0.0267793	down	expressed protein
LOC_Os06g06460	2.4012	21.3211	-3.15046	0.00510492	down	histone H3, putative, expressed
LOC_Os06g06510	2.11763	32.6887	-3.94826	0.00780749	down	histone H3, putative, expressed
LOC_Os06g08090	4.95919	10.234	-1.04519	2.31e-13	down	heparanase-like protein precursor, putative, expressed
LOC_Os06g10420	0.863566	2.26382	-1.39038	0.000238166	down	nitrilase, putative, expressed
LOC_Os06g11730	0.301489	0.928816	-1.62328	0.0443279	down	RNA recognition motif containing protein, putative, expressed
LOC_Os06g13210	1.92415	5.16385	-1.42423	1.62e-07	down	peptide transporter PTR2, putative, expressed
LOC_Os06g17490	0.172983	1.45604	-3.07335	0.00067964	down	expressed protein
LOC_Os06g17570	0.636498	2.21786	-1.80094	0.00135512	down	embryogenesis transmembrane protein, putative, expressed
LOC_Os06g21230	495.25	814.997	-0.718638	4.98e-05	down	glycine rich protein family protein, putative, expressed
LOC_Os06g36040	10.0747	21.1068	-1.06698	0.000739241	down	expressed protein
LOC_Os06g36670	0.862184	3.1986	-1.89137	0.0128369	down	bet v I allergen family protein, putative, expressed
LOC_Os06g39750	25.8072	54.5645	-1.08019	0.000135916	down	3-ketoacyl-CoA synthase, putative, expressed
LOC_Os06g41060	5.53437	10.9895	-0.989628	0.000892612	down	helix-loop-helix DNA-binding, putative, expressed
LOC_Os06g44810	0.202225	0.498907	-1.30281	0.0232489	down	expressed protein
LOC_Os06g46350	6.93328	12.8329	-0.888236	0.000392461	down	PLA IIIA/PLP7, putative, expressed
LOC_Os06g46990	0.323478	2.35099	-2.86153	0.00198961	down	expressed protein
LOC_Os06g46995	2.11936	4.08465	-0.946586	0.000243023	down	armadillo/beta-catenin repeat family protein, putative, expressed
LOC_Os06g47600	8.591	23.9074	-1.47656	8.45e-07	down	thaumatin family domain containing protein, expressed
LOC_Os06g51320	0.538046	3.0303	-2.49366	3.83e-10	down	GASR8 - Gibberellin-regulated GASA/GAST/Snakin family protein precursor, expressed
LOC_Os07g05024	0.190157	0.575333	-1.59721	0.0277599	down	expressed protein
LOC_Os07g19140	0.197839	0.455877	-1.20432	4.65e-05	down	retrotransposon protein, putative, unclassified, expressed
LOC_Os07g22580	0.0234253	1.09811	-5.55082	0.00567799	down	rhoGAP domain containing protein, expressed
LOC_Os07g26660	2.79684	7.91775	-1.50129	0.0170573	down	aquaporin protein, putative, expressed
LOC_Os07g29190	0.137097	1.26862	-3.20999	0.024701	down	expressed protein
LOC_Os07g32390	0.260952	1.64791	-2.65879	0.019616	down	targeting protein-related, putative, expressed
LOC_Os07g37110	0.535023	1.26022	-1.236	0.000697651	down	nucleoside transporter, putative, expressed
LOC_Os07g37150	0.180312	0.566829	-1.65242	0.00034589	down	expressed protein
LOC_Os07g37385	1.31687	8.99312	-2.77171	0.00427636	down	LTPL109 - Protease inhibitor/seed storage/LTP family protein precursor, expressed
LOC_Os07g39820	0.383561	1.08898	-1.50545	0.00897109	down	SHR, putative, expressed
LOC_Os07g42560	1.54297	3.2559	-1.07735	7.97e-06	down	expressed protein
LOC_Os07g43120	0.0986511	0.280152	-1.5058	0.0149743	down	transposon protein, putative, unclassified, expressed
LOC_Os07g46540	0.398691	0.835297	-1.06702	0.049027	down	condensin complex subunit 1, putative, expressed
LOC_Os07g48760	0.162298	0.502414	-1.63023	0.00286672	down	CAMK_KIN1/SNF1/Nim1_like.32 - CAMK includes calcium/calmodulin depedent protein kinases, expressed
LOC_Os08g01274	0.117252	0.503875	-2.10346	0.0287769	down	expressed protein
LOC_Os08g03180	0.000197188	0.454408	-11.1702	3.25e-12	down	retrotransposon protein, putative, unclassified, expressed
LOC_Os08g03560	0.0104371	0.190795	-4.19223	0.0174419	down	chloroplast unusual positioning protein, putative, expressed
LOC_Os08g05290	1.0618	2.32097	-1.12822	0.0365376	down	receptor-like protein kinase 5 precursor, putative, expressed
LOC_Os08g06600	0.0791679	0.321492	-2.0218	0.0235018	down	nuf2 family protein, expressed
LOC_Os08g08960	0.367405	1.13914	-1.6325	0.0238149	down	Cupin domain containing protein, expressed
LOC_Os08g10010	4.5261	11.609	-1.3589	0.0335007	down	acyl-desaturase, chloroplast precursor, putative, expressed
LOC_Os08g10180	0.0324888	0.132185	-2.02454	0.00497184	down	retrotransposon protein, putative, unclassified, expressed
LOC_Os08g18920	0.941683	1.99238	-1.08118	5.39e-05	down	protein kinase domain containing protein, expressed
LOC_Os08g32920	0.0902477	0.224086	-1.31209	0.0296743	down	dynamin-2B, putative, expressed
LOC_Os08g33100	29.6166	62.7516	-1.08325	0.0194324	down	core histone H2A/H2B/H3/H4, putative, expressed
LOC_Os08g36570	3.21639	4.86712	-0.597625	0.00709742	down	F-box protein, putative, expressed
LOC_Os08g38300	23.5658	97.4008	-2.04724	0.00150292	down	Core histone H2A/H2B/H3/H4 domain containing protein, putative, expressed
LOC_Os08g39760	0.129614	0.338243	-1.38383	5.34e-06	down	retrotransposon protein, putative, unclassified, expressed
LOC_Os08g41070	0.0274939	0.119675	-2.12193	0.0248516	down	retrotransposon protein, putative, unclassified, expressed
LOC_Os08g42470	0.852255	1.77964	-1.06223	0.0189221	down	BEE 1, putative, expressed
LOC_Os08g44420	0.375256	1.4013	-1.90081	0.0392904	down	kinesin-related protein, putative, expressed
LOC_Os09g02360	0.937705	1.92669	-1.03892	0.0346981	down	cyclin, putative, expressed
LOC_Os09g10730	1.18287	3.55697	-1.58836	0.00109541	down	expressed protein
LOC_Os09g11440	0.0842165	0.666269	-2.98393	0.0187561	down	expressed protein
LOC_Os09g13400	0.328002	0.880346	-1.42437	0.00779406	down	expressed protein
LOC_Os09g16449	0.866728	1.801	-1.05514	6.11e-10	down	pleiotropic drug resistance protein 4, putative, expressed
LOC_Os09g18159	3.58055	6.4016	-0.83825	7.23e-12	down	light repressible receptor protein kinase, putative, expressed
LOC_Os09g19930	10.6733	21.6209	-1.01842	0.00101164	down	HOTHEAD precursor, putative, expressed
LOC_Os09g20090	0.525962	1.45036	-1.46338	0.00972661	down	L-ascorbate oxidase precursor, putative, expressed
LOC_Os09g23560	0.273279	1.23993	-2.18181	0.00201351	down	dehydrogenase, putative, expressed
LOC_Os09g26360	0.271656	0.749025	-1.46323	0.0277573	down	pectinesterase, putative, expressed
LOC_Os09g26590	7.17596	15.6494	-1.12486	2.47e-06	down	OsSAUR37 - Auxin-responsive SAUR gene family member, expressed
LOC_Os09g27750	12.907	45.1605	-1.80691	0.0133159	down	1-aminocyclopropane-1-carboxylate oxidase 1, putative, expressed
LOC_Os09g27820	2.17199	8.24284	-1.92412	5.71e-05	down	1-aminocyclopropane-1-carboxylate oxidase protein, putative, expressed
LOC_Os09g31019	0.072352	3.97577	-5.78006	0.00437393	down	ubiquitin fusion protein, putative, expressed
LOC_Os09g36740	0.0827128	2.3488	-4.82767	0.00690909	down	tetratricopeptide repeat domain containing protein, expressed
LOC_Os09g38450	0.125072	0.931705	-2.89711	1.85e-06	down	expressed protein
LOC_Os10g01570	0.156096	1.31944	-3.07942	0.0363908	down	C-5 cytosine-specific DNA methylase, putative, expressed
LOC_Os10g02680	0.626082	0.7786	-0.31453	0.0129601	down	EF hand family protein, putative, expressed
LOC_Os10g09870	1.0043	2.0672	-1.04149	0.00860258	down	HVA22, putative, expressed
LOC_Os10g20770	0.110869	0.544471	-2.29599	0.0187502	down	expressed protein
LOC_Os10g20890	1.91146	6.99091	-1.8708	0.00274605	down	LTPL137 - Protease inhibitor/seed storage/LTP family protein precursor, expressed
LOC_Os10g28420	0.620501	2.03975	-1.71689	0.00776662	down	IQ calmodulin-binding motif family protein, putative, expressed
LOC_Os10g28630	0.427836	0.943793	-1.14141	0.033099	down	homocysteine S-methyltransferase protein, putative, expressed
LOC_Os10g30280	0.0455292	0.452944	-3.31447	0.000208413	down	OsFBX386 - F-box domain containing protein, expressed
LOC_Os10g31930	0.0535118	0.638371	-3.57647	0.0233864	down	shugoshin-1, putative, expressed
LOC_Os10g35500	0.94088	2.01486	-1.0986	0.0234251	down	epoxide hydrolase, putative, expressed
LOC_Os10g39850	0.161375	0.475266	-1.55832	0.00824239	down	zinc finger, C3HC4 type domain containing protein, expressed
LOC_Os10g40660	0.327441	1.42547	-2.12213	0.00205815	down	ZOS10-07 - C2H2 zinc finger protein, expressed
LOC_Os10g40810	5.55404	12.4053	-1.15934	0.033828	down	GATA zinc finger domain containing protein, expressed
LOC_Os10g42800	0.475918	1.24108	-1.38281	0.00658036	down	AMP-binding enzyme, putative, expressed
LOC_Os10g42910	0.212736	0.472077	-1.14996	0.000603734	down	transposon protein, putative, unclassified, expressed
LOC_Os11g01730	0.16144	1.02101	-2.66092	0.00792637	down	laccase-23 precursor, putative, expressed
LOC_Os11g03370	0.625547	1.32165	-1.07915	0.0105472	down	no apical meristem protein, putative, expressed
LOC_Os11g04380	1.19594	2.93176	-1.29362	0.00404495	down	domain of unknown function, DUF250 domain containing protein, expressed
LOC_Os11g05730	0.364942	13.182	-5.17476	0.00425204	down	histone H3, putative, expressed
LOC_Os11g06730	1.50454	3.89538	-1.37244	0.0189042	down	ECAGL2 - ECA1 gametogenesis related family protein precursor, expressed
LOC_Os11g07912	1.23206	2.52044	-1.0326	0.02055	down	MLO domain containing protein, putative, expressed
LOC_Os11g10560	0.288455	0.652764	-1.17822	0.00932426	down	transposon protein, putative, unclassified, expressed
LOC_Os11g12620	0.452645	1.03017	-1.18643	0.00813436	down	receptor protein kinase CLAVATA1 precursor, putative, expressed
LOC_Os11g15624	0.279743	2.39836	-3.09987	0.0126905	down	expressed protein
LOC_Os11g18660	0.914044	2.1354	-1.22417	0.0130608	down	expressed protein
LOC_Os11g28910	0.179818	0.482379	-1.42363	0.00362099	down	transposon protein, putative, CACTA, En/Spm sub-class, expressed
LOC_Os11g28950	0.0588173	0.19145	-1.70266	0.00679202	down	pollen signalling protein with adenylyl cyclase activity, putative, expressed
LOC_Os11g29740	0.0959245	2.14519	-4.48306	8.82e-06	down	expressed protein
LOC_Os11g31570	0.208553	0.60687	-1.54097	0.00824239	down	expressed protein
LOC_Os11g31940	1.61381	3.1366	-0.958735	0.0176798	down	GDSL-like lipase/acylhydrolase, putative, expressed
LOC_Os11g32490	0.375422	1.02328	-1.44661	4.12e-05	down	expressed protein
LOC_Os11g33270	0.748943	3.35757	-2.16449	6.23e-06	down	glycosyl hydrolases family 16, putative, expressed
LOC_Os11g34110	2.36617	6.15495	-1.37919	9.42e-09	down	heparan-alpha-glucosaminide N-acetyltransferase, putative, expressed
LOC_Os11g35860	1.09788	2.4074	-1.13276	9.67e-08	down	OsWAK120 - OsWAK receptor-like protein kinase, expressed
LOC_Os11g37100	0.0702485	0.649074	-3.20784	0.00943419	down	expressed protein
LOC_Os11g37700	0.616208	1.54494	-1.32606	2.27e-07	down	pleiotropic drug resistance protein, putative, expressed
LOC_Os11g39450	0.19755	0.496343	-1.32912	0.0181761	down	cysteine-rich receptor-like protein kinase 7 precursor, putative, expressed
LOC_Os11g42170	1.28242	2.86204	-1.15818	0.0128815	down	expressed protein
LOC_Os11g43420	0.269993	0.539592	-0.998943	0.0230511	down	LZ-NBS-LRR class RGA, putative, expressed
LOC_Os11g45540	0.0762987	0.471431	-2.62732	0.000684296	down	TKL_IRAK_DUF26-lh.11 - DUF26 kinases have homology to DUF26 containing loci, expressed
LOC_Os11g45580	0.0741798	0.354774	-2.2578	0.00664015	down	embryogenesis transmembrane protein, putative, expressed
LOC_Os12g02300	199.829	421.866	-1.07802	0.000112435	down	LTPL26 - Protease inhibitor/seed storage/LTP family protein precursor, expressed
LOC_Os12g02550	0.560549	1.66322	-1.56907	0.0011496	down	expressed protein
LOC_Os12g02710	0.0158121	0.232452	-3.87784	0.0375084	down	expressed protein
LOC_Os12g03410	0.50061	1.21345	-1.27735	4.49e-05	down	expressed protein
LOC_Os12g06980	0.104523	0.49862	-2.25412	0.0227197	down	SAP domain containing protein, expressed
LOC_Os12g07310	1.32083	2.71428	-1.03913	0.0362991	down	citrate-binding protein precursor, putative, expressed
LOC_Os12g08850	0.273381	0.7085	-1.37386	0.0182491	down	expressed protein
LOC_Os12g08920	3.44102	13.0125	-1.91898	0.000271828	down	peroxidase precursor, putative, expressed
LOC_Os12g10670	0.177376	0.447446	-1.3349	0.000200794	down	AAA-type ATPase family protein, putative, expressed
LOC_Os12g10750	0.434494	1.23737	-1.50987	0.0117295	down	ARGOS, putative, expressed
LOC_Os12g13950	0.0934682	0.515262	-2.46276	0.0279114	down	POLA2 - Putative DNA polymerase alpha complex subunit, expressed
LOC_Os12g35670	5.91015	14.8957	-1.33362	1.66e-08	down	RALFL4 - Rapid ALkalinization Factor RALF family protein precursor, expressed
LOC_Os12g37280	0.0827863	0.272381	-1.71816	0.0478959	down	Leucine Rich Repeat family protein, expressed
LOC_Os12g37400	0.173822	1.11849	-2.68587	0.000520929	down	MCM7 - Putative minichromosome maintenance MCM complex subunit 7, expressed
LOC_Os12g39980	0.0826528	0.561709	-2.76469	0.0145255	down	kinesin motor domain containing protein, putative, expressed
LOC_Os12g40200	0.132856	0.384769	-1.53413	0.00651255	down	expressed protein
LOC_Os12g40860	0.233888	1.03288	-2.14278	0.0355759	down	Leucine Rich Repeat family protein, expressed
LOC_Os12g41910	1.35428	3.37749	-1.31843	0.00982894	down	BTBN25 - Bric-a-Brac, Tramtrack, Broad Complex BTB domain with non-phototropic hypocotyl 3 NPH3 and coiled-coil domains, expressed
LOC_Os12g42160	0.380977	0.976056	-1.35726	0.0258736	down	kinesin motor domain containing protein, putative, expressed
LOC_Os12g44280	0.885102	2.94986	-1.73673	0.0124302	down	subtilase, putative, expressed

## Sheet: Sheet 2, OE_GO enrichment
Sheet 2. GO enrichment of genes in Group II.
GO_ID	GO_term	ontology	Items	p_adj	pvalue	MSU Locus
GO:0008283	cell proliferation	Biological Process	30	0	0	LOC_Os11g05730;LOC_Os05g29010;LOC_Os09g36740;LOC_Os03g11540;LOC_Os01g01170;LOC_Os05g33890;LOC_Os10g28630;LOC_Os01g49200;LOC_Os06g06460;LOC_Os08g44420;LOC_Os02g50910;LOC_Os04g48760;LOC_Os02g55410;LOC_Os01g33040;LOC_Os08g36570;LOC_Os04g39110;LOC_Os03g06670;LOC_Os02g30800;LOC_Os04g49130;LOC_Os12g37400;LOC_Os04g28260;LOC_Os04g34240;LOC_Os04g30720;LOC_Os12g13950;LOC_Os08g33100;LOC_Os12g39980;LOC_Os05g…
GO:0006275	regulation of DNA replication	Biological Process	16	9.36207e-09	9.62186e-12	LOC_Os03g11540;LOC_Os09g36740;LOC_Os04g28260;LOC_Os05g38480;LOC_Os01g01170;LOC_Os05g33890;LOC_Os08g44420;LOC_Os01g49200;LOC_Os12g13950;LOC_Os02g55410;LOC_Os07g32390;LOC_Os09g28580;LOC_Os08g44360;LOC_Os08g36570;LOC_Os03g02290;LOC_Os12g39980
GO:0051567	histone H3-K9 methylation	Biological Process	21	9.71488e-09	9.98446e-12	LOC_Os10g28630;LOC_Os12g42160;LOC_Os01g01170;LOC_Os05g33890;LOC_Os09g36740;LOC_Os03g11540;LOC_Os05g29010;LOC_Os04g48760;LOC_Os08g44420;LOC_Os01g49200;LOC_Os10g01570;LOC_Os02g55410;LOC_Os12g37400;LOC_Os01g74146;LOC_Os02g30800;LOC_Os04g28260;LOC_Os08g44360;LOC_Os12g13950;LOC_Os07g32390;LOC_Os03g02290;LOC_Os12g39980
GO:0000786	nucleosome	Cellular Component	14	1.42582e-09	1.21865e-11	LOC_Os08g33100;LOC_Os12g41910;LOC_Os11g05730;LOC_Os03g06670;LOC_Os02g45940;LOC_Os01g31800;LOC_Os05g36280;LOC_Os05g02300;LOC_Os06g06460;LOC_Os06g06510;LOC_Os04g34240;LOC_Os04g49420;LOC_Os08g38300;LOC_Os01g64640
GO:0006334	nucleosome assembly	Biological Process	14	2.73432e-08	2.8102e-11	LOC_Os08g33100;LOC_Os12g41910;LOC_Os11g05730;LOC_Os02g45940;LOC_Os03g06670;LOC_Os05g36280;LOC_Os01g31800;LOC_Os05g02300;LOC_Os06g06460;LOC_Os06g06510;LOC_Os04g49420;LOC_Os04g34240;LOC_Os08g38300;LOC_Os01g64640
GO:0000911	cytokinesis by cell plate formation	Biological Process	22	3.93259e-08	4.04171e-11	LOC_Os04g30720;LOC_Os07g32390;LOC_Os03g02290;LOC_Os04g15800;LOC_Os01g70560;LOC_Os05g38480;LOC_Os12g42160;LOC_Os05g33890;LOC_Os08g44420;LOC_Os02g50910;LOC_Os01g49200;LOC_Os07g48760;LOC_Os06g03710;LOC_Os04g48760;LOC_Os06g17490;LOC_Os01g33040;LOC_Os02g55410;LOC_Os01g50420;LOC_Os05g46760;LOC_Os09g28580;LOC_Os01g74146;LOC_Os01g42070
GO:0008017	microtubule binding	Molecular Function	13	4.91937e-08	1.57168e-10	LOC_Os05g33890;LOC_Os12g42160;LOC_Os05g38480;LOC_Os01g33040;LOC_Os07g32390;LOC_Os04g28260;LOC_Os04g30720;LOC_Os01g42070;LOC_Os03g02290;LOC_Os02g50910;LOC_Os08g44420;LOC_Os01g49200;LOC_Os12g39980
GO:0010389	regulation of G2/M transition of mitotic cell cycle	Biological Process	12	2.60141e-07	2.6736e-10	LOC_Os01g49200;LOC_Os12g39980;LOC_Os03g02290;LOC_Os09g28580;LOC_Os05g38480;LOC_Os08g36570;LOC_Os05g33890;LOC_Os04g28260;LOC_Os03g11540;LOC_Os12g13950;LOC_Os02g55410;LOC_Os07g32390
GO:0006306	DNA methylation	Biological Process	18	8.09828e-07	8.323e-10	LOC_Os02g30800;LOC_Os01g74146;LOC_Os12g37400;LOC_Os02g55410;LOC_Os08g44420;LOC_Os04g48760;LOC_Os09g36740;LOC_Os03g11540;LOC_Os05g29010;LOC_Os12g42160;LOC_Os01g01170;LOC_Os10g28630;LOC_Os12g39980;LOC_Os03g02290;LOC_Os12g13950;LOC_Os07g32390;LOC_Os08g44360;LOC_Os04g28260
GO:0007018	microtubule-based movement	Biological Process	11	2.95599e-06	3.03801e-09	LOC_Os12g39980;LOC_Os03g02290;LOC_Os02g50910;LOC_Os08g44420;LOC_Os01g42070;LOC_Os04g30720;LOC_Os03g01530;LOC_Os04g28260;LOC_Os01g33040;LOC_Os12g42160;LOC_Os05g38480
GO:0051225	spindle assembly	Biological Process	10	4.2471e-06	4.36496e-09	LOC_Os04g30720;LOC_Os01g49200;LOC_Os12g39980;LOC_Os01g74146;LOC_Os09g28580;LOC_Os05g38480;LOC_Os05g33890;LOC_Os04g28260;LOC_Os01g70560;LOC_Os07g32390
GO:0006270	DNA replication initiation	Biological Process	11	8.32772e-06	8.55881e-09	LOC_Os04g28260;LOC_Os09g36740;LOC_Os03g11540;LOC_Os12g13950;LOC_Os02g55410;LOC_Os07g32390;LOC_Os01g01170;LOC_Os08g36570;LOC_Os12g39980;LOC_Os12g37400;LOC_Os08g44420
GO:0005871	kinesin complex	Cellular Component	10	1.37817e-06	1.17793e-08	LOC_Os01g33040;LOC_Os04g28260;LOC_Os05g38480;LOC_Os12g42160;LOC_Os02g50910;LOC_Os08g44420;LOC_Os03g02290;LOC_Os12g39980;LOC_Os04g30720;LOC_Os01g42070
GO:0046982	protein heterodimerization activity	Molecular Function	15	9.3572e-06	2.98952e-08	LOC_Os08g38300;LOC_Os03g06670;LOC_Os02g45940;LOC_Os06g06460;LOC_Os11g03370;LOC_Os11g05730;LOC_Os06g06510;LOC_Os04g49420;LOC_Os01g64640;LOC_Os01g31800;LOC_Os05g36280;LOC_Os05g02300;LOC_Os08g33100;LOC_Os04g34240;LOC_Os03g42630
GO:0005874	microtubule	Cellular Component	12	4.76381e-06	4.07163e-08	LOC_Os05g38480;LOC_Os12g42160;LOC_Os04g28260;LOC_Os03g01530;LOC_Os07g32390;LOC_Os01g33040;LOC_Os01g42070;LOC_Os04g30720;LOC_Os12g39980;LOC_Os08g44420;LOC_Os02g50910;LOC_Os03g02290
GO:0010200	response to chitin	Biological Process	35	0.000204944	2.10631e-07	LOC_Os01g60600;LOC_Os05g02150;LOC_Os09g16449;LOC_Os01g72530;LOC_Os02g52670;LOC_Os06g47600;LOC_Os04g58810;LOC_Os08g37180;LOC_Os08g34170;LOC_Os04g55520;LOC_Os03g60570;LOC_Os02g21340;LOC_Os01g48570;LOC_Os05g03760;LOC_Os11g37700;LOC_Os05g37250;LOC_Os01g09100;LOC_Os02g41510;LOC_Os04g52090;LOC_Os01g64020;LOC_Os02g47470;LOC_Os02g33680;LOC_Os02g08440;LOC_Os08g30850;LOC_Os01g54890;LOC_Os11g45540;LOC_Os06g…
GO:0006342	chromatin silencing	Biological Process	14	0.0015567	1.59989e-06	LOC_Os05g38480;LOC_Os03g12140;LOC_Os12g42160;LOC_Os05g33890;LOC_Os08g44420;LOC_Os01g49200;LOC_Os10g01570;LOC_Os09g28580;LOC_Os12g37400;LOC_Os01g74146;LOC_Os08g06600;LOC_Os08g44360;LOC_Os07g32390;LOC_Os03g02290
GO:0003777	microtubule motor activity	Molecular Function	7	0.000607156	1.93979e-06	LOC_Os04g30720;LOC_Os01g42070;LOC_Os05g38480;LOC_Os01g33040;LOC_Os08g44420;LOC_Os02g50910;LOC_Os12g39980
GO:0006260	DNA replication	Biological Process	12	0.00268896	2.76358e-06	LOC_Os01g50420;LOC_Os01g33040;LOC_Os05g46760;LOC_Os02g30800;LOC_Os01g42070;LOC_Os03g11540;LOC_Os06g03720;LOC_Os10g28630;LOC_Os12g42160;LOC_Os12g10670;LOC_Os01g50410;LOC_Os04g48760
GO:0010583	response to cyclopentenone	Biological Process	13	0.0139152	1.43013e-05	LOC_Os04g53930;LOC_Os01g70560;LOC_Os01g09100;LOC_Os06g46950;LOC_Os09g23560;LOC_Os01g33040;LOC_Os04g46220;LOC_Os09g28440;LOC_Os09g21710;LOC_Os02g52670;LOC_Os04g41960;LOC_Os03g02290;LOC_Os05g41780
GO:0016572	histone phosphorylation	Biological Process	8	0.022455	2.30781e-05	LOC_Os01g49200;LOC_Os04g15800;LOC_Os03g02290;LOC_Os05g33890;LOC_Os08g36570;LOC_Os08g44360;LOC_Os07g32390;LOC_Os01g33040
GO:0009611	response to wounding	Biological Process	30	0.0225834	2.32101e-05	LOC_Os05g37250;LOC_Os04g01470;LOC_Os01g09100;LOC_Os05g44210;LOC_Os02g46460;LOC_Os03g60570;LOC_Os04g55520;LOC_Os02g56510;LOC_Os05g27010;LOC_Os08g44360;LOC_Os11g10560;LOC_Os08g34170;LOC_Os04g58810;LOC_Os01g72530;LOC_Os01g56380;LOC_Os06g39750;LOC_Os02g05970;LOC_Os12g02300;LOC_Os06g29790;LOC_Os09g21710;LOC_Os02g05940;LOC_Os10g30280;LOC_Os06g03930;LOC_Os11g45540;LOC_Os11g03370;LOC_Os05g07820;LOC_Os01g…
GO:0009693	ethylene biosynthetic process	Biological Process	11	0.023434	2.40842e-05	LOC_Os06g46950;LOC_Os09g27820;LOC_Os04g58810;LOC_Os09g27750;LOC_Os01g54890;LOC_Os04g52090;LOC_Os11g45540;LOC_Os01g72530;LOC_Os06g11730;LOC_Os02g52670;LOC_Os08g34170
GO:0048519	negative regulation of biological process	Biological Process	16	0.0257642	2.64791e-05	LOC_Os02g05940;LOC_Os10g40660;LOC_Os01g60600;LOC_Os08g05290;LOC_Os12g10670;LOC_Os04g30720;LOC_Os01g50420;LOC_Os01g33040;LOC_Os10g01570;LOC_Os07g42250;LOC_Os02g08440;LOC_Os01g42070;LOC_Os04g07150;LOC_Os11g39450;LOC_Os01g68730;LOC_Os06g03710
GO:0008574	plus-end-directed microtubule motor activity	Molecular Function	4	0.00836664	2.67305e-05	LOC_Os12g42160;LOC_Os04g28260;LOC_Os12g39980;LOC_Os03g02290
GO:0009414	response to water deprivation	Biological Process	32	0.0353547	3.63358e-05	LOC_Os10g09870;LOC_Os05g41780;LOC_Os09g21710;LOC_Os09g28440;LOC_Os04g46220;LOC_Os11g01730;LOC_Os04g49420;LOC_Os08g05290;LOC_Os02g47470;LOC_Os11g30500;LOC_Os03g42630;LOC_Os02g45420;LOC_Os11g12620;LOC_Os11g03370;LOC_Os05g51220;LOC_Os12g02200;LOC_Os06g11730;LOC_Os02g43940;LOC_Os02g21340;LOC_Os04g55520;LOC_Os02g45940;LOC_Os05g44210;LOC_Os02g46460;LOC_Os06g21230;LOC_Os05g37250;LOC_Os11g37700;LOC_Os04g…
GO:0080175	phragmoplast microtubule organization	Biological Process	4	0.0422455	4.34178e-05	LOC_Os04g28260;LOC_Os12g39980;LOC_Os12g42160;LOC_Os03g02290
GO:0048453	sepal formation	Biological Process	7	0.0468863	4.81874e-05	LOC_Os06g03710;LOC_Os03g02290;LOC_Os12g39980;LOC_Os12g42160;LOC_Os08g31850;LOC_Os01g64020;LOC_Os04g28260
GO:0003700	sequence-specific DNA binding transcription factor activity	Molecular Function	35	0.0169934	5.42921e-05	LOC_Os11g03370;LOC_Os02g43940;LOC_Os01g13520;LOC_Os02g45420;LOC_Os01g54890;LOC_Os02g08440;LOC_Os03g51910;LOC_Os03g15790;LOC_Os01g64020;LOC_Os09g35010;LOC_Os03g42630;LOC_Os04g52090;LOC_Os02g41510;LOC_Os10g40810;LOC_Os06g41060;LOC_Os01g36220;LOC_Os04g46220;LOC_Os09g28440;LOC_Os07g39820;LOC_Os04g23550;LOC_Os05g41780;LOC_Os08g42470;LOC_Os02g52670;LOC_Os05g02150;LOC_Os01g61900;LOC_Os01g60600;LOC_Os11g…
GO:0000280	nuclear division	Biological Process	6	0.0611263	6.28225e-05	LOC_Os12g39980;LOC_Os01g49200;LOC_Os03g02290;LOC_Os09g28580;LOC_Os04g28260;LOC_Os07g32390
GO:0000914	phragmoplast assembly	Biological Process	4	0.0777372	7.98943e-05	LOC_Os12g42160;LOC_Os04g28260;LOC_Os12g39980;LOC_Os03g02290
GO:0009612	response to mechanical stimulus	Biological Process	8	0.0880554	9.04989e-05	LOC_Os02g52040;LOC_Os11g33270;LOC_Os02g52010;LOC_Os02g16500;LOC_Os08g34170;LOC_Os04g58810;LOC_Os01g54890;LOC_Os04g46220
GO:0048451	petal formation	Biological Process	7	0.104941	0.000107853	LOC_Os06g03710;LOC_Os12g39980;LOC_Os03g02290;LOC_Os12g42160;LOC_Os08g31850;LOC_Os04g28260;LOC_Os01g64020
GO:0071497	cellular response to freezing	Biological Process	5	0.138567	0.000142412	LOC_Os02g52670;LOC_Os04g46220;LOC_Os04g55520;LOC_Os09g28440;LOC_Os05g41780
GO:0042538	hyperosmotic salinity response	Biological Process	18	0.173405	0.000178217	LOC_Os07g48760;LOC_Os12g02200;LOC_Os06g46950;LOC_Os02g52670;LOC_Os04g42860;LOC_Os11g30500;LOC_Os03g42630;LOC_Os09g16449;LOC_Os12g08920;LOC_Os05g37250;LOC_Os11g37700;LOC_Os09g28440;LOC_Os05g44210;LOC_Os02g46460;LOC_Os02g21340;LOC_Os03g60570;LOC_Os09g21710;LOC_Os05g27010
GO:0006605	protein targeting	Biological Process	7	0.189243	0.000194494	LOC_Os04g49130;LOC_Os06g06460;LOC_Os05g36280;LOC_Os01g64640;LOC_Os04g34240;LOC_Os06g06510;LOC_Os11g05730
GO:0002679	respiratory burst involved in defense response	Biological Process	13	0.221753	0.000227906	LOC_Os05g41780;LOC_Os01g53840;LOC_Os04g52090;LOC_Os02g52670;LOC_Os06g47600;LOC_Os04g58810;LOC_Os01g48570;LOC_Os04g46220;LOC_Os09g28440;LOC_Os01g54890;LOC_Os11g45540;LOC_Os08g37180;LOC_Os08g34170
GO:0001578	microtubule bundle formation	Biological Process	4	0.310001	0.000318603	LOC_Os01g49200;LOC_Os05g33890;LOC_Os05g11130;LOC_Os07g32390
GO:0048229	gametophyte development	Biological Process	9	0.322338	0.000331282	LOC_Os02g05940;LOC_Os05g07820;LOC_Os03g18630;LOC_Os08g05290;LOC_Os01g48570;LOC_Os11g12620;LOC_Os01g68730;LOC_Os04g48760;LOC_Os04g30720
GO:0009867	jasmonic acid mediated signaling pathway	Biological Process	20	0.370134	0.000380405	LOC_Os02g21340;LOC_Os09g21710;LOC_Os05g41780;LOC_Os01g09100;LOC_Os05g37250;LOC_Os11g37700;LOC_Os05g03760;LOC_Os05g39240;LOC_Os05g44210;LOC_Os01g48570;LOC_Os06g47600;LOC_Os01g64020;LOC_Os10g25290;LOC_Os03g42630;LOC_Os09g16449;LOC_Os04g52090;LOC_Os02g41510;LOC_Os08g37180;LOC_Os01g02750;LOC_Os02g51910
GO:0050832	defense response to fungus	Biological Process	28	0.416278	0.000427829	LOC_Os02g52040;LOC_Os05g40010;LOC_Os09g23560;LOC_Os01g48570;LOC_Os01g09100;LOC_Os12g08920;LOC_Os05g03760;LOC_Os10g20890;LOC_Os01g22352;LOC_Os02g52670;LOC_Os06g47600;LOC_Os02g29640;LOC_Os08g37180;LOC_Os02g52010;LOC_Os09g28440;LOC_Os05g39240;LOC_Os04g52090;LOC_Os02g41510;LOC_Os01g64020;LOC_Os02g47470;LOC_Os03g42630;LOC_Os01g54890;LOC_Os02g45420;LOC_Os01g02750;LOC_Os11g45540;LOC_Os06g11730;LOC_Os02g…
GO:0044782	cilium organization	Biological Process	3	0.483863	0.00049729	LOC_Os12g42160;LOC_Os04g28260;LOC_Os03g02290
GO:0030410	nicotianamine synthase activity	Molecular Function	2	0.163853	0.000523492	LOC_Os03g19427;LOC_Os03g19420
GO:0009909	regulation of flower development	Biological Process	16	0.522711	0.000537216	LOC_Os01g64020;LOC_Os01g02060;LOC_Os01g61900;LOC_Os05g38480;LOC_Os01g68730;LOC_Os03g06670;LOC_Os07g32390;LOC_Os12g13950;LOC_Os03g02290;LOC_Os03g11540;LOC_Os05g33890;LOC_Os12g42160;LOC_Os08g44420;LOC_Os01g49200;LOC_Os02g55410;LOC_Os09g28440
GO:0009723	response to ethylene	Biological Process	18	0.591651	0.000608069	LOC_Os09g21710;LOC_Os02g21340;LOC_Os03g02290;LOC_Os04g01470;LOC_Os05g37250;LOC_Os11g37700;LOC_Os12g02300;LOC_Os12g42160;LOC_Os01g09100;LOC_Os05g44210;LOC_Os01g50420;LOC_Os03g42630;LOC_Os09g16449;LOC_Os02g41510;LOC_Os01g60600;LOC_Os07g48760;LOC_Os08g37180;LOC_Os06g46950
GO:0005516	calmodulin binding	Molecular Function	12	0.20271	0.000647635	LOC_Os02g06930;LOC_Os01g57370;LOC_Os04g56680;LOC_Os02g08440;LOC_Os11g07912;LOC_Os01g64020;LOC_Os09g26590;LOC_Os02g24700;LOC_Os10g28420;LOC_Os02g07110;LOC_Os12g39980;LOC_Os03g02290
GO:0030418	nicotianamine biosynthetic process	Biological Process	2	0.652484	0.00067059	LOC_Os03g19420;LOC_Os03g19427
GO:0031514	motile cilium	Cellular Component	3	0.0792141	0.000677044	LOC_Os04g28260;LOC_Os12g42160;LOC_Os03g02290
GO:0009751	response to salicylic acid	Biological Process	16	0.724239	0.000744336	LOC_Os10g25290;LOC_Os04g42860;LOC_Os02g41510;LOC_Os01g60600;LOC_Os06g17490;LOC_Os02g06930;LOC_Os11g35860;LOC_Os04g55520;LOC_Os05g27010;LOC_Os10g30280;LOC_Os05g41780;LOC_Os04g01470;LOC_Os12g02300;LOC_Os02g46460;LOC_Os04g46220;LOC_Os04g39110
GO:0009817	defense response to fungus, incompatible interaction	Biological Process	7	0.76969	0.000791049	LOC_Os01g53840;LOC_Os12g43490;LOC_Os09g16449;LOC_Os11g37700;LOC_Os01g71820;LOC_Os02g21340;LOC_Os11g07912
GO:0009694	jasmonic acid metabolic process	Biological Process	7	0.76969	0.000791049	LOC_Os06g03930;LOC_Os01g71310;LOC_Os08g42470;LOC_Os12g17160;LOC_Os03g51910;LOC_Os06g41060;LOC_Os09g28440
GO:0000226	microtubule cytoskeleton organization	Biological Process	10	0.805754	0.000828113	LOC_Os01g42070;LOC_Os06g03710;LOC_Os04g48760;LOC_Os06g17490;LOC_Os08g44420;LOC_Os12g42160;LOC_Os03g18630;LOC_Os03g02290;LOC_Os04g15800;LOC_Os04g30720
GO:0009738	abscisic acid-activated signaling pathway	Biological Process	16	0.877437	0.000901785	LOC_Os05g39240;LOC_Os05g44210;LOC_Os11g37700;LOC_Os05g37250;LOC_Os02g21340;LOC_Os09g21710;LOC_Os04g58810;LOC_Os06g46950;LOC_Os08g34170;LOC_Os07g48760;LOC_Os01g60600;LOC_Os01g72530;LOC_Os06g36670;LOC_Os09g16449;LOC_Os03g42630;LOC_Os01g47580
GO:0009749	response to glucose	Biological Process	8	0.888908	0.000913574	LOC_Os05g39240;LOC_Os09g28440;LOC_Os04g52090;LOC_Os03g12290;LOC_Os02g21340;LOC_Os02g52670;LOC_Os07g48760;LOC_Os11g37700
GO:0009664	plant-type cell wall organization	Biological Process	16	1	0.00103334	LOC_Os01g53840;LOC_Os03g21820;LOC_Os05g42230;LOC_Os02g51040;LOC_Os01g33080;LOC_Os11g12620;LOC_Os05g40200;LOC_Os06g11730;LOC_Os03g18630;LOC_Os07g22580;LOC_Os02g46460;LOC_Os05g44210;LOC_Os12g08920;LOC_Os05g33890;LOC_Os04g59320;LOC_Os01g49200
GO:0046785	microtubule polymerization	Biological Process	2	1	0.00110976	LOC_Os01g49200;LOC_Os05g33890
GO:0009617	response to bacterium	Biological Process	16	1	0.00112356	LOC_Os03g42630;LOC_Os08g33100;LOC_Os08g05290;LOC_Os11g03370;LOC_Os01g71820;LOC_Os01g50410;LOC_Os06g17490;LOC_Os11g12620;LOC_Os02g08440;LOC_Os12g29330;LOC_Os04g55520;LOC_Os10g30280;LOC_Os01g50420;LOC_Os09g18159;LOC_Os05g44210;LOC_Os09g23560
GO:0055028	cortical microtubule	Cellular Component	3	0.138365	0.0011826	LOC_Os07g32390;LOC_Os05g33890;LOC_Os01g49200
GO:0007389	pattern specification process	Biological Process	10	1	0.0012334	LOC_Os01g42070;LOC_Os02g05970;LOC_Os05g38480;LOC_Os05g33890;LOC_Os01g49200;LOC_Os05g40200;LOC_Os03g18630;LOC_Os11g33270;LOC_Os04g30720;LOC_Os01g02060
GO:0043069	negative regulation of programmed cell death	Biological Process	16	1	0.00130279	LOC_Os01g53840;LOC_Os09g16449;LOC_Os03g42630;LOC_Os02g52670;LOC_Os01g64020;LOC_Os06g47600;LOC_Os11g45540;LOC_Os08g37180;LOC_Os01g02750;LOC_Os02g21340;LOC_Os01g48570;LOC_Os09g28440;LOC_Os05g39240;LOC_Os10g20890;LOC_Os11g37700;LOC_Os04g59320
GO:0009753	response to jasmonic acid	Biological Process	16	1	0.00130279	LOC_Os02g46460;LOC_Os09g23560;LOC_Os06g41060;LOC_Os04g55520;LOC_Os08g42470;LOC_Os05g27010;LOC_Os10g30280;LOC_Os06g03930;LOC_Os01g71310;LOC_Os11g03370;LOC_Os05g07820;LOC_Os06g46950;LOC_Os03g51910;LOC_Os01g72530;LOC_Os01g60600;LOC_Os02g41510
GO:2000488	positive regulation of brassinosteroid biosynthetic process	Biological Process	3	1	0.00138628	LOC_Os06g41060;LOC_Os08g42470;LOC_Os03g51910
GO:0009620	response to fungus	Biological Process	11	1	0.00146537	LOC_Os04g46220;LOC_Os05g44210;LOC_Os09g27820;LOC_Os02g08440;LOC_Os11g03370;LOC_Os09g38910;LOC_Os05g37250;LOC_Os03g45720;LOC_Os09g27750;LOC_Os11g35860;LOC_Os01g72530
GO:0009741	response to brassinosteroid	Biological Process	9	1	0.00151397	LOC_Os02g35329;LOC_Os12g35670;LOC_Os02g52010;LOC_Os03g25490;LOC_Os02g52040;LOC_Os04g40560;LOC_Os02g05940;LOC_Os03g45720;LOC_Os05g07820
GO:0043622	cortical microtubule organization	Biological Process	5	1	0.00167589	LOC_Os01g50410;LOC_Os01g49200;LOC_Os01g50420;LOC_Os05g46760;LOC_Os05g33890
GO:0008094	DNA-dependent ATPase activity	Molecular Function	3	0.870086	0.00277983	LOC_Os01g71690;LOC_Os12g37400;LOC_Os02g55410
GO:0005730	nucleolus	Cellular Component	25	0.329098	0.0028128	LOC_Os05g36280;LOC_Os04g49420;LOC_Os04g52090;LOC_Os08g33100;LOC_Os08g38300;LOC_Os03g06670;LOC_Os06g11730;LOC_Os04g16740;LOC_Os03g01530;LOC_Os05g41780;LOC_Os09g28440;LOC_Os01g31800;LOC_Os01g64640;LOC_Os01g61900;LOC_Os02g52670;LOC_Os06g06460;LOC_Os05g50680;LOC_Os09g31019;LOC_Os01g17330;LOC_Os05g02300;LOC_Os06g06510;LOC_Os04g34240;LOC_Os06g21230;LOC_Os02g45940;LOC_Os11g05730
GO:0009815	1-aminocyclopropane-1-carboxylate oxidase activity	Molecular Function	2	0.952926	0.00304449	LOC_Os09g27820;LOC_Os09g27750
GO:0042555	MCM complex	Cellular Component	2	0.438341	0.0037465	LOC_Os12g37400;LOC_Os02g55410
GO:0005576	extracellular region	Cellular Component	33	0.472125	0.00403526	LOC_Os02g52010;LOC_Os01g03680;LOC_Os01g03360;LOC_Os06g46950;LOC_Os02g51040;LOC_Os03g21000;LOC_Os03g21820;LOC_Os03g12140;LOC_Os10g20890;LOC_Os05g37250;LOC_Os06g50400;LOC_Os01g68598;LOC_Os11g35860;LOC_Os02g52040;LOC_Os06g28670;LOC_Os11g06730;LOC_Os01g68730;LOC_Os05g51220;LOC_Os05g50960;LOC_Os11g07830;LOC_Os05g40200;LOC_Os09g19930;LOC_Os12g35670;LOC_Os06g51320;LOC_Os04g42860;LOC_Os02g47470;LOC_Os09g…
GO:0003887	DNA-directed DNA polymerase activity	Molecular Function	3	1	0.00432871	LOC_Os12g10670;LOC_Os12g13950;LOC_Os02g30800
GO:0004674	protein serine/threonine kinase activity	Molecular Function	32	1	0.00437917	LOC_Os01g33950;LOC_Os05g40200;LOC_Os11g45540;LOC_Os05g46760;LOC_Os08g18920;LOC_Os05g07820;LOC_Os05g33570;LOC_Os11g39450;LOC_Os02g35760;LOC_Os11g02300;LOC_Os04g12540;LOC_Os03g18630;LOC_Os04g48760;LOC_Os06g17490;LOC_Os01g53840;LOC_Os01g50420;LOC_Os01g48570;LOC_Os01g02750;LOC_Os12g02200;LOC_Os01g50410;LOC_Os11g12620;LOC_Os08g05290;LOC_Os04g59320;LOC_Os02g05970;LOC_Os09g38910;LOC_Os09g18159;LOC_Os02g…
GO:0015086	cadmium ion transmembrane transporter activity	Molecular Function	3	1	0.00587947	LOC_Os11g37700;LOC_Os02g21340;LOC_Os09g16449
GO:0015630	microtubule cytoskeleton	Cellular Component	4	0.920832	0.00787036	LOC_Os04g28260;LOC_Os01g50420;LOC_Os01g42070;LOC_Os04g30720
GO:0009524	phragmoplast	Cellular Component	8	0.937392	0.0080119	LOC_Os01g49200;LOC_Os01g50410;LOC_Os12g42160;LOC_Os05g33890;LOC_Os04g28260;LOC_Os12g39980;LOC_Os03g02290;LOC_Os01g33040
GO:0008569	minus-end-directed microtubule motor activity	Molecular Function	2	1	0.0085549	LOC_Os12g42160;LOC_Os03g02290
GO:0044430	cytoskeletal part	Cellular Component	4	1	0.0111458	LOC_Os04g28260;LOC_Os01g50420;LOC_Os01g42070;LOC_Os04g30720
GO:0009505	plant-type cell wall	Cellular Component	28	1	0.0117279	LOC_Os03g64340;LOC_Os12g35670;LOC_Os12g42860;LOC_Os05g08420;LOC_Os01g66110;LOC_Os05g40200;LOC_Os05g51220;LOC_Os02g16940;LOC_Os03g06290;LOC_Os03g14140;LOC_Os02g26480;LOC_Os06g08090;LOC_Os03g18630;LOC_Os02g03750;LOC_Os02g51040;LOC_Os03g19600;LOC_Os03g21820;LOC_Os01g18170;LOC_Os01g14850;LOC_Os02g52010;LOC_Os02g52040;LOC_Os11g33270;LOC_Os03g12140;LOC_Os12g08920;LOC_Os04g24620;LOC_Os10g20890;LOC_Os01g…
GO:0005943	phosphatidylinositol 3-kinase complex, class IA	Cellular Component	1	1	0.0118607	LOC_Os09g34140
GO:1990077	primosome complex	Cellular Component	1	1	0.0118607	LOC_Os05g29010
GO:0008289	lipid binding	Molecular Function	4	1	0.0121188	LOC_Os10g20890;LOC_Os07g07860;LOC_Os12g02300;LOC_Os05g40010
GO:0004650	polygalacturonase activity	Molecular Function	3	1	0.0136864	LOC_Os06g28670;LOC_Os05g50960;LOC_Os02g03750
GO:0019825	oxygen binding	Molecular Function	4	1	0.014427	LOC_Os05g37250;LOC_Os02g47470;LOC_Os06g02019;LOC_Os05g11130
GO:0005089	Rho guanyl-nucleotide exchange factor activity	Molecular Function	2	1	0.0150089	LOC_Os01g62990;LOC_Os04g47170
GO:0015114	phosphate ion transmembrane transporter activity	Molecular Function	2	1	0.0150089	LOC_Os06g29790;LOC_Os02g56510
GO:0005875	microtubule associated complex	Cellular Component	2	1	0.0150827	LOC_Os12g42160;LOC_Os12g39980
GO:0008419	RNA lariat debranching enzyme activity	Molecular Function	1	1	0.0187384	LOC_Os03g51530
GO:0050242	pyruvate, phosphate dikinase activity	Molecular Function	1	1	0.0187384	LOC_Os05g33570
GO:0051777	ent-kaurenoate oxidase activity	Molecular Function	1	1	0.0187384	LOC_Os06g02019
GO:0080013	(E,E)-geranyllinalool synthase activity	Molecular Function	1	1	0.0187384	LOC_Os05g44210
GO:0005275	amine transmembrane transporter activity	Molecular Function	2	1	0.0196193	LOC_Os04g56470;LOC_Os01g41420
GO:0046872	metal ion binding	Molecular Function	24	1	0.0203493	LOC_Os09g31019;LOC_Os03g05210;LOC_Os03g18640;LOC_Os10g40660;LOC_Os01g61900;LOC_Os12g08920;LOC_Os05g03760;LOC_Os05g37250;LOC_Os01g22352;LOC_Os04g56230;LOC_Os03g60570;LOC_Os03g30150;LOC_Os01g09660;LOC_Os01g47700;LOC_Os01g68730;LOC_Os10g28630;LOC_Os05g33570;LOC_Os03g64340;LOC_Os03g05250;LOC_Os03g15340;LOC_Os08g03180;LOC_Os03g11540;LOC_Os01g56940;LOC_Os02g47920
GO:0005199	structural constituent of cell wall	Molecular Function	3	1	0.0216666	LOC_Os07g37385;LOC_Os03g21820;LOC_Os02g51040
GO:0043232	intracellular non-membrane-bounded organelle	Cellular Component	7	1	0.023561	LOC_Os09g11440;LOC_Os08g03180;LOC_Os04g07150;LOC_Os08g06600;LOC_Os02g35329;LOC_Os03g05210;LOC_Os04g40560
GO:0001673	male germ cell nucleus	Cellular Component	1	1	0.023581	LOC_Os12g40860
GO:0004871	signal transducer activity	Molecular Function	4	1	0.0236029	LOC_Os12g35670;LOC_Os12g41910;LOC_Os11g02610;LOC_Os01g74146
GO:0072686	mitotic spindle	Cellular Component	2	1	0.025389	LOC_Os01g49200;LOC_Os05g33890
GO:0000775	chromosome, centromeric region	Cellular Component	2	1	0.0277124	LOC_Os08g06600;LOC_Os10g31930
GO:0045486	naringenin 3-dioxygenase activity	Molecular Function	1	1	0.0279759	LOC_Os04g49210
GO:0043023	ribosomal large subunit binding	Molecular Function	1	1	0.0279759	LOC_Os01g17330
GO:0031418	L-ascorbic acid binding	Molecular Function	2	1	0.0284255	LOC_Os09g27750;LOC_Os09g27820
GO:0004620	phospholipase activity	Molecular Function	2	1	0.0303445	LOC_Os06g46350;LOC_Os08g37180
GO:0052716	hydroquinone	Molecular Function	2	1	0.0303445	LOC_Os03g18640;LOC_Os11g01730
GO:0042299	lupeol synthase activity	Molecular Function	2	1	0.0303445	LOC_Os11g37700;LOC_Os09g16449
GO:0005618	cell wall	Cellular Component	31	1	0.0306117	LOC_Os04g47170;LOC_Os05g43110;LOC_Os03g21820;LOC_Os04g17650;LOC_Os06g47600;LOC_Os01g33080;LOC_Os09g26360;LOC_Os06g28670;LOC_Os11g31940;LOC_Os06g50400;LOC_Os09g27820;LOC_Os06g21230;LOC_Os08g33100;LOC_Os09g27750;LOC_Os07g06460;LOC_Os09g02270;LOC_Os01g71820;LOC_Os07g37385;LOC_Os10g25230;LOC_Os01g68730;LOC_Os10g25400;LOC_Os12g43490;LOC_Os11g07830;LOC_Os04g16740;LOC_Os06g11730;LOC_Os03g47620;LOC_Os03g…
GO:0033799	myricetin 3'-O-methyltransferase activity	Molecular Function	2	1	0.0343311	LOC_Os04g01470;LOC_Os10g02840
GO:0005662	DNA replication factor A complex	Cellular Component	1	1	0.0351628	LOC_Os03g11540
GO:0008622	epsilon DNA polymerase complex	Cellular Component	1	1	0.0351628	LOC_Os02g30800
GO:0000796	condensin complex	Cellular Component	1	1	0.0351628	LOC_Os07g46540
GO:0019897	extrinsic component of plasma membrane	Cellular Component	1	1	0.0351628	LOC_Os04g52950
GO:0000325	plant-type vacuole	Cellular Component	4	1	0.0355074	LOC_Os02g07870;LOC_Os01g41990;LOC_Os01g59840;LOC_Os06g13210
GO:0047763	caffeate O-methyltransferase activity	Molecular Function	1	1	0.0371267	LOC_Os04g01470
GO:0008898	S-adenosylmethionine-homocysteine S-methyltransferase activity	Molecular Function	1	1	0.0371267	LOC_Os10g28630
GO:0004748	ribonucleoside-diphosphate reductase activity, thioredoxin disulfide as acceptor	Molecular Function	1	1	0.0371267	LOC_Os06g03720
GO:0016205	selenocysteine methyltransferase activity	Molecular Function	1	1	0.0371267	LOC_Os10g28630
GO:0005261	cation channel activity	Molecular Function	1	1	0.0371267	LOC_Os01g57370
GO:0004764	shikimate 3-dehydrogenase (NADP+) activity	Molecular Function	1	1	0.0371267	LOC_Os01g27760
GO:0005856	cytoskeleton	Cellular Component	3	1	0.03897	LOC_Os08g44420;LOC_Os05g50680;LOC_Os05g46760
GO:0031225	anchored component of membrane	Cellular Component	6	1	0.0390631	LOC_Os07g07860;LOC_Os03g15340;LOC_Os09g30160;LOC_Os02g16500;LOC_Os03g15790;LOC_Os06g28670
GO:0016887	ATPase activity	Molecular Function	6	1	0.0402498	LOC_Os11g37700;LOC_Os01g47510;LOC_Os09g16449;LOC_Os02g21340;LOC_Os03g02290;LOC_Os12g39980
GO:0016301	kinase activity	Molecular Function	17	1	0.0411091	LOC_Os12g02710;LOC_Os02g41510;LOC_Os03g05440;LOC_Os01g68730;LOC_Os05g33570;LOC_Os04g12540;LOC_Os03g45720;LOC_Os09g38910;LOC_Os08g25690;LOC_Os08g06600;LOC_Os01g52140;LOC_Os11g14140;LOC_Os06g17490;LOC_Os01g33040;LOC_Os11g35860;LOC_Os10g20770;LOC_Os01g55100
GO:0043565	sequence-specific DNA binding	Molecular Function	11	1	0.0421218	LOC_Os01g64020;LOC_Os05g02150;LOC_Os11g04380;LOC_Os01g60600;LOC_Os02g43940;LOC_Os02g45420;LOC_Os02g08440;LOC_Os01g09100;LOC_Os10g40810;LOC_Os01g36220;LOC_Os07g39820
GO:0003855	3-dehydroquinate dehydratase activity	Molecular Function	1	1	0.0461916	LOC_Os01g27760
GO:0004367	glycerol-3-phosphate dehydrogenase [NAD+] activity	Molecular Function	1	1	0.0461916	LOC_Os01g71280
GO:0004566	beta-glucuronidase activity	Molecular Function	1	1	0.0461916	LOC_Os06g08090
GO:0030755	quercetin 3-O-methyltransferase activity	Molecular Function	1	1	0.0461916	LOC_Os04g01470
GO:0003896	DNA primase activity	Molecular Function	1	1	0.0461916	LOC_Os05g29010
GO:0052748	baicalin beta-D-glucuronidase activity	Molecular Function	1	1	0.0461916	LOC_Os06g08090
GO:0042406	extrinsic component of endoplasmic reticulum membrane	Cellular Component	1	1	0.0466076	LOC_Os03g10310
GO:0047800	cysteamine dioxygenase activity	Molecular Function	2	1	0.0474029	LOC_Os12g42860;LOC_Os08g37470
GO:0008408	3'-5' exonuclease activity	Molecular Function	2	1	0.0474029	LOC_Os04g58810;LOC_Os08g34170
GO:0004540	ribonuclease activity	Molecular Function	2	1	0.0497328	LOC_Os04g58810;LOC_Os08g34170
GO:0046961	proton-transporting ATPase activity, rotational mechanism	Molecular Function	2	1	0.0545133	LOC_Os04g16740;LOC_Os02g07870
GO:0071771	aldehyde decarbonylase activity	Molecular Function	1	1	0.0551714	LOC_Os02g29640
GO:0030332	cyclin binding	Molecular Function	1	1	0.0551714	LOC_Os09g28580
GO:2001080	chitosan binding	Molecular Function	1	1	0.0551714	LOC_Os01g53840
GO:0019789	SUMO transferase activity	Molecular Function	1	1	0.0551714	LOC_Os04g49130
GO:0016810	hydrolase activity, acting on carbon-nitrogen (but not peptide) bonds	Molecular Function	1	1	0.0551714	LOC_Os06g10420
GO:0005337	nucleoside transmembrane transporter activity	Molecular Function	1	1	0.0551714	LOC_Os07g37110
GO:0044421	extracellular region part	Cellular Component	1	1	0.057917	LOC_Os01g71820
GO:0033597	mitotic checkpoint complex	Cellular Component	1	1	0.057917	LOC_Os01g74146
GO:0008092	cytoskeletal protein binding	Molecular Function	2	1	0.0619715	LOC_Os04g31940;LOC_Os05g38480
GO:0004356	glutamate-ammonia ligase activity	Molecular Function	1	1	0.0640669	LOC_Os03g12290
GO:0004034	aldose 1-epimerase activity	Molecular Function	1	1	0.0640669	LOC_Os04g38530
GO:0004058	aromatic-L-amino-acid decarboxylase activity	Molecular Function	1	1	0.0640669	LOC_Os01g56380
GO:1990055	phenylacetaldehyde synthase activity	Molecular Function	1	1	0.0640669	LOC_Os01g56380
GO:0004837	tyrosine decarboxylase activity	Molecular Function	1	1	0.0640669	LOC_Os01g56380
GO:0010295	(+)-abscisic acid 8'-hydroxylase activity	Molecular Function	1	1	0.0640669	LOC_Os02g47470
GO:0004462	lactoylglutathione lyase activity	Molecular Function	1	1	0.0640669	LOC_Os03g45720
GO:0004185	serine-type carboxypeptidase activity	Molecular Function	3	1	0.0670908	LOC_Os09g28840;LOC_Os01g61690;LOC_Os02g26480
GO:0018685	alkane 1-monooxygenase activity	Molecular Function	2	1	0.0671246	LOC_Os05g37250;LOC_Os06g03930
GO:0004872	receptor activity	Molecular Function	2	1	0.0671246	LOC_Os06g36670;LOC_Os02g08320
GO:0044422	organelle part	Cellular Component	1	1	0.0690926	LOC_Os06g03930
GO:0033180	proton-transporting V-type ATPase, V1 domain	Cellular Component	1	1	0.0690926	LOC_Os02g07870
GO:0009331	glycerol-3-phosphate dehydrogenase complex	Cellular Component	1	1	0.0690926	LOC_Os01g71280
GO:0017091	AU-rich element binding	Molecular Function	1	1	0.072879	LOC_Os06g11730
GO:0003886	DNA (cytosine-5-)-methyltransferase activity	Molecular Function	1	1	0.072879	LOC_Os10g01570
GO:0016157	sucrose synthase activity	Molecular Function	1	1	0.072879	LOC_Os04g17650
GO:0004476	mannose-6-phosphate isomerase activity	Molecular Function	1	1	0.072879	LOC_Os01g03710
GO:0004337	geranyltranstransferase activity	Molecular Function	1	1	0.072879	LOC_Os04g56230
GO:0046906	tetrapyrrole binding	Molecular Function	1	1	0.072879	LOC_Os03g47620
GO:0042389	omega-3 fatty acid desaturase activity	Molecular Function	1	1	0.072879	LOC_Os03g18070
GO:0004321	fatty-acyl-CoA synthase activity	Molecular Function	1	1	0.072879	LOC_Os10g42800
GO:0018456	aryl-alcohol dehydrogenase (NAD+) activity	Molecular Function	1	1	0.072879	LOC_Os09g23560
GO:0019199	transmembrane receptor protein kinase activity	Molecular Function	3	1	0.0770321	LOC_Os01g33950;LOC_Os01g53840;LOC_Os11g45540
GO:0031981	nuclear lumen	Cellular Component	11	1	0.0784161	LOC_Os08g36570;LOC_Os05g46760;LOC_Os02g07110;LOC_Os08g03180;LOC_Os08g31850;LOC_Os01g36220;LOC_Os04g07150;LOC_Os02g08320;LOC_Os03g60570;LOC_Os06g04480;LOC_Os10g39850
GO:0010170	glucose-1-phosphate adenylyltransferase complex	Cellular Component	1	1	0.080136	LOC_Os03g52460
GO:0009360	DNA polymerase III complex	Cellular Component	1	1	0.080136	LOC_Os12g10670
GO:0046933	proton-transporting ATP synthase activity, rotational mechanism	Molecular Function	2	1	0.0805891	LOC_Os02g07870;LOC_Os04g16740
GO:0016788	hydrolase activity, acting on ester bonds	Molecular Function	6	1	0.0813929	LOC_Os04g42860;LOC_Os02g52040;LOC_Os05g43110;LOC_Os10g25400;LOC_Os02g52010;LOC_Os11g31940
GO:0016717	oxidoreductase activity, acting on paired donors, with oxidation of a pair of donors resulting in the reduction of molecular oxygen to two molecules of water	Molecular Function	1	1	0.0816083	LOC_Os03g18070
GO:0047681	aryl-alcohol dehydrogenase (NADP+) activity	Molecular Function	1	1	0.0816083	LOC_Os09g23560
GO:0015398	high-affinity secondary active ammonium transmembrane transporter activity	Molecular Function	1	1	0.0816083	LOC_Os05g39240
GO:0008878	glucose-1-phosphate adenylyltransferase activity	Molecular Function	1	1	0.0816083	LOC_Os03g52460
GO:0008812	choline dehydrogenase activity	Molecular Function	1	1	0.0816083	LOC_Os09g19930
GO:0045300	acyl-[acyl-carrier-protein] desaturase activity	Molecular Function	1	1	0.0816083	LOC_Os08g10010
GO:0046029	mannitol dehydrogenase activity	Molecular Function	1	1	0.0816083	LOC_Os09g23560
GO:0018479	benzaldehyde dehydrogenase (NAD+) activity	Molecular Function	1	1	0.0816083	LOC_Os03g57720
GO:0005507	copper ion binding	Molecular Function	10	1	0.0866953	LOC_Os06g46950;LOC_Os06g11730;LOC_Os04g16740;LOC_Os03g15340;LOC_Os09g27750;LOC_Os03g64340;LOC_Os03g18640;LOC_Os09g27820;LOC_Os09g20090;LOC_Os11g01730
GO:0043234	protein complex	Cellular Component	5	1	0.0890745	LOC_Os01g42070;LOC_Os11g10560;LOC_Os01g50420;LOC_Os04g30720;LOC_Os03g05210
GO:0052579	(+)-pulegone reductase, (+)-isomenthone as substrate, activity	Molecular Function	1	1	0.0902556	LOC_Os04g41960
GO:0019139	cytokinin dehydrogenase activity	Molecular Function	1	1	0.0902556	LOC_Os01g71310
GO:0052580	(+)-pulegone reductase, (-)-menthone as substrate, activity	Molecular Function	1	1	0.0902556	LOC_Os04g41960
GO:0030675	Rac GTPase activator activity	Molecular Function	1	1	0.0902556	LOC_Os07g22580
GO:0008519	ammonium transmembrane transporter activity	Molecular Function	1	1	0.0902556	LOC_Os05g39240
GO:0071949	FAD binding	Molecular Function	1	1	0.0902556	LOC_Os03g57720
GO:0050302	indole-3-acetaldehyde oxidase activity	Molecular Function	1	1	0.0902556	LOC_Os03g57720
GO:0010293	abscisic aldehyde oxidase activity	Molecular Function	1	1	0.0902556	LOC_Os03g57720
GO:0004861	cyclin-dependent protein serine/threonine kinase inhibitor activity	Molecular Function	1	1	0.0902556	LOC_Os09g28580
GO:0045735	nutrient reservoir activity	Molecular Function	3	1	0.0949274	LOC_Os08g08960;LOC_Os08g37180;LOC_Os01g18170
GO:0004888	transmembrane signaling receptor activity	Molecular Function	2	1	0.0977251	LOC_Os02g05940;LOC_Os02g05970
GO:0042973	glucan endo-1,3-beta-D-glucosidase activity	Molecular Function	2	1	0.0977251	LOC_Os03g12140;LOC_Os01g71820
GO:0048046	apoplast	Cellular Component	20	1	0.098307	LOC_Os02g16940;LOC_Os03g06290;LOC_Os02g07870;LOC_Os11g01730;LOC_Os08g08960;LOC_Os02g30800;LOC_Os05g46760;LOC_Os01g50410;LOC_Os12g43490;LOC_Os06g11730;LOC_Os01g71820;LOC_Os11g33270;LOC_Os09g23560;LOC_Os06g21230;LOC_Os01g50420;LOC_Os01g22352;LOC_Os12g08920;LOC_Os01g18170;LOC_Os06g47600;LOC_Os03g18640
GO:0008509	anion transmembrane transporter activity	Molecular Function	1	1	0.0988218	LOC_Os06g13210
GO:0030744	luteolin O-methyltransferase activity	Molecular Function	1	1	0.0988218	LOC_Os04g01470
GO:0016207	4-coumarate-CoA ligase activity	Molecular Function	1	1	0.0988218	LOC_Os10g42800
GO:0030414	peptidase inhibitor activity	Molecular Function	1	1	0.0988218	LOC_Os11g18660
GO:0005834	heterotrimeric G-protein complex	Cellular Component	2	1	0.0996055	LOC_Os01g74146;LOC_Os04g40560
GO:0005179	hormone activity	Molecular Function	1	1	0.107308	LOC_Os12g35670
GO:0016799	hydrolase activity, hydrolyzing N-glycosyl compounds	Molecular Function	1	1	0.107308	LOC_Os03g49050
GO:0047617	acyl-CoA hydrolase activity	Molecular Function	1	1	0.107308	LOC_Os06g46350
GO:0001653	peptide receptor activity	Molecular Function	2	1	0.109665	LOC_Os02g05940;LOC_Os02g05970
GO:0016161	beta-amylase activity	Molecular Function	2	1	0.109665	LOC_Os11g12620;LOC_Os08g05290
GO:0020037	heme binding	Molecular Function	11	1	0.111473	LOC_Os05g11130;LOC_Os01g47700;LOC_Os05g37250;LOC_Os01g22352;LOC_Os03g25490;LOC_Os12g08920;LOC_Os03g04530;LOC_Os06g02019;LOC_Os02g47470;LOC_Os10g39870;LOC_Os06g03930
GO:0042995	cell projection	Cellular Component	1	1	0.112489	LOC_Os04g30720
GO:0005720	nuclear heterochromatin	Cellular Component	1	1	0.112489	LOC_Os08g30850
GO:0043621	protein self-association	Molecular Function	3	1	0.114343	LOC_Os08g05290;LOC_Os11g12620;LOC_Os01g53840
GO:0042626	ATPase activity, coupled to transmembrane movement of substances	Molecular Function	3	1	0.114343	LOC_Os02g21340;LOC_Os11g37700;LOC_Os09g16449
GO:0005222	intracellular cAMP activated cation channel activity	Molecular Function	1	1	0.115714	LOC_Os01g57370
GO:0004357	glutamate-cysteine ligase activity	Molecular Function	1	1	0.115714	LOC_Os09g23560
GO:0080133	midchain alkane hydroxylase activity	Molecular Function	1	1	0.124041	LOC_Os03g04530
GO:0004864	protein phosphatase inhibitor activity	Molecular Function	1	1	0.124041	LOC_Os06g36670
GO:0046593	mandelonitrile lyase activity	Molecular Function	1	1	0.124041	LOC_Os09g19930
GO:0004161	dimethylallyltranstransferase activity	Molecular Function	1	1	0.124041	LOC_Os04g56230
GO:0031624	ubiquitin conjugating enzyme binding	Molecular Function	1	1	0.124041	LOC_Os04g48260
GO:0003825	alpha,alpha-trehalose-phosphate synthase (UDP-forming) activity	Molecular Function	1	1	0.124041	LOC_Os05g44210
GO:0010283	pinoresinol reductase activity	Molecular Function	1	1	0.124041	LOC_Os01g13610
GO:0010284	lariciresinol reductase activity	Molecular Function	1	1	0.124041	LOC_Os01g13610
GO:0031625	ubiquitin protein ligase binding	Molecular Function	4	1	0.125734	LOC_Os07g26660;LOC_Os01g02750;LOC_Os11g45540;LOC_Os03g57720
GO:0044446	intracellular organelle part	Cellular Component	23	1	0.128137	LOC_Os10g39870;LOC_Os10g25290;LOC_Os08g06600;LOC_Os01g33080;LOC_Os01g52570;LOC_Os11g14140;LOC_Os04g40560;LOC_Os03g05210;LOC_Os02g42560;LOC_Os02g56510;LOC_Os03g30150;LOC_Os01g62670;LOC_Os07g29190;LOC_Os07g42250;LOC_Os04g53930;LOC_Os03g51390;LOC_Os06g05940;LOC_Os03g64340;LOC_Os02g34640;LOC_Os01g72360;LOC_Os01g03710;LOC_Os03g04530;LOC_Os02g55190
GO:0042802	identical protein binding	Molecular Function	8	1	0.13063	LOC_Os07g48760;LOC_Os09g36740;LOC_Os01g62990;LOC_Os01g61900;LOC_Os04g47170;LOC_Os04g52090;LOC_Os03g06290;LOC_Os02g16940
GO:0033800	isoflavone 7-O-methyltransferase activity	Molecular Function	1	1	0.13229	LOC_Os10g02840
GO:0046983	protein dimerization activity	Molecular Function	13	1	0.132745	LOC_Os01g13520;LOC_Os03g51910;LOC_Os07g43120;LOC_Os10g02840;LOC_Os02g55250;LOC_Os06g41060;LOC_Os04g23550;LOC_Os05g33890;LOC_Os03g53020;LOC_Os04g01470;LOC_Os01g49200;LOC_Os08g42470;LOC_Os04g47810
GO:0045298	tubulin complex	Cellular Component	1	1	0.133424	LOC_Os03g01530
GO:0010427	abscisic acid binding	Molecular Function	1	1	0.140461	LOC_Os06g36670
GO:0016614	oxidoreductase activity, acting on CH-OH group of donors	Molecular Function	1	1	0.140461	LOC_Os03g57720
GO:0008195	phosphatidate phosphatase activity	Molecular Function	1	1	0.140461	LOC_Os01g47580
GO:0005543	phospholipid binding	Molecular Function	2	1	0.14099	LOC_Os10g41060;LOC_Os08g32920
GO:0016874	ligase activity	Molecular Function	3	1	0.141579	LOC_Os06g09310;LOC_Os02g33680;LOC_Os10g42800
GO:0003678	DNA helicase activity	Molecular Function	3	1	0.141579	LOC_Os02g55410;LOC_Os08g41070;LOC_Os12g37400
GO:0030145	manganese ion binding	Molecular Function	2	1	0.14422	LOC_Os01g18170;LOC_Os08g08960
GO:0033612	receptor serine/threonine kinase binding	Molecular Function	2	1	0.14422	LOC_Os08g05290;LOC_Os11g12620
GO:0016746	transferase activity, transferring acyl groups	Molecular Function	2	1	0.14422	LOC_Os02g52040;LOC_Os02g52010
GO:0008171	O-methyltransferase activity	Molecular Function	2	1	0.14422	LOC_Os04g01470;LOC_Os10g02840
GO:0015112	nitrate transmembrane transporter activity	Molecular Function	2	1	0.147466	LOC_Os02g46460;LOC_Os05g27010
GO:0015334	high-affinity oligopeptide transporter activity	Molecular Function	2	1	0.147466	LOC_Os02g46460;LOC_Os05g27010
GO:0043546	molybdopterin cofactor binding	Molecular Function	1	1	0.148556	LOC_Os03g57720
GO:0005929	cilium	Cellular Component	1	1	0.153867	LOC_Os05g38480
GO:0042937	tripeptide transporter activity	Molecular Function	2	1	0.154003	LOC_Os05g27010;LOC_Os02g46460
GO:0015020	glucuronosyltransferase activity	Molecular Function	1	1	0.156575	LOC_Os02g51910
GO:0035174	histone serine kinase activity	Molecular Function	1	1	0.156575	LOC_Os01g50420
GO:0030983	mismatched DNA binding	Molecular Function	1	1	0.156575	LOC_Os08g44360
GO:0042936	dipeptide transporter activity	Molecular Function	2	1	0.157292	LOC_Os05g27010;LOC_Os02g46460
GO:0046608	carotenoid isomerase activity	Molecular Function	2	1	0.160594	LOC_Os06g11730;LOC_Os06g21230
GO:0010005	cortical microtubule, transverse to long axis	Cellular Component	2	1	0.163322	LOC_Os01g49200;LOC_Os05g33890
GO:0016706	oxidoreductase activity, acting on paired donors, with incorporation or reduction of molecular oxygen, 2-oxoglutarate as one donor, and incorporation of one atom each of oxygen into both donors	Molecular Function	3	1	0.163847	LOC_Os04g49210;LOC_Os09g27750;LOC_Os09g27820
GO:0003950	NAD+ ADP-ribosyltransferase activity	Molecular Function	1	1	0.164519	LOC_Os03g15790
GO:0016752	sinapoyltransferase activity	Molecular Function	1	1	0.164519	LOC_Os02g26480
GO:0004784	superoxide dismutase activity	Molecular Function	1	1	0.164519	LOC_Os01g18170
GO:0031969	chloroplast membrane	Cellular Component	2	1	0.171733	LOC_Os03g18070;LOC_Os03g21000
GO:0042277	peptide binding	Molecular Function	1	1	0.172388	LOC_Os05g07820
GO:0047203	13-hydroxylupinine O-tigloyltransferase activity	Molecular Function	1	1	0.172388	LOC_Os01g41420
GO:0097014	ciliary cytoplasm	Cellular Component	1	1	0.173829	LOC_Os12g39980
GO:0015297	antiporter activity	Molecular Function	2	1	0.177284	LOC_Os11g04380;LOC_Os04g48290
GO:0042054	histone methyltransferase activity	Molecular Function	1	1	0.180183	LOC_Os08g30850
GO:0052747	sinapyl alcohol dehydrogenase activity	Molecular Function	1	1	0.180183	LOC_Os09g23560
GO:0047274	galactinol-sucrose galactosyltransferase activity	Molecular Function	1	1	0.180183	LOC_Os12g02200
GO:0009574	preprophase band	Cellular Component	2	1	0.180213	LOC_Os01g49200;LOC_Os05g33890
GO:0009531	secondary cell wall	Cellular Component	1	1	0.183634	LOC_Os07g22580
GO:0038023	signaling receptor activity	Molecular Function	2	1	0.184035	LOC_Os01g48570;LOC_Os05g07820
GO:0004527	exonuclease activity	Molecular Function	2	1	0.184035	LOC_Os02g47920;LOC_Os01g56940
GO:0016604	nuclear body	Cellular Component	2	1	0.184477	LOC_Os09g28440;LOC_Os03g45720
GO:0005819	spindle	Cellular Component	3	1	0.185735	LOC_Os01g49200;LOC_Os05g33890;LOC_Os07g32390
GO:0044428	nuclear part	Cellular Component	10	1	0.185826	LOC_Os03g04550;LOC_Os06g46995;LOC_Os10g20770;LOC_Os03g24730;LOC_Os01g40070;LOC_Os06g03050;LOC_Os09g11440;LOC_Os06g04699;LOC_Os06g03720;LOC_Os03g15790
GO:0045551	cinnamyl-alcohol dehydrogenase activity	Molecular Function	1	1	0.187904	LOC_Os09g23560
GO:0030234	enzyme regulator activity	Molecular Function	1	1	0.187904	LOC_Os06g46950
GO:0030746	isoflavone 4'-O-methyltransferase activity	Molecular Function	1	1	0.187904	LOC_Os10g02840
GO:0005338	nucleotide-sugar transmembrane transporter activity	Molecular Function	1	1	0.187904	LOC_Os11g04380
GO:0033946	xyloglucan-specific endo-beta-1,4-glucanase activity	Molecular Function	1	1	0.187904	LOC_Os11g33270
GO:0080039	xyloglucan endotransglucosylase activity	Molecular Function	1	1	0.187904	LOC_Os11g33270
GO:0005506	iron ion binding	Molecular Function	9	1	0.195202	LOC_Os03g04530;LOC_Os06g02019;LOC_Os03g25490;LOC_Os05g37250;LOC_Os05g11130;LOC_Os06g03930;LOC_Os11g07912;LOC_Os02g47470;LOC_Os03g57720
GO:0080067	4-methylthiobutyl-desulfoglucosinolate sulfotransferase activity	Molecular Function	1	1	0.195554	LOC_Os12g17160
GO:0080071	indol-3-yl-methyl-desulfoglucosinolate sulfotransferase activity	Molecular Function	1	1	0.195554	LOC_Os12g17160
GO:0080069	7-methylthioheptyl-desulfoglucosinolate sulfotransferase activity	Molecular Function	1	1	0.195554	LOC_Os12g17160
GO:0080068	5-methylthiopentyl-desulfoglucosinolate sulfotransferase activity	Molecular Function	1	1	0.195554	LOC_Os12g17160
GO:0080070	8-methylthiooctyl-desulfoglucosinolate sulfotransferase activity	Molecular Function	1	1	0.195554	LOC_Os12g17160
GO:0080066	3-methylthiopropyl-desulfoglucosinolate sulfotransferase activity	Molecular Function	1	1	0.195554	LOC_Os12g17160
GO:0030551	cyclic nucleotide binding	Molecular Function	1	1	0.195554	LOC_Os01g57370
GO:0005215	transporter activity	Molecular Function	5	1	0.199802	LOC_Os01g47510;LOC_Os05g40010;LOC_Os07g26660;LOC_Os06g13210;LOC_Os05g27010
GO:0030761	8-hydroxyquercitin 8-O-methyltransferase activity	Molecular Function	1	1	0.203131	LOC_Os10g02840
GO:0015399	primary active transmembrane transporter activity	Molecular Function	1	1	0.203131	LOC_Os04g56470
GO:0080045	quercetin 3'-O-glucosyltransferase activity	Molecular Function	1	1	0.203131	LOC_Os01g53430
GO:0046975	histone methyltransferase activity (H3-K36 specific)	Molecular Function	2	1	0.20449	LOC_Os06g11730;LOC_Os06g21230
GO:0042803	protein homodimerization activity	Molecular Function	6	1	0.207376	LOC_Os01g53840;LOC_Os10g02840;LOC_Os06g36670;LOC_Os03g49050;LOC_Os06g21230;LOC_Os06g11730
GO:0005262	calcium channel activity	Molecular Function	1	1	0.210638	LOC_Os01g57370
GO:0080131	hydroxyjasmonate sulfotransferase activity	Molecular Function	1	1	0.210638	LOC_Os12g17160
GO:0008422	beta-glucosidase activity	Molecular Function	1	1	0.210638	LOC_Os01g59840
GO:0004602	glutathione peroxidase activity	Molecular Function	1	1	0.210638	LOC_Os04g58720
GO:0009506	plasmodesma	Cellular Component	38	1	0.210872	LOC_Os11g37700;LOC_Os03g25490;LOC_Os12g08920;LOC_Os05g33890;LOC_Os03g12140;LOC_Os04g24620;LOC_Os06g21230;LOC_Os02g45940;LOC_Os07g26660;LOC_Os02g21340;LOC_Os05g27010;LOC_Os01g14850;LOC_Os02g06930;LOC_Os08g36570;LOC_Os01g33040;LOC_Os02g51040;LOC_Os02g07870;LOC_Os04g39110;LOC_Os03g14140;LOC_Os03g47620;LOC_Os11g30500;LOC_Os04g49420;LOC_Os02g41510;LOC_Os01g22352;LOC_Os10g20890;LOC_Os04g01470;LOC_Os02g…
GO:0018024	histone-lysine N-methyltransferase activity	Molecular Function	2	1	0.211365	LOC_Os01g68730;LOC_Os08g30850
GO:0046658	anchored component of plasma membrane	Cellular Component	4	1	0.216717	LOC_Os02g03750;LOC_Os07g37150;LOC_Os03g12140;LOC_Os05g40200
GO:0004553	hydrolase activity, hydrolyzing O-glycosyl compounds	Molecular Function	6	1	0.217731	LOC_Os01g71690;LOC_Os12g02200;LOC_Os01g47510;LOC_Os03g12140;LOC_Os11g33270;LOC_Os06g28670
GO:0043022	ribosome binding	Molecular Function	1	1	0.218073	LOC_Os01g17330
GO:0052694	jasmonoyl-isoleucine-12-hydroxylase activity	Molecular Function	1	1	0.218073	LOC_Os05g37250
GO:0004180	carboxypeptidase activity	Molecular Function	1	1	0.218073	LOC_Os09g28840
GO:0044424	intracellular part	Cellular Component	9	1	0.220013	LOC_Os01g02740;LOC_Os11g10560;LOC_Os06g04230;LOC_Os12g17160;LOC_Os03g05250;LOC_Os01g10490;LOC_Os07g43120;LOC_Os02g15820;LOC_Os02g33680
GO:0003697	single-stranded DNA binding	Molecular Function	3	1	0.220868	LOC_Os06g11730;LOC_Os06g21230;LOC_Os01g71690
GO:0045261	proton-transporting ATP synthase complex, catalytic core F(1)	Cellular Component	1	1	0.221704	LOC_Os04g16740
GO:0016831	carboxy-lyase activity	Molecular Function	1	1	0.225439	LOC_Os01g56380
GO:1990135	flavonoid sulfotransferase activity	Molecular Function	1	1	0.225439	LOC_Os12g17160
GO:0002020	protease binding	Molecular Function	1	1	0.225439	LOC_Os02g07870
GO:0030766	11-O-demethyl-17-O-deacetylvindoline O-methyltransferase activity	Molecular Function	1	1	0.232736	LOC_Os10g02840
GO:0042800	histone methyltransferase activity (H3-K4 specific)	Molecular Function	2	1	0.235581	LOC_Os06g11730;LOC_Os06g21230
GO:0016758	transferase activity, transferring hexosyl groups	Molecular Function	6	1	0.237408	LOC_Os02g51910;LOC_Os01g53430;LOC_Os07g32010;LOC_Os01g59840;LOC_Os03g04720;LOC_Os05g08750
GO:0080118	brassinosteroid sulfotransferase activity	Molecular Function	1	1	0.239964	LOC_Os12g17160
GO:0015078	hydrogen ion transmembrane transporter activity	Molecular Function	1	1	0.239964	LOC_Os02g24598
GO:0050062	long-chain-fatty-acyl-CoA reductase activity	Molecular Function	1	1	0.239964	LOC_Os08g44360
GO:0031982	vesicle	Cellular Component	1	1	0.24007	LOC_Os11g06730
GO:0005876	spindle microtubule	Cellular Component	1	1	0.24007	LOC_Os03g02290
GO:0005615	extracellular space	Cellular Component	2	1	0.240897	LOC_Os01g71310;LOC_Os01g61690
GO:0016621	cinnamoyl-CoA reductase activity	Molecular Function	2	1	0.246011	LOC_Os06g11730;LOC_Os06g21230
GO:0008081	phosphoric diester hydrolase activity	Molecular Function	1	1	0.247125	LOC_Os09g36520
GO:0015172	acidic amino acid transmembrane transporter activity	Molecular Function	1	1	0.247125	LOC_Os04g56470
GO:0046914	transition metal ion binding	Molecular Function	3	1	0.253246	LOC_Os06g21230;LOC_Os08g10010;LOC_Os06g03720
GO:0016762	xyloglucan	Molecular Function	1	1	0.254218	LOC_Os11g33270
GO:0008907	integrase activity	Molecular Function	1	1	0.254218	LOC_Os01g02740
GO:0009922	fatty acid elongase activity	Molecular Function	1	1	0.254218	LOC_Os06g39750
GO:0016844	strictosidine synthase activity	Molecular Function	1	1	0.261244	LOC_Os07g42250
GO:0008131	primary amine oxidase activity	Molecular Function	1	1	0.261244	LOC_Os01g71310
GO:0005200	structural constituent of cytoskeleton	Molecular Function	1	1	0.261244	LOC_Os03g01530
GO:0016671	oxidoreductase activity, acting on a sulfur group of donors, disulfide as acceptor	Molecular Function	1	1	0.261244	LOC_Os03g21000
GO:0005242	inward rectifier potassium channel activity	Molecular Function	1	1	0.261244	LOC_Os01g57370
GO:0032440	2-alkenal reductase [NAD(P)] activity	Molecular Function	1	1	0.268205	LOC_Os04g41960
GO:0080019	fatty-acyl-CoA reductase (alcohol-forming) activity	Molecular Function	1	1	0.2751	LOC_Os08g44360
GO:0030176	integral component of endoplasmic reticulum membrane	Cellular Component	1	1	0.275516	LOC_Os03g47620
GO:0015175	neutral amino acid transmembrane transporter activity	Molecular Function	1	1	0.28193	LOC_Os04g56470
GO:0034639	L-amino acid efflux transmembrane transporter activity	Molecular Function	1	1	0.28193	LOC_Os12g33300
GO:0016829	lyase activity	Molecular Function	2	1	0.284324	LOC_Os09g19930;LOC_Os03g49050
GO:0008395	steroid hydroxylase activity	Molecular Function	1	1	0.288697	LOC_Os03g25490
GO:0035251	UDP-glucosyltransferase activity	Molecular Function	2	1	0.294756	LOC_Os05g08750;LOC_Os07g32010
GO:0050897	cobalt ion binding	Molecular Function	2	1	0.294756	LOC_Os01g44360;LOC_Os04g16740
GO:0015250	water channel activity	Molecular Function	1	1	0.295399	LOC_Os07g26660
GO:0070402	NADPH binding	Molecular Function	1	1	0.295399	LOC_Os04g41960
GO:0009705	plant-type vacuole membrane	Cellular Component	5	1	0.300669	LOC_Os07g48760;LOC_Os04g53930;LOC_Os02g46460;LOC_Os12g33300;LOC_Os05g27010
GO:0004713	protein tyrosine kinase activity	Molecular Function	4	1	0.302481	LOC_Os01g53840;LOC_Os11g12620;LOC_Os02g35760;LOC_Os01g02750
GO:0030246	carbohydrate binding	Molecular Function	4	1	0.306701	LOC_Os04g38530;LOC_Os11g10560;LOC_Os06g17490;LOC_Os11g45540
GO:0030247	polysaccharide binding	Molecular Function	3	1	0.319554	LOC_Os09g38910;LOC_Os11g35860;LOC_Os01g02750
GO:0008762	UDP-N-acetylmuramate dehydrogenase activity	Molecular Function	1	1	0.321586	LOC_Os01g71310
GO:0016791	phosphatase activity	Molecular Function	1	1	0.321586	LOC_Os05g44210
GO:0003924	GTPase activity	Molecular Function	3	1	0.322122	LOC_Os08g32920;LOC_Os03g01530;LOC_Os02g06340
GO:0008146	sulfotransferase activity	Molecular Function	1	1	0.327979	LOC_Os12g17160
GO:0070001	aspartic-type peptidase activity	Molecular Function	1	1	0.327979	LOC_Os05g51220
GO:0005770	late endosome	Cellular Component	1	1	0.333625	LOC_Os12g41910
GO:0015174	basic amino acid transmembrane transporter activity	Molecular Function	1	1	0.340587	LOC_Os04g56470
GO:0015198	oligopeptide transporter activity	Molecular Function	1	1	0.340587	LOC_Os06g13210
GO:0031012	extracellular matrix	Cellular Component	1	1	0.341537	LOC_Os08g08960
GO:0009055	electron carrier activity	Molecular Function	10	1	0.357091	LOC_Os03g04530;LOC_Os06g02019;LOC_Os05g37250;LOC_Os03g25490;LOC_Os05g11130;LOC_Os06g03930;LOC_Os03g15340;LOC_Os03g21000;LOC_Os03g57720;LOC_Os02g47470
GO:0090406	pollen tube	Cellular Component	2	1	0.358658	LOC_Os04g47170;LOC_Os01g62990
GO:0030554	adenyl nucleotide binding	Molecular Function	1	1	0.359057	LOC_Os01g44360
GO:0004518	nuclease activity	Molecular Function	1	1	0.365099	LOC_Os08g44360
GO:0005773	vacuole	Cellular Component	19	1	0.373134	LOC_Os06g47600;LOC_Os01g33080;LOC_Os11g31570;LOC_Os01g57540;LOC_Os01g71310;LOC_Os07g26660;LOC_Os11g31940;LOC_Os04g53930;LOC_Os01g49200;LOC_Os01g61690;LOC_Os03g06670;LOC_Os01g71820;LOC_Os10g25400;LOC_Os12g43490;LOC_Os04g16740;LOC_Os03g01530;LOC_Os04g49130;LOC_Os03g19200;LOC_Os03g61470
GO:0019901	protein kinase binding	Molecular Function	2	1	0.373541	LOC_Os01g53840;LOC_Os02g35760
GO:0003729	mRNA binding	Molecular Function	2	1	0.380242	LOC_Os06g21230;LOC_Os06g11730
GO:0051015	actin filament binding	Molecular Function	1	1	0.388702	LOC_Os01g33080
GO:0030170	pyridoxal phosphate binding	Molecular Function	2	1	0.403451	LOC_Os01g56380;LOC_Os12g08850
GO:0045330	aspartyl esterase activity	Molecular Function	1	1	0.405829	LOC_Os09g26360
GO:0042393	histone binding	Molecular Function	1	1	0.405829	LOC_Os08g30850
GO:0008266	poly(U) RNA binding	Molecular Function	1	1	0.405829	LOC_Os04g16740
GO:0000166	nucleotide binding	Molecular Function	11	1	0.406938	LOC_Os02g05940;LOC_Os02g05970;LOC_Os08g05290;LOC_Os06g11730;LOC_Os05g07820;LOC_Os02g30800;LOC_Os02g21340;LOC_Os06g21230;LOC_Os11g04380;LOC_Os02g06930;LOC_Os04g40560
GO:0005509	calcium ion binding	Molecular Function	7	1	0.420659	LOC_Os09g38910;LOC_Os02g06340;LOC_Os11g35860;LOC_Os10g02680;LOC_Os06g46950;LOC_Os01g72530;LOC_Os01g41990
GO:0004601	peroxidase activity	Molecular Function	3	1	0.423807	LOC_Os01g22352;LOC_Os12g08920;LOC_Os01g47700
GO:0031224	intrinsic component of membrane	Cellular Component	4	1	0.427683	LOC_Os05g42230;LOC_Os05g50960;LOC_Os09g38450;LOC_Os07g49114
GO:0051537	2 iron, 2 sulfur cluster binding	Molecular Function	1	1	0.427922	LOC_Os03g57720
GO:0045177	apical part of cell	Cellular Component	1	1	0.42949	LOC_Os05g40200
GO:0008236	serine-type peptidase activity	Molecular Function	1	1	0.433317	LOC_Os02g16940
GO:0050403	trans-zeatin O-beta-D-glucosyltransferase activity	Molecular Function	1	1	0.433317	LOC_Os02g51910
GO:0015030	Cajal body	Cellular Component	1	1	0.442965	LOC_Os11g03370
GO:0052689	carboxylic ester hydrolase activity	Molecular Function	1	1	0.443953	LOC_Os11g31940
GO:0050502	cis-zeatin O-beta-D-glucosyltransferase activity	Molecular Function	1	1	0.449197	LOC_Os02g51910
GO:0005887	integral component of plasma membrane	Cellular Component	2	1	0.449633	LOC_Os04g56470;LOC_Os01g47580
GO:0004842	ubiquitin-protein transferase activity	Molecular Function	6	1	0.450373	LOC_Os02g33680;LOC_Os09g30160;LOC_Os04g49130;LOC_Os02g35329;LOC_Os05g43610;LOC_Os04g48260
GO:0003690	double-stranded DNA binding	Molecular Function	2	1	0.454854	LOC_Os06g11730;LOC_Os06g21230
GO:0009501	amyloplast	Cellular Component	1	1	0.456122	LOC_Os03g52460
GO:0005743	mitochondrial inner membrane	Cellular Component	2	1	0.465402	LOC_Os04g16740;LOC_Os10g39870
GO:0009526	plastid envelope	Cellular Component	1	1	0.468969	LOC_Os11g04380
GO:0008061	chitin binding	Molecular Function	1	1	0.474684	LOC_Os01g53840
GO:0015238	drug transmembrane transporter activity	Molecular Function	1	1	0.479639	LOC_Os04g48290
GO:0031977	thylakoid lumen	Cellular Component	1	1	0.487675	LOC_Os04g16740
GO:0016798	hydrolase activity, acting on glycosyl bonds	Molecular Function	1	1	0.489408	LOC_Os05g50960
GO:0001072	RNA binding transcription antitermination factor activity	Molecular Function	1	1	0.503721	LOC_Os06g11730
GO:0051536	iron-sulfur cluster binding	Molecular Function	1	1	0.503721	LOC_Os11g07912
GO:0005737	cytoplasm	Cellular Component	18	1	0.512915	LOC_Os02g35760;LOC_Os01g03710;LOC_Os11g02300;LOC_Os01g71820;LOC_Os10g28630;LOC_Os12g37400;LOC_Os01g47580;LOC_Os01g64020;LOC_Os04g01470;LOC_Os05g03760;LOC_Os05g44210;LOC_Os03g12290;LOC_Os02g55410;LOC_Os01g74146;LOC_Os01g56380;LOC_Os04g30720;LOC_Os04g17650;LOC_Os10g02840
GO:0015171	amino acid transmembrane transporter activity	Molecular Function	1	1	0.51304	LOC_Os01g41420
GO:0080046	quercetin 4'-O-glucosyltransferase activity	Molecular Function	1	1	0.517634	LOC_Os01g53430
GO:0009897	external side of plasma membrane	Cellular Component	1	1	0.528806	LOC_Os02g16940
GO:0004672	protein kinase activity	Molecular Function	12	1	0.531339	LOC_Os11g06730;LOC_Os07g49114;LOC_Os06g21230;LOC_Os05g42230;LOC_Os01g33080;LOC_Os07g08360;LOC_Os03g18630;LOC_Os08g05290;LOC_Os12g42860;LOC_Os01g02750;LOC_Os05g40200;LOC_Os06g11730
GO:0004497	monooxygenase activity	Molecular Function	4	1	0.532725	LOC_Os06g02019;LOC_Os03g04530;LOC_Os03g25490;LOC_Os06g03930
GO:0005794	Golgi apparatus	Cellular Component	20	1	0.533713	LOC_Os04g49420;LOC_Os06g11730;LOC_Os01g66110;LOC_Os03g01530;LOC_Os06g29790;LOC_Os02g07870;LOC_Os11g04380;LOC_Os11g07912;LOC_Os02g52010;LOC_Os04g48260;LOC_Os02g56510;LOC_Os05g27010;LOC_Os02g52040;LOC_Os11g33270;LOC_Os02g30610;LOC_Os06g21230;LOC_Os02g46460;LOC_Os02g45940;LOC_Os01g22352;LOC_Os12g08920
GO:0005694	chromosome	Cellular Component	1	1	0.539941	LOC_Os08g30850
GO:0022891	substrate-specific transmembrane transporter activity	Molecular Function	1	1	0.539963	LOC_Os04g53930
GO:0005774	vacuolar membrane	Cellular Component	12	1	0.542816	LOC_Os02g07870;LOC_Os02g45940;LOC_Os01g22352;LOC_Os11g37700;LOC_Os04g48260;LOC_Os03g18630;LOC_Os06g13210;LOC_Os02g21340;LOC_Os01g66110;LOC_Os05g40200;LOC_Os04g49420;LOC_Os09g16449
GO:0008168	methyltransferase activity	Molecular Function	2	1	0.549505	LOC_Os04g48260;LOC_Os01g66110
GO:0005525	GTP binding	Molecular Function	3	1	0.557964	LOC_Os08g32920;LOC_Os02g06340;LOC_Os03g01530
GO:0043424	protein histidine kinase binding	Molecular Function	1	1	0.565402	LOC_Os11g03370
GO:0005198	structural molecule activity	Molecular Function	1	1	0.565402	LOC_Os11g39450
GO:0005515	protein binding	Molecular Function	36	1	0.569463	LOC_Os03g19600;LOC_Os03g21000;LOC_Os01g60600;LOC_Os04g48760;LOC_Os09g11440;LOC_Os01g42070;LOC_Os01g74146;LOC_Os06g46950;LOC_Os12g29330;LOC_Os08g44360;LOC_Os12g42160;LOC_Os01g22352;LOC_Os06g03710;LOC_Os01g50420;LOC_Os01g48570;LOC_Os02g46460;LOC_Os03g64340;LOC_Os04g52950;LOC_Os01g33950;LOC_Os01g68730;LOC_Os07g37385;LOC_Os01g54890;LOC_Os08g18920;LOC_Os05g07820;LOC_Os04g28260;LOC_Os11g02300;LOC_Os03g…
GO:0016410	N-acyltransferase activity	Molecular Function	1	1	0.569503	LOC_Os05g37660
GO:0080044	quercetin 7-O-glucosyltransferase activity	Molecular Function	1	1	0.573566	LOC_Os01g53430
GO:0003779	actin binding	Molecular Function	1	1	0.573566	LOC_Os01g33080
GO:0022625	cytosolic large ribosomal subunit	Cellular Component	2	1	0.577914	LOC_Os09g31019;LOC_Os05g40200
GO:0009534	chloroplast thylakoid	Cellular Component	2	1	0.584551	LOC_Os05g37000;LOC_Os09g34140
GO:0080043	quercetin 3-O-glucosyltransferase activity	Molecular Function	1	1	0.585526	LOC_Os01g53430
GO:0009707	chloroplast outer membrane	Cellular Component	1	1	0.601451	LOC_Os08g03560
GO:0003993	acid phosphatase activity	Molecular Function	1	1	0.604721	LOC_Os01g47580
GO:0050661	NADP binding	Molecular Function	1	1	0.612148	LOC_Os01g27760
GO:0015035	protein disulfide oxidoreductase activity	Molecular Function	1	1	0.612148	LOC_Os03g21000
GO:0071944	cell periphery	Cellular Component	28	1	0.623173	LOC_Os01g09220;LOC_Os09g38450;LOC_Os05g47960;LOC_Os01g03710;LOC_Os06g03720;LOC_Os03g51530;LOC_Os08g25690;LOC_Os01g52140;LOC_Os09g26360;LOC_Os01g09870;LOC_Os11g42170;LOC_Os10g28420;LOC_Os10g39850;LOC_Os01g55100;LOC_Os12g02710;LOC_Os06g51320;LOC_Os03g51390;LOC_Os05g51220;LOC_Os03g08330;LOC_Os09g38910;LOC_Os03g19200;LOC_Os01g70560;LOC_Os03g55830;LOC_Os08g06600;LOC_Os11g02610;LOC_Os12g40860;LOC_Os04g…
GO:0017111	nucleoside-triphosphatase activity	Molecular Function	2	1	0.627248	LOC_Os01g42070;LOC_Os04g30720
GO:0019005	SCF ubiquitin ligase complex	Cellular Component	1	1	0.63347	LOC_Os12g40860
GO:0016709	oxidoreductase activity, acting on paired donors, with incorporation or reduction of molecular oxygen, NAD(P)H as one donor, and incorporation of one atom of oxygen	Molecular Function	1	1	0.633606	LOC_Os05g11130
GO:0009579	thylakoid	Cellular Component	2	1	0.634867	LOC_Os04g49420;LOC_Os02g45940
GO:0016705	oxidoreductase activity, acting on paired donors, with incorporation or reduction of molecular oxygen	Molecular Function	4	1	0.635967	LOC_Os03g04530;LOC_Os06g02019;LOC_Os06g03930;LOC_Os03g25490
GO:0051287	NAD binding	Molecular Function	1	1	0.640492	LOC_Os01g71280
GO:0005789	endoplasmic reticulum membrane	Cellular Component	3	1	0.647593	LOC_Os06g02019;LOC_Os03g18070;LOC_Os02g47470
GO:0016747	transferase activity, transferring acyl groups other than amino-acyl groups	Molecular Function	2	1	0.653029	LOC_Os05g37660;LOC_Os06g39750
GO:0004721	phosphoprotein phosphatase activity	Molecular Function	1	1	0.65388	LOC_Os03g47620
GO:0044212	transcription regulatory region DNA binding	Molecular Function	1	1	0.657148	LOC_Os01g61900
GO:0044444	cytoplasmic part	Cellular Component	31	1	0.661351	LOC_Os12g37400;LOC_Os10g42910;LOC_Os07g32010;LOC_Os03g15340;LOC_Os06g36670;LOC_Os03g55830;LOC_Os03g45720;LOC_Os03g10310;LOC_Os04g58810;LOC_Os12g44280;LOC_Os01g14850;LOC_Os12g40860;LOC_Os02g16690;LOC_Os08g06600;LOC_Os04g07150;LOC_Os07g42250;LOC_Os03g25490;LOC_Os08g32920;LOC_Os11g06730;LOC_Os01g67810;LOC_Os01g62670;LOC_Os05g46760;LOC_Os09g38450;LOC_Os01g33950;LOC_Os01g68730;LOC_Os08g03180;LOC_Os01g…
GO:0009504	cell plate	Cellular Component	1	1	0.662924	LOC_Os03g02290
GO:0030599	pectinesterase activity	Molecular Function	1	1	0.663593	LOC_Os09g26360
GO:0005622	intracellular	Cellular Component	2	1	0.663825	LOC_Os08g31850;LOC_Os07g22580
GO:0043167	ion binding	Molecular Function	2	1	0.666483	LOC_Os04g10890;LOC_Os02g06930
GO:0004519	endonuclease activity	Molecular Function	1	1	0.66677	LOC_Os01g56940
GO:0050660	flavin adenine dinucleotide binding	Molecular Function	2	1	0.670874	LOC_Os09g19930;LOC_Os01g71310
GO:0000145	exocyst	Cellular Component	1	1	0.670897	LOC_Os01g67810
GO:0004252	serine-type endopeptidase activity	Molecular Function	4	1	0.673201	LOC_Os02g16940;LOC_Os03g06290;LOC_Os04g47170;LOC_Os08g39760
GO:0005777	peroxisome	Cellular Component	5	1	0.67883	LOC_Os01g72530;LOC_Os03g06290;LOC_Os10g42800;LOC_Os06g11730;LOC_Os06g21230
GO:0004857	enzyme inhibitor activity	Molecular Function	1	1	0.685214	LOC_Os09g26360
GO:0005802	trans-Golgi network	Cellular Component	5	1	0.685791	LOC_Os02g56510;LOC_Os11g04380;LOC_Os06g29790;LOC_Os02g30610;LOC_Os01g66110
GO:0044464	cell part	Cellular Component	20	1	0.69086	LOC_Os08g41520;LOC_Os09g26590;LOC_Os03g10260;LOC_Os05g50960;LOC_Os07g45530;LOC_Os02g51720;LOC_Os09g36790;LOC_Os02g09980;LOC_Os06g33970;LOC_Os03g53020;LOC_Os02g02730;LOC_Os06g05410;LOC_Os04g48290;LOC_Os04g10890;LOC_Os12g44280;LOC_Os04g56680;LOC_Os02g33330;LOC_Os03g38250;LOC_Os06g17570;LOC_Os04g01470
GO:0004867	serine-type endopeptidase inhibitor activity	Molecular Function	2	1	0.692129	LOC_Os01g03360;LOC_Os01g03680
GO:0044425	membrane part	Cellular Component	1	1	0.700952	LOC_Os05g11130
GO:0004091	carboxylic ester hydrolase activity	Molecular Function	1	1	0.70545	LOC_Os04g42860
GO:0009706	chloroplast inner membrane	Cellular Component	1	1	0.708028	LOC_Os02g24598
GO:0005788	endoplasmic reticulum lumen	Cellular Component	1	1	0.724996	LOC_Os04g31940
GO:0009941	chloroplast envelope	Cellular Component	10	1	0.733476	LOC_Os09g16449;LOC_Os03g18070;LOC_Os04g16740;LOC_Os03g52460;LOC_Os02g21340;LOC_Os03g02290;LOC_Os07g32390;LOC_Os11g37700;LOC_Os02g07870;LOC_Os01g50420
GO:0003743	translation initiation factor activity	Molecular Function	1	1	0.739651	LOC_Os01g17330
GO:0010287	plastoglobule	Cellular Component	1	1	0.740981	LOC_Os04g16740
GO:0010319	stromule	Cellular Component	1	1	0.744065	LOC_Os04g16740
GO:1901363	heterocyclic compound binding	Molecular Function	3	1	0.755308	LOC_Os01g36220;LOC_Os01g68730;LOC_Os03g05210
GO:0005635	nuclear envelope	Cellular Component	1	1	0.758944	LOC_Os03g47620
GO:0000151	ubiquitin ligase complex	Cellular Component	1	1	0.778337	LOC_Os02g33680
GO:0005829	cytosol	Cellular Component	37	1	0.783163	LOC_Os02g21340;LOC_Os03g02290;LOC_Os05g33890;LOC_Os01g49200;LOC_Os11g37700;LOC_Os04g56230;LOC_Os02g45940;LOC_Os03g12290;LOC_Os06g21230;LOC_Os03g57720;LOC_Os02g51040;LOC_Os04g47170;LOC_Os05g42230;LOC_Os01g53430;LOC_Os01g17330;LOC_Os03g05210;LOC_Os07g48760;LOC_Os03g49050;LOC_Os01g33080;LOC_Os03g10310;LOC_Os01g57540;LOC_Os06g29790;LOC_Os03g47620;LOC_Os05g41780;LOC_Os04g49130;LOC_Os02g07870;LOC_Os12g…
GO:0016021	integral component of membrane	Cellular Component	28	1	0.790045	LOC_Os11g37700;LOC_Os02g24598;LOC_Os07g26660;LOC_Os03g55870;LOC_Os07g37110;LOC_Os11g12620;LOC_Os01g41420;LOC_Os03g05440;LOC_Os08g05290;LOC_Os02g47470;LOC_Os11g30500;LOC_Os06g02019;LOC_Os02g05970;LOC_Os02g05940;LOC_Os06g29790;LOC_Os04g48760;LOC_Os11g04380;LOC_Os03g18070;LOC_Os09g16449;LOC_Os11g07912;LOC_Os01g48570;LOC_Os06g17570;LOC_Os04g53930;LOC_Os02g56510;LOC_Os05g40200;LOC_Os01g33950;LOC_Os01g…
GO:0004722	protein serine/threonine phosphatase activity	Molecular Function	1	1	0.807903	LOC_Os03g51530
GO:0005783	endoplasmic reticulum	Cellular Component	9	1	0.824834	LOC_Os03g04530;LOC_Os05g37250;LOC_Os06g39750;LOC_Os03g12140;LOC_Os08g44360;LOC_Os12g10750;LOC_Os06g03930;LOC_Os05g51220;LOC_Os03g18070
GO:0097159	organic cyclic compound binding	Molecular Function	3	1	0.828551	LOC_Os01g36220;LOC_Os01g68730;LOC_Os03g05210
GO:0043531	ADP binding	Molecular Function	6	1	0.834157	LOC_Os03g38250;LOC_Os05g31610;LOC_Os11g28950;LOC_Os12g37280;LOC_Os11g43420;LOC_Os01g71820
GO:0016491	oxidoreductase activity	Molecular Function	5	1	0.852646	LOC_Os04g31940;LOC_Os09g20090;LOC_Os06g03720;LOC_Os11g07912;LOC_Os03g18640
GO:0004568	chitinase activity	Molecular Function	3	1	0.881436	LOC_Os06g04230;LOC_Os03g14140;LOC_Os03g21000
GO:0022626	cytosolic ribosome	Cellular Component	2	1	0.883346	LOC_Os06g39750;LOC_Os11g04380
GO:0016772	transferase activity, transferring phosphorus-containing groups	Molecular Function	1	1	0.889363	LOC_Os04g10890
GO:0008233	peptidase activity	Molecular Function	2	1	0.891318	LOC_Os07g07860;LOC_Os02g26480
GO:0016787	hydrolase activity	Molecular Function	16	1	0.906485	LOC_Os04g56680;LOC_Os08g37180;LOC_Os02g07110;LOC_Os12g40860;LOC_Os04g56230;LOC_Os11g10560;LOC_Os11g06730;LOC_Os01g09870;LOC_Os09g26360;LOC_Os10g35500;LOC_Os10g39850;LOC_Os11g42170;LOC_Os06g46350;LOC_Os08g41520;LOC_Os08g03180;LOC_Os01g36220
GO:0043229	intracellular organelle	Cellular Component	6	1	0.908128	LOC_Os11g06730;LOC_Os12g10670;LOC_Os01g70560;LOC_Os03g19200;LOC_Os03g51530;LOC_Os03g08330
GO:0009570	chloroplast stroma	Cellular Component	8	1	0.929343	LOC_Os06g10420;LOC_Os08g05290;LOC_Os01g27760;LOC_Os11g12620;LOC_Os05g33570;LOC_Os03g52460;LOC_Os09g23560;LOC_Os03g21000
GO:0005768	endosome	Cellular Component	3	1	0.934709	LOC_Os02g30610;LOC_Os11g04380;LOC_Os01g66110
GO:0003824	catalytic activity	Molecular Function	14	1	0.962557	LOC_Os12g06980;LOC_Os07g42250;LOC_Os11g10560;LOC_Os06g36670;LOC_Os01g47580;LOC_Os01g57250;LOC_Os12g08850;LOC_Os08g39760;LOC_Os01g40070;LOC_Os10g25230;LOC_Os01g44360;LOC_Os09g38450;LOC_Os03g64340;LOC_Os05g08420
GO:0008483	transaminase activity	Molecular Function	1	1	0.96305	LOC_Os12g08850
GO:0009507	chloroplast	Cellular Component	28	1	0.963904	LOC_Os01g50410;LOC_Os12g02200;LOC_Os11g30500;LOC_Os02g47470;LOC_Os06g10420;LOC_Os04g49420;LOC_Os02g05970;LOC_Os03g04530;LOC_Os02g05940;LOC_Os08g37180;LOC_Os01g02060;LOC_Os02g51040;LOC_Os02g45940;LOC_Os06g21230;LOC_Os07g26660;LOC_Os11g03370;LOC_Os11g07830;LOC_Os06g11730;LOC_Os01g62990;LOC_Os08g18920;LOC_Os08g38300;LOC_Os05g07820;LOC_Os03g64340;LOC_Os04g42860;LOC_Os01g09220;LOC_Os06g39750;LOC_Os04g…
GO:0003682	chromatin binding	Molecular Function	3	1	0.969804	LOC_Os02g41510;LOC_Os12g41910;LOC_Os01g02740
GO:0005840	ribosome	Cellular Component	2	1	0.969814	LOC_Os09g31019;LOC_Os06g09310
GO:0005524	ATP binding	Molecular Function	27	1	0.984564	LOC_Os01g33040;LOC_Os01g57540;LOC_Os02g06930;LOC_Os07g48760;LOC_Os12g39980;LOC_Os04g30720;LOC_Os03g12290;LOC_Os11g37700;LOC_Os03g02290;LOC_Os02g21340;LOC_Os11g35860;LOC_Os12g10670;LOC_Os12g37400;LOC_Os11g12620;LOC_Os01g02750;LOC_Os01g50410;LOC_Os12g02200;LOC_Os08g05290;LOC_Os09g18159;LOC_Os02g07870;LOC_Os04g59320;LOC_Os02g05970;LOC_Os10g42800;LOC_Os09g38910;LOC_Os08g44420;LOC_Os02g05940;LOC_Os01g…
GO:0005351	sugar	Molecular Function	1	1	0.990953	LOC_Os04g53930
GO:0009535	chloroplast thylakoid membrane	Cellular Component	2	1	0.996904	LOC_Os04g53930;LOC_Os04g16740
GO:0003735	structural constituent of ribosome	Molecular Function	1	1	0.997356	LOC_Os09g31019
GO:0016740	transferase activity	Molecular Function	1	1	0.998398	LOC_Os07g19140
GO:0043231	intracellular membrane-bounded organelle	Cellular Component	19	1	0.999613	LOC_Os09g38450;LOC_Os01g33950;LOC_Os01g72360;LOC_Os01g03710;LOC_Os12g03730;LOC_Os01g56380;LOC_Os01g42070;LOC_Os04g48760;LOC_Os12g08850;LOC_Os09g26360;LOC_Os07g49114;LOC_Os06g03710;LOC_Os03g51390;LOC_Os06g09310;LOC_Os03g15340;LOC_Os04g07920;LOC_Os03g05440;LOC_Os06g36040;LOC_Os09g30160
GO:0005488	binding	Molecular Function	17	1	0.999957	LOC_Os04g07150;LOC_Os11g28950;LOC_Os10g20770;LOC_Os03g25490;LOC_Os08g32920;LOC_Os03g30150;LOC_Os03g38250;LOC_Os04g58810;LOC_Os11g43420;LOC_Os04g40560;LOC_Os02g07110;LOC_Os08g06600;LOC_Os03g04530;LOC_Os08g44420;LOC_Os08g31850;LOC_Os06g09310;LOC_Os06g46995
GO:0016779	nucleotidyltransferase activity	Molecular Function	1	1	0.999986	LOC_Os01g02740
GO:0004190	aspartic-type endopeptidase activity	Molecular Function	4	1	0.999999	LOC_Os05g51220;LOC_Os01g02740;LOC_Os01g25688;LOC_Os07g19140
GO:0008234	cysteine-type peptidase activity	Molecular Function	1	1	1	LOC_Os12g03410
GO:0005886	plasma membrane	Cellular Component	35	1	1	LOC_Os12g41910;LOC_Os04g48760;LOC_Os06g17490;LOC_Os01g53840;LOC_Os10g39870;LOC_Os11g04380;LOC_Os12g03730;LOC_Os01g72530;LOC_Os09g16449;LOC_Os01g13610;LOC_Os01g48570;LOC_Os02g46460;LOC_Os04g01470;LOC_Os05g07820;LOC_Os01g57370;LOC_Os07g37385;LOC_Os04g16740;LOC_Os11g45540;LOC_Os01g09220;LOC_Os03g64340;LOC_Os05g39240;LOC_Os09g28440;LOC_Os07g22580;LOC_Os03g61470;LOC_Os02g35760;LOC_Os03g01530;LOC_Os03g…
GO:0003676	nucleic acid binding	Molecular Function	8	1	1	LOC_Os03g30150;LOC_Os12g06980;LOC_Os07g43120;LOC_Os04g58810;LOC_Os04g10890;LOC_Os10g42910;LOC_Os03g15790;LOC_Os03g05250
GO:0005634	nucleus	Cellular Component	38	1	1	LOC_Os10g31930;LOC_Os08g34170;LOC_Os12g41910;LOC_Os02g42560;LOC_Os09g36740;LOC_Os09g31019;LOC_Os07g46540;LOC_Os02g51910;LOC_Os06g46950;LOC_Os09g28580;LOC_Os01g72530;LOC_Os01g60600;LOC_Os10g39870;LOC_Os04g01470;LOC_Os12g42160;LOC_Os01g09100;LOC_Os09g35030;LOC_Os04g34240;LOC_Os12g29330;LOC_Os04g48260;LOC_Os12g13950;LOC_Os11g45540;LOC_Os03g42630;LOC_Os04g41960;LOC_Os01g64020;LOC_Os02g35760;LOC_Os10g…
GO:0016020	membrane	Cellular Component	30	1	1	LOC_Os06g03720;LOC_Os08g25690;LOC_Os03g21820;LOC_Os01g10490;LOC_Os09g26360;LOC_Os11g33270;LOC_Os10g28420;LOC_Os05g11130;LOC_Os09g27330;LOC_Os06g50400;LOC_Os04g52950;LOC_Os05g08420;LOC_Os04g52090;LOC_Os01g72360;LOC_Os01g68730;LOC_Os09g38450;LOC_Os04g12540;LOC_Os11g34110;LOC_Os06g08090;LOC_Os04g31940;LOC_Os06g39750;LOC_Os01g03710;LOC_Os01g36220;LOC_Os08g06600;LOC_Os06g47600;LOC_Os11g02610;LOC_Os02g…
GO:0003677	DNA binding	Molecular Function	19	1	1	LOC_Os10g01570;LOC_Os07g43120;LOC_Os05g02150;LOC_Os07g19140;LOC_Os01g31800;LOC_Os04g30720;LOC_Os01g48446;LOC_Os12g10670;LOC_Os02g45420;LOC_Os03g06670;LOC_Os03g51910;LOC_Os08g33100;LOC_Os05g36280;LOC_Os02g41510;LOC_Os09g35010;LOC_Os03g53020;LOC_Os01g02740;LOC_Os06g06460;LOC_Os01g64640
GO:0003964	RNA-directed DNA polymerase activity	Molecular Function	4	1	1	LOC_Os07g19140;LOC_Os02g54280;LOC_Os01g02740;LOC_Os05g36040
GO:0008270	zinc ion binding	Molecular Function	5	1	1	LOC_Os05g43610;LOC_Os08g31850;LOC_Os01g25688;LOC_Os03g15790;LOC_Os10g40810
GO:0003723	RNA binding	Molecular Function	2	1	1	LOC_Os01g25688;LOC_Os02g07370
GO:0009536	plastid	Cellular Component	10	1	1	LOC_Os02g08220;LOC_Os02g07370;LOC_Os02g34640;LOC_Os05g41780;LOC_Os09g18159;LOC_Os12g06190;LOC_Os03g49050;LOC_Os05g33890;LOC_Os05g37250;LOC_Os01g49200
GO:0016023	cytoplasmic membrane-bounded vesicle	Cellular Component	21	1	1	LOC_Os10g20890;LOC_Os11g31940;LOC_Os02g52040;LOC_Os01g53840;LOC_Os09g20090;LOC_Os01g71690;LOC_Os04g38530;LOC_Os02g26480;LOC_Os08g41070;LOC_Os11g45540;LOC_Os10g20770;LOC_Os06g21230;LOC_Os11g06990;LOC_Os02g51040;LOC_Os10g42800;LOC_Os11g01730;LOC_Os03g04530;LOC_Os03g14140;LOC_Os10g09870;LOC_Os09g19930;LOC_Os05g51220
GO:0005739	mitochondrion	Cellular Component	8	1	1	LOC_Os05g36040;LOC_Os07g48760;LOC_Os02g06930;LOC_Os04g10890;LOC_Os07g42250;LOC_Os12g10750;LOC_Os02g09970;LOC_Os08g03180

## Sheet: Sheet 3, OE_KEGG Pathway
Sheet 3. KEGG pathway enrichment of genes in Group II .
KEGG Classfication	KEGG Pathway	MSU Locus
genetic information processing	Mismatch repair	LOC_Os01g56940;LOC_Os03g11540
	Nucleotide excision repair	LOC_Os02g30800;LOC_Os03g11540
	Ribosome	LOC_Os09g31019
	Ubiquitin mediated proteolysis	LOC_Os01g74146;LOC_Os04g49130
	Ribosome biogenesis in eukaryotes	LOC_Os01g17330
	Homologous recombination	LOC_Os03g11540
	RNA transport	LOC_Os04g49130
	DNA replication	LOC_Os02g30800;LOC_Os02g55410;LOC_Os03g11540;LOC_Os05g29010;LOC_Os12g13950;LOC_Os12g37400
	RNA degradation	LOC_Os04g58810;LOC_Os08g34170
cellular processes	Endocytosis	LOC_Os02g06340;LOC_Os08g32920
	Peroxisome	LOC_Os08g44360
	Regulation of autophagy	LOC_Os07g48760
	Phagosome	LOC_Os02g07870;LOC_Os03g01530
organismal systems	Plant-pathogen interaction	LOC_Os01g41990;LOC_Os01g72530
Environmental information processing	Plant hormone signal transduction	LOC_Os01g64020;LOC_Os02g07110;LOC_Os02g24700;LOC_Os03g08330;LOC_Os04g56680;LOC_Os06g36670;LOC_Os09g02360;LOC_Os10g25230;LOC_Os10g25290
metabolism	Tyrosine metabolism	LOC_Os01g56380
	Diterpenoid biosynthesis	LOC_Os06g02019
	Terpenoid backbone biosynthesis	LOC_Os04g56230
	Carbon metabolism	LOC_Os05g33570
	Carbon fixation in photosynthetic organisms	LOC_Os05g33570
	Galactose metabolism	LOC_Os04g38530
	Phenylalanine metabolism	LOC_Os12g08920
	Carotenoid biosynthesis	LOC_Os02g47470
	Cyanoamino acid metabolism	LOC_Os01g59840
	Oxidative phosphorylation	LOC_Os02g07870;LOC_Os04g16740
	Taurine and hypotaurine metabolism	LOC_Os08g37470;LOC_Os12g42860
	Fatty acid elongation	LOC_Os06g39750
	Biosynthesis of unsaturated fatty acids	LOC_Os03g18070;LOC_Os08g10010
	Amino sugar and nucleotide sugar metabolism	LOC_Os01g03710;LOC_Os03g52460
	Arginine and proline metabolism	LOC_Os03g12290
	Base excision repair	LOC_Os02g30800
	Fatty acid metabolism	LOC_Os03g18070;LOC_Os08g10010
	Pyruvate metabolism	LOC_Os05g33570
	Isoquinoline alkaloid biosynthesis	LOC_Os01g56380
	Nitrogen metabolism	LOC_Os03g12290
	Fructose and mannose metabolism	LOC_Os01g03710
	Starch and sucrose metabolism	LOC_Os01g59840;LOC_Os03g52460;LOC_Os05g44210
	Glutathione metabolism	LOC_Os06g03720
	Phenylalanine, tyrosine and tryptophan biosynthesis	LOC_Os01g27760
	Cutin, suberine and wax biosynthesis	LOC_Os08g44360;LOC_Os09g19930
	Glyoxylate and dicarboxylate metabolism	LOC_Os03g12290
	Cysteine and methionine metabolism	LOC_Os09g27750;LOC_Os09g27820;LOC_Os10g01570;LOC_Os10g28630
	Phenylpropanoid biosynthesis	LOC_Os01g59840;LOC_Os09g23560;LOC_Os12g08920
	Pyrimidine metabolism	LOC_Os02g30800;LOC_Os05g29010;LOC_Os06g03720;LOC_Os12g13950
	Fatty acid biosynthesis	LOC_Os08g10010
	Glycolysis / Gluconeogenesis	LOC_Os04g38530
	Brassinosteroid biosynthesis	LOC_Os05g11130
	Alanine, aspartate and glutamate metabolism	LOC_Os03g12290
	Zeatin biosynthesis	LOC_Os01g71310
	Biosynthesis of amino acids	LOC_Os01g27760;LOC_Os03g12290
	Photosynthesis	LOC_Os04g16740
	Purine metabolism	LOC_Os02g30800;LOC_Os05g29010;LOC_Os06g03720;LOC_Os12g13950
